# Supplementary material for: Mysterious inhibitory cell regulator investigated and found likely to be secretogranin II related
Source: PeerJ. 2017 Oct 13;5:e3833. doi: 10.7717/peerj.3833 (PMC5642266; doi:10.7717/peerj.3833)
Supplement: Supplemental Information 2 — Provided here is a key to eighteen Raw Data files, RD 1-18. The raw data depository also includes three files (RD 19-21) relating to the mammalian and fruit fly lead candidates. [file peerj-05-3833-s002.xlsx]

## Sheet: Sheet1
Sample Description	Sample Date	MS Sample Name	Uniprot Database used for search	Total hits	Test only	Raw Data File
Dmel embryo unfixed (no antigen retrieval) Control	O21214	Dr4 Control	Drosophila melanogaster	700		RD1
Dmel embryo unfixed (no antigen retrieval) Test	O21214	Dr3 Test	Drosophila melanogaster	1129	526	RD2/RD3
Dmel embryo fixed (RIPA antigen retrieval) Control	240215	Fixed Control	Drosophila melanogaster	634		RD4
Dmel embryo fixed (RIPA antigen retrieval) Test	240215	Fixed Test	Drosophila melanogaster	71	30	RD5/RD6
Pheochromocytoma unfixed (no antigen retrieval) Control	O90714	P2 Unfixed Control	Rat	1095		RD7
Pheochromocytoma unfixed (no antigen retrieval) Test	O90714	P1 Unfixed Test	Rat	1516	603	RD8/RD9
Hypothalamus unfixed (no antigen retrieval) Control	O90714	H2 Unfixed Control	Rat	1634		RD10
Hypothalamus unfixed (no antigen retrieval) Test	O90714	H1 Unfixed Test	Rat	1681	424	RD11/RD12
Hypothalamus fixed (RIPA retrieved) Control	210415	RIPA Control	Rat	226		RD13
Hypothalamus fixed (RIPA retrieved) Test	210415	RIPA Test	Rat	406	213	RD14/RD15
Hypothalamus fixed (Citrate retrieved) Control	210415	Citrate Control	Rat	438		RD16
Hypothalamus fixed (Citrate retrieved) Test	210415	Citrate Test	Rat	454	114	RD17/RD18
