# Supplementary material for: Mysterious inhibitory cell regulator investigated and found likely to be secretogranin II related
Source: PeerJ. 2017 Oct 13;5:e3833. doi: 10.7717/peerj.3833 (PMC5642266; doi:10.7717/peerj.3833)
Supplement: Supplemental Information 4 — Total hits 1129. [file peerj-05-3833-s004.xlsx]

## Sheet: Sheet1
Accession	Description	Score	Coverage	# Proteins	# Unique Peptides	# Peptides	# PSMs	Area	# AAs	MW [kDa]	calc. pI
Q9V496	Apolipophorins OS=Drosophila melanogaster GN=Rfabg PE=1 SV=2 - [APLP_DROME]	216.24	12.92	1	32	32	64	3.89002e+07	3351	372.447	7.97217
P11147	Heat shock 70 kDa protein cognate 4 OS=Drosophila melanogaster GN=Hsc70-4 PE=1 SV=3 - [HSP7D_DROME]	214.269	41.63	7	19	23	71	1.15541e+08	651	71.0874	5.51611
P02844	Vitellogenin-2 OS=Drosophila melanogaster GN=Yp2 PE=1 SV=2 - [VIT2_DROME]	199.5	41.18	1	15	15	57	5.10693e+08	442	49.63	7.95752
Q05825	ATP synthase subunit beta, mitochondrial OS=Drosophila melanogaster GN=ATPsyn-beta PE=2 SV=3 - [ATPB_DROME]	189.692	45.74	3	16	16	59	6.6474e+07	505	54.0744	5.2749
Q9V6K1-2	Isoform 2 of Tripeptidyl-peptidase 2 OS=Drosophila melanogaster GN=TppII - [TPP2_DROME]	186.869	25.48	2	30	30	65	5.0069e+07	1354	148.816	6.99072
P02828	Heat shock protein 83 OS=Drosophila melanogaster GN=Hsp83 PE=1 SV=1 - [HSP83_DROME]	171.017	29.99	2	20	21	57	9.09747e+07	717	81.8142	5.021
Q9V3P0	Peroxiredoxin 1 OS=Drosophila melanogaster GN=Jafrac1 PE=1 SV=1 - [PRDX1_DROME]	165.156	55.67	1	10	10	47	4.73068e+08	194	21.724	5.70654
Q24560	Tubulin beta-1 chain OS=Drosophila melanogaster GN=betaTub56D PE=1 SV=2 - [TBB1_DROME]	158.382	39.37	6	8	14	53	4.97602e+07	447	50.1151	4.85596
P13395	Spectrin alpha chain OS=Drosophila melanogaster GN=alpha-Spec PE=1 SV=2 - [SPTCA_DROME]	152.723	16.98	4	33	33	52	2.97143e+07	2415	278.132	5.19873
Q9VG16	Granny smith, isoform D OS=Drosophila melanogaster GN=grsm PE=4 SV=3 - [Q9VG16_DROME]	148.405	37.71	2	15	15	45	4.64154e+07	533	57.1749	6.21436
P07764	Fructose-bisphosphate aldolase OS=Drosophila melanogaster GN=Ald PE=1 SV=5 - [ALF_DROME]	141.334	38.78	3	13	13	42	3.35456e+07	361	39.0233	7.40088
P02572	Actin-42A OS=Drosophila melanogaster GN=Act42A PE=1 SV=3 - [ACT2_DROME]	138.676	36.97	3	3	12	47	3.78135e+08	376	41.7968	5.47803
O02649	60 kDa heat shock protein, mitochondrial OS=Drosophila melanogaster GN=Hsp60 PE=1 SV=3 - [CH60_DROME]	137.193	35.95	2	16	16	41	3.10854e+07	573	60.7709	5.49072
E1JGP0	Actin 57B, isoform C OS=Drosophila melanogaster GN=Act57B PE=2 SV=1 - [E1JGP0_DROME]	129.111	37.22	3	2	12	44	3.77845e+08	360	40.2322	5.8335
O18640	Guanine nucleotide-binding protein subunit beta-like protein OS=Drosophila melanogaster GN=Rack1 PE=1 SV=2 - [GBLP_DROME]	127.646	52.2	3	15	15	42	1.1834e+08	318	35.5957	7.47412
P15007-2	Isoform A of Enolase OS=Drosophila melanogaster GN=Eno - [ENO_DROME]	127.006	47.58	2	16	16	39	1.23783e+08	433	46.633	6.55127
P10981	Actin-87E OS=Drosophila melanogaster GN=Act87E PE=1 SV=1 - [ACT5_DROME]	121.992	32.71	4	1	11	41	3.77845e+08	376	41.7748	5.47803
P08736	Elongation factor 1-alpha 1 OS=Drosophila melanogaster GN=Ef1alpha48D PE=1 SV=2 - [EF1A1_DROME]	119.812	24.19	2	9	9	43	3.88091e+08	463	50.2754	9.0708
P29844	Heat shock 70 kDa protein cognate 3 OS=Drosophila melanogaster GN=Hsc70-3 PE=2 SV=2 - [HSP7C_DROME]	119.723	30.34	2	13	17	40	3.59715e+07	656	72.2165	5.36377
P06607	Vitellogenin-3 OS=Drosophila melanogaster GN=Yp3 PE=1 SV=1 - [VIT3_DROME]	112.261	38.33	1	14	14	38	2.93584e+08	420	46.0726	8.49951
Q9V3V6	26S proteasome regulatory complex subunit p50 OS=Drosophila melanogaster GN=Rpt5 PE=2 SV=1 - [Q9V3V6_DROME]	111.865	30.37	1	9	10	35	5.11804e+07	428	47.7767	5.33838
Q9V3P6	26S proteasome non-ATPase regulatory subunit 1 OS=Drosophila melanogaster GN=Rpn2 PE=1 SV=1 - [PSMD1_DROME]	108.239	27.65	2	22	22	37	3.29121e+07	1020	113.127	5.18604
Q7KMQ0	26S proteasome regulatory complex subunit p48B OS=Drosophila melanogaster GN=Rpt1 PE=2 SV=1 - [Q7KMQ0_DROME]	105.931	37.64	2	13	14	35	4.07949e+07	433	48.511	6.03662
P52029	Glucose-6-phosphate isomerase OS=Drosophila melanogaster GN=Pgi PE=2 SV=2 - [G6PI_DROME]	105.303	32.08	1	11	11	33	4.87817e+07	558	62.2999	7.12256
Q59E58	Zipper, isoform C OS=Drosophila melanogaster GN=zip PE=4 SV=1 - [Q59E58_DROME]	104.197	13.29	6	21	21	32	1.07816e+07	1971	226.778	5.46533
Q9VFQ9	Dipeptidase B, isoform A OS=Drosophila melanogaster GN=Dip-B PE=2 SV=2 - [Q9VFQ9_DROME]	101.565	35.83	1	15	15	31	7.32492e+07	508	55.4986	6.75635
P18091-2	Isoform Non-muscle of Alpha-actinin, sarcomeric OS=Drosophila melanogaster GN=Actn - [ACTN_DROME]	100.747	26.68	6	19	19	34	1.89418e+07	892	103.355	5.69385
Q9VHN7	CG8036, isoform B OS=Drosophila melanogaster GN=CG8036 PE=2 SV=3 - [Q9VHN7_DROME]	98.1423	22.04	3	12	12	30	6.57923e+07	626	67.989	7.10791
Q9VJ19	RE25263p OS=Drosophila melanogaster GN=RpL30 PE=1 SV=1 - [Q9VJ19_DROME]	96.3099	62.16	2	7	7	28	3.84294e+08	111	12.2265	9.5835
Q9XTL9	Glycogen phosphorylase OS=Drosophila melanogaster GN=GlyP PE=2 SV=2 - [PYG_DROME]	96.2815	24.53	1	18	18	33	2.74747e+07	844	96.9352	6.52197
Q7KUB0	Isocitrate dehydrogenase [NADP] OS=Drosophila melanogaster GN=Idh PE=3 SV=1 - [Q7KUB0_DROME]	94.0081	41.59	5	14	14	29	2.28659e+07	416	46.6308	6.7417
P06603	Tubulin alpha-1 chain OS=Drosophila melanogaster GN=alphaTub84B PE=2 SV=1 - [TBA1_DROME]	93.1857	35.11	3	11	11	29	9.27951e+07	450	49.8765	5.13525
Q02748	Eukaryotic initiation factor 4A OS=Drosophila melanogaster GN=eIF-4a PE=1 SV=3 - [IF4A_DROME]	91.405	35.24	2	13	13	30	5.28157e+07	403	45.8494	5.65576
P31409	V-type proton ATPase subunit B OS=Drosophila melanogaster GN=Vha55 PE=2 SV=1 - [VATB_DROME]	89.4445	32.24	1	13	13	28	3.2478e+07	490	54.5149	5.40186
Q9VSA3	Probable medium-chain specific acyl-CoA dehydrogenase, mitochondrial OS=Drosophila melanogaster GN=CG12262 PE=1 SV=1 - [ACADM_DROME]	87.6231	30.31	1	9	9	24	2.29852e+07	419	45.8424	7.94287
Q94511	NADH-ubiquinone oxidoreductase 75 kDa subunit, mitochondrial OS=Drosophila melanogaster GN=ND75 PE=2 SV=3 - [NDUS1_DROME]	87.3755	27.91	1	13	13	25	1.9679e+07	731	78.5807	6.84424
P92177-4	Isoform C of 14-3-3 protein epsilon OS=Drosophila melanogaster GN=14-3-3epsilon - [1433E_DROME]	87.0863	46.48	4	10	12	28	5.90816e+07	256	29.1545	4.84326
Q06559	40S ribosomal protein S3 OS=Drosophila melanogaster GN=RpS3 PE=1 SV=1 - [RS3_DROME]	85.9413	41.87	1	8	8	31	2.99426e+07	246	27.4536	9.39307
O62619-2	Isoform B of Pyruvate kinase OS=Drosophila melanogaster GN=PyK - [KPYK_DROME]	85.9325	33.01	2	15	15	29	4.91559e+07	512	55.0237	7.85498
Q7KN62	Transitional endoplasmic reticulum ATPase TER94 OS=Drosophila melanogaster GN=TER94 PE=1 SV=1 - [TERA_DROME]	85.2634	24.84	4	15	15	25	2.30421e+07	801	88.8033	5.35107
Q9VLC5	Aldehyde dehydrogenase OS=Drosophila melanogaster GN=Aldh PE=3 SV=1 - [Q9VLC5_DROME]	84.499	29.62	1	12	12	27	1.57899e+08	520	56.983	6.80029
P54399	Protein disulfide-isomerase OS=Drosophila melanogaster GN=Pdi PE=2 SV=1 - [PDI_DROME]	84.0872	29.84	2	12	12	27	1.07075e+07	496	55.7464	4.81787
Q9VW68	CG7433, isoform A OS=Drosophila melanogaster GN=CG7433 PE=3 SV=1 - [Q9VW68_DROME]	83.7313	36.01	1	14	14	25	3.07579e+07	486	54.5504	8.6167
A1Z9A8	Protein PTCD3 homolog, mitochondrial OS=Drosophila melanogaster GN=CG4679 PE=2 SV=1 - [PTCD3_DROME]	82.746	19.63	1	10	10	22	3.82448e+07	652	74.16	5.92236
Q9VNC1	Mitochondrial ribosomal protein L44 OS=Drosophila melanogaster GN=mRpL44 PE=4 SV=1 - [Q9VNC1_DROME]	82.4639	28.97	1	7	7	26	1.24632e+07	321	36.229	8.25049
Q27331	V-type proton ATPase catalytic subunit A isoform 2 OS=Drosophila melanogaster GN=Vha68-2 PE=1 SV=2 - [VATA2_DROME]	81.1359	21.66	3	11	11	26	2.15567e+07	614	68.2585	5.33838
Q9VTZ2	IP07673p OS=Drosophila melanogaster GN=ver PE=2 SV=1 - [Q9VTZ2_DROME]	81.0545	44.39	1	6	6	22	8.12171e+06	214	24.4159	6.53662
P13060	Elongation factor 2 OS=Drosophila melanogaster GN=EF2 PE=1 SV=4 - [EF2_DROME]	78.4519	18.72	1	13	13	28	1.26667e+08	844	94.3981	6.59521
Q00963	Spectrin beta chain OS=Drosophila melanogaster GN=beta-Spec PE=1 SV=2 - [SPTCB_DROME]	78.1518	12.53	3	21	22	26	7.99914e+06	2291	265.575	5.33838
M9ND95	Myosin heavy chain, isoform U OS=Drosophila melanogaster GN=Mhc PE=4 SV=1 - [M9ND95_DROME]	77.7049	8.88	32	14	14	25	5.80885e+06	1949	222.766	6.25244
B7YZQ7	Nucleosome remodeling factor-38kD, isoform B OS=Drosophila melanogaster GN=Nurf-38 PE=4 SV=1 - [B7YZQ7_DROME]	77.3123	46.21	2	9	9	21	3.9053e+07	290	32.6255	5.68115
P29742	Clathrin heavy chain OS=Drosophila melanogaster GN=Chc PE=1 SV=1 - [CLH_DROME]	77.1908	14.72	1	21	21	28	1.67933e+07	1678	191.055	5.71924
Q94523	Succinate dehydrogenase [ubiquinone] flavoprotein subunit, mitochondrial OS=Drosophila melanogaster GN=SdhA PE=2 SV=3 - [SDHA_DROME]	77.0171	31.32	1	14	14	24	2.01219e+07	661	72.2973	7.12256
Q8IPE8	Mitochondrial trifunctional protein alpha subunit, isoform B OS=Drosophila melanogaster GN=Mtpalpha PE=3 SV=1 - [Q8IPE8_DROME]	76.5334	27.82	2	15	15	26	2.47005e+07	744	79.5882	8.85107
Q9W3F6	CG1440, isoform A OS=Drosophila melanogaster GN=CG1440 PE=2 SV=2 - [Q9W3F6_DROME]	75.697	26.23	3	12	12	26	5.40524e+07	488	55.1213	6.01123
Q9W0S7	LD20211p OS=Drosophila melanogaster GN=Tudor-SN PE=1 SV=1 - [Q9W0S7_DROME]	74.0394	20.84	1	13	13	23	1.2697e+07	926	103.037	8.04541
P07487	Glyceraldehyde-3-phosphate dehydrogenase 2 OS=Drosophila melanogaster GN=Gapdh2 PE=1 SV=2 - [G3P2_DROME]	73.2681	30.72	1	2	8	23	1.56251e+08	332	35.3473	8.44092
P41042	40S ribosomal protein S4 OS=Drosophila melanogaster GN=RpS4 PE=1 SV=2 - [RS4_DROME]	72.6735	34.87	1	8	8	25	4.81976e+07	261	29.1159	10.1841
Q9V4E0	CG1970, isoform A OS=Drosophila melanogaster GN=CG1970-RA PE=2 SV=2 - [Q9V4E0_DROME]	71.7814	18.8	1	6	6	21	1.84217e+07	468	52.887	6.66846
Q7JVK1	HL07956p OS=Drosophila melanogaster GN=mRpL18 PE=2 SV=1 - [Q7JVK1_DROME]	70.142	54.84	1	9	9	21	2.9351e+07	186	21.1629	9.29053
P61851	Superoxide dismutase [Cu-Zn] OS=Drosophila melanogaster GN=Sod PE=1 SV=2 - [SODC_DROME]	68.7836	54.9	2	6	6	18	8.07561e+07	153	15.6887	6.11279
Q9VH07	RuvB-like helicase 1 OS=Drosophila melanogaster GN=pont PE=1 SV=1 - [RUVB1_DROME]	66.2367	30.92	1	11	11	21	2.35014e+07	456	50.2106	7.34229
Q9VZU4	CG12079 OS=Drosophila melanogaster GN=NDUFS3 PE=2 SV=1 - [Q9VZU4_DROME]	66.1419	30.57	1	6	6	21	2.18878e+07	265	29.9525	7.84033
Q9W392	CG7033 OS=Drosophila melanogaster GN=CG7033 PE=2 SV=2 - [Q9W392_DROME]	65.7887	23.93	1	10	10	19	1.43042e+07	535	58.0273	5.84619
Q7JR58	CG6543, isoform A OS=Drosophila melanogaster GN=CG6543 PE=2 SV=1 - [Q7JR58_DROME]	65.5364	45.76	1	10	10	22	4.60151e+07	295	31.5621	8.63135
P46223	60S ribosomal protein L7a OS=Drosophila melanogaster GN=RpL7A PE=1 SV=2 - [RL7A_DROME]	65.3796	27.31	1	7	7	21	8.41616e+07	271	30.7127	10.7114
A1ZBJ2	CG7461 OS=Drosophila melanogaster GN=CG7461 PE=3 SV=2 - [A1ZBJ2_DROME]	65.2119	23.44	1	13	13	20	1.64577e+07	627	68.325	7.76709
Q8T0L3	GH24511p OS=Drosophila melanogaster GN=Uba1 PE=2 SV=1 - [Q8T0L3_DROME]	64.6613	12.76	1	11	11	20	1.13841e+07	1191	130.676	5.2876
P29310	14-3-3 protein zeta OS=Drosophila melanogaster GN=14-3-3zeta PE=1 SV=1 - [1433Z_DROME]	64.285	37.5	3	5	7	19	3.51027e+07	248	28.2101	4.88135
Q3YMU0	ERp60 (Fragment) OS=Drosophila melanogaster GN=ERp60 PE=2 SV=1 - [Q3YMU0_DROME]	64.2279	27.2	1	11	11	24	1.73394e+07	489	55.3361	5.87158
M9PHN8	Adenosylhomocysteinase OS=Drosophila melanogaster GN=Ahcy13 PE=3 SV=1 - [M9PHN8_DROME]	64.0901	38.08	2	11	11	24	2.2393e+07	323	35.57	6.0874
P07486	Glyceraldehyde-3-phosphate dehydrogenase 1 OS=Drosophila melanogaster GN=Gapdh1 PE=2 SV=2 - [G3P1_DROME]	63.5978	27.71	1	1	7	19	1.39393e+08	332	35.3282	8.17725
Q9VGS2	Translationally-controlled tumor protein homolog OS=Drosophila melanogaster GN=Tctp PE=1 SV=1 - [TCTP_DROME]	63.3123	34.88	1	5	5	22	1.92278e+07	172	19.6246	4.80518
P14130	40S ribosomal protein S14 OS=Drosophila melanogaster GN=RpS14a PE=1 SV=1 - [RS14_DROME]	60.8808	46.36	1	7	7	19	4.33674e+07	151	16.2547	10.3452
Q9VUC1	Hsc70Cb, isoform A OS=Drosophila melanogaster GN=Hsc70Cb PE=2 SV=1 - [Q9VUC1_DROME]	60.8411	14.18	2	8	8	18	5.29608e+06	804	88.4457	5.42725
P08841	Tubulin beta-3 chain OS=Drosophila melanogaster GN=betaTub60D PE=2 SV=2 - [TBB3_DROME]	60.1462	19.16	1	1	7	21	2.22231e+07	454	50.8165	4.88135
P35381	ATP synthase subunit alpha, mitochondrial OS=Drosophila melanogaster GN=blw PE=1 SV=2 - [ATPA_DROME]	59.5284	23.01	1	12	12	21	7.02794e+07	552	59.3844	9.01221
P09180	60S ribosomal protein L4 OS=Drosophila melanogaster GN=RpL4 PE=1 SV=2 - [RL4_DROME]	59.2542	37.16	1	11	11	19	2.23205e+07	401	44.9981	11.4731
Q9W237	40S ribosomal protein S16 OS=Drosophila melanogaster GN=RpS16 PE=1 SV=1 - [RS16_DROME]	58.8482	45.27	1	8	8	21	6.98777e+07	148	16.7642	10.1694
Q7K221	Glutamate oxaloacetate transaminase 1, isoform A OS=Drosophila melanogaster GN=Got1 PE=2 SV=1 - [Q7K221_DROME]	57.8178	20.19	2	7	7	19	2.26113e+07	416	46.0583	7.53271
Q9W401	Probable citrate synthase, mitochondrial OS=Drosophila melanogaster GN=kdn PE=2 SV=1 - [CISY_DROME]	57.7085	19.61	2	7	7	18	1.47802e+07	464	51.5416	8.80713
Q7KMP8	26S proteasome regulatory complex subunit p39A OS=Drosophila melanogaster GN=Rpn9 PE=1 SV=1 - [Q7KMP8_DROME]	57.1633	25.39	1	9	9	19	5.73677e+07	382	43.7386	5.26221
P00334	Alcohol dehydrogenase OS=Drosophila melanogaster GN=Adh PE=1 SV=2 - [ADH_DROME]	56.7617	45.7	1	8	8	17	2.73864e+07	256	27.7439	7.95752
Q8MLY8	40S ribosomal protein S8 OS=Drosophila melanogaster GN=RpS8 PE=1 SV=1 - [RS8_DROME]	56.5207	38.94	1	6	6	16	3.56817e+07	208	23.7449	10.4771
Q00637	Superoxide dismutase [Mn], mitochondrial OS=Drosophila melanogaster GN=Sod2 PE=2 SV=3 - [SODM_DROME]	56.4994	24.88	1	3	3	15	2.30937e+07	217	24.6687	8.14795
P12881	Proteasome subunit alpha type-1 OS=Drosophila melanogaster GN=Prosalpha6 PE=1 SV=1 - [PSA1_DROME]	55.7112	42.65	1	9	9	20	1.97369e+07	279	31.0397	6.55127
O18404	3-hydroxyacyl-CoA dehydrogenase type-2 OS=Drosophila melanogaster GN=scu PE=1 SV=1 - [HCD2_DROME]	55.5822	46.67	2	8	8	16	1.50681e+07	255	26.8882	9.02686
P29613	Triosephosphate isomerase OS=Drosophila melanogaster GN=Tpi PE=1 SV=3 - [TPIS_DROME]	55.1163	40.08	2	7	8	18	6.51737e+07	247	26.6087	5.99854
P41374	Eukaryotic translation initiation factor 2 subunit 1 OS=Drosophila melanogaster GN=eIF-2alpha PE=2 SV=1 - [IF2A_DROME]	54.9197	29.33	1	7	7	17	1.6573e+07	341	38.6217	4.94482
P48610	Arginine kinase OS=Drosophila melanogaster GN=Argk PE=2 SV=2 - [KARG_DROME]	54.8955	27.81	5	9	9	17	1.89618e+07	356	39.8412	6.46826
P08181	Casein kinase II subunit alpha OS=Drosophila melanogaster GN=CkIIalpha PE=1 SV=2 - [CSK2A_DROME]	54.8759	43.45	1	11	11	18	4.67119e+07	336	39.9343	7.23975
Q94518	Nascent polypeptide-associated complex subunit alpha OS=Drosophila melanogaster GN=Nacalpha PE=1 SV=2 - [NACA_DROME]	54.3052	27.19	1	4	4	17	1.20389e+08	217	23.0067	4.7417
O18413	26S protease regulatory subunit 8 OS=Drosophila melanogaster GN=Rpt6 PE=1 SV=2 - [PRS8_DROME]	53.4793	28.15	2	8	9	18	3.70718e+07	405	45.8282	8.41162
Q8IPP8	CG31548 OS=Drosophila melanogaster GN=CG31548 PE=3 SV=1 - [Q8IPP8_DROME]	52.9309	40.23	1	7	8	18	3.08149e+07	256	27.14	8.71924
O01666	ATP synthase subunit gamma, mitochondrial OS=Drosophila melanogaster GN=ATPsyn-gamma PE=2 SV=2 - [ATPG_DROME]	52.7074	34.68	1	8	8	17	1.90688e+07	297	32.8501	9.21729
Q8MLS2	CG30410 OS=Drosophila melanogaster GN=Rpi PE=4 SV=3 - [Q8MLS2_DROME]	52.6333	42.74	1	8	8	17	3.42219e+07	241	26.5176	5.88428
Q9VEB1	CG7998 OS=Drosophila melanogaster GN=Mdh2 PE=2 SV=1 - [Q9VEB1_DROME]	52.0973	29.17	1	8	8	17	3.92222e+07	336	35.296	9.11475
P61209	ADP-ribosylation factor 1 OS=Drosophila melanogaster GN=Arf79F PE=2 SV=2 - [ARF1_DROME]	51.3301	27.47	1	3	4	15	1.49946e+07	182	20.6747	6.58057
Q9V3K3	RuvB-like helicase 2 OS=Drosophila melanogaster GN=rept PE=1 SV=1 - [RUVB2_DROME]	51.1291	25.16	1	11	11	19	1.64976e+07	481	53.5076	5.84619
P54611	V-type proton ATPase subunit E OS=Drosophila melanogaster GN=Vha26 PE=2 SV=1 - [VATE_DROME]	50.8434	34.96	1	7	7	19	1.81196e+07	226	26.0658	6.15088
Q26365-2	Isoform A of ADP,ATP carrier protein OS=Drosophila melanogaster GN=sesB - [ADT_DROME]	50.0728	34.11	3	10	10	20	4.13389e+07	299	32.8881	9.77393
P17336	Catalase OS=Drosophila melanogaster GN=Cat PE=1 SV=2 - [CATA_DROME]	49.9229	24.51	1	9	9	16	3.10187e+07	506	57.1134	8.17725
P55830-2	Isoform B of 40S ribosomal protein S3a OS=Drosophila melanogaster GN=RpS3A - [RS3A_DROME]	49.6718	44.95	2	9	9	17	8.15404e+07	218	24.8061	9.08545
P48605	T-complex protein 1 subunit gamma OS=Drosophila melanogaster GN=Cctgamma PE=2 SV=2 - [TCPG_DROME]	48.9043	25.37	1	13	13	18	1.24361e+07	544	59.3573	6.80029
Q7K3J0	CG8258 OS=Drosophila melanogaster GN=CG8258 PE=2 SV=1 - [Q7K3J0_DROME]	48.7259	19.96	1	8	8	14	7.66812e+06	546	59.3956	5.31299
Q9VKU3	CG6094 protein OS=Drosophila melanogaster GN=CG6094 PE=2 SV=1 - [Q9VKU3_DROME]	47.6884	29.06	1	4	4	15	3.13986e+07	203	22.7812	10.3306
Q9VKI8	CG6287 OS=Drosophila melanogaster GN=CG6287 PE=2 SV=1 - [Q9VKI8_DROME]	47.6084	33.13	1	9	9	17	1.3031e+07	332	35.2127	7.35693
P25161	Probable 26S proteasome non-ATPase regulatory subunit 3 OS=Drosophila melanogaster GN=Rpn3 PE=2 SV=1 - [PSMD3_DROME]	47.356	22.87	1	10	10	16	1.37672e+07	494	55.9696	8.99756
Q9V3D0	LD33485p OS=Drosophila melanogaster GN=mRpL4 PE=2 SV=1 - [Q9V3D0_DROME]	47.1373	19.93	1	5	5	14	1.35259e+07	296	32.81	9.21729
Q9XZ58	COP9 signalosome complex subunit 5 OS=Drosophila melanogaster GN=CSN5 PE=1 SV=1 - [CSN5_DROME]	47.0127	18.96	1	5	5	14	2.04484e+07	327	37.0594	5.57959
Q9VFF0	CG3731, isoform A OS=Drosophila melanogaster GN=CG3731 PE=2 SV=2 - [Q9VFF0_DROME]	46.7293	23.4	1	8	8	13	1.21922e+07	470	51.8411	5.99854
Q8IRQ5	LP02262p OS=Drosophila melanogaster GN=l(1)G0255 PE=2 SV=1 - [Q8IRQ5_DROME]	46.6675	20.13	2	8	8	15	3.01057e+07	467	50.4279	7.53271
O02195	Eukaryotic translation initiation factor 3 subunit I OS=Drosophila melanogaster GN=Trip1 PE=1 SV=1 - [EIF3I_DROME]	46.4506	34.05	1	8	8	14	3.97731e+07	326	36.1366	5.33838
Q9W1G7	LD21576p OS=Drosophila melanogaster GN=Nap1 PE=2 SV=1 - [Q9W1G7_DROME]	46.2856	25.68	1	8	8	17	4.36936e+07	370	42.7408	4.79248
P02843	Vitellogenin-1 OS=Drosophila melanogaster GN=Yp1 PE=1 SV=1 - [VIT1_DROME]	46.1626	26.42	1	9	9	18	5.21269e+07	439	48.6815	7.69385
Q9XYU1	DNA replication licensing factor Mcm3 OS=Drosophila melanogaster GN=Mcm3 PE=1 SV=1 - [MCM3_DROME]	45.2704	15.02	1	10	10	14	7.10096e+06	819	90.8612	6.40479
P48591	Ribonucleoside-diphosphate reductase large subunit OS=Drosophila melanogaster GN=RnrL PE=1 SV=2 - [RIR1_DROME]	45.0471	4.31	1	3	3	17	4.51835e+06	812	91.9191	7.45947
Q9VV75	AT02348p OS=Drosophila melanogaster GN=CG4169 PE=2 SV=1 - [Q9VV75_DROME]	44.4644	22.73	1	7	7	13	9.06541e+06	440	45.3879	9.43701
P22769	Proteasome subunit alpha type-7-1 OS=Drosophila melanogaster GN=Prosalpha4 PE=1 SV=2 - [PSA71_DROME]	44.4396	24.5	2	6	6	14	2.04148e+07	249	27.9554	8.11865
Q8IP94	Threonyl-tRNA synthetase, isoform B OS=Drosophila melanogaster GN=Aats-thr PE=3 SV=1 - [Q8IP94_DROME]	44.2337	19.57	2	11	11	16	4.81559e+06	690	79.2949	6.90283
Q9VA91	40S ribosomal protein S7 OS=Drosophila melanogaster GN=RpS7 PE=1 SV=1 - [RS7_DROME]	44.0153	44.85	2	9	9	17	1.02272e+08	194	22.1563	9.80322
Q9VQ61	Aspartate aminotransferase OS=Drosophila melanogaster GN=Got2 PE=3 SV=1 - [Q9VQ61_DROME]	43.8522	23.58	2	8	8	15	9.47019e+06	424	47.1555	8.77783
P15348	DNA topoisomerase 2 OS=Drosophila melanogaster GN=Top2 PE=1 SV=1 - [TOP2_DROME]	43.5747	9.74	1	11	11	15	3.93616e+06	1447	164.293	8.22119
Q9VVL7	Dihydrolipoyl dehydrogenase OS=Drosophila melanogaster GN=CG7430 PE=2 SV=1 - [Q9VVL7_DROME]	43.5667	25.99	1	9	9	14	1.39875e+07	504	53.0515	6.87354
Q9VWT1	GH22474p OS=Drosophila melanogaster GN=Aats-his PE=2 SV=1 - [Q9VWT1_DROME]	43.4758	16.86	3	7	7	14	5.26808e+06	522	57.7102	6.94678
P26270	26S proteasome non-ATPase regulatory subunit 7 OS=Drosophila melanogaster GN=Rpn8 PE=1 SV=6 - [PSMD7_DROME]	42.8094	26.33	1	7	7	15	1.33294e+07	338	38.0655	6.7124
Q7KT11	CG9331, isoform B OS=Drosophila melanogaster GN=CG9331 PE=3 SV=1 - [Q7KT11_DROME]	42.7573	39.26	5	8	8	13	4.74944e+06	326	35.6908	6.7417
P91938-2	Isoform A of Thioredoxin reductase 1, mitochondrial OS=Drosophila melanogaster GN=Trxr-1 - [TRXR1_DROME]	42.5694	19.76	4	8	8	13	2.07503e+07	491	53.1895	6.32861
Q24208	Eukaryotic translation initiation factor 2 subunit 3 OS=Drosophila melanogaster GN=eIF-2gamma PE=2 SV=1 - [IF2G_DROME]	42.2341	27.37	3	10	10	15	1.13768e+07	475	51.4525	8.73389
E1JIR4	Na pump alpha subunit, isoform I OS=Drosophila melanogaster GN=Atpalpha PE=3 SV=1 - [E1JIR4_DROME]	42.091	11.28	8	8	8	12	4.56942e+06	1002	111.089	5.49072
A1Z8U4	T-complex chaperonin 5, isoform B OS=Drosophila melanogaster GN=Cct5 PE=3 SV=1 - [A1Z8U4_DROME]	41.8596	17.97	2	7	8	15	1.30601e+07	512	55.7561	6.12549
Q9W1L1	Mitochondrial ribosomal protein L43 OS=Drosophila melanogaster GN=mRpL43 PE=2 SV=1 - [Q9W1L1_DROME]	41.8364	35.42	1	5	5	11	2.27491e+07	192	21.9642	9.26123
P48159	60S ribosomal protein L23 OS=Drosophila melanogaster GN=RpL23 PE=1 SV=2 - [RL23_DROME]	41.5817	45.71	1	5	5	13	2.57797e+07	140	14.927	10.8286
Q9VTP4	60S ribosomal protein L10a-2 OS=Drosophila melanogaster GN=RpL10Ab PE=1 SV=2 - [R10AB_DROME]	40.9887	29.95	1	6	6	13	5.63918e+07	217	24.2581	9.86182
Q7KRU8	Ferritin 1 heavy chain homologue, isoform A OS=Drosophila melanogaster GN=Fer1HCH PE=2 SV=1 - [Q7KRU8_DROME]	40.7481	27.8	2	4	4	11	3.40316e+07	205	23.1308	5.87158
Q9V436	26S proteasome regulatory complex subunit p30 OS=Drosophila melanogaster GN=Rpn12 PE=2 SV=1 - [Q9V436_DROME]	40.6729	25.38	1	5	5	12	2.01103e+07	264	30.2058	6.06201
Q9VN25	Eukaryotic translation initiation factor 3 subunit A OS=Drosophila melanogaster GN=eIF3-S10 PE=1 SV=1 - [EIF3A_DROME]	40.2392	11.75	2	13	13	16	1.29373e+07	1140	133.798	9.01221
Q9VX36	CG5703 OS=Drosophila melanogaster GN=CG5703 PE=3 SV=1 - [Q9VX36_DROME]	39.9489	30.99	1	6	6	15	1.24632e+07	242	26.7645	6.90283
Q9NJH0	Elongation factor 1-gamma OS=Drosophila melanogaster GN=Ef1gamma PE=2 SV=2 - [EF1G_DROME]	39.8823	24.13	1	9	9	13	2.10683e+07	431	48.9368	7.04932
Q9VL68	CG4598, isoform A OS=Drosophila melanogaster GN=CG4598 PE=2 SV=2 - [Q9VL68_DROME]	39.5586	24.91	1	7	7	13	3.22216e+07	281	30.9742	9.23193
Q01637	Uridine 5'-monophosphate synthase OS=Drosophila melanogaster GN=r-l PE=2 SV=2 - [UMPS_DROME]	39.474	16.23	1	6	6	13	8.85864e+06	493	53.3859	7.25439
P02518	Heat shock protein 27 OS=Drosophila melanogaster GN=Hsp27 PE=1 SV=2 - [HSP27_DROME]	39.1843	26.29	1	4	4	11	4.17406e+07	213	23.602	7.44482
P48149	40S ribosomal protein S15Aa OS=Drosophila melanogaster GN=RpS15Aa PE=1 SV=2 - [RS15A_DROME]	39.0111	48.46	2	7	7	14	6.81481e+07	130	14.7619	9.80322
F0JAN1	Ade5, isoform B OS=Drosophila melanogaster GN=ade5 PE=2 SV=1 - [F0JAN1_DROME]	38.7242	18.69	3	6	6	11	7.99869e+06	428	47.1376	8.38232
P46415	Alcohol dehydrogenase class-3 OS=Drosophila melanogaster GN=Fdh PE=1 SV=3 - [ADHX_DROME]	38.6878	19.53	1	6	6	11	8.73959e+06	379	40.3636	6.7124
Q9VXI1	CG9914 OS=Drosophila melanogaster GN=CG9914 PE=2 SV=2 - [Q9VXI1_DROME]	38.5761	27.3	1	7	7	13	4.39023e+06	315	34.7643	7.81104
Q9V3U6	26-29kD-proteinase OS=Drosophila melanogaster GN=26-29-p PE=2 SV=1 - [Q9V3U6_DROME]	38.4267	11.11	1	5	5	11	3.412e+07	549	62.0903	6.7417
P48461	Serine/threonine-protein phosphatase alpha-1 isoform OS=Drosophila melanogaster GN=Pp1alpha-96A PE=1 SV=1 - [PP11_DROME]	38.149	19.27	4	5	5	11	5.29119e+06	327	37.3457	6.66846
P46150-5	Isoform C of Moesin/ezrin/radixin homolog 1 OS=Drosophila melanogaster GN=Moe - [MOEH_DROME]	38.0811	13.87	7	7	7	14	1.9601e+07	512	60.5608	5.79541
M9NF14	IGF-II mRNA-binding protein, isoform L OS=Drosophila melanogaster GN=Imp PE=4 SV=1 - [M9NF14_DROME]	38.0092	13.01	5	6	6	12	7.49363e+06	638	69.8684	8.14795
P22700	Calcium-transporting ATPase sarcoplasmic/endoplasmic reticulum type OS=Drosophila melanogaster GN=Ca-P60A PE=1 SV=2 - [ATC1_DROME]	37.4772	12.35	2	10	10	14	1.06398e+07	1020	111.63	5.41455
P48601	26S protease regulatory subunit 4 OS=Drosophila melanogaster GN=Rpt2 PE=1 SV=2 - [PRS4_DROME]	37.3144	24.37	1	7	8	13	2.30906e+07	439	49.2927	6.58057
P38979-2	Isoform A of 40S ribosomal protein SA OS=Drosophila melanogaster GN=sta - [RSSA_DROME]	36.9107	22.59	2	6	6	12	4.73131e+07	270	30.2094	4.86865
Q9VRP2	CG10576 OS=Drosophila melanogaster GN=CG10576 PE=4 SV=1 - [Q9VRP2_DROME]	36.8641	17.39	1	5	5	10	8.22521e+06	391	42.7462	7.10791
P08182-3	Isoform B of Casein kinase II subunit beta OS=Drosophila melanogaster GN=CkIIbeta - [CSK2B_DROME]	36.6239	26.98	5	5	5	13	2.63478e+07	215	24.8129	5.5542
Q9VAY2	Glycoprotein 93 OS=Drosophila melanogaster GN=Gp93 PE=2 SV=1 - [Q9VAY2_DROME]	36.4687	11.18	1	7	8	13	1.75324e+07	787	90.1825	5.021
Q03334	40S ribosomal protein S13 OS=Drosophila melanogaster GN=RpS13 PE=1 SV=3 - [RS13_DROME]	36.1834	23.18	1	3	3	11	5.52821e+07	151	17.1676	10.5503
Q8SYG2	COP9 signalosome complex subunit 3 OS=Drosophila melanogaster GN=CSN3 PE=2 SV=2 - [CSN3_DROME]	35.9728	14.16	1	5	5	10	7.13313e+06	445	50.6708	6.25244
P25007	Peptidyl-prolyl cis-trans isomerase OS=Drosophila melanogaster GN=Cyp1 PE=1 SV=2 - [PPIA_DROME]	35.1212	16.74	2	3	3	10	2.76948e+06	227	24.6505	9.21729
Q9VIE8	Aconitase, isoform B OS=Drosophila melanogaster GN=Acon PE=2 SV=2 - [Q9VIE8_DROME]	35.0959	10.42	1	6	6	11	3.9357e+06	787	85.3446	8.23584
Q59E30	Failed axon connections, isoform C OS=Drosophila melanogaster GN=fax PE=4 SV=1 - [Q59E30_DROME]	34.8578	21.45	6	8	8	13	1.68795e+07	415	46.6146	5.24951
Q95083	Proteasome subunit alpha type-5 OS=Drosophila melanogaster GN=Prosalpha5 PE=2 SV=2 - [PSA5_DROME]	34.6143	25.41	1	5	5	12	1.18383e+07	244	26.8664	4.98291
B7Z0X1	Serine hydroxymethyltransferase OS=Drosophila melanogaster GN=CG3011 PE=3 SV=1 - [B7Z0X1_DROME]	34.449	18.2	2	7	7	11	6.19531e+06	467	50.9524	7.72314
P55035	26S proteasome non-ATPase regulatory subunit 4 OS=Drosophila melanogaster GN=Rpn10 PE=1 SV=2 - [PSMD4_DROME]	34.2507	16.41	1	6	6	11	3.68159e+07	396	42.5921	4.83057
Q9VHL2	LD47396p OS=Drosophila melanogaster GN=Tcp-1eta PE=2 SV=2 - [Q9VHL2_DROME]	34.197	19.85	1	8	8	11	1.13411e+07	544	59.3488	6.34131
Q9VQR2	CG8844 protein OS=Drosophila melanogaster GN=Pdsw PE=2 SV=1 - [Q9VQR2_DROME]	34.1351	28.3	1	5	5	12	8.81306e+06	159	18.9062	7.00537
Q9VXQ5	GH13725p OS=Drosophila melanogaster GN=Tcp-1zeta PE=2 SV=1 - [Q9VXQ5_DROME]	33.6612	15.2	1	8	8	13	1.30927e+07	533	58.2096	6.62451
Q8SXQ1	CG9629 OS=Drosophila melanogaster GN=CG9629 PE=2 SV=1 - [Q8SXQ1_DROME]	33.636	10.19	1	4	4	11	1.00154e+07	540	58.2782	7.44482
Q9VCY3	COP9 signalosome complex subunit 6 OS=Drosophila melanogaster GN=CSN6 PE=1 SV=1 - [CSN6_DROME]	33.6204	10.56	1	3	3	9	2.02313e+07	341	38.2811	5.8208
Q9VA83	AT19513p OS=Drosophila melanogaster GN=Fer2LCH PE=2 SV=1 - [Q9VA83_DROME]	33.0927	20.26	1	5	5	12	3.08333e+07	227	25.2266	6.34131
Q9VAY9	GH07821p OS=Drosophila melanogaster GN=mRpS22 PE=2 SV=1 - [Q9VAY9_DROME]	33.0543	15.01	1	5	5	12	5.12347e+06	393	45.7588	7.73779
Q9V3Z4	GH11341p OS=Drosophila melanogaster GN=Rpn5 PE=2 SV=1 - [Q9V3Z4_DROME]	32.7591	19.12	1	9	9	13	1.72689e+07	502	57.7106	5.79541
Q9V3G1	60S ribosomal protein L8 OS=Drosophila melanogaster GN=RpL8 PE=1 SV=1 - [RL8_DROME]	32.7339	25	1	6	6	12	7.35052e+07	256	27.8752	11.1509
A5XCL5	LD36265p (Fragment) OS=Drosophila melanogaster GN=UGP PE=2 SV=1 - [A5XCL5_DROME]	32.4874	14.87	4	6	6	12	1.18868e+07	511	57.7881	7.40088
Q24186	40S ribosomal protein S5a OS=Drosophila melanogaster GN=RpS5a PE=1 SV=1 - [RS5A_DROME]	32.4247	16.23	1	1	3	9	1.4376e+06	228	25.4183	8.63135
P40304	Proteasome subunit beta type-1 OS=Drosophila melanogaster GN=Prosbeta6 PE=2 SV=2 - [PSB1_DROME]	32.3011	20.85	1	3	3	10	1.91914e+07	235	25.826	6.53662
Q9W0I2	CG9134, isoform A OS=Drosophila melanogaster GN=CG9134 PE=2 SV=1 - [Q9W0I2_DROME]	32.2295	19.15	2	2	2	8	1.80203e+06	188	21.8335	5.56689
Q9W1G0	Probable transaldolase OS=Drosophila melanogaster GN=Tal PE=2 SV=2 - [TALDO_DROME]	32.1805	16.62	1	3	4	8	4.12635e+06	331	36.7105	7.7085
Q9V3G7	26S proteasome non-ATPase regulatory subunit 6 OS=Drosophila melanogaster GN=Rpn7 PE=2 SV=1 - [PSMD6_DROME]	31.9543	22.11	1	7	7	10	2.69248e+07	389	45.3525	6.48096
Q9VVC5	Neural conserved at 73EF, isoform A OS=Drosophila melanogaster GN=Nc73EF PE=2 SV=2 - [Q9VVC5_DROME]	31.9458	11.61	3	9	9	12	2.98807e+06	1008	112.514	6.88818
Q8IP62	Mitochondrial ribosomal protein S23 OS=Drosophila melanogaster GN=mRpS23 PE=4 SV=1 - [Q8IP62_DROME]	31.49	34.92	1	5	5	10	1.71565e+07	189	21.5021	5.73193
P54385-2	Isoform C of Glutamate dehydrogenase, mitochondrial OS=Drosophila melanogaster GN=Gdh - [DHE3_DROME]	31.3658	17.49	3	8	8	11	1.7179e+07	549	61.0432	8.39697
Q7KN97	Pyruvate carboxylase OS=Drosophila melanogaster GN=CG1516 PE=2 SV=1 - [Q7KN97_DROME]	31.2419	8.72	2	8	8	11	5.22086e+06	1181	130.781	6.81494
Q9VFT4	AT27578p OS=Drosophila melanogaster GN=rin PE=1 SV=1 - [Q9VFT4_DROME]	31.0079	7.83	1	4	4	9	9.42867e+06	690	74.898	7.37158
Q7K2G1	Proteasomal ubiquitin receptor ADRM1 homolog OS=Drosophila melanogaster GN=Rpn13 PE=1 SV=1 - [ADRM1_DROME]	30.8749	9.77	2	3	3	10	1.16816e+07	389	41.9864	5.64307
Q9W414	Regulatory particle triple-A ATPase 4 OS=Drosophila melanogaster GN=Rpt4 PE=3 SV=3 - [Q9W414_DROME]	30.7342	19.9	1	7	7	11	2.27903e+07	397	44.8828	8.07471
Q7KM15	Beta NAC homolog OS=Drosophila melanogaster GN=bic PE=2 SV=1 - [Q7KM15_DROME]	30.5752	27.81	1	3	3	10	3.76463e+07	169	17.7273	7.48877
Q0E924	LD46344p OS=Drosophila melanogaster GN=Phb2 PE=2 SV=2 - [Q0E924_DROME]	30.5234	25.42	3	6	6	10	1.9674e+07	299	33.0457	9.53955
Q9VVU2	RE17611p OS=Drosophila melanogaster GN=RpL26 PE=1 SV=1 - [Q9VVU2_DROME]	30.1228	31.54	1	5	5	10	7.59636e+07	149	17.2705	10.9458
A1ZBB4	CG30122, isoform B OS=Drosophila melanogaster GN=CG30122 PE=4 SV=1 - [A1ZBB4_DROME]	29.9315	8.26	3	6	6	10	3.96166e+06	1271	140.41	5.0083
Q9VJG0	Aminopeptidase P OS=Drosophila melanogaster GN=ApepP PE=2 SV=1 - [Q9VJG0_DROME]	29.6745	14.52	1	7	7	11	6.84495e+06	613	68.463	5.94775
Q7KLV9	26S proteasome non-ATPase regulatory subunit 11 OS=Drosophila melanogaster GN=Rpn6 PE=1 SV=1 - [PSD11_DROME]	29.5906	20.62	2	8	8	11	1.82698e+07	422	47.2337	5.88428
Q9VNX4	Delta-1-Pyrroline-5-carboxylate dehydrogenase 1, isoform A OS=Drosophila melanogaster GN=P5CDh1 PE=2 SV=1 - [Q9VNX4_DROME]	29.2649	14.63	1	6	6	9	6.12889e+06	574	63.6263	8.22119
Q9XYN7	Proteasome subunit beta type-3 OS=Drosophila melanogaster GN=Prosbeta3 PE=2 SV=1 - [PSB3_DROME]	29.2005	20	1	4	4	9	7.56282e+06	205	23.2184	5.43994
Q01989-3	Isoform I of Myosin heavy chain 95F OS=Drosophila melanogaster GN=jar - [MYS9_DROME]	29.1835	4.01	3	3	3	8	1.64885e+06	1073	122.316	8.39697
P31009	40S ribosomal protein S2 OS=Drosophila melanogaster GN=RpS2 PE=1 SV=2 - [RS2_DROME]	28.9402	26.97	1	6	6	10	1.46872e+07	267	28.8814	10.1548
O76511	Thymidylate synthase OS=Drosophila melanogaster GN=Ts PE=1 SV=2 - [TYSY_DROME]	28.7897	19	1	5	5	9	1.41579e+06	321	36.6333	6.60986
P08570	60S acidic ribosomal protein P1 OS=Drosophila melanogaster GN=RpLP1 PE=1 SV=2 - [RLA1_DROME]	28.7547	50	1	3	3	7	9.38168e+06	112	11.5058	4.41162
Q9VYG8	CG15717 OS=Drosophila melanogaster GN=CG15717 PE=2 SV=1 - [Q9VYG8_DROME]	28.7494	30.56	1	6	6	10	8.32799e+06	252	27.7493	6.29053
Q9XZJ4	Proteasome subunit alpha type-6 OS=Drosophila melanogaster GN=Prosalpha1 PE=1 SV=2 - [PSA6_DROME]	28.4851	30.33	1	7	7	12	1.67502e+07	244	27.1448	7.66455
Q8IPM3	Growl, isoform B (Fragment) OS=Drosophila melanogaster GN=lost PE=4 SV=2 - [Q8IPM3_DROME]	28.4524	11.21	2	5	5	9	3.543e+06	535	58.925	9.31982
M9PI17	CG6084, isoform D OS=Drosophila melanogaster GN=CG6084 PE=4 SV=1 - [M9PI17_DROME]	28.4504	29.75	4	8	8	11	2.29814e+07	316	35.8727	6.80029
Q07152	Inosine-5'-monophosphate dehydrogenase OS=Drosophila melanogaster GN=ras PE=1 SV=1 - [IMDH_DROME]	28.4271	12.29	2	5	5	9	2.46136e+07	537	57.7924	7.43018
Q9VK69	T-complex protein 1 subunit delta OS=Drosophila melanogaster GN=CG5525 PE=2 SV=1 - [Q9VK69_DROME]	28.2721	10.69	1	4	5	11	4.32331e+06	533	57.0802	7.56201
Q24319	Dolichyl-diphosphooligosaccharide--protein glycosyltransferase 48 kDa subunit OS=Drosophila melanogaster GN=Ost48 PE=2 SV=2 - [OST48_DROME]	28.1438	24.94	1	8	8	10	1.18278e+07	449	49.9495	5.59229
P18053	Proteasome subunit alpha type-4 OS=Drosophila melanogaster GN=Prosalpha3 PE=1 SV=2 - [PSA4_DROME]	28.0586	18.94	2	4	4	8	1.12766e+07	264	29.3929	7.15186
P23696	Serine/threonine-protein phosphatase PP2A OS=Drosophila melanogaster GN=mts PE=2 SV=1 - [PP2A_DROME]	27.6344	12.94	1	3	3	9	5.22816e+06	309	35.4463	5.33838
A1ZBE9	CG15100 OS=Drosophila melanogaster GN=CG15100 PE=3 SV=1 - [A1ZBE9_DROME]	27.6154	6.95	1	5	5	8	2.3899e+06	1022	112.414	8.51416
O62530	AP-50, isoform A OS=Drosophila melanogaster GN=AP-2mu PE=2 SV=1 - [O62530_DROME]	27.5551	12.59	1	4	4	8	2.56954e+06	437	49.8242	9.48096
Q9VWS1	CG6617 OS=Drosophila melanogaster GN=CG6617 PE=2 SV=1 - [Q9VWS1_DROME]	27.4857	36.44	1	7	7	9	1.20911e+07	225	25.9804	4.97021
Q9VTZ4	LD02044p OS=Drosophila melanogaster GN=nst PE=2 SV=1 - [Q9VTZ4_DROME]	27.3966	14.57	1	6	6	9	6.43047e+06	549	60.5431	6.29053
O62621	Coatomer subunit beta' OS=Drosophila melanogaster GN=beta'Cop PE=2 SV=2 - [COPB2_DROME]	27.3014	15.54	1	11	11	11	7.77637e+06	914	102.648	5.26221
Q0E993	Valyl-tRNA synthetase, isoform A OS=Drosophila melanogaster GN=Aats-val PE=3 SV=1 - [Q0E993_DROME]	27.1901	7.34	1	6	6	9	4.023e+06	1049	118.179	6.65381
P48809	Heterogeneous nuclear ribonucleoprotein 27C OS=Drosophila melanogaster GN=Hrb27C PE=1 SV=2 - [RB27C_DROME]	27.1458	11.16	1	3	3	7	9.23741e+06	421	44.7417	6.80029
P09491	Tropomyosin-2 OS=Drosophila melanogaster GN=Tm2 PE=2 SV=1 - [TPM2_DROME]	27.0664	9.51	2	2	2	7	2.60101e+06	284	32.9606	4.83057
Q7KN94	Walrus, isoform A OS=Drosophila melanogaster GN=wal PE=2 SV=1 - [Q7KN94_DROME]	27.064	17.27	1	4	4	8	5.56031e+06	330	34.1602	8.32373
Q03427	Lamin-C OS=Drosophila melanogaster GN=LamC PE=1 SV=2 - [LAMC_DROME]	26.8759	12.56	1	6	6	9	3.09836e+06	621	69.8177	6.84424
Q9W1B9	RE28824p OS=Drosophila melanogaster GN=RpL12 PE=1 SV=1 - [Q9W1B9_DROME]	26.8733	40	1	5	5	9	5.62257e+07	165	17.6625	9.0708
O44081	H/ACA ribonucleoprotein complex subunit 4 OS=Drosophila melanogaster GN=Nop60B PE=1 SV=1 - [DKC1_DROME]	26.8319	9.84	2	4	4	8	7.11746e+06	508	56.7949	9.27588
Q9W0A8	FI01658p OS=Drosophila melanogaster GN=RpL23A PE=1 SV=1 - [Q9W0A8_DROME]	26.6694	19.49	1	6	6	8	3.72388e+07	277	29.4451	10.9458
Q9W1H8	GH13256p OS=Drosophila melanogaster GN=Thiolase PE=2 SV=1 - [Q9W1H8_DROME]	26.5182	12.58	1	5	5	9	1.61324e+07	469	50.6094	9.14404
Q9VKX2	Malate dehydrogenase OS=Drosophila melanogaster GN=Mdh1 PE=2 SV=2 - [Q9VKX2_DROME]	26.495	22.55	1	5	5	9	1.43338e+07	337	36.0356	7.38623
Q9VFE4	40S ribosomal protein S5b OS=Drosophila melanogaster GN=RpS5b PE=2 SV=1 - [RS5B_DROME]	26.3102	16.09	1	1	3	7	2.08356e+06	230	25.7003	8.54346
Q9W2X6	Lethal (1) G0230, isoform A OS=Drosophila melanogaster GN=l(1)G0230 PE=2 SV=1 - [Q9W2X6_DROME]	26.2469	28.03	1	4	4	9	1.53084e+07	157	16.7177	5.98584
Q9VCZ8	Probable prefoldin subunit 5 OS=Drosophila melanogaster GN=CG7048 PE=2 SV=1 - [PFD5_DROME]	26.2418	38.1	1	5	5	9	1.07482e+07	168	19.0657	7.32764
O61492-4	Isoform D of Flotillin-2 OS=Drosophila melanogaster GN=Flo-2 - [FLOT2_DROME]	26.2163	23.13	8	5	5	8	5.03978e+06	281	30.9893	5.68115
Q9VGQ1	CG5214 OS=Drosophila melanogaster GN=CG5214 PE=2 SV=1 - [Q9VGQ1_DROME]	26.1416	8.12	1	4	4	10	4.99821e+07	468	49.8923	9.46631
Q9W5R8	60S ribosomal protein L5 OS=Drosophila melanogaster GN=RpL5 PE=1 SV=2 - [RL5_DROME]	26.0265	25.08	1	7	7	11	2.99531e+07	299	34.0158	9.77393
P40797	Protein peanut OS=Drosophila melanogaster GN=pnut PE=1 SV=2 - [PNUT_DROME]	25.9517	10.02	1	4	4	9	4.1618e+06	539	60.106	8.74854
Q9VN44	FI07923p OS=Drosophila melanogaster GN=Karybeta3 PE=2 SV=1 - [Q9VN44_DROME]	25.882	5.16	1	4	4	9	1.74928e+06	1105	123.482	4.729
Q9VPF6	FI06804p OS=Drosophila melanogaster GN=mRpL15 PE=2 SV=1 - [Q9VPF6_DROME]	25.6915	17.83	1	4	4	8	9.55094e+06	286	32.6139	9.36377
P25843	Profilin OS=Drosophila melanogaster GN=chic PE=1 SV=1 - [PROF_DROME]	25.5827	34.13	1	2	2	5	9.20774e+06	126	13.7148	5.41455
P41094	40S ribosomal protein S18 OS=Drosophila melanogaster GN=RpS18 PE=1 SV=1 - [RS18_DROME]	25.4887	38.82	1	6	6	10	3.89413e+07	152	17.6006	10.4771
Q9VCM8	CG4408 OS=Drosophila melanogaster GN=CG4408 PE=3 SV=2 - [Q9VCM8_DROME]	25.3658	14.41	1	5	5	8	4.1984e+06	479	54.3512	6.32861
P19109-3	Isoform D of ATP-dependent RNA helicase p62 OS=Drosophila melanogaster GN=Rm62 - [DDX17_DROME]	25.3335	13.57	4	6	6	9	6.03711e+06	575	62.4355	9.56885
E2QCF1	ATP citrate lyase, isoform F OS=Drosophila melanogaster GN=ATPCL PE=4 SV=1 - [E2QCF1_DROME]	25.1122	8.58	2	7	7	9	3.65964e+06	1095	119.672	7.12256
Q9VMI5	CG9135 protein OS=Drosophila melanogaster GN=CG9135 PE=2 SV=1 - [Q9VMI5_DROME]	25.0404	11.7	1	4	4	7	1.07557e+07	487	53.426	7.18115
Q7KTK9	CG5261, isoform A OS=Drosophila melanogaster GN=CG5261 PE=3 SV=1 - [Q7KTK9_DROME]	24.9838	14.49	5	6	6	9	3.33946e+07	421	44.0901	8.82178
Q7KTW5	CG9391, isoform A OS=Drosophila melanogaster GN=CG9391 PE=2 SV=1 - [Q7KTW5_DROME]	24.8233	20.86	1	4	4	7	1.97227e+06	278	30.6065	5.93506
Q9V3J8	Protein will die slowly OS=Drosophila melanogaster GN=wds PE=1 SV=1 - [WDS_DROME]	24.8078	18.84	1	5	5	8	3.14324e+06	361	39.0167	8.57275
Q9VS34	60S ribosomal protein L18 OS=Drosophila melanogaster GN=RpL18 PE=1 SV=1 - [RL18_DROME]	24.7537	19.68	1	3	3	9	1.20876e+07	188	21.6511	11.5317
Q27237	Protein tumorous imaginal discs, mitochondrial OS=Drosophila melanogaster GN=l(2)tid PE=1 SV=2 - [TID_DROME]	24.7068	7.69	3	3	3	8	1.25596e+06	520	56.1019	9.1001
Q95029-2	Isoform A of Cathepsin L OS=Drosophila melanogaster GN=Cp1 - [CATL_DROME]	24.6893	17.3	2	4	4	8	4.03999e+06	341	37.9466	6.58057
P52295	Importin subunit alpha OS=Drosophila melanogaster GN=Pen PE=1 SV=2 - [IMA_DROME]	24.4634	9.96	1	4	4	7	4.5044e+06	522	57.7857	5.35107
Q8T0Q4	GH13992p OS=Drosophila melanogaster GN=shrb PE=2 SV=1 - [Q8T0Q4_DROME]	24.2538	19.91	1	3	3	7	7.21943e+06	226	25.4278	4.80518
Q9VGW7	Arginine methyltransferase 1 OS=Drosophila melanogaster GN=Art1 PE=2 SV=1 - [Q9VGW7_DROME]	24.1461	23.67	1	6	6	9	7.53796e+06	376	42.7779	5.14795
Q7K012	Brahma associated protein 55kD OS=Drosophila melanogaster GN=Bap55 PE=2 SV=1 - [Q7K012_DROME]	24.1275	17.65	1	6	6	8	9.66773e+06	425	47.2894	5.49072
P21187	Polyadenylate-binding protein OS=Drosophila melanogaster GN=pAbp PE=1 SV=3 - [PABP_DROME]	23.8799	11.36	1	6	6	9	1.43704e+07	634	69.8816	9.30518
Q9VLM8	Alanine--tRNA ligase, cytoplasmic OS=Drosophila melanogaster GN=Aats-ala PE=2 SV=1 - [SYAC_DROME]	23.8225	4.45	1	3	3	7	3.51696e+06	966	107.674	6.12549
Q7KMM4	BcDNA.GH04962 OS=Drosophila melanogaster GN=BcDNA.GH04962 PE=2 SV=1 - [Q7KMM4_DROME]	23.7786	5.74	1	3	3	6	1.14352e+07	924	105.665	6.50732
Q9VHI8	CG11980, isoform A OS=Drosophila melanogaster GN=CG11980 PE=4 SV=2 - [Q9VHI8_DROME]	23.6961	14.2	3	4	4	9	8.6732e+06	345	39.1939	6.53662
Q9VJ86	Bicoid stability factor OS=Drosophila melanogaster GN=bsf PE=2 SV=2 - [Q9VJ86_DROME]	23.6914	3.97	1	5	5	9	1.93874e+06	1412	157.167	7.13721
O46067	CG2918, isoform A OS=Drosophila melanogaster GN=EG:25E8.1 PE=2 SV=1 - [O46067_DROME]	23.6836	5.85	1	3	4	8	3.5673e+07	923	103.382	5.12256
Q9V405	26S proteasome regulatory complex subunit p48A OS=Drosophila melanogaster GN=Rpt3 PE=2 SV=1 - [Q9V405_DROME]	23.5362	13.32	1	5	5	9	9.94047e+06	413	46.9692	5.37646
P32100	60S ribosomal protein L7 OS=Drosophila melanogaster GN=RpL7 PE=1 SV=2 - [RL7_DROME]	23.4725	19.84	1	5	5	8	8.14648e+06	252	29.5336	10.8872
Q9VZ49	Poly(U)-specific endoribonuclease homolog OS=Drosophila melanogaster GN=CG2145 PE=1 SV=1 - [ENDOU_DROME]	23.4593	7.26	1	3	3	6	1.64126e+06	592	63.557	8.88037
Q8SXF0	Mitochondrial ribosomal protein S9 OS=Drosophila melanogaster GN=mRpS9 PE=2 SV=1 - [Q8SXF0_DROME]	23.3845	12.66	1	4	4	7	8.35727e+06	395	45.2401	8.90967
Q7KN75	Dodeca-satellite-binding protein 1, isoform A OS=Drosophila melanogaster GN=Dp1 PE=2 SV=1 - [Q7KN75_DROME]	23.3297	6.99	1	7	7	8	6.37316e+06	1301	144.188	6.20166
Q23997	Chitinase-like protein CG5210 OS=Drosophila melanogaster GN=CG5210 PE=1 SV=2 - [C5210_DROME]	23.2556	5.53	1	2	2	9	4.36418e+06	452	50.3231	7.89893
Q9VHY6	CG2943 OS=Drosophila melanogaster GN=CG2943 PE=2 SV=1 - [Q9VHY6_DROME]	23.1968	7.54	1	6	6	9	5.42845e+06	915	100.852	8.1333
O18333	GH01619p OS=Drosophila melanogaster GN=Rab2 PE=2 SV=1 - [O18333_DROME]	23.1702	26.29	1	4	4	7	4.33831e+06	213	23.5458	6.39209
Q7K485	CathD OS=Drosophila melanogaster GN=cathD PE=2 SV=1 - [Q7K485_DROME]	23.0658	18.88	1	5	5	7	5.79147e+06	392	42.4456	6.31592
P54357	Myosin-2 essential light chain OS=Drosophila melanogaster GN=Mlc-c PE=1 SV=1 - [MLC2_DROME]	22.9503	39.46	2	5	5	9	1.49231e+07	147	16.6031	4.58936
P17210	Kinesin heavy chain OS=Drosophila melanogaster GN=Khc PE=1 SV=2 - [KINH_DROME]	22.9494	11.08	1	8	8	8	3.24384e+06	975	110.331	5.77002
Q9VVU1	CG3902 OS=Drosophila melanogaster GN=CG3902-RA PE=2 SV=1 - [Q9VVU1_DROME]	22.8525	12.32	1	4	4	9	6.40994e+06	414	45.337	6.7124
Q9VYQ8	Ubiquitin carboxyl-terminal hydrolase 7 OS=Drosophila melanogaster GN=Usp7 PE=1 SV=1 - [UBP7_DROME]	22.7715	6.2	1	5	5	7	1.62051e+06	1129	130.365	6.03662
P55841	60S ribosomal protein L14 OS=Drosophila melanogaster GN=RpL14 PE=1 SV=1 - [RL14_DROME]	22.6921	31.33	1	6	6	9	4.46373e+07	166	19.1618	11.1802
P06754-1	Isoform D of Tropomyosin-1, isoforms 9A/A/B OS=Drosophila melanogaster GN=Tm1 - [TPM1_DROME]	22.6218	18.95	11	4	5	8	2.9252e+06	285	32.7258	4.729
P16378	G protein alpha o subunit OS=Drosophila melanogaster GN=Galphao PE=1 SV=1 - [GNAO_DROME]	22.3924	12.99	7	4	4	9	3.69655e+06	354	40.4501	5.52881
Q7JVI3	Eukaryotic translation initiation factor 3 subunit M OS=Drosophila melanogaster GN=Tango7 PE=2 SV=1 - [EIF3M_DROME]	22.3616	18.6	1	6	6	7	9.93522e+06	387	44.0586	5.70654
P17704	40S ribosomal protein S17 OS=Drosophila melanogaster GN=RpS17 PE=1 SV=2 - [RS17_DROME]	22.275	21.37	1	2	2	8	1.7036e+07	131	15.2752	9.93506
Q9V438	Calcium-binding protein 1 OS=Drosophila melanogaster GN=CaBP1 PE=2 SV=1 - [Q9V438_DROME]	22.0053	15.47	1	6	6	8	2.15826e+07	433	46.7227	5.69385
Q9VXY3	CG5599 OS=Drosophila melanogaster GN=CG5599 PE=2 SV=1 - [Q9VXY3_DROME]	21.9706	8.01	1	4	4	9	9.98263e+06	462	50.0417	6.60986
Q9VWG3	40S ribosomal protein S10b OS=Drosophila melanogaster GN=RpS10b PE=1 SV=2 - [RS10B_DROME]	21.8264	23.75	2	3	3	8	1.4507e+07	160	17.8673	9.80322
Q9VHA1	Spermidine synthase, isoform A OS=Drosophila melanogaster GN=SpdS PE=3 SV=1 - [Q9VHA1_DROME]	21.7706	22.3	2	5	5	8	9.36459e+06	287	32.3141	5.78271
A1Z7S0	Receptor mediated endocytosis 8 OS=Drosophila melanogaster GN=Rme-8 PE=4 SV=1 - [A1Z7S0_DROME]	21.5471	2.53	1	5	5	8	1.32533e+06	2408	272.376	7.04932
P02517	Heat shock protein 26 OS=Drosophila melanogaster GN=Hsp26 PE=1 SV=2 - [HSP26_DROME]	21.4751	30.77	1	5	5	7	4.09455e+07	208	22.9798	7.56201
P36179	Serine/threonine-protein phosphatase PP2A 65 kDa regulatory subunit OS=Drosophila melanogaster GN=Pp2A-29B PE=2 SV=4 - [2AAA_DROME]	21.46	13.03	2	5	5	8	3.34333e+06	591	65.3823	5.04639
Q7K0L4	WD repeat-containing protein 26 homolog OS=Drosophila melanogaster GN=CG7611 PE=1 SV=1 - [WDR26_DROME]	21.4257	9.52	1	5	5	8	3.02242e+06	630	69.5729	5.63037
Q9VEJ0	Peroxiredoxin 5037 OS=Drosophila melanogaster GN=Prx3 PE=2 SV=2 - [Q9VEJ0_DROME]	21.3283	24.36	1	6	6	8	2.61053e+07	234	26.3628	7.48877
Q9V3Q4	GH25379p OS=Drosophila melanogaster GN=Jafrac2 PE=2 SV=1 - [Q9V3Q4_DROME]	21.2559	22.31	1	4	4	7	1.13561e+07	242	26.7269	6.80029
Q7K4B2	CG7845 OS=Drosophila melanogaster GN=CG7845 PE=2 SV=1 - [Q7K4B2_DROME]	21.173	10.74	1	3	3	7	2.50536e+06	419	46.6453	6.55127
Q24253	Beta adaptin OS=Drosophila melanogaster GN=AP-1-2beta PE=2 SV=1 - [Q24253_DROME]	21.132	3.8	1	3	3	7	4.42308e+06	921	101.115	5.10986
Q9U3Z7	NHP2-like protein 1 homolog OS=Drosophila melanogaster GN=hoip PE=2 SV=1 - [NH2L1_DROME]	20.9723	36.22	1	3	3	6	1.88215e+07	127	13.8744	7.09326
O76932	Serine/threonine-protein phosphatase 4 catalytic subunit OS=Drosophila melanogaster GN=Pp4-19C PE=2 SV=1 - [PP4C_DROME]	20.759	13.03	1	3	3	7	2.92372e+06	307	35.3185	5.26221
P24156	Protein l(2)37Cc OS=Drosophila melanogaster GN=l(2)37Cc PE=2 SV=2 - [L2CC_DROME]	20.6888	22.1	1	5	5	7	2.18404e+07	276	30.3651	5.73193
P91926	AP-2 complex subunit alpha OS=Drosophila melanogaster GN=AP-2alpha PE=1 SV=1 - [AP2A_DROME]	20.6386	10.11	2	8	8	8	5.33863e+06	940	105.553	7.18115
Q9NK57	Putative GTP cyclohydrolase 1 type 2 OS=Drosophila melanogaster GN=anon-35F/36A PE=2 SV=3 - [GTPC1_DROME]	20.6171	21.23	1	5	5	7	3.60301e+06	292	32.3429	6.90283
Q9VY48	Mitochondrial ribosomal protein L38 OS=Drosophila melanogaster GN=mRpL38 PE=2 SV=2 - [Q9VY48_DROME]	20.5967	12.02	1	4	4	7	2.07187e+07	416	47.7247	9.0708
Q8MSW0	Isoleucyl-tRNA synthetase, isoform A OS=Drosophila melanogaster GN=Aats-ile PE=2 SV=1 - [Q8MSW0_DROME]	20.5573	7.73	1	7	7	8	3.6416e+06	1229	141.01	7.51807
Q9VNA5	Proteasome subunit beta type-4 OS=Drosophila melanogaster GN=Prosbeta7 PE=2 SV=1 - [PSB4_DROME]	20.4695	17.91	1	5	5	7	1.33073e+07	268	29.9667	6.58057
P84040	Histone H4 OS=Drosophila melanogaster GN=His4 PE=1 SV=2 - [H4_DROME]	20.3501	31.07	1	3	3	8	2.03787e+07	103	11.3744	11.356
Q9VJ39	CG10602, isoform B OS=Drosophila melanogaster GN=CG10602 PE=4 SV=3 - [Q9VJ39_DROME]	20.3479	11.91	1	6	6	8	5.37728e+06	613	68.4462	5.50342
Q961R8	GH09263p OS=Drosophila melanogaster GN=Aats-gly PE=2 SV=1 - [Q961R8_DROME]	20.2898	9.57	2	5	5	7	2.79074e+06	679	75.756	6.40479
Q7K5K3	CG11876, isoform A OS=Drosophila melanogaster GN=CG11876 PE=2 SV=1 - [Q7K5K3_DROME]	20.1449	17.81	2	5	5	7	3.99968e+06	365	39.3264	7.79639
Q9VPQ2	CG4164 OS=Drosophila melanogaster GN=CG4164 PE=2 SV=1 - [Q9VPQ2_DROME]	19.8893	12.71	1	4	4	6	1.03226e+07	354	40.1862	5.66846
Q9Y0Y5	BcDNA.LD29885 OS=Drosophila melanogaster GN=epsilonCOP PE=2 SV=1 - [Q9Y0Y5_DROME]	19.7876	15.69	1	4	4	7	3.62697e+06	306	34.5974	4.86865
Q9VTB4	CG6463 OS=Drosophila melanogaster GN=CG6463 PE=2 SV=2 - [Q9VTB4_DROME]	19.6502	35.48	1	3	3	7	1.42251e+07	124	13.7793	9.39307
Q9W229	40S ribosomal protein S24 OS=Drosophila melanogaster GN=RpS24 PE=1 SV=1 - [Q9W229_DROME]	19.4858	20.61	1	2	2	6	1.65334e+06	131	15.0382	11.2241
A1Z713	Vacuolar protein sorting 13 OS=Drosophila melanogaster GN=Vps13 PE=4 SV=2 - [A1Z713_DROME]	19.4559	2.02	1	5	5	7	3.55416e+06	3321	374.309	5.84619
O61491	Flotillin-1 OS=Drosophila melanogaster GN=Flo-1 PE=2 SV=1 - [FLOT1_DROME]	19.3998	13.85	2	4	4	6	3.08463e+06	426	47.1052	5.64307
Q8IPB7	Lysosomal alpha-mannosidase, isoform B OS=Drosophila melanogaster GN=LM408 PE=4 SV=1 - [Q8IPB7_DROME]	19.3615	3.52	2	3	3	6	1.58401e+06	1080	122.659	5.73193
P49630	60S ribosomal protein L36 OS=Drosophila melanogaster GN=RpL36 PE=1 SV=1 - [RL36_DROME]	19.2765	26.09	1	3	3	7	1.4675e+07	115	13.4937	11.3706
Q9W0E4	Puromycin sensitive aminopeptidase, isoform A OS=Drosophila melanogaster GN=Psa PE=4 SV=1 - [Q9W0E4_DROME]	19.1826	5.43	3	4	4	6	4.5659e+06	866	99.2641	5.30029
Q9VT32	CG6767, isoform A OS=Drosophila melanogaster GN=CG6767 PE=2 SV=2 - [Q9VT32_DROME]	19.0907	10.86	6	3	3	7	4.89029e+06	350	38.2548	7.44482
Q9VXJ0	Peroxisomal multifunctional enzyme type 2 OS=Drosophila melanogaster GN=Mfe2 PE=1 SV=1 - [DHB4_DROME]	19.0347	9.87	1	4	4	6	2.67618e+06	598	64.0332	6.56592
P28668	Bifunctional glutamate/proline--tRNA ligase OS=Drosophila melanogaster GN=Aats-glupro PE=1 SV=2 - [SYEP_DROME]	18.9905	4.96	2	5	6	7	2.30766e+06	1714	189.293	8.63135
Q0E9F9	CG2915, isoform A OS=Drosophila melanogaster GN=CG2915-RB PE=2 SV=1 - [Q0E9F9_DROME]	18.8961	9.49	1	3	3	6	1.05083e+07	453	51.0244	6.12549
P06606	Tubulin alpha-4 chain OS=Drosophila melanogaster GN=alphaTub67C PE=3 SV=1 - [TBA4_DROME]	18.867	16.88	1	6	6	7	1.13329e+07	462	51.1479	5.26221
Q9VB96	CG31075 OS=Drosophila melanogaster GN=CG31075 PE=3 SV=2 - [Q9VB96_DROME]	18.7526	7.01	1	2	2	4	1.47363e+06	485	52.5728	6.66846
P26308	Guanine nucleotide-binding protein subunit beta-1 OS=Drosophila melanogaster GN=Gbeta13F PE=1 SV=1 - [GBB1_DROME]	18.7453	12.35	1	3	3	6	1.91428e+06	340	37.1089	6.44287
Q9VNH5	CG2091 OS=Drosophila melanogaster GN=CG2091 PE=2 SV=1 - [Q9VNH5_DROME]	18.7218	9.09	1	3	3	7	2.03903e+06	374	42.9708	5.30029
Q94920	Voltage-dependent anion-selective channel OS=Drosophila melanogaster GN=porin PE=1 SV=3 - [VDAC_DROME]	18.588	18.09	1	4	4	6	9.80437e+06	282	30.5315	6.96143
P08879	Nucleoside diphosphate kinase OS=Drosophila melanogaster GN=awd PE=1 SV=3 - [NDKA_DROME]	18.3858	23.53	1	3	3	7	4.47709e+06	153	17.1589	8.11865
Q9W5W8	CG9577 OS=Drosophila melanogaster GN=CG9577 PE=2 SV=2 - [Q9W5W8_DROME]	18.3793	12.5	1	3	3	6	1.37341e+07	312	33.7966	7.45947
Q9W3J5	Probable phenylalanine--tRNA ligase alpha subunit OS=Drosophila melanogaster GN=CG2263 PE=2 SV=1 - [SYFA_DROME]	18.1472	8.03	1	3	3	6	6.17476e+06	498	55.6487	6.75635
Q9V5C6	Proteasome subunit alpha type-3 OS=Drosophila melanogaster GN=Prosalpha7 PE=1 SV=1 - [PSA3_DROME]	18.1355	22.92	1	4	4	6	1.48907e+07	253	27.658	5.69385
Q9VRD9	Cystathionine beta-synthase, isoform A OS=Drosophila melanogaster GN=Cbs PE=1 SV=1 - [Q9VRD9_DROME]	18.0834	8.81	1	4	4	7	5.83725e+06	522	56.8463	7.06396
M9PD27	Eukaryotic release factor 1, isoform H OS=Drosophila melanogaster GN=eRF1 PE=4 SV=1 - [M9PD27_DROME]	18.0831	14.42	3	5	5	7	8.90545e+06	437	48.9612	6.0874
Q8SZK9	C-type lectin 27kD, isoform A OS=Drosophila melanogaster GN=Clect27 PE=2 SV=1 - [Q8SZK9_DROME]	17.9954	17.75	1	3	3	5	5.44062e+06	231	26.3301	8.1626
Q9VHP0	ATP-dependent RNA helicase bel OS=Drosophila melanogaster GN=bel PE=1 SV=1 - [DDX3_DROME]	17.8821	5.64	2	5	5	8	3.84741e+06	798	85.0293	7.53271
Q7JXZ2	Eip55E OS=Drosophila melanogaster GN=Eip55E PE=2 SV=1 - [Q7JXZ2_DROME]	17.8553	13.74	1	4	4	6	3.11901e+06	393	42.9613	7.62061
Q9VZS5	60S ribosomal protein L28 OS=Drosophila melanogaster GN=RpL28 PE=1 SV=1 - [RL28_DROME]	17.832	25	1	3	3	7	2.30821e+07	144	16.0191	11.0923
Q9Y0Y2	Adenylosuccinate synthetase OS=Drosophila melanogaster GN=AdSS PE=2 SV=1 - [PURA_DROME]	17.7015	8.05	1	3	3	6	1.12036e+06	447	48.8703	6.84424
P15215	Laminin subunit gamma-1 OS=Drosophila melanogaster GN=LanB2 PE=2 SV=2 - [LAMC1_DROME]	17.6918	2.68	1	3	3	5	914107	1639	182.223	5.37646
Q9VQR8	CG33123 OS=Drosophila melanogaster GN=CG33123 PE=3 SV=2 - [Q9VQR8_DROME]	17.6376	5.5	1	5	5	6	2.70804e+06	1182	134.787	7.63525
P12613	T-complex protein 1 subunit alpha OS=Drosophila melanogaster GN=T-cp1 PE=2 SV=2 - [TCPA_DROME]	17.3988	10.23	1	5	5	7	8.25713e+06	557	59.5193	6.39209
A0AQH0	Proteasome subunit beta type OS=Drosophila melanogaster GN=Prosbeta1 PE=2 SV=1 - [A0AQH0_DROME]	17.2687	14.29	1	2	2	6	1.68709e+07	224	24.2488	5.24951
Q9VFW4	MIP09035p OS=Drosophila melanogaster GN=poly PE=2 SV=1 - [Q9VFW4_DROME]	17.2439	16.73	1	3	3	5	2.38102e+06	251	27.9236	6.90283
Q7K110	CG6370 OS=Drosophila melanogaster GN=OstDelta PE=2 SV=1 - [Q7K110_DROME]	17.0722	8.68	1	4	4	5	2.39944e+06	634	69.187	9.17334
Q9VBU7	Nup358 OS=Drosophila melanogaster GN=Nup358 PE=4 SV=2 - [Q9VBU7_DROME]	16.9823	2	1	4	4	6	7.37751e+06	2695	296.201	6.0874
Q960J9	CG32633, isoform A OS=Drosophila melanogaster GN=CG1733 PE=2 SV=1 - [Q960J9_DROME]	16.8598	13.33	1	3	3	7	7.15163e+06	285	30.9412	5.56689
P36241	60S ribosomal protein L19 OS=Drosophila melanogaster GN=RpL19 PE=1 SV=2 - [RL19_DROME]	16.7613	13.3	1	2	2	5	5.17505e+06	203	23.9834	11.0044
Q9W021	39S ribosomal protein L23, mitochondrial OS=Drosophila melanogaster GN=mRpL23 PE=2 SV=1 - [RM23_DROME]	16.7295	20	1	3	3	7	4.16209e+06	150	17.8663	9.61279
Q9VZ23	GTP-binding nuclear protein Ran OS=Drosophila melanogaster GN=ran PE=1 SV=1 - [RAN_DROME]	16.7241	15.74	1	3	3	6	2.66128e+07	216	24.6927	7.81104
Q8MS37	RE15579p OS=Drosophila melanogaster GN=tyn PE=2 SV=1 - [Q8MS37_DROME]	16.6927	7.41	1	4	4	6	2.01008e+06	715	80.6301	5.90967
Q9VNA3	CG11999 OS=Drosophila melanogaster GN=CG11999 PE=2 SV=1 - [Q9VNA3_DROME]	16.6436	21.3	1	4	4	6	1.82137e+07	216	23.6186	6.80029
Q9VBU9	40S ribosomal protein S27 OS=Drosophila melanogaster GN=RpS27 PE=1 SV=1 - [Q9VBU9_DROME]	16.5507	28.57	1	2	2	7	9.97085e+06	84	9.35785	9.5249
O46036-2	Isoform A of C-terminal-binding protein OS=Drosophila melanogaster GN=CtBP - [CTBP_DROME]	16.2687	13.47	2	4	4	6	6.44317e+06	386	42.2248	6.97607
Q76NQ9	CG32626, isoform F OS=Drosophila melanogaster GN=AMPdeam PE=4 SV=2 - [Q76NQ9_DROME]	16.1517	7.7	7	4	4	5	6.00825e+06	649	75.7187	6.41748
Q9VWI2	Nat1 OS=Drosophila melanogaster GN=Nat1 PE=2 SV=1 - [Q9VWI2_DROME]	16.1303	4.83	1	4	4	6	4.47373e+06	890	103.027	7.26904
D6W4V3	CG14985, isoform C OS=Drosophila melanogaster GN=CG14985-RB PE=2 SV=1 - [D6W4V3_DROME]	16.1187	13.68	2	2	2	5	1.40528e+06	190	22.0651	5.23682
Q4Z8K6-3	Isoform C of Ran-binding proteins 9/10 homolog OS=Drosophila melanogaster GN=RanBPM - [RBP9X_DROME]	16.0272	9.03	3	4	4	6	2.30048e+06	598	66.3785	6.68311
Q9VBP6	GH21316p OS=Drosophila melanogaster GN=Ssadh PE=2 SV=1 - [Q9VBP6_DROME]	15.9949	7.07	1	3	3	6	3.73042e+06	509	54.9393	8.20654
A1Z7H3	Lethal (2) 44DEa, isoform C OS=Drosophila melanogaster GN=Acsl PE=4 SV=1 - [A1Z7H3_DROME]	15.8929	5.52	3	3	3	5	1.10377e+06	707	79.3773	8.44092
Q9W199	Mitochondrial ribosomal protein S17 OS=Drosophila melanogaster GN=mRpS17 PE=2 SV=1 - [Q9W199_DROME]	15.8892	23.87	1	4	4	6	6.88172e+06	155	18.0022	8.74854
Q9V3A8	Ergic53, isoform A OS=Drosophila melanogaster GN=ergic53 PE=2 SV=1 - [Q9V3A8_DROME]	15.8888	8.79	1	3	3	5	7.43024e+06	512	57.5327	6.07471
P49735	DNA replication licensing factor Mcm2 OS=Drosophila melanogaster GN=Mcm2 PE=1 SV=1 - [MCM2_DROME]	15.8232	5.41	1	4	4	5	2.81846e+06	887	100.351	5.10986
Q8WTC1	28S ribosomal protein S15, mitochondrial OS=Drosophila melanogaster GN=bonsai PE=2 SV=2 - [RT15_DROME]	15.7646	18.93	1	4	4	5	3.77403e+06	280	33.4515	9.20264
Q9VG32	Malic enzyme OS=Drosophila melanogaster GN=Men PE=2 SV=1 - [Q9VG32_DROME]	15.7317	6.46	2	4	4	6	1.22026e+06	759	84.3136	7.21045
Q7KV27	CG1640, isoform A OS=Drosophila melanogaster GN=CG1640 PE=4 SV=1 - [Q7KV27_DROME]	15.7079	6.34	2	3	3	5	3.72291e+06	568	63.0883	8.93896
Q9W127	CG3663 OS=Drosophila melanogaster GN=CG3663 PE=2 SV=1 - [Q9W127_DROME]	15.6527	29.33	1	5	5	6	7.59191e+06	208	23.2662	7.69385
Q9VLV5	Probable small nuclear ribonucleoprotein E OS=Drosophila melanogaster GN=SmE PE=1 SV=1 - [RUXE_DROME]	15.5897	27.66	1	3	3	5	2.60731e+06	94	11.0889	9.62744
Q8MSS7	Mitochondrial ribosomal protein S2 OS=Drosophila melanogaster GN=mRpS2 PE=2 SV=1 - [Q8MSS7_DROME]	15.5666	16.67	1	4	4	6	4.60773e+06	264	30.1925	9.14404
Q9VM18	Trehalose 6-phosphate phosphatase OS=Drosophila melanogaster GN=CG5177 PE=2 SV=1 - [Q9VM18_DROME]	15.4141	12.68	1	2	2	5	1.66748e+06	276	31.2336	7.12256
P41126	60S ribosomal protein L13 OS=Drosophila melanogaster GN=RpL13 PE=1 SV=1 - [RL13_DROME]	15.3943	24.77	1	5	5	7	3.18916e+07	218	24.9358	10.9897
Q9V4S8	COP9 signalosome complex subunit 7 OS=Drosophila melanogaster GN=CSN7 PE=1 SV=2 - [CSN7_DROME]	15.329	11.51	1	3	3	6	2.11632e+07	278	31.0483	6.69775
P13469	DNA-binding protein modulo OS=Drosophila melanogaster GN=mod PE=1 SV=2 - [MODU_DROME]	15.288	9.59	1	4	4	5	4.56834e+06	542	60.2732	5.42725
Q9GU68	Eukaryotic translation initiation factor 5A OS=Drosophila melanogaster GN=eIF-5A PE=2 SV=2 - [IF5A_DROME]	15.1854	21.38	1	3	3	6	9.54289e+06	159	17.5796	5.14795
Q9VXI3	CG9911, isoform C OS=Drosophila melanogaster GN=CG9911 PE=4 SV=1 - [Q9VXI3_DROME]	15.0996	12	2	4	4	6	2.59651e+06	375	43.3209	5.87158
Q8IPB1	Deoxyuridine triphosphatase, isoform B OS=Drosophila melanogaster GN=dUTPase PE=2 SV=1 - [Q8IPB1_DROME]	15.0949	22.99	2	3	3	6	7.07621e+06	174	18.4735	5.42725
Q9V597	60S ribosomal protein L31 OS=Drosophila melanogaster GN=RpL31 PE=1 SV=1 - [RL31_DROME]	15.0591	18.55	1	2	2	4	5.41123e+07	124	14.5237	10.1987
Q9VZX6	LD06441p OS=Drosophila melanogaster GN=mRpS35 PE=2 SV=1 - [Q9VZX6_DROME]	14.9482	11.66	1	3	3	6	3.04529e+06	326	37.6404	9.02686
Q27268	ATP-dependent RNA helicase WM6 OS=Drosophila melanogaster GN=Hel25E PE=1 SV=1 - [DX39B_DROME]	14.9472	14.15	7	5	6	6	9.18526e+06	424	48.6207	5.65576
O76454	Pterin-4-alpha-carbinolamine dehydratase OS=Drosophila melanogaster GN=Pcd PE=1 SV=2 - [PHS_DROME]	14.8776	14.58	1	2	2	5	2.04009e+06	192	21.054	9.75928
Q8SX32	Arginine methyltransferase 8 OS=Drosophila melanogaster GN=Art8 PE=2 SV=1 - [Q8SX32_DROME]	14.7146	12.02	1	3	3	4	2.66268e+06	341	38.4571	4.91943
Q07171-2	Isoform 2 of Gelsolin OS=Drosophila melanogaster GN=Gel - [GELS_DROME]	14.6959	7.3	4	5	5	6	8.20434e+06	740	82.4769	5.03369
P45594	Cofilin/actin-depolymerizing factor homolog OS=Drosophila melanogaster GN=tsr PE=2 SV=1 - [CADF_DROME]	14.6381	29.73	1	4	4	5	1.30483e+07	148	17.1425	7.1665
P17205	Serine proteases 1/2 OS=Drosophila melanogaster GN=Jon99Cii PE=2 SV=2 - [SER1_DROME]	14.5128	20.75	7	4	4	5	7.35431e+06	265	28.4509	6.59521
P55828	40S ribosomal protein S20 OS=Drosophila melanogaster GN=RpS20 PE=1 SV=1 - [RS20_DROME]	14.4254	22.5	1	2	2	5	2.78161e+07	120	13.4793	10.3306
Q7K148	Proteasome subunit beta type OS=Drosophila melanogaster GN=Prosbeta5 PE=2 SV=1 - [Q7K148_DROME]	14.2996	12.77	1	3	3	5	7.60434e+06	282	31.1413	6.93213
P19889	60S acidic ribosomal protein P0 OS=Drosophila melanogaster GN=RpLP0 PE=1 SV=1 - [RLA0_DROME]	14.2665	15.46	1	4	4	5	2.57993e+07	317	34.1809	6.94678
O46084	Serine/threonine-protein phosphatase Pgam5, mitochondrial OS=Drosophila melanogaster GN=Pgam5 PE=1 SV=1 - [PGAM5_DROME]	14.1726	12.8	1	3	3	5	2.69394e+06	289	33.145	8.85107
Q9VHJ8	SkpA associated protein, isoform A OS=Drosophila melanogaster GN=skap PE=3 SV=2 - [Q9VHJ8_DROME]	14.1596	9.96	2	4	4	5	3.80117e+06	502	54.773	8.66064
Q5U117	Enigma OS=Drosophila melanogaster GN=Egm PE=2 SV=1 - [Q5U117_DROME]	14.1586	9.7	1	4	4	5	2.15996e+06	639	70.7641	6.44287
Q00174	Laminin subunit alpha OS=Drosophila melanogaster GN=LanA PE=1 SV=2 - [LAMA_DROME]	14.1579	0.7	1	2	2	5	1.42794e+06	3712	410.893	5.22412
P45437	Coatomer subunit beta OS=Drosophila melanogaster GN=betaCop PE=2 SV=2 - [COPB_DROME]	14.1352	3.22	1	1	2	5	1.14613e+07	964	107.339	6.31592
Q9VV39	Mitochondrial ribosomal protein S34 OS=Drosophila melanogaster GN=mRpS34 PE=2 SV=2 - [Q9VV39_DROME]	14.1102	26.6	1	4	4	6	3.58034e+06	188	21.5975	9.5249
Q9VUJ1	Proteasome subunit beta type OS=Drosophila melanogaster GN=Prosbeta2 PE=2 SV=1 - [Q9VUJ1_DROME]	14.067	22.06	2	5	5	6	2.23472e+07	272	29.8083	8.66064
Q7KRI2	Longitudinals lacking protein-like OS=Drosophila melanogaster GN=lolal PE=1 SV=1 - [LOLAL_DROME]	14.0629	18.9	1	2	2	5	6.56587e+06	127	14.4793	7.40088
Q08473-3	Isoform C of RNA-binding protein squid OS=Drosophila melanogaster GN=sqd - [SQD_DROME]	14.0319	13.31	3	3	3	4	2.56643e+06	308	33.0338	6.96143
Q9VNF8	Sec23, isoform A OS=Drosophila melanogaster GN=Sec23 PE=4 SV=2 - [Q9VNF8_DROME]	14.0076	6.73	1	4	4	5	3.46226e+06	773	86.7464	6.78564
Q9W1F7	CG2970 OS=Drosophila melanogaster GN=CG2970 PE=2 SV=2 - [Q9W1F7_DROME]	13.9807	6.83	1	2	2	4	2.54008e+06	366	40.5061	8.83643
Q9W4I3	FI01736p OS=Drosophila melanogaster GN=mRpL30 PE=2 SV=1 - [Q9W4I3_DROME]	13.9636	16.67	1	2	2	4	2.43376e+07	180	20.9762	9.72998
M9PGX2	Pretaporter, isoform D OS=Drosophila melanogaster GN=prtp PE=4 SV=1 - [M9PGX2_DROME]	13.9262	13.03	2	4	4	6	3.66655e+06	353	39.76	5.42725
P48592	Ribonucleoside-diphosphate reductase subunit M2 OS=Drosophila melanogaster GN=RnrS PE=1 SV=2 - [RIR2_DROME]	13.925	12.72	1	4	4	5	1.44467e+06	393	45.0857	5.63037
Q9VI10	Probable small nuclear ribonucleoprotein Sm D2 OS=Drosophila melanogaster GN=SmD2 PE=1 SV=1 - [SMD2_DROME]	13.9243	24.37	1	2	2	4	3.6008e+06	119	13.4953	9.94971
Q01604	Phosphoglycerate kinase OS=Drosophila melanogaster GN=Pgk PE=2 SV=2 - [PGK_DROME]	13.9203	15.42	1	5	5	5	7.49751e+06	415	43.834	7.41553
Q24251	ATP synthase subunit d, mitochondrial OS=Drosophila melanogaster GN=ATPsyn-d PE=2 SV=2 - [ATP5H_DROME]	13.8763	22.47	1	3	3	5	2.15068e+06	178	20.1881	6.55127
O02373	UDP-glucose 6-dehydrogenase OS=Drosophila melanogaster GN=sgl PE=1 SV=1 - [UGDH_DROME]	13.8692	12.18	1	4	4	5	3.61288e+06	476	52.8412	6.17627
Q8IN49	CG31195 OS=Drosophila melanogaster GN=CG31195-RA PE=2 SV=2 - [Q8IN49_DROME]	13.869	5.82	1	4	4	5	4.05694e+06	807	94.3055	7.44482
A1Z892	LD11278p OS=Drosophila melanogaster GN=Prx2540-1 PE=2 SV=1 - [A1Z892_DROME]	13.8515	12.27	3	2	2	6	2.86026e+06	220	24.7686	6.43018
P46222	60S ribosomal protein L11 OS=Drosophila melanogaster GN=RpL11 PE=1 SV=2 - [RL11_DROME]	13.7791	11.96	1	2	2	4	5.29212e+07	184	21.0992	10.0229
P13008	40S ribosomal protein S26 OS=Drosophila melanogaster GN=RpS26 PE=1 SV=1 - [RS26_DROME]	13.7308	13.16	1	1	1	4	702544	114	13.2582	11.1509
Q27415-2	Isoform 2 of Nucleoplasmin-like protein OS=Drosophila melanogaster GN=Nlp - [NLP_DROME]	13.7232	20.66	2	2	2	5	1.22791e+07	121	13.5228	4.81787
Q9VHC7	FI21236p1 OS=Drosophila melanogaster GN=rump PE=2 SV=1 - [Q9VHC7_DROME]	13.7215	5.06	1	2	2	4	1.39081e+06	632	66.6907	7.85498
M9PD08	Ef1alpha-like factor, isoform C OS=Drosophila melanogaster GN=Elf PE=4 SV=1 - [M9PD08_DROME]	13.7092	6.67	2	2	2	3	1.70393e+06	495	55.2522	7.1958
P02283	Histone H2B OS=Drosophila melanogaster GN=His2B PE=1 SV=2 - [H2B_DROME]	13.5722	29.27	1	3	3	5	1.34882e+07	123	13.6875	10.3452
Q9VTU4	Eukaryotic translation initiation factor 3 subunit L OS=Drosophila melanogaster GN=CG5642 PE=2 SV=1 - [EIF3L_DROME]	13.566	7.98	1	3	3	4	4.04327e+06	539	63.1824	5.96045
Q7JXF5	GH12838p OS=Drosophila melanogaster GN=Nup62 PE=2 SV=1 - [Q7JXF5_DROME]	13.56	13.2	1	4	4	5	2.97754e+06	394	40.6594	4.80518
Q9VL78	FK506-binding protein 59 OS=Drosophila melanogaster GN=FKBP59 PE=1 SV=1 - [FKB59_DROME]	13.5448	8.2	1	3	3	5	2.95856e+06	439	48.7646	5.41455
Q9VL70	HL08109p OS=Drosophila melanogaster GN=yip2 PE=2 SV=1 - [Q9VL70_DROME]	13.4636	14.07	1	4	4	5	1.28048e+07	398	41.5841	8.51416
Q9W5N2	60S ribosomal protein L38 OS=Drosophila melanogaster GN=RpL38 PE=1 SV=1 - [RL38_DROME]	13.3518	28.57	1	2	2	6	2.34591e+07	70	8.19464	10.2866
P50882	60S ribosomal protein L9 OS=Drosophila melanogaster GN=RpL9 PE=1 SV=2 - [RL9_DROME]	13.3498	14.21	1	3	3	4	9.4777e+06	190	21.3783	9.68604
Q9V3J4	Sec13 OS=Drosophila melanogaster GN=Sec13 PE=4 SV=1 - [Q9V3J4_DROME]	13.335	17.7	1	4	4	5	4.84855e+06	356	39.5032	6.25244
E1JIL5	Mitochondrial ribosomal protein S10, isoform D OS=Drosophila melanogaster GN=mRpS10 PE=4 SV=1 - [E1JIL5_DROME]	13.312	15.33	3	2	2	5	1.83108e+07	150	17.1809	8.96826
Q9VFV9	DnaJ-like-2, isoform A OS=Drosophila melanogaster GN=Droj2 PE=2 SV=1 - [Q9VFV9_DROME]	13.2809	9.18	1	3	3	5	2.8848e+06	403	45.2016	6.48096
Q9V9S8-3	Isoform C of Ferrochelatase, mitochondrial OS=Drosophila melanogaster GN=FeCh - [HEMH_DROME]	13.2723	14.23	3	3	3	5	1.37113e+06	281	31.7644	9.20264
P36872-2	Isoform B of Protein phosphatase PP2A 55 kDa regulatory subunit OS=Drosophila melanogaster GN=tws - [2ABA_DROME]	13.2073	5.19	2	2	2	5	5.54481e+06	443	50.7573	6.41748
Q9VUZ0	BcDNA.LD10457 OS=Drosophila melanogaster GN=SsRbeta PE=2 SV=2 - [Q9VUZ0_DROME]	13.1889	19.47	1	2	2	4	2.09141e+07	190	21.193	8.71924
Q9VBH8	FI02850p OS=Drosophila melanogaster GN=RpL34a PE=1 SV=2 - [Q9VBH8_DROME]	13.1562	12.35	2	2	2	5	61199332	162	18.0574	11.4438
Q27601	Amidophosphoribosyltransferase OS=Drosophila melanogaster GN=Prat PE=1 SV=2 - [PUR1_DROME]	13.1278	8.61	1	4	4	5	1.78574e+06	546	59.4819	6.66846
P49963	Signal recognition particle 19 kDa protein OS=Drosophila melanogaster GN=Srp19 PE=2 SV=2 - [SRP19_DROME]	13.0475	32.5	1	3	3	4	1.33924e+06	160	18.3832	10.0376
Q9VAC1	CG7920, isoform A OS=Drosophila melanogaster GN=CG7920 PE=2 SV=1 - [Q9VAC1_DROME]	13.0167	8.81	1	3	3	4	8.40598e+06	477	51.8216	8.11865
Q7K3E2	CG5080, isoform A OS=Drosophila melanogaster GN=CG5080 PE=2 SV=1 - [Q7K3E2_DROME]	12.9478	7.76	1	4	4	6	2.64822e+06	554	61.1965	5.61768
Q9VBN5	60S ribosomal protein L27 OS=Drosophila melanogaster GN=RpL27 PE=1 SV=1 - [Q9VBN5_DROME]	12.9272	21.48	1	2	2	4	9.59806e+06	135	15.8929	10.6089
P35122	Ubiquitin carboxyl-terminal hydrolase OS=Drosophila melanogaster GN=Uch PE=2 SV=2 - [UCHL_DROME]	12.9097	11.01	2	2	2	5	2.63507e+06	227	25.8341	5.49072
P04359	60S ribosomal protein L32 OS=Drosophila melanogaster GN=RpL32 PE=1 SV=3 - [RL32_DROME]	12.8393	17.16	1	2	2	5	2.53583e+06	134	16.0098	11.3999
Q24298	DE-cadherin OS=Drosophila melanogaster GN=shg PE=1 SV=2 - [CADE_DROME]	12.797	2.46	1	3	3	4	944092	1507	169.715	4.77979
Q26454	DNA replication licensing factor MCM4 OS=Drosophila melanogaster GN=dpa PE=1 SV=2 - [MCM4_DROME]	12.769	5.31	1	4	4	5	1.85858e+06	866	96.5496	7.51807
O18373	Selenide, water dikinase OS=Drosophila melanogaster GN=SelD PE=1 SV=1 - [SPS1_DROME]	12.7579	9.05	1	3	3	4	3.52326e+06	398	43.4182	6.93213
O96827	Probable elongation factor 1-beta OS=Drosophila melanogaster GN=Ef1beta PE=1 SV=3 - [EF1B_DROME]	12.744	14.41	1	3	3	5	6.88807e+06	222	24.2321	4.57666
Q9VKZ8	Ubiquitin carboxyl-terminal hydrolase OS=Drosophila melanogaster GN=CG5384 PE=2 SV=1 - [Q9VKZ8_DROME]	12.6939	8.42	1	3	3	4	2.05206e+06	475	53.673	6.25244
Q9VXN4	Probable arginine--tRNA ligase, cytoplasmic OS=Drosophila melanogaster GN=Aats-arg PE=2 SV=1 - [SYRC_DROME]	12.6802	4.36	1	2	2	4	1.2637e+06	665	75.5291	7.44482
Q94516	ATP synthase subunit b, mitochondrial OS=Drosophila melanogaster GN=ATPsyn-b PE=2 SV=2 - [AT5F1_DROME]	12.6774	12.76	1	3	3	5	5.22852e+06	243	27.3403	8.71924
P45888-2	Isoform A of Actin-related protein 2 OS=Drosophila melanogaster GN=Arp2 - [ARP2_DROME]	12.666	11.42	2	3	3	5	1.56152e+06	394	44.674	6.22705
Q9W402	CG3446 OS=Drosophila melanogaster GN=CG3446 PE=2 SV=1 - [Q9W402_DROME]	12.5448	9.09	1	1	1	4	1.97466e+06	154	17.7363	9.39307
P11046	Laminin subunit beta-1 OS=Drosophila melanogaster GN=LanB1 PE=1 SV=4 - [LAMB1_DROME]	12.5314	2.07	1	3	3	4	1.32207e+06	1788	198.205	5.32568
Q9VW56	Probable prefoldin subunit 6 OS=Drosophila melanogaster GN=CG7770 PE=2 SV=1 - [PFD6_DROME]	12.4885	20	1	2	2	4	3.79798e+06	125	14.4184	8.51416
Q9VJZ7	Ribosomal RNA processing protein 1 homolog OS=Drosophila melanogaster GN=Nnp-1 PE=1 SV=1 - [RRP1L_DROME]	12.4546	7.57	1	4	4	4	2.04873e+06	687	78.9465	9.20264
Q9VMU4	60S ribosomal protein L37a OS=Drosophila melanogaster GN=RpL37A PE=1 SV=3 - [RL37A_DROME]	12.3987	29.35	1	2	2	5	4.12096e+07	92	10.3044	10.6089
Q9VEP6	CG3590 OS=Drosophila melanogaster GN=AdSL PE=2 SV=1 - [Q9VEP6_DROME]	12.3982	6.24	1	2	2	4	2.22791e+06	481	53.7638	7.48877
Q9W1Y1	ER membrane protein complex subunit 8/9 homolog OS=Drosophila melanogaster GN=CG3501 PE=1 SV=1 - [EMC89_DROME]	12.3361	7.39	1	1	1	3	1.3227e+06	203	22.7665	6.04932
Q9VPE2	CG6020, isoform A OS=Drosophila melanogaster GN=CG6020 PE=4 SV=1 - [Q9VPE2_DROME]	12.336	10.34	1	3	3	5	4.28793e+06	416	46.7923	9.39307
Q7JXC4	CG6459 OS=Drosophila melanogaster GN=P32 PE=2 SV=1 - [Q7JXC4_DROME]	12.2472	8.75	1	2	2	5	6.60535e+06	263	28.9574	5.08447
Q9VKM8	CG33129, isoform A OS=Drosophila melanogaster GN=CG33129 PE=2 SV=1 - [Q9VKM8_DROME]	12.2272	12.66	2	2	2	4	3.24101e+06	237	25.7816	9.74463
Q9XYZ5	DNA damage-binding protein 1 OS=Drosophila melanogaster GN=pic PE=1 SV=1 - [DDB1_DROME]	12.2116	3.86	1	4	4	5	2.84704e+06	1140	125.965	5.36377
P13706-4	Isoform GPDH-3 of Glycerol-3-phosphate dehydrogenase [NAD(+)], cytoplasmic OS=Drosophila melanogaster GN=Gpdh - [GPDA_DROME]	12.1817	4.57	4	1	1	4	1.8726e+06	350	38.2338	6.60986
Q9I7P8	CG4365, isoform B OS=Drosophila melanogaster GN=CG4365 PE=3 SV=1 - [Q9I7P8_DROME]	12.1428	9.59	3	2	2	4	2.02414e+06	271	30.3231	6.07471
Q9VPX7	Adenylyl cyclase-associated protein OS=Drosophila melanogaster GN=capt PE=3 SV=2 - [Q9VPX7_DROME]	12.1351	7.08	2	3	3	5	8.54503e+06	424	45.5762	7.06396
Q9VZQ8	Glutathione peroxidase OS=Drosophila melanogaster GN=PHGPx PE=2 SV=1 - [Q9VZQ8_DROME]	12.1258	14.2	3	2	2	5	5.55548e+06	169	18.6645	7.82568
Q9U9Q4	Eukaryotic translation initiation factor 3 subunit H OS=Drosophila melanogaster GN=eIF-3p40 PE=2 SV=2 - [EIF3H_DROME]	12.0313	6.51	1	2	2	4	7.00858e+06	338	38.3832	6.1001
Q9V813	S-methyl-5'-thioadenosine phosphorylase OS=Drosophila melanogaster GN=Mtap PE=1 SV=1 - [MTAP_DROME]	12.0261	6.23	1	1	1	3	3.84101e+06	289	31.9972	6.43018
Q9VSS1	Pixie, isoform A OS=Drosophila melanogaster GN=pix PE=2 SV=1 - [Q9VSS1_DROME]	11.9827	5.73	1	3	3	5	3.71924e+06	611	69.254	8.1333
Q9VNF3	CG12171 OS=Drosophila melanogaster GN=CG12171 PE=2 SV=1 - [Q9VNF3_DROME]	11.9496	8.95	1	1	2	4	1.51097e+07	257	26.9013	7.50342
Q9VBH7	CG14544 OS=Drosophila melanogaster GN=CG14544 PE=2 SV=1 - [Q9VBH7_DROME]	11.944	8.52	1	2	2	3	1.10497e+06	317	35.0783	7.03467
Q9VTW6	CG10418 OS=Drosophila melanogaster GN=CG10418 PE=4 SV=1 - [Q9VTW6_DROME]	11.8648	20	1	1	1	3	7.62517e+06	95	10.7306	6.52197
Q04047-2	Isoform 2 of Protein no-on-transient A OS=Drosophila melanogaster GN=nonA - [NONA_DROME]	11.8038	7.31	3	4	4	4	2.52135e+06	698	76.9711	9.24658
P40301	Proteasome subunit alpha type-2 OS=Drosophila melanogaster GN=Prosalpha2 PE=1 SV=1 - [PSA2_DROME]	11.7969	14.53	1	3	3	4	1.94456e+07	234	25.8901	6.68311
P39018	40S ribosomal protein S19a OS=Drosophila melanogaster GN=RpS19a PE=1 SV=3 - [RS19A_DROME]	11.7452	21.15	1	3	3	5	1.58998e+07	156	17.2803	10.1108
Q9V5P6	H/ACA ribonucleoprotein complex subunit 3 OS=Drosophila melanogaster GN=CG7637 PE=1 SV=1 - [NOP10_DROME]	11.7258	42.19	1	2	2	4	2.44462e+07	64	7.62903	9.92041
Q7YU05	LD13846p OS=Drosophila melanogaster GN=l(1)G0334 PE=2 SV=1 - [Q7YU05_DROME]	11.7129	8.84	3	3	3	5	3.05187e+06	328	35.8715	6.53662
Q9V8M5	Probable 3-hydroxyisobutyrate dehydrogenase, mitochondrial OS=Drosophila melanogaster GN=CG15093 PE=2 SV=2 - [3HIDH_DROME]	11.556	11.42	1	2	2	3	4.46864e+06	324	33.861	8.1333
Q9VQD7	CG3214, isoform A OS=Drosophila melanogaster GN=CG3214 PE=4 SV=1 - [Q9VQD7_DROME]	11.5393	16.9	1	2	2	4	3.21004e+06	142	16.8124	9.23193
Q9VFC8-2	Isoform B of Glycogen [starch] synthase OS=Drosophila melanogaster GN=GlyS - [GYS_DROME]	11.5257	4.64	2	3	3	5	968207	689	79.1836	6.59521
Q9VMY9	CG18143 OS=Drosophila melanogaster GN=DhpD PE=2 SV=1 - [Q9VMY9_DROME]	11.5228	6.25	1	2	2	4	1.0655e+06	448	48.8539	6.43018
Q8SXM8	Lysine--tRNA ligase OS=Drosophila melanogaster GN=Aats-lys PE=2 SV=1 - [Q8SXM8_DROME]	11.5206	8.36	2	4	4	5	2.78908e+06	574	64.6199	6.50732
Q9V9Q4	CG1416, isoform A OS=Drosophila melanogaster GN=CG1416 PE=2 SV=2 - [Q9V9Q4_DROME]	11.4327	8.19	1	2	2	3	2.13224e+06	354	40.1291	6.56592
Q9VDT1	Arc42 OS=Drosophila melanogaster GN=Arc42 PE=2 SV=1 - [Q9VDT1_DROME]	11.3977	3.21	1	1	1	4		405	43.6262	7.88428
Q9VSD6	D-Importin 7/RanBP7 OS=Drosophila melanogaster GN=msk PE=2 SV=1 - [Q9VSD6_DROME]	11.3628	2.29	1	2	2	3	1.90329e+06	1049	119.234	4.85596
Q76NQ0	CG33303, isoform A OS=Drosophila melanogaster GN=CG33303 PE=4 SV=1 - [Q76NQ0_DROME]	11.2836	9.83	1	4	4	5	7.49384e+06	458	51.6774	8.04541
P20432	Glutathione S-transferase 1-1 OS=Drosophila melanogaster GN=GstD1 PE=1 SV=1 - [GSTT1_DROME]	11.2813	12.92	1	3	3	5	1.79105e+07	209	23.8511	7.2251
Q95RV5	Ribulose-phosphate 3-epimerase OS=Drosophila melanogaster GN=CG1364 PE=2 SV=1 - [Q95RV5_DROME]	11.1961	15.84	1	2	2	3	3.34192e+06	221	24.2122	5.40186
P84051	Histone H2A OS=Drosophila melanogaster GN=His2A PE=1 SV=2 - [H2A_DROME]	11.1688	12.9	3	2	2	4	1.46529e+08	124	13.3545	10.7261
A1Z7J7	Sec31, isoform A OS=Drosophila melanogaster GN=Sec31 PE=4 SV=1 - [A1Z7J7_DROME]	11.1649	1.05	2	1	1	3	1.13988e+06	1240	135.927	6.13818
P42207	Septin-1 OS=Drosophila melanogaster GN=Sep1 PE=1 SV=1 - [SEPT1_DROME]	11.1106	3.05	1	1	1	4	5.49706e+06	361	41.1051	6.55127
Q9VXK7	CG9172, isoform A OS=Drosophila melanogaster GN=CG9172 PE=2 SV=1 - [Q9VXK7_DROME]	11.0401	15.38	2	3	3	4	6.95256e+06	221	24.5776	9.74463
Q9VAN0	Probable phosphoserine aminotransferase OS=Drosophila melanogaster GN=CG11899 PE=2 SV=1 - [SERC_DROME]	11.0049	9.34	1	3	3	4	5.75855e+06	364	39.5153	8.41162
P48596-2	Isoform B of GTP cyclohydrolase 1 OS=Drosophila melanogaster GN=Pu - [GCH1_DROME]	10.9685	12.09	3	3	3	5	5.05685e+06	273	29.7931	6.354
Q9VWG1	CG14207, isoform A OS=Drosophila melanogaster GN=HspB8 PE=2 SV=1 - [Q9VWG1_DROME]	10.9406	18.03	3	2	2	3	1.16854e+06	183	20.8287	5.93506
P26686-3	Isoform B of Serine-arginine protein 55 OS=Drosophila melanogaster GN=B52 - [SRR55_DROME]	10.8422	9.12	8	3	3	5	5.98693e+06	329	37.5135	11.4731
Q9VU36	LP04985p OS=Drosophila melanogaster GN=mRpL20 PE=2 SV=1 - [Q9VU36_DROME]	10.8154	18	1	2	2	3	1.94241e+06	150	17.3614	10.5649
Q9VYI3	Probable 39S ribosomal protein L49, mitochondrial OS=Drosophila melanogaster GN=mRpL49 PE=3 SV=1 - [RM49_DROME]	10.789	17.88	1	2	2	4	1.63877e+06	179	20.6448	9.62744
P25991-4	Isoform E of Protein suppressor of forked OS=Drosophila melanogaster GN=su(f) - [SUF_DROME]	10.7849	3.55	2	2	2	4	997269	733	84.4056	8.29443
O76464	Nitrilase and fragile histidine triad fusion protein NitFhit OS=Drosophila melanogaster GN=NitFhit PE=1 SV=1 - [NFT1_DROME]	10.7404	2.83	1	1	1	3	1.17853e+06	460	52.1986	7.60596
P08645	Ras-like protein 3 OS=Drosophila melanogaster GN=R PE=2 SV=2 - [RAS3_DROME]	10.7243	17.93	1	3	3	4	5.04832e+06	184	20.8497	6.68311
Q9VSY2	CG3689, isoform B OS=Drosophila melanogaster GN=CG3689 PE=2 SV=2 - [Q9VSY2_DROME]	10.7178	15.27	2	3	3	3	2.59945e+06	203	23.0157	7.15186
Q9W2Y3	NAD(P)H-hydrate epimerase OS=Drosophila melanogaster GN=CG2974 PE=2 SV=2 - [NNRE_DROME]	10.6608	15.22	1	2	2	3	847431	230	25.4979	6.04932
Q9VCA5	Probable phenylalanine--tRNA ligase beta subunit OS=Drosophila melanogaster GN=CG5706 PE=2 SV=1 - [SYFB_DROME]	10.6051	4.92	1	2	2	4	1.77722e+06	589	65.7362	6.03662
Q9V9A7	Probable methylcrotonoyl-CoA carboxylase beta chain, mitochondrial OS=Drosophila melanogaster GN=l(2)04524 PE=2 SV=1 - [MCCB_DROME]	10.5381	5.02	1	2	2	3	1.94934e+06	578	62.6089	7.48877
P80455	40S ribosomal protein S12 OS=Drosophila melanogaster GN=RpS12 PE=1 SV=2 - [RS12_DROME]	10.5243	20.14	1	2	2	3	7.37807e+06	139	15.1589	6.37939
Q9VJJ0	Proteasome subunit beta type OS=Drosophila melanogaster GN=Prosbeta4 PE=1 SV=1 - [Q9VJJ0_DROME]	10.4924	15.92	1	3	3	4	1.14838e+07	201	22.4674	6.39209
P54351	Vesicle-fusing ATPase 2 OS=Drosophila melanogaster GN=Nsf2 PE=2 SV=2 - [NSF2_DROME]	10.4593	4.65	2	3	3	4	1.46639e+06	752	83.3817	6.7417
Q9W0Y1	Troponin C-akin-1 protein OS=Drosophila melanogaster GN=Tina-1 PE=2 SV=1 - [TINA1_DROME]	10.4258	15.57	1	2	2	3	3.52634e+06	167	19.0435	7.44482
O97182	Actin related complex p41 subunit OS=Drosophila melanogaster GN=Arpc1 PE=2 SV=1 - [O97182_DROME]	10.3822	12.2	1	3	3	3	2.67071e+06	377	41.5748	8.35303
Q7KLX3	GM12291p OS=Drosophila melanogaster GN=Tapdelta PE=2 SV=1 - [Q7KLX3_DROME]	10.334	12.65	1	2	2	4	7.57061e+06	166	17.59	8.54346
Q9VAX8	CG4849 OS=Drosophila melanogaster GN=CG4849 PE=2 SV=1 - [Q9VAX8_DROME]	10.3245	3.69	1	3	3	4	1.69058e+06	975	110.58	5.03369
P20477	Glutamine synthetase 1, mitochondrial OS=Drosophila melanogaster GN=Gs1 PE=2 SV=3 - [GLNA1_DROME]	10.301	9.77	1	2	3	4	2.39354e+06	399	44.3684	6.45557
Q9VDP9	CG4390, isoform A OS=Drosophila melanogaster GN=CG4390 PE=2 SV=1 - [Q9VDP9_DROME]	10.2622	4.55	2	1	1	3	3.3803e+06	286	31.4214	5.8335
Q8IRG6	FACT complex subunit spt16 OS=Drosophila melanogaster GN=dre4 PE=1 SV=2 - [SPT16_DROME]	10.2351	2.68	2	2	2	3	2.63695e+06	1083	123.506	6.29053
Q9GYU8	Nuclear pore complex protein Nup88 OS=Drosophila melanogaster GN=mbo PE=1 SV=2 - [NUP88_DROME]	10.1986	6.13	1	3	3	4	2.12317e+06	702	78.6322	5.90967
Q9VWI0	CG12203 OS=Drosophila melanogaster GN=CG12203 PE=2 SV=2 - [Q9VWI0_DROME]	10.1119	23.5	1	3	3	4	4.58327e+06	183	20.6684	9.80322
O16797-4	Isoform B of 60S ribosomal protein L3 OS=Drosophila melanogaster GN=RpL3 - [RL3_DROME]	10.0903	10.67	4	3	3	4	2.3813e+07	403	45.4073	10.1841
Q9VP87	CG10585 OS=Drosophila melanogaster GN=CG10585 PE=2 SV=1 - [Q9VP87_DROME]	10.0618	8.93	1	3	3	4	3.44125e+06	448	49.4143	6.80029
Q9VZL5	CG14980 OS=Drosophila melanogaster GN=Ccz1 PE=2 SV=3 - [Q9VZL5_DROME]	10.0296	4.12	1	1	1	2	545741	485	55.4879	5.89697
Q9VRS6	Jonah 65Aiv OS=Drosophila melanogaster GN=Jon65Aiv PE=2 SV=1 - [Q9VRS6_DROME]	10.0163	12.18	1	2	2	3	1.39342e+06	271	27.9991	7.7085
P07909-3	Isoform E of Heterogeneous nuclear ribonucleoprotein A1 OS=Drosophila melanogaster GN=Hrb98DE - [ROA1_DROME]	10.0115	9.17	6	3	3	4	5.67663e+06	360	38.527	8.85107
M9NCR7	Oscillin, isoform E OS=Drosophila melanogaster GN=Oscillin PE=3 SV=1 - [M9NCR7_DROME]	10.0013	8.27	3	2	2	4	4.1554e+06	266	29.976	6.53662
O62531	AP-47 OS=Drosophila melanogaster GN=AP-1mu PE=2 SV=1 - [O62531_DROME]	9.98863	12.68	1	4	4	4	3.76568e+06	426	48.9096	7.18115
Q9VTZ7	CG4069 OS=Drosophila melanogaster GN=CG4069 PE=2 SV=1 - [Q9VTZ7_DROME]	9.9737	5.3	1	2	2	4	1.37142e+06	509	56.3156	6.72705
Q9VXF1	Serine/threonine-protein phosphatase 2B catalytic subunit 3 OS=Drosophila melanogaster GN=CanA-14F PE=1 SV=4 - [PP2B3_DROME]	9.96867	3.42	3	2	2	4	2.85313e+06	584	64.2445	6.07471
Q9VK60	CG6180 OS=Drosophila melanogaster GN=CG6180 PE=2 SV=2 - [Q9VK60_DROME]	9.91564	10.89	1	1	1	2	2.27794e+06	257	28.6877	8.82178
Q8IQW2	Cytochrome c oxidase subunit VIb, isoform B OS=Drosophila melanogaster GN=CoVIb PE=4 SV=1 - [Q8IQW2_DROME]	9.91163	15.58	2	1	1	3	4.69626e+06	77	9.28034	8.47021
Q9VDE4	CG17282 OS=Drosophila melanogaster GN=Bdbt PE=1 SV=1 - [Q9VDE4_DROME]	9.8865	4.55	1	1	1	3	2.50672e+06	286	32.9471	8.38232
Q9V9Z3	CG31005 OS=Drosophila melanogaster GN=qless PE=2 SV=2 - [Q9V9Z3_DROME]	9.86391	5.96	1	2	2	3	3.5547e+06	436	48.9419	8.26514
M9PGB6	CG7519, isoform B OS=Drosophila melanogaster GN=CG7519 PE=4 SV=1 - [M9PGB6_DROME]	9.82684	23.18	2	3	3	4	6.3203e+06	151	17.5907	5.2749
Q9VIU7	Probable dolichol-phosphate mannosyltransferase OS=Drosophila melanogaster GN=CG10166 PE=3 SV=1 - [DPM1_DROME]	9.82349	5.81	1	1	1	3	1.73178e+06	241	26.9852	8.79248
Q9VWA1	Clathrin light chain OS=Drosophila melanogaster GN=Clc PE=2 SV=1 - [CLC_DROME]	9.78016	11.87	1	2	2	3	1.86021e+07	219	23.8259	4.77979
Q9V345	COP9 signalosome complex subunit 4 OS=Drosophila melanogaster GN=CSN4 PE=1 SV=1 - [CSN4_DROME]	9.77846	9.34	1	3	3	4	4.0059e+06	407	46.4441	6.31592
Q9XZ61	26S proteasome regulatory complex subunit p37A OS=Drosophila melanogaster GN=Uch-L5 PE=2 SV=1 - [Q9XZ61_DROME]	9.72322	9.26	1	3	3	4	2.67993e+06	324	37.6491	5.21143
Q9W247	CG4752 OS=Drosophila melanogaster GN=CG4752-RA PE=2 SV=2 - [Q9W247_DROME]	9.71227	2.86	1	2	2	2	1.89475e+06	1294	139.525	6.46826
Q9VKJ3	Nuclear pore complex protein Nup160 homolog OS=Drosophila melanogaster GN=Nup160 PE=1 SV=1 - [NU160_DROME]	9.69758	0.92	1	1	1	3	1.61779e+06	1411	160.174	5.36377
Q9VVX4	Mitochondrial ribosomal protein L21, isoform A OS=Drosophila melanogaster GN=mRpL21 PE=2 SV=2 - [Q9VVX4_DROME]	9.68933	15.42	1	2	2	4	1.7695e+06	201	22.5991	10.1548
Q94522	Succinyl-CoA ligase [ADP/GDP-forming] subunit alpha, mitochondrial OS=Drosophila melanogaster GN=Scsalpha PE=2 SV=3 - [SUCA_DROME]	9.64544	8.84	1	2	2	3	3.8409e+06	328	34.3671	8.98291
Q9V535	RNA-binding protein 8A OS=Drosophila melanogaster GN=tsu PE=1 SV=1 - [RBM8A_DROME]	9.48496	15.76	1	2	2	4	3.2058e+06	165	18.9984	5.2749
P48375	12 kDa FK506-binding protein OS=Drosophila melanogaster GN=FK506-bp2 PE=3 SV=2 - [FKB12_DROME]	9.48101	24.07	1	2	2	4	2.75918e+06	108	11.659	8.1333
P52486	Ubiquitin-conjugating enzyme E2-22 kDa OS=Drosophila melanogaster GN=UbcD4 PE=1 SV=2 - [UBCD4_DROME]	9.43827	7.54	1	1	1	3	2.78383e+06	199	22.4955	5.46533
Q9VDL2	LD40493p OS=Drosophila melanogaster GN=TFAM PE=2 SV=1 - [Q9VDL2_DROME]	9.39098	8.56	2	2	2	4	2.38278e+06	257	29.9451	9.99365
Q8I937	CG32409 OS=Drosophila melanogaster GN=CG32409 PE=4 SV=2 - [Q8I937_DROME]	9.37277	7.74	1	2	2	3	3.78105e+06	349	39.4304	9.92041
Q9V9X1	CG12063 OS=Drosophila melanogaster GN=mey PE=4 SV=3 - [Q9V9X1_DROME]	9.35684	4.39	1	3	3	4	2.87144e+06	774	83.8285	5.17334
Q7K3B7	CG11208 OS=Drosophila melanogaster GN=CG11208 PE=2 SV=1 - [Q7K3B7_DROME]	9.29309	4.75	1	2	2	3	551171	568	62.2249	7.47412
Q9W4X7	Eukaryotic translation initiation factor 3 subunit G-1 OS=Drosophila melanogaster GN=eIF3-S4-1 PE=1 SV=1 - [EI3G1_DROME]	9.2837	13.01	1	2	2	4	4.64616e+06	269	29.9271	8.79248
A1Z9J3	Short stop, isoform H OS=Drosophila melanogaster GN=shot PE=4 SV=1 - [A1Z9J3_DROME]	9.27638	0.67	15	4	4	4	3.13173e+06	8805	988.943	5.70654
M9NFL1	eIF5B, isoform D OS=Drosophila melanogaster GN=eIF5B PE=4 SV=1 - [M9NFL1_DROME]	9.25593	1.19	3	1	1	3	1.92498e+06	1090	121.044	5.50342
Q95RS6	CG40160, isoform A OS=Drosophila melanogaster GN=CG40160 PE=2 SV=1 - [Q95RS6_DROME]	9.24676	4.04	1	1	1	2	1.09535e+06	421	45.6172	5.73193
Q9VIE7	Burgundy OS=Drosophila melanogaster GN=bur PE=2 SV=3 - [Q9VIE7_DROME]	9.23683	3.81	1	2	2	3	1.97953e+06	683	76.7421	6.80029
P41572	6-phosphogluconate dehydrogenase, decarboxylating OS=Drosophila melanogaster GN=Pgd PE=2 SV=1 - [6PGD_DROME]	9.23378	9.36	2	3	3	3	2.80313e+06	481	52.4576	6.46826
Q9V9W2	Ribosomal protein L6, isoform A OS=Drosophila melanogaster GN=RpL6 PE=1 SV=1 - [Q9V9W2_DROME]	9.18815	9.88	2	2	2	3	9.06411e+06	243	27.6806	10.6821
Q9VS44	CG8607 OS=Drosophila melanogaster GN=CG8607 PE=4 SV=2 - [Q9VS44_DROME]	9.16813	15.27	1	4	4	4	4.79014e+06	275	30.5068	6.90283
Q9VA81	IP02765p OS=Drosophila melanogaster GN=mRpS18C PE=2 SV=2 - [Q9VA81_DROME]	9.15208	25	1	3	3	4	7.14145e+06	140	16.1775	9.0708
Q9VBD7	TweedleK OS=Drosophila melanogaster GN=TwdlK PE=4 SV=1 - [Q9VBD7_DROME]	9.13654	5.67	7	1	1	2	3.07115e+06	247	25.8928	5.37646
Q9W303	Chitinase-like protein Idgf4 OS=Drosophila melanogaster GN=Idgf4 PE=2 SV=1 - [IDGF4_DROME]	9.1303	4.98	1	2	2	3	1.46512e+06	442	48.5741	7.82568
Q24439	ATP synthase subunit O, mitochondrial OS=Drosophila melanogaster GN=Oscp PE=2 SV=2 - [ATPO_DROME]	9.12898	18.66	2	3	3	4	2.93916e+06	209	22.4083	9.62744
A1Z9E3	Elongation factor Tu OS=Drosophila melanogaster GN=EfTuM PE=3 SV=1 - [A1Z9E3_DROME]	9.12514	4.5	1	3	3	4	1.1707e+06	489	53.9577	8.03076
Q9Y112	BcDNA.GH10614 OS=Drosophila melanogaster GN=BcDNA.GH10614 PE=2 SV=1 - [Q9Y112_DROME]	9.10366	10.76	1	2	2	3	5.52967e+06	316	36.2894	7.07861
O77477	CG4882 OS=Drosophila melanogaster GN=CG4882 PE=2 SV=1 - [O77477_DROME]	9.08243	5.91	1	2	2	4	3.13742e+06	406	45.679	8.55811
Q7KVQ0	Probable H/ACA ribonucleoprotein complex subunit 1 OS=Drosophila melanogaster GN=CG4038 PE=1 SV=1 - [GAR1_DROME]	9.01471	18.14	1	3	3	3	6.84687e+06	237	22.6513	11.1948
P41092	60S ribosomal protein L27a OS=Drosophila melanogaster GN=RpL27A PE=1 SV=2 - [RL27A_DROME]	8.89968	18.79	1	3	3	4	1.84157e+07	149	17.0113	10.7114
Q0E8E8	MIP08013p1 OS=Drosophila melanogaster GN=Mpcp PE=2 SV=1 - [Q0E8E8_DROME]	8.8825	4.78	1	2	2	4	7.26392e+06	356	38.825	8.88037
Q7KTH8	COP9 signalosome complex subunit 8 OS=Drosophila melanogaster GN=CSN8 PE=1 SV=1 - [CSN8_DROME]	8.83307	13.74	1	2	2	3	1.23385e+07	182	21.4179	4.86865
Q9VDV2	AT06125p OS=Drosophila melanogaster GN=CG6195 PE=2 SV=1 - [Q9VDV2_DROME]	8.82846	6.06	1	2	2	4	1.57159e+07	363	40.6104	8.57275
A1ZAH8	Ribosomal protein S15, isoform B OS=Drosophila melanogaster GN=RpS15 PE=2 SV=1 - [A1ZAH8_DROME]	8.81973	8.16	2	1	1	4	6.95936e+06	147	16.9682	10.3306
Q7K209	CG8525 OS=Drosophila melanogaster GN=CG8525 PE=2 SV=1 - [Q7K209_DROME]	8.81528	6.63	1	2	2	3	4.86783e+06	347	38.4781	7.86963
Q8IQZ7	FI19014p1 OS=Drosophila melanogaster GN=Fim PE=2 SV=1 - [Q8IQZ7_DROME]	8.81025	6.55	3	3	3	3	7.13803e+06	641	72.0219	5.5542
Q9VJZ6	CG6523 OS=Drosophila melanogaster GN=CG6523 PE=2 SV=1 - [Q9VJZ6_DROME]	8.739	8.33	1	1	1	2	957836	216	23.6162	4.85596
Q9VUY9	Phosphoglucomutase OS=Drosophila melanogaster GN=Pgm PE=1 SV=1 - [PGM_DROME]	8.70804	5.54	1	2	2	3	3.55315e+06	560	60.728	6.69775
A1Z6Z3	Aldehyde dehydrogenase OS=Drosophila melanogaster GN=Aldh-III PE=2 SV=1 - [A1Z6Z3_DROME]	8.7012	4.83	5	2	2	4	2.17792e+06	497	55.6997	7.76709
Q9VFR1	FAM206 family protein CG9288 OS=Drosophila melanogaster GN=CG9288 PE=1 SV=1 - [F206_DROME]	8.69988	14.49	1	2	2	3	1.15483e+06	214	23.816	5.08447
Q6NL75	Ecdysone-inducible gene L1, isoform C OS=Drosophila melanogaster GN=ImpL1 PE=2 SV=1 - [Q6NL75_DROME]	8.68345	10.59	3	2	2	4	3.9109e+06	340	38.2123	8.00146
Q9W0M7	CG13900, isoform A OS=Drosophila melanogaster GN=CG13900-RA PE=2 SV=2 - [Q9W0M7_DROME]	8.6734	2.44	1	2	2	3	1.59478e+06	1227	136.529	5.46533
Q94899	COP9 signalosome complex subunit 2 OS=Drosophila melanogaster GN=alien PE=1 SV=2 - [CSN2_DROME]	8.66664	3.38	1	1	1	2	1.61021e+06	444	51.4939	5.61768
M9PGT6	Protein phosphatase 4 regulatory subunit 2-related protein, isoform D OS=Drosophila melanogaster GN=PPP4R2r PE=4 SV=1 - [M9PGT6_DROME]	8.62922	4.21	2	2	2	3	1.25031e+06	522	56.2838	4.37354
Q9V431	Apoptosis inhibitor 5 homolog OS=Drosophila melanogaster GN=Aac11 PE=2 SV=1 - [API5_DROME]	8.60435	2.61	1	1	1	3	1.38667e+06	536	59.8929	6.75635
Q7K4B3	Probable elongator complex protein 2 OS=Drosophila melanogaster GN=Elp2 PE=1 SV=1 - [ELP2_DROME]	8.58581	3.53	1	2	2	3	2.25755e+06	794	88.9183	5.60498
Q9W4P5	V-type proton ATPase subunit d 1 OS=Drosophila melanogaster GN=VhaAC39-1 PE=2 SV=1 - [VA0D1_DROME]	8.5848	6.57	1	2	2	3	2.21619e+06	350	39.8257	4.90674
Q9V7D2	V-type proton ATPase subunit D 1 OS=Drosophila melanogaster GN=Vha36-1 PE=2 SV=1 - [VATD1_DROME]	8.54314	6.5	1	1	1	2	1.01347e+06	246	27.61	9.53955
Q9VDI3	CG17272 OS=Drosophila melanogaster GN=CG17272 PE=2 SV=2 - [Q9VDI3_DROME]	8.52218	8.72	1	1	1	3	1.03484e+06	149	17.1245	5.59229
P40945	ADP-ribosylation factor 2 OS=Drosophila melanogaster GN=Arf102F PE=2 SV=2 - [ARF2_DROME]	8.47106	11.67	1	1	2	3	1.15097e+07	180	20.6038	7.38623
P48588	40S ribosomal protein S25 OS=Drosophila melanogaster GN=RpS25 PE=1 SV=3 - [RS25_DROME]	8.4651	17.95	1	3	3	3	2.46463e+07	117	13.1934	10.272
P48148	Ras-like GTP-binding protein Rho1 OS=Drosophila melanogaster GN=Rho1 PE=1 SV=1 - [RHO1_DROME]	8.43425	19.27	1	3	3	3	2.54527e+06	192	21.7092	7.00537
P36951	Putative hydroxypyruvate isomerase OS=Drosophila melanogaster GN=Gip PE=1 SV=1 - [HYI_DROME]	8.41832	11.74	1	2	2	3	1.20196e+06	264	29.0749	6.53662
Q9V3J1-3	Isoform D of V-type proton ATPase subunit H OS=Drosophila melanogaster GN=VhaSFD - [VATH_DROME]	8.38299	5.9	3	2	2	3	2.0223e+06	441	50.6952	6.53662
Q9W334	40S ribosomal protein S28 OS=Drosophila melanogaster GN=RpS28b PE=1 SV=2 - [RS28_DROME]	8.38117	32.31	1	2	2	4	7.53698e+08	65	7.47205	10.3745
Q9V3H2	26S proteasome non-ATPase regulatory subunit 14 OS=Drosophila melanogaster GN=Rpn11 PE=1 SV=1 - [PSDE_DROME]	8.36006	8.77	1	2	2	3	2.26321e+07	308	34.3785	6.12549
P55935	40S ribosomal protein S9 OS=Drosophila melanogaster GN=RpS9 PE=1 SV=2 - [RS9_DROME]	8.30855	10.26	2	2	2	4	6.2967e+06	195	22.6096	10.6089
O18334	Ras-related protein Rab6 OS=Drosophila melanogaster GN=Rab6 PE=1 SV=1 - [RAB6_DROME]	8.29497	11.06	18	1	2	3	1.55677e+07	208	23.4657	5.36377
Q8IPX7	RE44908p OS=Drosophila melanogaster GN=Rrp40 PE=2 SV=1 - [Q8IPX7_DROME]	8.26705	8.62	1	2	2	3	1.60933e+06	232	25.0103	8.30908
O01367-2	Isoform Maternal of Protein held out wings OS=Drosophila melanogaster GN=how - [HOW_DROME]	8.26306	9.07	4	3	3	3	7.18938e+06	375	40.9182	6.96143
Q9VH81	GH12714p OS=Drosophila melanogaster GN=PpD3 PE=2 SV=1 - [Q9VH81_DROME]	8.2404	2.5	1	1	1	3	1.67419e+06	520	59.225	6.22705
O17445	60S ribosomal protein L15 OS=Drosophila melanogaster GN=RpL15 PE=1 SV=1 - [RL15_DROME]	8.2262	16.67	1	3	3	3	1.27515e+07	204	24.3102	11.4731
Q9V461	DNA replication licensing factor Mcm6 OS=Drosophila melanogaster GN=Mcm6 PE=1 SV=1 - [MCM6_DROME]	8.21286	4.53	1	3	3	3	1.74549e+06	817	92.2946	5.37646
Q9VGK3	Peptidyl-prolyl cis-trans isomerase OS=Drosophila melanogaster GN=CG14715 PE=2 SV=1 - [Q9VGK3_DROME]	8.20104	10.87	1	1	1	2	2.5592e+06	138	14.7747	8.5874
M9NDX0	Sallimus, isoform D OS=Drosophila melanogaster GN=sls PE=4 SV=1 - [M9NDX0_DROME]	8.16663	0.25	17	1	1	3	1.72964e+06	4811	542.117	5.99854
Q9VSL4	Glutathione S transferase O2, isoform B OS=Drosophila melanogaster GN=GstO2 PE=4 SV=2 - [Q9VSL4_DROME]	8.16099	6	1	1	1	2	2.31201e+06	250	28.707	7.04932
Q9VLT3	LD23292p OS=Drosophila melanogaster GN=Mcr PE=2 SV=1 - [Q9VLT3_DROME]	8.15001	1.36	1	2	2	3	3.05876e+06	1760	202.655	6.46826
Q9VL67	CG4594, isoform A OS=Drosophila melanogaster GN=CG4594 PE=2 SV=1 - [Q9VL67_DROME]	8.10587	5.71	1	1	1	2	1.2692e+06	280	30.7241	8.79248
Q9VJD4	LD24721p OS=Drosophila melanogaster GN=Sgt PE=2 SV=1 - [Q9VJD4_DROME]	8.06519	7.25	1	2	2	3	1.63843e+06	331	36.2304	4.64014
Q7KA66	Serine protease inhibitor 43Aa OS=Drosophila melanogaster GN=Spn43Aa PE=2 SV=1 - [Q7KA66_DROME]	8.01597	5.9	1	2	2	3	3.92655e+06	390	44.7617	5.50342
Q00168-4	Isoform 4 of Calcium/calmodulin-dependent protein kinase type II alpha chain OS=Drosophila melanogaster GN=CaMKII - [KCC2A_DROME]	7.97412	7.14	8	3	3	3	1.10757e+07	490	55.4473	7.44482
Q94517	Histone deacetylase Rpd3 OS=Drosophila melanogaster GN=Rpd3 PE=1 SV=2 - [HDAC1_DROME]	7.96445	7.68	1	3	3	3	5.64558e+06	521	58.2941	5.75732
M9NEE8	Rab8, isoform B OS=Drosophila melanogaster GN=Rab8 PE=3 SV=1 - [M9NEE8_DROME]	7.89733	13.37	19	1	2	3	1.78381e+07	172	19.675	8.35303
Q7KVL7	Vacuolar protein sorting-associated protein 35 OS=Drosophila melanogaster GN=Vps35 PE=3 SV=2 - [Q7KVL7_DROME]	7.88084	4.61	2	3	3	3	1.7478e+06	803	91.0726	5.42725
O76742	CG5915 protein OS=Drosophila melanogaster GN=Rab7 PE=2 SV=1 - [O76742_DROME]	7.87171	18.36	1	3	3	3	2.26082e+06	207	23.3165	5.46533
Q9VPY2	Phospholipase A2 activator protein, isoform A OS=Drosophila melanogaster GN=Plap PE=2 SV=1 - [Q9VPY2_DROME]	7.85039	2.8	1	2	2	3	964194	787	85.6971	5.8335
Q24133	DnaJ protein homolog 1 OS=Drosophila melanogaster GN=DnaJ-1 PE=1 SV=3 - [DNAJ1_DROME]	7.83746	6.89	1	2	2	3	5.28239e+06	334	37.005	8.85107
Q9U9Q1	Replication factor C 38kD subunit OS=Drosophila melanogaster GN=RfC38 PE=4 SV=1 - [Q9U9Q1_DROME]	7.8203	7.3	1	2	2	3	1.72819e+06	356	40.7892	8.39697
Q7KVY5	Shaggy, isoform K OS=Drosophila melanogaster GN=sgg PE=4 SV=1 - [Q7KVY5_DROME]	7.81919	4.09	10	1	1	2	1.83871e+06	416	43.315	8.01611
Q7K2X8	Nup44A, isoform A OS=Drosophila melanogaster GN=Nup44A PE=2 SV=1 - [Q7K2X8_DROME]	7.72684	3.67	1	1	1	3	579163	354	39.4896	6.7124
Q9V434	Asparaginyl-tRNA synthetase, isoform A OS=Drosophila melanogaster GN=Aats-asn PE=2 SV=1 - [Q9V434_DROME]	7.67813	4.12	1	2	2	3	1.19246e+06	558	63.8913	5.96045
Q9VMX7	Jonah 25Bi OS=Drosophila melanogaster GN=Jon25Bi PE=3 SV=1 - [Q9VMX7_DROME]	7.66354	14.29	1	3	3	3	4.60881e+06	266	28.7017	6.31592
Q7K2W6	GH04080p OS=Drosophila melanogaster GN=proPO-A1 PE=2 SV=1 - [Q7K2W6_DROME]	7.66009	4.78	1	2	2	2	1.44299e+06	690	79.0417	6.59521
A1ZAB5	Protein clueless OS=Drosophila melanogaster GN=clu PE=1 SV=1 - [CLU_DROME]	7.65504	2.76	1	3	3	3	1.52801e+06	1448	160.752	6.59521
Q9VTH0	Procollagen lysyl hydroxylase, isoform A OS=Drosophila melanogaster GN=Plod PE=4 SV=1 - [Q9VTH0_DROME]	7.6543	5.13	1	3	3	3	798925	721	82.4574	5.68115
Q8T3U2	40S ribosomal protein S23 OS=Drosophila melanogaster GN=RpS23 PE=1 SV=1 - [RS23_DROME]	7.64017	12.59	1	2	2	3	3.89635e+07	143	16.0068	10.5942
Q9W227	Peptidyl-prolyl cis-trans isomerase OS=Drosophila melanogaster GN=CG2852 PE=2 SV=1 - [Q9W227_DROME]	7.63595	16.59	1	1	2	2	3.0747e+06	205	22.1855	8.74854
Q9VVN2	Probable 28S ribosomal protein S26, mitochondrial OS=Drosophila melanogaster GN=mRpS26 PE=2 SV=1 - [RT26_DROME]	7.58884	6.22	1	1	1	2	1.97853e+06	225	26.2475	8.41162
Q7JZK1	CG7712 OS=Drosophila melanogaster GN=CG7712 PE=2 SV=1 - [Q7JZK1_DROME]	7.58271	16.13	1	2	2	3	3.92857e+06	124	14.8858	9.49561
Q9VCI0	Probable oligoribonuclease OS=Drosophila melanogaster GN=CG10214 PE=1 SV=1 - [ORN_DROME]	7.54829	6.16	1	1	1	3	1.66079e+06	211	24.2822	6.93213
O62602	Licorne OS=Drosophila melanogaster GN=lic PE=2 SV=1 - [O62602_DROME]	7.50989	3.89	1	1	1	3	2.00112e+06	334	38.1703	6.39209
Q961A8	LD25351p OS=Drosophila melanogaster GN=Papss PE=2 SV=1 - [Q961A8_DROME]	7.49405	2.86	3	1	1	2		629	71.1012	7.2251
Q9VW54	26S proteasome regulatory complex subunit p97 OS=Drosophila melanogaster GN=Rpn1 PE=2 SV=2 - [Q9VW54_DROME]	7.48375	3.7	1	3	3	3	1.13398e+07	919	102.212	5.84619
P40793	Cdc42 homolog OS=Drosophila melanogaster GN=Cdc42 PE=1 SV=1 - [CDC42_DROME]	7.46119	10.99	1	1	2	3	3.62382e+06	191	21.389	7.13721
Q9V427	Innexin inx2 OS=Drosophila melanogaster GN=Inx2 PE=1 SV=1 - [INX2_DROME]	7.45514	3.27	1	1	1	2	532368	367	42.4608	6.30322
Q9VN93-2	Isoform B of Putative cysteine proteinase CG12163 OS=Drosophila melanogaster GN=CG12163 - [CPR1_DROME]	7.44645	2.95	2	1	1	2	2.04081e+06	475	53.5117	8.04541
Q9V3I2	Drab5 OS=Drosophila melanogaster GN=Rab5 PE=2 SV=1 - [Q9V3I2_DROME]	7.43024	11.42	1	2	2	3	3.08325e+06	219	23.944	8.41162
B7Z036	Uninflatable, isoform B OS=Drosophila melanogaster GN=uif PE=4 SV=1 - [B7Z036_DROME]	7.39189	0.67	3	2	2	3	888322	3557	386.881	5.30029
Q9VZW7	CG2107 OS=Drosophila melanogaster GN=CG2107 PE=3 SV=1 - [Q9VZW7_DROME]	7.36432	3.6	1	2	2	3	1.63384e+06	667	75.0599	8.35303
Q9V3A7	Structural maintenance of chromosomes protein OS=Drosophila melanogaster GN=glu PE=2 SV=1 - [Q9V3A7_DROME]	7.35976	1.7	1	2	2	3	2.67383e+06	1409	159.784	6.15088
Q9VP13	CG7172 OS=Drosophila melanogaster GN=CG7172 PE=2 SV=1 - [Q9VP13_DROME]	7.35313	12.93	1	3	3	3	1.72109e+07	232	26.7641	9.53955
Q9VNF7	MTA1-like, isoform B OS=Drosophila melanogaster GN=MTA1-like PE=4 SV=2 - [Q9VNF7_DROME]	7.30748	3.67	3	3	3	3	1.02243e+06	844	92.7162	9.34912
P27619-2	Isoform 2 of Dynamin OS=Drosophila melanogaster GN=shi - [DYN_DROME]	7.3005	1.81	6	1	1	2	1.25822e+06	830	92.9723	8.23584
Q9NFU0-3	Isoform E of Fragile X mental retardation syndrome-related protein 1 OS=Drosophila melanogaster GN=Fmr1 - [FMR1_DROME]	7.28835	2.02	2	1	1	2	1.29364e+06	643	71.6926	9.12939
Q7K1Y4	Probable cytosolic iron-sulfur protein assembly protein Ciao1 OS=Drosophila melanogaster GN=Ciao1 PE=1 SV=1 - [CIAO1_DROME]	7.26937	13.73	1	3	3	3	869888	335	37.0209	5.2749
Q9VAW3	GH12731p OS=Drosophila melanogaster GN=Gfat2 PE=2 SV=1 - [Q9VAW3_DROME]	7.23671	1.46	1	1	1	3	2.39089e+06	683	76.4903	6.62451
Q9VLK2	Ribosomal L1 domain-containing protein CG13096 OS=Drosophila melanogaster GN=CG13096 PE=1 SV=1 - [Y3096_DROME]	7.20142	5.43	1	3	3	3	2.44114e+06	681	74.3189	8.51416
Q7KSM5	Aos1 OS=Drosophila melanogaster GN=Aos1 PE=2 SV=1 - [Q7KSM5_DROME]	7.1721	8.31	1	3	3	3	5.86869e+06	337	37.6497	5.43994
P32392	Actin-related protein 3 OS=Drosophila melanogaster GN=Arp3 PE=2 SV=3 - [ARP3_DROME]	7.16017	2.87	1	1	1	3	5.11147e+06	418	47.0028	5.98584
Q7K0E6	Aspartyl-tRNA synthetase OS=Drosophila melanogaster GN=Aats-asp PE=2 SV=1 - [Q7K0E6_DROME]	7.15469	6.21	1	3	3	3	2.71425e+06	531	59.0222	6.81494
Q9VAC4	CG7911 OS=Drosophila melanogaster GN=CG7911 PE=4 SV=1 - [Q9VAC4_DROME]	7.1353	12.82	1	1	1	2		156	17.3586	4.56396
Q8I0I5	Pop2, isoform B OS=Drosophila melanogaster GN=Pop2 PE=2 SV=1 - [Q8I0I5_DROME]	7.1351	4.44	3	1	1	2	1.23678e+06	293	33.4574	5.14795
Q9VIS3	Fructose-1,6-bisphosphatase OS=Drosophila melanogaster GN=fbp PE=2 SV=1 - [Q9VIS3_DROME]	7.09782	5.99	2	2	2	3	2.93616e+06	334	36.1736	6.80029
Q4V5H1	Peptidyl-prolyl cis-trans isomerase OS=Drosophila melanogaster GN=CG17266 PE=2 SV=1 - [Q4V5H1_DROME]	7.08242	7.65	1	1	1	2	1.58684e+06	183	20.1689	7.26904
P29327	40S ribosomal protein S6 OS=Drosophila melanogaster GN=RpS6 PE=1 SV=1 - [RS6_DROME]	7.04988	8.47	3	2	2	3	1.26588e+07	248	28.3899	10.7407
Q9GNH8	Hexokinase A, isoform B OS=Drosophila melanogaster GN=Hex-A PE=3 SV=1 - [Q9GNH8_DROME]	7.01557	2.68	2	1	1	3	693341	448	49.8831	5.80811
P25008	Cyclin-C OS=Drosophila melanogaster GN=CycC PE=1 SV=1 - [CCNC_DROME]	7.00333	4.12	1	1	1	3	1.68532e+06	267	31.2724	6.354
Q9VAG2	CG7802, isoform A OS=Drosophila melanogaster GN=neo PE=2 SV=1 - [Q9VAG2_DROME]	6.96771	3.09	1	2	2	3	2.49973e+06	744	83.0334	5.16064
Q24492	Replication protein A 70 kDa DNA-binding subunit OS=Drosophila melanogaster GN=RpA-70 PE=1 SV=1 - [RFA1_DROME]	6.95881	3.48	1	2	2	3	1.86881e+06	603	66.5824	6.75635
O61231	60S ribosomal protein L10 OS=Drosophila melanogaster GN=RpL10 PE=1 SV=1 - [RL10_DROME]	6.87295	9.63	1	2	2	3	972041	218	25.5112	9.84717
Q9VY28	Probable 28S ribosomal protein S25, mitochondrial OS=Drosophila melanogaster GN=mRpS25 PE=2 SV=1 - [RT25_DROME]	6.84884	13.17	1	2	2	3	2.93994e+06	167	19.1448	9.11475
Q9VAI0	Probable glucosamine 6-phosphate N-acetyltransferase OS=Drosophila melanogaster GN=CG1969 PE=2 SV=1 - [GNA1_DROME]	6.81818	17.81	2	3	3	3	1.13856e+06	219	24.4765	7.78174
Q9W1V3	rRNA 2'-O-methyltransferase fibrillarin OS=Drosophila melanogaster GN=Fib PE=2 SV=1 - [FBRL_DROME]	6.81013	10.76	1	3	3	3	8.06777e+06	344	34.6158	10.2866
Q7JZM8	39S ribosomal protein L41, mitochondrial OS=Drosophila melanogaster GN=mRpL41 PE=2 SV=1 - [RM41_DROME]	6.80613	9.64	1	1	1	2	3.31955e+06	166	18.5539	9.39307
Q9VMW9	GDP-mannose 4,6 dehydratase OS=Drosophila melanogaster GN=Gmd PE=1 SV=2 - [GMDS_DROME]	6.79488	3.8	1	1	1	2	1.03934e+06	395	44.7553	7.29834
Q9VVH5	AT13736p OS=Drosophila melanogaster GN=CG7580 PE=4 SV=1 - [Q9VVH5_DROME]	6.7878	20.22	1	2	2	3	6.00568e+06	89	10.0864	10.0815
P42284-1	Isoform M of Longitudinals lacking protein, isoforms H/M/V OS=Drosophila melanogaster GN=lola - [LOLA2_DROME]	6.7217	3.23	22	1	1	2	742481	465	49.2899	5.17334
Q9VDK7	Signal recognition particle subunit SRP72 OS=Drosophila melanogaster GN=Srp72 PE=2 SV=1 - [Q9VDK7_DROME]	6.70309	2	1	1	1	2	763783	650	72.806	9.05615
Q9VVA4	CG9674, isoform A OS=Drosophila melanogaster GN=CG9674 PE=2 SV=2 - [Q9VVA4_DROME]	6.70248	1.56	3	2	2	2	679499	2114	231.928	6.41748
Q9VN86	AT14148p OS=Drosophila melanogaster GN=CG2604 PE=2 SV=1 - [Q9VN86_DROME]	6.69908	3.26	1	1	1	2	893407	430	47.2262	8.96826
Q9VYV4	Amun, isoform A OS=Drosophila melanogaster GN=Amun PE=2 SV=1 - [Q9VYV4_DROME]	6.68215	3.82	1	2	2	3	1.39106e+06	550	58.3873	4.57666
Q9W0S6	IP18235p OS=Drosophila melanogaster GN=mRpL17 PE=2 SV=2 - [Q9W0S6_DROME]	6.6734	12.5	1	2	2	3	1.7e+06	176	20.8521	9.94971
Q9VAD0	Acid phosphatase 1, isoform A OS=Drosophila melanogaster GN=Acph-1 PE=2 SV=1 - [Q9VAD0_DROME]	6.61993	3.2	2	1	1	2	648464	438	50.1053	6.68311
Q7JR49	CG8029, isoform A OS=Drosophila melanogaster GN=VhaAC45 PE=2 SV=1 - [Q7JR49_DROME]	6.6117	3.43	1	1	1	3	2.46034e+06	379	41.0974	5.09717
Q9VF40	CG5614 OS=Drosophila melanogaster GN=CG5614 PE=2 SV=1 - [Q9VF40_DROME]	6.58964	3.35	1	1	1	3	8.59992e+06	358	41.0663	6.29053
Q7KVP4	CG9485, isoform A OS=Drosophila melanogaster GN=CG9485 PE=4 SV=1 - [Q7KVP4_DROME]	6.58854	1.56	4	2	2	3	1.47993e+06	1542	173.468	6.46826
Q9VPL3	39S ribosomal protein L10, mitochondrial OS=Drosophila melanogaster GN=mRpL10 PE=2 SV=1 - [RM10_DROME]	6.5884	6.05	1	1	1	2	915790	248	28.3191	10.0669
Q8INB9-2	Isoform A of RAC serine/threonine-protein kinase OS=Drosophila melanogaster GN=Akt1 - [AKT1_DROME]	6.57665	2.08	2	1	1	3		530	59.8733	5.87158
Q9VYS3	Regulator of nonsense transcripts 1 homolog OS=Drosophila melanogaster GN=Upf1 PE=1 SV=2 - [RENT1_DROME]	6.55216	1.95	1	2	2	3	1.27128e+06	1180	129.831	7.32764
P54397	39 kDa FK506-binding nuclear protein OS=Drosophila melanogaster GN=FK506-bp1 PE=1 SV=2 - [FKB39_DROME]	6.5442	5.04	1	2	2	3	2.34077e+07	357	39.3194	4.79248
Q9V9M7	RE62581p OS=Drosophila melanogaster GN=RpL21 PE=1 SV=1 - [Q9V9M7_DROME]	6.51991	18.87	1	3	3	3	7.07839e+06	159	18.4642	10.5503
Q9VCX3	Probable 39S ribosomal protein L45, mitochondrial OS=Drosophila melanogaster GN=mRpL45 PE=2 SV=1 - [RM45_DROME]	6.41411	5.26	1	2	2	3	1.16184e+06	361	41.5847	9.23193
Q9VXQ3	CG8239 OS=Drosophila melanogaster GN=CG8239 PE=2 SV=1 - [Q9VXQ3_DROME]	6.38409	3.87	1	1	1	2	836044	388	42.8056	6.82959
Q9XZ19	CG3909 OS=Drosophila melanogaster GN=CG3909 PE=2 SV=1 - [Q9XZ19_DROME]	6.36918	3.93	1	1	1	2	734444	331	36.0776	5.24951
M9PH39	Nejire, isoform E OS=Drosophila melanogaster GN=nej PE=4 SV=1 - [M9PH39_DROME]	6.34209	0.73	3	1	1	3	3.69717e+06	3266	339.463	8.68994
Q9VQR9	CG17593, isoform A OS=Drosophila melanogaster GN=CG17593-RA PE=2 SV=1 - [Q9VQR9_DROME]	6.32991	4.62	1	2	2	3	1.34173e+06	476	54.1201	5.30029
Q9VH72	CG9471, isoform A OS=Drosophila melanogaster GN=CG9471-RA PE=2 SV=1 - [Q9VH72_DROME]	6.30368	10.78	1	2	2	3	2.29836e+06	204	22.699	7.48877
O01382	Caspase OS=Drosophila melanogaster GN=Ice PE=1 SV=2 - [ICE_DROME]	6.29784	6.78	2	2	2	2	7.38714e+06	339	37.3392	7.06396
P05389	60S acidic ribosomal protein P2 OS=Drosophila melanogaster GN=RpLP2 PE=1 SV=1 - [RLA2_DROME]	6.27659	17.7	1	2	2	3	1.11771e+07	113	11.75	4.70361
Q8T6B9	Poly(U)-binding-splicing factor half pint OS=Drosophila melanogaster GN=pUf68 PE=1 SV=2 - [PUF68_DROME]	6.27168	3.92	1	2	2	2	694997	637	67.8969	5.96045
Q7KUA4	LD22577p OS=Drosophila melanogaster GN=Uba2 PE=2 SV=1 - [Q7KUA4_DROME]	6.25915	3.14	1	2	2	3	2.98058e+06	700	77.5627	5.021
Q9TVM2	Exportin-1 OS=Drosophila melanogaster GN=emb PE=1 SV=1 - [XPO1_DROME]	6.22813	1.13	1	1	1	2	1.69649e+06	1063	122.72	5.87158
P15278-2	Isoform B of Fasciclin-3 OS=Drosophila melanogaster GN=Fas3 - [FAS3_DROME]	6.20338	3.24	4	1	1	2	1.36139e+06	401	44.1545	5.96045
Q9VPX5	CG4764 OS=Drosophila melanogaster GN=Vps29 PE=2 SV=1 - [Q9VPX5_DROME]	6.19859	7.14	1	1	1	2	1.7923e+06	182	20.4607	7.00537
Q9VM71	5'-3' exoribonuclease 2 homolog OS=Drosophila melanogaster GN=Rat1 PE=1 SV=2 - [XRN2_DROME]	6.15426	1.43	1	1	1	2	2.06668e+06	908	103.895	7.04932
Q9VF27	GM02062p OS=Drosophila melanogaster GN=ND23 PE=2 SV=1 - [Q9VF27_DROME]	6.1516	10.6	1	2	2	3	3.15476e+06	217	24.5621	5.88428
Q86BQ4	CG2862, isoform B OS=Drosophila melanogaster GN=CG2862 PE=4 SV=1 - [Q86BQ4_DROME]	6.10187	11.11	2	1	1	2	1.76866e+07	126	13.8362	7.23975
P15357	Ubiquitin-40S ribosomal protein S27a OS=Drosophila melanogaster GN=RpS27A PE=1 SV=2 - [RS27A_DROME]	6.09642	18.59	5	2	2	2	1.79178e+07	156	17.9286	9.77393
Q9VW26	Ornithine aminotransferase, mitochondrial OS=Drosophila melanogaster GN=Oat PE=2 SV=1 - [OAT_DROME]	6.05777	5.8	1	2	2	2	1.23086e+06	431	47.2813	7.04932
Q9VCD8	Structural maintenance of chromosomes protein OS=Drosophila melanogaster GN=SMC1 PE=2 SV=1 - [Q9VCD8_DROME]	6.0513	1.13	1	1	1	2	761328	1238	142.792	6.72705
Q7JVH6	CG9436 OS=Drosophila melanogaster GN=CG9436 PE=2 SV=1 - [Q7JVH6_DROME]	6.0461	8.36	1	2	2	2	1.66764e+06	311	35.3957	6.75635
O44437	Small nuclear ribonucleoprotein Sm D3 OS=Drosophila melanogaster GN=SmD3 PE=1 SV=1 - [SMD3_DROME]	6.02844	12.58	1	1	2	3	2.414e+07	151	15.5721	10.5356
Q9VD58	CG6439, isoform A OS=Drosophila melanogaster GN=CG6439 PE=2 SV=1 - [Q9VD58_DROME]	6.01848	3.51	1	1	1	2	2.28352e+06	370	40.3559	8.54346
Q9VVU5	COP9 signalosome complex subunit 1b OS=Drosophila melanogaster GN=CSN1b PE=2 SV=1 - [CSN1_DROME]	6.00436	4.38	1	2	2	2	2.50707e+06	525	58.1774	6.82959
Q9VLB7	GDP dissociation inhibitor, isoform A OS=Drosophila melanogaster GN=Gdi PE=2 SV=1 - [Q9VLB7_DROME]	5.99922	2.71	1	1	1	2	852846	443	49.8714	5.71924
Q9VWV2	CG32549, isoform D OS=Drosophila melanogaster GN=CG32549 PE=3 SV=2 - [Q9VWV2_DROME]	5.97268	2.24	4	1	1	2	1.66771e+06	581	66.1593	6.49365
Q9VLR5	RNA polymerase II transcriptional coactivator OS=Drosophila melanogaster GN=Ssb-c31a PE=2 SV=1 - [TCP4_DROME]	5.96699	23.64	1	2	2	2	915346	110	12.1813	9.17334
Q86PD3	CG30022 OS=Drosophila melanogaster GN=CG30022;CG30023 PE=2 SV=1 - [Q86PD3_DROME]	5.95591	8.96	1	2	2	2	582354	279	31.3817	6.93213
Q09332	UDP-glucose:glycoprotein glucosyltransferase OS=Drosophila melanogaster GN=Ugt PE=1 SV=2 - [UGGG_DROME]	5.89531	1.61	1	2	2	2	1.81289e+06	1548	174.245	6.15088
Q9VA73-3	Isoform 3 of Calcium-binding mitochondrial carrier protein Aralar1 OS=Drosophila melanogaster GN=aralar1 - [CMC_DROME]	5.86986	1.62	3	1	1	2	1.04253e+06	679	74.8558	8.55811
Q9VXX8	Probable 60S ribosomal protein L37-A OS=Drosophila melanogaster GN=RpL37a PE=1 SV=1 - [RL371_DROME]	5.81392	12.9	1	1	1	2	1.47476e+07	93	10.6366	11.6929
Q9W032	Protein SGT1 homolog ecdysoneless OS=Drosophila melanogaster GN=ecd PE=1 SV=1 - [SGT1_DROME]	5.81198	4.24	1	2	2	2	766386	684	77.8594	4.86865
Q7KLW9	BcDNA.LD02793 OS=Drosophila melanogaster GN=Prp19 PE=2 SV=1 - [Q7KLW9_DROME]	5.74267	2.57	1	1	1	2	815139	505	55.1644	6.90283
Q9W2E7	Rae1 OS=Drosophila melanogaster GN=Rae1 PE=4 SV=1 - [Q9W2E7_DROME]	5.73597	3.47	1	1	1	2	6.44885e+06	346	38.5927	7.57666
Q9W3U9	CG14434 OS=Drosophila melanogaster GN=CG14434 PE=2 SV=1 - [Q9W3U9_DROME]	5.70805	14.97	1	2	2	2	1.10885e+06	187	21.1389	5.32568
A1Z992	CG33138 OS=Drosophila melanogaster GN=AGBE PE=4 SV=1 - [A1Z992_DROME]	5.70238	4.38	1	1	2	2	846549	685	79.0596	6.25244
Q9VTL1	PCI domain-containing protein 2 homolog OS=Drosophila melanogaster GN=PCID2 PE=1 SV=2 - [PCID2_DROME]	5.66667	2.53	1	1	1	2	579152	395	45.1504	8.39697
Q9VL71	LD29830p OS=Drosophila melanogaster GN=Srp54 PE=2 SV=1 - [Q9VL71_DROME]	5.64712	4.68	1	2	2	2	2.26136e+06	513	58.3305	11.3267
M9PFW8	CG32165, isoform B OS=Drosophila melanogaster GN=CG32165 PE=4 SV=1 - [M9PFW8_DROME]	5.58559	2.08	4	2	2	2	927274	1059	118.783	4.80518
Q8SX57	CG31549 OS=Drosophila melanogaster GN=CG11005 PE=2 SV=1 - [Q8SX57_DROME]	5.57255	5.45	1	1	1	2	2.14386e+06	257	26.9161	7.09326
Q9VRP3	AT08565p OS=Drosophila melanogaster GN=Txl PE=2 SV=1 - [Q9VRP3_DROME]	5.5685	8.01	1	2	2	2	4.46196e+06	287	31.7079	5.8335
Q9VKW5	CG5355 OS=Drosophila melanogaster GN=CG5355 PE=2 SV=2 - [Q9VKW5_DROME]	5.50917	3.31	1	2	2	2	1.35219e+06	756	86.2574	6.18896
Q7KK96	Structural maintenance of chromosomes protein OS=Drosophila melanogaster GN=SMC2 PE=2 SV=1 - [Q7KK96_DROME]	5.47184	0.85	1	1	1	2		1179	134.251	8.17725
P22464	Annexin B9 OS=Drosophila melanogaster GN=AnxB9 PE=2 SV=2 - [ANXB9_DROME]	5.4628	3.7	3	1	1	2	2.76934e+06	324	36.0352	4.88135
Q95028	L-lactate dehydrogenase OS=Drosophila melanogaster GN=ImpL3 PE=2 SV=1 - [LDH_DROME]	5.42778	7.83	1	2	2	2	3.77359e+06	332	35.5146	7.07861
Q9VKM3	Lethal (2) 06225, isoform A OS=Drosophila melanogaster GN=l(2)06225 PE=4 SV=1 - [Q9VKM3_DROME]	5.39379	15.15	1	1	1	2		99	10.8649	9.75928
Q86BY9	Protein rigor mortis OS=Drosophila melanogaster GN=rig PE=1 SV=1 - [RIG_DROME]	5.38478	0.89	1	1	1	2	2.50534e+06	1235	137.741	6.771
Q9VTW1	CG4300, isoform B OS=Drosophila melanogaster GN=CG4300 PE=2 SV=1 - [Q9VTW1_DROME]	5.37247	5.74	2	2	2	2	3.7465e+06	366	42.0015	5.08447
P32234	GTP-binding protein 128up OS=Drosophila melanogaster GN=128up PE=2 SV=2 - [128UP_DROME]	5.3383	6.25	1	2	2	2	1.42611e+06	368	41.1058	8.60205
Q9W2V9	LD40707p OS=Drosophila melanogaster GN=l(1)G0289 PE=2 SV=1 - [Q9W2V9_DROME]	5.3306	4	1	2	2	2	4.09523e+06	625	67.2473	7.02002
Q9VB55	Without children, isoform A OS=Drosophila melanogaster GN=woc PE=4 SV=2 - [Q9VB55_DROME]	5.32631	1.3	2	2	2	2	1789624	1688	187.277	4.75439
Q7K4Q9	HMG coenzyme A synthase, isoform A OS=Drosophila melanogaster GN=Hmgs PE=2 SV=1 - [Q7K4Q9_DROME]	5.29155	3.01	1	1	1	2	354258	465	51.1447	6.31592
Q9U4L6	Mitochondrial import receptor subunit TOM40 homolog 1 OS=Drosophila melanogaster GN=Tom40 PE=2 SV=2 - [TO401_DROME]	5.27742	3.78	1	1	1	2		344	36.3134	7.09326
Q8MKK1	CG30185 OS=Drosophila melanogaster GN=CG30185;Gr59f PE=2 SV=1 - [Q8MKK1_DROME]	5.2731	6.15	1	1	1	2	1.78647e+06	179	19.9673	7.03467
Q27884	Serine/threonine-protein phosphatase 6 catalytic subunit OS=Drosophila melanogaster GN=PpV PE=2 SV=1 - [PPP6_DROME]	5.24063	3.3	1	1	1	2	3.77069e+06	303	34.7363	5.70654
A1Z843	CG1371 OS=Drosophila melanogaster GN=CG1371 PE=4 SV=1 - [A1Z843_DROME]	5.23056	2.25	1	2	2	2	687471	1199	130.81	7.2251
M9PFG7	Kinesin light chain, isoform C OS=Drosophila melanogaster GN=Klc PE=4 SV=1 - [M9PFG7_DROME]	5.21323	5.33	2	2	2	2	2.37823e+06	507	57.8803	6.16357
Q9VMY1	Probable 39S ribosomal protein L24, mitochondrial OS=Drosophila melanogaster GN=mRpL24 PE=1 SV=1 - [RM24_DROME]	5.20709	4.45	1	1	1	2	2.01394e+06	247	29.1982	9.37842
Q8IND1	Arpc3A, isoform D OS=Drosophila melanogaster GN=Arpc3A PE=2 SV=2 - [Q8IND1_DROME]	5.17883	15.63	2	2	2	2	1.16358e+06	160	18.2694	8.90967
Q95SY7	LD39266p OS=Drosophila melanogaster GN=Sar1 PE=2 SV=1 - [Q95SY7_DROME]	5.1765	16.13	2	2	2	2	3.57341e+06	155	17.4769	5.92236
Q9W1I7	CG5554 OS=Drosophila melanogaster GN=CG5554 PE=2 SV=1 - [Q9W1I7_DROME]	5.13377	6.81	1	2	2	2	5.28371e+06	323	36.3217	4.58936
Q24179	Protein sly1 homolog OS=Drosophila melanogaster GN=Slh PE=2 SV=4 - [SLY1_DROME]	5.13367	2.03	1	1	1	2	656718	639	72.3202	6.18896
Q9VUJ0	39S ribosomal protein L39, mitochondrial OS=Drosophila melanogaster GN=mRpL39 PE=1 SV=2 - [RM39_DROME]	5.10628	3.6	1	1	1	2	831142	333	37.301	8.6167
P18935	Cytochrome b OS=Drosophila melanogaster GN=mt:Cyt-b PE=3 SV=1 - [CYB_DROME]	5.07575	2.38	1	1	1	2	2.72997e+06	378	43.196	8.49951
Q9VEK8	GH07711p OS=Drosophila melanogaster GN=sds22 PE=2 SV=1 - [Q9VEK8_DROME]	5.05276	7.67	1	2	2	2	2.32609e+06	326	37.7674	5.03369
Q8MT58	CG17337 OS=Drosophila melanogaster GN=CG17337 PE=2 SV=1 - [Q8MT58_DROME]	5.03546	4.6	1	2	2	2	2.79731e+06	478	53.1303	5.65576
Q9VXT7	Probable isoaspartyl peptidase/L-asparaginase CG7860 OS=Drosophila melanogaster GN=CG7860 PE=1 SV=1 - [ASGL1_DROME]	5.02587	8.13	1	2	2	2	1.21684e+06	332	34.8394	5.69385
A1ZA89	Dystroglycan, isoform B OS=Drosophila melanogaster GN=Dg PE=4 SV=1 - [A1ZA89_DROME]	5.01675	1.42	3	1	1	2	950088	914	102.57	6.3667
Q9VWI3	IP02458p OS=Drosophila melanogaster GN=mRpS14 PE=2 SV=2 - [Q9VWI3_DROME]	5.00633	9.38	1	1	1	2	1.76928e+06	128	14.8239	10.6968
Q8SZF4	CG9460 OS=Drosophila melanogaster GN=Spn42De PE=2 SV=1 - [Q8SZF4_DROME]	5.00233	2.72	1	1	1	2	1627973	404	44.5081	5.41455
Q9V3T8	LD32469p OS=Drosophila melanogaster GN=SC35 PE=2 SV=1 - [Q9V3T8_DROME]	4.99853	5.64	1	1	1	2		195	21.3868	11.7515
O61380	Eukaryotic translation initiation factor 4G, isoform A OS=Drosophila melanogaster GN=eIF4G PE=2 SV=3 - [O61380_DROME]	4.96474	1.38	2	2	2	2	1.58061e+06	1666	183.829	7.82568
Q9VMI3	CG9140 OS=Drosophila melanogaster GN=CG9140 PE=2 SV=1 - [Q9VMI3_DROME]	4.96315	4.22	2	2	2	2	1.29291e+07	474	51.7973	8.47021
Q0KI98	FI06027p OS=Drosophila melanogaster GN=Aats-trp PE=2 SV=1 - [Q0KI98_DROME]	4.9565	3.02	1	1	1	2	618421	430	47.9408	6.85889
Q9VB10	CG5590 OS=Drosophila melanogaster GN=CG5590 PE=2 SV=1 - [Q9VB10_DROME]	4.94098	5.58	1	1	1	1	1.83915e+06	412	44.3257	8.01611
Q9VLM5	Dolichyl-diphosphooligosaccharide--protein glycosyltransferase subunit DAD1 OS=Drosophila melanogaster GN=l(2)k12914 PE=3 SV=1 - [DAD1_DROME]	4.89254	9.82	1	1	1	2	2.61554e+06	112	12.5176	8.17725
P02299	Histone H3 OS=Drosophila melanogaster GN=His3 PE=1 SV=4 - [H3_DROME]	4.87853	6.62	2	1	1	2	1.61799e+07	136	15.3785	11.2681
Q9VMX3	CG3756 OS=Drosophila melanogaster GN=CG3756 PE=2 SV=1 - [Q9VMX3_DROME]	4.77301	6.61	1	2	2	2	6.34123e+06	333	38.1137	6.7417
Q9VN50	Eukaryotic translation initiation factor 3 subunit F-1 OS=Drosophila melanogaster GN=eIF3-S5-1 PE=2 SV=1 - [EI3F1_DROME]	4.75363	3.93	1	1	1	2	7.94542e+06	280	31.085	6.52197
P17917	Proliferating cell nuclear antigen OS=Drosophila melanogaster GN=PCNA PE=1 SV=2 - [PCNA_DROME]	4.75258	7.31	1	2	2	2	7.80101e+06	260	28.8111	4.80518
Q9VTZ6	Probable phosphomannomutase OS=Drosophila melanogaster GN=CG10688 PE=2 SV=1 - [PMM_DROME]	4.74906	5.12	1	1	1	2		254	29.648	5.70654
Q9VI04	Beta-alanine synthase OS=Drosophila melanogaster GN=pyd3 PE=1 SV=2 - [Q9VI04_DROME]	4.74306	6.74	1	2	2	2	931674	386	43.7719	6.85889
D0Z726	MIP14975p OS=Drosophila melanogaster GN=Ntf-2 PE=4 SV=1 - [D0Z726_DROME]	4.74192	29.21	4	2	2	2	3.78605e+06	89	9.88009	6.93213
Q9V429-2	Isoform Short of Thioredoxin-2 OS=Drosophila melanogaster GN=Trx-2 - [THIO2_DROME]	4.72333	10.38	1	1	1	2	5.03544e+06	106	11.729	4.88135
Q9VP47	Pre-rRNA-processing protein TSR1 homolog OS=Drosophila melanogaster GN=CG7338 PE=1 SV=1 - [TSR1_DROME]	4.70308	1.35	1	1	1	2	1.19793e+06	814	93.6582	6.87354
B7Z005	Drongo, isoform I OS=Drosophila melanogaster GN=drongo PE=4 SV=2 - [B7Z005_DROME]	4.68545	1.95	3	1	1	2	5.4676e+08	514	55.2616	7.97217
Q9VGZ3	Iron regulatory protein 1B OS=Drosophila melanogaster GN=Irp-1B PE=4 SV=1 - [Q9VGZ3_DROME]	4.68331	1.33	1	1	1	2	1.37768e+06	899	98.5165	5.94775
Q9VV60	LD21116p OS=Drosophila melanogaster GN=Aats-tyr PE=2 SV=1 - [Q9VV60_DROME]	4.65101	4.76	1	2	2	2	1.00706e+06	525	58.1225	6.87354
Q9VZD5	Probable 28S ribosomal protein S6, mitochondrial OS=Drosophila melanogaster GN=mRpS6 PE=2 SV=1 - [RT06_DROME]	4.60005	6.8	1	1	1	2		147	17.0041	9.1001
P41043	Glutathione S-transferase S1 OS=Drosophila melanogaster GN=GstS1 PE=1 SV=2 - [GST1_DROME]	4.59889	10.44	1	2	2	2	1.44633e+06	249	27.596	4.65283
P37276-2	Isoform C of Dynein heavy chain, cytoplasmic OS=Drosophila melanogaster GN=Dhc64C - [DYHC_DROME]	4.59237	0.5	8	2	2	2	668931	4638	529.572	6.31592
P91620-1	Isoform SIF type 2 of Protein still life, isoforms C/SIF type 2 OS=Drosophila melanogaster GN=sif - [SIF2_DROME]	4.53824	0.63	4	1	1	2		2052	228.811	8.77783
Q9VTV9	Delta-aminolevulinic acid dehydratase OS=Drosophila melanogaster GN=Pbgs PE=2 SV=1 - [Q9VTV9_DROME]	4.53504	5.81	1	2	2	2	3.18811e+06	327	35.9102	7.48877
Q9V9W4	CG1774 OS=Drosophila melanogaster GN=CG1774 PE=2 SV=1 - [Q9V9W4_DROME]	4.51961	3.81	1	1	1	2	2.05701e+06	472	53.9999	9.24658
Q9VSS2	Signal recognition particle subunit SRP68 OS=Drosophila melanogaster GN=Srp68 PE=2 SV=1 - [SRP68_DROME]	4.51798	3.31	1	2	2	2	792510	604	68.9657	8.47021
P40792	Ras-related protein Rac1 OS=Drosophila melanogaster GN=Rac1 PE=1 SV=2 - [RAC1_DROME]	4.50249	10.94	2	1	2	2	3.43891e+06	192	21.3401	8.33838
Q9V3U2	H/ACA ribonucleoprotein complex subunit 2-like protein OS=Drosophila melanogaster GN=NHP2 PE=1 SV=1 - [NHP2_DROME]	4.45901	6.25	1	1	1	2	1.82571e+07	160	17.7122	8.104
A1Z6H7	Gp210 OS=Drosophila melanogaster GN=Gp210 PE=4 SV=1 - [A1Z6H7_DROME]	4.43134	0.64	1	1	1	2	748157	1876	209.661	6.46826
Q8SY53	GH11935p OS=Drosophila melanogaster GN=Ostgamma PE=2 SV=1 - [Q8SY53_DROME]	4.4296	3.33	1	1	1	2	798941	330	36.9864	9.96436
Q9W212	CG30259, isoform A OS=Drosophila melanogaster GN=CG30259 PE=4 SV=3 - [Q9W212_DROME]	4.42646	4.44	2	2	2	2	8.28438e+06	540	63.1472	7.2251
Q24297	Small nuclear ribonucleoprotein F OS=Drosophila melanogaster GN=SmF PE=1 SV=2 - [RUXF_DROME]	4.41107	9.09	1	1	1	2	4.97318e+06	88	9.73278	4.53857
Q9V6U8	Nedd8-activating enzyme E1 catalytic subunit OS=Drosophila melanogaster GN=Uba3 PE=1 SV=1 - [UBA3_DROME]	4.38817	2.67	1	1	1	2	1.16468e+06	450	50.0001	5.41455
Q9W4M9	tRNA (cytosine(34)-C(5))-methyltransferase OS=Drosophila melanogaster GN=Nsun2 PE=2 SV=1 - [NSUN2_DROME]	4.35863	3.49	1	1	2	2	3.9204e+06	746	84.109	6.82959
P21914	Succinate dehydrogenase [ubiquinone] iron-sulfur subunit, mitochondrial OS=Drosophila melanogaster GN=SdhB PE=2 SV=2 - [SDHB_DROME]	4.34252	6.73	2	2	2	2	1.11728e+06	297	33.7189	8.66064
Q9VH95	Uncharacterized protein CG16817 OS=Drosophila melanogaster GN=CG16817 PE=1 SV=1 - [YC17_DROME]	4.3407	7.07	1	1	1	2	3.7298e+06	184	20.7399	4.60205
Q8I8V0	Transcriptional adapter 2B OS=Drosophila melanogaster GN=Ada2b PE=1 SV=1 - [TAD2B_DROME]	4.33452	3.78	1	1	1	2	1.8156e+06	555	61.9923	7.09326
Q7JVK6	GM27569p OS=Drosophila melanogaster GN=trsn PE=1 SV=1 - [Q7JVK6_DROME]	4.32712	3.83	1	1	1	2	3.96351e+06	235	27.0091	5.50342
Q9W415	tRNA (guanine-N(7)-)-methyltransferase non-catalytic subunit wuho OS=Drosophila melanogaster GN=wuho PE=2 SV=1 - [WUHO_DROME]	4.32663	2.36	1	1	1	2	3.54532e+06	424	46.4694	5.33838
Q7KSW3	CG31472, isoform B OS=Drosophila melanogaster GN=CG31472 PE=3 SV=1 - [Q7KSW3_DROME]	4.32072	10.55	2	2	2	2	3.22346e+06	237	26.7708	6.81494
Q9VC49	DNA-directed RNA polymerases I, II, and III subunit RPABC5 OS=Drosophila melanogaster GN=Rpb10 PE=1 SV=1 - [RPAB5_DROME]	4.2987	13.43	1	1	1	2	6.6587e+06	67	7.65598	7.76709
Q86B97	Midline fasciclin, isoform H OS=Drosophila melanogaster GN=mfas PE=4 SV=1 - [Q86B97_DROME]	4.28767	1.23	6	1	1	2	419021	815	90.4869	5.59229
Q8MS31	CG34415, isoform D OS=Drosophila melanogaster GN=mute PE=2 SV=1 - [Q8MS31_DROME]	4.28701	1.35	2	1	1	2	5.72719e+08	665	74.4151	6.55127
Q9VWN5	Protein FAM188A homolog OS=Drosophila melanogaster GN=CG7332 PE=1 SV=1 - [F188A_DROME]	4.28687	1.79	1	1	1	2	1.36012e+06	560	61.7158	5.92236
Q8T079	Putative oxidoreductase GLYR1 homolog OS=Drosophila melanogaster GN=CG4747 PE=1 SV=1 - [GLYR1_DROME]	4.26578	1.99	2	1	1	2	2.44701e+06	602	65.211	6.1001
Q9VGF7	CG18347 OS=Drosophila melanogaster GN=GC1 PE=2 SV=1 - [Q9VGF7_DROME]	4.26367	3.74	1	1	1	2	906369	321	34.5343	9.5542
Q9VJZ1	CG9302 OS=Drosophila melanogaster GN=CG9302-RA PE=2 SV=1 - [Q9VJZ1_DROME]	4.26129	4.31	1	2	2	2	1.71409e+06	510	57.9095	8.77783
P40320-4	Isoform 4 of S-adenosylmethionine synthase OS=Drosophila melanogaster GN=Sam-S - [METK_DROME]	4.24399	4.46	3	1	1	1	2.18538e+06	381	42.1694	6.59521
Q9V6B9	Probable nucleoporin Nup54 OS=Drosophila melanogaster GN=Nup54 PE=2 SV=1 - [NUP54_DROME]	4.23471	3.77	1	2	2	2	1.65477e+06	610	64.3565	8.5874
Q9VX91	E3 ubiquitin-protein ligase UBR1 OS=Drosophila melanogaster GN=UBR1 PE=2 SV=2 - [UBR1_DROME]	4.22167	1.21	1	2	2	2	1.81683e+08	1824	208.225	6.43018
Q7K0B6	CG30000 OS=Drosophila melanogaster GN=GstT1 PE=2 SV=1 - [Q7K0B6_DROME]	4.2168	4.82	1	1	1	2	1.40487e+06	228	26.5549	8.96826
Q9VR43	AT09986p OS=Drosophila melanogaster GN=CG15625 PE=2 SV=1 - [Q9VR43_DROME]	4.20305	3.72	1	1	1	3	1.57439e+06	349	41.7328	8.00146
Q9VG69	CG5844 OS=Drosophila melanogaster GN=CG5844 PE=2 SV=1 - [Q9VG69_DROME]	4.19786	5.82	1	2	2	2	1.19821e+06	378	41.5931	5.68115
Q962I2	RAL2 OS=Drosophila melanogaster GN=Rala PE=2 SV=1 - [Q962I2_DROME]	4.19706	13.71	2	2	2	2	610402	197	22.4223	5.75732
Q9XZU1	Exportin-2 OS=Drosophila melanogaster GN=Cas PE=2 SV=2 - [XPO2_DROME]	4.17889	2.36	1	2	2	2	3.05974e+06	975	110.098	5.8208
P52034	6-phosphofructokinase OS=Drosophila melanogaster GN=Pfk PE=2 SV=2 - [K6PF_DROME]	4.17782	3.05	3	2	2	2	791548	788	86.5927	6.82959
Q7KV89	Misshapen, isoform G OS=Drosophila melanogaster GN=msn PE=4 SV=2 - [Q7KV89_DROME]	4.1756	0.91	6	1	1	2	2.36434e+06	1101	120.543	7.85498
Q9W3S4	CG4617, isoform A OS=Drosophila melanogaster GN=CG4617 PE=2 SV=2 - [Q9W3S4_DROME]	4.16742	2.87	1	1	1	2	7.38559e+06	418	45.6955	9.48096
Q7K127	CG7997, isoform A OS=Drosophila melanogaster GN=CG7997 PE=2 SV=1 - [Q7K127_DROME]	4.16413	3.6	1	1	1	1	1.3733e+06	417	47.3733	5.41455
P50887	60S ribosomal protein L22 OS=Drosophila melanogaster GN=RpL22 PE=1 SV=2 - [RL22_DROME]	4.15252	3.68	1	1	1	2	5.75258e+06	299	30.5919	10.1108
Q9VXG8	Serine/threonine-protein kinase ATR OS=Drosophila melanogaster GN=mei-41 PE=1 SV=2 - [ATR_DROME]	4.11484	0.91	6	1	2	2	8.96769e+06	2517	289.144	7.56201
Q9VQ94	Ghost, isoform A OS=Drosophila melanogaster GN=Sec24CD PE=2 SV=2 - [Q9VQ94_DROME]	4.11429	1.34	2	1	1	1	663109	1193	129.188	7.25439
Q9W3M7	CG10777 OS=Drosophila melanogaster GN=CG10777 PE=2 SV=1 - [Q9W3M7_DROME]	4.08128	2.75	1	1	2	2	5.20204e+06	945	100.356	9.14404
Q7KTG2	CG15828 OS=Drosophila melanogaster GN=Apoltp PE=4 SV=2 - [Q7KTG2_DROME]	4.06427	0.35	1	1	1	1	912386	4333	494.01	6.32861
M9MRD4	Muscle-specific protein 300, isoform B OS=Drosophila melanogaster GN=Msp300 PE=4 SV=1 - [M9MRD4_DROME]	4.05848	0.37	6	1	2	2	6.46845e+07	8382	957.772	5.49072
Q9VUH8	CG13472 OS=Drosophila melanogaster GN=Tdrd3 PE=2 SV=1 - [Q9VUH8_DROME]	4.04975	1.79	1	1	1	2	6.95416e+07	836	91.6722	9.5835
Q7KVX5	Vap-33-1, isoform A OS=Drosophila melanogaster GN=Vap-33A PE=4 SV=1 - [Q7KVX5_DROME]	4.04932	4.26	3	1	1	2	1.48732e+07	235	26.7543	8.38232
Q05783	High mobility group protein D OS=Drosophila melanogaster GN=HmgD PE=1 SV=1 - [HMGD_DROME]	4.0336	15.18	1	1	1	1	1.53404e+06	112	12.4083	9.20264
A1Z6Z7	CG1620, isoform A OS=Drosophila melanogaster GN=CG1620 PE=4 SV=1 - [A1Z6Z7_DROME]	3.99933	2.05	1	1	1	2	1.0009e+07	586	63.9421	4.55127
Q9V3P3	LD45860p OS=Drosophila melanogaster GN=REG PE=2 SV=1 - [Q9V3P3_DROME]	3.99467	5.31	1	1	1	1	1.59245e+06	245	28.1039	6.04932
Q9V3N7	BcDNA.HL02693 OS=Drosophila melanogaster GN=CRMP PE=2 SV=1 - [Q9V3N7_DROME]	3.99246	3.74	2	2	2	2	2.23305e+06	589	64.3896	7.02002
P05990-2	Isoform B of CAD protein OS=Drosophila melanogaster GN=r - [PYR1_DROME]	3.98461	1.66	2	2	2	2		1386	153.19	5.92236
Q9V3D2	Oxygen-dependent coproporphyrinogen-III oxidase OS=Drosophila melanogaster GN=Coprox PE=1 SV=1 - [HEM6_DROME]	3.95706	5.13	1	2	2	2	3.73311e+06	390	44.3913	8.71924
Q9W1J0	Transporter OS=Drosophila melanogaster GN=CG5549 PE=3 SV=2 - [Q9W1J0_DROME]	3.91431	2.36	1	2	2	2	2.39238e+06	1188	122.351	9.49561
P83099	Putative protein kinase C delta type homolog OS=Drosophila melanogaster GN=Pkcdelta PE=2 SV=3 - [KPC4_DROME]	3.91185	3.43	1	1	1	2	7.17214e+06	671	76.284	8.51416
Q9VVJ7	CG7484 OS=Drosophila melanogaster GN=CG7484 PE=1 SV=2 - [Q9VVJ7_DROME]	3.85189	7.3	1	1	1	1	1.02471e+06	178	19.8679	5.65576
Q7JV69	SD11922p OS=Drosophila melanogaster GN=Spn55B PE=2 SV=1 - [Q7JV69_DROME]	3.83686	4.01	1	1	1	1	3.65078e+06	374	42.1214	5.30029
P54622	Single-stranded DNA-binding protein, mitochondrial OS=Drosophila melanogaster GN=mtSSB PE=1 SV=2 - [SSBP_DROME]	3.83511	9.59	1	1	1	1	2.07837e+06	146	16.3575	9.84717
Q9VKD6	AT13028p OS=Drosophila melanogaster GN=dgt2 PE=2 SV=1 - [Q9VKD6_DROME]	3.8118	5.19	1	1	1	1	913086	231	25.8288	6.32861
Q8IR24	Stunted, isoform B OS=Drosophila melanogaster GN=sun PE=4 SV=1 - [Q8IR24_DROME]	3.753	26.32	2	1	1	1	1.33866e+07	57	6.33535	10.5942
Q9VJY6	60S ribosomal protein L24 OS=Drosophila melanogaster GN=RpL24 PE=1 SV=1 - [RL24_DROME]	3.74897	8.39	1	1	1	1	2.36068e+06	155	17.5089	11.063
Q7JYX2	CG2065 OS=Drosophila melanogaster GN=CG2065 PE=2 SV=1 - [Q7JYX2_DROME]	3.72205	4.33	3	1	1	1	2.97032e+06	300	33.3573	9.24658
Q0KIB3	CG2051 OS=Drosophila melanogaster GN=CG2051 PE=4 SV=1 - [Q0KIB3_DROME]	3.6302	3.21	1	1	1	1		405	47.9163	6.72705
Q9VXP3	GH05406p OS=Drosophila melanogaster GN=mRpS30 PE=2 SV=1 - [Q9VXP3_DROME]	3.61441	2.51	1	1	1	1	1.00784e+06	557	65.0669	8.47021
Q9VE04	39S ribosomal protein L55, mitochondrial OS=Drosophila melanogaster GN=mRpL55 PE=1 SV=1 - [RM55_DROME]	3.61247	15.89	1	1	1	1	704889	107	12.5599	10.1841
Q9V3Y4	LD43650p OS=Drosophila melanogaster GN=Mtch PE=2 SV=1 - [Q9V3Y4_DROME]	3.59809	5.06	1	1	1	1	621788	316	34.9893	9.05615
Q95SI7	CG6028 OS=Drosophila melanogaster GN=CG6028 PE=2 SV=1 - [Q95SI7_DROME]	3.59024	4.78	1	1	1	1	634713	293	32.2729	6.56592
B7YZX9	CG31688, isoform B OS=Drosophila melanogaster GN=CG31688 PE=4 SV=1 - [B7YZX9_DROME]	3.55418	8.29	3	1	1	1	972952	193	20.6073	7.23975
Q7KLG8	LD28935p OS=Drosophila melanogaster GN=Sep5 PE=2 SV=1 - [Q7KLG8_DROME]	3.5515	3.55	1	1	1	1	836116	422	48.4426	7.56201
Q9VEA1	Eukaryotic initiation factor 1A, isoform A OS=Drosophila melanogaster GN=eIF-1A PE=2 SV=1 - [Q9VEA1_DROME]	3.50234	7.43	1	1	1	1	9.0842e+06	148	17.0856	5.22412
Q8IP37	HL02152p OS=Drosophila melanogaster GN=l(2)35Di PE=2 SV=1 - [Q8IP37_DROME]	3.4851	9.42	2	1	1	1	1.55456e+06	138	16.0273	9.86182
Q9VZZ5	CG16986, isoform A OS=Drosophila melanogaster GN=CG16986-RA PE=2 SV=1 - [Q9VZZ5_DROME]	3.46543	9.79	1	1	1	1	776069	143	15.7543	8.52881
Q9VZF6	CG14997, isoform A OS=Drosophila melanogaster GN=CG14997 PE=2 SV=1 - [Q9VZF6_DROME]	3.42434	3.72	1	1	1	1	532037	457	51.1291	9.14404
P48603	F-actin-capping protein subunit beta OS=Drosophila melanogaster GN=cpb PE=2 SV=1 - [CAPZB_DROME]	3.41535	7.25	1	1	1	1	4.75118e+06	276	31.3435	5.43994
Q8IPF5	A kinase anchor protein 200, isoform B OS=Drosophila melanogaster GN=Akap200 PE=4 SV=1 - [Q8IPF5_DROME]	3.4128	4.3	3	1	1	1	664753	372	38.1456	4.53857
P48611	6-pyruvoyl tetrahydrobiopterin synthase OS=Drosophila melanogaster GN=pr PE=1 SV=1 - [PTPS_DROME]	3.41063	8.33	1	1	1	1	1.33468e+06	168	19.3248	7.21045
Q9VTU2	Lethal (3) neo18, isoform A OS=Drosophila melanogaster GN=l(3)neo18 PE=2 SV=1 - [Q9VTU2_DROME]	3.40331	6.45	1	1	1	1	6.66757e+06	186	22.0162	8.51416
Q9VYW4	CG1703 OS=Drosophila melanogaster GN=CG1703 PE=2 SV=1 - [Q9VYW4_DROME]	3.3999	1.55	1	1	1	1	2.34903e+06	901	101.481	5.8208
Q9VHE4	CG8132 OS=Drosophila melanogaster GN=CG8132 PE=2 SV=1 - [Q9VHE4_DROME]	3.38828	5.3	1	1	1	1	988291	283	31.8502	7.15186
E1JIL4	Chromatin assembly factor 1 subunit, isoform B OS=Drosophila melanogaster GN=Caf1 PE=2 SV=1 - [E1JIL4_DROME]	3.36761	3.03	2	1	1	1	4.80931e+06	429	48.5335	4.89404
Q494K2	CG13350 OS=Drosophila melanogaster GN=Ctf4 PE=2 SV=1 - [Q494K2_DROME]	3.35775	1.45	1	1	1	1	646076	895	96.5862	5.33838
Q9VLT5	Protein purity of essence OS=Drosophila melanogaster GN=poe PE=1 SV=1 - [POE_DROME]	3.35711	0.23	1	1	1	1	342874	5322	590.325	6.37939
Q9VF86	CG6218 OS=Drosophila melanogaster GN=CG6218 PE=2 SV=1 - [Q9VF86_DROME]	3.35665	3.74	1	1	1	1	2.53137e+06	348	37.8285	5.43994
P23128-2	Isoform B of Putative ATP-dependent RNA helicase me31b OS=Drosophila melanogaster GN=me31B - [DDX6_DROME]	3.31751	2.8	2	1	1	1	1.82539e+06	428	48.6124	7.97217
Q9VVA7	Tumor suppressor protein 101 OS=Drosophila melanogaster GN=TSG101 PE=2 SV=2 - [Q9VVA7_DROME]	3.31349	3.19	1	1	1	1	1.99346e+06	408	45.1619	6.3667
Q05344	FACT complex subunit Ssrp1 OS=Drosophila melanogaster GN=Ssrp PE=1 SV=2 - [SSRP1_DROME]	3.28774	2.21	1	1	1	1	2.08067e+06	723	81.4823	5.63037
M9PG32	TBP-associated factor 6, isoform B OS=Drosophila melanogaster GN=Taf6 PE=4 SV=1 - [M9PG32_DROME]	3.28672	2.81	2	1	1	1	651098	605	65.5259	8.93896
Q9W420	Transcription elongation factor SPT6 OS=Drosophila melanogaster GN=Spt6 PE=1 SV=1 - [SPT6H_DROME]	3.27608	0.82	1	1	1	1	1.11992e+06	1831	208.469	5.31299
Q8SYP9	Mitochondrial ribosomal protein S5, isoform A OS=Drosophila melanogaster GN=mRpS5 PE=2 SV=1 - [Q8SYP9_DROME]	3.25269	2.95	1	1	1	1	686169	407	45.9562	10.1987
P23625	G protein alpha q subunit OS=Drosophila melanogaster GN=Galphaq PE=2 SV=2 - [GNAQ_DROME]	3.23868	3.68	3	1	1	1	610230	353	41.2686	5.31299
Q9VTY2	CG10638, isoform A OS=Drosophila melanogaster GN=CG10638 PE=4 SV=1 - [Q9VTY2_DROME]	3.23374	3.79	1	1	1	1	389599	317	35.7735	6.11279
Q9W2N0	F-actin-capping protein subunit alpha OS=Drosophila melanogaster GN=cpa PE=2 SV=1 - [CAPZA_DROME]	3.218	4.55	1	1	1	1	6.27075e+06	286	32.7393	5.93506
Q9VWE8	Actin-related protein 10 OS=Drosophila melanogaster GN=Arp10 PE=2 SV=1 - [Q9VWE8_DROME]	3.19683	3.44	1	1	1	1	711922	378	42.2208	5.30029
Q9VQG4	Congested-like trachea protein OS=Drosophila melanogaster GN=colt PE=2 SV=1 - [COLT_DROME]	3.19231	4.25	1	1	1	1	1.83412e+06	306	32.931	9.51025
Q9W141	Putative ATP synthase subunit f, mitochondrial OS=Drosophila melanogaster GN=CG4692 PE=1 SV=1 - [ATPK_DROME]	3.18086	10.28	2	1	1	1	25431060	107	12.4754	10.0962
O18388	Importin subunit beta OS=Drosophila melanogaster GN=Fs(2)Ket PE=2 SV=2 - [IMB_DROME]	3.15351	1.47	1	1	1	1	1.58256e+06	884	98.6316	5.03369
Q8INK2	CG6783, isoform A OS=Drosophila melanogaster GN=fabp PE=4 SV=1 - [Q8INK2_DROME]	3.13644	11.11	3	1	1	1	1.09522e+06	117	12.8096	6.53662
Q7JZ62	CG10465 OS=Drosophila melanogaster GN=CG10465 PE=2 SV=1 - [Q7JZ62_DROME]	3.10789	4.32	1	1	1	1	746592	301	34.0272	6.43018
Q9VL89	Methionine aminopeptidase 2 OS=Drosophila melanogaster GN=und PE=2 SV=1 - [Q9VL89_DROME]	3.10719	2.23	1	1	1	1	3.9729e+06	448	49.7729	6.68311
Q9VV62	Doublesex cognate 73A OS=Drosophila melanogaster GN=dsx-c73A PE=2 SV=2 - [Q9VV62_DROME]	3.10662	1.29	1	1	1	1	346349	852	91.6745	5.51611
Q9W0H6	CG9149 OS=Drosophila melanogaster GN=CG9149 PE=3 SV=2 - [Q9W0H6_DROME]	3.09424	3.32	1	1	1	1	1.96779e+06	392	41.1365	7.04932
Q9VGW6	DNA replication licensing factor Mcm5 OS=Drosophila melanogaster GN=Mcm5 PE=1 SV=1 - [MCM5_DROME]	3.07565	2.05	1	1	1	1	758477	733	82.206	7.84033
O77410	Eukaryotic translation initiation factor 3 subunit E OS=Drosophila melanogaster GN=eIF3-S6 PE=2 SV=1 - [EIF3E_DROME]	3.07335	2.3	1	1	1	1	7.72458e+06	435	51.1291	6.78564
Q9W551	CG14817 OS=Drosophila melanogaster GN=CG14817-RA PE=4 SV=1 - [Q9W551_DROME]	3.07041	13.21	1	1	1	1	1.81327e+06	106	12.8209	10.0522
Q9I7W2	CG12106 OS=Drosophila melanogaster GN=CG12106 PE=2 SV=1 - [Q9I7W2_DROME]	3.06945	5.69	1	1	1	1	254415	211	23.0679	5.78271
Q9V4C8-5	Isoform F of Host cell factor OS=Drosophila melanogaster GN=Hcf - [HCF_DROME]	3.06574	1.04	3	1	1	1	861011	1448	154.236	7.60596
Q9VSL9	CG6638 OS=Drosophila melanogaster GN=CG6638 PE=2 SV=1 - [Q9VSL9_DROME]	3.06423	2.62	1	1	1	1	1.40541e+06	420	46.1664	8.17725
O97102	LD07775p OS=Drosophila melanogaster GN=smt3 PE=1 SV=1 - [O97102_DROME]	3.06293	13.33	1	1	1	1	2.75016e+06	90	10.118	5.45264
P16914-2	Isoform B of Protein elav OS=Drosophila melanogaster GN=elav - [ELAV_DROME]	3.05483	2.51	2	1	1	1	587801	479	50.2798	9.14404
P54353	Putative peptidyl-prolyl cis-trans isomerase dodo OS=Drosophila melanogaster GN=dod PE=2 SV=3 - [DOD_DROME]	3.03644	7.83	1	1	1	1	1.85043e+06	166	18.3651	7.44482
A1ZAX1	Eukaryotic translation initiation factor 3 subunit C OS=Drosophila melanogaster GN=eIF3-S8 PE=1 SV=1 - [EIF3C_DROME]	3.02015	1.32	1	1	1	1	10291154	910	105.588	6.06201
Q9VTB0	CG8003, isoform A OS=Drosophila melanogaster GN=CG8003 PE=2 SV=1 - [Q9VTB0_DROME]	3.01304	2.95	1	1	1	1	812364	407	45.739	7.62061
Q9W3Y3	CG3226 OS=Drosophila melanogaster GN=CG3226 PE=2 SV=1 - [Q9W3Y3_DROME]	2.98173	6.09	1	1	1	1	383902	230	25.7673	6.96143
Q7K2L7	CG17765 OS=Drosophila melanogaster GN=CG17765 PE=1 SV=1 - [Q7K2L7_DROME]	2.97791	7.04	1	1	1	1	1.14506e+06	199	22.4767	4.85596
Q9VIM5	Actin-related protein 2/3 complex subunit 2 OS=Drosophila melanogaster GN=Arpc2 PE=2 SV=2 - [ARPC2_DROME]	2.95043	4.32	1	1	1	1	616570	301	35.0822	7.91357
Q9VUR0	Probable Ufm1-specific protease 2 OS=Drosophila melanogaster GN=UFSP2 PE=2 SV=1 - [UFSP2_DROME]	2.9142	1.81	1	1	1	1	1.25925e+06	607	68.2067	6.75635
Q9V3E3	GM06185p OS=Drosophila melanogaster GN=mRpL50 PE=2 SV=1 - [Q9V3E3_DROME]	2.89396	7.41	1	1	1	1	9.90278e+06	189	20.914	9.48096
Q9VL69	CG5885 OS=Drosophila melanogaster GN=BEST:CK01296 PE=2 SV=1 - [Q9VL69_DROME]	2.88946	5.79	1	1	1	1	5.15999e+06	190	21.6223	9.56885
A1Z8X3	Anastral spindle 3 OS=Drosophila melanogaster GN=ana3 PE=4 SV=1 - [A1Z8X3_DROME]	2.88774	0.96	1	1	1	1		1977	225.409	7.86963
Q7KSZ0	Alhambra OS=Drosophila melanogaster GN=Alh PE=2 SV=1 - [Q7KSZ0_DROME]	2.88611	2.95	2	1	1	1	1.93228e+06	1323	132.804	8.66064
P32748	Dihydroorotate dehydrogenase (quinone), mitochondrial OS=Drosophila melanogaster GN=Dhod PE=2 SV=2 - [PYRD_DROME]	2.86545	3.21	1	1	1	1	839148	405	44.3144	9.24658
M9PH35	Cathepsin B1, isoform B OS=Drosophila melanogaster GN=CtsB1 PE=3 SV=1 - [M9PH35_DROME]	2.84241	3.33	2	1	1	1	2.0867e+06	330	36.2434	6.31592
Q24583	V-type proton ATPase subunit F 1 OS=Drosophila melanogaster GN=Vha14-1 PE=1 SV=1 - [VATF1_DROME]	2.83769	9.68	1	1	1	1	3.14413e+06	124	13.8412	6.37939
Q9VAJ2	Bub3 OS=Drosophila melanogaster GN=Bub3 PE=2 SV=1 - [Q9VAJ2_DROME]	2.83372	6.13	1	1	1	1	810225	326	37.3916	6.53662
A1Z8U9	Ribosomal protein S11, isoform B OS=Drosophila melanogaster GN=RpS11 PE=3 SV=1 - [A1Z8U9_DROME]	2.81353	11.69	2	1	1	1	4.59521e+06	154	18.0909	11.1216
Q9VU35	CG11267 OS=Drosophila melanogaster GN=CG11267 PE=3 SV=1 - [Q9VU35_DROME]	2.81311	12.62	1	1	1	1	1.07557e+06	103	11.0092	9.08545
Q7KW39-2	Isoform A of Probable methylmalonate-semialdehyde dehydrogenase [acylating], mitochondrial OS=Drosophila melanogaster GN=CG17896 - [MMSA_DROME]	2.79908	3.91	2	1	1	1	1.46738e+06	511	54.9982	8.35303
O96299	LD47736p OS=Drosophila melanogaster GN=Sodh-2 PE=2 SV=1 - [O96299_DROME]	2.79752	3.33	2	1	1	1	1.02446e+06	360	38.637	6.82959
Q7K3M5	CG11107 OS=Drosophila melanogaster GN=CG11107 PE=2 SV=1 - [Q7K3M5_DROME]	2.79624	2.19	1	1	1	1	1.24007e+06	729	82.599	7.06396
Q961V3	CG2246, isoform D OS=Drosophila melanogaster GN=CG2246 PE=2 SV=1 - [Q961V3_DROME]	2.7887	3.81	4	1	1	1	534296	367	40.5089	7.51807
O44226	Elongin B OS=Drosophila melanogaster GN=EloB PE=1 SV=1 - [O44226_DROME]	2.78736	10.17	1	1	1	1	3.78754e+06	118	13.2495	4.50049
O76861	CG2685 OS=Drosophila melanogaster GN=CG2685-RA PE=2 SV=1 - [O76861_DROME]	2.78492	2.54	1	1	1	1		552	60.9309	7.51807
Q8MQQ3	LP05923p OS=Drosophila melanogaster GN=pyd PE=2 SV=1 - [Q8MQQ3_DROME]	2.77248	1.13	8	1	1	1	822494	1149	125.499	8.79248
Q9I7K5	Transmembrane emp24 domain-containing protein eca OS=Drosophila melanogaster GN=eca PE=2 SV=2 - [TMEDE_DROME]	2.76732	5.09	2	1	1	1	2184918	216	25.1427	7.04932
Q7KS07	Nicastrin, isoform B OS=Drosophila melanogaster GN=nct PE=4 SV=1 - [Q7KS07_DROME]	2.76472	1.8	2	1	1	1	1.567e+06	665	74.5547	5.94775
A1Z909	CG8545 OS=Drosophila melanogaster GN=CG8545-RA PE=2 SV=1 - [A1Z909_DROME]	2.76393	1.68	1	1	1	1	1.21984e+06	891	99.7804	5.50342
Q9Y103	Septin-interacting protein 1 OS=Drosophila melanogaster GN=sip1 PE=1 SV=1 - [TFP11_DROME]	2.74796	2.38	1	1	1	1	2.16437e+07	839	94.7682	6.18896
Q8MSV1	Protein yippee-like OS=Drosophila melanogaster GN=Yippee PE=3 SV=1 - [Q8MSV1_DROME]	2.74037	10.91	2	1	1	1	2.31902e+06	110	12.6724	9.74463
P12426	Adenine phosphoribosyltransferase OS=Drosophila melanogaster GN=Aprt PE=2 SV=3 - [APT_DROME]	2.73798	6.04	1	1	1	1	1.58488e+06	182	19.6777	5.69385
Q95TP0	CG31961, isoform A OS=Drosophila melanogaster GN=CG31961 PE=2 SV=1 - [Q95TP0_DROME]	2.72825	3.38	1	1	1	1	607892	355	40.4965	7.32764
Q9W478	CG3097 OS=Drosophila melanogaster GN=CG3097 PE=2 SV=2 - [Q9W478_DROME]	2.69659	2.47	1	1	1	1	3.27134e+06	445	50.4979	9.37842
P41093	60S ribosomal protein L18a OS=Drosophila melanogaster GN=RpL18A PE=1 SV=1 - [RL18A_DROME]	2.67799	7.34	1	1	1	1	1.74831e+07	177	21.0164	10.6235
Q9VZI3	Unc-112-related protein OS=Drosophila melanogaster GN=Fit1 PE=1 SV=1 - [UN112_DROME]	2.67637	1.98	1	1	1	1	530061	708	80.4455	7.72314
Q9VC10	CG31120, isoform B OS=Drosophila melanogaster GN=PIG-S PE=2 SV=2 - [Q9VC10_DROME]	2.6754	2.43	1	1	1	1	1.2227e+06	536	60.4028	7.69385
M9PDQ2	Tousled-like kinase, isoform L OS=Drosophila melanogaster GN=tlk PE=4 SV=1 - [M9PDQ2_DROME]	2.67514	1.68	8	1	1	1	5.45373e+06	1011	109.885	9.0708
Q9NHD5	Probable N-acetyltransferase san OS=Drosophila melanogaster GN=san PE=1 SV=1 - [SAN_DROME]	2.67173	4.89	1	1	1	1	2.53316e+06	184	20.9807	8.77783
Q7JQH9	LD31742p OS=Drosophila melanogaster GN=whd PE=2 SV=1 - [Q7JQH9_DROME]	2.66653	1.67	2	1	1	1	2.5221e+06	780	89.3561	8.45557
Q9I7T6	CG10862 OS=Drosophila melanogaster GN=CG10862-RA PE=2 SV=1 - [Q9I7T6_DROME]	2.65349	3.39	1	1	1	1	1.30301e+06	354	39.03	10.0229
P27864	Recombination repair protein 1 OS=Drosophila melanogaster GN=Rrp1 PE=1 SV=2 - [RRP1_DROME]	2.64438	1.77	2	1	1	1	783005	679	74.5887	8.98291
P56538	Eukaryotic translation initiation factor 6 OS=Drosophila melanogaster GN=eIF6 PE=2 SV=3 - [IF6_DROME]	2.63264	4.9	1	1	1	1	1.24133e+06	245	26.4775	4.729
Q8INE8	Arginine methyltransferase 3, isoform B OS=Drosophila melanogaster GN=Art3 PE=2 SV=1 - [Q8INE8_DROME]	2.62679	2.74	2	1	1	1	761540	474	54.169	5.08447
Q9W2D9	Eukaryotic translation initiation factor 3 subunit K OS=Drosophila melanogaster GN=CG10306 PE=2 SV=1 - [EIF3K_DROME]	2.6205	4.95	1	1	1	1	1.1627e+07	222	25.6491	6.43018
Q9V7N5-2	Isoform A of V-type proton ATPase subunit C OS=Drosophila melanogaster GN=Vha44 - [VATC_DROME]	2.61957	3.35	3	1	1	1	2.18119e+06	388	44.5011	7.79639
Q9VMV6	SelT-like protein OS=Drosophila melanogaster GN=CG3887 PE=2 SV=1 - [SELT_DROME]	2.6063	6.06	1	1	1	1	2.9378e+06	198	22.3083	5.93506
Q9VLI9	RH40237p OS=Drosophila melanogaster GN=Trs23 PE=2 SV=1 - [Q9VLI9_DROME]	2.60187	6.39	1	1	1	1	641591	219	24.6959	5.43994
Q9VWH4-2	Isoform A of Probable isocitrate dehydrogenase [NAD] subunit alpha, mitochondrial OS=Drosophila melanogaster GN=l(1)G0156 - [IDH3A_DROME]	2.58928	3.39	2	1	1	1	3.28914e+06	354	38.5598	7.35693
Q9VDE2	CG5793 OS=Drosophila melanogaster GN=CG5793 PE=4 SV=2 - [Q9VDE2_DROME]	2.57929	7.02	1	1	1	1	440927	228	24.5877	6.53662
Q23983	Soluble NSF attachment protein OS=Drosophila melanogaster GN=Snap PE=1 SV=1 - [SNAP_DROME]	2.55828	4.11	1	1	1	1	693717	292	32.979	5.45264
Q9VUQ1	CG7945, isoform B OS=Drosophila melanogaster GN=CG7945 PE=2 SV=2 - [Q9VUQ1_DROME]	2.55818	4.44	2	1	1	1	432732	248	28.3609	5.23682
Q9VD64	Dead end OS=Drosophila melanogaster GN=dnd PE=2 SV=2 - [Q9VD64_DROME]	2.54792	6.15	2	1	1	1	644439	179	20.0534	8.23584
Q95U54	GH06271p OS=Drosophila melanogaster GN=Mms19 PE=2 SV=1 - [Q95U54_DROME]	2.54777	1.15	1	1	1	1	615133	959	106.981	5.90967
Q9VXP4	Platelet-activating factor acetylhydrolase IB subunit beta homolog OS=Drosophila melanogaster GN=Paf-AHalpha PE=1 SV=1 - [PA1B2_DROME]	2.54386	7.11	1	1	1	1	328616	225	25.445	5.80811
Q9VEN1-2	Isoform 2 of Filamin-A OS=Drosophila melanogaster GN=cher - [FLNA_DROME]	2.53162	1.19	5	1	1	1		838	90.3713	6.53662
Q9VMH2	Actin-related protein 2/3 complex, subunit 4 OS=Drosophila melanogaster GN=Arpc4 PE=1 SV=1 - [Q9VMH2_DROME]	2.51325	6.55	1	1	1	1	8.31094e+06	168	19.5652	8.45557
A1YK02	Nup75 OS=Drosophila melanogaster GN=Nup75 PE=4 SV=1 - [A1YK02_DROME]	2.50602	2.1	1	1	1	1	414736	668	76.8231	6.04932
Q9VCV7	CG4907 OS=Drosophila melanogaster GN=CG4907 PE=4 SV=1 - [Q9VCV7_DROME]	2.48531	1.41	1	1	1	1	1.80807e+06	919	104.267	7.73779
Q7JVZ8	CG5224 OS=Drosophila melanogaster GN=GstE11 PE=2 SV=1 - [Q7JVZ8_DROME]	2.48482	5.33	1	1	1	1	1.24738e+06	225	25.078	5.87158
Q9VF03	Brahma associated protein 155 kDa OS=Drosophila melanogaster GN=mor PE=2 SV=3 - [Q9VF03_DROME]	2.48329	1.08	1	1	1	1	1.18104e+06	1209	131.28	5.73193
P35128	Ubiquitin-conjugating enzyme E2 N OS=Drosophila melanogaster GN=ben PE=2 SV=1 - [UBE2N_DROME]	2.47928	9.93	1	1	1	1	197643	151	17.225	5.60498
Q7KT29	CG10481 OS=Drosophila melanogaster GN=CG10481 PE=4 SV=1 - [Q7KT29_DROME]	2.46498	3.56	1	1	1	1		646	76.1791	8.77783
Q9W3C1	Polycomb protein l(1)G0020 OS=Drosophila melanogaster GN=l(1)G0020 PE=1 SV=2 - [U202_DROME]	2.44336	1.29	1	1	1	1	2.24668e+06	1008	112.803	8.52881
Q9VXD4	CG15865 OS=Drosophila melanogaster GN=CG15865 PE=4 SV=1 - [Q9VXD4_DROME]	2.44041	1.66	1	1	1	1		1084	123.679	8.17725
M9PFL9	CENP-meta, isoform F OS=Drosophila melanogaster GN=cmet PE=3 SV=1 - [M9PFL9_DROME]	2.42697	0.89	4	1	1	1	1.31679e+07	2132	244.677	5.21143
Q9VC18	CG11089 OS=Drosophila melanogaster GN=CG11089 PE=2 SV=1 - [Q9VC18_DROME]	2.42398	2.37	1	1	1	1	2.28819e+06	590	63.2837	7.86963
Q9VGW1	Cadherin-86C OS=Drosophila melanogaster GN=Cad86C PE=2 SV=3 - [CAD86_DROME]	2.42262	0.67	1	1	1	1	2.20895e+06	1943	220.272	6.99072
Q9VIN9	LP10852p OS=Drosophila melanogaster GN=mRpS18B PE=2 SV=1 - [Q9VIN9_DROME]	2.42085	5.39	1	1	1	1	2.76487e+06	204	23.1645	8.67529
Q8I0A0	CG5854, isoform B OS=Drosophila melanogaster GN=CG5854 PE=2 SV=1 - [Q8I0A0_DROME]	2.41875	3.95	2	1	1	1		329	37.2088	5.73193
Q9VE85	CG7671 OS=Drosophila melanogaster GN=Nup43 PE=4 SV=1 - [Q9VE85_DROME]	2.41875	3.63	1	1	1	1	509389	358	40.1224	5.22412
Q9VQK0-2	Isoform B of UPF0518 protein CG3558 OS=Drosophila melanogaster GN=CG3558 - [U518_DROME]	2.41469	2.04	4	1	1	1		1028	112.401	6.12549
Q9VJH2	CG31739, isoform A OS=Drosophila melanogaster GN=mdy PE=2 SV=3 - [Q9VJH2_DROME]	2.39921	1.11	1	1	1	1	337715	1082	121.444	5.8208
Q9VF83	CG31301 OS=Drosophila melanogaster GN=CG12258 PE=2 SV=2 - [Q9VF83_DROME]	2.39615	2.73	1	1	1	1	2.64015e+06	439	50.0212	8.82178
O76928	Carmine, isoform A OS=Drosophila melanogaster GN=cm PE=2 SV=1 - [O76928_DROME]	2.39016	2.65	1	1	1	1	973079	415	46.7661	8.07471
Q9VHT2	FI07663p OS=Drosophila melanogaster GN=tex PE=2 SV=1 - [Q9VHT2_DROME]	2.38409	4.06	1	1	1	1	1.0362e+06	320	36.3829	6.46826
A8JRC2	CG5028, isoform E OS=Drosophila melanogaster GN=CG5028 PE=3 SV=1 - [A8JRC2_DROME]	2.38311	4.11	4	1	1	1	2.69371e+06	341	37.6589	6.11279
Q9VHW4	FI21225p1 OS=Drosophila melanogaster GN=unc-45 PE=2 SV=1 - [Q9VHW4_DROME]	2.38273	0.84	1	1	1	1		947	104.981	5.78271
P54359	Septin-2 OS=Drosophila melanogaster GN=Sep2 PE=2 SV=2 - [SEPT2_DROME]	2.37508	2.86	1	1	1	1	1.02914e+06	419	48.4438	7.60596
Q9XYU0	DNA replication licensing factor Mcm7 OS=Drosophila melanogaster GN=Mcm7 PE=1 SV=1 - [MCM7_DROME]	2.36249	1.81	1	1	1	1	888655	720	81.2324	6.99072
Q9VXQ0	Mitochondrial ribosomal protein L3 OS=Drosophila melanogaster GN=mRpL3 PE=4 SV=2 - [Q9VXQ0_DROME]	2.35209	4.42	1	1	1	1		362	40.5273	10.0669
Q9VHM4	CG9793 OS=Drosophila melanogaster GN=ranshi PE=4 SV=1 - [Q9VHM4_DROME]	2.35058	3.47	1	1	1	1	592613	346	40.7038	7.00537
A1ZAK1	CG5859 OS=Drosophila melanogaster GN=IntS8 PE=2 SV=1 - [A1ZAK1_DROME]	2.35055	0.99	1	1	1	1		1007	113.407	6.49365
Q9VRV7	Splicing factor 3B subunit 6-like protein OS=Drosophila melanogaster GN=CG13298 PE=1 SV=1 - [SF3B6_DROME]	2.34741	9.92	1	1	1	1	1.17939e+06	121	14.1853	9.31982
Q9VBJ6	Protein tweety homolog OS=Drosophila melanogaster GN=CG14540 PE=3 SV=1 - [Q9VBJ6_DROME]	2.33665	2.45	1	1	1	1	2.06147e+07	613	68.5034	8.99756
Q9VRQ2	Mad2 OS=Drosophila melanogaster GN=mad2 PE=2 SV=1 - [Q9VRQ2_DROME]	2.33095	5.31	1	1	1	1	574857	207	23.3898	5.92236
Q9VBP9-2	Isoform B of Nuclear protein localization protein 4 homolog OS=Drosophila melanogaster GN=Npl4 - [NPL4_DROME]	2.32743	2.08	2	1	1	1	1.05224e+06	624	69.9277	6.72705
Q9VU02	Probable small nuclear ribonucleoprotein Sm D1 OS=Drosophila melanogaster GN=SmD1 PE=1 SV=1 - [SMD1_DROME]	2.32654	8.87	1	1	1	1	2.7747e+06	124	13.7876	11.6489
Q9VWI6	Kekkon5, isoform A OS=Drosophila melanogaster GN=kek5 PE=2 SV=2 - [Q9VWI6_DROME]	2.32624	1.83	1	1	1	1		931	102.423	8.19189
P91929	NADH dehydrogenase [ubiquinone] 1 alpha subcomplex subunit 10, mitochondrial OS=Drosophila melanogaster GN=ND42 PE=2 SV=2 - [NDUAA_DROME]	2.31715	2.95	1	1	1	1		407	46.8676	6.80029
Q8IPJ7	Cytochrome P450 reductase, isoform B OS=Drosophila melanogaster GN=Cpr PE=4 SV=1 - [Q8IPJ7_DROME]	2.31163	2	2	1	1	1	2.60208e+06	550	62.8274	8.23584
Q9W1X4	Nuclear pore complex protein Nup214 OS=Drosophila melanogaster GN=Nup214 PE=1 SV=2 - [NU214_DROME]	2.30461	0.76	1	1	1	1	708174	1711	175.067	8.74854
Q8I0G5-3	Isoform C of Coatomer subunit gamma OS=Drosophila melanogaster GN=gammaCop - [COPG_DROME]	2.30317	1.37	3	1	1	1	870679	878	97.144	5.30029
Q9VLU7	CG7227, isoform A OS=Drosophila melanogaster GN=CG7227 PE=2 SV=1 - [Q9VLU7_DROME]	2.30151	3.09	1	1	1	1	1.29918e+07	518	59.726	7.7085
Q9W4D4	CG4198 OS=Drosophila melanogaster GN=CG4198 PE=2 SV=2 - [Q9W4D4_DROME]	2.30056	6.92	1	1	1	1		477	53.3761	7.29834
A1Z813	Sec24 OS=Drosophila melanogaster GN=Sec24AB PE=4 SV=1 - [A1Z813_DROME]	2.30024	0.93	1	1	1	1	971820	1184	129.298	7.62061
Q9V9P9	CG11629 OS=Drosophila melanogaster GN=CG11629-RA PE=2 SV=1 - [Q9V9P9_DROME]	2.30006	2.38	1	1	1	2	3.51095e+06	463	52.257	10.0083
Q9V521	Phenoloxidase subunit A3 OS=Drosophila melanogaster GN=proPo-A3 PE=1 SV=1 - [PRPA3_DROME]	2.29892	1.17	1	1	1	1	3.9224e+06	684	79.2346	6.97607
Q9V9X4	Methylthioribose-1-phosphate isomerase OS=Drosophila melanogaster GN=CG11334 PE=2 SV=1 - [MTNA_DROME]	2.29825	3.02	1	1	1	1	2.0758e+06	364	39.0836	7.00537
O97477	Inositol-3-phosphate synthase OS=Drosophila melanogaster GN=Inos PE=1 SV=1 - [INO1_DROME]	2.29823	2.83	1	1	1	1	6.55528e+06	565	62.2108	6.22705
Q9VQX6	CG3702, isoform A OS=Drosophila melanogaster GN=CG3702 PE=2 SV=2 - [Q9VQX6_DROME]	2.29486	1.25	1	1	1	1	1.29705e+06	641	73.5533	7.13721
Q9VKK1	Enhancer of mRNA-decapping protein 4 homolog OS=Drosophila melanogaster GN=Ge-1 PE=1 SV=2 - [EDC4_DROME]	2.28911	1.77	1	1	1	1		1354	149.157	5.89697
O97454	L(1)10Bb OS=Drosophila melanogaster GN=l(1)10Bb PE=2 SV=1 - [O97454_DROME]	2.28408	6.94	1	1	1	1	173080	144	16.9985	8.51416
Q9VBX5	CG31108 OS=Drosophila melanogaster GN=CG10057 PE=2 SV=1 - [Q9VBX5_DROME]	2.28269	1.96	1	1	1	1		917	104.326	8.33838
Q9U915	Adenylate kinase OS=Drosophila melanogaster GN=Adk2 PE=1 SV=1 - [KAD2_DROME]	2.27859	4.17	1	1	1	1	971150	240	26.5259	7.88428
Q8I725	CG1236 OS=Drosophila melanogaster GN=CG1236 PE=3 SV=2 - [Q8I725_DROME]	2.27644	2.31	1	1	1	1	3.87037e+06	347	38.3503	8.26514
Q9VXE8	Courtless OS=Drosophila melanogaster GN=crl PE=2 SV=1 - [Q9VXE8_DROME]	2.27428	7.78	1	1	1	1		167	18.4442	4.79248
M9NDM3	Rhea, isoform C OS=Drosophila melanogaster GN=rhea PE=4 SV=1 - [M9NDM3_DROME]	2.27242	0.65	4	1	1	1	3.22688e+06	2169	235.137	5.99854
Q9VXF9	AT13091p OS=Drosophila melanogaster GN=rngo PE=2 SV=1 - [Q9VXF9_DROME]	2.27189	6.11	1	1	1	1		458	50.5053	5.16064
Q9W517	Protein wings apart-like OS=Drosophila melanogaster GN=wapl PE=1 SV=1 - [WAPL_DROME]	2.27108	1.03	1	1	1	1		1741	185.043	6.53662
Q9VC06	CG11771 OS=Drosophila melanogaster GN=CG11771 PE=2 SV=1 - [Q9VC06_DROME]	2.26948	1.64	1	1	1	1	420873	730	81.3474	7.07861
Q9V4W1	Nucleoporin GLE1 OS=Drosophila melanogaster GN=GLE1 PE=2 SV=1 - [GLE1_DROME]	2.26871	1.62	1	1	1	1	5.7758e+06	677	77.3109	6.80029
Q8SY41	Breast carcinoma-amplified sequence 3 homolog OS=Drosophila melanogaster GN=rudhira PE=1 SV=1 - [BCAS3_DROME]	2.26257	1.25	2	1	1	1	541063	1122	117.464	5.92236
E1JIJ8	Acetylcholine esterase, isoform B OS=Drosophila melanogaster GN=Ace PE=4 SV=1 - [E1JIJ8_DROME]	2.26197	1.69	2	1	1	1	1.17267e+06	649	71.8385	6.1001
Q9VDC3	AP-2sigma OS=Drosophila melanogaster GN=AP-2sigma PE=2 SV=1 - [Q9VDC3_DROME]	2.26119	4.93	1	1	1	1	9.63416e+06	142	16.9526	6.17627
Q7KSD3	Frayed, isoform A OS=Drosophila melanogaster GN=fray PE=2 SV=1 - [Q7KSD3_DROME]	2.25887	2.17	1	1	1	1	501086	552	60.2633	5.99854
P49762	Serine/threonine-protein kinase Doa OS=Drosophila melanogaster GN=Doa PE=1 SV=2 - [DOA_DROME]	2.25653	1.56	2	1	1	1		832	95.6627	8.67529
Q9Y134	L.2.35Df OS=Drosophila melanogaster GN=l(2)35Df PE=2 SV=1 - [Q9Y134_DROME]	2.25414	1.04	1	1	1	1	850235	1055	118.85	6.771
Q9XZ57	Eb1, isoform E OS=Drosophila melanogaster GN=Eb1 PE=2 SV=1 - [Q9XZ57_DROME]	2.25299	4.48	3	1	1	1	9.07685e+07	290	32.4679	5.33838
Q9VCN1	DNA polymerase OS=Drosophila melanogaster GN=DNApol-epsilon PE=3 SV=3 - [Q9VCN1_DROME]	2.25163	1.16	1	1	1	1	2.78105e+07	2236	256.538	6.46826
Q06943	High mobility group protein Z OS=Drosophila melanogaster GN=HmgZ PE=1 SV=1 - [HMGZ_DROME]	2.24859	12.61	1	1	1	1	341779	111	12.6485	9.29053
Q7KML2	Probable peroxisomal acyl-coenzyme A oxidase 1 OS=Drosophila melanogaster GN=CG5009 PE=1 SV=1 - [ACOX1_DROME]	2.24617	2.09	1	1	1	1		669	74.2398	6.90283
P18930	NADH-ubiquinone oxidoreductase chain 3 OS=Drosophila melanogaster GN=mt:ND3 PE=3 SV=1 - [NU3M_DROME]	2.24574	9.4	1	1	1	1	2.53222e+06	117	13.5545	8.17725
Q9VRJ9	Ubiquitin thioesterase OTU1 OS=Drosophila melanogaster GN=CG4603 PE=2 SV=1 - [OTU1_DROME]	2.2437	4.03	2	1	1	1		347	37.799	4.81787
Q9VQT8	CG16712 OS=Drosophila melanogaster GN=CG16712 PE=4 SV=1 - [Q9VQT8_DROME]	2.24362	12.2	1	1	1	1	3.0721e+06	82	8.74523	5.92236
Q9XZ34	CG30085 OS=Drosophila melanogaster GN=Rif1 PE=2 SV=1 - [Q9XZ34_DROME]	2.23727	1.84	1	1	1	1		1416	156.721	6.65381
Q9VAI2	Kuzbanian-like OS=Drosophila melanogaster GN=Kul PE=4 SV=1 - [Q9VAI2_DROME]	2.23726	0.91	1	1	1	1		1537	168.692	9.1001
Q9VD66	Female-specific independent of transformer OS=Drosophila melanogaster GN=fit PE=2 SV=1 - [Q9VD66_DROME]	2.23466	9.09	1	1	1	1	650762	121	13.8689	7.57666
Q9VH48	Probable histone-arginine methyltransferase CARMER OS=Drosophila melanogaster GN=Art4 PE=1 SV=1 - [CARM1_DROME]	2.23447	1.89	1	1	1	1	4.49224e+06	530	59.6895	6.12549
Q5BI50	Cullin-4, isoform A OS=Drosophila melanogaster GN=Cul-4 PE=2 SV=1 - [Q5BI50_DROME]	2.23195	1.34	1	1	1	1	3.63022e+08	821	94.3478	8.66064
Q9VIP8	Protein valois OS=Drosophila melanogaster GN=vls PE=1 SV=1 - [VLS_DROME]	2.22464	3.54	1	1	1	1	1.67646e+06	367	40.5831	6.7417
Q24048-2	Isoform 2.1 of Sodium/potassium-transporting ATPase subunit beta-2 OS=Drosophila melanogaster GN=nrv2 - [ATPB2_DROME]	2.22374	4.04	2	1	1	1	1.34302e+06	322	36.9436	7.92822
Q8IPT1	CG32441, isoform D OS=Drosophila melanogaster GN=CG32441 PE=4 SV=2 - [Q8IPT1_DROME]	2.22368	7.48	2	1	1	1		214	23.7131	5.26221
Q9VMU0	CG8680 OS=Drosophila melanogaster GN=CG8680 PE=2 SV=1 - [Q9VMU0_DROME]	2.21579	11.11	1	1	1	1	2.78896e+06	126	14.3482	8.57275
E1JJ90	CG7352, isoform C OS=Drosophila melanogaster GN=CG7352 PE=4 SV=1 - [E1JJ90_DROME]	2.21444	5.08	2	1	1	1	1.19569e+06	394	47.7806	8.93896
Q9VIK0	CG9319, isoform A OS=Drosophila melanogaster GN=CG9319-RA PE=2 SV=1 - [Q9VIK0_DROME]	2.21413	4.29	1	1	1	1	4.89263e+07	373	41.5864	6.55127
Q7K569	GH10595p OS=Drosophila melanogaster GN=Gpo-1 PE=2 SV=1 - [Q7K569_DROME]	2.21393	1.66	1	1	1	1	1.11019e+06	724	80.3712	7.6499
Q9VGK7	Putative elongator complex protein 1 OS=Drosophila melanogaster GN=Elp1 PE=1 SV=2 - [ELP1_DROME]	2.21322	0.88	1	1	1	1	3.92377e+06	1252	142.724	6.43018
Q9VJ77	CG15160 OS=Drosophila melanogaster GN=CG15160-RA PE=2 SV=2 - [Q9VJ77_DROME]	2.21199	3.41	1	1	1	1		822	90.9095	5.63037
Q9I7H9	Prolyl 3-hydroxylase sudestada1 OS=Drosophila melanogaster GN=sud1 PE=2 SV=1 - [OGFD1_DROME]	2.20814	3.36	1	1	1	1	379954	536	61.1544	4.95752
Q9V6Y3	Probable 28S ribosomal protein S16, mitochondrial OS=Drosophila melanogaster GN=mRpS16 PE=2 SV=1 - [RT16_DROME]	2.20678	6.2	1	1	1	1	1.23412e+07	129	14.5096	9.979
E1JH95	CG4966, isoform C OS=Drosophila melanogaster GN=HPS4 PE=4 SV=1 - [E1JH95_DROME]	2.20675	1.33	3	1	1	1	2.29941e+06	828	93.0668	6.80029
Q9VCQ8	CG6738 OS=Drosophila melanogaster GN=CG6738-RA PE=2 SV=2 - [Q9VCQ8_DROME]	2.2061	2.74	2	1	1	1	472304	401	45.0234	5.51611
Q9W0B8	Alpha-coatomer protein, isoform A OS=Drosophila melanogaster GN=alphaCOP PE=2 SV=1 - [Q9W0B8_DROME]	2.20607	0.81	1	1	1	1	1.95002e+06	1234	139.241	7.6499
P05812	Heat shock protein 67B1 OS=Drosophila melanogaster GN=Hsp67Ba PE=3 SV=1 - [HSP6A_DROME]	2.20531	8.4	1	1	1	1		238	26.5747	8.77783
P29845	Heat shock 70 kDa protein cognate 5 OS=Drosophila melanogaster GN=Hsc70-5 PE=1 SV=2 - [HSP7E_DROME]	2.20483	1.46	1	1	1	1	2.25179e+06	686	74.0202	6.354
M9PDW9	Deadlock, isoform B OS=Drosophila melanogaster GN=del PE=4 SV=1 - [M9PDW9_DROME]	2.20469	2.35	2	1	1	1		978	110.407	9.14404
A8JNV5	Rad9, isoform B OS=Drosophila melanogaster GN=Rad9 PE=4 SV=2 - [A8JNV5_DROME]	2.20457	2.41	2	1	1	1	1.06621e+07	456	51.1773	4.89404
Q9VEH0	Aluminum tubes, isoform A OS=Drosophila melanogaster GN=alt PE=4 SV=1 - [Q9VEH0_DROME]	2.20363	1.31	2	1	1	1	1.97764e+06	842	95.0376	7.09326
Q9V726-2	Isoform B of Cleavage and polyadenylation specificity factor subunit 1 OS=Drosophila melanogaster GN=Cpsf160 - [CPSF1_DROME]	2.20019	0.7	2	1	1	1	2.18143e+06	1420	160.617	6.17627
Q7K0A0	Mitochondrial ribosomal protein L42 OS=Drosophila melanogaster GN=mRpL42 PE=2 SV=1 - [Q7K0A0_DROME]	2.19582	8.06	1	1	1	1	5.49303e+06	124	13.9213	10.4185
P42282	Protein tramtrack, alpha isoform OS=Drosophila melanogaster GN=ttk PE=1 SV=3 - [TTKA_DROME]	2.19337	2.71	1	1	1	1	1.73206e+07	813	88.3284	6.25244
Q9VLJ5	AT07979p2 OS=Drosophila melanogaster GN=lmgB PE=2 SV=3 - [Q9VLJ5_DROME]	2.1893	8.22	1	1	1	1		365	37.6744	9.90576
Q9VK81	CG5418 OS=Drosophila melanogaster GN=CG5418 PE=4 SV=1 - [Q9VK81_DROME]	2.18902	5.92	1	1	1	1		355	40.0715	5.8208
Q9VQD8	Actin-related protein 2/3 complex subunit 5 OS=Drosophila melanogaster GN=Arpc5 PE=1 SV=1 - [Q9VQD8_DROME]	2.18582	5.96	1	1	1	1	3.44399e+06	151	16.6584	5.18604
Q9V8R9-6	Isoform 6 of Protein 4.1 homolog OS=Drosophila melanogaster GN=cora - [41_DROME]	2.18538	1.57	5	1	1	1	4.46487e+06	699	77.7117	8.42627
Q9Y105	Probable glutamine--tRNA ligase OS=Drosophila melanogaster GN=Aats-gln PE=1 SV=1 - [SYQ_DROME]	2.18223	1.29	1	1	1	1	1.04523e+06	778	87.4531	7.21045
Q9VUQ9	CG6498, isoform A OS=Drosophila melanogaster GN=CG6498 PE=4 SV=1 - [Q9VUQ9_DROME]	2.18014	1.54	1	1	1	1		2139	225.369	8.44092
Q7JVY0	Coronin OS=Drosophila melanogaster GN=coro PE=2 SV=1 - [Q7JVY0_DROME]	2.17865	2.65	1	1	1	1	376408	528	57.2326	6.37939
Q8IRH4	Protein tyrosine phosphatase 61F, isoform D OS=Drosophila melanogaster GN=Ptp61F PE=4 SV=1 - [Q8IRH4_DROME]	2.17732	2.09	4	1	1	1	2.44348e+06	431	48.4862	5.19873
Q9VPN0	CG3625, isoform B OS=Drosophila melanogaster GN=CG3625 PE=2 SV=1 - [Q9VPN0_DROME]	2.17696	5.24	1	1	1	1	638866	248	28.4893	9.51025
Q9VZU7	Ubiquitin carboxyl-terminal hydrolase OS=Drosophila melanogaster GN=CG12082 PE=2 SV=1 - [Q9VZU7_DROME]	2.17552	1.21	1	1	1	1	802501	827	92.0333	5.49072
A8DY44	Nipped-A, isoform D OS=Drosophila melanogaster GN=Nipped-A PE=4 SV=1 - [A8DY44_DROME]	2.17348	0.37	2	1	1	1	9.99458e+06	3790	435.083	7.75244
Q9VYS8	Anoctamin OS=Drosophila melanogaster GN=CG10353-RC PE=2 SV=3 - [Q9VYS8_DROME]	2.16917	2.34	2	1	1	1	4.95438e+06	984	112.343	7.45947
O18335	Drab11 OS=Drosophila melanogaster GN=Rab11 PE=2 SV=1 - [O18335_DROME]	2.1678	5.14	1	1	1	1	2.98218e+06	214	24.2305	5.73193
M9PCQ6	CG6509, isoform C OS=Drosophila melanogaster GN=CG6509 PE=4 SV=1 - [M9PCQ6_DROME]	2.16309	1.07	3	1	1	1		1497	162.422	8.17725
O96607	Homer OS=Drosophila melanogaster GN=homer PE=2 SV=1 - [O96607_DROME]	2.16072	2.54	5	1	1	1	2.61267e+06	394	42.6784	7.48877
O97067	Probable peptidyl-tRNA hydrolase 2 OS=Drosophila melanogaster GN=CG1307 PE=2 SV=2 - [PTH2_DROME]	2.15909	8.06	1	1	1	1		186	19.8603	8.89502
M9MRD9	CG8552, isoform B OS=Drosophila melanogaster GN=CG8552 PE=4 SV=1 - [M9MRD9_DROME]	2.1582	1.51	2	1	1	1	1.84343e+06	663	74.9427	5.97314
Q8IN51	CG31205 OS=Drosophila melanogaster GN=CG31205-RB PE=2 SV=2 - [Q8IN51_DROME]	2.15617	5.84	1	1	1	1	1.56811e+06	274	30.2924	6.52197
Q8STG9	DSec61alpha OS=Drosophila melanogaster GN=Sec61alpha PE=2 SV=1 - [Q8STG9_DROME]	2.15023	2.31	1	1	1	1	6.21869e+06	476	52.1505	8.23584
Q9VM16	CG15818 OS=Drosophila melanogaster GN=CG15818 PE=2 SV=1 - [Q9VM16_DROME]	2.14998	3.53	1	1	1	1	1.75142e+06	283	32.2782	6.30322
Q9VGP6	Prefoldin subunit 3 OS=Drosophila melanogaster GN=mgr PE=1 SV=3 - [PFD3_DROME]	2.14692	4.64	1	1	1	1	2.87314e+06	194	22.3003	5.10986
Q7KUT2-2	Isoform A of Lon protease homolog, mitochondrial OS=Drosophila melanogaster GN=Lon - [LONM_DROME]	2.14574	1.09	2	1	1	1		1006	112.823	7.29834
Q9VR31	CG2976, isoform A OS=Drosophila melanogaster GN=CG2976 PE=2 SV=1 - [Q9VR31_DROME]	2.14075	3.02	1	1	1	1	1.93015e+06	331	38.8833	5.17334
Q8MSX2	Mediator of RNA polymerase II transcription subunit 6 OS=Drosophila melanogaster GN=MED6 PE=1 SV=1 - [MED6_DROME]	2.13945	4.42	1	1	1	1	2.4144e+06	249	28.3561	8.01611
A1Z9J6	Mitochondrial ribosomal protein L53 OS=Drosophila melanogaster GN=mRpL53 PE=2 SV=1 - [A1Z9J6_DROME]	2.13626	8.39	1	1	1	1		155	16.8502	10.0083
Q961C9	Transport and Golgi organization protein 11 OS=Drosophila melanogaster GN=Tango11 PE=1 SV=1 - [TNG11_DROME]	2.13391	3.97	1	1	1	1	1.003e+06	277	31.5217	6.18896
Q9VYR0	Protein LSM12 homolog A OS=Drosophila melanogaster GN=CG15735 PE=2 SV=2 - [LS12A_DROME]	2.13154	5.99	1	1	1	1	683082	217	23.7307	5.68115
M9NFI6	CG15446, isoform C OS=Drosophila melanogaster GN=CG15446 PE=4 SV=1 - [M9NFI6_DROME]	2.13149	3.81	2	1	1	1	1.39321e+07	315	35.5134	9.59814
Q11002-2	Isoform A of Calpain-A OS=Drosophila melanogaster GN=CalpA - [CANA_DROME]	2.12187	1.77	3	1	1	1	533791	565	64.7652	4.81787
Q7KN90	Cysteine--tRNA ligase, cytoplasmic OS=Drosophila melanogaster GN=Aats-cys PE=1 SV=1 - [SYCC_DROME]	2.11918	1.08	1	1	1	1	1.54185e+06	741	84.2058	6.30322
P08111-2	Isoform p78 of Lethal(2) giant larvae protein OS=Drosophila melanogaster GN=l(2)gl - [L2GL_DROME]	2.11858	1.98	5	1	1	1	1.03019e+06	708	78.0626	6.07471
Q500Y7	CG14482 OS=Drosophila melanogaster GN=CG14482 PE=4 SV=1 - [Q500Y7_DROME]	2.11407	17.54	1	1	1	1	1.61513e+06	57	6.27128	9.46631
O02194-3	Isoform 3 of Presenilin homolog OS=Drosophila melanogaster GN=Psn - [PSN_DROME]	2.11304	3.54	1	1	1	1	2.20927e+06	508	55.6897	6.68311
Q9VCF4	AP-1sigma OS=Drosophila melanogaster GN=AP-1sigma PE=2 SV=2 - [Q9VCF4_DROME]	2.10645	5.73	1	1	1	1	6.90771e+06	157	18.5616	6.55127
Q9VF89	39S ribosomal protein L9, mitochondrial OS=Drosophila melanogaster GN=mRpL9 PE=2 SV=1 - [RM09_DROME]	2.10185	4.03	1	1	1	1	866861	248	28.7862	9.26123
M9PDD4	CG40045, isoform C OS=Drosophila melanogaster GN=CG40045 PE=3 SV=1 - [M9PDD4_DROME]	2.09813	5.3	3	1	1	1	3.68742e+06	132	15.4016	6.53662
Q9VRV9	CG8219 OS=Drosophila melanogaster GN=CG8219 PE=4 SV=2 - [Q9VRV9_DROME]	2.09718	1.41	1	1	1	1		853	96.3669	5.12256
Q9VQ68	CG42296 OS=Drosophila melanogaster GN=lectin-22C PE=4 SV=2 - [Q9VQ68_DROME]	2.09641	1.31	1	1	1	1		994	109.412	6.3667
Q9VHN6	39S ribosomal protein L19, mitochondrial OS=Drosophila melanogaster GN=mRpL19 PE=2 SV=1 - [RM19_DROME]	2.09372	2.94	1	1	1	1	797095	306	36.17	8.82178
Q9VUV9	Putative U5 small nuclear ribonucleoprotein 200 kDa helicase OS=Drosophila melanogaster GN=l(3)72Ab PE=2 SV=4 - [U520_DROME]	2.09277	0.47	1	1	1	1	759036	2142	244.356	6.03662
E1JGN7	Bancal, isoform E OS=Drosophila melanogaster GN=bl PE=4 SV=1 - [E1JGN7_DROME]	2.08864	2.64	3	1	1	1	2.14673e+06	493	49.8425	8.35303
Q9V9K7	Serrate RNA effector molecule homolog OS=Drosophila melanogaster GN=Ars2 PE=1 SV=2 - [SRRT_DROME]	2.08803	1.17	1	1	1	1	1.38172e+06	943	107.156	5.5542
P42271	Tubulin gamma-2 chain OS=Drosophila melanogaster GN=gammaTub37C PE=2 SV=3 - [TBG2_DROME]	2.08778	2.41	1	1	1	1	1.55169e+06	457	51.2639	6.31592
A1ZB82	CG5174, isoform K OS=Drosophila melanogaster GN=CG5174 PE=4 SV=1 - [A1ZB82_DROME]	2.08411	9.09	8	1	1	1	1.32103e+07	99	10.9826	5.09717
Q9W542	LD07342p OS=Drosophila melanogaster GN=mip130 PE=1 SV=3 - [Q9W542_DROME]	2.07722	1.62	1	1	1	1	1.42838e+06	986	110.359	5.2749
Q9VM49	CG11266, isoform A OS=Drosophila melanogaster GN=CG11266 PE=2 SV=1 - [Q9VM49_DROME]	2.07659	1.85	1	1	1	1	657498	594	66.4415	10.0083
Q8IPG9	Basigin, isoform A OS=Drosophila melanogaster GN=Bsg PE=2 SV=1 - [Q8IPG9_DROME]	2.07473	3.77	3	1	1	1	4.35376e+06	265	29.207	5.18604
Q9VDI1	LD46328p OS=Drosophila melanogaster GN=Synd PE=1 SV=2 - [Q9VDI1_DROME]	2.06982	2.02	1	1	1	1	1.64418e+06	494	55.8754	5.63037
Q4V495	CG34402, isoform D OS=Drosophila melanogaster GN=CG31218 PE=2 SV=1 - [Q4V495_DROME]	2.06705	2.67	2	1	1	1	1.01569e+07	486	54.4788	6.99072
O46037	Vinculin OS=Drosophila melanogaster GN=Vinc PE=1 SV=1 - [VINC_DROME]	2.06513	1.14	1	1	1	1	997264	961	106.236	6.69775
Q7KJA9	O-glycosyltransferase OS=Drosophila melanogaster GN=sxc PE=2 SV=1 - [Q7KJA9_DROME]	2.06223	0.94	1	1	1	1	1.57217e+06	1059	118.575	7.15186
Q9VJ64	CG10383 OS=Drosophila melanogaster GN=CG10383-RA PE=2 SV=1 - [Q9VJ64_DROME]	2.06055	1.79	1	1	1	1	392981	784	89.7343	8.01611
M9PDV6	CG43955, isoform B OS=Drosophila melanogaster GN=Fife PE=4 SV=1 - [M9PDV6_DROME]	2.05786	1.65	2	1	1	1	1.5803e+06	969	104.702	8.19189
Q9VEQ2	CG3678 OS=Drosophila melanogaster GN=CG17556-RA PE=2 SV=2 - [Q9VEQ2_DROME]	2.05539	3.9	1	1	1	1	2.20044e+06	282	32.7237	7.04932
Q7JWH5	MIP07211p OS=Drosophila melanogaster GN=Roc2 PE=4 SV=1 - [Q7JWH5_DROME]	2.05374	13.27	1	1	1	1	10556042	113	13.0919	5.85889
Q9VM19	Trehalose 6-phosphate phosphatase OS=Drosophila melanogaster GN=CG5171 PE=2 SV=1 - [Q9VM19_DROME]	2.05004	3.3	2	1	1	1	1.17504e+06	273	30.5978	6.55127
Q9VD23	Pyruvate kinase OS=Drosophila melanogaster GN=CG7069 PE=3 SV=2 - [Q9VD23_DROME]	2.04801	1.75	1	1	1	1		744	83.9432	8.6167
P28466	Protein Wnt-5 OS=Drosophila melanogaster GN=Wnt5 PE=1 SV=2 - [WNT5_DROME]	2.04398	1.2	1	1	1	1	832244	1004	112.388	8.79248
Q9VCW6	GH03051p OS=Drosophila melanogaster GN=Gclm PE=2 SV=1 - [Q9VCW6_DROME]	2.04194	2.81	1	1	1	1	1.66684e+06	285	31.4532	5.74463
Q8T0J5	CG7675, isoform A OS=Drosophila melanogaster GN=CG7675 PE=2 SV=1 - [Q8T0J5_DROME]	2.04035	4.53	2	1	1	1	2.53658e+06	287	31.4298	9.31982
P08120	Collagen alpha-1(IV) chain OS=Drosophila melanogaster GN=Cg25C PE=2 SV=3 - [CO4A1_DROME]	2.03909	0.79	1	1	1	1	4.30764e+06	1779	174.193	8.60205
Q9VMB9	Cytochrome c oxidase subunit Vb OS=Drosophila melanogaster GN=CoVb PE=2 SV=1 - [Q9VMB9_DROME]	2.03811	10.83	1	1	1	1	4.04239e+06	120	13.5697	8.68994
Q9VA34	CG15544 OS=Drosophila melanogaster GN=CG15544 PE=2 SV=4 - [Q9VA34_DROME]	2.03773	2	1	1	1	1		851	90.9534	7.53271
Q0E930	CG30116, isoform B OS=Drosophila melanogaster GN=CG30116 PE=4 SV=1 - [Q0E930_DROME]	2.03719	0.88	3	1	1	1	4.06014e+06	1698	190.455	6.68311
Q9VBT1	CG31098 OS=Drosophila melanogaster GN=CG31098 PE=4 SV=2 - [Q9VBT1_DROME]	2.03199	1.92	1	1	1	1	1.53915e+06	417	47.8906	5.64307
Q9W0T7	CG16940, isoform A OS=Drosophila melanogaster GN=CG16940 PE=2 SV=2 - [Q9W0T7_DROME]	2.02993	1.26	2	1	1	1		1032	116.767	8.17725
A1Z6S6	RE54322p OS=Drosophila melanogaster GN=vimar PE=2 SV=1 - [A1Z6S6_DROME]	2.02772	2.05	2	1	1	1	609234	634	70.2089	5.16064
O77430	EG:115C2.4 protein OS=Drosophila melanogaster GN=skpA PE=1 SV=1 - [O77430_DROME]	2.02314	6.79	1	1	1	1	2.13296e+06	162	18.5852	4.65283
Q9VBX1	Nuclear export mediator factor NEMF homolog OS=Drosophila melanogaster GN=Clbn PE=1 SV=2 - [NEMF_DROME]	2.01689	1.01	1	1	1	1	1.41919e+06	992	112.546	7.1665
Q9VJC6	Dynein heavy chain at 36C OS=Drosophila melanogaster GN=Dhc36C PE=4 SV=2 - [Q9VJC6_DROME]	2.01437	0.25	1	1	1	1	1.29303e+06	4024	460.863	5.93506
Q9VP05	Mediator of RNA polymerase II transcription subunit 1 OS=Drosophila melanogaster GN=MED1 PE=1 SV=2 - [MED1_DROME]	2.01257	1.36	1	1	1	1	1.90345e+07	1475	149.439	9.33447
Q8T060	CG12304, isoform B OS=Drosophila melanogaster GN=CG12304-RB PE=2 SV=3 - [Q8T060_DROME]	2.01053	3.32	2	1	1	1	1.94002e+06	301	33.2203	8.6167
Q9VAQ9	Strictosidine synthase-like 2 OS=Drosophila melanogaster GN=Ssl2 PE=4 SV=1 - [Q9VAQ9_DROME]	2.00829	2.92	1	1	1	1	2.16097e+08	411	45.9221	6.94678
Q0E914	Smooth, isoform G OS=Drosophila melanogaster GN=sm PE=4 SV=1 - [Q0E914_DROME]	2.00768	6.54	5	1	1	1		260	28.4635	8.80713
O96860	Dynein light chain 2, cytoplasmic OS=Drosophila melanogaster GN=Cdlc2 PE=3 SV=1 - [DYL2_DROME]	2.00742	12.36	2	1	1	1	4.48942e+06	89	10.3511	7.37158
Q9VM33	Elongation factor G, mitochondrial OS=Drosophila melanogaster GN=ico PE=2 SV=2 - [EFGM_DROME]	2.00707	1.07	1	1	1	1	977724	745	83.4566	6.72705
Q8I0L0	CG32240 OS=Drosophila melanogaster GN=CG32240 PE=2 SV=1 - [Q8I0L0_DROME]	2.00342	8.28	1	1	1	1	2.01146e+06	145	17.382	9.86182
Q9VB25	FI17842p1 OS=Drosophila melanogaster GN=Klp98A PE=2 SV=2 - [Q9VB25_DROME]	1.99942	0.79	1	1	1	1	731160	1265	141.473	6.13818
Q9W107	Probable tyrosine--tRNA ligase, mitochondrial OS=Drosophila melanogaster GN=CG16912 PE=2 SV=1 - [SYYM_DROME]	1.99812	2.8	1	1	1	1		464	52.5413	8.80713
M9PIA6	Mi-2, isoform D OS=Drosophila melanogaster GN=Mi-2 PE=4 SV=1 - [M9PIA6_DROME]	1.99812	0.61	3	1	1	1	1.33022e+06	1973	222.991	5.75732
P08646	Ras-like protein 1 OS=Drosophila melanogaster GN=Ras85D PE=1 SV=2 - [RAS1_DROME]	1.99516	4.76	1	1	1	1	1.02685e+06	189	21.5799	7.81104
R9PY71	CG34264, isoform D OS=Drosophila melanogaster GN=CG34264 PE=4 SV=1 - [R9PY71_DROME]	1.99416	7.89	2	1	1	1	979064	114	13.0528	10.1841
Q9VKE7	CG14933, isoform A OS=Drosophila melanogaster GN=CG42486-RA PE=4 SV=1 - [Q9VKE7_DROME]	1.99259	19.48	1	1	1	1	1.78289e+06	77	8.50725	8.48486
A8JQU3	Gasp, isoform B OS=Drosophila melanogaster GN=Gasp PE=4 SV=1 - [A8JQU3_DROME]	1.98935	4.68	2	1	1	1	940085	235	26.0768	4.75439
Q9VFE6	RRP15-like protein OS=Drosophila melanogaster GN=CG3817 PE=1 SV=1 - [RRP15_DROME]	1.98866	3.62	1	1	1	1	1.33845e+06	276	31.1875	5.22412
B7YZQ1	Sterile20-like kinase, isoform F OS=Drosophila melanogaster GN=slik PE=4 SV=1 - [B7YZQ1_DROME]	1.98537	0.8	2	1	1	1	3.51383e+06	1635	184.482	6.7417
Q9VEV7	CG17565 OS=Drosophila melanogaster GN=CG17565 PE=2 SV=1 - [Q9VEV7_DROME]	1.98442	2.39	1	1	1	1	1.27952e+06	419	46.6818	5.38916
A1ZBA9	Autophagy-specific gene 7, isoform B OS=Drosophila melanogaster GN=Atg7 PE=4 SV=1 - [A1ZBA9_DROME]	1.98418	2.94	2	1	1	1		510	56.8657	5.94775
Q9NGX9	Cytochrome P450 302a1, mitochondrial OS=Drosophila melanogaster GN=dib PE=2 SV=2 - [CP302_DROME]	1.98044	3.07	1	1	1	1	5.53227e+06	489	55.539	9.12939
Q4V6M5	CG32023 OS=Drosophila melanogaster GN=CG32023 PE=2 SV=1 - [Q4V6M5_DROME]	1.97862	12.5	1	1	1	1	1.29041e+07	160	17.4832	6.26514
Q9VXD3	CG13012, isoform B OS=Drosophila melanogaster GN=CG13012 PE=2 SV=2 - [Q9VXD3_DROME]	1.97443	11.63	1	1	1	1	2.22998e+06	129	13.9041	7.34229
A1ZAI3	Putative fatty acyl-CoA reductase CG8303 OS=Drosophila melanogaster GN=CG8303 PE=2 SV=2 - [FACR2_DROME]	1.97109	1.61	1	1	1	1	2.8428e+06	620	70.0929	8.39697
Q9VMG8	CG13991 OS=Drosophila melanogaster GN=CG13991 PE=4 SV=2 - [Q9VMG8_DROME]	1.97045	0.74	1	1	1	1	1.42026e+06	1767	206.752	8.88037
Q9VDJ9	Leucine-rich repeat kinase OS=Drosophila melanogaster GN=Lrrk PE=2 SV=3 - [Q9VDJ9_DROME]	1.96998	0.33	1	1	1	1	1.42749e+07	2445	271.348	7.06396
Q9V359	Vacuolar protein sorting-associated protein 28 homolog OS=Drosophila melanogaster GN=Vps28 PE=1 SV=1 - [VPS28_DROME]	1.96859	5.24	1	1	1	1		210	24.4963	4.95752
Q9VFN1	CG14357 OS=Drosophila melanogaster GN=CG14357 PE=4 SV=2 - [Q9VFN1_DROME]	1.96732	2.19	1	1	1	1	1.05705e+08	319	35.6454	8.19189
A1ZB14	Eag-like K[+] channel OS=Drosophila melanogaster GN=Elk PE=1 SV=1 - [A1ZB14_DROME]	1.96477	0.93	1	1	1	1	2.10869e+06	1284	141.289	7.21045
M9PJQ5	Wings up A, isoform K OS=Drosophila melanogaster GN=wupA PE=4 SV=1 - [M9PJQ5_DROME]	1.96475	5.98	3	1	1	1	3.03855e+06	184	21.6368	9.68604
Q6NP72	CG13220 OS=Drosophila melanogaster GN=CG13220 PE=2 SV=1 - [Q6NP72_DROME]	1.96431	7.19	1	1	1	1	1.14327e+06	153	16.3748	9.43701
M9PJM7	Garnet, isoform F OS=Drosophila melanogaster GN=g PE=4 SV=1 - [M9PJM7_DROME]	1.9643	1.76	2	1	1	1	722853	967	106.921	6.90283
Q961B8	CG8290, isoform B OS=Drosophila melanogaster GN=BEST:LD29214 PE=2 SV=1 - [Q961B8_DROME]	1.9629	1.51	2	1	1	1	1.60216e+07	1125	127.332	8.25049
Q2PE36	Adenosine deaminase acting on RNA, isoform C OS=Drosophila melanogaster GN=Adar PE=2 SV=1 - [Q2PE36_DROME]	1.96197	6.45	9	1	1	2	479846	186	20.7736	9.23193
Q9VS90	CG14838 OS=Drosophila melanogaster GN=CG14838 PE=4 SV=1 - [Q9VS90_DROME]	1.96196	0.8	1	1	1	1	4.15565e+06	1132	130.431	5.18604
Q9VEC8	CG7215, isoform A OS=Drosophila melanogaster GN=Prx5-RA PE=2 SV=1 - [Q9VEC8_DROME]	1.96184	6.92	1	1	1	1	2.54196e+06	130	14.7398	7.28369
M9MSI8	Tweek, isoform I OS=Drosophila melanogaster GN=tweek PE=4 SV=1 - [M9MSI8_DROME]	1.96161	0.26	4	1	1	1		5075	564.426	7.31299
P18488	Homeotic protein empty spiracles OS=Drosophila melanogaster GN=ems PE=2 SV=2 - [EMS_DROME]	1.95967	3.02	1	1	1	1	1.27778e+06	497	53.7498	7.57666
Q9VQS5	Intraflagellar transport protein 57 homolog OS=Drosophila melanogaster GN=Che-13 PE=2 SV=1 - [IFT57_DROME]	1.95964	2.47	1	1	1	1		405	47.1438	4.93213
Q9VQD1	CG3515 OS=Drosophila melanogaster GN=CG3515-RA PE=2 SV=2 - [Q9VQD1_DROME]	1.9577	4.05	1	1	1	1		395	44.7415	8.85107
Q0E8X7	CG30415, isoform A OS=Drosophila melanogaster GN=CG30415 PE=4 SV=1 - [Q0E8X7_DROME]	1.95763	8.54	1	1	1	1	1.04084e+07	82	9.53489	9.67139
Q9VDQ7	Phagocyte signaling-impaired protein OS=Drosophila melanogaster GN=psidin PE=2 SV=1 - [NAA25_DROME]	1.95575	0.95	1	1	1	1	798706	948	109.04	6.94678
Q9VVA6	Nuclear migration protein NudC OS=Drosophila melanogaster GN=nudC PE=2 SV=2 - [Q9VVA6_DROME]	1.95531	3.61	1	1	1	1	859776	332	37.7684	5.64307
M9PF04	CG32103, isoform D OS=Drosophila melanogaster GN=CG32103 PE=3 SV=1 - [M9PF04_DROME]	1.95503	2	1	1	1	1	1.25046e+07	350	38.9502	8.77783
Q9VY97	Mutagen-sensitive 101 OS=Drosophila melanogaster GN=mus101 PE=4 SV=1 - [Q9VY97_DROME]	1.95395	0.84	1	1	1	1		1425	158.34	6.50732
Q9VB95	TweedleC OS=Drosophila melanogaster GN=TwdlC PE=4 SV=1 - [Q9VB95_DROME]	1.95305	3.61	1	1	1	1	1.74588e+06	360	39.4592	6.22705
Q9VNH1	Probable RNA methyltransferase CG1239 OS=Drosophila melanogaster GN=CG1239 PE=2 SV=2 - [BN3D2_DROME]	1.94821	4.67	1	1	1	1	1.55401e+06	300	34.7023	9.5249
Q9VE52	Cleavage stimulation factor 64 kilodalton subunit OS=Drosophila melanogaster GN=CstF-64 PE=2 SV=2 - [Q9VE52_DROME]	1.94582	3.1	1	1	1	1		419	46.155	5.78271
Q9VCA9	Signal peptidase complex subunit 3 OS=Drosophila melanogaster GN=Spase22-23 PE=2 SV=1 - [SPCS3_DROME]	1.94548	5.03	1	1	1	1	6.91894e+06	179	20.2914	7.97217
M9PCC7	Piezo, isoform M OS=Drosophila melanogaster GN=Piezo PE=4 SV=1 - [M9PCC7_DROME]	1.93901	0.47	9	1	1	1		2533	288.14	8.27979
Q9W350	C11.1 OS=Drosophila melanogaster GN=c11.1 PE=2 SV=2 - [Q9W350_DROME]	1.93752	0.8	1	1	1	1		1742	192.968	6.3667
Q7K581	CG8963, isoform A OS=Drosophila melanogaster GN=CG8963 PE=2 SV=1 - [Q7K581_DROME]	1.93491	2.5	1	1	1	1	2.37642e+06	559	63.1903	6.22705
Q8SX76	LD24646p OS=Drosophila melanogaster GN=pch2 PE=2 SV=1 - [Q8SX76_DROME]	1.934	2.38	1	1	1	1	786341	421	46.5342	5.69385
Q9VNB9	RE17737p OS=Drosophila melanogaster GN=RpL35A PE=1 SV=1 - [Q9VNB9_DROME]	1.93359	5.73	1	1	1	1	5.03313e+06	157	17.6447	11.1216
Q9VM12	CG5958 OS=Drosophila melanogaster GN=CG5958-RA PE=2 SV=1 - [Q9VM12_DROME]	1.93284	4.08	1	1	1	1		294	33.9135	7.44482
Q9VXK9	CG9170, isoform A OS=Drosophila melanogaster GN=CG9170 PE=2 SV=1 - [Q9VXK9_DROME]	1.93247	1.04	1	1	1	1		1246	139.63	6.17627
M9PGX7	Succinyl-CoA:3-ketoacid-coenzyme A transferase OS=Drosophila melanogaster GN=CG1140 PE=3 SV=1 - [M9PGX7_DROME]	1.93198	4.67	3	1	1	1		450	47.9372	7.88428
Q9W1M9	Rrp4 OS=Drosophila melanogaster GN=Rrp4 PE=4 SV=1 - [Q9W1M9_DROME]	1.93147	4.03	1	1	1	1	1.0235e+06	298	33.6033	6.18896
Q7KW08	EG:63B12.5 protein OS=Drosophila melanogaster GN=Pex5 PE=4 SV=1 - [Q7KW08_DROME]	1.9313	1.79	2	1	1	1		559	63.0846	4.88135
Q9VSK9	CG6745 OS=Drosophila melanogaster GN=CG6745 PE=2 SV=1 - [Q9VSK9_DROME]	1.93071	1.77	1	1	1	1		734	82.7493	5.64307
Q9VK13	CG15479 OS=Drosophila melanogaster GN=CG15479 PE=2 SV=1 - [Q9VK13_DROME]	1.92984	5.83	1	1	1	1	9.74352e+06	206	24.0323	9.49561
Q9VTZ5	LD22449p OS=Drosophila melanogaster GN=Tsf2 PE=2 SV=1 - [Q9VTZ5_DROME]	1.92793	1.83	1	1	1	1		819	92.2657	6.45557
M9NDG6	CG34031 OS=Drosophila melanogaster GN=CG34031 PE=3 SV=1 - [M9NDG6_DROME]	1.92787	5.02	1	1	1	1	1.61921e+06	219	25.2403	10.0962
Q9VCX7	CG31156 OS=Drosophila melanogaster GN=CG31156 PE=2 SV=3 - [Q9VCX7_DROME]	1.92637	1.9	1	1	1	1	8.24731e+06	948	106.364	8.86572
Q24276	Hsp90 co-chaperone Cdc37 OS=Drosophila melanogaster GN=Cdc37 PE=1 SV=1 - [CDC37_DROME]	1.92616	2.83	1	1	1	1	912486	389	45.1213	5.05908
