# Supplementary material for: Mysterious inhibitory cell regulator investigated and found likely to be secretogranin II related
Source: PeerJ. 2017 Oct 13;5:e3833. doi: 10.7717/peerj.3833 (PMC5642266; doi:10.7717/peerj.3833)
Supplement: Supplemental Information 6 — Total hit 634. [file peerj-05-3833-s006.xlsx]

## Sheet: Sheet1
Accession	Description	Score	Coverage	# Proteins	# Unique Peptides	# Peptides	# PSMs	Area	# AAs	MW [kDa]	calc. pI
P02844	Vitellogenin-2 OS=Drosophila melanogaster GN=Yp2 PE=1 SV=2 - [VIT2_DROME]	562.682	64.48	1	25	26	171	3.41974e+08	442	49.63	7.95752
P11147	Heat shock 70 kDa protein cognate 4 OS=Drosophila melanogaster GN=Hsc70-4 PE=1 SV=3 - [HSP7D_DROME]	227.415	51.77	5	24	31	96	1.71786e+07	651	71.0874	5.51611
P02828	Heat shock protein 83 OS=Drosophila melanogaster GN=Hsp83 PE=1 SV=1 - [HSP83_DROME]	184.67	37.1	4	26	28	76	4.28604e+07	717	81.8142	5.021
P29844	Heat shock 70 kDa protein cognate 3 OS=Drosophila melanogaster GN=Hsc70-3 PE=2 SV=2 - [HSP7C_DROME]	175.677	33.54	1	16	20	61	1.3522e+07	656	72.2165	5.36377
Q7KN62	Transitional endoplasmic reticulum ATPase TER94 OS=Drosophila melanogaster GN=TER94 PE=1 SV=1 - [TERA_DROME]	151.105	27.72	4	16	16	43	5.98968e+06	801	88.8033	5.35107
P29413	Calreticulin OS=Drosophila melanogaster GN=Crc PE=1 SV=2 - [CALR_DROME]	141.942	43.35	1	17	17	47	1.0627e+07	406	46.7792	4.57666
Q9W0S7	LD20211p OS=Drosophila melanogaster GN=Tudor-SN PE=1 SV=1 - [Q9W0S7_DROME]	138.149	30.24	1	21	21	48	1.00545e+07	926	103.037	8.04541
Q94920	Voltage-dependent anion-selective channel OS=Drosophila melanogaster GN=porin PE=1 SV=3 - [VDAC_DROME]	134.988	61.7	1	15	15	49	5.44255e+07	282	30.5315	6.96143
P54399	Protein disulfide-isomerase OS=Drosophila melanogaster GN=Pdi PE=2 SV=1 - [PDI_DROME]	131.969	57.66	2	25	25	51	8.0428e+06	496	55.7464	4.81787
P92177-4	Isoform C of 14-3-3 protein epsilon OS=Drosophila melanogaster GN=14-3-3epsilon - [1433E_DROME]	124.522	59.38	4	14	16	52	2.25328e+07	256	29.1545	4.84326
P13060	Elongation factor 2 OS=Drosophila melanogaster GN=EF2 PE=1 SV=4 - [EF2_DROME]	123.412	29.27	2	21	21	44	2.65458e+07	844	94.3981	6.59521
P02572	Actin-42A OS=Drosophila melanogaster GN=Act42A PE=1 SV=3 - [ACT2_DROME]	121.226	50	2	4	13	39	3.35492e+07	376	41.7968	5.47803
P25007	Peptidyl-prolyl cis-trans isomerase OS=Drosophila melanogaster GN=Cyp1 PE=1 SV=2 - [PPIA_DROME]	109.75	34.36	2	8	8	40	1.18245e+07	227	24.6505	9.21729
P07764	Fructose-bisphosphate aldolase OS=Drosophila melanogaster GN=Ald PE=1 SV=5 - [ALF_DROME]	106.273	57.89	3	18	18	42	8.93039e+06	361	39.0233	7.40088
P08879	Nucleoside diphosphate kinase OS=Drosophila melanogaster GN=awd PE=1 SV=3 - [NDKA_DROME]	103.031	46.41	1	6	6	39	3.27596e+07	153	17.1589	8.11865
Q9VL78	FK506-binding protein 59 OS=Drosophila melanogaster GN=FKBP59 PE=1 SV=1 - [FKB59_DROME]	100.143	30.3	1	12	12	40	1.34039e+07	439	48.7646	5.41455
O18640	Guanine nucleotide-binding protein subunit beta-like protein OS=Drosophila melanogaster GN=Rack1 PE=1 SV=2 - [GBLP_DROME]	90.8226	55.03	3	16	16	34	2.01503e+07	318	35.5957	7.47412
P24156	Protein l(2)37Cc OS=Drosophila melanogaster GN=l(2)37Cc PE=2 SV=2 - [L2CC_DROME]	89.7331	68.48	1	14	14	28	9.97685e+06	276	30.3651	5.73193
Q9V496	Apolipophorins OS=Drosophila melanogaster GN=Rfabg PE=1 SV=2 - [APLP_DROME]	89.3048	7.82	1	21	21	33	2.98634e+06	3351	372.447	7.97217
P45594	Cofilin/actin-depolymerizing factor homolog OS=Drosophila melanogaster GN=tsr PE=2 SV=1 - [CADF_DROME]	86.0005	64.86	1	10	10	38	3.15525e+07	148	17.1425	7.1665
P40304	Proteasome subunit beta type-1 OS=Drosophila melanogaster GN=Prosbeta6 PE=2 SV=2 - [PSB1_DROME]	84.869	51.49	1	8	8	26	9.83688e+06	235	25.826	6.53662
Q7KUB0	Isocitrate dehydrogenase [NADP] OS=Drosophila melanogaster GN=Idh PE=3 SV=1 - [Q7KUB0_DROME]	81.5823	38.46	5	13	13	29	8.45679e+06	416	46.6308	6.7417
Q9V3P0	Peroxiredoxin 1 OS=Drosophila melanogaster GN=Jafrac1 PE=1 SV=1 - [PRDX1_DROME]	80.393	55.67	1	10	10	29	2.35616e+07	194	21.724	5.70654
P05661-15	Isoform 18 of Myosin heavy chain, muscle OS=Drosophila melanogaster GN=Mhc - [MYSA_DROME]	78.3266	11.93	32	18	18	25	1.93654e+06	1936	221.385	6.23975
P00334	Alcohol dehydrogenase OS=Drosophila melanogaster GN=Adh PE=1 SV=2 - [ADH_DROME]	73.8445	73.83	1	12	12	24	1.6151e+07	256	27.7439	7.95752
Q02748	Eukaryotic initiation factor 4A OS=Drosophila melanogaster GN=eIF-4a PE=1 SV=3 - [IF4A_DROME]	70.7047	36.72	2	16	16	32	1.07981e+07	403	45.8494	5.65576
E1JGP0	Actin 57B, isoform C OS=Drosophila melanogaster GN=Act57B PE=2 SV=1 - [E1JGP0_DROME]	70.3416	40.83	5	2	11	27	3.00261e+07	360	40.2322	5.8335
P06607	Vitellogenin-3 OS=Drosophila melanogaster GN=Yp3 PE=1 SV=1 - [VIT3_DROME]	65.8151	37.14	1	10	10	21	7.60655e+06	420	46.0726	8.49951
Q9VNA5	Proteasome subunit beta type-4 OS=Drosophila melanogaster GN=Prosbeta7 PE=2 SV=1 - [PSB4_DROME]	64.1734	29.1	1	7	7	19	1.06781e+07	268	29.9667	6.58057
Q9W418	GH17761p OS=Drosophila melanogaster GN=Ubi-p5E PE=2 SV=3 - [Q9W418_DROME]	61.5997	76.03	5	7	7	26	3.61252e+07	534	59.9934	7.62061
Q9V5C6	Proteasome subunit alpha type-3 OS=Drosophila melanogaster GN=Prosalpha7 PE=1 SV=1 - [PSA3_DROME]	61.0369	45.06	1	10	10	20	2.06071e+07	253	27.658	5.69385
Q9W1G7	LD21576p OS=Drosophila melanogaster GN=Nap1 PE=2 SV=1 - [Q9W1G7_DROME]	60.0468	27.57	8	9	9	24	7.08267e+06	370	42.7408	4.79248
Q9VEB1	CG7998 OS=Drosophila melanogaster GN=Mdh2 PE=2 SV=1 - [Q9VEB1_DROME]	59.2427	44.35	1	12	12	21	7.3316e+06	336	35.296	9.11475
P54622	Single-stranded DNA-binding protein, mitochondrial OS=Drosophila melanogaster GN=mtSSB PE=1 SV=2 - [SSBP_DROME]	59.1832	44.52	1	5	5	16	8.20917e+06	146	16.3575	9.84717
P15007-2	Isoform A of Enolase OS=Drosophila melanogaster GN=Eno - [ENO_DROME]	59.0508	35.33	2	10	10	19	9.71705e+06	433	46.633	6.55127
P02283	Histone H2B OS=Drosophila melanogaster GN=His2B PE=1 SV=2 - [H2B_DROME]	57.988	42.28	1	6	6	21	3.59178e+07	123	13.6875	10.3452
P22769	Proteasome subunit alpha type-7-1 OS=Drosophila melanogaster GN=Prosalpha4 PE=1 SV=2 - [PSA71_DROME]	57.5426	27.31	2	5	5	18	3.80199e+06	249	27.9554	8.11865
O62619-2	Isoform B of Pyruvate kinase OS=Drosophila melanogaster GN=PyK - [KPYK_DROME]	56.9885	27.34	2	11	11	23	4.96035e+06	512	55.0237	7.85498
Q9VWV6	Transferrin 1 OS=Drosophila melanogaster GN=Tsf1 PE=4 SV=1 - [Q9VWV6_DROME]	55.9189	22.46	1	12	12	22	1.99911e+06	641	71.7665	7.06396
B7YZQ7	Nucleosome remodeling factor-38kD, isoform B OS=Drosophila melanogaster GN=Nurf-38 PE=4 SV=1 - [B7YZQ7_DROME]	55.5007	44.14	2	9	9	17	5.87719e+06	290	32.6255	5.68115
P40796	La protein homolog OS=Drosophila melanogaster GN=La PE=1 SV=2 - [LA_DROME]	54.5864	30.77	1	10	10	19	3.29817e+06	390	44.8573	7.57666
P12881	Proteasome subunit alpha type-1 OS=Drosophila melanogaster GN=Prosalpha6 PE=1 SV=1 - [PSA1_DROME]	54.4314	53.05	1	11	11	21	7.97606e+06	279	31.0397	6.55127
Q8T0L3	GH24511p OS=Drosophila melanogaster GN=Uba1 PE=2 SV=1 - [Q8T0L3_DROME]	53.7991	9.4	1	8	8	16	1.0966e+06	1191	130.676	5.2876
O02649	60 kDa heat shock protein, mitochondrial OS=Drosophila melanogaster GN=Hsp60 PE=1 SV=3 - [CH60_DROME]	53.5988	28.97	2	14	14	18	3.82817e+06	573	60.7709	5.49072
Q9NJH0	Elongation factor 1-gamma OS=Drosophila melanogaster GN=Ef1gamma PE=2 SV=2 - [EF1G_DROME]	53.3637	30.63	1	13	13	24	1.35347e+07	431	48.9368	7.04932
P29310	14-3-3 protein zeta OS=Drosophila melanogaster GN=14-3-3zeta PE=1 SV=1 - [1433Z_DROME]	53.263	44.35	3	7	9	20	1.91086e+07	248	28.2101	4.88135
P84040	Histone H4 OS=Drosophila melanogaster GN=His4 PE=1 SV=2 - [H4_DROME]	52.9802	52.43	1	8	8	22	2.32854e+07	103	11.3744	11.356
Q9VUC1	Hsc70Cb, isoform A OS=Drosophila melanogaster GN=Hsc70Cb PE=2 SV=1 - [Q9VUC1_DROME]	52.858	19.65	2	12	12	18	7.54938e+06	804	88.4457	5.42725
Q05825	ATP synthase subunit beta, mitochondrial OS=Drosophila melanogaster GN=ATPsyn-beta PE=2 SV=3 - [ATPB_DROME]	52.7514	31.49	3	11	11	17	3.89964e+06	505	54.0744	5.2749
Q9VVL7	Dihydrolipoyl dehydrogenase OS=Drosophila melanogaster GN=CG7430 PE=2 SV=1 - [Q9VVL7_DROME]	50.6516	24.01	1	8	8	16	1.69904e+06	504	53.0515	6.87354
Q9VGM2	CG6783, isoform B OS=Drosophila melanogaster GN=fabp PE=2 SV=1 - [Q9VGM2_DROME]	50.6044	49.23	3	6	6	18	3.01862e+07	130	14.4935	5.65576
C4NYP8	Hsc70-interacting protein 1 OS=Drosophila melanogaster GN=HIP PE=1 SV=2 - [F10A1_DROME]	48.9771	18.3	1	7	7	19	1.16745e+07	377	41.0114	5.35107
P61851	Superoxide dismutase [Cu-Zn] OS=Drosophila melanogaster GN=Sod PE=1 SV=2 - [SODC_DROME]	48.4112	54.9	2	6	6	17	1.13758e+07	153	15.6887	6.11279
Q3YMU0	ERp60 (Fragment) OS=Drosophila melanogaster GN=ERp60 PE=2 SV=1 - [Q3YMU0_DROME]	47.8794	21.88	1	9	9	20	5.59252e+06	489	55.3361	5.87158
P13395	Spectrin alpha chain OS=Drosophila melanogaster GN=alpha-Spec PE=1 SV=2 - [SPTCA_DROME]	47.1886	7	4	14	14	19	1.36708e+06	2415	278.132	5.19873
Q95083	Proteasome subunit alpha type-5 OS=Drosophila melanogaster GN=Prosalpha5 PE=2 SV=2 - [PSA5_DROME]	44.1302	34.02	1	8	8	18	9.84577e+06	244	26.8664	4.98291
P02843	Vitellogenin-1 OS=Drosophila melanogaster GN=Yp1 PE=1 SV=1 - [VIT1_DROME]	42.7369	25.28	1	7	8	21	1.02947e+08	439	48.6815	7.69385
Q6NN28	RE21974p OS=Drosophila melanogaster GN=Tm1 PE=2 SV=1 - [Q6NN28_DROME]	41.229	31.58	2	1	7	14	2.91639e+06	285	32.7379	4.7417
Q9VLB7	GDP dissociation inhibitor, isoform A OS=Drosophila melanogaster GN=Gdi PE=2 SV=1 - [Q9VLB7_DROME]	40.7597	23.48	1	7	7	14	1.27968e+06	443	49.8714	5.71924
Q24560	Tubulin beta-1 chain OS=Drosophila melanogaster GN=betaTub56D PE=1 SV=2 - [TBB1_DROME]	40.4224	21.7	7	8	8	16	1.09075e+06	447	50.1151	4.85596
Q7JXC4	CG6459 OS=Drosophila melanogaster GN=P32 PE=2 SV=1 - [Q7JXC4_DROME]	40.2841	28.52	1	6	6	17	1.11149e+07	263	28.9574	5.08447
Q8MLY8	40S ribosomal protein S8 OS=Drosophila melanogaster GN=RpS8 PE=1 SV=1 - [RS8_DROME]	40.1713	36.54	1	6	6	11	9.62894e+06	208	23.7449	10.4771
Q9XYN7	Proteasome subunit beta type-3 OS=Drosophila melanogaster GN=Prosbeta3 PE=2 SV=1 - [PSB3_DROME]	39.5338	22.44	1	4	4	12	1.25665e+06	205	23.2184	5.43994
Q9VQ62	Protein NPC2 homolog OS=Drosophila melanogaster GN=Npc2a PE=1 SV=1 - [NPC2_DROME]	39.3027	42.57	1	6	6	15	8.38339e+06	148	16.0102	5.31299
P06754-1	Isoform D of Tropomyosin-1, isoforms 9A/A/B OS=Drosophila melanogaster GN=Tm1 - [TPM1_DROME]	38.1909	31.23	6	0	7	13	2.91639e+06	285	32.7258	4.729
P49455	Tropomyosin-1, isoforms 33/34 OS=Drosophila melanogaster GN=Tm1 PE=1 SV=2 - [TPM4_DROME]	38.1909	17.18	5	0	7	13	2.91639e+06	518	54.5522	4.41162
P84051	Histone H2A OS=Drosophila melanogaster GN=His2A PE=1 SV=2 - [H2A_DROME]	37.7813	31.45	3	3	3	11	7.50266e+07	124	13.3545	10.7261
Q9W229	40S ribosomal protein S24 OS=Drosophila melanogaster GN=RpS24 PE=1 SV=1 - [Q9W229_DROME]	37.3474	20.61	1	2	2	12	9.03816e+06	131	15.0382	11.2241
Q9XZJ4	Proteasome subunit alpha type-6 OS=Drosophila melanogaster GN=Prosalpha1 PE=1 SV=2 - [PSA6_DROME]	36.7126	31.56	1	7	7	15	9.19532e+06	244	27.1448	7.66455
Q9VAY2	Glycoprotein 93 OS=Drosophila melanogaster GN=Gp93 PE=2 SV=1 - [Q9VAY2_DROME]	35.9429	5.34	1	2	4	13	9.10996e+06	787	90.1825	5.021
P54397	39 kDa FK506-binding nuclear protein OS=Drosophila melanogaster GN=FK506-bp1 PE=1 SV=2 - [FKB39_DROME]	34.9632	26.33	1	10	10	16	7.44662e+06	357	39.3194	4.79248
P48149	40S ribosomal protein S15Aa OS=Drosophila melanogaster GN=RpS15Aa PE=1 SV=2 - [RS15A_DROME]	34.6502	53.08	2	6	6	13	5.46622e+06	130	14.7619	9.80322
Q9W227	Peptidyl-prolyl cis-trans isomerase OS=Drosophila melanogaster GN=CG2852 PE=2 SV=1 - [Q9W227_DROME]	33.5514	46.34	1	9	9	15	1.09087e+07	205	22.1855	8.74854
P48375	12 kDa FK506-binding protein OS=Drosophila melanogaster GN=FK506-bp2 PE=3 SV=2 - [FKB12_DROME]	33.4163	37.04	1	3	3	11	6.36478e+06	108	11.659	8.1333
Q9VHI8	CG11980, isoform A OS=Drosophila melanogaster GN=CG11980 PE=4 SV=2 - [Q9VHI8_DROME]	33.4022	33.33	3	9	9	13	3.44874e+06	345	39.1939	6.53662
Q9VMI5	CG9135 protein OS=Drosophila melanogaster GN=CG9135 PE=2 SV=1 - [Q9VMI5_DROME]	32.5235	18.48	1	6	6	10	1.93009e+06	487	53.426	7.18115
Q9W303	Chitinase-like protein Idgf4 OS=Drosophila melanogaster GN=Idgf4 PE=2 SV=1 - [IDGF4_DROME]	32.4791	16.74	1	5	6	11	1.37446e+06	442	48.5741	7.82568
Q9VLM8	Alanine--tRNA ligase, cytoplasmic OS=Drosophila melanogaster GN=Aats-ala PE=2 SV=1 - [SYAC_DROME]	32.4785	4.66	1	3	3	11	1.95849e+06	966	107.674	6.12549
P06754	Tropomyosin-1, isoforms 9A/A/B OS=Drosophila melanogaster GN=Tm1 PE=2 SV=2 - [TPM1_DROME]	32.4002	25.66	4	1	7	12	2.91639e+06	339	39.3013	4.94482
Q9V9S0	FI04419p OS=Drosophila melanogaster GN=Lamp1 PE=2 SV=3 - [Q9V9S0_DROME]	32.3533	11.64	1	3	3	9	4.07261e+06	318	34.8015	6.11279
Q03334	40S ribosomal protein S13 OS=Drosophila melanogaster GN=RpS13 PE=1 SV=3 - [RS13_DROME]	32.3239	29.8	1	5	5	12	9.63905e+06	151	17.1676	10.5503
Q9VK60	CG6180 OS=Drosophila melanogaster GN=CG6180 PE=2 SV=2 - [Q9VK60_DROME]	32.2193	34.24	1	5	5	12	5.0034e+06	257	28.6877	8.82178
Q9VKI8	CG6287 OS=Drosophila melanogaster GN=CG6287 PE=2 SV=1 - [Q9VKI8_DROME]	32.1791	31.63	1	8	8	12	2.38483e+06	332	35.2127	7.35693
P08736	Elongation factor 1-alpha 1 OS=Drosophila melanogaster GN=Ef1alpha48D PE=1 SV=2 - [EF1A1_DROME]	31.7195	17.28	2	7	7	15	1.48406e+07	463	50.2754	9.0708
Q95029-2	Isoform A of Cathepsin L OS=Drosophila melanogaster GN=Cp1 - [CATL_DROME]	31.7018	32.26	2	9	9	13	3.01897e+06	341	37.9466	6.58057
O02195	Eukaryotic translation initiation factor 3 subunit I OS=Drosophila melanogaster GN=Trip1 PE=1 SV=1 - [EIF3I_DROME]	31.6247	23.31	1	5	5	9	1.14883e+06	326	36.1366	5.33838
Q7KA66	Serine protease inhibitor 43Aa OS=Drosophila melanogaster GN=Spn43Aa PE=2 SV=1 - [Q7KA66_DROME]	31.616	25.13	1	7	7	12	2.91999e+06	390	44.7617	5.50342
Q7K485	CathD OS=Drosophila melanogaster GN=cathD PE=2 SV=1 - [Q7K485_DROME]	30.1064	29.59	1	6	7	10	1.8194e+06	392	42.4456	6.31592
P08928	Lamin Dm0 OS=Drosophila melanogaster GN=Lam PE=1 SV=4 - [LAM0_DROME]	29.9362	13.34	1	6	6	11	1.70988e+06	622	71.2574	6.46826
Q7KMM4	BcDNA.GH04962 OS=Drosophila melanogaster GN=BcDNA.GH04962 PE=2 SV=1 - [Q7KMM4_DROME]	29.7338	8.98	1	7	7	15	1.22055e+06	924	105.665	6.50732
Q59E58	Zipper, isoform C OS=Drosophila melanogaster GN=zip PE=4 SV=1 - [Q59E58_DROME]	29.5587	4.06	6	6	6	11	943764	1971	226.778	5.46533
Q06559	40S ribosomal protein S3 OS=Drosophila melanogaster GN=RpS3 PE=1 SV=1 - [RS3_DROME]	29.2388	24.8	1	6	6	12	2.14771e+06	246	27.4536	9.39307
P18053	Proteasome subunit alpha type-4 OS=Drosophila melanogaster GN=Prosalpha3 PE=1 SV=2 - [PSA4_DROME]	28.3682	35.23	1	7	7	11	4.19823e+06	264	29.3929	7.15186
Q24492	Replication protein A 70 kDa DNA-binding subunit OS=Drosophila melanogaster GN=RpA-70 PE=1 SV=1 - [RFA1_DROME]	28.2742	11.28	1	5	5	10	1.41308e+06	603	66.5824	6.75635
Q9VLC5	Aldehyde dehydrogenase OS=Drosophila melanogaster GN=Aldh PE=3 SV=1 - [Q9VLC5_DROME]	28.2563	13.85	1	5	5	9	2.26236e+06	520	56.983	6.80029
Q9VW68	CG7433, isoform A OS=Drosophila melanogaster GN=CG7433 PE=3 SV=1 - [Q9VW68_DROME]	27.7383	18.72	1	7	7	9	1.57754e+06	486	54.5504	8.6167
P35381	ATP synthase subunit alpha, mitochondrial OS=Drosophila melanogaster GN=blw PE=1 SV=2 - [ATPA_DROME]	27.6947	17.57	1	10	10	13	2.58679e+06	552	59.3844	9.01221
P07486	Glyceraldehyde-3-phosphate dehydrogenase 1 OS=Drosophila melanogaster GN=Gapdh1 PE=2 SV=2 - [G3P1_DROME]	27.0045	20.48	3	8	8	10	1.35017e+07	332	35.3282	8.17725
Q9VS34	60S ribosomal protein L18 OS=Drosophila melanogaster GN=RpL18 PE=1 SV=1 - [RL18_DROME]	26.9793	30.32	1	4	4	8	6.60309e+06	188	21.6511	11.5317
Q9VQB4	CG3609, isoform A OS=Drosophila melanogaster GN=CG3609 PE=2 SV=1 - [Q9VQB4_DROME]	26.6023	28.06	1	8	8	10	2.58858e+06	335	37.2623	7.51807
P91938-2	Isoform A of Thioredoxin reductase 1, mitochondrial OS=Drosophila melanogaster GN=Trxr-1 - [TRXR1_DROME]	26.3812	14.05	5	5	5	11	1.07992e+06	491	53.1895	6.32861
Q9VKW5	CG5355 OS=Drosophila melanogaster GN=CG5355 PE=2 SV=2 - [Q9VKW5_DROME]	25.9828	9.13	1	7	7	12	1.10182e+06	756	86.2574	6.18896
Q8IP94	Threonyl-tRNA synthetase, isoform B OS=Drosophila melanogaster GN=Aats-thr PE=3 SV=1 - [Q8IP94_DROME]	25.8877	11.16	2	7	7	10	1.34471e+06	690	79.2949	6.90283
Q9V6K1-2	Isoform 2 of Tripeptidyl-peptidase 2 OS=Drosophila melanogaster GN=TppII - [TPP2_DROME]	25.7305	8.05	2	9	9	12	1.19243e+06	1354	148.816	6.99072
Q94518	Nascent polypeptide-associated complex subunit alpha OS=Drosophila melanogaster GN=Nacalpha PE=1 SV=2 - [NACA_DROME]	25.3978	12.44	1	2	2	8	1.14668e+07	217	23.0067	4.7417
Q868Z9-5	Isoform C of Papilin OS=Drosophila melanogaster GN=Ppn - [PPN_DROME]	25.1737	4.37	4	6	6	9	650693	2174	231.619	4.48779
P09180	60S ribosomal protein L4 OS=Drosophila melanogaster GN=RpL4 PE=1 SV=2 - [RL4_DROME]	24.9654	20.95	6	8	8	12	6.87811e+06	401	44.9981	11.4731
M9PI17	CG6084, isoform D OS=Drosophila melanogaster GN=CG6084 PE=4 SV=1 - [M9PI17_DROME]	24.8038	37.97	4	10	10	13	6.50974e+06	316	35.8727	6.80029
Q9V895	Acidic leucine-rich nuclear phosphoprotein 32 family member A OS=Drosophila melanogaster GN=Anp32a PE=2 SV=1 - [AN32A_DROME]	24.6952	21.46	2	4	4	8	2.43097e+06	261	29.1587	4.2085
Q9I7R0	CG18815, isoform A OS=Drosophila melanogaster GN=CG18815 PE=2 SV=1 - [Q9I7R0_DROME]	24.6633	24.54	3	4	4	8	2.03162e+06	216	23.1477	6.27783
Q9VRD4	CG1532 OS=Drosophila melanogaster GN=CG1532 PE=4 SV=1 - [Q9VRD4_DROME]	24.6202	32.64	1	7	7	11	1.22745e+06	288	31.6228	5.38916
Q95RA9	CG9796 OS=Drosophila melanogaster GN=CG9796 PE=2 SV=1 - [Q95RA9_DROME]	24.3874	16.4	1	3	3	11	1.60584e+06	250	27.6737	7.32764
P41094	40S ribosomal protein S18 OS=Drosophila melanogaster GN=RpS18 PE=1 SV=1 - [RS18_DROME]	24.0697	36.84	1	6	6	9	5.53407e+06	152	17.6006	10.4771
Q9I7K5	Transmembrane emp24 domain-containing protein eca OS=Drosophila melanogaster GN=eca PE=2 SV=2 - [TMEDE_DROME]	23.6988	21.76	2	4	4	7	792843	216	25.1427	7.04932
P02518	Heat shock protein 27 OS=Drosophila melanogaster GN=Hsp27 PE=1 SV=2 - [HSP27_DROME]	23.2517	26.29	1	4	4	7	468853	213	23.602	7.44482
Q8IQU1	LD36620p OS=Drosophila melanogaster GN=verm PE=2 SV=1 - [Q8IQU1_DROME]	22.9779	15.24	3	7	7	11	2.02938e+06	525	59.5802	5.21143
Q9V3U6	26-29kD-proteinase OS=Drosophila melanogaster GN=26-29-p PE=2 SV=1 - [Q9V3U6_DROME]	22.7141	8.01	1	3	3	6	2.22121e+06	549	62.0903	6.7417
P41093	60S ribosomal protein L18a OS=Drosophila melanogaster GN=RpL18A PE=1 SV=1 - [RL18A_DROME]	22.5864	41.24	1	9	9	15	1.02614e+07	177	21.0164	10.6235
Q8IPB7	Lysosomal alpha-mannosidase, isoform B OS=Drosophila melanogaster GN=LM408 PE=4 SV=1 - [Q8IPB7_DROME]	21.9285	8.15	2	8	8	12	1.1721e+06	1080	122.659	5.73193
A0AQH0	Proteasome subunit beta type OS=Drosophila melanogaster GN=Prosbeta1 PE=2 SV=1 - [A0AQH0_DROME]	21.8326	44.2	1	6	6	12	2.78534e+06	224	24.2488	5.24951
P80455	40S ribosomal protein S12 OS=Drosophila melanogaster GN=RpS12 PE=1 SV=2 - [RS12_DROME]	21.6612	35.25	1	4	4	7	923423	139	15.1589	6.37939
Q9VDY8	MIP08680p OS=Drosophila melanogaster GN=vib PE=2 SV=1 - [Q9VDY8_DROME]	21.4225	31.25	1	7	7	10	1.54155e+06	272	31.2668	6.06201
Q9V464	Histone chaperone asf1 OS=Drosophila melanogaster GN=asf1 PE=1 SV=1 - [ASF1_DROME]	21.3623	18.35	1	3	3	7	2.40166e+06	218	24.3938	4.60205
P14130	40S ribosomal protein S14 OS=Drosophila melanogaster GN=RpS14a PE=1 SV=1 - [RS14_DROME]	21.2554	32.45	1	5	5	8	2.72479e+06	151	16.2547	10.3452
Q9VKX2	Malate dehydrogenase OS=Drosophila melanogaster GN=Mdh1 PE=2 SV=2 - [Q9VKX2_DROME]	20.9103	27.3	1	6	6	8	2.83888e+06	337	36.0356	7.38623
Q01604	Phosphoglycerate kinase OS=Drosophila melanogaster GN=Pgk PE=2 SV=2 - [PGK_DROME]	20.8236	20.96	1	7	7	8	1.75161e+06	415	43.834	7.41553
Q8MLS2	CG30410 OS=Drosophila melanogaster GN=Rpi PE=4 SV=3 - [Q8MLS2_DROME]	20.7859	39	1	7	7	9	2.84992e+06	241	26.5176	5.88428
Q7K2G1	Proteasomal ubiquitin receptor ADRM1 homolog OS=Drosophila melanogaster GN=Rpn13 PE=1 SV=1 - [ADRM1_DROME]	20.5447	7.46	2	2	2	6	468178	389	41.9864	5.64307
P15215	Laminin subunit gamma-1 OS=Drosophila melanogaster GN=LanB2 PE=2 SV=2 - [LAMC1_DROME]	20.1379	5.25	1	7	7	8	902488	1639	182.223	5.37646
Q9GU68	Eukaryotic translation initiation factor 5A OS=Drosophila melanogaster GN=eIF-5A PE=2 SV=2 - [IF5A_DROME]	19.958	30.19	1	5	5	9	2.83126e+06	159	17.5796	5.14795
Q0E9F9	CG2915, isoform A OS=Drosophila melanogaster GN=CG2915-RB PE=2 SV=1 - [Q0E9F9_DROME]	19.9335	18.1	2	7	7	9	1.12713e+06	453	51.0244	6.12549
Q9W1B9	RE28824p OS=Drosophila melanogaster GN=RpL12 PE=1 SV=1 - [Q9W1B9_DROME]	19.7823	24.24	1	3	3	7	6.23703e+06	165	17.6625	9.0708
Q9VCM8	CG4408 OS=Drosophila melanogaster GN=CG4408 PE=3 SV=2 - [Q9VCM8_DROME]	19.7167	14.41	1	6	6	9	560332	479	54.3512	6.32861
P22700-2	Isoform A of Calcium-transporting ATPase sarcoplasmic/endoplasmic reticulum type OS=Drosophila melanogaster GN=Ca-P60A - [ATC1_DROME]	19.3754	6.09	2	5	5	8	594465	1002	109.542	5.33838
O97102	LD07775p OS=Drosophila melanogaster GN=smt3 PE=1 SV=1 - [O97102_DROME]	19.299	34.44	1	3	3	8	5.62322e+06	90	10.118	5.45264
Q9VFQ9	Dipeptidase B, isoform A OS=Drosophila melanogaster GN=Dip-B PE=2 SV=2 - [Q9VFQ9_DROME]	19.2678	11.42	1	4	4	6	1.47317e+06	508	55.4986	6.75635
Q9V597	60S ribosomal protein L31 OS=Drosophila melanogaster GN=RpL31 PE=1 SV=1 - [RL31_DROME]	19.1271	33.87	1	4	4	7	2.35652e+06	124	14.5237	10.1987
P48610	Arginine kinase OS=Drosophila melanogaster GN=Argk PE=2 SV=2 - [KARG_DROME]	19.011	15.45	5	4	4	8	1.7435e+06	356	39.8412	6.46826
P48809	Heterogeneous nuclear ribonucleoprotein 27C OS=Drosophila melanogaster GN=Hrb27C PE=1 SV=2 - [RB27C_DROME]	18.6656	6.65	1	2	2	6	1.2924e+06	421	44.7417	6.80029
P29843	Heat shock 70 kDa protein cognate 1 OS=Drosophila melanogaster GN=Hsc70-1 PE=1 SV=1 - [HSP7A_DROME]	18.653	12.64	3	1	6	9	8.28445e+06	641	70.6429	5.49072
P32100	60S ribosomal protein L7 OS=Drosophila melanogaster GN=RpL7 PE=1 SV=2 - [RL7_DROME]	18.3815	23.41	1	7	7	11	5.0547e+06	252	29.5336	10.8872
Q00637	Superoxide dismutase [Mn], mitochondrial OS=Drosophila melanogaster GN=Sod2 PE=2 SV=3 - [SODM_DROME]	18.1817	19.82	1	3	3	6	3.69523e+06	217	24.6687	8.14795
Q7JR49	CG8029, isoform A OS=Drosophila melanogaster GN=VhaAC45 PE=2 SV=1 - [Q7JR49_DROME]	18.0508	6.6	1	2	2	7	1.49697e+06	379	41.0974	5.09717
Q9W0A8	FI01658p OS=Drosophila melanogaster GN=RpL23A PE=1 SV=1 - [Q9W0A8_DROME]	17.9767	19.13	1	5	5	10	2.34545e+06	277	29.4451	10.9458
Q9I7P8	CG4365, isoform B OS=Drosophila melanogaster GN=CG4365 PE=3 SV=1 - [Q9I7P8_DROME]	17.8968	27.68	3	6	6	7	1.44384e+06	271	30.3231	6.07471
Q9VFF0	CG3731, isoform A OS=Drosophila melanogaster GN=CG3731 PE=2 SV=2 - [Q9VFF0_DROME]	17.7834	4.68	1	2	2	6	1.31483e+06	470	51.8411	5.99854
Q7K148	Proteasome subunit beta type OS=Drosophila melanogaster GN=Prosbeta5 PE=2 SV=1 - [Q7K148_DROME]	17.624	11.35	1	3	3	7	4.16254e+06	282	31.1413	6.93213
Q9VG16	Granny smith, isoform D OS=Drosophila melanogaster GN=grsm PE=4 SV=3 - [Q9VG16_DROME]	17.5953	9.76	2	4	4	6	825547	533	57.1749	6.21436
Q9V813	S-methyl-5'-thioadenosine phosphorylase OS=Drosophila melanogaster GN=Mtap PE=1 SV=1 - [MTAP_DROME]	17.452	21.11	1	5	5	8	1.11599e+06	289	31.9972	6.43018
P29613	Triosephosphate isomerase OS=Drosophila melanogaster GN=Tpi PE=1 SV=3 - [TPIS_DROME]	17.2759	31.17	2	6	6	8	2.28718e+06	247	26.6087	5.99854
P17917	Proliferating cell nuclear antigen OS=Drosophila melanogaster GN=PCNA PE=1 SV=2 - [PCNA_DROME]	16.9405	18.46	2	4	4	6	3.26543e+06	260	28.8111	4.80518
Q9VJJ0	Proteasome subunit beta type OS=Drosophila melanogaster GN=Prosbeta4 PE=1 SV=1 - [Q9VJJ0_DROME]	16.6274	37.31	1	5	5	7	2.04592e+06	201	22.4674	6.39209
P26270	26S proteasome non-ATPase regulatory subunit 7 OS=Drosophila melanogaster GN=Rpn8 PE=1 SV=6 - [PSMD7_DROME]	16.5125	18.34	1	4	4	7	1.94467e+06	338	38.0655	6.7124
O46067	CG2918, isoform A OS=Drosophila melanogaster GN=EG:25E8.1 PE=2 SV=1 - [O46067_DROME]	16.3997	5.85	1	4	4	6	683247	923	103.382	5.12256
Q00174	Laminin subunit alpha OS=Drosophila melanogaster GN=LanA PE=1 SV=2 - [LAMA_DROME]	16.3331	2.75	1	9	9	11	1.02434e+06	3712	410.893	5.22412
Q0E924	LD46344p OS=Drosophila melanogaster GN=Phb2 PE=2 SV=2 - [Q0E924_DROME]	15.8709	21.4	3	6	6	8	3.51432e+06	299	33.0457	9.53955
Q7KRU8	Ferritin 1 heavy chain homologue, isoform A OS=Drosophila melanogaster GN=Fer1HCH PE=2 SV=1 - [Q7KRU8_DROME]	15.8152	24.39	2	4	4	6	5.3523e+06	205	23.1308	5.87158
P46863	Bipolar kinesin KRP-130 OS=Drosophila melanogaster GN=Klp61F PE=1 SV=2 - [KL61_DROME]	15.777	5.72	1	4	4	6	388768	1066	121.088	6.43018
Q27415-2	Isoform 2 of Nucleoplasmin-like protein OS=Drosophila melanogaster GN=Nlp - [NLP_DROME]	15.7713	29.75	2	3	3	6	1.39334e+06	121	13.5228	4.81787
Q9VRD6	GM08921p OS=Drosophila melanogaster GN=Ntf-2 PE=2 SV=1 - [Q9VRD6_DROME]	15.6238	28.46	4	3	3	5	2.30382e+06	130	14.5562	5.73193
P38979-2	Isoform A of 40S ribosomal protein SA OS=Drosophila melanogaster GN=sta - [RSSA_DROME]	15.5539	21.85	2	4	4	6	793225	270	30.2094	4.86865
Q9VN44	FI07923p OS=Drosophila melanogaster GN=Karybeta3 PE=2 SV=1 - [Q9VN44_DROME]	15.5417	4.89	1	4	4	6	777608	1105	123.482	4.729
Q9V535	RNA-binding protein 8A OS=Drosophila melanogaster GN=tsu PE=1 SV=1 - [RBM8A_DROME]	15.367	25.45	1	5	5	7	2.71249e+06	165	18.9984	5.2749
P50887	60S ribosomal protein L22 OS=Drosophila melanogaster GN=RpL22 PE=1 SV=2 - [RL22_DROME]	15.2238	11.71	1	4	4	9	5.82254e+06	299	30.5919	10.1108
Q9VH81	GH12714p OS=Drosophila melanogaster GN=PpD3 PE=2 SV=1 - [Q9VH81_DROME]	15.0241	9.42	1	4	4	6	854769	520	59.225	6.22705
P15278-2	Isoform B of Fasciclin-3 OS=Drosophila melanogaster GN=Fas3 - [FAS3_DROME]	15.0019	17.71	4	5	5	6	2.48822e+06	401	44.1545	5.96045
M9MS86	Mucin related 2B, isoform B OS=Drosophila melanogaster GN=Mur2B PE=4 SV=1 - [M9MS86_DROME]	14.7704	3.67	2	4	4	6	926932	1144	124.187	9.24658
Q9VFC2	GH14439p OS=Drosophila melanogaster GN=Spn88Ea PE=2 SV=1 - [Q9VFC2_DROME]	14.5268	18.97	2	8	8	9	1.465e+06	427	48.4456	5.5542
Q9VH95	Uncharacterized protein CG16817 OS=Drosophila melanogaster GN=CG16817 PE=1 SV=1 - [YC17_DROME]	14.4649	20.65	1	4	4	6	4.71726e+06	184	20.7399	4.60205
P62152	Calmodulin OS=Drosophila melanogaster GN=Cam PE=1 SV=2 - [CALM_DROME]	14.4629	24.83	1	4	4	12	1.47942e+06	149	16.7998	4.22119
P20477	Glutamine synthetase 1, mitochondrial OS=Drosophila melanogaster GN=Gs1 PE=2 SV=3 - [GLNA1_DROME]	14.1793	5.76	1	2	2	5	757370	399	44.3684	6.45557
P36951	Putative hydroxypyruvate isomerase OS=Drosophila melanogaster GN=Gip PE=1 SV=1 - [HYI_DROME]	14.1405	17.05	1	3	3	5	427140	264	29.0749	6.53662
Q08473-3	Isoform C of RNA-binding protein squid OS=Drosophila melanogaster GN=sqd - [SQD_DROME]	13.7311	16.56	3	4	4	4	3.65264e+06	308	33.0338	6.96143
Q9VCK0	Eukaryotic translation initiation factor 3 subunit D-1 OS=Drosophila melanogaster GN=eIF-3p66 PE=1 SV=1 - [EI3D1_DROME]	13.6721	2.5	1	1	1	4	6.4518e+06	560	63.7577	7.02002
P05389	60S acidic ribosomal protein P2 OS=Drosophila melanogaster GN=RpLP2 PE=1 SV=1 - [RLA2_DROME]	13.649	29.2	1	3	3	6	7.32323e+06	113	11.75	4.70361
Q9VN25-2	Isoform B of Eukaryotic translation initiation factor 3 subunit A OS=Drosophila melanogaster GN=eIF3-S10 - [EIF3A_DROME]	13.6096	4.48	2	6	6	7	1.52218e+06	1072	125.746	9.02686
M9PFH6	Failed axon connections, isoform E OS=Drosophila melanogaster GN=fax PE=4 SV=1 - [M9PFH6_DROME]	13.4788	19.93	6	5	5	6	1.07626e+06	271	31.1688	5.61768
Q9V9W2	Ribosomal protein L6, isoform A OS=Drosophila melanogaster GN=RpL6 PE=1 SV=1 - [Q9V9W2_DROME]	13.4638	5.76	2	1	1	4	3.87861e+06	243	27.6806	10.6821
Q7KMP8	26S proteasome regulatory complex subunit p39A OS=Drosophila melanogaster GN=Rpn9 PE=1 SV=1 - [Q7KMP8_DROME]	13.4455	9.95	1	4	4	6	692579	382	43.7386	5.26221
Q76NQ0	CG33303, isoform A OS=Drosophila melanogaster GN=CG33303 PE=4 SV=1 - [Q76NQ0_DROME]	13.4266	10.26	1	4	4	7	2.49467e+06	458	51.6774	8.04541
P54385-2	Isoform C of Glutamate dehydrogenase, mitochondrial OS=Drosophila melanogaster GN=Gdh - [DHE3_DROME]	13.3488	7.83	3	4	4	8	1.14831e+06	549	61.0432	8.39697
Q9VPX7	Adenylyl cyclase-associated protein OS=Drosophila melanogaster GN=capt PE=3 SV=2 - [Q9VPX7_DROME]	13.1718	16.04	2	6	6	8	1.97707e+06	424	45.5762	7.06396
P41042	40S ribosomal protein S4 OS=Drosophila melanogaster GN=RpS4 PE=1 SV=2 - [RS4_DROME]	13.111	27.59	2	7	7	7	3.80237e+06	261	29.1159	10.1841
Q9NFU0-3	Isoform E of Fragile X mental retardation syndrome-related protein 1 OS=Drosophila melanogaster GN=Fmr1 - [FMR1_DROME]	12.8285	6.38	5	3	3	4	657143	643	71.6926	9.12939
Q9VSA3	Probable medium-chain specific acyl-CoA dehydrogenase, mitochondrial OS=Drosophila melanogaster GN=CG12262 PE=1 SV=1 - [ACADM_DROME]	12.7748	11.46	1	4	4	6	815290	419	45.8424	7.94287
Q8IPE8	Mitochondrial trifunctional protein alpha subunit, isoform B OS=Drosophila melanogaster GN=Mtpalpha PE=3 SV=1 - [Q8IPE8_DROME]	12.6059	8.33	2	5	5	5	975738	744	79.5882	8.85107
Q8MPN5	Serine protease inhibitor 4, isoform J OS=Drosophila melanogaster GN=Spn42Da PE=2 SV=1 - [Q8MPN5_DROME]	12.5604	14.71	8	5	5	6	2.31018e+06	374	42.0547	7.1665
P48159	60S ribosomal protein L23 OS=Drosophila melanogaster GN=RpL23 PE=1 SV=2 - [RL23_DROME]	12.491	24.29	1	3	3	5	2.39561e+06	140	14.927	10.8286
P52486	Ubiquitin-conjugating enzyme E2-22 kDa OS=Drosophila melanogaster GN=UbcD4 PE=1 SV=2 - [UBCD4_DROME]	12.3739	7.54	1	1	1	4	1.18886e+06	199	22.4955	5.46533
Q9VJD1	CG6453, isoform A OS=Drosophila melanogaster GN=CG6453 PE=2 SV=1 - [Q9VJD1_DROME]	12.2919	9.49	1	5	5	5	2.57812e+06	548	61.5012	4.4624
P13008	40S ribosomal protein S26 OS=Drosophila melanogaster GN=RpS26 PE=1 SV=1 - [RS26_DROME]	12.1219	21.05	1	2	2	4	4.01516e+06	114	13.2582	11.1509
Q86BQ4	CG2862, isoform B OS=Drosophila melanogaster GN=CG2862 PE=4 SV=1 - [Q86BQ4_DROME]	12.1203	34.13	2	3	3	6	993205	126	13.8362	7.23975
M9PHN8	Adenosylhomocysteinase OS=Drosophila melanogaster GN=Ahcy13 PE=3 SV=1 - [M9PHN8_DROME]	12.0946	22.6	2	6	6	6	782027	323	35.57	6.0874
P55841	60S ribosomal protein L14 OS=Drosophila melanogaster GN=RpL14 PE=1 SV=1 - [RL14_DROME]	12.0942	24.1	1	5	5	7	4.57952e+06	166	19.1618	11.1802
Q9VSD6	D-Importin 7/RanBP7 OS=Drosophila melanogaster GN=msk PE=2 SV=1 - [Q9VSD6_DROME]	12.0182	1.33	1	1	1	3	364476	1049	119.234	4.85596
Q8MS37	RE15579p OS=Drosophila melanogaster GN=tyn PE=2 SV=1 - [Q8MS37_DROME]	11.9723	5.73	1	3	3	4	606803	715	80.6301	5.90967
Q9VVA6	Nuclear migration protein NudC OS=Drosophila melanogaster GN=nudC PE=2 SV=2 - [Q9VVA6_DROME]	11.8473	11.45	1	3	3	4	1.73093e+06	332	37.7684	5.64307
P06604	Tubulin alpha-2 chain OS=Drosophila melanogaster GN=alphaTub85E PE=1 SV=1 - [TBA2_DROME]	11.8145	7.8	1	1	3	5	1.06831e+06	449	49.9346	5.19873
Q8IPB1	Deoxyuridine triphosphatase, isoform B OS=Drosophila melanogaster GN=dUTPase PE=2 SV=1 - [Q8IPB1_DROME]	11.7052	32.18	2	5	5	6	5.30293e+06	174	18.4735	5.42725
Q9VTW6	CG10418 OS=Drosophila melanogaster GN=CG10418 PE=4 SV=1 - [Q9VTW6_DROME]	11.6809	20	1	1	1	3	2.82556e+06	95	10.7306	6.52197
Q9VV60	LD21116p OS=Drosophila melanogaster GN=Aats-tyr PE=2 SV=1 - [Q9VV60_DROME]	11.4903	7.81	1	4	4	5	1.26907e+06	525	58.1225	6.87354
Q7KVQ0	Probable H/ACA ribonucleoprotein complex subunit 1 OS=Drosophila melanogaster GN=CG4038 PE=1 SV=1 - [GAR1_DROME]	11.2966	18.14	1	3	3	5	733666	237	22.6513	11.1948
Q8T0N3	CG30359, isoform B OS=Drosophila melanogaster GN=Mal-A5 PE=2 SV=1 - [Q8T0N3_DROME]	11.1868	7.12	2	3	3	5	946932	534	61.5577	5.73193
P61209	ADP-ribosylation factor 1 OS=Drosophila melanogaster GN=Arf79F PE=2 SV=2 - [ARF1_DROME]	11.1143	21.43	1	1	3	4	1.47187e+06	182	20.6747	6.58057
P42207	Septin-1 OS=Drosophila melanogaster GN=Sep1 PE=1 SV=1 - [SEPT1_DROME]	11.0827	3.05	1	1	1	4	770983	361	41.1051	6.55127
Q9V3G1	60S ribosomal protein L8 OS=Drosophila melanogaster GN=RpL8 PE=1 SV=1 - [RL8_DROME]	10.9687	18.36	1	4	4	6	6.61117e+06	256	27.8752	11.1509
P13469	DNA-binding protein modulo OS=Drosophila melanogaster GN=mod PE=1 SV=2 - [MODU_DROME]	10.8052	6.64	1	3	3	4	463601	542	60.2732	5.42725
P55830-2	Isoform B of 40S ribosomal protein S3a OS=Drosophila melanogaster GN=RpS3A - [RS3A_DROME]	10.7851	19.72	2	4	4	4	1.57276e+06	218	24.8061	9.08545
P15364	Protein amalgam OS=Drosophila melanogaster GN=Ama PE=2 SV=2 - [AMAL_DROME]	10.7666	16.22	2	5	5	6	3.48294e+06	333	36.3646	7.03467
P40945	ADP-ribosylation factor 2 OS=Drosophila melanogaster GN=Arf102F PE=2 SV=2 - [ARF2_DROME]	10.7573	21.67	1	1	3	4	1.1325e+06	180	20.6038	7.38623
P09491	Tropomyosin-2 OS=Drosophila melanogaster GN=Tm2 PE=2 SV=1 - [TPM2_DROME]	10.7003	9.51	2	2	2	3	550223	284	32.9606	4.83057
Q9VGP6	Prefoldin subunit 3 OS=Drosophila melanogaster GN=mgr PE=1 SV=3 - [PFD3_DROME]	10.6738	15.98	1	3	3	6	1.53247e+06	194	22.3003	5.10986
Q0KI00	FI20034p1 OS=Drosophila melanogaster GN=SP1029 PE=2 SV=1 - [Q0KI00_DROME]	10.628	5.26	1	4	4	4	571298	932	107.954	6.59521
O18335	Drab11 OS=Drosophila melanogaster GN=Rab11 PE=2 SV=1 - [O18335_DROME]	10.6202	20.56	1	4	4	5	1.32838e+06	214	24.2305	5.73193
O96827	Probable elongation factor 1-beta OS=Drosophila melanogaster GN=Ef1beta PE=1 SV=3 - [EF1B_DROME]	10.5509	15.32	1	3	3	4	812979	222	24.2321	4.57666
P06603	Tubulin alpha-1 chain OS=Drosophila melanogaster GN=alphaTub84B PE=2 SV=1 - [TBA1_DROME]	10.3795	8	2	1	3	5	2.24138e+06	450	49.8765	5.13525
Q23997	Chitinase-like protein CG5210 OS=Drosophila melanogaster GN=CG5210 PE=1 SV=2 - [C5210_DROME]	10.3357	9.07	1	3	4	5	1.27262e+06	452	50.3231	7.89893
Q9V3P6-2	Isoform B of 26S proteasome non-ATPase regulatory subunit 1 OS=Drosophila melanogaster GN=Rpn2 - [PSMD1_DROME]	10.2251	3.49	2	2	2	3	182685	946	104.744	5.24951
Q4V6M1	Diadenosine tetraphosphate hydrolase OS=Drosophila melanogaster GN=Apf PE=2 SV=1 - [Q4V6M1_DROME]	9.99237	26.76	1	3	3	5	741442	142	16.5693	5.37646
P40301	Proteasome subunit alpha type-2 OS=Drosophila melanogaster GN=Prosalpha2 PE=1 SV=1 - [PSA2_DROME]	9.95595	14.53	1	3	3	4	3.05989e+06	234	25.8901	6.68311
Q8IMH4	Saposin-related, isoform B OS=Drosophila melanogaster GN=Sap-r PE=4 SV=2 - [Q8IMH4_DROME]	9.82003	2.74	2	3	3	5	4.78048e+06	876	97.554	4.90674
M9PD27	Eukaryotic release factor 1, isoform H OS=Drosophila melanogaster GN=eRF1 PE=4 SV=1 - [M9PD27_DROME]	9.76829	10.53	3	4	4	4	2.04185e+06	437	48.9612	6.0874
Q9VL89	Methionine aminopeptidase 2 OS=Drosophila melanogaster GN=und PE=2 SV=1 - [Q9VL89_DROME]	9.65362	6.7	1	3	3	5	1.95905e+06	448	49.7729	6.68311
Q9VJ39	CG10602, isoform B OS=Drosophila melanogaster GN=CG10602 PE=4 SV=3 - [Q9VJ39_DROME]	9.62911	7.99	1	5	5	7	1.48027e+06	613	68.4462	5.50342
P31009	40S ribosomal protein S2 OS=Drosophila melanogaster GN=RpS2 PE=1 SV=2 - [RS2_DROME]	9.55049	17.23	1	4	4	4	2.4252e+06	267	28.8814	10.1548
M9PGB6	CG7519, isoform B OS=Drosophila melanogaster GN=CG7519 PE=4 SV=1 - [M9PGB6_DROME]	9.52899	14.57	2	2	2	4	599060	151	17.5907	5.2749
A1ZA89	Dystroglycan, isoform B OS=Drosophila melanogaster GN=Dg PE=4 SV=1 - [A1ZA89_DROME]	9.48875	2.74	3	2	2	3	852825	914	102.57	6.3667
Q9VWD9	LD38919p OS=Drosophila melanogaster GN=Ubqn PE=1 SV=1 - [Q9VWD9_DROME]	9.4048	5.3	1	2	2	3	907952	547	58.7985	5.10986
Q9VNH5	CG2091 OS=Drosophila melanogaster GN=CG2091 PE=2 SV=1 - [Q9VNH5_DROME]	9.35928	11.23	1	4	4	5	1.31293e+06	374	42.9708	5.30029
Q9W0S6	IP18235p OS=Drosophila melanogaster GN=mRpL17 PE=2 SV=2 - [Q9W0S6_DROME]	9.28838	17.05	1	3	3	5	474347	176	20.8521	9.94971
Q9V3A8	Ergic53, isoform A OS=Drosophila melanogaster GN=ergic53 PE=2 SV=1 - [Q9V3A8_DROME]	9.28795	2.73	1	1	1	3	388511	512	57.5327	6.07471
Q9VZ23	GTP-binding nuclear protein Ran OS=Drosophila melanogaster GN=ran PE=1 SV=1 - [RAN_DROME]	9.27114	15.74	1	3	3	4	2.56883e+06	216	24.6927	7.81104
Q9W392	CG7033 OS=Drosophila melanogaster GN=CG7033 PE=2 SV=2 - [Q9W392_DROME]	9.25676	1.87	1	1	1	3	603876	535	58.0273	5.84619
P46415	Alcohol dehydrogenase class-3 OS=Drosophila melanogaster GN=Fdh PE=1 SV=3 - [ADHX_DROME]	9.1687	6.33	1	2	2	3	1.94917e+06	379	40.3636	6.7124
P23779	Cystatin-like protein OS=Drosophila melanogaster GN=Cys PE=2 SV=2 - [CYTL_DROME]	9.14978	17.46	1	1	1	2	182125	126	13.4289	4.75439
P00408	Cytochrome c oxidase subunit 2 OS=Drosophila melanogaster GN=mt:CoII PE=3 SV=1 - [COX2_DROME]	9.01948	20.18	1	3	3	4	1.01869e+06	228	26.1734	5.09717
Q9XTL9	Glycogen phosphorylase OS=Drosophila melanogaster GN=GlyP PE=2 SV=2 - [PYG_DROME]	8.96414	4.86	1	4	4	5	950010	844	96.9352	6.52197
Q7K127	CG7997, isoform A OS=Drosophila melanogaster GN=CG7997 PE=2 SV=1 - [Q7K127_DROME]	8.95629	3.6	1	1	1	2	1.00422e+06	417	47.3733	5.41455
P55828	40S ribosomal protein S20 OS=Drosophila melanogaster GN=RpS20 PE=1 SV=1 - [RS20_DROME]	8.71716	22.5	1	2	2	6	7.77614e+06	120	13.4793	10.3306
Q9VXI3	CG9911, isoform C OS=Drosophila melanogaster GN=CG9911 PE=4 SV=1 - [Q9VXI3_DROME]	8.71504	8.8	2	3	3	4	395346	375	43.3209	5.87158
Q24186	40S ribosomal protein S5a OS=Drosophila melanogaster GN=RpS5a PE=1 SV=1 - [RS5A_DROME]	8.70818	6.58	1	1	1	2	220106	228	25.4183	8.63135
Q26365-2	Isoform A of ADP,ATP carrier protein OS=Drosophila melanogaster GN=sesB - [ADT_DROME]	8.68079	16.39	3	5	5	8	1.34998e+06	299	32.8881	9.77393
Q7JR58	CG6543, isoform A OS=Drosophila melanogaster GN=CG6543 PE=2 SV=1 - [Q7JR58_DROME]	8.60638	9.15	1	2	2	3	1.35324e+06	295	31.5621	8.63135
P41043	Glutathione S-transferase S1 OS=Drosophila melanogaster GN=GstS1 PE=1 SV=2 - [GST1_DROME]	8.59276	16.87	1	3	3	4	966594	249	27.596	4.65283
Q9VQ29	Cytochrome b-c1 complex subunit Rieske, mitochondrial OS=Drosophila melanogaster GN=RFeSP PE=2 SV=3 - [Q9VQ29_DROME]	8.57704	20.87	1	3	3	5	4.13229e+06	230	24.8566	8.67529
P08570	60S acidic ribosomal protein P1 OS=Drosophila melanogaster GN=RpLP1 PE=1 SV=2 - [RLA1_DROME]	8.54078	21.43	1	2	2	3	4.72205e+06	112	11.5058	4.41162
Q24372-2	Isoform B of Lachesin OS=Drosophila melanogaster GN=Lac - [LACH_DROME]	8.50999	8.33	2	2	2	3	991163	252	28.1771	4.98291
P04359	60S ribosomal protein L32 OS=Drosophila melanogaster GN=RpL32 PE=1 SV=3 - [RL32_DROME]	8.50071	17.91	1	2	2	3	1.0421e+06	134	16.0098	11.3999
Q9V9X1	CG12063 OS=Drosophila melanogaster GN=mey PE=4 SV=3 - [Q9V9X1_DROME]	8.47115	4.26	1	2	3	4	635095	774	83.8285	5.17334
P19889	60S acidic ribosomal protein P0 OS=Drosophila melanogaster GN=RpLP0 PE=1 SV=1 - [RLA0_DROME]	8.43801	9.46	1	3	3	5	776143	317	34.1809	6.94678
Q0E993	Valyl-tRNA synthetase, isoform A OS=Drosophila melanogaster GN=Aats-val PE=3 SV=1 - [Q0E993_DROME]	8.4364	1.24	1	1	1	2	933654	1049	118.179	6.65381
Q9V9X0	CG1499, isoform C OS=Drosophila melanogaster GN=nyo PE=2 SV=2 - [Q9V9X0_DROME]	8.26553	3.85	2	2	3	5	445986	805	87.757	5.21143
Q9VFE4	40S ribosomal protein S5b OS=Drosophila melanogaster GN=RpS5b PE=2 SV=1 - [RS5B_DROME]	8.24714	6.52	1	1	1	2	599392	230	25.7003	8.54346
Q9W3W8	60S ribosomal protein L17 OS=Drosophila melanogaster GN=RpL17 PE=1 SV=1 - [RL17_DROME]	8.2405	10.75	1	2	2	4	4.8015e+06	186	21.5794	10.3013
Q9W2N0	F-actin-capping protein subunit alpha OS=Drosophila melanogaster GN=cpa PE=2 SV=1 - [CAPZA_DROME]	8.16609	10.14	1	2	2	4	956750	286	32.7393	5.93506
Q9VHX4	CG2767, isoform A OS=Drosophila melanogaster GN=CG2767 PE=2 SV=1 - [Q9VHX4_DROME]	8.13782	9.73	2	3	3	3	3.36342e+06	329	36.8391	5.98584
P26686-3	Isoform B of Serine-arginine protein 55 OS=Drosophila melanogaster GN=B52 - [SRR55_DROME]	8.01317	8.21	8	3	3	4	2.24585e+06	329	37.5135	11.4731
O18333	GH01619p OS=Drosophila melanogaster GN=Rab2 PE=2 SV=1 - [O18333_DROME]	7.93254	17.37	1	3	3	3	387713	213	23.5458	6.39209
Q95TP9	40S ribosomal protein S6 OS=Drosophila melanogaster GN=RpS6 PE=2 SV=1 - [Q95TP9_DROME]	7.89293	12.44	3	2	2	3	2.09361e+06	217	24.681	11.063
O18334	Ras-related protein Rab6 OS=Drosophila melanogaster GN=Rab6 PE=1 SV=1 - [RAB6_DROME]	7.68315	16.35	19	2	3	3	1.51236e+06	208	23.4657	5.36377
Q8IQZ8	FI20019p1 OS=Drosophila melanogaster GN=Fim PE=2 SV=1 - [Q8IQZ8_DROME]	7.65144	5.68	3	3	3	3	365867	616	69.0914	5.77002
Q7KM15	Beta NAC homolog OS=Drosophila melanogaster GN=bic PE=2 SV=1 - [Q7KM15_DROME]	7.64528	23.67	1	3	3	3	1.29074e+06	169	17.7273	7.48877
Q27268	ATP-dependent RNA helicase WM6 OS=Drosophila melanogaster GN=Hel25E PE=1 SV=1 - [DX39B_DROME]	7.60527	11.79	8	5	5	6	1.12563e+06	424	48.6207	5.65576
Q9VIH3	Microsomal triacylglycerol transfer protein OS=Drosophila melanogaster GN=Mtp PE=4 SV=2 - [Q9VIH3_DROME]	7.51218	3.95	1	3	3	3	397474	886	98.7153	6.06201
Q9VDL2	LD40493p OS=Drosophila melanogaster GN=TFAM PE=2 SV=1 - [Q9VDL2_DROME]	7.50502	8.56	2	2	2	3	502141	257	29.9451	9.99365
Q8SXR1	Neural lazarillo, isoform A OS=Drosophila melanogaster GN=NLaz PE=2 SV=1 - [Q8SXR1_DROME]	7.48231	16.96	2	2	2	2	203765	224	24.3182	5.05908
Q9VMQ9	Clot protein OS=Drosophila melanogaster GN=cl PE=2 SV=1 - [Q9VMQ9_DROME]	7.43094	11.11	1	1	1	3	482087	126	14.6511	5.5415
Q9VV75	AT02348p OS=Drosophila melanogaster GN=CG4169 PE=2 SV=1 - [Q9VV75_DROME]	7.43001	7.05	1	2	2	2	320432	440	45.3879	9.43701
P48148	Ras-like GTP-binding protein Rho1 OS=Drosophila melanogaster GN=Rho1 PE=1 SV=1 - [RHO1_DROME]	7.38888	14.58	1	2	2	2	1.23133e+06	192	21.7092	7.00537
Q9W414	Regulatory particle triple-A ATPase 4 OS=Drosophila melanogaster GN=Rpt4 PE=3 SV=3 - [Q9W414_DROME]	7.38196	6.05	1	2	2	3	554314	397	44.8828	8.07471
Q9VB64	CG31063 OS=Drosophila melanogaster GN=CG31063 PE=4 SV=2 - [Q9VB64_DROME]	7.36067	3.71	1	1	1	2	376874	404	44.4393	4.86865
P20241-2	Isoform A of Neuroglian OS=Drosophila melanogaster GN=Nrg - [NRG_DROME]	7.32173	2.99	3	3	3	3	633466	1239	138.276	5.49072
Q9W499	FI02809p OS=Drosophila melanogaster GN=RpL35 PE=1 SV=2 - [Q9W499_DROME]	7.30169	16.26	1	2	2	3	1.95261e+06	123	14.4406	11.1802
Q8IRQ5	LP02262p OS=Drosophila melanogaster GN=l(1)G0255 PE=2 SV=1 - [Q8IRQ5_DROME]	7.27925	4.5	2	2	2	3	2.28915e+06	467	50.4279	7.53271
Q9VNA3	CG11999 OS=Drosophila melanogaster GN=CG11999 PE=2 SV=1 - [Q9VNA3_DROME]	7.24807	11.57	1	2	2	3	310108	216	23.6186	6.80029
Q9VA83	AT19513p OS=Drosophila melanogaster GN=Fer2LCH PE=2 SV=1 - [Q9VA83_DROME]	7.24007	18.06	1	3	3	3	1.72505e+06	227	25.2266	6.34131
O97477	Inositol-3-phosphate synthase OS=Drosophila melanogaster GN=Inos PE=1 SV=1 - [INO1_DROME]	7.20191	8.85	1	4	4	4	885088	565	62.2108	6.22705
Q9VUJ1	Proteasome subunit beta type OS=Drosophila melanogaster GN=Prosbeta2 PE=2 SV=1 - [Q9VUJ1_DROME]	7.19657	15.81	2	4	4	5	1.03679e+06	272	29.8083	8.66064
P41073-3	Isoform C of Zinc finger protein on ecdysone puffs OS=Drosophila melanogaster GN=Pep - [PEP_DROME]	7.15686	3.9	2	2	2	5	738572	693	75.5525	5.43994
Q9V3Z4	GH11341p OS=Drosophila melanogaster GN=Rpn5 PE=2 SV=1 - [Q9V3Z4_DROME]	7.14259	4.78	1	2	2	5	551332	502	57.7106	5.79541
Q9VBU7	Nup358 OS=Drosophila melanogaster GN=Nup358 PE=4 SV=2 - [Q9VBU7_DROME]	7.14024	0.67	1	2	2	3	773832	2695	296.201	6.0874
Q9VHR8-2	Isoform 2 of Dipeptidyl peptidase 3 OS=Drosophila melanogaster GN=DppIII - [DPP3_DROME]	7.13096	4.29	2	3	3	3	2.12995e+06	723	81.8857	5.70654
Q9V438	Calcium-binding protein 1 OS=Drosophila melanogaster GN=CaBP1 PE=2 SV=1 - [Q9V438_DROME]	7.01633	7.16	1	3	3	4	1.25251e+06	433	46.7227	5.69385
Q9Y0Y2	Adenylosuccinate synthetase OS=Drosophila melanogaster GN=AdSS PE=2 SV=1 - [PURA_DROME]	6.99595	3.13	1	1	1	2	259485	447	48.8703	6.84424
Q9VWG3	40S ribosomal protein S10b OS=Drosophila melanogaster GN=RpS10b PE=1 SV=2 - [RS10B_DROME]	6.99194	14.37	2	2	2	4	1.53128e+06	160	17.8673	9.80322
Q9Y0Y5	BcDNA.LD29885 OS=Drosophila melanogaster GN=epsilonCOP PE=2 SV=1 - [Q9Y0Y5_DROME]	6.99187	10.78	1	3	3	4	1.32512e+06	306	34.5974	4.86865
Q9VRL1	LD28904p OS=Drosophila melanogaster GN=Uev1A PE=2 SV=1 - [Q9VRL1_DROME]	6.97289	6.9	1	1	1	3	2.44372e+06	145	16.6583	6.13818
Q9VZS5	60S ribosomal protein L28 OS=Drosophila melanogaster GN=RpL28 PE=1 SV=1 - [RL28_DROME]	6.9435	17.36	1	2	2	3	2.70654e+06	144	16.0191	11.0923
A5XCL5	LD36265p (Fragment) OS=Drosophila melanogaster GN=UGP PE=2 SV=1 - [A5XCL5_DROME]	6.9276	7.24	4	3	3	5	835882	511	57.7881	7.40088
Q9VRJ9	Ubiquitin thioesterase OTU1 OS=Drosophila melanogaster GN=CG4603 PE=2 SV=1 - [OTU1_DROME]	6.92385	6.05	2	1	1	2	1.86445e+06	347	37.799	4.81787
Q9VWT1	GH22474p OS=Drosophila melanogaster GN=Aats-his PE=2 SV=1 - [Q9VWT1_DROME]	6.82414	4.98	3	3	3	3	831464	522	57.7102	6.94678
Q9VL18-2	Isoform A of Probable elongation factor 1-delta OS=Drosophila melanogaster GN=eEF1delta - [EF1D_DROME]	6.81539	16.16	2	3	3	3	5.50564e+06	229	25.8284	4.7417
O44437	Small nuclear ribonucleoprotein Sm D3 OS=Drosophila melanogaster GN=SmD3 PE=1 SV=1 - [SMD3_DROME]	6.81363	12.58	1	2	2	3	2.54092e+06	151	15.5721	10.5356
Q8IPG9	Basigin, isoform A OS=Drosophila melanogaster GN=Bsg PE=2 SV=1 - [Q8IPG9_DROME]	6.79782	8.3	3	2	2	3	1.68708e+06	265	29.207	5.18604
P48603	F-actin-capping protein subunit beta OS=Drosophila melanogaster GN=cpb PE=2 SV=1 - [CAPZB_DROME]	6.77142	8.7	1	2	2	3	480487	276	31.3435	5.43994
Q24319	Dolichyl-diphosphooligosaccharide--protein glycosyltransferase 48 kDa subunit OS=Drosophila melanogaster GN=Ost48 PE=2 SV=2 - [OST48_DROME]	6.76827	6.46	1	3	3	4	381739	449	49.9495	5.59229
Q0E914	Smooth, isoform G OS=Drosophila melanogaster GN=sm PE=4 SV=1 - [Q0E914_DROME]	6.7635	6.54	5	1	1	3	1.76393e+06	260	28.4635	8.80713
A1Z877	LP19846p OS=Drosophila melanogaster GN=Ndg PE=2 SV=1 - [A1Z877_DROME]	6.73199	1.41	2	2	2	4	593373	1350	148.986	4.58936
Q9VTY2	CG10638, isoform A OS=Drosophila melanogaster GN=CG10638 PE=4 SV=1 - [Q9VTY2_DROME]	6.70225	4.42	1	1	1	2	537929	317	35.7735	6.11279
P48602	V-type proton ATPase catalytic subunit A isoform 1 OS=Drosophila melanogaster GN=Vha68-1 PE=2 SV=2 - [VATA1_DROME]	6.65872	1.95	2	1	1	2	232312	614	68.3323	5.2876
Q9W1I7	CG5554 OS=Drosophila melanogaster GN=CG5554 PE=2 SV=1 - [Q9W1I7_DROME]	6.62103	6.81	1	2	2	3	964678	323	36.3217	4.58936
P25161	Probable 26S proteasome non-ATPase regulatory subunit 3 OS=Drosophila melanogaster GN=Rpn3 PE=2 SV=1 - [PSMD3_DROME]	6.61334	4.45	1	2	2	3	478451	494	55.9696	8.99756
Q9VTP4	60S ribosomal protein L10a-2 OS=Drosophila melanogaster GN=RpL10Ab PE=1 SV=2 - [R10AB_DROME]	6.59983	10.14	1	2	2	4	3.06911e+06	217	24.2581	9.86182
P08645	Ras-like protein 3 OS=Drosophila melanogaster GN=R PE=2 SV=2 - [RAS3_DROME]	6.59948	11.41	1	2	2	3	1.85826e+06	184	20.8497	6.68311
Q7JV69	SD11922p OS=Drosophila melanogaster GN=Spn55B PE=2 SV=1 - [Q7JV69_DROME]	6.55551	4.01	1	1	1	2	1.90833e+06	374	42.1214	5.30029
A1Z8U9	Ribosomal protein S11, isoform B OS=Drosophila melanogaster GN=RpS11 PE=3 SV=1 - [A1Z8U9_DROME]	6.52237	16.23	2	2	2	4	597016	154	18.0909	11.1216
Q9VAC1	CG7920, isoform A OS=Drosophila melanogaster GN=CG7920 PE=2 SV=1 - [Q9VAC1_DROME]	6.47389	3.98	1	2	2	3	870769	477	51.8216	8.11865
O18373	Selenide, water dikinase OS=Drosophila melanogaster GN=SelD PE=1 SV=1 - [SPS1_DROME]	6.41134	5.53	1	2	2	3	474526	398	43.4182	6.93213
Q9VEJ0	Peroxiredoxin 5037 OS=Drosophila melanogaster GN=Prx3 PE=2 SV=2 - [Q9VEJ0_DROME]	6.41023	10.68	1	2	2	2	639985	234	26.3628	7.48877
Q9VLY9	Thioester-containing protein 2, isoform B OS=Drosophila melanogaster GN=Tep2 PE=4 SV=2 - [Q9VLY9_DROME]	6.37311	1.64	5	2	2	4	358211	1399	155.687	6.354
P15348	DNA topoisomerase 2 OS=Drosophila melanogaster GN=Top2 PE=1 SV=1 - [TOP2_DROME]	6.3663	1.73	1	2	2	2	218674	1447	164.293	8.22119
P48588	40S ribosomal protein S25 OS=Drosophila melanogaster GN=RpS25 PE=1 SV=3 - [RS25_DROME]	6.34048	27.35	1	3	3	4	5.72328e+06	117	13.1934	10.272
P02299	Histone H3 OS=Drosophila melanogaster GN=His3 PE=1 SV=4 - [H3_DROME]	6.23903	11.76	2	2	2	5	1.44873e+07	136	15.3785	11.2681
P11046	Laminin subunit beta-1 OS=Drosophila melanogaster GN=LanB1 PE=1 SV=4 - [LAMB1_DROME]	6.17324	1.4	1	3	3	3	775666	1788	198.205	5.32568
Q9VGS2	Translationally-controlled tumor protein homolog OS=Drosophila melanogaster GN=Tctp PE=1 SV=1 - [TCTP_DROME]	6.16907	12.21	1	2	2	2	3.11742e+06	172	19.6246	4.80518
Q9V429-2	Isoform Short of Thioredoxin-2 OS=Drosophila melanogaster GN=Trx-2 - [THIO2_DROME]	6.14638	10.38	1	2	2	3	1.17538e+06	106	11.729	4.88135
M9PE30	Chd64, isoform C OS=Drosophila melanogaster GN=Chd64 PE=4 SV=1 - [M9PE30_DROME]	6.12801	6.29	2	1	1	2	1.20564e+06	175	19.3937	7.75244
Q9VIM0	CG2493, isoform A OS=Drosophila melanogaster GN=CG2493 PE=2 SV=1 - [Q9VIM0_DROME]	6.10771	6.95	1	3	3	6	1.0806e+06	475	53.6676	5.70654
Q7JVK1	HL07956p OS=Drosophila melanogaster GN=mRpL18 PE=2 SV=1 - [Q7JVK1_DROME]	6.09594	6.45	1	1	1	2		186	21.1629	9.29053
Q7KMQ0	26S proteasome regulatory complex subunit p48B OS=Drosophila melanogaster GN=Rpt1 PE=2 SV=1 - [Q7KMQ0_DROME]	5.9058	5.77	1	2	2	2	290390	433	48.511	6.03662
Q9Y112	BcDNA.GH10614 OS=Drosophila melanogaster GN=BcDNA.GH10614 PE=2 SV=1 - [Q9Y112_DROME]	5.89397	11.71	1	3	3	3	620654	316	36.2894	7.07861
Q9VII7	Serpin 38F OS=Drosophila melanogaster GN=Spn38F PE=3 SV=3 - [Q9VII7_DROME]	5.86042	2.96	1	1	1	2	227363	372	41.6608	8.25049
P48601	26S protease regulatory subunit 4 OS=Drosophila melanogaster GN=Rpt2 PE=1 SV=2 - [PRS4_DROME]	5.65659	7.52	1	2	2	3	2.4391e+06	439	49.2927	6.58057
Q9VRP2	CG10576 OS=Drosophila melanogaster GN=CG10576 PE=4 SV=1 - [Q9VRP2_DROME]	5.63694	7.93	1	2	2	2	830757	391	42.7462	7.10791
Q9W5B4	CG14629 OS=Drosophila melanogaster GN=EG:103E12.2 PE=2 SV=1 - [Q9W5B4_DROME]	5.62851	7.84	1	2	2	2	631465	319	35.0097	5.37646
O18413	26S protease regulatory subunit 8 OS=Drosophila melanogaster GN=Rpt6 PE=1 SV=2 - [PRS8_DROME]	5.58781	5.93	1	2	2	2	437769	405	45.8282	8.41162
Q9VUZ0	BcDNA.LD10457 OS=Drosophila melanogaster GN=SsRbeta PE=2 SV=2 - [Q9VUZ0_DROME]	5.53002	6.84	1	1	1	2	1.75129e+06	190	21.193	8.71924
Q8MS31	CG34415, isoform D OS=Drosophila melanogaster GN=mute PE=2 SV=1 - [Q8MS31_DROME]	5.51962	1.35	2	1	1	6	2.41598e+08	665	74.4151	6.55127
Q2PDY3	CG7255, isoform F OS=Drosophila melanogaster GN=CG7255 PE=4 SV=1 - [Q2PDY3_DROME]	5.45919	0.75	1	1	1	3	4.08428e+06	1063	117.224	5.42725
Q7KUA4	LD22577p OS=Drosophila melanogaster GN=Uba2 PE=2 SV=1 - [Q7KUA4_DROME]	5.44694	2.43	1	1	1	2	769451	700	77.5627	5.021
Q9VCZ8	Probable prefoldin subunit 5 OS=Drosophila melanogaster GN=CG7048 PE=2 SV=1 - [PFD5_DROME]	5.44154	6.55	1	1	1	2	289143	168	19.0657	7.32764
E1JIL4	Chromatin assembly factor 1 subunit, isoform B OS=Drosophila melanogaster GN=Caf1 PE=2 SV=1 - [E1JIL4_DROME]	5.39464	4.9	2	2	2	2	544172	429	48.5335	4.89404
Q7KLX3	GM12291p OS=Drosophila melanogaster GN=Tapdelta PE=2 SV=1 - [Q7KLX3_DROME]	5.3885	12.65	1	2	2	2	576919	166	17.59	8.54346
O17445	60S ribosomal protein L15 OS=Drosophila melanogaster GN=RpL15 PE=1 SV=1 - [RL15_DROME]	5.34198	19.12	1	4	4	4	1.35861e+06	204	24.3102	11.4731
Q9W2K2	IP04848p OS=Drosophila melanogaster GN=LSm1 PE=2 SV=1 - [Q9W2K2_DROME]	5.29599	8.76	1	1	1	2	307341	137	15.7454	5.42725
Q7K110	CG6370 OS=Drosophila melanogaster GN=OstDelta PE=2 SV=1 - [Q7K110_DROME]	5.11124	3.31	1	2	2	2	391889	634	69.187	9.17334
P55035	26S proteasome non-ATPase regulatory subunit 4 OS=Drosophila melanogaster GN=Rpn10 PE=1 SV=2 - [PSMD4_DROME]	5.09224	7.07	1	2	2	2	990924	396	42.5921	4.83057
P48591	Ribonucleoside-diphosphate reductase large subunit OS=Drosophila melanogaster GN=RnrL PE=1 SV=2 - [RIR1_DROME]	5.07032	6.4	1	4	4	5	1.23513e+06	812	91.9191	7.45947
Q8T3U2	40S ribosomal protein S23 OS=Drosophila melanogaster GN=RpS23 PE=1 SV=1 - [RS23_DROME]	5.06739	12.59	1	2	2	2	3.42433e+06	143	16.0068	10.5942
M9PIS3	6-phosphogluconate dehydrogenase, decarboxylating OS=Drosophila melanogaster GN=Pgd PE=3 SV=1 - [M9PIS3_DROME]	5.05115	2.08	2	1	1	2	869892	481	52.4575	6.31592
P19109-3	Isoform D of ATP-dependent RNA helicase p62 OS=Drosophila melanogaster GN=Rm62 - [DDX17_DROME]	4.98645	3.48	4	1	1	3		575	62.4355	9.56885
Q9W125	CG3683 protein OS=Drosophila melanogaster GN=NDUFA8 PE=2 SV=1 - [Q9W125_DROME]	4.97535	6.29	1	1	1	2	405576	175	19.8326	6.87354
Q03427	Lamin-C OS=Drosophila melanogaster GN=LamC PE=1 SV=2 - [LAMC_DROME]	4.90517	3.86	1	2	2	2	308399	621	69.8177	6.84424
P46223	60S ribosomal protein L7a OS=Drosophila melanogaster GN=RpL7A PE=1 SV=2 - [RL7A_DROME]	4.85622	8.49	1	2	2	3	1.29642e+06	271	30.7127	10.7114
A1ZB82	CG5174, isoform K OS=Drosophila melanogaster GN=CG5174 PE=4 SV=1 - [A1ZB82_DROME]	4.78943	9.09	8	1	1	2		99	10.9826	5.09717
Q8T0J5	CG7675, isoform A OS=Drosophila melanogaster GN=CG7675 PE=2 SV=1 - [Q8T0J5_DROME]	4.78071	3.48	2	1	1	2	365543	287	31.4298	9.31982
A1ZBB4	CG30122, isoform B OS=Drosophila melanogaster GN=CG30122 PE=4 SV=1 - [A1ZBB4_DROME]	4.75146	2.36	3	2	2	2	1.42621e+06	1271	140.41	5.0083
Q7K2L7	CG17765 OS=Drosophila melanogaster GN=CG17765 PE=1 SV=1 - [Q7K2L7_DROME]	4.68414	5.53	1	1	1	2	484575	199	22.4767	4.85596
O16797-4	Isoform B of 60S ribosomal protein L3 OS=Drosophila melanogaster GN=RpL3 - [RL3_DROME]	4.68077	6.7	4	2	2	2	1.16864e+06	403	45.4073	10.1841
Q9VT61	CG8108, isoform A OS=Drosophila melanogaster GN=CG8108 PE=2 SV=1 - [Q9VT61_DROME]	4.66139	2.39	1	2	2	3	419781	919	102.887	6.21436
Q7JWF1	CG12140 OS=Drosophila melanogaster GN=Etf-QO PE=2 SV=1 - [Q7JWF1_DROME]	4.65629	4.47	1	2	2	2	341952	604	65.9462	6.63916
Q9VIH1	CG9273 protein OS=Drosophila melanogaster GN=RPA2 PE=1 SV=2 - [Q9VIH1_DROME]	4.63204	13.41	1	3	3	3	930061	246	26.394	5.08447
Q9V3W0	GM01181p OS=Drosophila melanogaster GN=UK114 PE=2 SV=1 - [Q9V3W0_DROME]	4.61662	17.39	1	2	2	2	1.81906e+06	138	14.8668	7.81104
Q9VW56	Probable prefoldin subunit 6 OS=Drosophila melanogaster GN=CG7770 PE=2 SV=1 - [PFD6_DROME]	4.58077	8.8	1	1	1	2	449656	125	14.4184	8.51416
Q9V3V9	Endonuclease G inhibitor, isoform A OS=Drosophila melanogaster GN=EndoGI PE=1 SV=1 - [Q9V3V9_DROME]	4.56328	8.08	1	2	2	2	425207	359	40.5889	4.60205
Q9VI10	Probable small nuclear ribonucleoprotein Sm D2 OS=Drosophila melanogaster GN=SmD2 PE=1 SV=1 - [SMD2_DROME]	4.55846	15.97	1	2	2	2	987314	119	13.4953	9.94971
P46222	60S ribosomal protein L11 OS=Drosophila melanogaster GN=RpL11 PE=1 SV=2 - [RL11_DROME]	4.53744	7.61	1	1	1	1	4.97639e+06	184	21.0992	10.0229
Q9VRD9	Cystathionine beta-synthase, isoform A OS=Drosophila melanogaster GN=Cbs PE=1 SV=1 - [Q9VRD9_DROME]	4.50125	4.79	1	2	2	2	381223	522	56.8463	7.06396
Q6NL75	Ecdysone-inducible gene L1, isoform C OS=Drosophila melanogaster GN=ImpL1 PE=2 SV=1 - [Q6NL75_DROME]	4.4894	3.82	3	1	1	2	941105	340	38.2123	8.00146
P02517	Heat shock protein 26 OS=Drosophila melanogaster GN=Hsp26 PE=1 SV=2 - [HSP26_DROME]	4.48204	10.1	1	2	2	2	1.29956e+06	208	22.9798	7.56201
Q7K3J0	CG8258 OS=Drosophila melanogaster GN=CG8258 PE=2 SV=1 - [Q7K3J0_DROME]	4.46518	2.01	1	1	1	2	601322	546	59.3956	5.31299
Q4V4H7	CG13323 OS=Drosophila melanogaster GN=CG13323 PE=4 SV=1 - [Q4V4H7_DROME]	4.45321	8.04	1	1	1	2	445631	112	12.5214	9.99365
Q9V3I2	Drab5 OS=Drosophila melanogaster GN=Rab5 PE=2 SV=1 - [Q9V3I2_DROME]	4.43137	5.02	1	1	1	2	818619	219	23.944	8.41162
Q9VF40	CG5614 OS=Drosophila melanogaster GN=CG5614 PE=2 SV=1 - [Q9VF40_DROME]	4.39812	3.35	1	1	1	2	1.00582e+06	358	41.0663	6.29053
P36241	60S ribosomal protein L19 OS=Drosophila melanogaster GN=RpL19 PE=1 SV=2 - [RL19_DROME]	4.3751	12.81	1	3	3	3	1.4825e+06	203	23.9834	11.0044
Q9W335	LD26546p OS=Drosophila melanogaster GN=l(1)G0320 PE=2 SV=1 - [Q9W335_DROME]	4.34704	4.97	1	1	1	1	87334.9	302	33.0097	4.84326
Q9VKM8	CG33129, isoform A OS=Drosophila melanogaster GN=CG33129 PE=2 SV=1 - [Q9VKM8_DROME]	4.32823	7.59	2	1	1	1	966449	237	25.7816	9.74463
Q9VAQ9	Strictosidine synthase-like 2 OS=Drosophila melanogaster GN=Ssl2 PE=4 SV=1 - [Q9VAQ9_DROME]	4.30921	2.92	1	1	1	2	1.08077e+08	411	45.9221	6.94678
O01666	ATP synthase subunit gamma, mitochondrial OS=Drosophila melanogaster GN=ATPsyn-gamma PE=2 SV=2 - [ATPG_DROME]	4.27422	8.75	1	2	2	2	674865	297	32.8501	9.21729
Q7K1Q6	CG42351, isoform B OS=Drosophila melanogaster GN=Jabba PE=2 SV=1 - [Q7K1Q6_DROME]	4.26164	7.81	4	3	3	3	2.37981e+06	320	35.9397	5.2876
A8DY87	cAMP-dependent protein kinase R2, isoform D OS=Drosophila melanogaster GN=Pka-R2 PE=4 SV=1 - [A8DY87_DROME]	4.25737	3.22	4	1	1	2	561898	373	42.3992	4.91943
B7Z005	Drongo, isoform I OS=Drosophila melanogaster GN=drongo PE=4 SV=2 - [B7Z005_DROME]	4.2524	1.95	3	1	1	2	5.34297e+08	514	55.2616	7.97217
Q9W4K0	CHOp24 OS=Drosophila melanogaster GN=CHOp24 PE=2 SV=1 - [Q9W4K0_DROME]	4.22104	5.29	1	1	1	2	1.70729e+06	208	23.2487	5.75732
Q95RN0-2	Isoform B of UPF0528 protein CG10038 OS=Drosophila melanogaster GN=CG10038 - [U528_DROME]	4.20688	3.24	2	1	1	2	800020	309	34.4515	7.50342
Q9VMU4	60S ribosomal protein L37a OS=Drosophila melanogaster GN=RpL37A PE=1 SV=3 - [RL37A_DROME]	4.16093	29.35	1	2	2	2	1.88693e+06	92	10.3044	10.6089
Q9V9Q4	CG1416, isoform A OS=Drosophila melanogaster GN=CG1416 PE=2 SV=2 - [Q9V9Q4_DROME]	4.09694	3.95	1	1	1	1	491333	354	40.1291	6.56592
Q9V3U2	H/ACA ribonucleoprotein complex subunit 2-like protein OS=Drosophila melanogaster GN=NHP2 PE=1 SV=1 - [NHP2_DROME]	4.08904	5	1	1	1	2	335127	160	17.7122	8.104
Q94519-2	Isoform 1 of Acyl carrier protein, mitochondrial OS=Drosophila melanogaster GN=mtacp1 - [ACPM_DROME]	4.07538	13.29	3	2	2	3	2.33317e+06	143	15.9922	5.90967
Q9Y1T2	Adenomatous polyposis coli 2 OS=Drosophila melanogaster GN=Apc2 PE=2 SV=1 - [Q9Y1T2_DROME]	4.07404	1.69	1	1	1	2	421072	1067	116.631	5.87158
Q9VTF9	Ubiquitin fusion degradation protein 1 homolog OS=Drosophila melanogaster GN=Ufd1-like PE=2 SV=1 - [UFD1_DROME]	4.07048	7.91	1	2	2	2	257030	316	34.7694	6.25244
A1ZBJ2	CG7461 OS=Drosophila melanogaster GN=CG7461 PE=3 SV=2 - [A1ZBJ2_DROME]	4.0474	1.59	1	1	1	2	1.2277e+06	627	68.325	7.76709
Q7K1H9	CG10912 OS=Drosophila melanogaster GN=CG10912 PE=2 SV=1 - [Q7K1H9_DROME]	4.02052	3.69	1	1	1	3	613834	271	29.6739	4.81787
Q9VZQ8	Glutathione peroxidase OS=Drosophila melanogaster GN=PHGPx PE=2 SV=1 - [Q9VZQ8_DROME]	4.00226	6.51	3	1	1	2	1.99039e+06	169	18.6645	7.82568
Q9VZ69	IGF-II mRNA-binding protein OS=Drosophila melanogaster GN=Imp PE=2 SV=2 - [Q9VZ69_DROME]	3.98309	2.83	5	1	1	1	302141	566	62.0905	9.61279
Q9VFT4	AT27578p OS=Drosophila melanogaster GN=rin PE=1 SV=1 - [Q9VFT4_DROME]	3.96576	4.49	1	4	4	5	3.46085e+06	690	74.898	7.37158
Q9V3V2	Fkbp13, isoform A OS=Drosophila melanogaster GN=Fkbp14 PE=2 SV=1 - [Q9V3V2_DROME]	3.96501	6.94	1	1	1	1	778383	216	23.945	4.86865
P29845	Heat shock 70 kDa protein cognate 5 OS=Drosophila melanogaster GN=Hsc70-5 PE=1 SV=2 - [HSP7E_DROME]	3.95899	4.81	1	2	3	3	3.56771e+06	686	74.0202	6.354
Q9VN93-2	Isoform B of Putative cysteine proteinase CG12163 OS=Drosophila melanogaster GN=CG12163 - [CPR1_DROME]	3.9316	2.95	2	1	1	1	368304	475	53.5117	8.04541
Q7JZN0	FI02994p OS=Drosophila melanogaster GN=Sec61beta PE=4 SV=1 - [Q7JZN0_DROME]	3.92593	10	1	1	1	2	878557	100	10.2393	11.6489
E1NZB4	Found in neurons, isoform D (Fragment) OS=Drosophila melanogaster GN=fne PE=2 SV=1 - [E1NZB4_DROME]	3.9127	5.1	7	2	2	2	406940	353	38.0116	9.14404
P41126	60S ribosomal protein L13 OS=Drosophila melanogaster GN=RpL13 PE=1 SV=1 - [RL13_DROME]	3.86976	11.47	1	3	3	5	2.48308e+06	218	24.9358	10.9897
Q9VD02	CG7054 OS=Drosophila melanogaster GN=CG7054 PE=1 SV=1 - [Q9VD02_DROME]	3.8449	24.58	1	4	4	4	649104	179	19.81	5.21143
A1Z8D0	CG6751 OS=Drosophila melanogaster GN=nclb PE=4 SV=1 - [A1Z8D0_DROME]	3.81735	2.18	1	1	1	2	986429	459	51.3591	4.38623
Q7KVX5	Vap-33-1, isoform A OS=Drosophila melanogaster GN=Vap-33A PE=4 SV=1 - [Q7KVX5_DROME]	3.80237	11.06	3	2	2	3	980674	235	26.7543	8.38232
Q9V3W7	LD40489p OS=Drosophila melanogaster GN=SF2 PE=2 SV=1 - [Q9V3W7_DROME]	3.79505	6.67	1	3	3	3	938206	255	28.3328	9.90576
A1ZAH8	Ribosomal protein S15, isoform B OS=Drosophila melanogaster GN=RpS15 PE=2 SV=1 - [A1ZAH8_DROME]	3.76246	8.16	2	1	1	2	1.52625e+06	147	16.9682	10.3306
Q9VTE5	Probable prefoldin subunit 2 OS=Drosophila melanogaster GN=l(3)01239 PE=2 SV=1 - [PFD2_DROME]	3.74813	6.99	1	1	1	2	842455	143	16.1933	5.64307
Q9W2M4	CG10527 OS=Drosophila melanogaster GN=CG10527 PE=4 SV=1 - [Q9W2M4_DROME]	3.67707	6.76	1	1	1	1	3.37808e+06	296	31.5364	4.76709
M9PD73	Thioester-containing protein 4, isoform B OS=Drosophila melanogaster GN=Tep4 PE=4 SV=1 - [M9PD73_DROME]	3.62905	0.75	4	1	1	2		1476	166.266	5.66846
Q9VK00	CG16826 OS=Drosophila melanogaster GN=CG16826 PE=4 SV=1 - [Q9VK00_DROME]	3.59356	5.87	1	2	2	2	716379	341	37.781	4.77979
Q9VGK3	Peptidyl-prolyl cis-trans isomerase OS=Drosophila melanogaster GN=CG14715 PE=2 SV=1 - [Q9VGK3_DROME]	3.54698	10.87	1	1	1	1	202671	138	14.7747	8.5874
Q7JQH9	LD31742p OS=Drosophila melanogaster GN=whd PE=2 SV=1 - [Q7JQH9_DROME]	3.43568	1.67	2	1	1	1	380066	780	89.3561	8.45557
Q9W401	Probable citrate synthase, mitochondrial OS=Drosophila melanogaster GN=kdn PE=2 SV=1 - [CISY_DROME]	3.41319	5.6	2	2	2	2	590425	464	51.5416	8.80713
Q7KB18	FI02870p OS=Drosophila melanogaster GN=Jheh2 PE=2 SV=1 - [Q7KB18_DROME]	3.4094	3.24	1	1	1	1	121959	463	51.9724	7.6792
Q9V3V6	26S proteasome regulatory complex subunit p50 OS=Drosophila melanogaster GN=Rpt5 PE=2 SV=1 - [Q9V3V6_DROME]	3.40393	3.5	1	1	1	1	324330	428	47.7767	5.33838
B7Z0X1	Serine hydroxymethyltransferase OS=Drosophila melanogaster GN=CG3011 PE=3 SV=1 - [B7Z0X1_DROME]	3.37669	1.5	2	1	1	2	482316	467	50.9524	7.72314
Q95SI7	CG6028 OS=Drosophila melanogaster GN=CG6028 PE=2 SV=1 - [Q95SI7_DROME]	3.19667	4.78	1	1	1	1	190407	293	32.2729	6.56592
Q7K221	Glutamate oxaloacetate transaminase 1, isoform A OS=Drosophila melanogaster GN=Got1 PE=2 SV=1 - [Q7K221_DROME]	3.12708	3.37	2	1	1	1	551737	416	46.0583	7.53271
Q8IQX5	CG6891, isoform B OS=Drosophila melanogaster GN=CG6891 PE=4 SV=1 - [Q8IQX5_DROME]	3.11696	8.22	2	1	1	1	140859	146	16.5943	5.0083
O76511	Thymidylate synthase OS=Drosophila melanogaster GN=Ts PE=1 SV=2 - [TYSY_DROME]	3.10905	4.05	1	1	1	1	165973	321	36.6333	6.60986
Q9VSC5	CG8209 OS=Drosophila melanogaster GN=CG8209 PE=2 SV=1 - [Q9VSC5_DROME]	3.03993	4.23	1	1	1	1	185336	331	36.7098	6.1001
Q9W0C7	Protein OPI10 homolog OS=Drosophila melanogaster GN=CG13926 PE=3 SV=1 - [OPI10_DROME]	3.03261	6.6	1	1	1	1	223008	197	21.8461	6.15088
M9PI13	CG11714, isoform C OS=Drosophila melanogaster GN=CG11714 PE=4 SV=1 - [M9PI13_DROME]	3.00995	2.96	2	1	1	1	1.91423e+07	371	42.5147	5.43994
P17133	U1 small nuclear ribonucleoprotein 70 kDa OS=Drosophila melanogaster GN=snRNP-U1-70K PE=1 SV=2 - [RU17_DROME]	3.00744	2.46	1	1	1	1	534101	448	52.8691	10.0376
A1Z9C2	CG17050 OS=Drosophila melanogaster GN=CG17050 PE=4 SV=1 - [A1Z9C2_DROME]	2.98956	3.56	1	1	1	1		506	58.8821	9.24658
P25867	Ubiquitin-conjugating enzyme E2-17 kDa OS=Drosophila melanogaster GN=eff PE=2 SV=1 - [UBCD1_DROME]	2.91252	16.33	1	3	3	3	6.99266e+06	147	16.6674	7.29834
Q9VEA1	Eukaryotic initiation factor 1A, isoform A OS=Drosophila melanogaster GN=eIF-1A PE=2 SV=1 - [Q9VEA1_DROME]	2.90193	14.19	1	2	2	2	3.38017e+06	148	17.0856	5.22412
A1ZAU2	CG18431 OS=Drosophila melanogaster GN=CG18431-RA PE=2 SV=1 - [A1ZAU2_DROME]	2.89965	6.19	1	1	1	1	626379	194	21.6494	5.94775
P34082-3	Isoform 3 of Fasciclin-2 OS=Drosophila melanogaster GN=Fas2 - [FAS2_DROME]	2.88019	1.55	5	1	1	1	877980	773	86.2356	5.92236
O18332	FI01544p OS=Drosophila melanogaster GN=Rab1 PE=2 SV=1 - [O18332_DROME]	2.87919	9.27	19	1	2	2	1.87556e+06	205	22.7484	5.46533
Q10714	Angiotensin-converting enzyme OS=Drosophila melanogaster GN=Ance PE=1 SV=3 - [ACE_DROME]	2.85186	1.79	1	1	1	1	282020	615	70.8692	5.14795
A1Z6G3	CG17510, isoform D OS=Drosophila melanogaster GN=Fis1 PE=4 SV=1 - [A1Z6G3_DROME]	2.83835	13.04	4	1	1	1	1.38505e+06	92	10.2484	8.11865
Q7JVZ8	CG5224 OS=Drosophila melanogaster GN=GstE11 PE=2 SV=1 - [Q7JVZ8_DROME]	2.81776	8	1	1	1	1	162930	225	25.078	5.87158
P49630	60S ribosomal protein L36 OS=Drosophila melanogaster GN=RpL36 PE=1 SV=1 - [RL36_DROME]	2.78688	10.43	1	1	1	1	1.20845e+06	115	13.4937	11.3706
Q9VRP3	AT08565p OS=Drosophila melanogaster GN=Txl PE=2 SV=1 - [Q9VRP3_DROME]	2.77102	3.83	1	1	1	2	2.92536e+06	287	31.7079	5.8335
Q9VLT3	LD23292p OS=Drosophila melanogaster GN=Mcr PE=2 SV=1 - [Q9VLT3_DROME]	2.77014	0.68	1	1	1	1	383975	1760	202.655	6.46826
Q8SXY6	Transmembrane emp24 domain-containing protein bai OS=Drosophila melanogaster GN=bai PE=2 SV=1 - [TMEDA_DROME]	2.75721	5.34	1	1	1	1	1.55798e+06	206	23.6762	8.22119
P46150-5	Isoform C of Moesin/ezrin/radixin homolog 1 OS=Drosophila melanogaster GN=Moe - [MOEH_DROME]	2.74308	2.34	7	1	1	1	244079	512	60.5608	5.79541
P18824-2	Isoform Neural of Armadillo segment polarity protein OS=Drosophila melanogaster GN=arm - [ARM_DROME]	2.74065	1.39	2	1	1	1	928456	721	79.2638	6.354
B7Z0L1	Fasciclin 1, isoform E OS=Drosophila melanogaster GN=Fas1 PE=4 SV=1 - [B7Z0L1_DROME]	2.72228	1.6	6	1	1	1	513952	624	69.4437	6.91748
Q07171-2	Isoform 2 of Gelsolin OS=Drosophila melanogaster GN=Gel - [GELS_DROME]	2.72044	1.49	3	1	1	1	312683	740	82.4769	5.03369
P49028	Protein mago nashi OS=Drosophila melanogaster GN=mago PE=1 SV=1 - [MGN_DROME]	2.68763	9.52	1	1	1	2	420731	147	17.2997	6.11279
Q9U915	Adenylate kinase OS=Drosophila melanogaster GN=Adk2 PE=1 SV=1 - [KAD2_DROME]	2.66301	5.83	1	1	1	1	133047	240	26.5259	7.88428
A1Z6X6	CG1707 OS=Drosophila melanogaster GN=CG1707 PE=4 SV=1 - [A1Z6X6_DROME]	2.65308	17.61	1	3	3	3	2.32166e+06	176	20.0329	6.55127
Q9VHN6	39S ribosomal protein L19, mitochondrial OS=Drosophila melanogaster GN=mRpL19 PE=2 SV=1 - [RM19_DROME]	2.62363	2.94	1	1	1	1		306	36.17	8.82178
Q9W141	Putative ATP synthase subunit f, mitochondrial OS=Drosophila melanogaster GN=CG4692 PE=1 SV=1 - [ATPK_DROME]	2.61912	10.28	2	1	1	1	1.84116e+06	107	12.4754	10.0962
A1Z8J5	Shavenoid, isoform A OS=Drosophila melanogaster GN=sha PE=4 SV=1 - [A1Z8J5_DROME]	2.60887	1.41	2	1	1	1	224174	1626	179.201	7.35693
Q9VCE3	Rox8, isoform B OS=Drosophila melanogaster GN=Rox8 PE=4 SV=1 - [Q9VCE3_DROME]	2.59772	2.59	2	1	1	1	404486	464	49.5291	7.85498
Q9VRJ1	Alanine--tRNA ligase, mitochondrial OS=Drosophila melanogaster GN=Aats-ala-m PE=2 SV=1 - [SYAM_DROME]	2.58166	2.87	1	1	1	1		1012	113.032	6.62451
Q9VFV9	DnaJ-like-2, isoform A OS=Drosophila melanogaster GN=Droj2 PE=2 SV=1 - [Q9VFV9_DROME]	2.58096	3.47	1	1	1	1	282402	403	45.2016	6.48096
M9MS77	CG42704 OS=Drosophila melanogaster GN=CG42704 PE=4 SV=1 - [M9MS77_DROME]	2.57425	7.56	1	1	1	1	2.27001e+06	119	13.0086	6.41748
Q7K738	EG:52C10.4 protein OS=Drosophila melanogaster GN=UbcD10 PE=2 SV=1 - [Q7K738_DROME]	2.56629	9.74	1	1	1	1	611789	154	17.8964	8.55811
Q9U3Z7	NHP2-like protein 1 homolog OS=Drosophila melanogaster GN=hoip PE=2 SV=1 - [NH2L1_DROME]	2.55836	9.45	1	1	1	1	719177	127	13.8744	7.09326
Q9VEH0	Aluminum tubes, isoform A OS=Drosophila melanogaster GN=alt PE=4 SV=1 - [Q9VEH0_DROME]	2.53882	2.02	2	1	1	1	100090	842	95.0376	7.09326
Q7K1Z5	Ubiquitin-fold modifier-conjugating enzyme 1 OS=Drosophila melanogaster GN=CG8386 PE=2 SV=1 - [UFC1_DROME]	2.51634	6.1	1	1	1	1	289780	164	18.9919	8.35303
O76454	Pterin-4-alpha-carbinolamine dehydratase OS=Drosophila melanogaster GN=Pcd PE=1 SV=2 - [PHS_DROME]	2.49858	14.58	1	2	2	2	181879	192	21.054	9.75928
Q9VYC9	CG34324 OS=Drosophila melanogaster GN=CG34324-RA PE=2 SV=3 - [Q9VYC9_DROME]	2.46908	4.49	1	1	1	1	323237	267	28.6296	7.89893
Q8MSI2	GH15296p OS=Drosophila melanogaster GN=Scp1 PE=2 SV=1 - [Q8MSI2_DROME]	2.45473	6.88	1	1	1	2	174725	189	21.6336	4.93213
Q7KTW5	CG9391, isoform A OS=Drosophila melanogaster GN=CG9391 PE=2 SV=1 - [Q7KTW5_DROME]	2.45278	5.04	1	1	1	1	316098	278	30.6065	5.93506
Q9VDG0	Dynein heavy chain at 93AB OS=Drosophila melanogaster GN=Dhc93AB PE=4 SV=3 - [Q9VDG0_DROME]	2.4478	0.53	1	1	1	1	724112	4486	513.673	5.49072
Q9VW34	FI03450p OS=Drosophila melanogaster GN=serp PE=2 SV=2 - [Q9VW34_DROME]	2.44468	2.4	1	1	1	1	320700	541	61.5692	5.09717
H9XVM9	CG1674, isoform L OS=Drosophila melanogaster GN=CG1674 PE=4 SV=1 - [H9XVM9_DROME]	2.42737	1.66	1	1	1	1		905	101.555	7.32764
P84029	Cytochrome c-2 OS=Drosophila melanogaster GN=Cyt-c-p PE=1 SV=2 - [CYC2_DROME]	2.41649	22.22	1	2	2	2	1.12365e+06	108	11.7271	9.56885
Q9VCX3	Probable 39S ribosomal protein L45, mitochondrial OS=Drosophila melanogaster GN=mRpL45 PE=2 SV=1 - [RM45_DROME]	2.39032	2.77	1	1	1	1	50411.8	361	41.5847	9.23193
Q9VZU7	Ubiquitin carboxyl-terminal hydrolase OS=Drosophila melanogaster GN=CG12082 PE=2 SV=1 - [Q9VZU7_DROME]	2.37984	1.09	1	1	1	1	1.85387e+06	827	92.0333	5.49072
Q9W2V9	LD40707p OS=Drosophila melanogaster GN=l(1)G0289 PE=2 SV=1 - [Q9W2V9_DROME]	2.37736	1.76	1	1	1	1	525421	625	67.2473	7.02002
Q9W3Y3	CG3226 OS=Drosophila melanogaster GN=CG3226 PE=2 SV=1 - [Q9W3Y3_DROME]	2.36087	11.74	1	2	2	3	440242	230	25.7673	6.96143
Q9VBA3	AT30002p OS=Drosophila melanogaster GN=sda PE=2 SV=2 - [Q9VBA3_DROME]	2.35701	1.49	2	1	1	1		1071	121.623	6.1001
Q08012	Protein enhancer of sevenless 2B OS=Drosophila melanogaster GN=drk PE=1 SV=1 - [DRK_DROME]	2.35376	5.69	1	1	1	1	343261	211	24.4201	5.36377
Q9V9M7	RE62581p OS=Drosophila melanogaster GN=RpL21 PE=1 SV=1 - [Q9V9M7_DROME]	2.35118	5.03	1	1	1	1	2.19462e+06	159	18.4642	10.5503
Q8IRB6	Beta-hexosaminidase OS=Drosophila melanogaster GN=Hexo1 PE=2 SV=1 - [Q8IRB6_DROME]	2.34394	2.97	2	2	2	2	673065	606	68.9652	5.73193
Q9VAD3	CG15523, isoform A OS=Drosophila melanogaster GN=CG15523 PE=4 SV=3 - [Q9VAD3_DROME]	2.34064	0.51	1	1	1	1	241143	3731	424.718	6.78564
Q9V8M5	Probable 3-hydroxyisobutyrate dehydrogenase, mitochondrial OS=Drosophila melanogaster GN=CG15093 PE=2 SV=2 - [3HIDH_DROME]	2.33465	5.56	1	1	1	1		324	33.861	8.1333
M9NDX0	Sallimus, isoform D OS=Drosophila melanogaster GN=sls PE=4 SV=1 - [M9NDX0_DROME]	2.32456	0.21	17	1	1	1	174779	4811	542.117	5.99854
P48810-2	Isoform B of Heterogeneous nuclear ribonucleoprotein 87F OS=Drosophila melanogaster GN=Hrb87F - [RB87F_DROME]	2.3173	2.77	6	1	1	1	771890	325	33.6501	8.74854
Q24133	DnaJ protein homolog 1 OS=Drosophila melanogaster GN=DnaJ-1 PE=1 SV=3 - [DNAJ1_DROME]	2.30109	2.99	1	1	1	1	259352	334	37.005	8.85107
M9PHG4	Beta spectrin, isoform C OS=Drosophila melanogaster GN=beta-Spec PE=4 SV=1 - [M9PHG4_DROME]	2.29483	1.02	3	1	1	2	410020	2147	249.411	5.22412
P53997	Protein SET OS=Drosophila melanogaster GN=Set PE=1 SV=2 - [SET_DROME]	2.2802	3.72	1	1	1	1	493684	269	30.9757	4.36084
Q7K130	CG12042 OS=Drosophila melanogaster GN=CG12042 PE=2 SV=1 - [Q7K130_DROME]	2.27812	2.14	1	1	1	1	2.93477e+06	514	57.8884	8.22119
M9NDZ8	CG43074 OS=Drosophila melanogaster GN=CG43074 PE=4 SV=1 - [M9NDZ8_DROME]	2.26635	4.4	1	1	1	1	692720	182	20.9336	5.03369
Q9W258	CG3624 OS=Drosophila melanogaster GN=babos PE=2 SV=2 - [Q9W258_DROME]	2.26205	6.12	1	1	1	2	500971	196	20.4542	4.70361
Q9VHA1	Spermidine synthase, isoform A OS=Drosophila melanogaster GN=SpdS PE=3 SV=1 - [Q9VHA1_DROME]	2.25269	4.88	1	1	1	1		287	32.3141	5.78271
Q8I0M2	CG4210, isoform B OS=Drosophila melanogaster GN=CG4210 PE=2 SV=1 - [Q8I0M2_DROME]	2.22264	5.63	2	1	1	1	648314	142	16.4722	5.64307
B7Z036	Uninflatable, isoform B OS=Drosophila melanogaster GN=uif PE=4 SV=1 - [B7Z036_DROME]	2.21207	0.45	3	1	1	1	607857	3557	386.881	5.30029
Q9VH77	Mannose-6-phosphate isomerase OS=Drosophila melanogaster GN=CG8417 PE=2 SV=1 - [Q9VH77_DROME]	2.2064	4.04	1	1	1	1	2.69952e+06	396	44.7458	4.98291
Q9W1H4	DNA ligase 1 OS=Drosophila melanogaster GN=DNA-ligI PE=1 SV=2 - [DNLI1_DROME]	2.19672	1.61	1	1	1	1	952651	747	84.6653	6.62451
Q8IN49	CG31195 OS=Drosophila melanogaster GN=CG31195-RA PE=2 SV=2 - [Q8IN49_DROME]	2.19008	2.6	1	2	2	3	340250	807	94.3055	7.44482
Q8I725	CG1236 OS=Drosophila melanogaster GN=CG1236 PE=3 SV=2 - [Q8I725_DROME]	2.18669	2.31	1	1	1	1	430461	347	38.3503	8.26514
Q9VLU7	CG7227, isoform A OS=Drosophila melanogaster GN=CG7227 PE=2 SV=1 - [Q9VLU7_DROME]	2.17147	3.09	1	1	1	1	587921	518	59.726	7.7085
Q9W475	CG3108 OS=Drosophila melanogaster GN=CG3108 PE=2 SV=2 - [Q9W475_DROME]	2.15285	1.06	1	1	1	1	670348	1132	125.259	4.28467
P98163-2	Isoform A of Putative vitellogenin receptor OS=Drosophila melanogaster GN=yl - [YL_DROME]	2.14166	0.88	2	1	1	1	282197	1937	214.827	6.22705
Q9VBM8	Palmitoyltransferase OS=Drosophila melanogaster GN=CG17198 PE=2 SV=3 - [Q9VBM8_DROME]	2.13801	3.68	1	1	1	1	1.56221e+06	299	34.4006	9.18799
P20432	Glutathione S-transferase 1-1 OS=Drosophila melanogaster GN=GstD1 PE=1 SV=1 - [GSTT1_DROME]	2.13758	4.31	1	1	1	1	453155	209	23.8511	7.2251
Q9VXI1	CG9914 OS=Drosophila melanogaster GN=CG9914 PE=2 SV=2 - [Q9VXI1_DROME]	2.13156	3.17	1	1	1	1	331981	315	34.7643	7.81104
Q24253	Beta adaptin OS=Drosophila melanogaster GN=AP-1-2beta PE=2 SV=1 - [Q24253_DROME]	2.09666	1.09	1	1	1	1	203708	921	101.115	5.10986
A1Z9G2	CG6197 OS=Drosophila melanogaster GN=CG6197-RA PE=2 SV=1 - [A1Z9G2_DROME]	2.09022	2.38	1	1	1	1	1.18411e+06	883	103.261	5.64307
P82890	Low molecular weight phosphotyrosine protein phosphatase 1 OS=Drosophila melanogaster GN=primo-1 PE=2 SV=1 - [PPAC1_DROME]	2.08805	5.81	1	1	1	1	482241	155	17.5449	7.26904
Q9VAJ4	General odorant-binding protein 99a OS=Drosophila melanogaster GN=Obp99a PE=1 SV=2 - [OB99A_DROME]	2.07081	5.63	1	1	1	1	4.63329e+06	142	15.9849	6.65381
Q9VAY9	GH07821p OS=Drosophila melanogaster GN=mRpS22 PE=2 SV=1 - [Q9VAY9_DROME]	2.06392	2.54	1	1	1	1	142154	393	45.7588	7.73779
Q9V434	Asparaginyl-tRNA synthetase, isoform A OS=Drosophila melanogaster GN=Aats-asn PE=2 SV=1 - [Q9V434_DROME]	2.06096	1.43	1	1	1	1	389358	558	63.8913	5.96045
A1A6Q4	CG34244, isoform A OS=Drosophila melanogaster GN=CG34244 PE=4 SV=1 - [A1A6Q4_DROME]	2.05949	15.18	1	1	1	1		112	12.658	5.89697
Q09332	UDP-glucose:glycoprotein glucosyltransferase OS=Drosophila melanogaster GN=Ugt PE=1 SV=2 - [UGGG_DROME]	2.05897	0.78	1	1	1	1	495417	1548	174.245	6.15088
Q9W1F7	CG2970 OS=Drosophila melanogaster GN=CG2970 PE=2 SV=2 - [Q9W1F7_DROME]	2.05737	4.1	1	1	1	1	182203	366	40.5061	8.83643
Q24524	Protein singed OS=Drosophila melanogaster GN=sn PE=3 SV=1 - [SING_DROME]	2.05172	2.15	1	1	1	1	727709	512	57.2436	7.00537
Q9VQT8	CG16712 OS=Drosophila melanogaster GN=CG16712 PE=4 SV=1 - [Q9VQT8_DROME]	2.04284	12.2	1	1	1	1		82	8.74523	5.92236
Q9W4X7	Eukaryotic translation initiation factor 3 subunit G-1 OS=Drosophila melanogaster GN=eIF3-S4-1 PE=1 SV=1 - [EI3G1_DROME]	2.02592	3.72	1	1	1	1	929298	269	29.9271	8.79248
Q9W5R8	60S ribosomal protein L5 OS=Drosophila melanogaster GN=RpL5 PE=1 SV=2 - [RL5_DROME]	2.00554	7.02	1	2	2	2	1.44659e+06	299	34.0158	9.77393
Q8T045	O-glucosyltransferase rumi OS=Drosophila melanogaster GN=rumi PE=1 SV=1 - [RUMI_DROME]	2.00238	2.68	1	1	1	1	879217	411	47.705	8.25049
Q9VJY6	60S ribosomal protein L24 OS=Drosophila melanogaster GN=RpL24 PE=1 SV=1 - [RL24_DROME]	2.00179	6.45	1	1	1	1	1.16423e+06	155	17.5089	11.063
Q9VW59	LD16419p OS=Drosophila melanogaster GN=RhoGDI PE=2 SV=1 - [Q9VW59_DROME]	1.99912	4.48	1	1	1	1	642720	201	23.2038	5.64307
Q8SXM8	Lysine--tRNA ligase OS=Drosophila melanogaster GN=Aats-lys PE=2 SV=1 - [Q8SXM8_DROME]	1.96252	1.22	2	1	1	1	626455	574	64.6199	6.50732
O61231	60S ribosomal protein L10 OS=Drosophila melanogaster GN=RpL10 PE=1 SV=1 - [RL10_DROME]	1.94588	4.13	1	1	1	1	1.45194e+06	218	25.5112	9.84717
P40793	Cdc42 homolog OS=Drosophila melanogaster GN=Cdc42 PE=1 SV=1 - [CDC42_DROME]	1.93634	5.76	3	1	1	1	700517	191	21.389	7.13721
E1JHM0	CdGAPr, isoform C OS=Drosophila melanogaster GN=CdGAPr PE=4 SV=1 - [E1JHM0_DROME]	1.93466	0.6	3	1	1	1		1840	203.747	7.12256
M9MRR7	Sh3beta, isoform C OS=Drosophila melanogaster GN=Sh3beta PE=4 SV=1 - [M9MRR7_DROME]	1.92972	7.53	4	1	1	1	126709	146	16.2269	4.50049
Q9VKY2	Cullin-associated NEDD8-dissociated protein 1 OS=Drosophila melanogaster GN=Cand1 PE=2 SV=1 - [CAND1_DROME]	1.92627	0.8	1	1	1	1	2.55256e+06	1248	139.267	5.87158
Q95RG1	LD32106p OS=Drosophila melanogaster GN=RpS9 PE=2 SV=1 - [Q95RG1_DROME]	1.91937	6.57	2	1	1	1	1.46132e+06	137	16.3123	10.7114
Q9VPN5	Hsp70/Hsp90 organizing protein homolog OS=Drosophila melanogaster GN=Hop PE=2 SV=1 - [Q9VPN5_DROME]	1.90882	3.27	1	2	2	2	3.46655e+06	490	55.6629	6.81494
Q9VKN5	CG14071, isoform A OS=Drosophila melanogaster GN=CG14071-RA PE=2 SV=1 - [Q9VKN5_DROME]	1.90642	6.62	1	1	1	1	3.55884e+06	136	15.1957	4.89404
M9ND61	Upstream of N-ras, isoform C OS=Drosophila melanogaster GN=Unr PE=4 SV=1 - [M9ND61_DROME]	1.90112	0.97	3	1	1	1	159101	1032	115.822	6.55127
Q9W198	CG3363 OS=Drosophila melanogaster GN=ocm PE=4 SV=1 - [Q9W198_DROME]	1.8973	0.78	1	1	1	1	477668	2175	241.812	9.08545
Q9W237	40S ribosomal protein S16 OS=Drosophila melanogaster GN=RpS16 PE=1 SV=1 - [RS16_DROME]	1.89671	14.86	1	2	2	2	2.50132e+06	148	16.7642	10.1694
Q9VAN0	Probable phosphoserine aminotransferase OS=Drosophila melanogaster GN=CG11899 PE=2 SV=1 - [SERC_DROME]	1.89082	2.75	1	1	1	1	441226	364	39.5153	8.41162
M9NFZ0	Myosin binding subunit, isoform P OS=Drosophila melanogaster GN=Mbs PE=4 SV=1 - [M9NFZ0_DROME]	1.88706	3.81	11	1	1	1	689934	341	37.7568	5.8335
Q9VB46	FI18644p1 OS=Drosophila melanogaster GN=Hmu PE=2 SV=1 - [Q9VB46_DROME]	1.88559	1.73	1	1	1	1	93284.7	579	63.3763	9.34912
Q9XZ61	26S proteasome regulatory complex subunit p37A OS=Drosophila melanogaster GN=Uch-L5 PE=2 SV=1 - [Q9XZ61_DROME]	1.88033	2.78	1	1	1	1	546564	324	37.6491	5.21143
Q9VA91	40S ribosomal protein S7 OS=Drosophila melanogaster GN=RpS7 PE=1 SV=1 - [RS7_DROME]	1.87913	4.64	1	1	1	1	2.11714e+06	194	22.1563	9.80322
Q9V3W1	Tetratricopeptide repeat protein 2 OS=Drosophila melanogaster GN=Tpr2 PE=2 SV=1 - [Q9V3W1_DROME]	1.86297	1.38	1	1	1	1	692368	508	57.9592	6.49365
Q9VVU1	CG3902 OS=Drosophila melanogaster GN=CG3902-RA PE=2 SV=1 - [Q9VVU1_DROME]	1.85849	2.17	1	1	1	1	381744	414	45.337	6.7124
Q9VC48	Methionine aminopeptidase 1 OS=Drosophila melanogaster GN=CG13630 PE=2 SV=1 - [Q9VC48_DROME]	1.85651	6.15	1	2	2	2	477080	374	41.6995	6.93213
Q9VB21	CG5639 OS=Drosophila melanogaster GN=CG5639 PE=4 SV=1 - [Q9VB21_DROME]	1.84436	0.66	1	1	1	1		1511	165.786	6.18896
Q9VWT3	Gamma-glutamyl transpeptidase OS=Drosophila melanogaster GN=Ggt-1 PE=2 SV=2 - [Q9VWT3_DROME]	1.84294	1.73	1	1	1	1	280446	579	62.8318	5.89697
Q9VD29	RE74312p OS=Drosophila melanogaster GN=Sar1 PE=2 SV=1 - [Q9VD29_DROME]	1.84264	5.7	1	1	1	1	192574	193	21.7973	6.93213
P22465-2	Isoform A of Annexin B10 OS=Drosophila melanogaster GN=AnxB10 - [ANX10_DROME]	1.82887	4.06	2	1	1	1	105652	320	35.5678	4.76709
M9NES5	Histone gene-specific epigenetic repressor in late S phase, isoform H OS=Drosophila melanogaster GN=Hers PE=4 SV=1 - [M9NES5_DROME]	1.82578	1.05	4	1	1	1		1139	123.908	8.73389
Q8SXQ1	CG9629 OS=Drosophila melanogaster GN=CG9629 PE=2 SV=1 - [Q8SXQ1_DROME]	1.81303	1.67	1	1	1	1	72633	540	58.2782	7.44482
Q9VGQ1	CG5214 OS=Drosophila melanogaster GN=CG5214 PE=2 SV=1 - [Q9VGQ1_DROME]	1.81107	3.21	1	2	2	2	271946	468	49.8923	9.46631
Q7YZA4	Dishevelled associated activator of morphogenesis, isoform A OS=Drosophila melanogaster GN=DAAM PE=4 SV=1 - [Q7YZA4_DROME]	1.80923	1.08	3	1	1	1		1114	125.433	6.97607
Q9V8R9	Protein 4.1 homolog OS=Drosophila melanogaster GN=cora PE=1 SV=1 - [41_DROME]	1.79911	0.65	1	1	1	1	350573	1698	184.056	8.70459
O02373	UDP-glucose 6-dehydrogenase OS=Drosophila melanogaster GN=sgl PE=1 SV=1 - [UGDH_DROME]	1.79085	2.73	1	1	1	1	338381	476	52.8412	6.17627
Q9W3C1	Polycomb protein l(1)G0020 OS=Drosophila melanogaster GN=l(1)G0020 PE=1 SV=2 - [U202_DROME]	1.78035	1.19	1	1	1	1	1.13111e+06	1008	112.803	8.52881
Q9VU68-2	Isoform B of Actin-interacting protein 1 OS=Drosophila melanogaster GN=flr - [WDR1_DROME]	1.78001	1.82	2	1	1	1	162072	604	66.0704	6.72705
Q9VH69	40S ribosomal protein S29 OS=Drosophila melanogaster GN=RpS29 PE=1 SV=1 - [RS29_DROME]	1.77576	12.5	1	1	1	1	6.15934e+06	56	6.58621	9.61279
Q9VAI9	Odorant-binding protein 99c OS=Drosophila melanogaster GN=Obp99c PE=2 SV=1 - [Q9VAI9_DROME]	1.76897	5.96	1	1	1	1	856928	151	16.9876	7.6792
Q9W2P5	CG9344 OS=Drosophila melanogaster GN=CG9344 PE=1 SV=1 - [Q9W2P5_DROME]	1.76506	13.92	1	1	1	2	536127	79	9.01762	9.20264
Q24117	Dynein light chain 1, cytoplasmic OS=Drosophila melanogaster GN=ctp PE=1 SV=1 - [DYL1_DROME]	1.76116	7.87	1	1	1	1	510949	89	10.3671	7.37158
Q7KS38	40S ribosomal protein S19b OS=Drosophila melanogaster GN=RpS19b PE=2 SV=3 - [RS19B_DROME]	1.75388	7.1	1	1	1	1		155	17.3511	10.2134
Q9W3J6	CG17982 OS=Drosophila melanogaster GN=CG17982-RA PE=2 SV=1 - [Q9W3J6_DROME]	1.7532	2.33	1	1	1	1	8.11974e+06	301	33.7776	9.40771
B7Z0B3	CG10359, isoform G OS=Drosophila melanogaster GN=CG10359 PE=4 SV=1 - [B7Z0B3_DROME]	1.75165	2.4	1	1	1	1	953285	459	51.0387	6.80029
P50882	60S ribosomal protein L9 OS=Drosophila melanogaster GN=RpL9 PE=1 SV=2 - [RL9_DROME]	1.75089	4.74	1	1	1	2	807781	190	21.3783	9.68604
Q0E8P6	Beethoven OS=Drosophila melanogaster GN=btv PE=4 SV=3 - [Q0E8P6_DROME]	1.7503	0.24	1	1	1	1	1.98057e+06	4236	480.986	6.56592
Q9VL70	HL08109p OS=Drosophila melanogaster GN=yip2 PE=2 SV=1 - [Q9VL70_DROME]	1.74702	2.76	1	1	1	1	666793	398	41.5841	8.51416
Q9VN50	Eukaryotic translation initiation factor 3 subunit F-1 OS=Drosophila melanogaster GN=eIF3-S5-1 PE=2 SV=1 - [EI3F1_DROME]	1.74245	3.93	1	1	1	1	1.63444e+06	280	31.085	6.52197
P10041	Neurogenic locus protein delta OS=Drosophila melanogaster GN=Dl PE=1 SV=2 - [DL_DROME]	1.74108	1.32	1	1	1	1	351414	833	88.7814	6.75635
Q9W3C3	CG2004, isoform A OS=Drosophila melanogaster GN=CG2004 PE=2 SV=1 - [Q9W3C3_DROME]	1.73278	2.35	1	1	1	2	1.41849e+06	425	48.2563	5.21143
Q8T8R1	CCHC-type zinc finger protein CG3800 OS=Drosophila melanogaster GN=CG3800 PE=1 SV=1 - [Y3800_DROME]	1.72841	3.64	1	1	1	1	151273	165	17.6028	8.646
A1ZA55	CG12970, isoform B OS=Drosophila melanogaster GN=CG12970 PE=4 SV=1 - [A1ZA55_DROME]	1.72398	2.03	2	1	1	1	338600	394	45.0923	9.24658
Q8INT3	CG31544 OS=Drosophila melanogaster GN=CG31544 PE=4 SV=2 - [Q8INT3_DROME]	1.72277	4.18	1	1	1	1	761775	263	29.5706	9.14404
Q9XZ63	Mesencephalic astrocyte-derived neurotrophic factor homolog OS=Drosophila melanogaster GN=Manf PE=1 SV=2 - [ARMET_DROME]	1.71902	12.14	1	3	3	5	1.49463e+06	173	20.1234	8.23584
Q9VVH5	AT13736p OS=Drosophila melanogaster GN=CG7580 PE=4 SV=1 - [Q9VVH5_DROME]	1.71013	8.99	1	1	1	1	1.19088e+06	89	10.0864	10.0815
P41374	Eukaryotic translation initiation factor 2 subunit 1 OS=Drosophila melanogaster GN=eIF-2alpha PE=2 SV=1 - [IF2A_DROME]	1.70765	5.28	1	2	2	2	699938	341	38.6217	4.94482
Q23978	Myosin-IA OS=Drosophila melanogaster GN=Myo31DF PE=2 SV=1 - [MY31D_DROME]	1.70453	1.48	1	1	1	1	479520	1011	117.022	9.42236
Q9VSS1	Pixie, isoform A OS=Drosophila melanogaster GN=pix PE=2 SV=1 - [Q9VSS1_DROME]	1.70294	1.96	1	1	1	1	55131.1	611	69.254	8.1333
Q9VCH5	Nup98 OS=Drosophila melanogaster GN=Nup98-96 PE=4 SV=3 - [Q9VCH5_DROME]	1.70028	0.51	1	1	1	1	417781	1960	210.007	6.52197
Q9VNE9	60S ribosomal protein L13a OS=Drosophila melanogaster GN=RpL13A PE=1 SV=1 - [RL13A_DROME]	1.69801	16.59	1	3	3	3	725091	205	23.6322	11.0337
Q0E9B5	CG8841, isoform A OS=Drosophila melanogaster GN=CG8841 PE=4 SV=1 - [Q0E9B5_DROME]	1.69491	0.96	1	1	1	1		837	95.5336	5.78271
Q24246-4	Isoform 1c of Cytoplasmic dynein 1 intermediate chain OS=Drosophila melanogaster GN=sw - [DYIN_DROME]	1.69213	1.44	11	1	1	1	1.75901e+06	626	69.4043	5.42725
Q8T4C9	AT03632p OS=Drosophila melanogaster GN=CG6310 PE=2 SV=1 - [Q8T4C9_DROME]	1.68852	5.18	1	1	1	1	442361	193	22.3984	9.30518
Q9VRL3	Probable prefoldin subunit 4 OS=Drosophila melanogaster GN=CG10635 PE=3 SV=1 - [PFD4_DROME]	1.68828	5.8	1	1	1	1	621534	138	15.926	4.94482
Q9W0N8	CG3344 OS=Drosophila melanogaster GN=CG3344 PE=2 SV=1 - [Q9W0N8_DROME]	1.68824	1.57	1	1	1	1	1.64955e+06	446	49.4365	5.08447
Q9VBH8	FI02850p OS=Drosophila melanogaster GN=RpL34a PE=1 SV=2 - [Q9VBH8_DROME]	1.68408	4.32	2	1	1	1	4.71751e+06	162	18.0574	11.4438
Q9VID9	CG8677 OS=Drosophila melanogaster GN=CG8677 PE=4 SV=3 - [Q9VID9_DROME]	1.67223	0.34	1	1	1	2	5.02223e+06	2663	292.385	5.2749
A8JQU3	Gasp, isoform B OS=Drosophila melanogaster GN=Gasp PE=4 SV=1 - [A8JQU3_DROME]	1.66369	4.68	2	1	1	1	851957	235	26.0768	4.75439
Q9VYH8	CG15721 OS=Drosophila melanogaster GN=CG15721 PE=4 SV=2 - [Q9VYH8_DROME]	1.66186	1.01	1	1	1	1	213240	894	98.4417	5.04639
Q7JVK6	GM27569p OS=Drosophila melanogaster GN=trsn PE=1 SV=1 - [Q7JVK6_DROME]	1.6486	5.11	1	1	1	1	657258	235	27.0091	5.50342
A1Z713	Vacuolar protein sorting 13 OS=Drosophila melanogaster GN=Vps13 PE=4 SV=2 - [A1Z713_DROME]	1.63817	0.24	1	1	1	1	4.66624e+08	3321	374.309	5.84619
Q9V3L1	Bifunctional heparan sulfate N-deacetylase/N-sulfotransferase OS=Drosophila melanogaster GN=sfl PE=1 SV=1 - [NDST_DROME]	1.63538	0.76	1	1	1	1	1.22084e+06	1048	118.515	8.63135
Q9VAC4	CG7911 OS=Drosophila melanogaster GN=CG7911 PE=4 SV=1 - [Q9VAC4_DROME]	1.62967	5.77	1	1	1	1	1.10631e+06	156	17.3586	4.56396
Q9W587	CG14778 OS=Drosophila melanogaster GN=CG14778 PE=4 SV=1 - [Q9W587_DROME]	1.62806	5.91	1	1	1	1	5.46702e+06	186	21.2669	9.26123
Q9VJ38	39S ribosomal protein L13, mitochondrial OS=Drosophila melanogaster GN=mRpL13 PE=2 SV=2 - [RM13_DROME]	1.62239	7.87	1	1	2	2	1.58256e+06	178	21.0767	8.74854
A1ZAK4	Dek, isoform A OS=Drosophila melanogaster GN=Dek PE=2 SV=1 - [A1ZAK4_DROME]	1.61375	1.51	3	1	1	1		663	71.8518	4.85596
Q8IPT1	CG32441, isoform D OS=Drosophila melanogaster GN=CG32441 PE=4 SV=2 - [Q8IPT1_DROME]	1.6129	4.21	2	1	1	1	1.49477e+06	214	23.7131	5.26221
Q9VLJ6	Angiotensin-converting enzyme-related protein OS=Drosophila melanogaster GN=Acer PE=1 SV=1 - [ACER_DROME]	0	0.95	3	1	1	1	377175	630	73.0109	6.354
Q9VLD6	Borealin OS=Drosophila melanogaster GN=borr PE=1 SV=1 - [BOREA_DROME]	0	3.81	2	1	1	1		315	34.6591	10.0815
Q24298	DE-cadherin OS=Drosophila melanogaster GN=shg PE=1 SV=2 - [CADE_DROME]	0	1.66	1	3	3	5	525136	1507	169.715	4.77979
Q7PLI7	Serine/threonine-protein kinase CG17528 OS=Drosophila melanogaster GN=CG17528 PE=1 SV=1 - [DCLK_DROME]	0	1.6	1	1	1	1		748	82.9195	7.76709
P23128-2	Isoform B of Putative ATP-dependent RNA helicase me31b OS=Drosophila melanogaster GN=me31B - [DDX6_DROME]	0	2.34	2	1	1	2	297458	428	48.6124	7.97217
P40427	Homeobox protein extradenticle OS=Drosophila melanogaster GN=exd PE=1 SV=1 - [EXD_DROME]	0	1.6	1	1	1	1	1.44811e+06	376	41.6654	7.00537
Q9VEN1-2	Isoform 2 of Filamin-A OS=Drosophila melanogaster GN=cher - [FLNA_DROME]	0	4.06	5	2	2	2	525375	838	90.3713	6.53662
P52029	Glucose-6-phosphate isomerase OS=Drosophila melanogaster GN=Pgi PE=2 SV=2 - [G6PI_DROME]	0	2.69	1	1	1	1	252568	558	62.2999	7.12256
Q7K3B9	Methyltransferase-like protein 16 homolog OS=Drosophila melanogaster GN=CG7544 PE=2 SV=1 - [MET16_DROME]	0	1.97	1	1	1	1	548805	305	35.1238	7.98682
Q9V3Z6	Myosin-VIIa OS=Drosophila melanogaster GN=ck PE=1 SV=1 - [MYO7A_DROME]	0	0.6	1	1	1	1		2167	250.151	8.92432
P23654	Neurotactin OS=Drosophila melanogaster GN=Nrt PE=1 SV=3 - [NRT_DROME]	0	1.18	1	1	1	1	933102	846	92.7183	5.30029
P48611	6-pyruvoyl tetrahydrobiopterin synthase OS=Drosophila melanogaster GN=pr PE=1 SV=1 - [PTPS_DROME]	0	5.36	1	1	1	1		168	19.3248	7.21045
P41092	60S ribosomal protein L27a OS=Drosophila melanogaster GN=RpL27A PE=1 SV=2 - [RL27A_DROME]	0	7.38	1	1	1	1	1.18397e+06	149	17.0113	10.7114
Q9W5N2	60S ribosomal protein L38 OS=Drosophila melanogaster GN=RpL38 PE=1 SV=1 - [RL38_DROME]	0	14.29	1	1	1	1	404083	70	8.19464	10.2866
P17704	40S ribosomal protein S17 OS=Drosophila melanogaster GN=RpS17 PE=1 SV=2 - [RS17_DROME]	0	10.69	1	1	1	1	1.04785e+06	131	15.2752	9.93506
Q24179	Protein sly1 homolog OS=Drosophila melanogaster GN=Slh PE=2 SV=4 - [SLY1_DROME]	0	0.94	1	1	1	1	4.82738e+06	639	72.3202	6.18896
Q9Y105	Probable glutamine--tRNA ligase OS=Drosophila melanogaster GN=Aats-gln PE=1 SV=1 - [SYQ_DROME]	0	0.9	1	1	1	1	384131	778	87.4531	7.21045
P17789	Protein tramtrack, beta isoform OS=Drosophila melanogaster GN=ttk PE=1 SV=2 - [TTKB_DROME]	0	2.64	1	1	1	1	91611.1	643	68.7279	7.59131
P31409	V-type proton ATPase subunit B OS=Drosophila melanogaster GN=Vha55 PE=2 SV=1 - [VATB_DROME]	0	2.24	1	1	1	1	170257	490	54.5149	5.40186
Q9VC52	LD41392p OS=Drosophila melanogaster GN=Ppox PE=2 SV=1 - [Q9VC52_DROME]	0	1.26	1	1	1	1	4.69139e+06	475	53.168	9.45166
Q9VHY6	CG2943 OS=Drosophila melanogaster GN=CG2943 PE=2 SV=1 - [Q9VHY6_DROME]	0	1.09	1	1	1	1	225229	915	100.852	8.1333
Q9VY34	BetaNACtes4 OS=Drosophila melanogaster GN=betaNACtes4 PE=2 SV=1 - [Q9VY34_DROME]	0	9.51	1	1	1	1		263	28.5016	9.12939
Q9VEK8	GH07711p OS=Drosophila melanogaster GN=sds22 PE=2 SV=1 - [Q9VEK8_DROME]	0	2.76	1	1	1	1	396742	326	37.7674	5.03369
Q9VEP6	CG3590 OS=Drosophila melanogaster GN=AdSL PE=2 SV=1 - [Q9VEP6_DROME]	0	4.16	1	1	1	1	469605	481	53.7638	7.48877
Q9W0B8	Alpha-coatomer protein, isoform A OS=Drosophila melanogaster GN=alphaCOP PE=2 SV=1 - [Q9W0B8_DROME]	0	1.22	1	1	1	1	243561	1234	139.241	7.6499
Q9VC47	GH23184p OS=Drosophila melanogaster GN=tok PE=2 SV=1 - [Q9VC47_DROME]	0	1.16	1	1	1	1	2.56586e+06	1464	165.115	6.30322
Q9VHT3	CG9617 protein OS=Drosophila melanogaster GN=Sgt1 PE=2 SV=1 - [Q9VHT3_DROME]	0	8.99	1	1	1	1	619362	178	20.2315	6.81494
Q7JQV2	CG9279, isoform B OS=Drosophila melanogaster GN=CG9279 PE=2 SV=1 - [Q7JQV2_DROME]	0	1.05	1	1	1	1	139210	1339	152.441	6.21436
Q9VW01	CG9452 OS=Drosophila melanogaster GN=CG9452 PE=2 SV=2 - [Q9VW01_DROME]	0	1.9	1	1	1	1		422	48.9517	7.98682
Q8IR42	Drop dead OS=Drosophila melanogaster GN=drd PE=2 SV=2 - [Q8IR42_DROME]	0	1.45	1	1	1	1		827	93.5196	8.60205
Q95RV5	Ribulose-phosphate 3-epimerase OS=Drosophila melanogaster GN=CG1364 PE=2 SV=1 - [Q95RV5_DROME]	0	7.24	1	1	1	2	976384	221	24.2122	5.40186
Q9VAD0	Acid phosphatase 1, isoform A OS=Drosophila melanogaster GN=Acph-1 PE=2 SV=1 - [Q9VAD0_DROME]	0	3.65	2	2	2	2	695153	438	50.1053	6.68311
C0PUZ9	Glycogenin, isoform C OS=Drosophila melanogaster GN=Glycogenin-RB PE=2 SV=1 - [C0PUZ9_DROME]	0	2.19	2	1	1	1	1.00655e+06	274	31.0388	5.99854
Q7K2W2	CG11060 OS=Drosophila melanogaster GN=CG11060 PE=2 SV=1 - [Q7K2W2_DROME]	0	1.56	1	1	1	1	547521	706	81.9157	6.59521
Q8IR21	CG42354, isoform A OS=Drosophila melanogaster GN=CG42353-RA PE=2 SV=1 - [Q8IR21_DROME]	0	2.39	2	1	1	1		502	56.6309	6.07471
Q9W3T2	CG4593 OS=Drosophila melanogaster GN=CG4593-RA PE=2 SV=1 - [Q9W3T2_DROME]	0	7.18	1	1	1	1	1.14926e+07	209	24.7734	6.56592
Q4V424	CG12620, isoform A OS=Drosophila melanogaster GN=CG12620 PE=2 SV=1 - [Q4V424_DROME]	0	1.74	1	1	1	1	1.25532e+06	287	32.8461	4.91943
Q9VRY3	Dikar, isoform B OS=Drosophila melanogaster GN=dikar PE=2 SV=2 - [Q9VRY3_DROME]	0	1.75	4	1	1	1	642064	342	39.4979	7.44482
Q9VVG0	Cadherin 74A, isoform A OS=Drosophila melanogaster GN=Cad74A PE=4 SV=1 - [Q9VVG0_DROME]	0	0.66	1	1	1	1	2181052	1820	200.874	4.95752
Q5BI31	CG12179, isoform C OS=Drosophila melanogaster GN=CG12179 PE=2 SV=1 - [Q5BI31_DROME]	0	0.68	1	1	1	1	3.37798e+06	1322	148.031	9.30518
Q9V3N1	LD24467p OS=Drosophila melanogaster GN=Spn27A PE=2 SV=1 - [Q9V3N1_DROME]	0	2.24	1	1	1	1	80388.3	447	49.7645	6.1001
Q9VIW1	AT17811p OS=Drosophila melanogaster GN=CG10026 PE=2 SV=1 - [Q9VIW1_DROME]	0	1.72	7	1	1	2	1.21695e+07	290	34.0585	7.66455
Q9W081	AT01075p OS=Drosophila melanogaster GN=CG13923-RA PE=2 SV=3 - [Q9W081_DROME]	0	4.45	1	1	1	1		427	50.1079	6.15088
Q9VMM2	CG11034 OS=Drosophila melanogaster GN=CG11034 PE=4 SV=2 - [Q9VMM2_DROME]	0	1.33	1	1	1	1	1.85257e+06	751	84.9163	5.03369
Q7KUH2	Mucin 68Ca OS=Drosophila melanogaster GN=Muc68Ca PE=4 SV=1 - [Q7KUH2_DROME]	0	0.67	1	1	1	1		3135	308.905	4.10693
Q9VAV6	CG1894 OS=Drosophila melanogaster GN=CG1894 PE=4 SV=1 - [Q9VAV6_DROME]	0	4.51	1	1	1	1	319406	421	48.3938	8.96826
M9PDN3	CG12105, isoform B OS=Drosophila melanogaster GN=CG12105 PE=4 SV=1 - [M9PDN3_DROME]	0	0.78	2	1	1	1	375025	1154	127.932	5.59229
Q9VTR6	Pericardin OS=Drosophila melanogaster GN=prc PE=4 SV=2 - [Q9VTR6_DROME]	0	1.4	1	1	1	1		1713	163.402	5.63037
M9PF12	X11L, isoform D OS=Drosophila melanogaster GN=X11L PE=4 SV=1 - [M9PF12_DROME]	0	1.29	3	1	1	1	641022	1163	126.195	5.021
M9PG27	Adenylyl cyclase 78C, isoform D OS=Drosophila melanogaster GN=Ac78C PE=3 SV=1 - [M9PG27_DROME]	0	0.59	4	1	1	1	460481	1694	186.105	7.2251
Q8INJ6	Glorund, isoform C OS=Drosophila melanogaster GN=glo PE=4 SV=1 - [Q8INJ6_DROME]	0	5.59	2	1	1	1	1.80105e+06	179	19.8768	5.16064
Q0KI16	Molting defective, isoform B OS=Drosophila melanogaster GN=mld PE=4 SV=1 - [Q0KI16_DROME]	0	1.68	2	1	1	1		1728	193.967	6.18896
A8Y4X3	Lethal (2) 41Ab, isoform B OS=Drosophila melanogaster GN=l(2)41Ab PE=4 SV=1 - [A8Y4X3_DROME]	0	1.12	2	1	1	1		807	95.1936	8.77783
A8DYW1	CG31638, isoform B OS=Drosophila melanogaster GN=CG31638 PE=4 SV=1 - [A8DYW1_DROME]	0	0.97	6	1	1	1	5.10971e+06	514	59.347	5.71924
Q5LJN5	Male fertility factor kl5 (Fragment) OS=Drosophila melanogaster GN=kl-5 PE=4 SV=2 - [Q5LJN5_DROME]	0	0.29	4	1	1	1	273120	2373	274.475	5.8208
Q9VX44	Lethal (1) G0222, isoform F OS=Drosophila melanogaster GN=l(1)G0222 PE=4 SV=2 - [Q9VX44_DROME]	0	0.72	2	1	1	1	1.15356e+07	1110	122.965	8.25049
M9MSI8	Tweek, isoform I OS=Drosophila melanogaster GN=tweek PE=4 SV=1 - [M9MSI8_DROME]	0	0.1	4	1	1	1	3.47738e+06	5075	564.426	7.31299
E1JH64	Short stop, isoform Q OS=Drosophila melanogaster GN=shot PE=4 SV=1 - [E1JH64_DROME]	0	0.12	15	1	1	1	185840	5155	588.566	6.44287
E6EK18	Plasma membrane calcium ATPase, isoform R OS=Drosophila melanogaster GN=PMCA PE=3 SV=1 - [E6EK18_DROME]	0	1.4	1	1	1	1		1210	133.255	6.58057
Q9W080	GV1, isoform A OS=Drosophila melanogaster GN=GV1 PE=4 SV=3 - [Q9W080_DROME]	0	3.41	1	1	1	1	2.95028e+06	293	32.1614	9.46631
Q9VWZ3	Dynein heavy chain at 16F OS=Drosophila melanogaster GN=Dhc16F PE=4 SV=1 - [Q9VWZ3_DROME]	0	0.17	1	1	1	1		4081	468.776	6.3667
M9PCW6	Ca2+-channel-protein-beta-subunit, isoform M OS=Drosophila melanogaster GN=Ca-beta PE=4 SV=1 - [M9PCW6_DROME]	0	0.73	5	1	1	1	2.29484e+07	682	77.5812	7.72314
