# Supplementary material for: Mysterious inhibitory cell regulator investigated and found likely to be secretogranin II related
Source: PeerJ. 2017 Oct 13;5:e3833. doi: 10.7717/peerj.3833 (PMC5642266; doi:10.7717/peerj.3833)
Supplement: Supplemental Information 8 — Fixed test specifics 30. [file peerj-05-3833-s008.xlsx]

## Sheet: Sheet1
Accession	Description	A5: Area	B5: Area	Score A2	Coverage A2	# Peptides A2	# PSM A2	Score B2	Coverage B2	# Peptides B2	# PSM B2	# AAs	MW [kDa]	calc. pI
Q9VDH8	Ribosomal protein S30, isoform A OS=Drosophila melanogaster GN=RpS30 PE=1 SV=1 - [Q9VDH8_DROME]	0	1.37637e+08					11.4336	7.58	1	4	132	14.5757	10.0522
Q9W2R3	LP03320p OS=Drosophila melanogaster GN=sktl PE=2 SV=2 - [Q9W2R3_DROME]	0	3.39437e+07					10.1527	2.02	1	3	792	87.703	7.31299
Q9W1J3	Gastrulation defective protein 1 homolog OS=Drosophila melanogaster GN=CG5543 PE=2 SV=1 - [GAD1_DROME]	0	2.73601e+07					2.19551	1.68	1	1	655	73.5615	7.00537
A1Z8G7	CG9080 OS=Drosophila melanogaster GN=Listericin PE=2 SV=1 - [A1Z8G7_DROME]	0	2.67271e+07					2.35701	23.14	1	1	121	11.6826	8.90967
Q9VBD8	RT02919p OS=Drosophila melanogaster GN=TwdlO PE=2 SV=1 - [Q9VBD8_DROME]	0	2.59988e+07					2.07568	4.37	1	1	229	24.4402	8.36768
P02255	Histone H1 OS=Drosophila melanogaster GN=His1 PE=1 SV=1 - [H1_DROME]	0	1.70018e+07					56.9721	10.94	3	23	256	26.3433	10.5356
M9NFR5	Ypsilon schachtel, isoform B OS=Drosophila melanogaster GN=yps PE=4 SV=1 - [M9NFR5_DROME]	0	1.43716e+07					54.2279	32.35	7	16	340	36.9564	10.0083
Q9VJ26	EF-hand domain-containing protein D2 homolog OS=Drosophila melanogaster GN=Swip-1 PE=2 SV=1 - [EFHD2_DROME]	0	1.05983e+07					12.0615	5.07	1	5	217	25.0714	5.13525
Q9V3E7	Aly OS=Drosophila melanogaster GN=Ref1 PE=2 SV=1 - [Q9V3E7_DROME]	0	6.97778e+06					14.5891	17.67	4	5	266	27.8347	10.5503
M9PEM4	CG42540, isoform H OS=Drosophila melanogaster GN=CG32245 PE=4 SV=1 - [M9PEM4_DROME]	0	5.86264e+06					2.50886	2.04	1	1	393	44.0614	5.49072
Q9VIM5	Actin-related protein 2/3 complex subunit 2 OS=Drosophila melanogaster GN=Arpc2 PE=2 SV=2 - [ARPC2_DROME]	0	5.3591e+06					2.62057	4.32	1	1	301	35.0822	7.91357	A: Unfixed
P26308	Guanine nucleotide-binding protein subunit beta-1 OS=Drosophila melanogaster GN=Gbeta13F PE=1 SV=1 - [GBB1_DROME]	0	4.29332e+06					0	1.47	1	1	340	37.1089	6.44287
Q9VWB8	Nucleoporin 205, isoform A OS=Drosophila melanogaster GN=Nup205 PE=4 SV=2 - [Q9VWB8_DROME]	0	3.42028e+06					0	0.77	1	1	2067	232.582	6.66846
Q24154	60S ribosomal protein L29 OS=Drosophila melanogaster GN=RpL29 PE=1 SV=1 - [RL29_DROME]	0	2.79423e+06					4.52858	22.37	2	2	76	8.91486	11.3413
C5WLT4	IP03318p OS=Drosophila melanogaster GN=mGluR PE=2 SV=1 - [C5WLT4_DROME]	0	2.57595e+06					3.16862	7.32	1	1	533	59.3406	6.01123
P26019	DNA polymerase alpha catalytic subunit OS=Drosophila melanogaster GN=DNApol-alpha180 PE=1 SV=2 - [DPOLA_DROME]	0	1.67299e+06					0	2.08	1	1	1488	169.796	8.01611
P22058	Chromosomal protein D1 OS=Drosophila melanogaster GN=D1 PE=1 SV=3 - [CPD1_DROME]	0	1.60021e+06					8.46042	3.94	1	3	355	36.9789	6.63916	B: Fixed
Q9W0S4	FI07208p OS=Drosophila melanogaster GN=miple2 PE=2 SV=1 - [Q9W0S4_DROME]	0	1.31077e+06					3.76381	7.17	1	1	279	30.4425	10.228
Q9W2X8	CG43902 OS=Drosophila melanogaster GN=CG12644 PE=4 SV=2 - [Q9W2X8_DROME]	0	834885					2.41777	1.89	1	1	1220	136.662	6.354
Q9NDJ2-2	Isoform B of Helicase domino OS=Drosophila melanogaster GN=dom - [DOM_DROME]	0	772927					0	1	1	1	2497	274.446	6.37939
M9PGZ6	Zormin, isoform H OS=Drosophila melanogaster GN=zormin PE=4 SV=1 - [M9PGZ6_DROME]	0	722609					0	0.2	1	1	2934	330.754	5.74463
Q9W334	40S ribosomal protein S28 OS=Drosophila melanogaster GN=RpS28b PE=1 SV=2 - [RS28_DROME]	0	708433					2.74052	18.46	1	1	65	7.47205	10.3745
Q0KHS7	Lipid storage droplets surface-binding protein OS=Drosophila melanogaster GN=Lsd-2 PE=3 SV=1 - [Q0KHS7_DROME]	0	621489					2.83573	4.18	1	1	335	36.3448	8.79248
Q7PL78	CG40005 (Fragment) OS=Drosophila melanogaster GN=CG40005 PE=4 SV=3 - [Q7PL78_DROME]	0	533990					2.39504	3.41	1	1	323	37.5773	8.14795
O61492-2	Isoform B of Flotillin-2 OS=Drosophila melanogaster GN=Flo-2 - [FLOT2_DROME]	0	364801					2.19543	3.53	1	1	425	46.5733	5.89697
D3PFF6	GH16248p OS=Drosophila melanogaster GN=Pitslre PE=2 SV=1 - [D3PFF6_DROME]	0	226494					2.13404	1.29	1	1	778	88.7444	7.98682
Q9VGM1	CG14709 OS=Drosophila melanogaster GN=Mrp4 PE=2 SV=2 - [Q9VGM1_DROME]	0	0					0	0.68	1	1	1316	147.782	7.59131
Q9VND0	Meiosis I arrest, isoform A OS=Drosophila melanogaster GN=mia PE=4 SV=3 - [Q9VND0_DROME]	0	0					2.44902	1.36	1	1	589	65.9423	9.23193
M9MS14	Moody, isoform C OS=Drosophila melanogaster GN=moody PE=3 SV=1 - [M9MS14_DROME]	0	0					0	3.16	1	1	633	69.0001	8.79248
Q9Y114	BcDNA.GH10229 OS=Drosophila melanogaster GN=BcDNA.GH10229 PE=2 SV=1 - [Q9Y114_DROME]	0	0					1.88151	2.74	1	1	656	71.1611	6.7417
