# Supplementary material for: Mysterious inhibitory cell regulator investigated and found likely to be secretogranin II related
Source: PeerJ. 2017 Oct 13;5:e3833. doi: 10.7717/peerj.3833 (PMC5642266; doi:10.7717/peerj.3833)
Supplement: Supplemental Information 10 — Total test hits 1516. [file peerj-05-3833-s010.xlsx]

## Sheet: Sheet1
Accession	Description	Score	Coverage	# Proteins	# Unique Peptides	# Peptides	# PSMs	Area	# AAs	MW [kDa]	calc. pI
G3V6P7	Myosin, heavy polypeptide 9, non-muscle OS=Rattus norvegicus GN=LOC100911597 PE=4 SV=1 - [G3V6P7_RAT]	975.98	41.02	16	59	79	377	1.47497e+08	1960	226.273	5.65576
P48500	Triosephosphate isomerase OS=Rattus norvegicus GN=Tpi1 PE=1 SV=2 - [TPIS_RAT]	784.395	74.3	4	16	16	258	4.61774e+08	249	26.8318	7.23975
P60711	Actin, cytoplasmic 1 OS=Rattus norvegicus GN=Actb PE=1 SV=1 - [ACTB_RAT]	707.657	46.13	9	5	18	313	1.31387e+09	375	41.7097	5.47803
P00762	Anionic trypsin-1 OS=Rattus norvegicus GN=Prss1 PE=1 SV=1 - [TRY1_RAT]	566.112	8.13	1	1	1	138	1.9399e+08	246	25.9427	4.89404
G3V9Y1	Myosin, heavy polypeptide 10, non-muscle, isoform CRA_b OS=Rattus norvegicus GN=Myh10 PE=4 SV=1 - [G3V9Y1_RAT]	516.594	31.22	19	40	60	211	1.22658e+08	1976	228.857	5.5415
P68035	Actin, alpha cardiac muscle 1 OS=Rattus norvegicus GN=Actc1 PE=2 SV=1 - [ACTC_RAT]	421.388	31.83	6	1	13	201	8.94661e+08	377	41.9919	5.38916
Q62952-2	Isoform 2 of Dihydropyrimidinase-related protein 3 OS=Rattus norvegicus GN=Dpysl3 - [DPYL3_RAT]	340.699	41.43	2	18	22	110	1.46729e+08	683	73.8529	6.45557
P69897	Tubulin beta-5 chain OS=Rattus norvegicus GN=Tubb5 PE=1 SV=1 - [TBB5_RAT]	336.581	43.69	3	3	18	118	6.81876e+07	444	49.639	4.89404
G3V7C6	RCG45400 OS=Rattus norvegicus GN=Tubb4b PE=3 SV=1 - [G3V7C6_RAT]	329.845	43.6	4	2	18	114	5.69841e+07	445	49.799	4.89404
P63018	Heat shock cognate 71 kDa protein OS=Rattus norvegicus GN=Hspa8 PE=1 SV=1 - [HSP7C_RAT]	307.502	44.12	13	26	28	128	6.05876e+07	646	70.8272	5.51611
P85108	Tubulin beta-2A chain OS=Rattus norvegicus GN=Tubb2a PE=1 SV=1 - [TBB2A_RAT]	297.787	43.6	3	3	18	104	5.44822e+07	445	49.875	4.89404
F1LNF0	Protein Myh14 OS=Rattus norvegicus GN=Myh14 PE=2 SV=1 - [F1LNF0_RAT]	292.989	20.2	16	26	38	107	8.67632e+07	2000	228.775	5.5542
P47942	Dihydropyrimidinase-related protein 2 OS=Rattus norvegicus GN=Dpysl2 PE=1 SV=1 - [DPYL2_RAT]	276.461	41.43	1	14	18	95	8.84721e+07	572	62.2386	6.37939
Q6P9V9	Tubulin alpha-1B chain OS=Rattus norvegicus GN=Tuba1b PE=1 SV=1 - [TBA1B_RAT]	271.329	41.02	2	0	16	100	1.24754e+08	451	50.1196	5.05908
P68370	Tubulin alpha-1A chain OS=Rattus norvegicus GN=Tuba1a PE=1 SV=1 - [TBA1A_RAT]	257.913	41.02	5	0	16	96	1.24754e+08	451	50.1036	5.05908
M0R757	Protein LOC100360413 OS=Rattus norvegicus GN=LOC100360413 PE=4 SV=1 - [M0R757_RAT]	254.996	29	7	6	13	99	2.47732e+08	462	50.0761	9.01221
Q6AYZ1	Tubulin alpha-1C chain OS=Rattus norvegicus GN=Tuba1c PE=1 SV=1 - [TBA1C_RAT]	242.99	41.2	3	1	16	92	1.24754e+08	449	49.9055	5.09717
Q4QRB4	Tubulin beta-3 chain OS=Rattus norvegicus GN=Tubb3 PE=1 SV=1 - [TBB3_RAT]	228.057	36.22	2	2	15	74	4.2389e+07	450	50.3862	4.93213
P11980-2	Isoform M2 of Pyruvate kinase isozymes M1/M2 OS=Rattus norvegicus GN=Pkm - [KPYM_RAT]	226.591	44.44	11	1	21	96	6.32646e+07	531	57.744	7.44482
P11980	Pyruvate kinase isozymes M1/M2 OS=Rattus norvegicus GN=Pkm PE=1 SV=3 - [KPYM_RAT]	220.663	43.88	7	1	21	96	6.32646e+07	531	57.7809	7.06396
G3V6D3	ATP synthase subunit beta OS=Rattus norvegicus GN=Atp5b PE=3 SV=1 - [G3V6D3_RAT]	212.664	45.37	3	19	19	75	4.51398e+07	529	56.3095	5.2749
Q5XIF6	Tubulin alpha-4A chain OS=Rattus norvegicus GN=Tuba4a PE=2 SV=1 - [TBA4A_RAT]	180.632	31.47	2	1	13	70	1.04437e+08	448	49.8924	5.05908
Q62950	Dihydropyrimidinase-related protein 1 OS=Rattus norvegicus GN=Crmp1 PE=1 SV=1 - [DPYL1_RAT]	180.592	26.57	1	9	13	61	7.69637e+07	572	62.1566	7.12256
P18666	Myosin regulatory light chain 12B OS=Rattus norvegicus GN=Myl12b PE=1 SV=3 - [ML12B_RAT]	178.374	51.16	4	2	9	75	1.62213e+08	172	19.8256	4.90674
F1LP05	ATP synthase subunit alpha OS=Rattus norvegicus GN=Atp5a1 PE=2 SV=1 - [F1LP05_RAT]	163.088	30.38	3	16	16	72	5.32866e+07	553	59.7757	9.26123
P52873	Pyruvate carboxylase, mitochondrial OS=Rattus norvegicus GN=Pc PE=1 SV=2 - [PYC_RAT]	158.691	23.85	1	24	24	60	1.8953e+07	1178	129.695	6.81494
P62632	Elongation factor 1-alpha 2 OS=Rattus norvegicus GN=Eef1a2 PE=2 SV=1 - [EF1A2_RAT]	155.064	22.25	1	3	10	62	2.47732e+08	463	50.4223	9.02686
P13832	Myosin regulatory light chain RLC-A OS=Rattus norvegicus GN=Rlc-a PE=2 SV=2 - [MRLCA_RAT]	153.912	51.16	1	1	8	61	1.62213e+08	172	19.8825	4.80518
Q64119	Myosin light polypeptide 6 OS=Rattus norvegicus GN=Myl6 PE=1 SV=3 - [MYL6_RAT]	151.781	58.28	7	8	9	56	1.96621e+08	151	16.9641	4.55127
D3ZRN3	Protein Actbl2 OS=Rattus norvegicus GN=Actbl2 PE=3 SV=1 - [D3ZRN3_RAT]	151.656	22.61	2	2	9	91	4.62964e+08	376	41.9359	5.49072
Q4QQV0	Protein Tubb6 OS=Rattus norvegicus GN=Tubb6 PE=2 SV=1 - [Q4QQV0_RAT]	137.874	35.79	2	5	15	59	4.5497e+07	447	50.0271	4.89404
P06761	78 kDa glucose-regulated protein OS=Rattus norvegicus GN=Hspa5 PE=1 SV=1 - [GRP78_RAT]	133.703	34.86	1	16	18	45	3.48879e+07	654	72.3024	5.16064
P06685	Sodium/potassium-transporting ATPase subunit alpha-1 OS=Rattus norvegicus GN=Atp1a1 PE=1 SV=1 - [AT1A1_RAT]	131.067	24.05	11	23	23	55	1.3517e+07	1023	112.982	5.45264
P04177	Tyrosine 3-monooxygenase OS=Rattus norvegicus GN=Th PE=1 SV=3 - [TY3H_RAT]	130.972	22.69	2	13	13	59	4.96333e+07	498	55.9313	6.11279
P62909	40S ribosomal protein S3 OS=Rattus norvegicus GN=Rps3 PE=1 SV=1 - [RS3_RAT]	123.697	59.26	2	15	15	50	3.69948e+07	243	26.6574	9.65674
P04182	Ornithine aminotransferase, mitochondrial OS=Rattus norvegicus GN=Oat PE=1 SV=1 - [OAT_RAT]	123.47	34.62	2	8	15	58	3.09885e+07	439	48.302	6.99072
Q64428	Trifunctional enzyme subunit alpha, mitochondrial OS=Rattus norvegicus GN=Hadha PE=1 SV=2 - [ECHA_RAT]	118.804	22.67	1	15	15	38	3.76786e+07	763	82.6125	9.05615
G3V9G4	ATP citrate lyase, isoform CRA_b OS=Rattus norvegicus GN=Acly PE=4 SV=1 - [G3V9G4_RAT]	118.165	22.82	5	23	23	54	1.33929e+07	1091	119.637	7.44482
Q68FS4-2	Isoform 2 of Cytosol aminopeptidase OS=Rattus norvegicus GN=Lap3 - [AMPL_RAT]	117.226	45.08	3	17	17	41	3.27706e+07	488	52.7258	6.63916
Q63610	Tropomyosin alpha-3 chain OS=Rattus norvegicus GN=Tpm3 PE=1 SV=2 - [TPM3_RAT]	116.508	31.85	1	2	12	40	3.30121e+07	248	28.9887	4.77979
P00507	Aspartate aminotransferase, mitochondrial OS=Rattus norvegicus GN=Got2 PE=1 SV=2 - [AATM_RAT]	113.08	39.53	3	17	17	48	3.62251e+07	430	47.2841	8.99756
Q63610-3	Isoform 3 of Tropomyosin alpha-3 chain OS=Rattus norvegicus GN=Tpm3 - [TPM3_RAT]	109.364	31.58	2	1	11	37	3.30121e+07	247	28.6918	4.79248
P04797	Glyceraldehyde-3-phosphate dehydrogenase OS=Rattus norvegicus GN=Gapdh PE=1 SV=3 - [G3P_RAT]	108.903	34.53	50	9	9	40	5.40798e+07	333	35.8052	8.03076
P05065	Fructose-bisphosphate aldolase A OS=Rattus norvegicus GN=Aldoa PE=1 SV=2 - [ALDOA_RAT]	106.456	35.71	4	12	13	44	4.0271e+07	364	39.3273	8.08936
P04642	L-lactate dehydrogenase A chain OS=Rattus norvegicus GN=Ldha PE=1 SV=1 - [LDHA_RAT]	104.044	40.06	10	15	15	54	8.83425e+07	332	36.4273	8.26514
P23358	60S ribosomal protein L12 OS=Rattus norvegicus GN=Rpl12 PE=2 SV=1 - [RL12_RAT]	103.428	45.45	6	5	5	35	3.6501e+07	165	17.8346	9.42236
B2GUZ5	F-actin-capping protein subunit alpha-1 OS=Rattus norvegicus GN=Capza1 PE=1 SV=1 - [CAZA1_RAT]	100.514	39.86	1	8	9	32	1.76586e+07	286	32.8893	5.69385
F1LTQ2	Uncharacterized protein (Fragment) OS=Rattus norvegicus PE=3 SV=1 - [F1LTQ2_RAT]	96.2072	11.36	1	1	3	39	1.19748e+08	308	34.41	5.50342
Q63355	Unconventional myosin-Ic OS=Rattus norvegicus GN=Myo1c PE=2 SV=2 - [MYO1C_RAT]	94.6257	21.17	1	19	19	37	6.60858e+06	1044	119.737	9.39307
P68255	14-3-3 protein theta OS=Rattus norvegicus GN=Ywhaq PE=1 SV=1 - [1433T_RAT]	92.4194	40.82	18	8	11	33	3.85116e+07	245	27.7608	4.77979
Q5XI32	F-actin-capping protein subunit beta OS=Rattus norvegicus GN=Capzb PE=1 SV=1 - [CAPZB_RAT]	90.931	37.5	1	13	13	40	2.05475e+07	272	30.6094	5.99854
F1M779	Clathrin heavy chain 1 OS=Rattus norvegicus GN=Cltc PE=2 SV=1 - [F1M779_RAT]	90.7265	14.03	2	21	21	42	5.55192e+06	1675	191.438	5.69385
P19804	Nucleoside diphosphate kinase B OS=Rattus norvegicus GN=Nme2 PE=1 SV=1 - [NDKB_RAT]	89.9118	50.66	4	2	7	42	4.20995e+07	152	17.2719	7.44482
D4ACB8	Chaperonin subunit 8 (Theta) (Predicted), isoform CRA_a OS=Rattus norvegicus GN=Cct8 PE=3 SV=1 - [D4ACB8_RAT]	89.0709	40.15	1	20	20	40	1.33622e+07	548	59.5505	5.5415
Q9ER24	Ataxin-10 OS=Rattus norvegicus GN=Atxn10 PE=1 SV=1 - [ATX10_RAT]	88.885	30.95	1	13	13	34	8.45391e+06	475	53.6925	5.14795
Q6P502	T-complex protein 1 subunit gamma OS=Rattus norvegicus GN=Cct3 PE=1 SV=1 - [TCPG_RAT]	87.1942	30.64	3	17	17	35	8.88788e+06	545	60.6084	6.63916
Q60587	Trifunctional enzyme subunit beta, mitochondrial OS=Rattus norvegicus GN=Hadhb PE=1 SV=1 - [ECHB_RAT]	87.0689	26.53	3	14	14	40	2.76058e+07	475	51.3815	9.46631
P63039	60 kDa heat shock protein, mitochondrial OS=Rattus norvegicus GN=Hspd1 PE=1 SV=1 - [CH60_RAT]	86.073	29.14	4	13	13	35	1.27447e+07	573	60.9174	6.17627
P82995	Heat shock protein HSP 90-alpha OS=Rattus norvegicus GN=Hsp90aa1 PE=1 SV=3 - [HS90A_RAT]	85.2523	23.6	8	8	17	34	1.30443e+07	733	84.7618	5.0083
Q05982	Nucleoside diphosphate kinase A OS=Rattus norvegicus GN=Nme1 PE=1 SV=1 - [NDKA_RAT]	85.0717	50.66	3	2	7	36	4.20995e+07	152	17.1818	6.32861
F1M953	Stress-70 protein, mitochondrial OS=Rattus norvegicus GN=Hspa9 PE=2 SV=1 - [F1M953_RAT]	84.863	28.28	3	15	15	32	7.73485e+06	679	73.6988	6.16357
F1LPL7	Protein LOC100912427 OS=Rattus norvegicus GN=LOC100912427 PE=2 SV=1 - [F1LPL7_RAT]	84.5589	38.51	11	5	8	27	7.92575e+06	322	35.6555	9.77393
P27605	Hypoxanthine-guanine phosphoribosyltransferase OS=Rattus norvegicus GN=Hprt1 PE=1 SV=1 - [HPRT_RAT]	84.3531	51.38	3	9	9	35	1.81611e+07	218	24.4615	6.53662
P34058	Heat shock protein HSP 90-beta OS=Rattus norvegicus GN=Hsp90ab1 PE=1 SV=4 - [HS90B_RAT]	83.6519	27.49	10	10	19	38	1.55683e+07	724	83.2291	5.03369
G3V913	Heat shock 27kDa protein 1 OS=Rattus norvegicus GN=Hspb1 PE=3 SV=1 - [G3V913_RAT]	81.8185	37.38	2	8	8	32	1.18097e+08	206	22.7935	6.21436
P68511	14-3-3 protein eta OS=Rattus norvegicus GN=Ywhah PE=1 SV=2 - [1433F_RAT]	79.8088	32.52	4	6	9	32	3.87996e+07	246	28.194	4.89404
P63245	Guanine nucleotide-binding protein subunit beta-2-like 1 OS=Rattus norvegicus GN=Gnb2l1 PE=1 SV=3 - [GBLP_RAT]	74.6406	41.32	1	11	11	26	1.67632e+07	317	35.0546	7.69385
Q4FZX7	Signal recognition particle receptor subunit beta OS=Rattus norvegicus GN=Srprb PE=2 SV=1 - [SRPRB_RAT]	74.6297	58.36	3	14	14	29	9.80303e+06	269	29.5506	9.27588
Q7TPB1	T-complex protein 1 subunit delta OS=Rattus norvegicus GN=Cct4 PE=1 SV=3 - [TCPD_RAT]	73.5592	29.87	1	14	15	31	9.68317e+06	539	58.0628	8.01611
Q6LDP3	Rat glutathione S-transferase OS=Rattus norvegicus GN=Gstm1 PE=2 SV=1 - [Q6LDP3_RAT]	73.3238	43.06	7	3	10	30	4.0376e+07	216	25.669	8.19189
P62260	14-3-3 protein epsilon OS=Rattus norvegicus GN=Ywhae PE=1 SV=1 - [1433E_RAT]	72.9458	40.39	2	10	12	33	3.26415e+07	255	29.1554	4.7417
P22288	GTP cyclohydrolase 1 OS=Rattus norvegicus GN=Gch1 PE=1 SV=1 - [GCH1_RAT]	72.3068	35.27	2	10	10	34	2.91296e+07	241	27.0399	8.27979
P23514	Coatomer subunit beta OS=Rattus norvegicus GN=Copb1 PE=1 SV=1 - [COPB_RAT]	70.3289	19.94	1	16	16	33	8.10509e+06	953	106.943	5.96045
Q68FR6	Elongation factor 1-gamma OS=Rattus norvegicus GN=Eef1g PE=1 SV=3 - [EF1G_RAT]	69.7112	27.46	3	13	13	44	1.70648e+07	437	50.0292	6.7417
P38983	40S ribosomal protein SA OS=Rattus norvegicus GN=Rpsa PE=1 SV=3 - [RSSA_RAT]	67.6658	25.42	2	7	7	21	2.9449e+07	295	32.8034	4.86865
P70566	Tropomodulin-2 OS=Rattus norvegicus GN=Tmod2 PE=1 SV=1 - [TMOD2_RAT]	66.9693	32.19	3	10	10	23	1.63513e+07	351	39.4676	5.42725
F1LRT9	Cytoplasmic dynein 1 heavy chain 1 OS=Rattus norvegicus GN=Dync1h1 PE=2 SV=2 - [F1LRT9_RAT]	66.6943	6.12	3	27	27	35	2.07963e+06	4643	531.345	6.48096
F1LND7	Farnesyl pyrophosphate synthase OS=Rattus norvegicus GN=Fdps PE=2 SV=2 - [F1LND7_RAT]	66.551	25.78	7	9	9	28	1.02202e+07	353	40.7869	5.64307
Q6IMF3	Keratin, type II cytoskeletal 1 OS=Rattus norvegicus GN=Krt1 PE=2 SV=1 - [K2C1_RAT]	66.0415	8.32	5	5	6	24	4.74392e+07	625	64.7911	7.86963
P84082	ADP-ribosylation factor 2 OS=Rattus norvegicus GN=Arf2 PE=2 SV=1 - [ARF2_RAT]	66.0368	42.54	4	5	8	31	3.04481e+07	181	20.7328	6.58057
Q5U3Z7	Serine hydroxymethyltransferase OS=Rattus norvegicus GN=Shmt2 PE=2 SV=1 - [Q5U3Z7_RAT]	64.9879	30.95	1	14	15	28	1.89947e+07	504	55.7296	8.20654
P04906	Glutathione S-transferase P OS=Rattus norvegicus GN=Gstp1 PE=1 SV=2 - [GSTP1_RAT]	64.5535	46.67	3	7	7	23	9.79466e+06	210	23.4241	7.35693
D4AC23	Protein Cct7 OS=Rattus norvegicus GN=Cct7 PE=3 SV=1 - [D4AC23_RAT]	64.2328	34.74	1	19	19	38	8.52106e+06	544	59.6202	8.00146
Q9EPH8	Polyadenylate-binding protein 1 OS=Rattus norvegicus GN=Pabpc1 PE=2 SV=1 - [PABP1_RAT]	64.0551	23.58	10	14	14	27	9.36848e+06	636	70.6559	9.49561
D3ZWT8	Uncharacterized protein OS=Rattus norvegicus GN=Atp5h PE=4 SV=2 - [D3ZWT8_RAT]	63.9445	43.31	5	6	6	23	2.15503e+07	127	14.5505	8.55811
P04636	Malate dehydrogenase, mitochondrial OS=Rattus norvegicus GN=Mdh2 PE=1 SV=2 - [MDHM_RAT]	63.4624	37.87	2	11	11	24	1.01422e+07	338	35.6608	8.67529
P63102	14-3-3 protein zeta/delta OS=Rattus norvegicus GN=Ywhaz PE=1 SV=1 - [1433Z_RAT]	62.9038	25.31	1	4	7	24	3.12404e+07	245	27.7537	4.79248
P35213-2	Isoform Short of 14-3-3 protein beta/alpha OS=Rattus norvegicus GN=Ywhab - [1433B_RAT]	61.835	33.61	5	4	7	25	3.54569e+07	244	27.8047	4.88135
F1LMZ8	26S proteasome non-ATPase regulatory subunit 11 OS=Rattus norvegicus GN=Psmd11 PE=2 SV=2 - [PSD11_RAT]	61.4428	26.78	3	10	10	24	2.25896e+06	422	47.434	6.48096
Q09073	ADP/ATP translocase 2 OS=Rattus norvegicus GN=Slc25a5 PE=1 SV=3 - [ADT2_RAT]	61.3463	35.57	5	5	12	38	5.21812e+07	298	32.8801	9.72998
G3V679	Transferrin receptor protein 1 OS=Rattus norvegicus GN=Tfrc PE=4 SV=1 - [G3V679_RAT]	59.6796	17.48	2	12	12	23	4.33749e+06	761	85.8223	6.17627
P84083	ADP-ribosylation factor 5 OS=Rattus norvegicus GN=Arf5 PE=1 SV=2 - [ARF5_RAT]	58.7506	40	4	3	7	27	4.23465e+07	180	20.5166	6.78564
P28480	T-complex protein 1 subunit alpha OS=Rattus norvegicus GN=Tcp1 PE=1 SV=1 - [TCPA_RAT]	58.5955	26.98	1	14	14	26	8.53847e+06	556	60.3217	6.21436
Q05962	ADP/ATP translocase 1 OS=Rattus norvegicus GN=Slc25a4 PE=1 SV=3 - [ADT1_RAT]	58.2184	36.24	3	5	12	33	5.54096e+07	298	32.9682	9.78857
P09495	Tropomyosin alpha-4 chain OS=Rattus norvegicus GN=Tpm4 PE=1 SV=3 - [TPM4_RAT]	58.0723	24.19	4	6	9	26	2.22287e+07	248	28.4925	4.69092
Q63009	Protein arginine N-methyltransferase 1 OS=Rattus norvegicus GN=Prmt1 PE=1 SV=1 - [ANM1_RAT]	57.8854	27.2	2	11	11	24	4.92629e+06	353	40.496	5.60498
O35142	Coatomer subunit beta' OS=Rattus norvegicus GN=Copb2 PE=1 SV=3 - [COPB2_RAT]	57.6721	10.83	3	9	9	24	5.85552e+06	905	102.486	5.2749
P52555	Endoplasmic reticulum resident protein 29 OS=Rattus norvegicus GN=Erp29 PE=1 SV=2 - [ERP29_RAT]	57.0806	27.69	2	6	6	20	5.62125e+06	260	28.5569	6.62451
D3ZHA7	Protein Myl6b OS=Rattus norvegicus GN=LOC684533 PE=4 SV=1 - [D3ZHA7_RAT]	56.7466	45.41	2	8	9	22	1.2115e+08	207	22.7927	5.70654
Q6P7A7	Dolichyl-diphosphooligosaccharide--protein glycosyltransferase subunit 1 OS=Rattus norvegicus GN=Rpn1 PE=2 SV=1 - [Q6P7A7_RAT]	56.5753	25.91	2	14	14	26	5.97266e+06	606	68.3586	6.50732
Q6IFW6	Keratin, type I cytoskeletal 10 OS=Rattus norvegicus GN=Krt10 PE=2 SV=1 - [K1C10_RAT]	55.6388	14.64	14	8	10	23	3.98901e+07	526	56.4705	5.14795
Q8VI04	Isoaspartyl peptidase/L-asparaginase OS=Rattus norvegicus GN=Asrgl1 PE=1 SV=1 - [ASGL1_RAT]	55.5697	38.14	1	12	12	25	6.28786e+06	333	34.3886	7.88428
Q07936	Annexin A2 OS=Rattus norvegicus GN=Anxa2 PE=1 SV=2 - [ANXA2_RAT]	55.2249	30.09	2	10	10	19	9.42645e+06	339	38.6538	7.69385
B0BNJ1	LOC683667 protein OS=Rattus norvegicus GN=Sri PE=2 SV=1 - [B0BNJ1_RAT]	54.8866	51.01	1	9	9	26	7.32793e+07	198	21.6103	5.89697
P04692-8	Isoform 8 of Tropomyosin alpha-1 chain OS=Rattus norvegicus GN=Tpm1 - [TPM1_RAT]	54.8345	24.6	15	4	8	24	2.03417e+07	248	28.7006	4.84326
Q4V7C7	Actin-related protein 3 OS=Rattus norvegicus GN=Actr3 PE=1 SV=1 - [ARP3_RAT]	54.0297	22.01	3	8	8	26	8.96888e+06	418	47.327	5.88428
P62944	AP-2 complex subunit beta OS=Rattus norvegicus GN=Ap2b1 PE=1 SV=1 - [AP2B1_RAT]	53.2465	16.44	2	5	14	25	4.08034e+06	937	104.486	5.37646
P61983	14-3-3 protein gamma OS=Rattus norvegicus GN=Ywhag PE=1 SV=2 - [1433G_RAT]	52.6023	24.29	4	3	6	20	3.97465e+07	247	28.2849	4.89404
D3ZZK1	Protein LOC100359563 OS=Rattus norvegicus GN=LOC100359563 PE=4 SV=1 - [D3ZZK1_RAT]	52.3873	30.25	7	3	4	20	2.2685e+07	119	13.3453	9.80322
Q68FX0	Isocitrate dehydrogenase [NAD] subunit beta, mitochondrial OS=Rattus norvegicus GN=Idh3B PE=1 SV=1 - [IDH3B_RAT]	52.1521	29.09	2	10	10	23	1.10816e+07	385	42.3268	8.74854
Q6P9V7	Proteasome (Prosome, macropain) activator subunit 1 OS=Rattus norvegicus GN=Psme1 PE=2 SV=1 - [Q6P9V7_RAT]	51.1527	38.55	3	8	8	18	9.43788e+06	249	28.617	5.80811
D4A6G6	Protein LOC100362339 OS=Rattus norvegicus GN=LOC100362339 PE=4 SV=1 - [D4A6G6_RAT]	50.5042	51.72	10	10	10	26	4.48403e+07	145	16.1076	10.4038
Q63396	Activated RNA polymerase II transcriptional coactivator p15 OS=Rattus norvegicus GN=Sub1 PE=2 SV=3 - [TCP4_RAT]	50.3796	52.76	1	7	7	20	1.87928e+07	127	14.4324	9.59814
P11507-2	Isoform SERCA2A of Sarcoplasmic/endoplasmic reticulum calcium ATPase 2 OS=Rattus norvegicus GN=Atp2a2 - [AT2A2_RAT]	49.6227	9.93	12	9	9	22	3.13536e+06	997	109.61	5.36377
D3ZEN5	Peroxiredoxin-5, mitochondrial (Fragment) OS=Rattus norvegicus GN=Prdx5 PE=2 SV=2 - [D3ZEN5_RAT]	48.8856	42.86	3	7	7	20	7.13991e+06	161	16.9149	7.23975
P19945	60S acidic ribosomal protein P0 OS=Rattus norvegicus GN=Rplp0 PE=1 SV=2 - [RLA0_RAT]	48.0833	25.87	4	7	7	21	2.47332e+07	317	34.1938	6.25244
P85834	Elongation factor Tu, mitochondrial OS=Rattus norvegicus GN=Tufm PE=1 SV=1 - [EFTU_RAT]	48.0113	29.42	5	13	14	22	1.02096e+07	452	49.491	7.56201
Q63716	Peroxiredoxin-1 OS=Rattus norvegicus GN=Prdx1 PE=1 SV=1 - [PRDX1_RAT]	47.4235	41.71	1	6	8	21	3.71342e+07	199	22.0953	8.1333
P19511	ATP synthase subunit b, mitochondrial OS=Rattus norvegicus GN=Atp5f1 PE=1 SV=1 - [AT5F1_RAT]	47.196	20.31	1	5	5	21	1.23164e+07	256	28.8505	9.36377
P61751	ADP-ribosylation factor 4 OS=Rattus norvegicus GN=Arf4 PE=2 SV=2 - [ARF4_RAT]	46.6605	38.33	4	3	7	27	4.51985e+07	180	20.3836	7.13721
Q9QX69	LanC-like protein 1 OS=Rattus norvegicus GN=Lancl1 PE=2 SV=2 - [LANC1_RAT]	46.3645	20.05	2	6	6	15	5.23696e+06	399	45.2105	7.6499
Q6AY23	Pyrroline-5-carboxylate reductase 2 OS=Rattus norvegicus GN=Pycr2 PE=2 SV=1 - [P5CR2_RAT]	46.14	30.31	1	4	7	16	9.88786e+06	320	33.6516	7.76709
P62815	V-type proton ATPase subunit B, brain isoform OS=Rattus norvegicus GN=Atp6v1b2 PE=1 SV=1 - [VATB2_RAT]	45.8614	19.57	2	8	8	19	5.08331e+06	511	56.5149	5.80811
Q32Q88	F-box protein 22 OS=Rattus norvegicus GN=Fbxo22 PE=2 SV=1 - [Q32Q88_RAT]	45.1638	29.82	1	12	12	21	1.04672e+07	399	43.9806	7.95752
Q9Z0V5	Peroxiredoxin-4 OS=Rattus norvegicus GN=Prdx4 PE=2 SV=1 - [PRDX4_RAT]	44.7113	27.84	1	5	7	18	2.12435e+07	273	30.9881	6.65381
Q68FQ0	T-complex protein 1 subunit epsilon OS=Rattus norvegicus GN=Cct5 PE=1 SV=1 - [TCPE_RAT]	44.4147	21.63	2	11	12	26	9.57998e+06	541	59.4988	5.71924
Q4V7E8	Leucine-rich repeat flightless-interacting protein 2 OS=Rattus norvegicus GN=Lrrfip2 PE=2 SV=1 - [LRRF2_RAT]	44.4014	18.99	2	7	7	15	3.43166e+06	437	49.7422	5.94775
F1LQ81	Vesicle-fusing ATPase (Fragment) OS=Rattus norvegicus GN=Nsf PE=2 SV=2 - [F1LQ81_RAT]	44.2035	20.05	4	14	14	21	7.30289e+06	743	82.5929	6.72705
Q6TXE9	LRRGT00050 OS=Rattus norvegicus GN=Eprs PE=2 SV=1 - [Q6TXE9_RAT]	43.8534	9.35	2	11	11	16	2.26035e+06	1486	166.676	7.50342
P08009	Glutathione S-transferase Yb-3 OS=Rattus norvegicus GN=Gstm3 PE=1 SV=2 - [GSTM4_RAT]	43.708	21.56	5	1	6	19	3.00232e+07	218	25.664	7.32764
P07825	Synaptophysin OS=Rattus norvegicus GN=Syp PE=1 SV=1 - [SYPH_RAT]	43.6759	9.77	1	3	3	18	2.5282e+07	307	33.2891	5.021
Q6IFV1	Keratin, type I cytoskeletal 14 OS=Rattus norvegicus GN=Krt14 PE=2 SV=1 - [K1C14_RAT]	43.5944	11.34	19	2	7	20	2.61135e+07	485	52.6509	5.16064
Q66HF1	NADH-ubiquinone oxidoreductase 75 kDa subunit, mitochondrial OS=Rattus norvegicus GN=Ndufs1 PE=1 SV=1 - [NDUS1_RAT]	42.6505	18.29	1	11	11	16	3.5321e+06	727	79.3616	5.89697
G3V8T4	DNA damage-binding protein 1 OS=Rattus norvegicus GN=Ddb1 PE=4 SV=1 - [G3V8T4_RAT]	42.5055	12.37	2	13	13	22	7.31975e+06	1140	126.86	5.26221
P32551	Cytochrome b-c1 complex subunit 2, mitochondrial OS=Rattus norvegicus GN=Uqcrc2 PE=1 SV=2 - [QCR2_RAT]	42.2875	21.9	1	8	8	15	3.07874e+06	452	48.3662	9.14404
Q63569	26S protease regulatory subunit 6A OS=Rattus norvegicus GN=Psmc3 PE=2 SV=1 - [PRS6A_RAT]	42.1543	25.06	2	11	11	21	3.40616e+06	439	49.1294	5.23682
Q06647	ATP synthase subunit O, mitochondrial OS=Rattus norvegicus GN=Atp5o PE=1 SV=1 - [ATPO_RAT]	42.0381	33.8	1	7	7	18	2.8006e+07	213	23.3828	10.0229
D3ZJX5	Protein LOC687295 OS=Rattus norvegicus GN=LOC687295 PE=4 SV=2 - [D3ZJX5_RAT]	41.984	22.66	1	7	7	16	9.63066e+06	353	39.8297	8.1333
Q6AYT3	tRNA-splicing ligase RtcB homolog OS=Rattus norvegicus PE=2 SV=1 - [RTCB_RAT]	41.8763	18.61	2	8	8	17	5.71272e+06	505	55.2139	7.2251
P40329	Arginine--tRNA ligase, cytoplasmic OS=Rattus norvegicus GN=Rars PE=1 SV=2 - [SYRC_RAT]	41.2271	20	1	11	11	20	2.69312e+06	660	75.762	7.04932
P52925	High mobility group protein B2 OS=Rattus norvegicus GN=Hmgb2 PE=2 SV=2 - [HMGB2_RAT]	40.9535	22.38	3	5	6	15	1.04845e+07	210	24.1438	7.38623
P35435	ATP synthase subunit gamma, mitochondrial OS=Rattus norvegicus GN=Atp5c1 PE=1 SV=2 - [ATPG_RAT]	40.1908	24.18	4	6	6	18	1.14039e+07	273	30.1717	8.83643
G3V6H0	Protein LOC100363782 OS=Rattus norvegicus GN=LOC100363782 PE=3 SV=1 - [G3V6H0_RAT]	40.1873	40.8	18	2	8	23	2.47165e+07	201	22.1632	5.73193
Q6AYK3	Inositol-3-phosphate synthase 1 OS=Rattus norvegicus GN=Isyna1 PE=3 SV=2 - [INO1_RAT]	39.6592	16.88	1	9	9	19	6.61614e+06	557	60.8451	6.03662
Q7M0E3	Destrin OS=Rattus norvegicus GN=Dstn PE=1 SV=3 - [DEST_RAT]	39.6316	30.91	2	6	6	17	1.26423e+07	165	18.5215	8.03076
G3V9N8	AP-1 complex subunit beta-1 OS=Rattus norvegicus GN=Ap1b1 PE=4 SV=2 - [G3V9N8_RAT]	38.89	16.24	3	5	14	21	3.99554e+06	942	103.758	5.17334
F1M0B2	Protein LOC683295 (Fragment) OS=Rattus norvegicus GN=LOC683295 PE=4 SV=2 - [F1M0B2_RAT]	38.5683	5.42	8	1	3	13	2.27587e+07	535	57.715	7.88428
P04961	Proliferating cell nuclear antigen OS=Rattus norvegicus GN=Pcna PE=1 SV=1 - [PCNA_RAT]	38.4966	30.27	1	7	7	16	1.00486e+07	261	28.7303	4.69092
O08651	D-3-phosphoglycerate dehydrogenase OS=Rattus norvegicus GN=Phgdh PE=1 SV=3 - [SERA_RAT]	38.3145	18.76	3	9	9	14	4.43606e+06	533	56.4572	6.7124
Q5RK08	Glioblastoma amplified sequence OS=Rattus norvegicus GN=Gbas PE=2 SV=1 - [Q5RK08_RAT]	37.8534	24.91	6	8	8	17	1.49463e+07	281	32.9209	9.36377
P50137	Transketolase OS=Rattus norvegicus GN=Tkt PE=1 SV=1 - [TKT_RAT]	37.4506	18.14	4	10	10	18	1.22787e+07	623	67.6006	7.48877
M0RD20	Calpain small subunit 1 OS=Rattus norvegicus GN=Capns1 PE=4 SV=1 - [M0RD20_RAT]	37.197	23.87	2	6	6	15	1.20423e+07	243	25.4304	5.42725
D4A9T3	Protein Hmg1l1 OS=Rattus norvegicus GN=Hmg1l1 PE=4 SV=2 - [D4A9T3_RAT]	36.6646	26.76	24	5	6	15	6.00591e+06	213	24.6621	6.15088
O88989	Malate dehydrogenase, cytoplasmic OS=Rattus norvegicus GN=Mdh1 PE=1 SV=3 - [MDHC_RAT]	36.5878	16.77	1	5	5	14	6.02658e+06	334	36.46	6.58057
P39951	Cyclin-dependent kinase 1 OS=Rattus norvegicus GN=Cdk1 PE=1 SV=1 - [CDK1_RAT]	36.5671	33	46	6	9	16	1.00369e+07	297	34.113	8.41162
D4A0L4	DNA-binding protein A OS=Rattus norvegicus GN=Csda PE=2 SV=2 - [D4A0L4_RAT]	36.2756	14.38	9	1	4	13	6.54743e+06	292	30.7935	9.62744
Q5XIM9	T-complex protein 1 subunit beta OS=Rattus norvegicus GN=Cct2 PE=1 SV=3 - [TCPB_RAT]	35.6032	14.39	1	7	7	15	9.19731e+06	535	57.4221	6.45557
Q6AXW2	Protein Tmod3 OS=Rattus norvegicus GN=Tmod3 PE=2 SV=1 - [Q6AXW2_RAT]	35.536	23.01	2	9	9	20	1.77876e+07	352	39.4471	4.89404
P62907	60S ribosomal protein L10a OS=Rattus norvegicus GN=Rpl10a PE=1 SV=2 - [RL10A_RAT]	35.4112	32.72	6	6	7	14	1.03961e+07	217	24.8155	9.93506
B5DEN5	Eukaryotic translation elongation factor 1 beta 2 OS=Rattus norvegicus GN=Eef1b2 PE=2 SV=1 - [B5DEN5_RAT]	34.6881	23.56	2	4	4	12	3.53131e+06	225	24.6603	4.71631
Q6AYK6	Calcyclin-binding protein OS=Rattus norvegicus GN=Cacybp PE=1 SV=1 - [CYBP_RAT]	34.5958	23.58	1	4	5	12	7.93636e+06	229	26.5247	7.86963
B0BMW2	3-hydroxyacyl-CoA dehydrogenase type-2 OS=Rattus norvegicus GN=Hsd17b10 PE=2 SV=1 - [B0BMW2_RAT]	34.2465	37.16	2	7	7	12	8.1262e+06	261	27.2325	8.5874
F1LX07	Uncharacterized protein (Fragment) OS=Rattus norvegicus GN=LOC100360985 PE=3 SV=2 - [F1LX07_RAT]	34.2394	14.22	1	5	9	13	2.5267e+06	675	74.1807	8.74854
D4AD70	Protein RGD1561636 OS=Rattus norvegicus GN=RGD1561636 PE=3 SV=1 - [D4AD70_RAT]	34.049	48.57	5	5	5	22	4.04607e+06	70	8.24076	10.0962
Q71SY3	Translin OS=Rattus norvegicus GN=Tsn PE=2 SV=1 - [Q71SY3_RAT]	33.8709	24.56	30	7	7	15	8.3975e+06	228	26.1547	6.44287
Q6Q0N3	5'-nucleotidase domain-containing protein 2 OS=Rattus norvegicus GN=Nt5dc2 PE=2 SV=2 - [NT5D2_RAT]	33.6307	13.02	1	8	8	19	6.01654e+06	553	63.6119	7.1665
G3V741	Phosphate carrier protein, mitochondrial OS=Rattus norvegicus GN=Slc25a3 PE=3 SV=1 - [G3V741_RAT]	33.2111	16.29	3	6	6	15	1.85187e+07	356	39.5054	9.26123
P56574	Isocitrate dehydrogenase [NADP], mitochondrial OS=Rattus norvegicus GN=Idh2 PE=1 SV=2 - [IDHP_RAT]	32.9848	23.23	1	8	10	15	3.32948e+06	452	50.9349	8.68994
Q6IFU7	Keratin, type I cytoskeletal 42 OS=Rattus norvegicus GN=Krt42 PE=2 SV=1 - [K1C42_RAT]	32.5273	12.39	19	2	7	14	2.32167e+07	452	50.1819	5.16064
G3V796	Acetyl-Coenzyme A dehydrogenase, medium chain OS=Rattus norvegicus GN=Acadm PE=3 SV=1 - [G3V796_RAT]	32.424	20.9	2	8	8	14	3.39565e+06	421	46.5418	8.41162
P15791-5	Isoform Delta 5 of Calcium/calmodulin-dependent protein kinase type II subunit delta OS=Rattus norvegicus GN=Camk2d - [KCC2D_RAT]	32.3373	16.11	14	6	7	13	5.03953e+06	478	54.1565	7.12256
Q9QVC8	Peptidyl-prolyl cis-trans isomerase FKBP4 OS=Rattus norvegicus GN=Fkbp4 PE=1 SV=3 - [FKBP4_RAT]	31.944	12.23	1	5	5	13	1.70037e+06	458	51.4178	5.61768
P25235	Dolichyl-diphosphooligosaccharide--protein glycosyltransferase subunit 2 OS=Rattus norvegicus GN=Rpn2 PE=2 SV=2 - [RPN2_RAT]	31.9006	10.94	1	6	6	17	1.0043e+07	631	69.035	5.97314
P14408-2	Isoform Cytoplasmic of Fumarate hydratase, mitochondrial OS=Rattus norvegicus GN=Fh - [FUMH_RAT]	31.8387	14.99	5	6	6	12	5.64752e+06	467	50.1377	8.19189
P21670	Proteasome subunit alpha type-4 OS=Rattus norvegicus GN=Psma4 PE=1 SV=1 - [PSA4_RAT]	31.8268	22.99	2	6	6	14	8.13015e+06	261	29.4792	7.72314
P81795	Eukaryotic translation initiation factor 2 subunit 3 OS=Rattus norvegicus GN=Eif2s3 PE=1 SV=2 - [IF2G_RAT]	31.4443	22.88	3	9	9	16	3.02131e+06	472	51.0472	8.39697
Q6PEC4	S-phase kinase-associated protein 1 OS=Rattus norvegicus GN=Skp1 PE=2 SV=3 - [SKP1_RAT]	31.3932	29.45	1	5	5	12	1.00837e+07	163	18.6603	4.53857
P61980	Heterogeneous nuclear ribonucleoprotein K OS=Rattus norvegicus GN=Hnrnpk PE=1 SV=1 - [HNRPK_RAT]	31.0064	14.9	3	6	6	12	2.59646e+06	463	50.9444	5.5415
P10860	Glutamate dehydrogenase 1, mitochondrial OS=Rattus norvegicus GN=Glud1 PE=1 SV=2 - [DHE3_RAT]	30.9604	15.59	3	8	8	12	6.48194e+06	558	61.3773	8.00146
D3ZZ99	Alpha-adducin OS=Rattus norvegicus GN=Add1 PE=2 SV=2 - [D3ZZ99_RAT]	30.7376	15.21	3	7	7	11	4.17725e+06	631	69.6891	6.55127
D4A2D7	Importin 4 (Predicted), isoform CRA_b OS=Rattus norvegicus GN=Ipo4 PE=2 SV=2 - [D4A2D7_RAT]	30.5135	9.71	1	10	10	14	2.36308e+06	1081	118.85	5.021
O35824	DnaJ homolog subfamily A member 2 OS=Rattus norvegicus GN=Dnaja2 PE=2 SV=1 - [DNJA2_RAT]	30.5092	14.56	2	5	6	15	9.54254e+06	412	45.7366	6.48096
P63331	Serine/threonine-protein phosphatase 2A catalytic subunit alpha isoform OS=Rattus norvegicus GN=Ppp2ca PE=1 SV=1 - [PP2AA_RAT]	30.1608	22.01	2	5	6	11	2.0487e+06	309	35.5854	5.5415
M0R5G1	Uncharacterized protein OS=Rattus norvegicus PE=4 SV=1 - [M0R5G1_RAT]	30.0291	17.78	2	1	8	17	1.9047e+07	433	48.1267	7.41553
P13803	Electron transfer flavoprotein subunit alpha, mitochondrial OS=Rattus norvegicus GN=Etfa PE=1 SV=4 - [ETFA_RAT]	29.9518	19.52	7	6	6	13	3.25354e+06	333	34.9295	8.38232
P53987	Monocarboxylate transporter 1 OS=Rattus norvegicus GN=Slc16a1 PE=1 SV=1 - [MOT1_RAT]	29.9359	11.54	1	6	6	12	8.80336e+06	494	53.2034	8.32373
D3ZXI0	Pyrroline-5-carboxylate reductase OS=Rattus norvegicus GN=Pycr1 PE=3 SV=1 - [D3ZXI0_RAT]	29.9113	31.07	2	5	8	16	1.00017e+07	309	32.2058	6.84424
F1LRI5	Protein Gcn1l1 OS=Rattus norvegicus GN=Gcn1l1 PE=2 SV=2 - [F1LRI5_RAT]	29.7836	4.01	2	10	10	15	1.4371e+06	2669	292.475	7.29834
P05197	Elongation factor 2 OS=Rattus norvegicus GN=Eef2 PE=1 SV=4 - [EF2_RAT]	29.6561	14.8	4	13	13	18	7.50436e+06	858	95.2229	6.82959
Q6P6Q2	Keratin, type II cytoskeletal 5 OS=Rattus norvegicus GN=Krt5 PE=1 SV=1 - [K2C5_RAT]	29.6125	10.07	12	3	6	13	8.91978e+06	576	61.7877	7.79639
G3V9W6	Aldehyde dehydrogenase OS=Rattus norvegicus GN=Aldh3a2 PE=3 SV=1 - [G3V9W6_RAT]	29.5657	17.15	23	7	8	14	7.21774e+06	484	54.0734	7.66455
P07340	Sodium/potassium-transporting ATPase subunit beta-1 OS=Rattus norvegicus GN=Atp1b1 PE=1 SV=1 - [AT1B1_RAT]	29.5088	19.74	1	6	6	18	1.60652e+07	304	35.179	8.646
D4A3P0	Protein Ybx2 OS=Rattus norvegicus GN=Ybx2 PE=2 SV=1 - [D4A3P0_RAT]	29.4886	20.06	7	3	6	12	6.54743e+06	359	38.0715	10.7554
Q6TXG7	Serine hydroxymethyltransferase OS=Rattus norvegicus GN=Shmt1 PE=2 SV=1 - [Q6TXG7_RAT]	29.2182	9.84	2	5	6	10	1.41085e+06	681	75.3262	7.92822
G3V7L6	26S protease regulatory subunit 7 OS=Rattus norvegicus GN=Psmc2 PE=3 SV=1 - [G3V7L6_RAT]	29.1914	19.63	2	8	8	16	3.37553e+06	433	48.6031	5.94775
Q5M7U6	Actin-related protein 2 OS=Rattus norvegicus GN=Actr2 PE=1 SV=1 - [ARP2_RAT]	29.1138	23.6	2	8	9	20	2.9257e+08	394	44.7052	6.7417
Q6IFU9	Protein Krt16 OS=Rattus norvegicus GN=Krt16 PE=2 SV=1 - [Q6IFU9_RAT]	29.0959	5.83	8	1	4	13	5.67926e+06	463	50.7457	5.12256
P35565	Calnexin OS=Rattus norvegicus GN=Canx PE=1 SV=1 - [CALX_RAT]	29.009	11.51	1	6	6	13	3.97914e+06	591	67.2126	4.62744
P08010	Glutathione S-transferase Mu 2 OS=Rattus norvegicus GN=Gstm2 PE=1 SV=2 - [GSTM2_RAT]	28.9962	35.78	6	5	8	14	3.43517e+07	218	25.686	7.38623
Q9Z270	Vesicle-associated membrane protein-associated protein A OS=Rattus norvegicus GN=Vapa PE=1 SV=3 - [VAPA_RAT]	28.8211	17.67	1	3	4	11	2.15642e+06	249	27.8233	8.39697
Q3T1J1	Eukaryotic translation initiation factor 5A-1 OS=Rattus norvegicus GN=Eif5a PE=1 SV=3 - [IF5A1_RAT]	28.7419	17.53	3	3	3	12	4.91336e+06	154	16.8214	5.23682
M0R9I8	Protein LOC100364427 OS=Rattus norvegicus GN=LOC100364427 PE=4 SV=1 - [M0R9I8_RAT]	28.6718	53.79	7	7	7	15	8.6367e+06	132	14.4914	6.7417
Q5BJY9	Keratin, type I cytoskeletal 18 OS=Rattus norvegicus GN=Krt18 PE=1 SV=3 - [K1C18_RAT]	28.5359	20.8	15	7	10	15	4.49724e+07	423	47.7323	5.26221
P45592	Cofilin-1 OS=Rattus norvegicus GN=Cfl1 PE=1 SV=3 - [COF1_RAT]	28.5253	21.69	2	4	4	11	6.8573e+06	166	18.5207	8.08936
Q9WVB1	Ras-related protein Rab-6A OS=Rattus norvegicus GN=Rab6a PE=2 SV=2 - [RAB6A_RAT]	28.3184	21.63	14	3	4	14	9.1055e+06	208	23.5749	5.5415
Q63081	Protein disulfide-isomerase A6 OS=Rattus norvegicus GN=Pdia6 PE=1 SV=2 - [PDIA6_RAT]	28.2784	24.32	1	8	8	11	3.03169e+06	440	48.1433	5.13525
Q641X8	Eukaryotic translation initiation factor 3 subunit E OS=Rattus norvegicus GN=Eif3e PE=2 SV=1 - [EIF3E_RAT]	28.2013	21.8	1	9	9	18	5.02335e+06	445	52.1874	6.03662
G3V6S5	C-1-tetrahydrofolate synthase, cytoplasmic OS=Rattus norvegicus GN=Mthfd1 PE=3 SV=1 - [G3V6S5_RAT]	28.1785	10.7	4	9	9	14	1.5117e+06	935	100.902	7.41553
P23965	Enoyl-CoA delta isomerase 1, mitochondrial OS=Rattus norvegicus GN=Eci1 PE=1 SV=1 - [ECI1_RAT]	28.1437	24.91	3	6	6	13	2.22894e+06	289	32.234	9.53955
P62824	Ras-related protein Rab-3C OS=Rattus norvegicus GN=Rab3c PE=1 SV=1 - [RAB3C_RAT]	28.0461	26.43	17	4	5	11	8.58552e+06	227	25.8556	5.23682
Q9QYF3	Unconventional myosin-Va OS=Rattus norvegicus GN=Myo5a PE=1 SV=1 - [MYO5A_RAT]	28.0059	5.36	3	9	9	15	2.30841e+06	1828	211.63	8.68994
B2GV73	Actin related protein 2/3 complex, subunit 3 OS=Rattus norvegicus GN=Arpc3 PE=2 SV=1 - [B2GV73_RAT]	27.9734	23.03	1	4	4	13	8.63778e+06	178	20.5223	8.60205
P85970	Actin-related protein 2/3 complex subunit 2 OS=Rattus norvegicus GN=Arpc2 PE=1 SV=1 - [ARPC2_RAT]	27.7442	21	1	6	6	14	3.66894e+06	300	34.3695	7.35693
Q10758	Keratin, type II cytoskeletal 8 OS=Rattus norvegicus GN=Krt8 PE=1 SV=3 - [K2C8_RAT]	27.2891	18.01	9	7	9	12	9.47087e+06	483	53.9853	5.99854
Q5XI34	Protein Ppp2r1a OS=Rattus norvegicus GN=Ppp2r1a PE=2 SV=1 - [Q5XI34_RAT]	27.2166	19.35	3	9	9	16	6.66752e+06	589	65.2809	5.10986
Q6QI16	LRRGT00192 OS=Rattus norvegicus GN=RGD1304704 PE=2 SV=1 - [Q6QI16_RAT]	27.0918	22.97	3	7	7	16	1.10237e+07	296	33.8038	8.63135
Q4FZT9	26S proteasome non-ATPase regulatory subunit 2 OS=Rattus norvegicus GN=Psmd2 PE=2 SV=1 - [PSMD2_RAT]	26.9713	10.24	1	8	8	14	2.61462e+06	908	100.124	5.19873
M0R5K9	Protein LOC100912024 (Fragment) OS=Rattus norvegicus GN=LOC100912024 PE=4 SV=1 - [M0R5K9_RAT]	26.9263	35.76	8	6	6	12	9.68691e+06	151	17.6438	11.1069
M0R5J4	Uncharacterized protein OS=Rattus norvegicus PE=4 SV=1 - [M0R5J4_RAT]	26.923	19.59	9	7	7	11	1.29946e+06	434	47.0452	6.3667
Q4V8F6	Pcbp2 protein OS=Rattus norvegicus GN=Pcbp2 PE=2 SV=1 - [Q4V8F6_RAT]	26.6862	22.99	6	2	6	10	5.18966e+06	335	35.3242	8.00146
G3V7G0	Cytoplasmic dynein 1 light intermediate chain 1 OS=Rattus norvegicus GN=Dync1li1 PE=4 SV=1 - [G3V7G0_RAT]	26.0411	13.58	2	5	5	13	3.25057e+06	523	56.6351	6.29053
P15650	Long-chain specific acyl-CoA dehydrogenase, mitochondrial OS=Rattus norvegicus GN=Acadl PE=1 SV=1 - [ACADL_RAT]	26.0292	15.35	1	6	6	10	4.33558e+06	430	47.8424	7.73779
Q66H80	Coatomer subunit delta OS=Rattus norvegicus GN=Arcn1 PE=2 SV=1 - [COPD_RAT]	25.9755	13.5	1	7	7	12	3.17365e+06	511	57.1632	6.21436
G3V8T5	Protein Ruvbl2 OS=Rattus norvegicus GN=Ruvbl2 PE=4 SV=1 - [G3V8T5_RAT]	25.8614	24.41	2	9	9	11	3.25142e+06	463	51.0805	5.64307
Q9Z269	Vesicle-associated membrane protein-associated protein B OS=Rattus norvegicus GN=Vapb PE=1 SV=3 - [VAPB_RAT]	25.7518	25.93	1	3	4	10	2.25917e+06	243	26.899	7.78174
D4A0T0	Protein Ndufb10 OS=Rattus norvegicus GN=Ndufb10 PE=4 SV=1 - [D4A0T0_RAT]	25.7416	30.11	2	5	5	9	6.7464e+06	176	20.8454	7.69385
Q63798	Proteasome activator complex subunit 2 OS=Rattus norvegicus GN=Psme2 PE=2 SV=3 - [PSME2_RAT]	25.7416	18.49	2	5	5	10	4.39665e+06	238	26.84	5.71924
F1LM69	Dolichyl-diphosphooligosaccharide--protein glycosyltransferase 48 kDa subunit OS=Rattus norvegicus GN=Ddost PE=2 SV=2 - [F1LM69_RAT]	25.7326	19.95	2	9	9	13	1.15106e+07	441	48.5548	5.40186
P62634	Cellular nucleic acid-binding protein OS=Rattus norvegicus GN=Cnbp PE=2 SV=1 - [CNBP_RAT]	25.5997	19.77	1	3	3	7	1.44914e+06	177	19.4496	7.7085
P11240	Cytochrome c oxidase subunit 5A, mitochondrial OS=Rattus norvegicus GN=Cox5a PE=1 SV=1 - [COX5A_RAT]	25.4412	21.23	1	3	3	9	1.29995e+07	146	16.1193	6.53662
Q9Z1P2	Alpha-actinin-1 OS=Rattus norvegicus GN=Actn1 PE=1 SV=1 - [ACTN1_RAT]	25.3861	15.47	7	8	12	21	5.22996e+06	892	102.896	5.37646
Q6AY48	Poly(RC) binding protein 3 OS=Rattus norvegicus GN=Pcbp3 PE=2 SV=1 - [Q6AY48_RAT]	25.3852	20.69	3	1	5	10	5.18966e+06	319	33.7626	8.51416
F1LN88	Aldehyde dehydrogenase, mitochondrial OS=Rattus norvegicus GN=Aldh2 PE=2 SV=2 - [F1LN88_RAT]	25.2956	13.87	7	6	6	10	3.17887e+06	519	56.4807	7.32764
Q9JLA3	UDP-glucose:glycoprotein glucosyltransferase 1 OS=Rattus norvegicus GN=Uggt1 PE=1 SV=2 - [UGGG1_RAT]	25.1967	6.77	1	11	11	14	2.95162e+06	1551	176.32	5.65576
P62282	40S ribosomal protein S11 OS=Rattus norvegicus GN=Rps11 PE=1 SV=3 - [RS11_RAT]	24.6239	39.87	5	7	7	12	7.81136e+06	158	18.419	10.3013
G3V7G9	Eukaryotic translation initiation factor 3, subunit 6 interacting protein OS=Rattus norvegicus GN=Eif3s6ip PE=2 SV=2 - [G3V7G9_RAT]	24.5652	10.21	1	3	3	8	648280	382	45.053	9.02686
Q63377	Sodium/potassium-transporting ATPase subunit beta-3 OS=Rattus norvegicus GN=Atp1b3 PE=2 SV=1 - [AT1B3_RAT]	24.5071	15.41	1	3	3	8	1.72094e+06	279	31.8091	7.95752
Q68FU3	Electron transfer flavoprotein subunit beta OS=Rattus norvegicus GN=Etfb PE=2 SV=3 - [ETFB_RAT]	24.3644	27.84	3	7	8	14	5.30268e+06	255	27.6701	7.75244
Q5RKH2	Galactokinase 1 OS=Rattus norvegicus GN=Galk1 PE=2 SV=1 - [Q5RKH2_RAT]	24.2645	13.78	1	5	5	9	4.37461e+06	392	42.3495	5.35107
P60123	RuvB-like 1 OS=Rattus norvegicus GN=Ruvbl1 PE=1 SV=1 - [RUVB1_RAT]	24.2335	19.96	1	7	7	9	2.79537e+06	456	50.1823	6.41748
P60901	Proteasome subunit alpha type-6 OS=Rattus norvegicus GN=Psma6 PE=1 SV=1 - [PSA6_RAT]	24.0806	26.42	1	6	6	10	4.23442e+06	246	27.3818	6.75635
P13471	40S ribosomal protein S14 OS=Rattus norvegicus GN=Rps14 PE=2 SV=3 - [RS14_RAT]	23.9758	22.52	4	3	3	9	9.44712e+06	151	16.2485	10.0522
Q6IFV3	Keratin, type I cytoskeletal 15 OS=Rattus norvegicus GN=Krt15 PE=1 SV=1 - [K1C15_RAT]	23.375	11.86	16	2	6	13	4.59547e+07	447	48.8401	4.85596
Q63357	Unconventional myosin-Id OS=Rattus norvegicus GN=Myo1d PE=1 SV=3 - [MYO1D_RAT]	23.3303	10.24	1	11	11	13	2.51514e+06	1006	116.021	9.40771
Q6P6V0	Glucose-6-phosphate isomerase OS=Rattus norvegicus GN=Gpi PE=1 SV=1 - [G6PI_RAT]	23.3148	8.78	1	4	4	10	3.35116e+06	558	62.7871	7.76709
P09606	Glutamine synthetase OS=Rattus norvegicus GN=Glul PE=1 SV=3 - [GLNA_RAT]	22.9695	19.84	2	6	7	10	5.38414e+06	373	42.2403	7.07861
Q66H61	Glutaminyl-tRNA synthetase OS=Rattus norvegicus GN=Qars PE=2 SV=1 - [Q66H61_RAT]	22.6333	12.26	2	9	9	10	1.97922e+06	775	87.6448	7.31299
D3ZYS7	Protein G3bp1 OS=Rattus norvegicus GN=G3bp1 PE=2 SV=1 - [D3ZYS7_RAT]	22.6239	10.97	2	3	3	9	2.2287e+06	465	51.7548	5.59229
P13383	Nucleolin OS=Rattus norvegicus GN=Ncl PE=1 SV=3 - [NUCL_RAT]	22.4005	7.29	7	5	5	11	3.23593e+06	713	77.101	4.7417
Q6PCT9	Proteasome (Prosome, macropain) 26S subunit, non-ATPase, 6 OS=Rattus norvegicus GN=Psmd6 PE=2 SV=1 - [Q6PCT9_RAT]	22.2267	15.42	1	7	7	11	1.01511e+06	389	45.5692	5.51611
Q5FVH2	Phospholipase D3 OS=Rattus norvegicus GN=Pld3 PE=2 SV=1 - [PLD3_RAT]	22.0415	8.4	1	4	4	8	1.07496e+07	488	54.3644	6.52197
Q3T1K5	F-actin-capping protein subunit alpha-2 OS=Rattus norvegicus GN=Capza2 PE=1 SV=1 - [CAZA2_RAT]	21.9873	29.72	1	5	6	9	1.27882e+07	286	32.9466	5.84619
F1LT36	Protein RGD1564698 OS=Rattus norvegicus GN=RGD1564698 PE=4 SV=2 - [F1LT36_RAT]	21.8566	23.64	8	4	4	7	7.947e+06	165	18.8808	10.0669
P06762	Heme oxygenase 1 OS=Rattus norvegicus GN=Hmox1 PE=1 SV=1 - [HMOX1_RAT]	21.8445	24.22	1	5	5	7	1.58698e+06	289	32.9848	6.53662
P12007	Isovaleryl-CoA dehydrogenase, mitochondrial OS=Rattus norvegicus GN=Ivd PE=1 SV=2 - [IVD_RAT]	21.8342	12.97	1	5	5	9	2.86329e+06	424	46.4058	7.89893
Q99NI1	Nucleoside diphosphate kinase DR-nm23 OS=Rattus norvegicus GN=Nme3 PE=2 SV=1 - [Q99NI1_RAT]	21.8252	31.36	2	4	4	7	2.63061e+06	169	19.0769	6.34131
F1LSQ6	Proteasome subunit alpha type OS=Rattus norvegicus GN=Psma7 PE=2 SV=1 - [F1LSQ6_RAT]	21.703	22.83	5	5	5	8	7.65275e+06	254	28.3809	8.45557
B0BN81	Ribosomal protein S5, isoform CRA_b OS=Rattus norvegicus GN=Rps5 PE=2 SV=1 - [B0BN81_RAT]	21.6683	22.06	2	4	4	8	6.69492e+06	204	22.8921	9.71533
G3V8A5	Protein Vps35 OS=Rattus norvegicus GN=Vps35 PE=4 SV=1 - [G3V8A5_RAT]	21.6601	9.8	2	7	7	11	2.98315e+06	796	91.6688	5.43994
Q9QYG8	Uridine-cytidine kinase 2 OS=Rattus norvegicus GN=Uck2 PE=2 SV=2 - [UCK2_RAT]	21.641	22.22	2	4	5	11	3.65952e+06	261	29.3861	6.55127
D4A133	Protein Atp6v1a OS=Rattus norvegicus GN=Atp6v1a PE=3 SV=1 - [D4A133_RAT]	21.6225	11.99	2	7	7	12	2.67839e+06	617	68.2216	5.57959
P07335	Creatine kinase B-type OS=Rattus norvegicus GN=Ckb PE=1 SV=2 - [KCRB_RAT]	21.5151	14.96	1	4	4	7	2.7444e+06	381	42.6983	5.66846
Q498R3	DnaJ homolog subfamily C member 10 OS=Rattus norvegicus GN=Dnajc10 PE=2 SV=2 - [DJC10_RAT]	21.4151	11.6	1	8	8	10	3.21943e+06	793	90.6893	7.13721
Q66HA8	Heat shock protein 105 kDa OS=Rattus norvegicus GN=Hsph1 PE=1 SV=1 - [HS105_RAT]	21.3683	8.51	1	6	6	9	1.47076e+06	858	96.3574	5.5542
P11598	Protein disulfide-isomerase A3 OS=Rattus norvegicus GN=Pdia3 PE=1 SV=2 - [PDIA3_RAT]	21.2733	18.02	1	7	8	13	1.55616e+07	505	56.5877	6.21436
Q7TP15	S-methyl-5'-thioadenosine phosphorylase OS=Rattus norvegicus GN=Mtap PE=2 SV=1 - [Q7TP15_RAT]	21.177	15.35	1	5	5	11	5.2507e+06	391	43.052	8.1333
D4AE02	Uncharacterized protein OS=Rattus norvegicus GN=Fam98b PE=4 SV=2 - [D4AE02_RAT]	21.0199	17.4	1	6	6	9	3.34072e+06	431	46.2673	8.14795
Q6IRK8	Spna2 protein OS=Rattus norvegicus GN=Sptan1 PE=2 SV=1 - [Q6IRK8_RAT]	21.0168	3.18	4	7	7	11	1.05463e+06	2452	282.206	5.31299
Q6TUG0	DnaJ homolog subfamily B member 11 OS=Rattus norvegicus GN=Dnajb11 PE=2 SV=1 - [DJB11_RAT]	21.0155	14.53	1	5	5	8	3.31038e+06	358	40.4697	6.31592
Q68FR9	Elongation factor 1-delta OS=Rattus norvegicus GN=Eef1d PE=1 SV=2 - [EF1D_RAT]	21.0141	28.83	2	6	6	8	6.70925e+06	281	31.3109	5.05908
Q5HZV9	Protein phosphatase 1 regulatory subunit 7 OS=Rattus norvegicus GN=Ppp1r7 PE=1 SV=1 - [PP1R7_RAT]	20.9407	14.72	1	5	5	8	1.14404e+06	360	41.2714	4.91943
P17764	Acetyl-CoA acetyltransferase, mitochondrial OS=Rattus norvegicus GN=Acat1 PE=1 SV=1 - [THIL_RAT]	20.9367	18.16	1	6	6	10	6.41596e+06	424	44.6664	8.76318
F1LZW6	Protein Slc25a13 (Fragment) OS=Rattus norvegicus GN=Slc25a13 PE=3 SV=1 - [F1LZW6_RAT]	20.9356	9.93	1	3	7	10	2.13555e+06	675	74.3358	8.70459
Q06000	Lipoprotein lipase OS=Rattus norvegicus GN=Lpl PE=1 SV=1 - [LIPL_RAT]	20.8326	8.44	1	4	4	8	2.26253e+06	474	53.0489	8.1333
G3V6H5	Mitochondrial 2-oxoglutarate/malate carrier protein OS=Rattus norvegicus GN=Slc25a11 PE=3 SV=1 - [G3V6H5_RAT]	20.8234	21.34	2	6	6	9	2.15523e+06	314	34.1149	9.96436
Q5XII0	Mammalian ependymin-related protein 1 OS=Rattus norvegicus GN=Epdr1 PE=2 SV=1 - [EPDR1_RAT]	20.7909	19.64	1	4	4	9	3.31043e+06	224	25.6229	7.57666
Q5PQK2	Fusion, derived from t(12;16) malignant liposarcoma (Human) OS=Rattus norvegicus GN=Fus PE=2 SV=1 - [Q5PQK2_RAT]	20.729	5.41	2	2	2	9	3.71026e+06	518	52.6415	9.36377
B2RYX0	Naca protein OS=Rattus norvegicus GN=Naca PE=2 SV=1 - [B2RYX0_RAT]	20.6706	19.53	2	3	3	6	3.42467e+06	215	23.3697	4.56396
Q5RK09	Eukaryotic translation initiation factor 3 subunit G OS=Rattus norvegicus GN=Eif3g PE=2 SV=1 - [EIF3G_RAT]	20.534	11.88	1	4	4	7	1.80938e+06	320	35.6289	5.89697
Q9JK11-2	Isoform 2 of Reticulon-4 OS=Rattus norvegicus GN=Rtn4 - [RTN4_RAT]	20.4344	11.39	6	3	3	8	1.14808e+06	360	38.7983	4.75439
P34064	Proteasome subunit alpha type-5 OS=Rattus norvegicus GN=Psma5 PE=2 SV=1 - [PSA5_RAT]	20.4199	20.33	2	4	4	7	5.95464e+06	241	26.3742	4.85596
P62494	Ras-related protein Rab-11A OS=Rattus norvegicus GN=Rab11a PE=1 SV=3 - [RB11A_RAT]	20.3422	20.83	2	4	4	7	2.18831e+06	216	24.3784	6.56592
A0JPL2	Casein kinase 1, alpha 1, isoform CRA_d OS=Rattus norvegicus GN=Csnk1a1 PE=2 SV=1 - [A0JPL2_RAT]	20.2827	6.23	2	1	1	5	255829	337	38.8899	9.56885
P62890	60S ribosomal protein L30 OS=Rattus norvegicus GN=Rpl30 PE=3 SV=2 - [RL30_RAT]	20.0519	47.83	1	4	4	7	8.0027e+06	115	12.7757	9.62744
Q4KM65	Cleavage and polyadenylation specificity factor subunit 5 OS=Rattus norvegicus GN=Nudt21 PE=2 SV=1 - [CPSF5_RAT]	20.0481	26.87	1	6	6	8	3.23074e+06	227	26.2237	8.82178
D3ZP98	Histocompatibility 13 (Predicted), isoform CRA_a OS=Rattus norvegicus GN=Hm13 PE=4 SV=1 - [D3ZP98_RAT]	19.9521	7.97	1	3	3	11	1.55368e+06	364	40.249	6.7124
Q6P7R4	Scg2 protein OS=Rattus norvegicus GN=Scg2 PE=2 SV=1 - [Q6P7R4_RAT]	19.876	13.13	4	7	7	11	1.5026e+06	579	66.6221	4.7417
Q9ERM8	Secretory carrier membrane protein 3 (Fragment) OS=Rattus norvegicus GN=Scamp3 PE=2 SV=1 - [Q9ERM8_RAT]	19.85	14.16	2	2	2	5	3.26639e+06	226	24.8195	8.39697
D3ZPR0	Chromosome segregation 1-like (S. cerevisiae) (Predicted) OS=Rattus norvegicus GN=Cse1l PE=4 SV=1 - [D3ZPR0_RAT]	19.8431	7.42	1	7	7	10	3.12858e+06	971	110.144	5.77002
F8WFI0	Taste receptor type 1 member 2 OS=Rattus norvegicus GN=Aldh4a1 PE=3 SV=2 - [F8WFI0_RAT]	19.8106	10.5	5	5	5	8	1.7403e+06	562	61.7586	8.04541
D3ZUY8	Adaptor protein complex AP-2, alpha 1 subunit (Predicted) OS=Rattus norvegicus GN=Ap2a1 PE=4 SV=1 - [D3ZUY8_RAT]	19.7592	5.94	1	3	6	11	944747	977	107.607	7.06396
M0R6L4	Protein LOC100365839 OS=Rattus norvegicus GN=LOC100365839 PE=4 SV=1 - [M0R6L4_RAT]	19.7298	19.32	3	5	5	10	1.00384e+07	264	29.8887	9.72998
D4AE96	Importin 7 (Predicted), isoform CRA_c OS=Rattus norvegicus GN=Ipo7 PE=4 SV=1 - [D4AE96_RAT]	19.7166	5.88	1	5	5	8	3.22692e+06	1038	119.412	4.81787
F1M964	Mitochondrial-processing peptidase subunit alpha OS=Rattus norvegicus GN=Pmpca PE=2 SV=1 - [F1M964_RAT]	19.6393	14.18	3	8	8	15	3.30193e+06	522	58.2066	7.92822
Q5U2R7	LDLR chaperone MESD OS=Rattus norvegicus GN=Mesdc2 PE=2 SV=1 - [MESD_RAT]	19.5872	28.13	1	6	6	9	6.51752e+06	224	25.1997	5.65576
G3V936	Citrate synthase OS=Rattus norvegicus GN=Cs PE=3 SV=1 - [G3V936_RAT]	19.5735	14.59	3	6	6	10	4.75135e+06	466	51.7975	8.41162
Q00981	Ubiquitin carboxyl-terminal hydrolase isozyme L1 OS=Rattus norvegicus GN=Uchl1 PE=1 SV=2 - [UCHL1_RAT]	19.4687	21.08	1	4	4	8	6.23337e+06	223	24.8224	5.23682
P15178	Aspartate--tRNA ligase, cytoplasmic OS=Rattus norvegicus GN=Dars PE=2 SV=1 - [SYDC_RAT]	19.4645	15.77	1	8	8	9	4.9475e+06	501	57.0902	6.44287
P62198	26S protease regulatory subunit 8 OS=Rattus norvegicus GN=Psmc5 PE=1 SV=1 - [PRS8_RAT]	19.4111	15.76	8	4	6	10	5.63024e+06	406	45.5971	7.54736
Q64057	Alpha-aminoadipic semialdehyde dehydrogenase OS=Rattus norvegicus GN=Aldh7a1 PE=1 SV=2 - [AL7A1_RAT]	19.3423	7.79	1	3	3	6	1.15709e+06	539	58.7114	7.86963
B2RZ24	Sucla2 protein (Fragment) OS=Rattus norvegicus GN=Sucla2 PE=2 SV=1 - [B2RZ24_RAT]	19.3241	13.24	2	6	6	10	3.53571e+06	438	47.3576	6.45557
P62083	40S ribosomal protein S7 OS=Rattus norvegicus GN=Rps7 PE=1 SV=1 - [RS7_RAT]	19.2175	18.56	5	5	5	10	1.40297e+07	194	22.1133	10.0962
Q6AYB4	Heat shock 70 kDa protein 14 OS=Rattus norvegicus GN=Hspa14 PE=2 SV=1 - [HSP7E_RAT]	19.1512	14.93	1	6	6	9	1.81671e+06	509	54.4288	5.59229
P35704	Peroxiredoxin-2 OS=Rattus norvegicus GN=Prdx2 PE=1 SV=3 - [PRDX2_RAT]	19.0808	27.27	1	5	5	8	2.03235e+07	198	21.7701	5.59229
D3ZKU5	Protein RGD1564839 OS=Rattus norvegicus GN=RGD1564839 PE=4 SV=1 - [D3ZKU5_RAT]	19.0197	30.65	15	4	4	9	5.22566e+06	124	14.2668	10.2573
P35572	Insulin-like growth factor-binding protein 6 OS=Rattus norvegicus GN=Igfbp6 PE=1 SV=1 - [IBP6_RAT]	18.9775	22.57	1	5	5	9	7.51495e+06	226	24.1776	8.01611
F1LSG8	Protein Ccdc132 OS=Rattus norvegicus GN=Ccdc132 PE=2 SV=1 - [F1LSG8_RAT]	18.9583	5.81	3	5	5	8	839267	964	111.118	6.07471
P14604	Enoyl-CoA hydratase, mitochondrial OS=Rattus norvegicus GN=Echs1 PE=1 SV=1 - [ECHM_RAT]	18.9219	21.03	1	5	5	10	2.05826e+06	290	31.4962	8.1333
D4A7M6	Protein LOC100359539 OS=Rattus norvegicus GN=LOC100359539 PE=4 SV=1 - [D4A7M6_RAT]	18.9022	12.56	2	4	4	6	2.04735e+06	390	44.9938	5.64307
F1LU71	AU RNA binding protein/enoyl-coenzyme A hydratase (Predicted), isoform CRA_a OS=Rattus norvegicus GN=Auh PE=3 SV=2 - [F1LU71_RAT]	18.8922	17.46	1	4	4	8	2.98695e+06	315	33.32	9.42236
B0BNA7	Eukaryotic translation initiation factor 3 subunit I OS=Rattus norvegicus GN=Eif3i PE=2 SV=1 - [EIF3I_RAT]	18.8567	14.15	2	5	5	10	3.34636e+06	325	36.4376	5.64307
Q56A18-2	Isoform 2 of SWI/SNF-related matrix-associated actin-dependent regulator of chromatin subfamily E member 1 OS=Rattus norvegicus GN=Smarce1 - [SMCE1_RAT]	18.8138	16.29	5	4	4	7	1.15408e+06	307	35.2288	4.61475
Q5XHZ0	Heat shock protein 75 kDa, mitochondrial OS=Rattus norvegicus GN=Trap1 PE=1 SV=1 - [TRAP1_RAT]	18.7913	8.22	1	4	5	7	5.37833e+06	706	80.4108	7.03467
P52296	Importin subunit beta-1 OS=Rattus norvegicus GN=Kpnb1 PE=1 SV=1 - [IMB1_RAT]	18.7624	5.94	2	5	5	9	1.73676e+07	875	97.062	4.76709
D3ZUR9	Uncharacterized protein (Fragment) OS=Rattus norvegicus PE=2 SV=2 - [D3ZUR9_RAT]	18.5968	5.86	8	4	5	10	3.62e+06	1024	116.953	5.60498
Q5M7W5	Microtubule-associated protein 4 OS=Rattus norvegicus GN=Map4 PE=1 SV=1 - [MAP4_RAT]	18.4528	8.04	2	6	6	8	1.22361e+06	1057	110.233	4.729
Q6NYB7	Ras-related protein Rab-1A OS=Rattus norvegicus GN=Rab1A PE=1 SV=3 - [RAB1A_RAT]	18.4512	32.68	19	1	7	14	2.47165e+07	205	22.6634	6.21436
Q68FS2	COP9 signalosome complex subunit 4 OS=Rattus norvegicus GN=Cops4 PE=2 SV=1 - [CSN4_RAT]	18.3353	19.21	1	7	7	8	2.15363e+06	406	46.2607	5.84619
D3ZG43	NADH dehydrogenase (Ubiquinone) Fe-S protein 3 (Predicted), isoform CRA_c OS=Rattus norvegicus GN=Ndufs3 PE=3 SV=1 - [D3ZG43_RAT]	18.2433	18.94	1	4	4	7	3.97495e+06	264	30.2076	7.53271
B4F763	Vps53 protein OS=Rattus norvegicus GN=Vps53 PE=2 SV=1 - [B4F763_RAT]	18.2001	9.09	2	7	7	9	1.45406e+06	803	91.0703	6.60986
Q5RJR2	Twinfilin-1 OS=Rattus norvegicus GN=Twf1 PE=2 SV=1 - [TWF1_RAT]	18.1863	12	2	4	4	9	1.71696e+06	350	40.0655	6.66846
Q9EQS0	Transaldolase OS=Rattus norvegicus GN=Taldo1 PE=1 SV=2 - [TALDO_RAT]	18.1786	13.65	1	4	4	7	4.1042e+06	337	37.4365	7.03467
C0JPT7	Filamin alpha OS=Rattus norvegicus GN=Flna PE=2 SV=1 - [C0JPT7_RAT]	18.1188	2.77	2	5	6	10	1.18312e+06	2639	280.32	6.03662
Q80U96	Exportin-1 OS=Rattus norvegicus GN=Xpo1 PE=2 SV=1 - [XPO1_RAT]	18.1143	5.23	2	5	5	8	2.27026e+06	1071	122.959	6.07471
G3V9N1	RCG21137 OS=Rattus norvegicus GN=Pgam5 PE=4 SV=1 - [G3V9N1_RAT]	18.0413	27.43	3	8	8	18	9.24603e+06	288	31.9805	8.67529
P62250	40S ribosomal protein S16 OS=Rattus norvegicus GN=Rps16 PE=1 SV=2 - [RS16_RAT]	17.9414	32.88	8	5	5	11	4.43952e+06	146	16.435	10.2134
B0BMW0	RAB14, member RAS oncogene family OS=Rattus norvegicus GN=Rab14 PE=2 SV=1 - [B0BMW0_RAT]	17.9091	9.3	15	1	2	8	7.57197e+06	215	23.8819	6.21436
B5DFC3	Protein Sec23a OS=Rattus norvegicus GN=Sec23a PE=2 SV=1 - [B5DFC3_RAT]	17.8791	6.27	1	4	4	10	938902	765	86.1064	7.07861
D3ZUD8	Protein Tm9sf3 OS=Rattus norvegicus GN=Tm9sf3 PE=2 SV=1 - [D3ZUD8_RAT]	17.809	5.45	2	3	3	9	959346	587	67.4999	7.21045
P62832	60S ribosomal protein L23 OS=Rattus norvegicus GN=Rpl23 PE=2 SV=1 - [RL23_RAT]	17.779	25	1	2	2	6	700807	140	14.8561	10.5063
Q07647	Solute carrier family 2, facilitated glucose transporter member 3 OS=Rattus norvegicus GN=Slc2a3 PE=1 SV=1 - [GTR3_RAT]	17.6904	9.74	2	5	6	8	5.56574e+06	493	53.5459	4.98291
P24268	Cathepsin D OS=Rattus norvegicus GN=Ctsd PE=1 SV=1 - [CATD_RAT]	17.6381	14.5	2	5	5	8	5.76276e+06	407	44.6519	7.09326
F1LNF7	Isocitrate dehydrogenase [NAD] subunit alpha, mitochondrial OS=Rattus norvegicus GN=Idh3a PE=2 SV=1 - [F1LNF7_RAT]	17.5316	11.48	2	4	4	7	2.88546e+06	366	39.557	6.91748
F1M1D5	Protein Tbcd OS=Rattus norvegicus GN=Tbcd PE=4 SV=2 - [F1M1D5_RAT]	17.2662	6.12	1	7	7	8	2.3442e+06	1192	133.02	6.26514
Q794F9	4F2 cell-surface antigen heavy chain OS=Rattus norvegicus GN=Slc3a2 PE=1 SV=1 - [4F2_RAT]	17.2506	8.92	1	4	4	6	2.53048e+06	527	58.0361	5.32568
P11762	Galectin-1 OS=Rattus norvegicus GN=Lgals1 PE=1 SV=2 - [LEG1_RAT]	17.2325	25.93	1	3	3	9	4.5699e+06	135	14.8472	5.26221
F1LRB8	S-adenosylmethionine synthase OS=Rattus norvegicus GN=LOC100363915 PE=2 SV=2 - [F1LRB8_RAT]	17.2111	12.91	5	4	4	8	1.94019e+06	395	43.6473	6.3667
P11232	Thioredoxin OS=Rattus norvegicus GN=Txn PE=1 SV=2 - [THIO_RAT]	17.196	32.38	1	3	3	8	7.81216e+06	105	11.6657	4.91943
Q5XIH3	NADH dehydrogenase (Ubiquinone) flavoprotein 1 OS=Rattus norvegicus GN=Ndufv1 PE=2 SV=1 - [Q5XIH3_RAT]	17.174	10.78	1	5	5	8	3.37531e+06	464	50.6986	8.07471
D3ZUI1	APAF1 interacting protein (Predicted), isoform CRA_b OS=Rattus norvegicus GN=Apip PE=4 SV=2 - [D3ZUI1_RAT]	17.1046	27.65	1	3	3	6	513597	170	19.2234	6.99072
P62828	GTP-binding nuclear protein Ran OS=Rattus norvegicus GN=Ran PE=1 SV=3 - [RAN_RAT]	17.1023	18.52	3	4	4	8	8.48418e+06	216	24.4076	7.48877
F1LSK6	Cytochrome P450 20A1 OS=Rattus norvegicus GN=Cyp20a1 PE=2 SV=1 - [F1LSK6_RAT]	17.0789	10.17	2	4	4	7	2.20185e+06	462	51.9352	6.75635
Q3KRE2	Methyltransferase like 7A OS=Rattus norvegicus GN=Mettl7a PE=2 SV=1 - [Q3KRE2_RAT]	16.9743	14.75	2	3	3	6	999529	244	28.1234	8.45557
D4A8N1	Protein Dpm1 OS=Rattus norvegicus GN=Dpm1 PE=4 SV=1 - [D4A8N1_RAT]	16.9474	20.77	1	5	5	10	5.53132e+06	260	29.2315	9.49561
Q5RKJ9	RAB10, member RAS oncogene family OS=Rattus norvegicus GN=Rab10 PE=2 SV=1 - [Q5RKJ9_RAT]	16.9109	23.5	18	3	5	9	1.87864e+07	200	22.5266	8.38232
P07943	Aldose reductase OS=Rattus norvegicus GN=Akr1b1 PE=1 SV=3 - [ALDR_RAT]	16.8604	22.15	7	7	7	9	3.4299e+06	316	35.7743	6.7124
B2RZ72	Actin related protein 2/3 complex, subunit 4 (Predicted), isoform CRA_a OS=Rattus norvegicus GN=Arpc4 PE=2 SV=1 - [B2RZ72_RAT]	16.8528	26.19	1	5	5	9	1.76941e+07	168	19.6543	8.42627
G3V8Q1	Protein Cope OS=Rattus norvegicus GN=Cope PE=4 SV=2 - [G3V8Q1_RAT]	16.6965	27.88	2	3	3	6	2.06973e+06	165	18.4963	4.90674
Q68FY0	Cytochrome b-c1 complex subunit 1, mitochondrial OS=Rattus norvegicus GN=Uqcrc1 PE=1 SV=1 - [QCR1_RAT]	16.6876	10.83	1	4	5	8	3.74149e+06	480	52.8154	5.88428
A0JPM9	Eukaryotic translation initiation factor 3 subunit J OS=Rattus norvegicus GN=Eif3j PE=2 SV=1 - [EIF3J_RAT]	16.6185	13.13	2	3	3	6	776928	259	29.1695	4.80518
G3V7A5	Low density lipoprotein receptor, isoform CRA_a OS=Rattus norvegicus GN=Ldlr PE=4 SV=1 - [G3V7A5_RAT]	16.5955	5.46	2	4	4	6	2.29388e+06	879	96.5861	5.04639
Q02563	Synaptic vesicle glycoprotein 2A OS=Rattus norvegicus GN=Sv2a PE=1 SV=2 - [SV2A_RAT]	16.5387	6.06	1	4	4	8	2.04166e+06	742	82.6079	5.56689
P15205	Microtubule-associated protein 1B OS=Rattus norvegicus GN=Map1b PE=1 SV=2 - [MAP1B_RAT]	16.5244	1.46	2	2	3	5	5.83209e+06	2459	269.334	4.80518
Q64620	Serine/threonine-protein phosphatase 6 catalytic subunit OS=Rattus norvegicus GN=Ppp6c PE=2 SV=2 - [PPP6_RAT]	16.4554	8.85	1	2	2	6	3.62185e+06	305	35.1365	5.69385
Q63699	Cyclin-dependent kinase 2 OS=Rattus norvegicus GN=Cdk2 PE=1 SV=1 - [CDK2_RAT]	16.3361	16.11	47	2	5	9	7.86851e+06	298	33.866	8.67529
Q32Q54	Protein Uqcc OS=Rattus norvegicus GN=Uqcc PE=2 SV=1 - [Q32Q54_RAT]	16.2784	3.01	1	1	1	7	478117	299	34.5234	8.76318
P70583	Deoxyuridine 5'-triphosphate nucleotidohydrolase OS=Rattus norvegicus GN=Dut PE=2 SV=3 - [DUT_RAT]	16.2067	21.46	2	4	4	8	2.69935e+06	205	21.9893	8.77783
Q5XHZ9	Pachytene checkpoint protein 2 homolog OS=Rattus norvegicus GN=Trip13 PE=2 SV=1 - [PCH2_RAT]	16.198	11.81	1	5	5	8	1.74786e+06	432	48.4035	6.0874
D4A0F5	Septin-7 OS=Rattus norvegicus GN=Sept7 PE=2 SV=2 - [D4A0F5_RAT]	16.1685	10.32	12	4	4	6	1.6683e+06	436	50.5759	8.57275
D3ZU74	Cytoplasmic dynein 1 intermediate chain 2 OS=Rattus norvegicus GN=Dync1i2 PE=4 SV=1 - [D3ZU74_RAT]	16.1501	9.48	6	4	4	8	1.24488e+06	612	68.3207	5.2876
Q4G079	Protein Aimp1 OS=Rattus norvegicus GN=Aimp1 PE=2 SV=1 - [Q4G079_RAT]	16.1441	17.78	2	4	4	6	2.54532e+06	315	34.552	8.29443
Q7M0F1	Glutathione transferase 3 (Fragments) OS=Rattus norvegicus PE=1 SV=1 - [Q7M0F1_RAT]	16.0595	38.26	1	1	4	7	1.19838e+07	115	13.7327	5.26221
Q4FZS2	Budding uninhibited by benzimidazoles 3 homolog (S. cerevisiae) OS=Rattus norvegicus GN=Bub3 PE=2 SV=1 - [Q4FZS2_RAT]	16.0542	14.72	3	4	4	7	2.09703e+06	326	36.9311	6.84424
Q9R1Z0	Voltage-dependent anion-selective channel protein 3 OS=Rattus norvegicus GN=Vdac3 PE=1 SV=2 - [VDAC3_RAT]	15.9485	19.08	2	3	4	6	2.15254e+06	283	30.7784	8.70459
P97536	Cullin-associated NEDD8-dissociated protein 1 OS=Rattus norvegicus GN=Cand1 PE=1 SV=1 - [CAND1_RAT]	15.9462	5.77	1	6	6	7	1.16941e+06	1230	136.275	5.78271
Q5RKI5	Flightless I homolog (Drosophila) OS=Rattus norvegicus GN=Flii PE=2 SV=1 - [Q5RKI5_RAT]	15.8809	3.62	2	4	5	8	1.4302e+06	1270	144.766	5.99854
G3V8V0	ADP-ribosylation factor-like 2, isoform CRA_a OS=Rattus norvegicus GN=Arl2 PE=3 SV=1 - [G3V8V0_RAT]	15.8278	11.96	2	2	2	5	3.02439e+06	184	20.8508	5.96045
F2Z3T7	Isochorismatase domain-containing protein 1 OS=Rattus norvegicus GN=Isoc1 PE=4 SV=1 - [F2Z3T7_RAT]	15.7051	19.53	2	5	5	7	4.04912e+06	297	32.012	7.38623
Q5PPJ7	Psmd1 protein (Fragment) OS=Rattus norvegicus GN=Psmd1 PE=2 SV=1 - [Q5PPJ7_RAT]	15.5783	6.26	5	5	5	6	1.74595e+06	846	93.2626	6.39209
G3V818	Alpha-parvin OS=Rattus norvegicus GN=Parva PE=4 SV=1 - [G3V818_RAT]	15.5637	11.56	3	3	3	4	527936	372	42.2954	5.94775
Q5M830	Protein Rfc3 OS=Rattus norvegicus GN=Rfc3 PE=2 SV=1 - [Q5M830_RAT]	15.5463	13.2	1	4	4	6	739744	356	40.453	8.47021
Q5PQL2	Cell differentiation protein RCD1 homolog OS=Rattus norvegicus GN=Rqcd1 PE=1 SV=1 - [RCD1_RAT]	15.5394	14.05	1	4	4	6	2.40371e+06	299	33.5799	8.03076
M0RDR2	Protein LOC100909521 OS=Rattus norvegicus GN=LOC100909521 PE=4 SV=1 - [M0RDR2_RAT]	15.4752	8.27	3	4	4	7	1.74497e+06	556	60.8242	4.60205
D3ZLL8	Protein LOC100909878 OS=Rattus norvegicus GN=Rps15a-ps7 PE=3 SV=1 - [D3ZLL8_RAT]	15.4045	34.62	6	5	5	11	2.17585e+06	130	14.8449	10.1255
P18420	Proteasome subunit alpha type-1 OS=Rattus norvegicus GN=Psma1 PE=1 SV=2 - [PSA1_RAT]	15.3644	17.11	1	4	4	9	5.84576e+06	263	29.4988	6.60986
Q4KM87	Actin-like 6A OS=Rattus norvegicus GN=Actl6a PE=2 SV=1 - [Q4KM87_RAT]	15.3239	11.42	2	4	4	6	1.06459e+06	429	47.3903	5.60498
Q5PPJ6	Leucyl-tRNA synthetase OS=Rattus norvegicus GN=Lars PE=2 SV=1 - [Q5PPJ6_RAT]	15.295	5.77	1	5	5	6	1.15259e+06	1178	134.192	7.28369
P10760	Adenosylhomocysteinase OS=Rattus norvegicus GN=Ahcy PE=1 SV=3 - [SAHH_RAT]	15.2801	11.11	2	4	4	6	1.94822e+06	432	47.5072	6.53662
D3ZFA8	Protein LOC100362366 OS=Rattus norvegicus GN=LOC100364909 PE=3 SV=1 - [D3ZFA8_RAT]	15.2057	15.56	5	2	2	6	1.39755e+07	135	15.4583	9.77393
Q5XI73	Rho GDP-dissociation inhibitor 1 OS=Rattus norvegicus GN=Arhgdia PE=1 SV=1 - [GDIR1_RAT]	15.1288	15.2	1	2	2	4	5.18613e+06	204	23.3928	5.19873
Q4V8I6	Ribosomal protein L11 OS=Rattus norvegicus GN=Rpl11 PE=2 SV=1 - [Q4V8I6_RAT]	15.0642	17.96	2	3	3	5	5.55547e+06	167	19.0121	9.80322
G3V886	ATP-dependent zinc metalloprotease YME1L1 OS=Rattus norvegicus GN=Yme1l1 PE=3 SV=1 - [G3V886_RAT]	14.9837	6.57	3	4	4	6	1.12217e+06	715	79.7457	8.89502
Q3MHS9	Chaperonin containing Tcp1, subunit 6A (Zeta 1) OS=Rattus norvegicus GN=Cct6a PE=2 SV=1 - [Q3MHS9_RAT]	14.9673	12.62	6	6	6	9	3.06958e+06	531	57.9807	7.07861
P00787	Cathepsin B OS=Rattus norvegicus GN=Ctsb PE=1 SV=2 - [CATB_RAT]	14.9438	16.22	2	4	4	7	2.20646e+06	339	37.4456	5.60498
P61621	Protein transport protein Sec61 subunit alpha isoform 1 OS=Rattus norvegicus GN=Sec61a1 PE=2 SV=2 - [S61A1_RAT]	14.8748	6.09	2	3	3	7	6.03197e+06	476	52.2305	8.06006
D4A9Y0	Protein Sdf2l1 OS=Rattus norvegicus GN=Sdf2l1 PE=4 SV=1 - [D4A9Y0_RAT]	14.827	15	1	2	2	5	4.97458e+06	220	23.3886	7.41553
Q5EBA4	Nipsnap1 protein (Fragment) OS=Rattus norvegicus GN=Nipsnap1 PE=2 SV=1 - [Q5EBA4_RAT]	14.8087	11.31	2	3	3	6	8.21314e+06	283	33.194	9.37842
O70534	Delta-like 1 homolog (Drosophila) OS=Rattus norvegicus GN=Dlk1 PE=2 SV=1 - [O70534_RAT]	14.7378	7.57	2	3	3	5	2.77793e+06	383	41.1213	5.75732
F1LS86	Isoleucine-tRNA synthetase (Predicted) OS=Rattus norvegicus GN=Iars PE=2 SV=2 - [F1LS86_RAT]	14.7346	5.78	2	7	7	8	1.75285e+06	1262	144.194	6.30322
D3ZJ32	Protein Esyt2 OS=Rattus norvegicus GN=Esyt2 PE=4 SV=2 - [D3ZJ32_RAT]	14.6922	7.34	1	6	6	7	969980	845	94.3567	7.28369
P68101	Eukaryotic translation initiation factor 2 subunit 1 OS=Rattus norvegicus GN=Eif2s1 PE=1 SV=2 - [IF2A_RAT]	14.5841	10.79	1	3	3	6	1.8685e+06	315	36.0854	5.08447
P54311	Guanine nucleotide-binding protein G(I)/G(S)/G(T) subunit beta-1 OS=Rattus norvegicus GN=Gnb1 PE=1 SV=4 - [GBB1_RAT]	14.5793	10	13	4	4	7	3.5666e+06	340	37.353	5.99854
Q03114	Cyclin-dependent kinase 5 OS=Rattus norvegicus GN=Cdk5 PE=1 SV=1 - [CDK5_RAT]	14.5598	17.81	45	4	5	9	4.81573e+06	292	33.2332	7.66455
Q66HR2	Microtubule-associated protein RP/EB family member 1 OS=Rattus norvegicus GN=Mapre1 PE=1 SV=3 - [MARE1_RAT]	14.5212	13.81	3	3	3	7	3.81139e+06	268	29.9852	5.22412
D3ZWT2	Protein Fitm2 OS=Rattus norvegicus GN=Fitm2 PE=4 SV=1 - [D3ZWT2_RAT]	14.5187	16.79	1	3	4	9	4.09602e+06	262	30.0926	8.95361
Q6P9U8	Eukaryotic translation initiation factor 3 subunit H OS=Rattus norvegicus GN=Eif3h PE=2 SV=1 - [EIF3H_RAT]	14.4096	10.8	3	3	3	6	1.30365e+06	352	39.88	6.66846
Q6U7I6	Adenosine monophosphate-activated protein kinase gamma 2-subunit (Fragment) OS=Rattus norvegicus GN=Prkag2 PE=2 SV=1 - [Q6U7I6_RAT]	14.3943	21.25	3	5	6	6	2.28524e+06	287	32.9784	7.98682
Q4V8H5	Aspartyl aminopeptidase OS=Rattus norvegicus GN=Dnpep PE=2 SV=1 - [Q4V8H5_RAT]	14.3269	9.68	1	4	4	6	1.17806e+06	475	52.5219	7.25439
P08082-2	Isoform Non-brain of Clathrin light chain B OS=Rattus norvegicus GN=Cltb - [CLCB_RAT]	14.3234	8.53	2	2	2	6	1.42983e+06	211	23.1062	4.67822
D3ZD11	Protein Spcs2 OS=Rattus norvegicus GN=Spcs2 PE=4 SV=1 - [D3ZD11_RAT]	14.2479	14.6	1	2	2	4	1.10904e+06	226	24.9577	8.57275
G3V7I0	Peroxiredoxin 3 OS=Rattus norvegicus GN=Prdx3 PE=4 SV=1 - [G3V7I0_RAT]	14.2008	18.68	2	5	5	7	9.54878e+06	257	28.2815	7.54736
P53534	Glycogen phosphorylase, brain form (Fragment) OS=Rattus norvegicus GN=Pygb PE=1 SV=3 - [PYGB_RAT]	14.1837	7.88	7	6	6	6	1.06815e+06	838	96.1131	6.68311
P25113	Phosphoglycerate mutase 1 OS=Rattus norvegicus GN=Pgam1 PE=1 SV=4 - [PGAM1_RAT]	14.1387	14.57	3	3	3	6	3.17851e+06	254	28.8139	7.18115
P63170	Dynein light chain 1, cytoplasmic OS=Rattus norvegicus GN=Dynll1 PE=1 SV=1 - [DYL1_RAT]	13.9583	49.44	1	1	3	7	5.14572e+06	89	10.3591	7.40088
O89035	Mitochondrial dicarboxylate carrier OS=Rattus norvegicus GN=Slc25a10 PE=2 SV=1 - [O89035_RAT]	13.9264	12.94	1	3	3	5	1.47739e+06	286	31.4341	9.29053
P07871	3-ketoacyl-CoA thiolase B, peroxisomal OS=Rattus norvegicus GN=Acaa1b PE=2 SV=2 - [THIKB_RAT]	13.9252	16.04	5	5	5	6	1.64095e+06	424	43.7927	8.22119
Q5RKG9	Eukaryotic translation initiation factor 4B OS=Rattus norvegicus GN=Eif4b PE=2 SV=1 - [Q5RKG9_RAT]	13.916	4.91	1	2	2	5	487285	611	69.0233	5.80811
B2RZC4	Protein Mis18-alpha OS=Rattus norvegicus GN=Mis18a PE=2 SV=1 - [MS18A_RAT]	13.883	12.11	1	3	3	5	574251	223	25.2003	5.77002
Q9Z1B2	Glutathione S-transferase Mu 5 OS=Rattus norvegicus GN=Gstm5 PE=1 SV=3 - [GSTM5_RAT]	13.8688	17.33	2	3	4	7	9.09084e+06	225	26.6111	6.75635
Q5U316	Ras-related protein Rab-35 OS=Rattus norvegicus GN=Rab35 PE=2 SV=1 - [RAB35_RAT]	13.8686	15.42	16	1	3	8	1.72728e+07	201	23.0108	8.29443
Q5FVG4	Protein LOC100911440 OS=Rattus norvegicus GN=Slc25a22 PE=2 SV=1 - [Q5FVG4_RAT]	13.8241	23.14	1	3	5	6	2.10652e+06	229	24.6238	8.60205
B2RZ78	Vacuolar protein sorting-associated protein 29 OS=Rattus norvegicus GN=Vps29 PE=1 SV=2 - [VPS29_RAT]	13.8241	24.18	2	4	4	9	3.31284e+06	182	20.4556	6.78564
Q32PX6	Protein Rhog OS=Rattus norvegicus GN=Rhog PE=2 SV=1 - [Q32PX6_RAT]	13.7328	12.57	5	1	2	5	1.31119e+06	191	21.2949	8.11865
O35244	Peroxiredoxin-6 OS=Rattus norvegicus GN=Prdx6 PE=1 SV=3 - [PRDX6_RAT]	13.7161	24.55	1	6	6	8	4.13932e+06	224	24.803	5.93506
Q9JHB5	Translin-associated protein X OS=Rattus norvegicus GN=Tsnax PE=1 SV=1 - [TSNAX_RAT]	13.7131	9.66	1	3	3	8	1.3715e+06	290	32.9846	6.55127
Q07984	Translocon-associated protein subunit delta OS=Rattus norvegicus GN=Ssr4 PE=2 SV=1 - [SSRD_RAT]	13.6906	19.65	2	3	3	5	1.57842e+06	173	18.9675	5.78271
Q6P762	Mannosidase 2, alpha B1 OS=Rattus norvegicus GN=Man2b1 PE=2 SV=1 - [Q6P762_RAT]	13.6441	7.53	1	7	7	7	1.94411e+06	1009	114.255	8.66064
P20673	Argininosuccinate lyase OS=Rattus norvegicus GN=Asl PE=2 SV=1 - [ARLY_RAT]	13.6203	13.02	2	5	5	6	1.75448e+06	461	51.5173	6.40479
P62870	Transcription elongation factor B polypeptide 2 OS=Rattus norvegicus GN=Tceb2 PE=1 SV=1 - [ELOB_RAT]	13.592	24.58	7	3	3	5	4.92729e+06	118	13.1616	5.0083
B0BN52	Mitochondrial carrier homolog 2 (C. elegans) OS=Rattus norvegicus GN=Mtch2 PE=2 SV=1 - [B0BN52_RAT]	13.5501	16.5	1	4	4	7	1.82689e+06	303	33.506	8.25049
Q62744	Alpha actinin OS=Rattus norvegicus GN=Actn4 PE=2 SV=1 - [Q62744_RAT]	13.5453	6.28	7	2	6	6	5.77579e+06	892	102.5	5.42725
Q9QX80	CArG-binding factor A OS=Rattus norvegicus GN=Hnrnpab PE=2 SV=1 - [Q9QX80_RAT]	13.541	15.09	5	4	4	5	1.66602e+06	285	30.8343	7.91357
D3ZW08	Adenylosuccinate lyase (Predicted) OS=Rattus norvegicus GN=Adsl PE=4 SV=1 - [D3ZW08_RAT]	13.5011	10.74	1	4	4	7	2.73271e+06	484	54.8169	7.10791
G3V7L8	ATPase, H+ transporting, V1 subunit E isoform 1, isoform CRA_a OS=Rattus norvegicus GN=Atp6v1e1 PE=3 SV=1 - [G3V7L8_RAT]	13.4317	13.27	4	3	3	7	1.6143e+06	226	26.1268	8.42627
A1L108-2	Isoform 2 of Actin-related protein 2/3 complex subunit 5-like protein OS=Rattus norvegicus GN=Arpc5l - [ARP5L_RAT]	13.359	24.75	3	2	2	5	3.75616e+06	101	11.2282	10.0669
P62193	26S protease regulatory subunit 4 OS=Rattus norvegicus GN=Psmc1 PE=2 SV=1 - [PRS4_RAT]	13.3508	7.5	1	2	3	7	4.16795e+06	440	49.1537	6.21436
P18484	AP-2 complex subunit alpha-2 OS=Rattus norvegicus GN=Ap2a2 PE=1 SV=3 - [AP2A2_RAT]	13.3299	4.58	2	2	5	9	1.22309e+06	938	103.979	6.93213
Q91Y94	Cytochrome c oxidase subunit 4 isoform 2, mitochondrial OS=Rattus norvegicus GN=Cox4i2 PE=2 SV=1 - [COX42_RAT]	13.2194	14.53	1	3	3	9	6.48505e+06	172	20.1571	9.42236
G3V6U3	Asparagine-linked glycosylation 2 homolog (Yeast, alpha-1,3-mannosyltransferase), isoform CRA_a OS=Rattus norvegicus GN=Alg2 PE=4 SV=1 - [G3V6U3_RAT]	13.2007	11.33	2	5	5	6	2.08609e+06	415	47.2883	7.97217
P19637	Tissue-type plasminogen activator OS=Rattus norvegicus GN=Plat PE=2 SV=2 - [TPA_RAT]	13.1637	8.77	1	4	4	6	1.60412e+06	559	62.8621	8.14795
D4A2H2	Protein Sptlc1 OS=Rattus norvegicus GN=Sptlc1 PE=4 SV=1 - [D4A2H2_RAT]	13.0635	6.55	1	3	3	6	735369	473	52.5153	6.53662
B2GUX3	Mcm5 protein OS=Rattus norvegicus GN=Mcm5 PE=2 SV=1 - [B2GUX3_RAT]	13.0106	9.81	2	7	7	8	2.79839e+06	734	82.4131	8.29443
D3ZSE6	Uncharacterized protein OS=Rattus norvegicus PE=4 SV=2 - [D3ZSE6_RAT]	12.973	5.97	1	1	1	6		352	39.7085	8.96826
G3V8G2	Proteasome (Prosome, macropain) 26S subunit, non-ATPase, 5 (Predicted), isoform CRA_a OS=Rattus norvegicus GN=Psmd5 PE=4 SV=1 - [G3V8G2_RAT]	12.9696	14.88	2	6	6	7	1.95343e+06	504	55.8179	5.2749
Q66HG5	Transmembrane 9 superfamily member 2 OS=Rattus norvegicus GN=Tm9sf2 PE=2 SV=1 - [TM9S2_RAT]	12.8928	9.2	1	5	5	9	595432	663	75.5363	7.44482
G3V7M0	Protein Cnot1 OS=Rattus norvegicus GN=Cnot1 PE=4 SV=1 - [G3V7M0_RAT]	12.8236	0.93	3	2	2	5	591559	2376	266.695	7.10791
F1LN03	Lysophosphatidylcholine acyltransferase 2 OS=Rattus norvegicus GN=Lpcat2 PE=2 SV=1 - [F1LN03_RAT]	12.7492	9.56	2	5	5	6	2.04269e+06	544	60.1423	6.46826
D4A9L2	Protein Srsf1 OS=Rattus norvegicus GN=Srsf1 PE=4 SV=1 - [D4A9L2_RAT]	12.7279	14.52	1	3	3	5	1.27249e+06	248	27.7278	10.3599
B1WC67	Protein Slc25a24 OS=Rattus norvegicus GN=Slc25a24 PE=2 SV=1 - [B1WC67_RAT]	12.7073	6.95	1	3	3	5	1.74451e+06	475	52.8573	8.04541
B1WC61	Acad9 protein OS=Rattus norvegicus GN=Acad9 PE=2 SV=1 - [B1WC61_RAT]	12.6913	7.36	2	4	4	5	859107	625	68.7997	7.69385
D3ZI16	COP9 (Constitutive photomorphogenic) homolog, subunit 6 (Arabidopsis thaliana) (Predicted), isoform CRA_a OS=Rattus norvegicus GN=Cops6 PE=4 SV=1 - [D3ZI16_RAT]	12.6814	10.17	1	3	3	5	2.16146e+06	344	37.678	6.13818
Q5FVC4	DnaJ (Hsp40) homolog, subfamily B, member 12 OS=Rattus norvegicus GN=Dnajb12 PE=2 SV=1 - [Q5FVC4_RAT]	12.5927	16.93	1	4	4	8	1.26183e+06	378	42.495	8.49951
O35314	Secretogranin-1 OS=Rattus norvegicus GN=Chgb PE=1 SV=2 - [SCG1_RAT]	12.5699	9.93	1	5	5	6	1.87979e+06	675	77.489	5.03369
P62138	Serine/threonine-protein phosphatase PP1-alpha catalytic subunit OS=Rattus norvegicus GN=Ppp1ca PE=1 SV=1 - [PP1A_RAT]	12.4866	20	6	3	6	8	1.64716e+06	330	37.4878	6.32861
B2RYA8	LOC689593 protein OS=Rattus norvegicus GN=LOC689593 PE=2 SV=1 - [B2RYA8_RAT]	12.4502	12.27	2	2	3	6	4.26805e+06	277	30.6758	4.89404
D4A415	Protein Fam175b OS=Rattus norvegicus GN=Fam175b PE=4 SV=2 - [D4A415_RAT]	12.4249	2.6	1	1	1	4	910017	423	47.7754	6.06201
P62332	ADP-ribosylation factor 6 OS=Rattus norvegicus GN=Arf6 PE=1 SV=2 - [ARF6_RAT]	12.3849	12.57	8	1	3	8	2.03325e+07	175	20.0694	8.95361
F1LQC1	Acyl-coenzyme A oxidase OS=Rattus norvegicus GN=Acox1 PE=3 SV=2 - [F1LQC1_RAT]	12.3557	5.91	4	3	3	4	728931	660	74.5322	8.47021
D3ZZR5	Protein Snrpa1 OS=Rattus norvegicus GN=Snrpa1 PE=2 SV=1 - [D3ZZR5_RAT]	12.3537	16.86	2	4	4	5	678131	255	28.3001	8.83643
Q4KM69	COP9 (Constitutive photomorphogenic) homolog, subunit 5 (Arabidopsis thaliana) OS=Rattus norvegicus GN=Cops5 PE=2 SV=1 - [Q4KM69_RAT]	12.3424	8.68	1	2	2	4	3.42719e+06	334	37.5547	6.53662
P62775	Myotrophin OS=Rattus norvegicus GN=Mtpn PE=1 SV=2 - [MTPN_RAT]	12.3192	14.41	1	1	1	3	1.46386e+06	118	12.8526	5.51611
D3ZSA9	Protein Nomo1 OS=Rattus norvegicus GN=Nomo1 PE=4 SV=1 - [D3ZSA9_RAT]	12.1952	2.97	1	3	3	6	721791	1214	133.359	6.07471
Q2PQA9	Kinesin-1 heavy chain OS=Rattus norvegicus GN=Kif5b PE=1 SV=1 - [KINH_RAT]	12.1876	5.19	5	4	4	5	1.08769e+06	963	109.463	6.44287
B0BN18	Prefoldin subunit 2 OS=Rattus norvegicus GN=Pfdn2 PE=2 SV=1 - [PFD2_RAT]	12.1749	16.88	1	2	2	3	3.74138e+06	154	16.5696	6.58057
Q4AEF8	Coatomer subunit gamma-1 OS=Rattus norvegicus GN=Copg1 PE=2 SV=1 - [COPG1_RAT]	12.1581	5.15	1	4	4	5	1.30768e+06	874	97.5515	5.38916
Q6AXS5-2	Isoform 2 of Plasminogen activator inhibitor 1 RNA-binding protein OS=Rattus norvegicus GN=Serbp1 - [PAIRB_RAT]	12.1142	4.08	2	1	1	3	126193	392	42.9585	8.44092
Q3KRD8	Eukaryotic translation initiation factor 6 OS=Rattus norvegicus GN=Eif6 PE=2 SV=1 - [IF6_RAT]	11.9403	10.2	1	2	2	4	964623	245	26.5542	4.7417
C9WPN2	DEAD (Asp-Glu-Ala-Asp) box polypeptide 3 Y-linked OS=Rattus norvegicus GN=Ddx3y PE=2 SV=1 - [C9WPN2_RAT]	11.9266	4.6	7	3	3	6	882438	652	72.9609	7.10791
Q64232	Very-long-chain enoyl-CoA reductase OS=Rattus norvegicus GN=Tecr PE=2 SV=1 - [TECR_RAT]	11.8812	9.09	1	3	3	6	1.45063e+06	308	36.0988	9.5542
P67874	Casein kinase II subunit beta OS=Rattus norvegicus GN=Csnk2b PE=1 SV=1 - [CSK2B_RAT]	11.7991	9.3	1	2	2	5	1.6739e+06	215	24.926	5.5542
B0BNK1	Protein Rab5c OS=Rattus norvegicus GN=Rab5c PE=2 SV=1 - [B0BNK1_RAT]	11.7772	15.74	5	3	3	5	1.74935e+06	216	23.4108	8.41162
P41498	Low molecular weight phosphotyrosine protein phosphatase OS=Rattus norvegicus GN=Acp1 PE=1 SV=3 - [PPAC_RAT]	11.7535	24.05	3	3	3	4	1.21082e+06	158	18.1398	6.52197
F1LRE1	Glutathione reductase OS=Rattus norvegicus GN=Gsr PE=2 SV=2 - [F1LRE1_RAT]	11.7441	5.61	2	2	2	4	2.1363e+06	410	44.761	7.10791
D4A857	Importin 9 (Predicted) OS=Rattus norvegicus GN=Ipo9 PE=4 SV=2 - [D4A857_RAT]	11.5801	4.51	1	5	5	7	3.30203e+06	1041	115.938	4.80518
Q64542-3	Isoform ZA of Plasma membrane calcium-transporting ATPase 4 OS=Rattus norvegicus GN=Atp2b4 - [AT2B4_RAT]	11.5238	2.42	51	2	2	4	476311	1157	127.384	6.53662
D4A1Z2	Uncharacterized protein OS=Rattus norvegicus GN=Rpl26-ps2 PE=3 SV=1 - [D4A1Z2_RAT]	11.5078	21.38	7	4	4	8	2.62092e+06	145	17.2195	10.4771
F1LSM5	Nck-associated protein 1 (Fragment) OS=Rattus norvegicus GN=Nckap1 PE=2 SV=2 - [F1LSM5_RAT]	11.4921	5.03	4	5	5	6	1.02728e+06	1093	124.861	6.7124
D4A8F2	Uncharacterized protein OS=Rattus norvegicus GN=Rsu1 PE=2 SV=2 - [D4A8F2_RAT]	11.4903	13.51	1	4	4	7	6.84964e+06	259	29.3757	9.23193
Q04462	Valine--tRNA ligase OS=Rattus norvegicus GN=Vars PE=2 SV=2 - [SYVC_RAT]	11.4661	3.01	2	3	3	5	632689	1264	140.28	7.60596
B5DF24	Uridine kinase OS=Rattus norvegicus GN=Uck1 PE=2 SV=1 - [B5DF24_RAT]	11.4647	10.25	1	2	3	5	3.08193e+06	283	31.6612	7.54736
Q6AXQ0	SUMO-activating enzyme subunit 1 OS=Rattus norvegicus GN=Sae1 PE=2 SV=1 - [SAE1_RAT]	11.4563	10.6	1	4	4	7	1.07716e+06	349	38.4885	5.16064
Q5U1Y2	Protein Rac2 OS=Rattus norvegicus GN=Rac2 PE=2 SV=1 - [Q5U1Y2_RAT]	11.4358	10.94	7	1	2	5	1.56512e+06	192	21.4271	7.60596
D3ZD23	ATP-binding cassette, sub-family E (OABP), member 1 OS=Rattus norvegicus GN=Abce1 PE=3 SV=1 - [D3ZD23_RAT]	11.4042	4.01	1	2	2	5	264628	599	67.257	8.33838
Q9ESH1	26S proteasome subunit S5a OS=Rattus norvegicus GN=Psmd4 PE=2 SV=1 - [Q9ESH1_RAT]	11.3806	9.02	2	3	3	5	1.5313e+06	377	40.7052	4.79248
Q5RJR8	Leucine-rich repeat-containing protein 59 OS=Rattus norvegicus GN=Lrrc59 PE=1 SV=1 - [LRC59_RAT]	11.3125	13.36	1	4	4	5	3.23251e+06	307	34.8477	9.5249
Q6AYU3	DnaJ homolog subfamily B member 6 OS=Rattus norvegicus GN=Dnajb6 PE=1 SV=1 - [DNJB6_RAT]	11.3118	6.44	1	1	2	5	8.39682e+06	357	38.8984	9.36377
F1LW77	Protein Rab33b OS=Rattus norvegicus GN=Rab33b PE=3 SV=2 - [F1LW77_RAT]	11.3055	8.3	14	1	2	7	7.00731e+06	229	25.7358	7.69385
Q62940	E3 ubiquitin-protein ligase NEDD4 OS=Rattus norvegicus GN=Nedd4 PE=1 SV=1 - [NEDD4_RAT]	11.2806	2.37	4	2	2	4	783673	887	102.331	5.21143
P81155	Voltage-dependent anion-selective channel protein 2 OS=Rattus norvegicus GN=Vdac2 PE=1 SV=2 - [VDAC2_RAT]	11.0906	18.64	2	3	4	5	1.83536e+06	295	31.7256	7.48877
P97521	Mitochondrial carnitine/acylcarnitine carrier protein OS=Rattus norvegicus GN=Slc25a20 PE=1 SV=1 - [MCAT_RAT]	11.0872	14.29	2	6	6	9	5.7504e+06	301	33.1322	9.48096
Q6AYG5	Ethylmalonyl-CoA decarboxylase OS=Rattus norvegicus GN=Echdc1 PE=1 SV=1 - [ECHD1_RAT]	11.0705	16.05	1	4	4	5	619130	299	32.61	7.03467
G3V7Q7	IQ motif containing GTPase activating protein 1 (Predicted), isoform CRA_b OS=Rattus norvegicus GN=Iqgap1 PE=4 SV=1 - [G3V7Q7_RAT]	10.9925	3.38	2	5	5	6	1.11888e+06	1657	188.714	6.43018
Q2VC85	Glutamate cysteine ligase modifier subunit (Fragment) OS=Rattus norvegicus GN=Gclm PE=2 SV=1 - [Q2VC85_RAT]	10.9905	13.6	2	3	3	7	2.40908e+06	228	25.5551	4.93213
D3ZCH7	Adducin 3 (Gamma), isoform CRA_b OS=Rattus norvegicus GN=Add3 PE=2 SV=2 - [D3ZCH7_RAT]	10.9862	7.43	4	4	4	5	933908	673	75.3283	6.43018
F1M7T6	Uncharacterized protein OS=Rattus norvegicus GN=Ssr3 PE=2 SV=2 - [F1M7T6_RAT]	10.8828	7.65	2	1	1	3	927205	183	20.4387	9.26123
Q63362	NADH dehydrogenase [ubiquinone] 1 alpha subcomplex subunit 5 OS=Rattus norvegicus GN=Ndufa5 PE=1 SV=3 - [NDUA5_RAT]	10.8729	28.45	1	4	4	6	3.74024e+06	116	13.4033	7.43018
Q66H18	Protein Sypl1 OS=Rattus norvegicus GN=Sypl1 PE=2 SV=1 - [Q66H18_RAT]	10.8672	7.75	1	2	2	5	1.83952e+06	258	28.6096	8.92432
F1LQM9	Protein Xpo7 OS=Rattus norvegicus GN=Xpo7 PE=2 SV=2 - [F1LQM9_RAT]	10.8371	3.58	2	4	4	5	819668	1090	124.102	6.40479
B0BN93	26S proteasome non-ATPase regulatory subunit 13 OS=Rattus norvegicus GN=Psmd13 PE=1 SV=1 - [PSD13_RAT]	10.8286	17.02	1	7	7	7	3.22703e+06	376	42.7902	5.8335
Q4G017	Nischarin OS=Rattus norvegicus GN=Nisch PE=2 SV=2 - [NISCH_RAT]	10.7989	2.26	1	3	3	6	518743	1502	166.399	5.37646
P10111	Peptidyl-prolyl cis-trans isomerase A OS=Rattus norvegicus GN=Ppia PE=1 SV=2 - [PPIA_RAT]	10.7932	25.61	2	4	4	8	8.4884e+06	164	17.8628	8.1626
B1WC21	Fbln1 protein OS=Rattus norvegicus GN=Fbln1 PE=2 SV=1 - [B1WC21_RAT]	10.7614	4.38	2	3	3	6	1.4196e+06	685	75.3301	5.23682
Q6P6Q7	Signal transducer and activator of transcription 1 OS=Rattus norvegicus GN=Stat1 PE=2 SV=1 - [Q6P6Q7_RAT]	10.7524	4.07	5	3	3	6	1.72927e+06	712	83.0583	6.15088
P51583	Multifunctional protein ADE2 OS=Rattus norvegicus GN=Paics PE=2 SV=3 - [PUR6_RAT]	10.7381	8.71	2	4	4	6	2.93602e+06	425	47.0661	7.69385
Q3B7V5	Protein Rab2b OS=Rattus norvegicus GN=Rab2b PE=2 SV=1 - [Q3B7V5_RAT]	10.659	20	4	3	3	4	993008	215	24.07	6.78564
D4A781	Protein Ipo5 OS=Rattus norvegicus GN=Ipo5 PE=4 SV=1 - [D4A781_RAT]	10.6039	3.01	3	3	3	5	1.02845e+06	1097	123.626	4.95752
D3ZTH8	Protein LOC689899 OS=Rattus norvegicus GN=LOC689899 PE=3 SV=1 - [D3ZTH8_RAT]	10.5951	18.59	11	3	3	6	5.62748e+06	156	17.7421	10.3892
O54783	Choline/ethanolamine kinase OS=Rattus norvegicus GN=Chkb PE=1 SV=3 - [CHKB_RAT]	10.5698	8.12	1	3	3	6	1.2499e+06	394	45.0714	5.32568
P07154	Cathepsin L1 OS=Rattus norvegicus GN=Ctsl1 PE=1 SV=2 - [CATL1_RAT]	10.5453	4.79	1	1	1	3	1.06024e+06	334	37.636	6.82959
P63036	DnaJ homolog subfamily A member 1 OS=Rattus norvegicus GN=Dnaja1 PE=2 SV=1 - [DNJA1_RAT]	10.5316	8.06	2	2	3	4	1.0701e+06	397	44.8395	7.07861
Q78P75	Dynein light chain 2, cytoplasmic OS=Rattus norvegicus GN=Dynll2 PE=1 SV=1 - [DYL2_RAT]	10.5055	32.58	1	1	3	7	1.34715e+07	89	10.3431	7.37158
D3ZFP4	Protein Mcm3 OS=Rattus norvegicus GN=Mcm3 PE=3 SV=2 - [D3ZFP4_RAT]	10.4914	6.88	1	5	5	6	817136	814	91.5654	5.5542
M0R9U5	Protein LOC100911422 (Fragment) OS=Rattus norvegicus GN=LOC100911422 PE=4 SV=1 - [M0R9U5_RAT]	10.4745	10.03	2	3	3	5	901457	329	37.7562	5.85889
I6L9H8	Stub1 protein OS=Rattus norvegicus GN=Stub1 PE=2 SV=1 - [I6L9H8_RAT]	10.4018	9.38	2	2	2	4	1.7126e+06	224	25.3817	7.15186
D3ZXI2	Uncharacterized protein OS=Rattus norvegicus PE=4 SV=2 - [D3ZXI2_RAT]	10.3984	9.05	4	2	2	5	5.26778e+06	243	27.2788	7.75244
F7FLF2	Protein LOC100360057 (Fragment) OS=Rattus norvegicus GN=Rpl22 PE=4 SV=1 - [F7FLF2_RAT]	10.3535	23.62	3	3	3	5	2.27118e+07	127	14.6487	9.18799
B3SVE6	Neuroprotective protein 9 (Fragment) OS=Rattus norvegicus GN=Commd9 PE=2 SV=1 - [B3SVE6_RAT]	10.3518	6.06	2	1	1	4	852725	198	22.0115	6.27783
B5DFN4	Prefoldin 5 (Predicted), isoform CRA_a OS=Rattus norvegicus GN=Pfdn5 PE=2 SV=1 - [B5DFN4_RAT]	10.2999	29.22	1	4	4	4	2.76139e+06	154	17.315	6.32861
Q5U2N2	Ubiquitin carboxyl-terminal hydrolase OS=Rattus norvegicus GN=Usp14 PE=2 SV=1 - [Q5U2N2_RAT]	10.2946	2.84	1	1	1	4	357228	493	55.9409	5.19873
Q6IG02	Keratin, type II cytoskeletal 2 epidermal OS=Rattus norvegicus GN=Krt2 PE=2 SV=1 - [K22E_RAT]	10.2889	4.53	3	2	3	4	6.02352e+06	685	69.0852	7.69385
P50475	Alanine--tRNA ligase, cytoplasmic OS=Rattus norvegicus GN=Aars PE=1 SV=3 - [SYAC_RAT]	10.2634	4.55	1	4	4	6	1.26087e+06	968	106.723	5.61768
E9PTI1	Protein Atp6v1h OS=Rattus norvegicus GN=Atp6v1h PE=2 SV=1 - [E9PTI1_RAT]	10.2155	8.39	2	3	3	4	798832	441	50.7926	6.68311
Q9EPC6	Profilin-2 OS=Rattus norvegicus GN=Pfn2 PE=1 SV=3 - [PROF2_RAT]	10.2098	19.29	2	2	2	3	4.68911e+06	140	14.9923	6.99072
B4F7C9	Protein Stt3a OS=Rattus norvegicus GN=Stt3a PE=2 SV=1 - [B4F7C9_RAT]	10.189	5.82	1	4	4	5	2.34039e+06	705	80.5449	8.104
P26772	10 kDa heat shock protein, mitochondrial OS=Rattus norvegicus GN=Hspe1 PE=1 SV=3 - [CH10_RAT]	10.1269	23.53	2	2	2	3	7.48661e+06	102	10.8949	8.92432
Q5RJN0	NADH dehydrogenase (Ubiquinone) Fe-S protein 7 OS=Rattus norvegicus GN=Ndufs7 PE=2 SV=1 - [Q5RJN0_RAT]	10.0906	13.3	1	2	2	5	1.10323e+06	218	23.9294	9.99365
D4ABC7	Protein Uprt OS=Rattus norvegicus GN=Uprt PE=4 SV=1 - [D4ABC7_RAT]	9.9582	16.83	1	4	4	5	2.12811e+06	309	34.2201	6.01123
B2RYF6	Cleft lip and palate associated transmembrane protein 1 OS=Rattus norvegicus GN=Clptm1 PE=2 SV=1 - [B2RYF6_RAT]	9.91906	3.92	1	2	2	4	1.50851e+06	664	75.2288	6.01123
B5DFK1	Copa protein OS=Rattus norvegicus GN=Copa PE=2 SV=1 - [B5DFK1_RAT]	9.88897	3.19	3	4	4	5	715412	1224	138.273	7.57666
O89049	Thioredoxin reductase 1, cytoplasmic OS=Rattus norvegicus GN=Txnrd1 PE=1 SV=5 - [TRXR1_RAT]	9.88394	6.61	1	3	3	4	2.20568e+06	499	54.6367	6.46826
P07895	Superoxide dismutase [Mn], mitochondrial OS=Rattus norvegicus GN=Sod2 PE=1 SV=2 - [SODM_RAT]	9.88188	17.12	2	3	3	6	4.60208e+06	222	24.6586	8.80713
P63074	Eukaryotic translation initiation factor 4E OS=Rattus norvegicus GN=Eif4e PE=1 SV=1 - [IF4E_RAT]	9.82724	13.36	1	2	2	4	1.91232e+06	217	25.0375	6.15088
P97834	COP9 signalosome complex subunit 1 OS=Rattus norvegicus GN=Gps1 PE=1 SV=1 - [CSN1_RAT]	9.82389	9.77	1	4	4	4	2.41545e+06	471	53.3941	6.84424
Q9JJ31	Cullin-5 OS=Rattus norvegicus GN=Cul5 PE=1 SV=3 - [CUL5_RAT]	9.82347	7.82	1	6	6	6	953340	780	90.8323	7.94287
B5DES0	Protein Snrpd2 OS=Rattus norvegicus GN=Snrpd2 PE=4 SV=1 - [B5DES0_RAT]	9.79466	16.95	2	2	2	4	2.73258e+06	118	13.5182	9.90576
Q9WVS2	Probable tRNA threonylcarbamoyladenosine biosynthesis protein Osgep (Fragment) OS=Rattus norvegicus GN=Osgep PE=2 SV=1 - [OSGEP_RAT]	9.79308	17.08	2	5	5	6	1.46235e+06	322	34.6274	6.22705
B2RYN3	Eukaryotic translation elongation factor 1 epsilon 1 OS=Rattus norvegicus GN=Eef1e1 PE=2 SV=1 - [B2RYN3_RAT]	9.75739	22.99	1	4	4	6	3.29767e+06	174	19.8304	8.1626
M0RA26	Protein LOC100362987 OS=Rattus norvegicus GN=LOC100362987 PE=4 SV=1 - [M0RA26_RAT]	9.74191	38.1	4	3	3	5	2.16253e+06	84	9.50993	9.70068
P80254	D-dopachrome decarboxylase OS=Rattus norvegicus GN=Ddt PE=1 SV=3 - [DOPD_RAT]	9.67113	29.66	1	3	3	5	2.14247e+06	118	13.1248	6.53662
B1H268	Mini-chromosome maintenance complex-binding protein OS=Rattus norvegicus GN=Mcmbp PE=2 SV=1 - [MCMBP_RAT]	9.51817	5.45	2	3	3	4	938241	642	72.9609	5.87158
B2RYV5	RGD1562502 protein (Fragment) OS=Rattus norvegicus GN=RGD1562502 PE=2 SV=1 - [B2RYV5_RAT]	9.50617	18.04	2	4	4	5	3.23642e+06	194	22.0499	4.91943
D3ZS58	NADH dehydrogenase [ubiquinone] 1 alpha subcomplex subunit 2 OS=Rattus norvegicus GN=Ndufa2 PE=3 SV=1 - [D3ZS58_RAT]	9.4843	40.21	1	4	4	7	2.54297e+06	97	10.8378	9.71533
Q4KM41	Ewing sarcoma breakpoint region 1 OS=Rattus norvegicus GN=Ewsr1 PE=2 SV=1 - [Q4KM41_RAT]	9.4711	4.42	3	1	1	3	1.71652e+06	317	33.054	9.90576
M0RBX8	Uncharacterized protein (Fragment) OS=Rattus norvegicus PE=4 SV=1 - [M0RBX8_RAT]	9.46976	14.63	2	1	1	3	715794	82	9.3709	8.20654
D3Z941	Protein Mars OS=Rattus norvegicus GN=Mars PE=3 SV=1 - [D3Z941_RAT]	9.45529	3.88	1	3	3	5	673071	902	101.517	6.45557
Q9WV25-2	Isoform 2 of Poly(U)-binding-splicing factor PUF60 OS=Rattus norvegicus GN=Puf60 - [PUF60_RAT]	9.45242	4.02	2	2	2	4	738788	547	58.508	5.35107
Q66H39	ATP-binding cassette sub-family F member 3 OS=Rattus norvegicus GN=Abcf3 PE=2 SV=1 - [ABCF3_RAT]	9.37769	2.68	1	2	2	4	1.97283e+06	709	79.8063	6.46826
P28073	Proteasome subunit beta type-6 OS=Rattus norvegicus GN=Psmb6 PE=1 SV=3 - [PSB6_RAT]	9.3738	13.03	1	3	3	4	1.00108e+06	238	25.2734	4.99561
D4A565	NADH dehydrogenase (Ubiquinone) 1 beta subcomplex, 5 (Predicted), isoform CRA_b OS=Rattus norvegicus GN=Ndufb5 PE=4 SV=1 - [D4A565_RAT]	9.31314	12.7	1	2	2	4	1.57859e+06	189	21.6505	9.46631
G3V836	Clusterin OS=Rattus norvegicus GN=Clu PE=3 SV=1 - [G3V836_RAT]	9.30396	8.5	5	3	3	4	1.98614e+06	447	51.3873	5.80811
P80385	5'-AMP-activated protein kinase subunit gamma-1 OS=Rattus norvegicus GN=Prkag1 PE=1 SV=3 - [AAKG1_RAT]	9.30198	9.39	1	2	3	4	1.71709e+06	330	37.3627	6.96143
P21708	Mitogen-activated protein kinase 3 OS=Rattus norvegicus GN=Mapk3 PE=1 SV=5 - [MK03_RAT]	9.21935	17.11	21	4	6	7	2.71591e+06	380	43.0531	6.60986
D3ZFJ6	Lactamase, beta (Predicted) OS=Rattus norvegicus GN=Lactb PE=4 SV=1 - [D3ZFJ6_RAT]	9.21907	3.82	1	2	2	4	805861	550	60.382	8.82178
B5DF55	Protein Stam OS=Rattus norvegicus GN=Stam PE=2 SV=1 - [B5DF55_RAT]	9.16545	4.02	2	2	2	4	706909	547	59.5544	4.85596
P62161	Calmodulin OS=Rattus norvegicus GN=Calm1 PE=1 SV=2 - [CALM_RAT]	9.13213	16.78	3	3	3	5	2.08135e+06	149	16.8268	4.22119
Q6MGC4	H2-K region expressed gene 2, rat orthologue OS=Rattus norvegicus GN=Pfdn6 PE=4 SV=1 - [Q6MGC4_RAT]	9.10004	25.2	1	3	3	4	1.30424e+06	127	14.4888	8.88037
Q9Z1J7	Protein Slc1a5 OS=Rattus norvegicus GN=Slc1a5 PE=2 SV=1 - [Q9Z1J7_RAT]	9.0926	6.49	3	3	3	4	1.41567e+06	539	56.7181	7.45947
F1LR10	Epithelial protein lost in neoplasm OS=Rattus norvegicus GN=Lima1 PE=2 SV=2 - [F1LR10_RAT]	9.08646	5.3	2	4	4	7	2.85499e+06	755	83.7459	6.25244
M0R637	Protein LOC679091 (Fragment) OS=Rattus norvegicus GN=LOC679091 PE=4 SV=1 - [M0R637_RAT]	9.07244	8.21	1	2	2	4	1.74466e+06	268	30.6627	7.13721
P62142	Serine/threonine-protein phosphatase PP1-beta catalytic subunit OS=Rattus norvegicus GN=Ppp1cb PE=1 SV=3 - [PP1B_RAT]	9.06669	12.84	7	1	4	6	1.05943e+06	327	37.1626	6.18896
D3ZSE0	40S ribosomal protein S21 OS=Rattus norvegicus GN=LOC100363012 PE=3 SV=1 - [D3ZSE0_RAT]	9.03144	12.05	3	1	1	4	1.04724e+06	83	9.09351	8.51416
B0BNG0	ER membrane protein complex subunit 2 OS=Rattus norvegicus GN=Emc2 PE=2 SV=1 - [EMC2_RAT]	9.03036	7.41	1	2	2	5	1.94773e+06	297	34.8474	6.81494
P02683	Neuron-specific protein family member 1 OS=Rattus norvegicus GN=Nsg1 PE=2 SV=2 - [NSG1_RAT]	8.98696	5.95	1	1	1	3	159090	185	20.9298	6.21436
B3DMA0	Tumor protein p53-inducible protein 11 OS=Rattus norvegicus GN=Tp53i11 PE=2 SV=1 - [P5I11_RAT]	8.98198	5.29	1	1	1	4	7.4932e+06	189	20.9254	9.40771
Q9Z142	Transmembrane protein 33 OS=Rattus norvegicus GN=Tmem33 PE=2 SV=1 - [TMM33_RAT]	8.97721	15.38	1	4	4	5	1.76848e+06	247	27.9648	9.65674
B2RYM5	Lys-63-specific deubiquitinase BRCC36 OS=Rattus norvegicus GN=Brcc3 PE=2 SV=1 - [BRCC3_RAT]	8.95888	7.9	1	2	2	3	2.23181e+06	291	32.9947	6.26514
Q562C3	Glycine C-acetyltransferase (2-amino-3-ketobutyrate-coenzyme A ligase) OS=Rattus norvegicus GN=Gcat PE=2 SV=1 - [Q562C3_RAT]	8.9515	8.17	2	3	3	4	1.17193e+06	416	45.1942	7.6499
Q5XI67	F-box only protein 30 OS=Rattus norvegicus GN=Fbxo30 PE=2 SV=1 - [FBX30_RAT]	8.913	3.23	1	2	2	3	778569	742	81.9583	5.19873
P32198	Carnitine O-palmitoyltransferase 1, liver isoform OS=Rattus norvegicus GN=Cpt1a PE=1 SV=2 - [CPT1A_RAT]	8.90956	6.21	1	4	4	4	834999	773	88.0687	8.54346
Q5U2X8	Acyl-CoA thioesterase 9 OS=Rattus norvegicus GN=Acot9 PE=2 SV=1 - [Q5U2X8_RAT]	8.88915	4.33	1	2	2	4	1.27827e+06	439	50.4109	8.63135
F7ELI0	Protein Drg1 OS=Rattus norvegicus GN=Drg1 PE=4 SV=1 - [F7ELI0_RAT]	8.88707	13.62	3	4	4	4	1.57389e+06	367	40.5009	8.98291
D3ZLH9	Protein LOC680385 OS=Rattus norvegicus GN=LOC680385 PE=4 SV=1 - [D3ZLH9_RAT]	8.82138	2.74	3	1	1	3	777149	402	46.4841	9.64209
D4AEH9	Amylo-1, 6-glucosidase, 4-alpha-glucanotransferase (Glycogen debranching enzyme, glycogen storage disease type III) (Predicted), isoform CRA_a OS=Rattus norvegicus GN=Agl PE=4 SV=1 - [D4AEH9_RAT]	8.78268	2.35	1	3	3	3	559632	1532	174.22	6.7417
Q5U214	Protein Snrpa OS=Rattus norvegicus GN=Snrpa PE=2 SV=1 - [Q5U214_RAT]	8.75965	6.41	2	2	2	4	4.04961e+06	281	31.1562	9.83252
Q6AYA6	Uncharacterized protein C17orf62 homolog OS=Rattus norvegicus PE=2 SV=1 - [CQ062_RAT]	8.75729	11.76	1	2	2	4	552399	187	20.8809	8.5874
Q5XID1	Anamorsin OS=Rattus norvegicus GN=Ciapin1 PE=2 SV=1 - [CPIN1_RAT]	8.75551	3.88	1	1	1	4	2.29315e+06	309	33.0205	5.43994
Q63016	Large neutral amino acids transporter small subunit 1 OS=Rattus norvegicus GN=Slc7a5 PE=1 SV=2 - [LAT1_RAT]	8.72743	5.27	1	2	2	3	3.20357e+06	512	55.8667	7.89893
F1MAA5	Protein Rangap1 OS=Rattus norvegicus GN=Rangap1 PE=4 SV=2 - [F1MAA5_RAT]	8.71845	10.41	2	5	5	5	797206	586	63.1033	4.71631
A3E0T0	Erythrocyte protein band 4.1-like 3 OS=Rattus norvegicus GN=Epb4.1l3 PE=2 SV=1 - [A3E0T0_RAT]	8.71336	1.49	4	1	1	3	203954	870	96.8922	5.2876
D3ZE15	Protein Ndufa13 OS=Rattus norvegicus GN=LOC100911483 PE=4 SV=1 - [D3ZE15_RAT]	8.68206	7.64	2	1	1	3	662467	144	16.7657	9.48096
Q6Q0N1	Cytosolic non-specific dipeptidase OS=Rattus norvegicus GN=Cndp2 PE=1 SV=1 - [CNDP2_RAT]	8.60082	9.05	1	4	4	4	907779	475	52.6596	5.65576
P62963	Profilin-1 OS=Rattus norvegicus GN=Pfn1 PE=1 SV=2 - [PROF1_RAT]	8.59436	18.57	1	2	2	3	961362	140	14.9475	8.27979
P19234	NADH dehydrogenase [ubiquinone] flavoprotein 2, mitochondrial OS=Rattus norvegicus GN=Ndufv2 PE=1 SV=2 - [NDUV2_RAT]	8.57815	12.1	1	3	3	4	3.38391e+06	248	27.3609	6.68311
B2RZ68	Protein Dcaf7 OS=Rattus norvegicus GN=Dcaf7 PE=2 SV=1 - [B2RZ68_RAT]	8.54276	5.85	1	2	2	4	1.57522e+06	342	38.9011	5.51611
Q641W4	Replication factor C subunit 2 OS=Rattus norvegicus GN=Rfc2 PE=2 SV=1 - [RFC2_RAT]	8.51112	12.32	2	4	4	4	813730	349	38.6319	6.63916
F1M9V7	Protein Npepps OS=Rattus norvegicus GN=Npepps PE=2 SV=1 - [F1M9V7_RAT]	8.49616	4.35	3	4	4	4	749731	920	103.279	5.77002
B2GUZ3	Mthfd1l protein OS=Rattus norvegicus GN=Mthfd1l PE=2 SV=1 - [B2GUZ3_RAT]	8.46736	3.17	1	2	2	3	402647	977	105.776	7.50342
B0K020	CDGSH iron-sulfur domain-containing protein 1 OS=Rattus norvegicus GN=Cisd1 PE=3 SV=1 - [CISD1_RAT]	8.45113	25.93	1	2	2	3	1.65153e+06	108	12.0891	8.83643
Q6RJR6-2	Isoform 2 of Reticulon-3 OS=Rattus norvegicus GN=Rtn3 - [RTN3_RAT]	8.44788	8.02	6	2	2	7	1.48806e+07	237	25.4145	8.49951
Q4KM74	Vesicle-trafficking protein SEC22b OS=Rattus norvegicus GN=Sec22b PE=1 SV=3 - [SC22B_RAT]	8.41685	15.35	1	3	3	3	2.91977e+06	215	24.7248	8.51416
Q641X3	Beta-hexosaminidase subunit alpha OS=Rattus norvegicus GN=Hexa PE=2 SV=1 - [HEXA_RAT]	8.36584	3.41	1	2	2	4	1.50825e+06	528	60.4994	7.23975
B5DF29	Protein Rfc5 OS=Rattus norvegicus GN=Rfc5 PE=2 SV=1 - [B5DF29_RAT]	8.35486	9.76	1	3	3	4	1.24079e+06	338	38.0739	7.81104
P84817-3	Isoform 3 of Mitochondrial fission 1 protein OS=Rattus norvegicus GN=Fis1 - [FIS1_RAT]	8.31444	8.97	3	1	1	3	2.67563e+06	145	16.2405	9.24658
Q5FVM2	Glucose-6-phosphatase OS=Rattus norvegicus GN=Psme3 PE=2 SV=1 - [Q5FVM2_RAT]	8.29452	20.47	31	4	5	7	4.5512e+06	254	29.4876	5.94775
Q3B8Q2	Eukaryotic initiation factor 4A-III OS=Rattus norvegicus GN=Eif4a3 PE=1 SV=1 - [IF4A3_RAT]	8.28622	9.49	1	4	4	5	1.90451e+06	411	46.8112	6.72705
G3V6W6	Protein Psmc6 OS=Rattus norvegicus GN=LOC100365869 PE=3 SV=1 - [G3V6W6_RAT]	8.27684	13.4	9	5	6	6	2.54815e+06	403	45.768	7.78174
Q5U1Z2	Trafficking protein particle complex subunit 3 OS=Rattus norvegicus GN=Trappc3 PE=2 SV=1 - [TPPC3_RAT]	8.27656	13.89	1	3	3	4	2.5504e+06	180	20.2892	4.95752
D3ZUX5	Coiled-coil-helix-coiled-coil-helix domain containing 3 (Predicted), isoform CRA_a OS=Rattus norvegicus GN=Chchd3 PE=4 SV=1 - [D3ZUX5_RAT]	8.26472	16.74	1	4	4	7	2.21521e+06	227	26.4182	8.1333
B0BNF4	Kctd6 protein (Fragment) OS=Rattus norvegicus GN=Kctd6 PE=2 SV=1 - [B0BNF4_RAT]	8.23736	11.54	2	3	3	5	1.17875e+06	234	27.2624	6.15088
P09117	Fructose-bisphosphate aldolase C OS=Rattus norvegicus GN=Aldoc PE=1 SV=3 - [ALDOC_RAT]	8.23333	4.41	4	1	2	4	4.35745e+07	363	39.2592	7.12256
P23640	Ras-related protein Rab-27A OS=Rattus norvegicus GN=Rab27a PE=1 SV=1 - [RB27A_RAT]	8.23047	9.95	1	2	2	3	5.26492e+06	221	25.0523	5.24951
Q62991	Sec1 family domain-containing protein 1 OS=Rattus norvegicus GN=Scfd1 PE=1 SV=1 - [SCFD1_RAT]	8.22303	2.04	1	1	1	3	220170	637	72.2171	6.50732
B0BN74	Bag2 protein OS=Rattus norvegicus GN=Bag2 PE=2 SV=1 - [B0BN74_RAT]	8.21208	18.57	2	4	4	5	1.18558e+06	210	23.5611	6.41748
Q99N27	Sorting nexin-1 OS=Rattus norvegicus GN=Snx1 PE=1 SV=1 - [SNX1_RAT]	8.16674	4.6	1	2	2	3	497510	522	59.0078	5.22412
G3V8M5	Serine/threonine-protein phosphatase OS=Rattus norvegicus GN=Ppp4c PE=3 SV=1 - [G3V8M5_RAT]	8.10606	8.79	2	1	2	3	465105	307	35.0574	5.05908
Q5XI36	CD97 molecule OS=Rattus norvegicus GN=Cd97 PE=2 SV=1 - [Q5XI36_RAT]	8.09723	2.06	1	1	1	2	1.88119e+06	825	91.0752	7.6792
P85515	Alpha-centractin OS=Rattus norvegicus GN=Actr1a PE=1 SV=1 - [ACTZ_RAT]	8.05634	6.91	2	2	3	7	2.89969e+08	376	42.5869	6.63916
Q9ES53	Ubiquitin fusion degradation protein 1 homolog OS=Rattus norvegicus GN=Ufd1l PE=1 SV=1 - [UFD1_RAT]	8.05203	10.42	1	3	3	4	936829	307	34.4633	6.69775
B2RZD5	Protein LOC688712 OS=Rattus norvegicus GN=Rpl22l1 PE=2 SV=1 - [B2RZD5_RAT]	8.03499	19.67	2	2	2	3	2.40274e+06	122	14.4586	9.45166
P34926	Microtubule-associated protein 1A OS=Rattus norvegicus GN=Map1a PE=1 SV=1 - [MAP1A_RAT]	8.02928	0.79	2	1	2	4	3.85173e+06	2774	299.348	4.94482
O35547	Long-chain-fatty-acid--CoA ligase 4 OS=Rattus norvegicus GN=Acsl4 PE=2 SV=1 - [ACSL4_RAT]	8.01599	5.82	1	2	3	3	661874	670	74.2789	8.01611
Q68FX3	DEAD (Asp-Glu-Ala-Asp) box polypeptide 19a OS=Rattus norvegicus GN=Ddx19a PE=2 SV=1 - [Q68FX3_RAT]	8.00648	7.32	6	3	3	3	1.14153e+06	478	53.8698	6.7417
B5DFI1	Cog1 protein (Fragment) OS=Rattus norvegicus GN=Cog1 PE=2 SV=1 - [B5DFI1_RAT]	7.98475	2.04	2	2	2	3	546512	979	108.502	7.29834
G3V624	Coronin OS=Rattus norvegicus GN=Coro1c PE=3 SV=1 - [G3V624_RAT]	7.96071	4.64	2	2	2	3	409850	474	53.144	7.07861
F1LR87	Beta-hexosaminidase subunit beta OS=Rattus norvegicus GN=Hexb PE=2 SV=2 - [F1LR87_RAT]	7.89476	8.01	2	4	4	4	1.26262e+06	537	61.135	8.47021
Q6P6G9	Hnrpa1 protein OS=Rattus norvegicus GN=Hnrnpa1 PE=2 SV=1 - [Q6P6G9_RAT]	7.87123	7.99	6	1	2	4	1.69708e+06	313	33.599	9.23193
P20788	Cytochrome b-c1 complex subunit Rieske, mitochondrial OS=Rattus norvegicus GN=Uqcrfs1 PE=1 SV=2 - [UCRI_RAT]	7.8321	13.87	1	4	4	5	2.84939e+06	274	29.4272	8.86572
P21707	Synaptotagmin-1 OS=Rattus norvegicus GN=Syt1 PE=1 SV=3 - [SYT1_RAT]	7.80033	12.11	2	5	5	5	775364	421	47.3687	8.41162
D3ZBP3	Exosome component 2 (Predicted) OS=Rattus norvegicus GN=Exosc2 PE=4 SV=1 - [D3ZBP3_RAT]	7.79754	12.97	1	3	3	3	1.50235e+06	293	32.6691	7.50342
P97852	Peroxisomal multifunctional enzyme type 2 OS=Rattus norvegicus GN=Hsd17b4 PE=1 SV=3 - [DHB4_RAT]	7.79618	5.44	2	3	3	3	1.30203e+06	735	79.378	8.57275
Q1JU69	ZH11 protein OS=Rattus norvegicus GN=Cops7a PE=2 SV=1 - [Q1JU69_RAT]	7.76892	10.04	3	2	2	3	1.40416e+06	229	25.3044	8.23584
Q4G061	Eukaryotic translation initiation factor 3 subunit B OS=Rattus norvegicus GN=Eif3b PE=1 SV=1 - [EIF3B_RAT]	7.73394	4.27	1	3	3	5	671211	797	90.854	5.08447
P39052-3	Isoform 3 of Dynamin-2 OS=Rattus norvegicus GN=Dnm2 - [DYN2_RAT]	7.72536	5.08	30	4	4	4	1.24557e+06	866	97.7569	7.62061
F1M6F4	Protein LOC100912210 (Fragment) OS=Rattus norvegicus GN=RGD1564597 PE=4 SV=1 - [F1M6F4_RAT]	7.71772	16.94	3	2	2	3	4.98702e+07	124	13.6356	9.87646
Q6AYQ4	Transmembrane protein 109 OS=Rattus norvegicus GN=Tmem109 PE=2 SV=1 - [TM109_RAT]	7.70761	9.88	2	2	3	4	6.59592e+06	243	26.2254	9.77393
Q4G037	Cdc23 protein (Fragment) OS=Rattus norvegicus GN=Cdc23 PE=2 SV=1 - [Q4G037_RAT]	7.69266	7.2	2	2	2	5	1.43179e+06	250	29.0184	8.32373
Q6P9U0	Protein Serpinb6 OS=Rattus norvegicus GN=Serpinb6 PE=2 SV=1 - [Q6P9U0_RAT]	7.66565	4.75	1	2	2	5	2.39409e+06	379	42.9909	6.1001
Q4AE70-3	Isoform 3 of Histone-arginine methyltransferase CARM1 OS=Rattus norvegicus GN=Carm1 - [CARM1_RAT]	7.65872	5.58	4	3	3	3	1.33516e+06	573	62.4131	6.62451
Q496Z5	Peripherin OS=Rattus norvegicus GN=Prph PE=2 SV=1 - [Q496Z5_RAT]	7.64897	10.06	7	4	5	5	1.75974e+06	467	53.3892	5.40186
P04785	Protein disulfide-isomerase OS=Rattus norvegicus GN=P4hb PE=1 SV=2 - [PDIA1_RAT]	7.6158	11.39	3	5	5	5	882932	509	56.9157	4.93213
G3V712	Keratin complex 2, basic, gene 7, isoform CRA_a OS=Rattus norvegicus GN=Krt7 PE=3 SV=1 - [G3V712_RAT]	7.60514	4.38	10	1	3	5	7.94045e+06	457	50.7751	5.87158
P14942	Glutathione S-transferase alpha-4 OS=Rattus norvegicus GN=Gsta4 PE=1 SV=2 - [GSTA4_RAT]	7.58929	14.41	2	4	4	5	3.18721e+06	222	25.4934	7.32764
Q63151-2	Isoform Short of Long-chain-fatty-acid--CoA ligase 3 OS=Rattus norvegicus GN=Acsl3 - [ACSL3_RAT]	7.56744	4.51	2	2	3	4	586112	709	79.2509	8.35303
D4AC36	Eukaryotic translation initiation factor 3, subunit 5 (Epsilon) (Predicted), isoform CRA_a OS=Rattus norvegicus GN=Eif3f PE=4 SV=2 - [D4AC36_RAT]	7.54828	12.13	1	2	2	3	4.56488e+06	239	24.5344	6.32861
D3ZZV1	Protein Magmas OS=Rattus norvegicus GN=Pam16 PE=4 SV=1 - [D3ZZV1_RAT]	7.5305	19.2	2	2	2	3	1.38351e+06	125	13.7632	9.5249
P24368	Peptidyl-prolyl cis-trans isomerase B OS=Rattus norvegicus GN=Ppib PE=2 SV=3 - [PPIB_RAT]	7.52554	22.22	1	4	4	4	1.37266e+06	216	23.7875	9.49561
Q5U2S7	Proteasome (Prosome, macropain) 26S subunit, non-ATPase, 3 OS=Rattus norvegicus GN=Psmd3 PE=2 SV=1 - [Q5U2S7_RAT]	7.51673	6.6	1	3	3	3	1.29574e+06	530	60.6503	8.44092
Q6P4Z9	COP9 signalosome complex subunit 8 OS=Rattus norvegicus GN=Cops8 PE=2 SV=1 - [CSN8_RAT]	7.49495	7.18	1	1	1	3	402050	209	23.221	5.19873
Q5U2T0	Death associated protein 3 OS=Rattus norvegicus GN=Dap3 PE=2 SV=1 - [Q5U2T0_RAT]	7.42363	11.51	2	4	4	4	631526	391	44.466	8.92432
P13221	Aspartate aminotransferase, cytoplasmic OS=Rattus norvegicus GN=Got1 PE=1 SV=3 - [AATC_RAT]	7.40439	8.47	1	3	3	4	908348	413	46.3995	7.21045
F1LN92	Protein Afg3l2 OS=Rattus norvegicus GN=Afg3l2 PE=2 SV=1 - [F1LN92_RAT]	7.40439	2.37	1	1	1	3	84535.5	802	89.2955	8.60205
D3ZJH9	Malic enzyme OS=Rattus norvegicus GN=Me2 PE=3 SV=1 - [D3ZJH9_RAT]	7.37983	7.36	2	4	4	4	706925	584	65.3097	7.75244
B2GV33	Maoa protein (Fragment) OS=Rattus norvegicus GN=Maoa PE=2 SV=1 - [B2GV33_RAT]	7.37975	9.62	3	3	3	4	1.8455e+06	520	58.7653	8.07471
Q71DI1	Dermcidin OS=Rattus norvegicus GN=Dcd PE=4 SV=1 - [Q71DI1_RAT]	7.34666	20	1	2	2	3	2.20475e+06	110	11.2768	6.53662
A0JPQ9	Chitinase domain-containing protein 1 OS=Rattus norvegicus GN=Chid1 PE=2 SV=2 - [CHID1_RAT]	7.34015	5.85	2	2	2	3	309867	393	44.8463	7.97217
P17425	Hydroxymethylglutaryl-CoA synthase, cytoplasmic OS=Rattus norvegicus GN=Hmgcs1 PE=1 SV=1 - [HMCS1_RAT]	7.33644	4.23	1	2	2	3	930793	520	57.3974	5.88428
D4AAM0	Protein Tnpo3 OS=Rattus norvegicus GN=Tnpo3 PE=2 SV=2 - [D4AAM0_RAT]	7.33481	3.36	1	3	3	4	1.12142e+06	923	104.117	5.51611
B0BN63	LOC681996 protein OS=Rattus norvegicus GN=LOC681996 PE=2 SV=1 - [B0BN63_RAT]	7.33237	10.95	1	3	3	5	1.5659e+06	338	38.0802	5.52881
B0BMV9	Proteasome (Prosome, macropain) 26S subunit, non-ATPase, 10, isoform CRA_c OS=Rattus norvegicus GN=Psmd10 PE=2 SV=1 - [B0BMV9_RAT]	7.29569	16.94	2	1	1	4	1.90942e+06	124	13.3757	6.04932
P47875	Cysteine and glycine-rich protein 1 OS=Rattus norvegicus GN=Csrp1 PE=2 SV=2 - [CSRP1_RAT]	7.26684	13.99	1	2	2	4	1.07853e+06	193	20.5998	8.57275
P35426	Cyclin-dependent kinase 4 OS=Rattus norvegicus GN=Cdk4 PE=2 SV=1 - [CDK4_RAT]	7.25759	8.25	45	1	2	4	6.49492e+06	303	33.7774	6.53662
Q5U2V8	ER membrane protein complex subunit 3 OS=Rattus norvegicus GN=Emc3 PE=2 SV=3 - [EMC3_RAT]	7.24718	8.43	1	2	2	3	613725	261	29.9604	6.81494
P63095	Guanine nucleotide-binding protein G(s) subunit alpha isoforms short OS=Rattus norvegicus GN=Gnas PE=1 SV=1 - [GNAS2_RAT]	7.24255	6.09	12	1	2	3	2.63537e+06	394	45.6349	5.96045
D3ZH12	Nitric oxide synthase interacting protein (Predicted), isoform CRA_b OS=Rattus norvegicus GN=Nosip PE=4 SV=1 - [D3ZH12_RAT]	7.23237	9.97	1	3	3	4	986788	301	33.2359	8.6167
F1M4I4	Protein Vps51 OS=Rattus norvegicus GN=Vps51 PE=2 SV=2 - [F1M4I4_RAT]	7.22704	4.48	2	3	3	4	294633	781	85.9882	6.23975
O88923-3	Isoform 4 of Latrophilin-2 OS=Rattus norvegicus GN=Lphn2 - [LPHN2_RAT]	7.2183	1.41	11	2	2	4	344664	1420	159.221	6.60986
Q3B8P5	Psmd8 protein (Fragment) OS=Rattus norvegicus GN=Psmd8 PE=2 SV=1 - [Q3B8P5_RAT]	7.2153	8.42	3	3	3	5	1.95582e+06	285	32.3167	6.37939
Q568Z8	Ddx17 protein OS=Rattus norvegicus GN=Ddx17 PE=2 SV=1 - [Q568Z8_RAT]	7.20249	5.22	1	1	1	2	414595	268	28.8588	9.02686
P29147	D-beta-hydroxybutyrate dehydrogenase, mitochondrial OS=Rattus norvegicus GN=Bdh1 PE=1 SV=2 - [BDH_RAT]	7.19063	10.2	1	4	4	4	1.74028e+06	343	38.1773	8.83643
D4A4D5	Protein LOC100362751 OS=Rattus norvegicus GN=LOC498555 PE=4 SV=1 - [D4A4D5_RAT]	7.17871	21.74	3	2	2	2	1.91121e+06	115	11.6989	4.53857
Q63486	Ras-related GTP-binding protein A OS=Rattus norvegicus GN=Rraga PE=1 SV=1 - [RRAGA_RAT]	7.16909	6.07	3	2	2	3	491229	313	36.5426	7.72314
F8WG91	ADP-ribosylation factor-like protein 3 (Fragment) OS=Rattus norvegicus GN=Arl3 PE=3 SV=1 - [F8WG91_RAT]	7.13931	16.57	2	2	2	4	1.86933e+06	181	20.3127	7.23975
O88767	Protein DJ-1 OS=Rattus norvegicus GN=Park7 PE=1 SV=1 - [PARK7_RAT]	7.13705	19.58	3	3	3	4	1.53582e+06	189	19.9614	6.771
P40307	Proteasome subunit beta type-2 OS=Rattus norvegicus GN=Psmb2 PE=1 SV=1 - [PSB2_RAT]	7.11254	7.46	1	1	1	2	1.06756e+06	201	22.8977	7.44482
P63086	Mitogen-activated protein kinase 1 OS=Rattus norvegicus GN=Mapk1 PE=1 SV=3 - [MK01_RAT]	7.1067	9.22	20	1	3	4	1.86995e+06	358	41.2492	6.97607
Q6IMX7	Hsp70-binding protein 1 OS=Rattus norvegicus GN=Hspbp1 PE=2 SV=1 - [HPBP1_RAT]	7.08739	5.6	1	2	2	3	97210.9	357	39.1655	5.2876
G3V804	Sideroflexin 3 OS=Rattus norvegicus GN=Sfxn3 PE=4 SV=1 - [G3V804_RAT]	7.08503	7.79	3	2	2	3	673287	321	35.4286	9.68604
F1LTW0	Uncharacterized protein (Fragment) OS=Rattus norvegicus PE=4 SV=1 - [F1LTW0_RAT]	7.07132	7.03	2	1	1	3	793620	185	21.38	7.43018
Q505J6	Mitochondrial glutamate carrier 2 OS=Rattus norvegicus GN=Slc25a18 PE=2 SV=2 - [GHC2_RAT]	7.05976	9.06	1	1	3	3	1.84784e+06	320	34.1478	9.17334
P36506	Dual specificity mitogen-activated protein kinase kinase 2 OS=Rattus norvegicus GN=Map2k2 PE=2 SV=1 - [MP2K2_RAT]	7.05924	8.25	2	3	3	5	1.49629e+06	400	44.254	7.09326
Q2XTA4	Epidermal fatty acid binding protein 5 (Fragment) OS=Rattus norvegicus GN=Fabp5 PE=2 SV=1 - [Q2XTA4_RAT]	7.04729	8.91	2	1	1	3	594494	101	11.1625	7.02002
P62703	40S ribosomal protein S4, X isoform OS=Rattus norvegicus GN=Rps4x PE=2 SV=2 - [RS4X_RAT]	7.02678	15.97	2	5	5	6	2.77356e+06	263	29.5791	10.1548
Q63803	Guanine nucleotide-binding protein G(s) subunit alpha isoforms XLas OS=Rattus norvegicus GN=Gnas PE=1 SV=3 - [GNAS1_RAT]	6.986	2.01	11	1	2	3	2.60258e+06	1144	122.81	4.81787
Q68FP1-2	Isoform 2 of Gelsolin OS=Rattus norvegicus GN=Gsn - [GELS_RAT]	6.97923	1.5	2	1	1	3		731	80.8784	5.69385
Q6PEC3-2	Isoform 2 of Protein YIF1B OS=Rattus norvegicus GN=Yif1b - [YIF1B_RAT]	6.97357	5.18	4	1	1	2	6.71898e+06	251	27.5503	9.5542
Q6AXT5	Ras-related protein Rab-21 OS=Rattus norvegicus GN=Rab21 PE=2 SV=1 - [RAB21_RAT]	6.97317	12.11	1	2	3	5	2.55431e+06	223	24.1482	7.94287
P07151	Beta-2-microglobulin OS=Rattus norvegicus GN=B2m PE=1 SV=1 - [B2MG_RAT]	6.97188	7.56	1	1	1	3	2.02867e+06	119	13.7111	8.00146
P36201	Cysteine-rich protein 2 OS=Rattus norvegicus GN=Crip2 PE=2 SV=1 - [CRIP2_RAT]	6.95993	7.69	1	1	1	2	998650	208	22.6811	8.63135
Q5XIK2	Thioredoxin-related transmembrane protein 2 OS=Rattus norvegicus GN=Tmx2 PE=2 SV=1 - [TMX2_RAT]	6.95292	13.22	1	4	4	5	1.58582e+06	295	33.8436	8.86572
B0BNG6	Use1 protein (Fragment) OS=Rattus norvegicus GN=Use1 PE=2 SV=1 - [B0BNG6_RAT]	6.9517	4.17	2	1	1	3	603209	264	29.9068	9.23193
Q6PST4	Atlastin-1 OS=Rattus norvegicus GN=Atl1 PE=1 SV=1 - [ATLA1_RAT]	6.9221	3.58	1	2	2	3	1.85349e+06	558	63.3353	6.1001
D4ABT0	Guanine nucleotide-binding protein G(o) subunit alpha OS=Rattus norvegicus GN=Gnao1 PE=2 SV=2 - [D4ABT0_RAT]	6.91684	9.32	18	2	3	4	2.25297e+06	354	39.995	6.01123
E9PU28	Inosine-5'-monophosphate dehydrogenase 2 OS=Rattus norvegicus GN=Impdh2 PE=3 SV=1 - [IMDH2_RAT]	6.88179	4.47	2	2	2	3	1.69664e+06	514	55.7798	7.28369
P62278	40S ribosomal protein S13 OS=Rattus norvegicus GN=Rps13 PE=1 SV=2 - [RS13_RAT]	6.87531	19.21	6	3	3	5	5.01686e+06	151	17.2117	10.5356
E9PSV5	Protein Psat1 OS=Rattus norvegicus GN=Psat1 PE=2 SV=2 - [E9PSV5_RAT]	6.85411	3.78	3	1	1	2	747496	370	40.4649	7.97217
D3Z9A9	Uncharacterized protein (Fragment) OS=Rattus norvegicus PE=4 SV=2 - [D3Z9A9_RAT]	6.8104	10.44	4	2	3	4	1.31863e+06	297	32.3263	7.81104
F1LSV4	Protein Sptlc2 OS=Rattus norvegicus GN=Sptlc2 PE=2 SV=2 - [F1LSV4_RAT]	6.73276	4.11	2	2	2	4	421743	560	62.9409	8.17725
Q6AYA5	Transmembrane protein 106B OS=Rattus norvegicus GN=Tmem106b PE=2 SV=1 - [T106B_RAT]	6.67314	8.36	2	2	2	4	370790	275	31.1325	7.32764
Q0QER8	Isocitrate dehydrogenase [NADP] (Fragment) OS=Rattus norvegicus GN=Idh1 PE=2 SV=1 - [Q0QER8_RAT]	6.65985	8.73	2	2	3	4	2.48792e+06	378	42.6283	6.37939
P15865	Histone H1.4 OS=Rattus norvegicus GN=Hist1h1e PE=1 SV=3 - [H14_RAT]	6.62027	10.5	3	2	2	3	5.17371e+06	219	21.974	11.1069
Q76K24	Ankyrin repeat domain-containing protein 46 OS=Rattus norvegicus GN=Ankrd46 PE=2 SV=1 - [ANR46_RAT]	6.61777	9.65	1	2	2	3	633407	228	25.1649	5.93506
Q9Z2X3	26S proteasome non-ATPase regulatory subunit 10 OS=Rattus norvegicus GN=Psmd10 PE=2 SV=1 - [PSD10_RAT]	6.58678	9.52	1	1	1	2	1.45986e+06	231	24.9697	5.92236
Q63965	Sideroflexin-1 OS=Rattus norvegicus GN=Sfxn1 PE=2 SV=4 - [SFXN1_RAT]	6.55804	7.14	2	2	2	2	2.77532e+06	322	35.5232	9.05615
G3V8G5	Golgi apparatus protein 1 OS=Rattus norvegicus GN=Glg1 PE=4 SV=1 - [G3V8G5_RAT]	6.55365	1.71	2	2	2	3	295784	1171	133.465	6.90283
B2RZD6	Ndufa4 protein OS=Rattus norvegicus GN=Ndufa4 PE=4 SV=1 - [B2RZD6_RAT]	6.53587	24.39	1	2	2	3	4.86286e+06	82	9.32087	9.5249
Q1PS21	Minichromosome maintenance protein 7 OS=Rattus norvegicus GN=Mcm7 PE=2 SV=1 - [Q1PS21_RAT]	6.52884	6.95	2	4	4	4	777481	719	81.0375	6.25244
A8QIC3	DnaJ (Hsp40) homolog, subfamily C, member 9 (Predicted) OS=Rattus norvegicus GN=Dnajc9 PE=2 SV=1 - [A8QIC3_RAT]	6.48012	8.11	1	2	2	3	721814	259	29.9603	7.32764
B2RYP8	A disintegrin and metalloprotease domain 8 (Predicted), isoform CRA_b OS=Rattus norvegicus GN=Tubgcp2 PE=2 SV=1 - [B2RYP8_RAT]	6.47325	3.2	1	3	3	3	730271	905	102.995	6.63916
Q8CFC1	Bifunctional lysine-specific demethylase and histidyl-hydroxylase MINA OS=Rattus norvegicus GN=Mina PE=2 SV=1 - [MINA_RAT]	6.46941	8.82	1	3	3	3	827812	465	53.1822	6.90283
O35567	Bifunctional purine biosynthesis protein PURH OS=Rattus norvegicus GN=Atic PE=1 SV=2 - [PUR9_RAT]	6.45227	3.72	1	2	2	3	302347	592	64.1682	7.13721
G3V7T3	Pantothenate kinase 4 OS=Rattus norvegicus GN=Pank4 PE=4 SV=1 - [G3V7T3_RAT]	6.44305	3.23	2	2	2	3	220927	773	86.1341	6.31592
M0R919	Protein LOC681825 OS=Rattus norvegicus GN=LOC681825 PE=4 SV=1 - [M0R919_RAT]	6.43657	15.03	4	3	3	3	2.33302e+06	173	19.5891	6.07471
Q62876	Synaptogyrin-1 OS=Rattus norvegicus GN=Syngr1 PE=2 SV=1 - [SNG1_RAT]	6.41189	10.26	1	2	2	3	908033	234	25.6523	4.65283
Q2KMM2	Trafficking protein particle complex subunit 1 OS=Rattus norvegicus GN=Trappc1 PE=2 SV=1 - [TPPC1_RAT]	6.40473	18.62	1	3	3	5	1.33021e+06	145	16.8706	9.15869
Q9JJ54-4	Isoform 4 of Heterogeneous nuclear ribonucleoprotein D0 OS=Rattus norvegicus GN=Hnrnpd - [HNRPD_RAT]	6.3973	7.72	8	2	2	3	393227	285	30.451	8.41162
O54772	SWI/SNF-related matrix-associated actin-dependent regulator of chromatin subfamily D member 2 OS=Rattus norvegicus GN=Smarcd2 PE=2 SV=3 - [SMRD2_RAT]	6.38024	3.77	1	1	1	2	177263	531	59.0906	9.64209
Q62651	Delta(3,5)-Delta(2,4)-dienoyl-CoA isomerase, mitochondrial OS=Rattus norvegicus GN=Ech1 PE=1 SV=2 - [ECH1_RAT]	6.37895	5.81	1	2	2	5	1.0374e+06	327	36.1484	7.98682
Q66HC5	Nuclear pore complex protein Nup93 OS=Rattus norvegicus GN=Nup93 PE=1 SV=1 - [NUP93_RAT]	6.36712	3.66	1	3	3	3	826223	819	93.2434	5.71924
Q5U302	Catenin (Cadherin associated protein), alpha 1 OS=Rattus norvegicus GN=Ctnna1 PE=2 SV=1 - [Q5U302_RAT]	6.35637	2.31	2	2	2	3	1.46345e+06	908	100.174	6.22705
Q68A21	Transcriptional activator protein Pur-beta OS=Rattus norvegicus GN=Purb PE=1 SV=3 - [PURB_RAT]	6.34665	9.52	2	2	2	2	624636	315	33.3976	5.42725
D4AEC0	Histone H2A OS=Rattus norvegicus GN=LOC685909 PE=3 SV=1 - [D4AEC0_RAT]	6.34446	12.5	19	2	2	3	4.04607e+06	128	13.5005	10.5796
Q62824	Exocyst complex component 4 OS=Rattus norvegicus GN=Exoc4 PE=1 SV=1 - [EXOC4_RAT]	6.32651	1.44	1	1	1	2	137641	975	110.483	6.49365
Q5XIC6	Proteasome (Prosome, macropain) 26S subunit, non-ATPase, 12 OS=Rattus norvegicus GN=Psmd12 PE=2 SV=1 - [Q5XIC6_RAT]	6.30238	3.29	2	2	2	4	2.15853e+06	456	52.9025	7.35693
Q6GQQ2	PRKCA-binding protein OS=Rattus norvegicus GN=Pick1 PE=1 SV=1 - [Q6GQQ2_RAT]	6.2568	2.88	2	1	1	3		416	46.6757	5.51611
Q5XIP1	Protein pelota homolog OS=Rattus norvegicus GN=Pelo PE=2 SV=1 - [PELO_RAT]	6.24932	3.64	1	1	1	2	143578	385	43.38	5.98584
Q9ES21	Phosphatidylinositide phosphatase SAC1 OS=Rattus norvegicus GN=Sacm1l PE=1 SV=1 - [SAC1_RAT]	6.2489	4.77	1	3	3	3	825335	587	66.996	7.28369
Q923V8	15 kDa selenoprotein OS=Rattus norvegicus GN=Sep15 PE=1 SV=3 - [SEP15_RAT]	6.23263	7.41	1	1	1	2	368038	162	17.8121	5.35107
Q9WUD2	Transient receptor potential cation channel subfamily V member 2 OS=Rattus norvegicus GN=Trpv2 PE=1 SV=2 - [TRPV2_RAT]	6.22417	3.81	1	2	2	2	671860	761	86.6507	6.771
O70420	Cortactin isoform B OS=Rattus norvegicus GN=Cttn PE=2 SV=1 - [O70420_RAT]	6.2155	3.94	4	2	2	3	734340	508	56.8392	5.19873
Q9JMG8	Dihydropyrimidinase-related protein OS=Rattus norvegicus GN=Dpysl5 PE=2 SV=1 - [Q9JMG8_RAT]	6.19685	9.41	3	5	5	5	3.40334e+06	563	61.3561	6.97607
P62836	Ras-related protein Rap-1A OS=Rattus norvegicus GN=Rap1a PE=1 SV=1 - [RAP1A_RAT]	6.18343	15.22	4	3	3	3	1.63578e+06	184	20.9737	6.66846
B1WBY1	Cul1 protein OS=Rattus norvegicus GN=Cul1 PE=2 SV=1 - [B1WBY1_RAT]	6.17464	6.06	1	5	5	7	1.58912e+06	776	89.635	8.00146
Q3KR86	Mitochondrial inner membrane protein (Fragment) OS=Rattus norvegicus GN=Immt PE=1 SV=1 - [IMMT_RAT]	6.16682	2.13	1	1	1	3	284756	609	67.1352	5.79541
Q5D023	Dync1li2 protein OS=Rattus norvegicus GN=Dync1li2 PE=2 SV=1 - [Q5D023_RAT]	6.16189	7.52	6	3	3	3	1.49209e+06	492	54.0805	6.16357
D3ZYQ8	Uridine kinase OS=Rattus norvegicus GN=Uckl1 PE=3 SV=1 - [D3ZYQ8_RAT]	6.13907	9.12	1	5	5	7	2.064e+06	548	60.7883	7.15186
B5DF60	Eukaryotic translation initiation factor 1A, Y-linked OS=Rattus norvegicus GN=Eif1ax PE=2 SV=1 - [B5DF60_RAT]	6.13447	14.58	3	2	2	4	2.37569e+06	144	16.4502	5.23682
D3ZT01	Protein Cog2 OS=Rattus norvegicus GN=Cog2 PE=4 SV=1 - [D3ZT01_RAT]	6.11409	3.56	1	2	2	3	240287	730	81.7533	6.59521
Q66H50	Fatty acyl-CoA reductase 1 OS=Rattus norvegicus GN=Far1 PE=2 SV=1 - [FACR1_RAT]	6.10567	4.85	1	2	2	2	842126	515	59.2297	9.21729
B5DF03	Peptidyl-prolyl cis-trans isomerase (Fragment) OS=Rattus norvegicus GN=Fkbp3 PE=2 SV=1 - [B5DF03_RAT]	6.07732	5	2	1	1	2	1.26919e+06	220	24.8191	9.27588
D3ZV40	Protein Unk OS=Rattus norvegicus GN=Unk PE=2 SV=1 - [D3ZV40_RAT]	6.06766	3.09	1	2	2	3	1.02847e+06	810	88.0108	6.87354
D3ZF12	Signal peptidase complex subunit 3 OS=Rattus norvegicus GN=Spcs3 PE=4 SV=1 - [D3ZF12_RAT]	6.04819	12.78	1	2	2	3	729344	180	20.3146	8.6167
D3ZLK9	ATP-dependent (S)-NAD(P)H-hydrate dehydratase OS=Rattus norvegicus GN=Carkd PE=3 SV=1 - [D3ZLK9_RAT]	6.04293	3.98	2	1	1	2	647255	327	34.9401	7.94287
O08623-2	Isoform 2 of Sequestosome-1 OS=Rattus norvegicus GN=Sqstm1 - [SQSTM_RAT]	6.04036	3.88	2	1	1	2	226766	412	44.9726	5.26221
Q6AXY8	Dehydrogenase/reductase (SDR family) member 1 OS=Rattus norvegicus GN=Dhrs1 PE=2 SV=1 - [Q6AXY8_RAT]	6.03662	7.35	1	2	2	2	1.35207e+06	313	33.9934	8.20654
M0R5H9	Uncharacterized protein OS=Rattus norvegicus PE=4 SV=1 - [M0R5H9_RAT]	6.01189	6.9	3	2	2	2	1.05531e+06	319	34.4568	9.5542
M0R7L5	Protein LOC100912008 (Fragment) OS=Rattus norvegicus GN=LOC100912008 PE=4 SV=1 - [M0R7L5_RAT]	6.00083	12.2	4	3	3	3	2.44281e+06	254	28.7652	8.86572
Q80W92	Protein VAC14 homolog OS=Rattus norvegicus GN=Vac14 PE=1 SV=1 - [VAC14_RAT]	5.97549	2.17	1	2	2	3	538344	783	88.0116	6.12549
P14056	Serine/threonine-protein kinase A-Raf OS=Rattus norvegicus GN=Araf PE=2 SV=1 - [ARAF_RAT]	5.96816	5.79	4	3	3	4	530219	604	67.5084	9.11475
D3ZG58	Uncharacterized protein OS=Rattus norvegicus GN=Zwilch PE=4 SV=2 - [D3ZG58_RAT]	5.96762	6.76	1	4	4	5	438013	592	67.7467	6.771
Q6P3V8	Eukaryotic translation initiation factor 4A1 OS=Rattus norvegicus GN=Eif4a1 PE=2 SV=1 - [Q6P3V8_RAT]	5.96392	4.19	3	2	2	3	2.24623e+06	406	46.1246	5.47803
Q6AY49	Protein Tusc3 OS=Rattus norvegicus GN=Tusc3 PE=2 SV=1 - [Q6AY49_RAT]	5.95308	5.48	1	2	2	3	1.23797e+06	347	39.5125	10.1108
P18421	Proteasome subunit beta type-1 OS=Rattus norvegicus GN=Psmb1 PE=1 SV=3 - [PSB1_RAT]	5.94867	9.58	2	2	2	3	2.21995e+06	240	26.4623	7.35693
D3ZH41	Cytoskeleton-associated protein 4 (Predicted) OS=Rattus norvegicus GN=Ckap4 PE=4 SV=2 - [D3ZH41_RAT]	5.93806	9.51	1	3	3	3	1.55788e+06	326	36.2937	4.81787
G3V9P0	26S proteasome non-ATPase regulatory subunit 9 OS=Rattus norvegicus GN=Psmd9 PE=4 SV=1 - [G3V9P0_RAT]	5.93501	4.5	2	1	1	3	2.4325e+06	222	24.7996	6.88818
Q5XI77	Annexin OS=Rattus norvegicus GN=Anxa11 PE=2 SV=1 - [Q5XI77_RAT]	5.88222	6.56	2	3	3	4	378813	503	54.1258	7.6499
D3Z8J0	Protein RGD1564425 OS=Rattus norvegicus GN=RGD1564425 PE=4 SV=1 - [D3Z8J0_RAT]	5.85592	7.8	3	1	1	2	585140	205	23.0305	6.18896
O35952-2	Isoform 2 of Hydroxyacylglutathione hydrolase, mitochondrial OS=Rattus norvegicus GN=Hagh - [GLO2_RAT]	5.84175	7.69	3	2	2	3	707154	260	28.8778	6.94678
B0BMV4	Protein Yif1a OS=Rattus norvegicus GN=Yif1 PE=2 SV=1 - [B0BMV4_RAT]	5.83567	5.12	1	1	1	2	301947	293	32.0286	9.08545
G3V918	Phosphoribosylglycinamide formyltransferase, isoform CRA_a OS=Rattus norvegicus GN=Gart PE=3 SV=1 - [G3V918_RAT]	5.83024	3.56	3	3	3	3	1.38235e+06	1010	107.512	6.60986
B1H263	RGD1307041 protein (Fragment) OS=Rattus norvegicus GN=RGD1307041 PE=2 SV=1 - [B1H263_RAT]	5.82544	3.02	2	1	1	2	676887	398	45.9448	8.52881
Q5U2N0	CTP synthase 2 OS=Rattus norvegicus GN=Ctps2 PE=2 SV=1 - [PYRG2_RAT]	5.82135	4.78	1	3	3	4	938383	586	65.6317	6.39209
D3ZE63	Protein LOC679748 OS=Rattus norvegicus GN=LOC679748 PE=4 SV=1 - [D3ZE63_RAT]	5.79458	13.91	4	2	2	5	1.6478e+07	115	12.5973	7.89893
Q156J1	Bcl-2-interacting death suppressor OS=Rattus norvegicus GN=Bag3 PE=2 SV=1 - [Q156J1_RAT]	5.78936	6.62	2	3	3	3	875345	574	61.4871	7.00537
F1M6F6	Protein Asap2 (Fragment) OS=Rattus norvegicus GN=Asap2 PE=4 SV=2 - [F1M6F6_RAT]	5.78484	0.87	3	1	1	3	5.9057e+07	922	102.694	6.68311
P49432	Pyruvate dehydrogenase E1 component subunit beta, mitochondrial OS=Rattus norvegicus GN=Pdhb PE=1 SV=2 - [ODPB_RAT]	5.7745	8.36	1	3	3	3	647052	359	38.957	6.65381
Q5PPN2	Ribonuclease P protein subunit p25 OS=Rattus norvegicus GN=Rpp25 PE=2 SV=1 - [RPP25_RAT]	5.77042	12.56	1	2	2	4	235220	199	20.9258	9.40771
F1LP60	Moesin (Fragment) OS=Rattus norvegicus GN=Msn PE=2 SV=1 - [F1LP60_RAT]	5.76277	3.13	5	2	2	3	590086	576	67.6098	6.46826
P36970-2	Isoform Cytoplasmic of Phospholipid hydroperoxide glutathione peroxidase, mitochondrial OS=Rattus norvegicus GN=Gpx4 - [GPX41_RAT]	5.7497	9.41	5	2	2	3	1.70787e+06	170	19.4783	8.00146
Q8VIL3	ZW10 interactor OS=Rattus norvegicus GN=Zwint PE=1 SV=1 - [ZWINT_RAT]	5.74241	9.77	2	2	2	2	831983	266	30.1237	6.1001
D4A1B8	Protein Dctn3 OS=Rattus norvegicus GN=Dctn3 PE=4 SV=1 - [D4A1B8_RAT]	5.70089	15.05	1	3	3	4	1.12691e+06	186	21.0993	5.70654
P18422	Proteasome subunit alpha type-3 OS=Rattus norvegicus GN=Psma3 PE=1 SV=3 - [PSA3_RAT]	5.66631	10.98	3	3	3	3	7.99409e+06	255	28.4011	5.43994
Q7TP78	Aa2-258 OS=Rattus norvegicus GN=Ndufa8 PE=2 SV=1 - [Q7TP78_RAT]	5.65928	5.82	1	1	1	2	853699	189	21.952	8.104
B2RYV1	Stim1 protein (Fragment) OS=Rattus norvegicus GN=Stim1 PE=2 SV=1 - [B2RYV1_RAT]	5.63063	6.14	2	2	2	3	218557	391	45.7284	6.78564
M0R4Y5	Uncharacterized protein (Fragment) OS=Rattus norvegicus PE=4 SV=1 - [M0R4Y5_RAT]	5.61694	2.96	5	1	1	4	388881	304	31.6856	5.03369
D3ZRM9	60S ribosomal protein L13 OS=Rattus norvegicus GN=LOC100360491 PE=3 SV=1 - [D3ZRM9_RAT]	5.60938	18.48	4	4	4	5	2.9266e+06	211	24.1874	11.4146
Q5FVQ4	Malectin OS=Rattus norvegicus GN=Mlec PE=2 SV=1 - [MLEC_RAT]	5.5981	4.47	1	1	1	2	814419	291	32.3978	5.5542
B4F7A2	Armc8 protein (Fragment) OS=Rattus norvegicus GN=Armc8 PE=2 SV=1 - [B4F7A2_RAT]	5.59411	2.83	2	2	2	3	631207	672	75.2531	6.72705
Q9QZK5	Serine protease HTRA1 OS=Rattus norvegicus GN=Htra1 PE=2 SV=1 - [HTRA1_RAT]	5.59403	6.46	1	3	3	3	1.21093e+06	480	51.2977	7.6499
Q8VHU6	Protein kinase A anchoring protein Rt31 (Fragment) OS=Rattus norvegicus GN=Akap13 PE=2 SV=1 - [Q8VHU6_RAT]	5.58931	1.2	2	1	1	3	6.24569e+06	582	62.9052	5.2749
D4A463	Protein Tpgs1 OS=Rattus norvegicus GN=Tpgs1 PE=4 SV=1 - [D4A463_RAT]	5.57937	4.62	1	1	1	2	618942	303	32.5001	8.93896
Q6P6R7	Small G protein signaling modulator 3 OS=Rattus norvegicus GN=Sgsm3 PE=1 SV=1 - [SGSM3_RAT]	5.5767	4.27	2	4	4	6	737875	749	85.1344	5.80811
Q4QR73	DnaJ (Hsp40) homolog, subfamily A, member 4 OS=Rattus norvegicus GN=Dnaja4 PE=2 SV=1 - [Q4QR73_RAT]	5.57078	5.77	1	2	3	3	3.77353e+06	555	61.8373	8.45557
Q91XU8	Phosphatidate cytidylyltransferase 2 OS=Rattus norvegicus GN=Cds2 PE=2 SV=1 - [CDS2_RAT]	5.55434	6.09	2	2	2	5	313311	443	51.2888	7.04932
B5DFN3	Mitochondrial nucleoid factor 1 OS=Rattus norvegicus GN=Mnf1 PE=2 SV=1 - [MNF1_RAT]	5.54773	9.56	2	1	1	2	953441	136	16.3203	9.23193
A1L1L6	Mitochondrial Rho GTPase OS=Rattus norvegicus GN=Rnf135 PE=2 SV=1 - [A1L1L6_RAT]	5.54611	2.85	2	2	2	3	930767	631	72.1106	6.40479
M0R8G1	Protein Ssbp2 (Fragment) OS=Rattus norvegicus GN=Ssbp2 PE=4 SV=1 - [M0R8G1_RAT]	5.54141	3.22	6	1	1	2	2.55248e+06	311	32.9253	6.63916
D3ZCU8	Protein Rab33a OS=Rattus norvegicus GN=Rab33a PE=3 SV=1 - [D3ZCU8_RAT]	5.5208	10.55	1	2	2	3	667655	237	26.5664	7.63525
B4F778	Protein Rfc4 OS=Rattus norvegicus GN=Rfc4 PE=2 SV=1 - [B4F778_RAT]	5.50222	12.91	2	5	5	6	1.01707e+06	364	39.9319	6.58057
B2RYW7	Protein Srp14 OS=Rattus norvegicus GN=Srp14 PE=4 SV=1 - [B2RYW7_RAT]	5.49315	10.91	1	1	1	2	1.1747e+06	110	12.5018	10.1694
D3ZYH3	Protein LOC100912928 OS=Rattus norvegicus GN=Nudt11 PE=3 SV=1 - [D3ZYH3_RAT]	5.44112	20.73	3	3	3	3	2.80673e+06	164	18.5813	5.69385
F1LUE2	Calcium/calmodulin-dependent protein kinase type II subunit gamma (Fragment) OS=Rattus norvegicus GN=Camk2g PE=2 SV=1 - [F1LUE2_RAT]	5.43582	4.43	7	1	2	4	2.73474e+06	474	53.5594	7.57666
B0BN70	Small integral membrane protein 7 OS=Rattus norvegicus GN=Smim7 PE=3 SV=1 - [SMIM7_RAT]	5.43058	13.33	1	1	1	2	341782	75	8.57748	8.17725
G9BD46	Elongation of long chain fatty acids family member 5 OS=Rattus norvegicus GN=Elovl5 PE=2 SV=1 - [G9BD46_RAT]	5.41626	3.01	2	1	1	3	1.40305e+06	299	35.0337	9.5542
Q5BK32	FAS-associated factor 2 OS=Rattus norvegicus GN=Faf2 PE=2 SV=1 - [FAF2_RAT]	5.40671	6.07	1	2	2	3	1.0655e+06	346	41.0538	5.96045
D4A510	Protein Smarcc2 OS=Rattus norvegicus GN=Smarcc2 PE=2 SV=2 - [D4A510_RAT]	5.38088	1.5	2	2	2	4	545918	1130	124.202	5.43994
D3ZCP9	Protein Gtf2e2 OS=Rattus norvegicus GN=Gtf2e2 PE=2 SV=1 - [D3ZCP9_RAT]	5.37944	4.12	1	1	1	2	159251	291	32.9394	9.64209
O88377	Phosphatidylinositol 5-phosphate 4-kinase type-2 beta OS=Rattus norvegicus GN=Pip4k2b PE=1 SV=1 - [PI42B_RAT]	5.37212	8.89	1	1	3	3	732341	416	47.2338	7.51807
D3ZN95	Protein Hcfc1 OS=Rattus norvegicus GN=Hcfc1 PE=2 SV=1 - [D3ZN95_RAT]	5.37184	0.93	1	2	2	3	545295	2034	209.022	7.00537
Q9JHW0	Proteasome subunit beta type-7 OS=Rattus norvegicus GN=Psmb7 PE=1 SV=1 - [PSB7_RAT]	5.3705	7.22	1	2	2	3	2.01286e+06	277	29.9083	7.97217
Q4V8C2	Centromere/kinetochore protein zw10 homolog OS=Rattus norvegicus GN=Zw10 PE=2 SV=3 - [ZW10_RAT]	5.36958	2.96	1	2	2	2	488076	777	87.9103	5.99854
Q5I0K4	Mrps9 protein (Fragment) OS=Rattus norvegicus GN=Mrps9 PE=2 SV=1 - [Q5I0K4_RAT]	5.35528	2.96	2	1	1	2	457968	338	39.3671	8.646
F1LNC4	Protein LOC100359512 OS=Rattus norvegicus GN=RGD1560475 PE=2 SV=2 - [F1LNC4_RAT]	5.34741	9.95	2	2	2	3	611206	201	23.082	8.36768
Q2TA68	Dynamin-like 120 kDa protein, mitochondrial OS=Rattus norvegicus GN=Opa1 PE=1 SV=1 - [OPA1_RAT]	5.34346	4.38	4	4	4	4	654527	960	111.238	7.53271
B0BNA3	Arginyl-tRNA synthetase 2, mitochondrial OS=Rattus norvegicus GN=Rars2 PE=2 SV=1 - [B0BNA3_RAT]	5.34156	1.9	1	1	1	2	82685.8	578	65.2628	8.41162
B0BNE3	Protein Trappc5 OS=Rattus norvegicus GN=Trappc5 PE=2 SV=1 - [B0BNE3_RAT]	5.31859	13.3	1	2	2	2	586649	188	20.7822	9.65674
D3ZHB7	Protein Ube3c OS=Rattus norvegicus GN=Ube3c PE=4 SV=2 - [D3ZHB7_RAT]	5.3155	0.92	1	1	1	2	839703	1085	124.27	6.63916
A9UMV9	Ndufa7 protein OS=Rattus norvegicus GN=Ndufa7 PE=4 SV=1 - [A9UMV9_RAT]	5.27109	8.04	1	1	1	2	888883	112	12.4926	10.4771
P61805	Dolichyl-diphosphooligosaccharide--protein glycosyltransferase subunit DAD1 OS=Rattus norvegicus GN=Dad1 PE=3 SV=3 - [DAD1_RAT]	5.24368	19.47	1	2	2	2	1.35129e+06	113	12.4886	7.07861
M0R3Q2	Uncharacterized protein (Fragment) OS=Rattus norvegicus PE=4 SV=1 - [M0R3Q2_RAT]	5.24219	3.54	1	1	1	3	1.30786e+06	198	21.4535	7.76709
Q5I0D7	Xaa-Pro dipeptidase OS=Rattus norvegicus GN=Pepd PE=2 SV=1 - [PEPD_RAT]	5.23896	2.24	1	1	1	2	114416	492	54.7149	5.94775
B2RZC6	Ilf2 protein OS=Rattus norvegicus GN=Ilf2 PE=2 SV=1 - [B2RZC6_RAT]	5.22035	3.59	1	1	1	2	258999	390	43.0352	5.26221
Q0ZHH6-2	Isoform 2 of Atlastin-3 OS=Rattus norvegicus GN=Atl3 - [ATLA3_RAT]	5.21509	5.6	3	3	3	4	942783	536	60.2592	5.63037
Q6TEK4	Vitamin K epoxide reductase complex subunit 1 OS=Rattus norvegicus GN=Vkorc1 PE=1 SV=1 - [VKOR1_RAT]	5.18837	8.07	1	1	1	2	1.33138e+06	161	17.7714	9.33447
M0RCS9	Uncharacterized protein (Fragment) OS=Rattus norvegicus PE=4 SV=1 - [M0RCS9_RAT]	5.17149	10.42	17	1	1	2	1.92316e+06	144	16.6121	11.1362
Q52KJ9	Protein Tmx1 OS=Rattus norvegicus GN=Tmx1 PE=2 SV=1 - [Q52KJ9_RAT]	5.1545	7.55	1	2	2	2	1.69876e+06	278	31.4147	5.30029
C8YL70	DNA-directed polymerase delta interacting protein 2 OS=Rattus norvegicus GN=Poldip2 PE=2 SV=1 - [C8YL70_RAT]	5.12765	9.24	1	3	3	3	342929	368	41.7711	8.63135
Q9JJI7	Membrane bound arginine specific serine protease OS=Rattus norvegicus GN=St14 PE=2 SV=1 - [Q9JJI7_RAT]	5.10568	1.52	1	1	1	2	2.19887e+06	855	94.8947	6.63916
F1M024	Uncharacterized protein (Fragment) OS=Rattus norvegicus PE=2 SV=2 - [F1M024_RAT]	5.07266	5.26	3	2	2	2	828072	646	72.1192	7.76709
Q4QQW4	Histone deacetylase 1 OS=Rattus norvegicus GN=Hdac1 PE=2 SV=1 - [HDAC1_RAT]	5.05681	4.36	4	2	2	2	816152	482	55.0577	5.47803
Q6AZ26	C-terminal binding protein 1 OS=Rattus norvegicus GN=Ctbp1 PE=2 SV=1 - [Q6AZ26_RAT]	5.05438	7.67	2	2	2	3	1.36042e+06	391	42.6028	6.58057
D4A434	Protein Rnaseh2c OS=Rattus norvegicus GN=Rnaseh2c PE=4 SV=1 - [D4A434_RAT]	5.05181	6.02	1	1	1	2	416264	166	17.8631	5.56689
Q5EB77	Ras-related protein Rab-18 OS=Rattus norvegicus GN=Rab18 PE=2 SV=1 - [RAB18_RAT]	5.03878	11.65	1	2	2	2	1.69016e+06	206	22.9616	5.23682
P36372	Antigen peptide transporter 2 OS=Rattus norvegicus GN=Tap2 PE=2 SV=1 - [TAP2_RAT]	5.00301	3.84	8	3	3	4	955666	703	77.664	6.72705
Q99P39-2	Isoform Cytoplasmic of Cysteine desulfurase, mitochondrial OS=Rattus norvegicus GN=Nfs1 - [NFS1_RAT]	4.99338	6.3	4	2	2	2	566321	397	44.0416	7.75244
D3ZL50	Protein Ttc37 OS=Rattus norvegicus GN=Ttc37 PE=4 SV=2 - [D3ZL50_RAT]	4.99317	0.78	1	1	1	2	305921	1403	156.06	6.65381
Q9Z336	Dynein light chain Tctex-type 1 OS=Rattus norvegicus GN=Dynlt1 PE=1 SV=1 - [DYLT1_RAT]	4.9815	14.16	1	1	1	3	1.21903e+06	113	12.444	5.08447
F1LS29	Calpain-1 catalytic subunit OS=Rattus norvegicus GN=Capn1 PE=2 SV=1 - [F1LS29_RAT]	4.95854	1.54	2	1	1	2	440115	713	82.0482	5.64307
P13668	Stathmin OS=Rattus norvegicus GN=Stmn1 PE=1 SV=2 - [STMN1_RAT]	4.95369	6.71	2	1	1	2	435565	149	17.2779	5.97314
Q5NDF0	Glycosyltransferase-like domain-containing protein 2 OS=Rattus norvegicus GN=Gtdc2 PE=2 SV=1 - [GTDC2_RAT]	4.95369	2.07	1	1	1	2	185762	580	66.6745	8.48486
D3ZK73	Cullin 4B (Predicted) OS=Rattus norvegicus GN=Cul4b PE=3 SV=1 - [D3ZK73_RAT]	4.94168	1.24	1	1	1	2	206151	971	110.742	8.44092
Q62639	GTP-binding protein Rheb OS=Rattus norvegicus GN=Rheb PE=1 SV=1 - [RHEB_RAT]	4.92792	12.5	5	2	2	2	2.89805e+06	184	20.4666	5.92236
Q9QZR6-2	Isoform 2 of Septin-9 OS=Rattus norvegicus GN=Sept9 - [SEPT9_RAT]	4.92693	6.68	6	3	3	3	390498	479	54.355	7.75244
Q3KRF0	Vacuolar protein sorting 33 homolog A (S. cerevisiae) OS=Rattus norvegicus GN=Vps33a PE=2 SV=1 - [Q3KRF0_RAT]	4.91783	3.69	3	2	2	2	236706	597	67.4531	7.04932
D4A994	Protein Emc1 OS=Rattus norvegicus GN=Emc1 PE=4 SV=1 - [D4A994_RAT]	4.91008	2.22	1	2	2	2	856043	993	111.115	7.31299
Q5M949	Nipsnap homolog 3A (C. elegans) OS=Rattus norvegicus GN=Nipsnap3b PE=2 SV=1 - [Q5M949_RAT]	4.8883	8.1	1	2	2	2	3.50742e+06	247	28.3224	9.23193
B5DFB2	Protein Rbbp4 OS=Rattus norvegicus GN=Rbbp4 PE=2 SV=1 - [B5DFB2_RAT]	4.83536	4.24	2	2	2	3	976712	425	47.6261	4.89404
Q03346	Mitochondrial-processing peptidase subunit beta OS=Rattus norvegicus GN=Pmpcb PE=1 SV=3 - [MPPB_RAT]	4.82558	5.93	1	2	3	3	3.02571e+06	489	54.2304	6.69775
Q5U2Z3	Nucleosome assembly protein 1-like 4 OS=Rattus norvegicus GN=Nap1l4 PE=2 SV=1 - [NP1L4_RAT]	4.82339	2.85	1	1	1	2	686910	386	43.8895	4.67822
Q3MHS7	GDP-mannose 4, 6-dehydratase OS=Rattus norvegicus GN=Gmds PE=2 SV=1 - [Q3MHS7_RAT]	4.81791	5.38	1	2	2	2	1.14012e+06	372	42.0683	7.28369
D3ZBS9	Protein Smarcd1 OS=Rattus norvegicus GN=Smarcd1 PE=4 SV=1 - [D3ZBS9_RAT]	4.80087	2.52	1	1	1	2	305168	515	58.2239	9.24658
D3ZFQ8	Cytochrome c-1 (Predicted), isoform CRA_b OS=Rattus norvegicus GN=Cyc1 PE=4 SV=2 - [D3ZFQ8_RAT]	4.79717	5.53	1	1	1	3	1.49565e+06	217	23.006	10.272
G3V7Q6	Proteasome subunit beta type OS=Rattus norvegicus GN=Psmb5 PE=3 SV=1 - [G3V7Q6_RAT]	4.78303	9.89	2	2	2	2	1.30666e+06	263	28.5412	7.02002
M0R725	Uncharacterized protein (Fragment) OS=Rattus norvegicus PE=4 SV=1 - [M0R725_RAT]	4.77621	7.95	4	2	2	2	1.13979e+06	264	28.7433	6.3667
Q4FZY0	EF-hand domain-containing protein D2 OS=Rattus norvegicus GN=Efhd2 PE=1 SV=1 - [EFHD2_RAT]	4.74483	9.62	2	2	2	2	587263	239	26.7425	5.07178
D3ZCZ9	Protein LOC100912599 OS=Rattus norvegicus GN=LOC679739 PE=4 SV=1 - [D3ZCZ9_RAT]	4.73938	23.28	3	2	2	4	907205	116	13.0317	9.21729
Q5XIF3	NADH dehydrogenase [ubiquinone] iron-sulfur protein 4, mitochondrial OS=Rattus norvegicus GN=Ndufs4 PE=1 SV=1 - [NDUS4_RAT]	4.72955	13.71	1	2	2	4	2.7988e+06	175	19.7282	10.1401
Q5HZA9	Transmembrane protein 126A OS=Rattus norvegicus GN=Tmem126a PE=2 SV=1 - [T126A_RAT]	4.72146	8.67	1	2	2	2		196	21.6436	9.53955
Q5BJU0	Protein Rras2 OS=Rattus norvegicus GN=Rras2 PE=2 SV=1 - [Q5BJU0_RAT]	4.69183	11.27	2	2	2	2	1.27896e+06	204	23.3847	6.01123
D4A6D7-2	Isoform 2 of Tetratricopeptide repeat protein 19, mitochondrial OS=Rattus norvegicus GN=Ttc19 - [TTC19_RAT]	4.6791	5.11	2	2	2	2	1.02019e+06	352	39.8495	6.21436
Q5XIA1	Nicalin OS=Rattus norvegicus GN=Ncln PE=2 SV=1 - [NCLN_RAT]	4.67859	3.55	1	2	2	2	1.61904e+06	563	62.9525	6.58057
Q68FW9	COP9 signalosome complex subunit 3 OS=Rattus norvegicus GN=Cops3 PE=2 SV=1 - [CSN3_RAT]	4.6624	2.6	1	1	1	2	3.95418e+06	423	47.828	6.65381
D3ZRA3	Acetyl-CoA carboxylase 1 OS=Rattus norvegicus GN=Acaca PE=2 SV=2 - [D3ZRA3_RAT]	4.64817	0.99	3	2	2	2	737601	2030	230.425	6.46826
D4A2G9	Protein Ranbp1 OS=Rattus norvegicus GN=RGD1565297 PE=4 SV=1 - [D4A2G9_RAT]	4.64343	9.85	1	2	2	2	2.0667e+06	203	23.5817	5.22412
Q63555	SP120 OS=Rattus norvegicus GN=Hnrnpu PE=2 SV=1 - [Q63555_RAT]	4.63974	3.13	2	2	2	2	679821	798	87.6936	6.23975
Q4FZS3	Prpf8 protein (Fragment) OS=Rattus norvegicus GN=Prpf8 PE=2 SV=1 - [Q4FZS3_RAT]	4.63723	2.68	2	1	1	2	91673.4	410	46.9607	6.84424
Q6IN42	Grn protein OS=Rattus norvegicus GN=Grn PE=2 SV=1 - [Q6IN42_RAT]	4.62022	6.65	4	2	3	3	975333	511	54.9913	6.34131
Q5U2U7	mRNA cap guanine-N7 methyltransferase OS=Rattus norvegicus GN=Rnmt PE=2 SV=1 - [MCES_RAT]	4.60852	6.29	1	3	3	3	1.05234e+06	461	52.7833	6.39209
Q5EB72	Histidyl-tRNA synthetase 2-like OS=Rattus norvegicus GN=Hars2 PE=2 SV=1 - [Q5EB72_RAT]	4.59599	4.96	2	1	1	2		262	29.2554	5.41455
D4A5H2	Protein RGD1306583 OS=Rattus norvegicus GN=Trappc13 PE=2 SV=2 - [D4A5H2_RAT]	4.58872	1.91	2	1	1	2	605910	418	46.4846	5.73193
A8USN8	Chloride intracellular channel 1 OS=Rattus norvegicus PE=2 SV=1 - [A8USN8_RAT]	4.5871	6.22	2	1	1	2	777468	193	21.4903	7.02002
Q924M6	Apoptosis-inducing factor OS=Rattus norvegicus GN=Aifm1 PE=2 SV=1 - [Q924M6_RAT]	4.58489	3.13	2	2	2	2	1.18876e+06	608	66.0785	8.89502
Q569A6	ER lumen protein retaining receptor 1 OS=Rattus norvegicus GN=Kdelr1 PE=2 SV=1 - [ERD21_RAT]	4.58236	7.55	2	2	2	4	3.20127e+06	212	24.53	8.6167
Q711G3	Isoamyl acetate-hydrolyzing esterase 1 homolog OS=Rattus norvegicus GN=Iah1 PE=2 SV=2 - [IAH1_RAT]	4.58234	6.83	1	2	2	3	1.57411e+06	249	27.9864	5.94775
Q5U2U0	ATP-dependent Clp protease ATP-binding subunit clpX-like, mitochondrial OS=Rattus norvegicus GN=Clpx PE=2 SV=1 - [CLPX_RAT]	4.55331	3.63	1	2	2	2	347239	633	69.1647	7.72314
M0R9N8	Protein Anlnl1 (Fragment) OS=Rattus norvegicus GN=Anlnl1 PE=4 SV=1 - [M0R9N8_RAT]	4.52154	1.34	3	1	1	2	403825	972	106.789	6.52197
P34067	Proteasome subunit beta type-4 OS=Rattus norvegicus GN=Psmb4 PE=1 SV=2 - [PSB4_RAT]	4.51103	9.51	2	2	2	2	2.05102e+06	263	29.1784	6.91748
D3ZQD3	Oxoglutarate dehydrogenase-like (Predicted), isoform CRA_a OS=Rattus norvegicus GN=Ogdhl PE=4 SV=1 - [D3ZQD3_RAT]	4.51022	1.94	1	2	2	3	775104	1029	116.638	6.87354
E9PSS8	Protein RT1-A1 OS=Rattus norvegicus GN=RT1-A1 PE=2 SV=2 - [E9PSS8_RAT]	4.49891	12.66	131	3	3	5	1.28399e+06	308	35.2644	5.23682
M0R850	Uncharacterized protein OS=Rattus norvegicus PE=4 SV=1 - [M0R850_RAT]	4.49581	6.57	6	1	2	4	1.16844e+07	213	23.7509	10.3452
D3ZIF5	Adaptor-related protein complex 3, beta 1 subunit (Predicted), isoform CRA_b OS=Rattus norvegicus GN=Ap3b1 PE=4 SV=1 - [D3ZIF5_RAT]	4.46719	2.52	1	1	2	2	503901	794	87.7108	5.77002
B2RZD1	Protein Sec61b OS=Rattus norvegicus GN=Sec61b PE=4 SV=1 - [B2RZD1_RAT]	4.46273	10.42	1	1	1	2	4.16266e+06	96	9.98211	11.561
D3ZET5	Uncharacterized protein OS=Rattus norvegicus PE=4 SV=2 - [D3ZET5_RAT]	4.4381	5.36	2	1	1	2	339062	261	30.3707	9.81787
B3DMA5	CCR4-NOT transcription complex, subunit 7 OS=Rattus norvegicus GN=Cnot7 PE=2 SV=1 - [B3DMA5_RAT]	4.43382	7.37	1	2	2	2	803241	285	32.6969	4.84326
Q68FQ9	LanC lantibiotic synthetase component C-like 2 (Bacterial) OS=Rattus norvegicus GN=Lancl2 PE=2 SV=1 - [Q68FQ9_RAT]	4.43213	3.11	1	1	1	2	386177	450	50.9356	7.45947
P13086	Succinyl-CoA ligase [ADP/GDP-forming] subunit alpha, mitochondrial OS=Rattus norvegicus GN=Suclg1 PE=2 SV=2 - [SUCA_RAT]	4.42599	9.25	2	2	2	3	669874	346	36.125	9.48096
D3ZM21	Catechol-O-methyltransferase domain containing 1 (Predicted), isoform CRA_a OS=Rattus norvegicus GN=Comtd1 PE=4 SV=1 - [D3ZM21_RAT]	4.42536	3.44	1	1	1	2	504695	262	28.9686	8.76318
Q505J8	Phenylalanine--tRNA ligase alpha subunit OS=Rattus norvegicus GN=Farsa PE=1 SV=1 - [SYFA_RAT]	4.41109	5.71	1	3	3	3	672646	508	57.6837	8.27979
Q793F9	Vacuolar protein sorting-associated protein 4A OS=Rattus norvegicus GN=Vps4a PE=2 SV=1 - [VPS4A_RAT]	4.40123	2.75	4	1	1	2	2.09061e+06	437	48.8761	7.79639
F1LPG5	Protein LOC688963 OS=Rattus norvegicus GN=LOC688963 PE=2 SV=1 - [F1LPG5_RAT]	4.39623	17.83	6	2	2	2	787508	129	15.055	9.81787
Q04631	Protein farnesyltransferase/geranylgeranyltransferase type-1 subunit alpha OS=Rattus norvegicus GN=Fnta PE=1 SV=1 - [FNTA_RAT]	4.37432	4.77	2	2	2	2	1.93626e+06	377	44.022	4.93213
Q4QQS7	Protein Umps OS=Rattus norvegicus GN=Umps PE=2 SV=1 - [Q4QQS7_RAT]	4.3488	3.95	1	2	2	2	1.29505e+06	481	52.3454	6.48096
D3ZZC1	Protein Txndc5 OS=Rattus norvegicus GN=Txndc5 PE=3 SV=1 - [D3ZZC1_RAT]	4.3342	3.84	1	1	1	1	273541	417	46.324	5.88428
Q5XIH7	Prohibitin-2 OS=Rattus norvegicus GN=Phb2 PE=1 SV=1 - [PHB2_RAT]	4.31772	9.03	1	3	3	3	1.24762e+06	299	33.2919	9.83252
Q6GQP4	Ras-related protein Rab-31 OS=Rattus norvegicus GN=Rab31 PE=1 SV=2 - [RAB31_RAT]	4.31523	5.15	1	1	1	2	661919	194	21.3548	7.12256
G3V6S0	Protein Sptbn1 OS=Rattus norvegicus GN=Sptbn1 PE=4 SV=2 - [G3V6S0_RAT]	4.31223	0.81	2	2	2	2	932497	2357	273.317	5.71924
Q3SWS8	mRNA export factor OS=Rattus norvegicus GN=Rae1 PE=2 SV=1 - [RAE1L_RAT]	4.30525	5.98	1	2	2	2	1.28423e+06	368	40.8929	7.85498
Q01062	cGMP-dependent 3',5'-cyclic phosphodiesterase OS=Rattus norvegicus GN=Pde2a PE=1 SV=2 - [PDE2A_RAT]	4.26966	1.19	2	1	1	2	389798	928	104.597	5.51611
Q641Y8	ATP-dependent RNA helicase DDX1 OS=Rattus norvegicus GN=Ddx1 PE=2 SV=1 - [DDX1_RAT]	4.23293	2.3	2	2	2	2	733993	740	82.4448	7.2251
A0JPJ3	Arsb protein (Fragment) OS=Rattus norvegicus GN=Arsb PE=2 SV=1 - [A0JPJ3_RAT]	4.22231	2.1	2	1	1	2	1.75097e+06	523	57.749	8.57275
O88823	Protein JTB OS=Rattus norvegicus GN=Jtb PE=2 SV=1 - [JTB_RAT]	4.21151	8.9	1	1	1	2	241766	146	16.3744	8.19189
F1LPQ3	Alpha-mannosidase 2C1 OS=Rattus norvegicus GN=Man2c1 PE=2 SV=1 - [F1LPQ3_RAT]	4.20861	2.21	3	2	2	3	777277	1039	115.827	6.45557
D4A7Z5	Protein LOC100360940 OS=Rattus norvegicus GN=LOC100360940 PE=4 SV=1 - [D4A7Z5_RAT]	4.19121	7.63	2	2	2	2	2.4507e+06	236	26.7905	5.49072
Q05175	Brain acid soluble protein 1 OS=Rattus norvegicus GN=Basp1 PE=1 SV=2 - [BASP1_RAT]	4.18676	6.36	1	1	1	4	84030.4	220	21.7774	4.51318
Q4QQS6	Asparagine-linked glycosylation 5 homolog (Yeast, dolichyl-phosphate beta-glucosyltransferase), isoform CRA_a OS=Rattus norvegicus GN=Alg5 PE=2 SV=1 - [Q4QQS6_RAT]	4.18573	4.01	1	1	1	2	576557	324	36.8333	8.646
F1M8L1	Kinesin-like protein KIF2A OS=Rattus norvegicus GN=Kif2a PE=2 SV=2 - [F1M8L1_RAT]	4.18484	1.56	4	1	1	2	123777	704	79.6396	6.68311
Q6PCT7	RCG51933, isoform CRA_b OS=Rattus norvegicus GN=Tdrkh PE=2 SV=1 - [Q6PCT7_RAT]	4.17705	7.09	2	2	2	2	605893	296	32.3999	7.85498
D4A8A0	Protein Cad OS=Rattus norvegicus GN=Cad PE=3 SV=2 - [D4A8A0_RAT]	4.16733	0.81	1	2	2	2	405373	2224	243.217	6.53662
P02091	Hemoglobin subunit beta-1 OS=Rattus norvegicus GN=Hbb PE=1 SV=3 - [HBB1_RAT]	4.15208	14.97	6	2	2	2	669610	147	15.9692	8.07471
Q4V7A0	WD repeat-containing protein 61 OS=Rattus norvegicus GN=Wdr61 PE=1 SV=1 - [WDR61_RAT]	4.13793	5.9	1	3	3	5	1.23359e+06	305	33.7258	5.46533
Q01750	General transcription factor IIF subunit 2 OS=Rattus norvegicus GN=Gtf2f2 PE=2 SV=1 - [T2FB_RAT]	4.13477	7.63	2	2	2	2	973441	249	28.3318	9.21729
Q9WU49	Calcium-regulated heat stable protein 1 OS=Rattus norvegicus GN=Carhsp1 PE=1 SV=1 - [CHSP1_RAT]	4.13365	10.88	1	1	1	2	352500	147	15.896	8.20654
P16617	Phosphoglycerate kinase 1 OS=Rattus norvegicus GN=Pgk1 PE=1 SV=2 - [PGK1_RAT]	4.11362	4.08	1	1	1	1	190058	417	44.51	7.89893
Q68FS1	Cytosolic Fe-S cluster assembly factor NUBP2 OS=Rattus norvegicus GN=Nubp2 PE=1 SV=1 - [NUBP2_RAT]	4.09973	7.75	1	2	2	2	856192	271	28.9078	6.21436
Q63570	26S protease regulatory subunit 6B OS=Rattus norvegicus GN=Psmc4 PE=1 SV=1 - [PRS6B_RAT]	4.09338	6.94	1	3	3	3	2.67774e+06	418	47.3786	5.21143
O35077	Glycerol-3-phosphate dehydrogenase [NAD(+)], cytoplasmic OS=Rattus norvegicus GN=Gpd1 PE=1 SV=4 - [GPDA_RAT]	4.05258	7.45	2	3	3	4	2.00886e+06	349	37.4282	6.59521
D4ADB4	CGG triplet repeat binding protein 1 (Predicted) OS=Rattus norvegicus GN=Cggbp1 PE=4 SV=1 - [D4ADB4_RAT]	4.04132	5.39	1	1	1	2		167	18.8086	8.95361
P42667	Signal peptidase complex catalytic subunit SEC11A OS=Rattus norvegicus GN=Sec11a PE=2 SV=1 - [SC11A_RAT]	4.03682	9.5	2	2	2	2	1.9608e+06	179	20.586	9.17334
F1SW39	PC4 and SFRS1 interacting protein 1 OS=Rattus norvegicus GN=SBP75 PE=2 SV=1 - [F1SW39_RAT]	4.03153	3.98	4	1	2	2	319269	528	59.5795	9.12939
Q499S6	Cathepsin F OS=Rattus norvegicus GN=Ctsf PE=2 SV=1 - [Q499S6_RAT]	4.02144	4.98	1	2	2	2	608256	462	51.7958	6.21436
Q19LA7	Vesicle-associated membrane protein 2 (Fragment) OS=Rattus norvegicus GN=Vamp2 PE=2 SV=1 - [Q19LA7_RAT]	4.01897	48.57	4	1	1	1	1.40504e+06	35	4.03711	9.31982
Q64560	Tripeptidyl-peptidase 2 OS=Rattus norvegicus GN=Tpp2 PE=2 SV=3 - [TPP2_RAT]	4.001	1.84	1	2	2	2	471612	1249	138.206	6.37939
B2RYQ5	Enhancer of rudimentary homolog OS=Rattus norvegicus GN=Erh PE=3 SV=1 - [B2RYQ5_RAT]	3.99964	10.58	2	1	1	2	297648	104	12.251	5.92236
D4A3E8	Mitochondrial ribosomal protein S27 (Predicted), isoform CRA_b OS=Rattus norvegicus GN=Mrps27 PE=4 SV=1 - [D4A3E8_RAT]	3.98908	4.82	1	2	2	2	700557	415	47.618	5.32568
B1WC73	ADP-ribosylation factor-like 6 (Predicted), isoform CRA_a OS=Rattus norvegicus GN=Arl6 PE=2 SV=1 - [B1WC73_RAT]	3.98801	9.14	2	2	2	3	655489	186	20.9551	8.25049
Q5U2Y1-2	Isoform 2 of General transcription factor II-I OS=Rattus norvegicus GN=Gtf2i - [GTF2I_RAT]	3.9757	1.86	2	1	1	1	603874	913	102.961	8.76318
G3V7W1	Programmed cell death 6 (Predicted), isoform CRA_a OS=Rattus norvegicus GN=Pdcd6 PE=4 SV=1 - [G3V7W1_RAT]	3.96918	10.47	2	2	2	3	1.16387e+06	191	21.8908	5.64307
D3ZIX4	Protein H1fx OS=Rattus norvegicus GN=H1fx PE=3 SV=1 - [D3ZIX4_RAT]	3.96726	5.21	1	1	1	2	1.66469e+06	192	20.4763	11.1362
M0R780	Protein Trappc12 OS=Rattus norvegicus GN=Trappc12 PE=4 SV=1 - [M0R780_RAT]	3.9631	3.79	3	2	2	2	507510	581	63.1613	4.62744
D4ABS2	Dynamin-1-like protein (Fragment) OS=Rattus norvegicus GN=Dnm1l PE=2 SV=2 - [D4ABS2_RAT]	3.96237	2.77	7	2	2	2	930524	685	76.7304	7.88428
O08629	Transcription intermediary factor 1-beta OS=Rattus norvegicus GN=Trim28 PE=1 SV=2 - [TIF1B_RAT]	3.96023	5.87	1	3	3	3	2.26423e+06	835	88.8995	5.77002
G3V6K0	COMM domain containing 5, isoform CRA_a OS=Rattus norvegicus GN=Commd5 PE=4 SV=1 - [G3V6K0_RAT]	3.9557	7.14	2	1	1	1	216991	224	24.5099	7.18115
Q91Y81	Septin-2 OS=Rattus norvegicus GN=Sept2 PE=1 SV=1 - [SEPT2_RAT]	3.95071	4.43	1	1	1	1	1.30718e+06	361	41.5663	6.59521
Q8K3W5	Myotubularin-related protein (Fragment) OS=Rattus norvegicus GN=Mtmr9 PE=2 SV=1 - [Q8K3W5_RAT]	3.93593	1.8	2	1	1	2	2.68858e+06	499	57.6162	6.97607
Q08163	Adenylyl cyclase-associated protein 1 OS=Rattus norvegicus GN=Cap1 PE=1 SV=3 - [CAP1_RAT]	3.92653	4.01	2	2	2	2	1.54987e+06	474	51.5565	7.51807
D4ABK1	Protein Syngr3 OS=Rattus norvegicus GN=Syngr3 PE=4 SV=1 - [D4ABK1_RAT]	3.91512	11.56	1	2	2	3	1.98623e+06	199	21.356	9.0415
F7FHZ5	KDEL (Lys-Asp-Glu-Leu) containing 1, isoform CRA_b OS=Rattus norvegicus GN=Kdelc1 PE=4 SV=1 - [F7FHZ5_RAT]	3.91227	5.67	2	1	1	1	294143	282	32.2685	8.22119
M0RDG7	Protein Crlf3 (Fragment) OS=Rattus norvegicus GN=Crlf3 PE=4 SV=1 - [M0RDG7_RAT]	3.90619	2.25	1	1	1	2	157066	400	44.3583	5.21143
D3ZTV7	Ash2 (Absent, small, or homeotic)-like (Drosophila) (Predicted) OS=Rattus norvegicus GN=Ash2l PE=4 SV=1 - [D3ZTV7_RAT]	3.90265	1.61	1	1	1	2	215422	623	68.1852	5.69385
Q499V0	COMM domain containing 7 OS=Rattus norvegicus GN=Commd7 PE=2 SV=1 - [Q499V0_RAT]	3.8902	10	1	2	2	2	690497	200	22.5807	6.32861
Q63190	Emerin OS=Rattus norvegicus GN=Emd PE=2 SV=1 - [EMD_RAT]	3.87085	8.85	2	2	2	3	2.31675e+06	260	29.6574	5.19873
P11167	Solute carrier family 2, facilitated glucose transporter member 1 OS=Rattus norvegicus GN=Slc2a1 PE=1 SV=1 - [GTR1_RAT]	3.86216	2.85	1	1	2	3	4.48735e+06	492	53.9274	8.71924
Q5XIG8	Serine-threonine kinase receptor-associated protein OS=Rattus norvegicus GN=Strap PE=1 SV=1 - [STRAP_RAT]	3.86135	8.57	2	2	2	2	995440	350	38.432	5.12256
Q7TP32	Ac2-127 OS=Rattus norvegicus GN=Polr1c PE=2 SV=1 - [Q7TP32_RAT]	3.85371	13.08	2	3	3	4	853461	260	29.2772	5.99854
Q3T1L0	Aldehyde dehydrogenase family 16 member A1 OS=Rattus norvegicus GN=Aldh16a1 PE=2 SV=1 - [A16A1_RAT]	3.8505	1.75	1	1	1	1	1.04529e+06	802	85.3607	6.15088
M0RAQ6	Uncharacterized protein OS=Rattus norvegicus PE=4 SV=1 - [M0RAQ6_RAT]	3.84622	2.16	2	2	2	2	749108	880	97.9557	6.87354
Q641Y2	NADH dehydrogenase [ubiquinone] iron-sulfur protein 2, mitochondrial OS=Rattus norvegicus GN=Ndufs2 PE=1 SV=1 - [NDUS2_RAT]	3.83529	3.46	1	2	2	2	2.22555e+06	463	52.5276	6.99072
C9DRP6	6-phosphofructo-2-kinase/fructose-2, 6-bisphosphatase 2 variant 5 OS=Rattus norvegicus GN=pfkfb2 PE=2 SV=1 - [C9DRP6_RAT]	3.83003	5.26	7	2	2	2	272220	418	48.3597	6.87354
Q6P7P5	Basic leucine zipper and W2 domain-containing protein 1 OS=Rattus norvegicus GN=Bzw1 PE=2 SV=1 - [BZW1_RAT]	3.82956	5.49	4	3	3	3	1.03315e+06	419	48.0127	5.92236
Q66HA6	ADP-ribosylation factor-like protein 8B OS=Rattus norvegicus GN=Arl8b PE=2 SV=1 - [ARL8B_RAT]	3.81015	18.28	2	4	4	5	1.39751e+06	186	21.5251	8.42627
D3ZJF8	Protein Fcgbp OS=Rattus norvegicus GN=Fcgbp PE=2 SV=2 - [D3ZJF8_RAT]	3.80767	0.35	1	1	1	3	3.13633e+07	2582	274.806	5.09717
Q5XIU9	Membrane-associated progesterone receptor component 2 OS=Rattus norvegicus GN=Pgrmc2 PE=1 SV=1 - [PGRC2_RAT]	3.7965	8.76	2	2	2	2	1.16076e+06	217	23.3887	5.26221
Q920A6	Retinoid-inducible serine carboxypeptidase OS=Rattus norvegicus GN=Scpep1 PE=2 SV=1 - [RISC_RAT]	3.79317	4.87	1	2	2	2	1.09231e+06	452	51.1418	5.52881
A0JN29	Limb and neural patterns OS=Rattus norvegicus GN=Lnp PE=2 SV=1 - [A0JN29_RAT]	3.79274	2.93	1	1	1	2	225993	376	42.143	9.24658
Q9Z2Z8	7-dehydrocholesterol reductase OS=Rattus norvegicus GN=Dhcr7 PE=2 SV=1 - [DHCR7_RAT]	3.78588	4.67	1	2	2	2	854705	471	54.1194	8.35303
D4AE56	Prostaglandin E synthase 2 (Predicted), isoform CRA_b OS=Rattus norvegicus GN=Ptges2 PE=4 SV=1 - [D4AE56_RAT]	3.78214	5.99	1	2	2	2	405012	384	43.4242	9.24658
P33568	Retinoblastoma-associated protein OS=Rattus norvegicus GN=Rb1 PE=1 SV=3 - [RB_RAT]	3.77896	1.2	1	1	1	2	192018	920	104.958	7.82568
D4A414	COX15 homolog, cytochrome c oxidase assembly protein (Yeast), isoform CRA_a OS=Rattus norvegicus GN=Cox15 PE=3 SV=1 - [D4A414_RAT]	3.77388	1.93	2	1	1	2	1.29296e+06	414	45.8843	9.83252
Q5U2R0	Methionine adenosyltransferase 2 subunit beta OS=Rattus norvegicus GN=Mat2b PE=2 SV=1 - [MAT2B_RAT]	3.76891	2.69	1	1	1	2	1.15019e+06	334	37.351	6.94678
E2RUH2	Protein LOC100360501 OS=Rattus norvegicus GN=LOC100360501 PE=2 SV=1 - [E2RUH2_RAT]	3.76483	6.8	2	3	3	4	1.49318e+06	456	49.8871	4.79248
B0BN51	Small nuclear ribonucleoprotein-associated protein OS=Rattus norvegicus GN=Snrpb PE=2 SV=1 - [B0BN51_RAT]	3.74059	9.52	5	3	3	3	4.86705e+06	231	23.6402	10.9019
P63329-2	Isoform 2 of Serine/threonine-protein phosphatase 2B catalytic subunit alpha isoform OS=Rattus norvegicus GN=Ppp3ca - [PP2BA_RAT]	3.72919	4.31	9	2	2	2	475446	511	57.5778	6.30322
P08081-2	Isoform Non-brain of Clathrin light chain A OS=Rattus norvegicus GN=Clta - [CLCA_RAT]	3.72637	7.34	3	1	2	2	1.67129e+06	218	23.5514	4.50049
F1MAB8	Protein Kif11 OS=Rattus norvegicus GN=Kif11 PE=2 SV=1 - [F1MAB8_RAT]	3.71613	1.99	1	2	2	2	654530	1056	118.221	6.12549
F1LMV6	Protein Dsp OS=Rattus norvegicus GN=Dsp PE=2 SV=1 - [F1LMV6_RAT]	3.70874	0.63	2	2	2	2	496558	2877	332.187	6.82959
B5DEG8	LOC685144 protein OS=Rattus norvegicus GN=Sec24c PE=2 SV=1 - [B5DEG8_RAT]	3.69638	2.1	1	2	2	3	204017	1095	118.448	7.06396
O55166	Vacuolar protein sorting-associated protein 52 homolog OS=Rattus norvegicus GN=Vps52 PE=2 SV=2 - [VPS52_RAT]	3.69365	2.77	1	2	2	2	950214	723	82.0516	5.98584
D3ZXX8	Protein Ndufa4l2 OS=Rattus norvegicus GN=Ndufa4l2 PE=4 SV=2 - [D3ZXX8_RAT]	3.68842	12.05	1	2	2	3	1.71553e+06	83	9.55494	10.0669
F7EPH4	Protein Ppa1 OS=Rattus norvegicus GN=Ppa1 PE=4 SV=1 - [F7EPH4_RAT]	3.68788	3.11	2	1	1	2	2.36263e+06	289	32.7501	5.46533
F1MA31	Protein Kdm1a (Fragment) OS=Rattus norvegicus GN=Kdm1a PE=2 SV=2 - [F1MA31_RAT]	3.68233	2.89	2	2	2	2	741808	760	84.2712	6.15088
O08700	Vacuolar protein sorting-associated protein 45 OS=Rattus norvegicus GN=Vps45 PE=2 SV=1 - [VPS45_RAT]	3.67721	3.51	1	2	2	2	732001	570	64.8528	8.25049
G3V7J0	Aldehyde dehydrogenase family 6, subfamily A1, isoform CRA_b OS=Rattus norvegicus GN=Aldh6a1 PE=3 SV=1 - [G3V7J0_RAT]	3.67418	2.06	2	1	1	2	388739	535	57.7105	8.17725
F1LPY7	Trans-2-enoyl-CoA reductase, mitochondrial OS=Rattus norvegicus GN=Mecr PE=2 SV=1 - [F1LPY7_RAT]	3.66449	5.63	2	2	2	3	2.80483e+06	373	40.3092	8.77783
D3ZIN7	Mitochondrial ribosomal protein S23 (Predicted), isoform CRA_b OS=Rattus norvegicus GN=Mrps23 PE=4 SV=1 - [D3ZIN7_RAT]	3.62753	9.6	1	1	1	1	319836	177	20.3086	9.24658
D4ABI7	Protein LOC100365676 OS=Rattus norvegicus GN=LOC100365676 PE=4 SV=2 - [D4ABI7_RAT]	3.62091	3.87	1	1	1	1	934147	362	43.0764	9.0415
D4AE00	Protein Ap3b2 OS=Rattus norvegicus GN=Ap3b2 PE=4 SV=1 - [D4AE00_RAT]	3.61854	2.59	1	2	3	3	629759	1082	119.068	5.63037
G3V678	Protein LOC100912534 OS=Rattus norvegicus GN=LOC100912534 PE=4 SV=1 - [G3V678_RAT]	3.61042	8.67	1	1	1	1	1.00336e+06	150	17.1324	4.67822
Q5I0E7	Transmembrane emp24 domain-containing protein 9 OS=Rattus norvegicus GN=Tmed9 PE=1 SV=1 - [TMED9_RAT]	3.60409	4.68	1	1	1	1	1.9261e+06	235	27.011	8.26514
P70500	CDP-diacylglycerol--inositol 3-phosphatidyltransferase OS=Rattus norvegicus GN=Cdipt PE=1 SV=1 - [CDIPT_RAT]	3.58648	4.69	1	1	1	2	2.66191e+06	213	23.5972	8.26514
D3ZC84	Ubiquitin carboxyl-terminal hydrolase OS=Rattus norvegicus GN=Usp9x PE=3 SV=1 - [D3ZC84_RAT]	3.57766	0.35	1	1	1	2	436152	2547	289.255	5.78271
D4A8G0	Protein Lsm12 OS=Rattus norvegicus GN=Lsm12 PE=4 SV=1 - [D4A8G0_RAT]	3.54761	6.67	1	1	1	1	1.36213e+06	195	21.6871	7.73779
D3ZES2	Protein Trappc6b OS=Rattus norvegicus GN=Trappc6b PE=4 SV=1 - [D3ZES2_RAT]	3.54734	11.39	1	2	2	2	1.34548e+06	158	17.9653	8.67529
P19944	60S acidic ribosomal protein P1 OS=Rattus norvegicus GN=Rplp1 PE=3 SV=1 - [RLA1_RAT]	3.50796	5.26	1	1	1	2	5.55046e+06	114	11.4907	4.32275
M0R6L7	Uncharacterized protein (Fragment) OS=Rattus norvegicus PE=4 SV=1 - [M0R6L7_RAT]	3.50234	13.61	8	3	3	3	721407	191	21.5898	8.11865
Q9R170	Branched-chain-amino-acid aminotransferase (Fragment) OS=Rattus norvegicus GN=Bcat1 PE=2 SV=1 - [Q9R170_RAT]	3.46137	2.21	3	1	1	2	822839	362	40.7959	7.41553
D4A269	Uncharacterized protein OS=Rattus norvegicus PE=4 SV=1 - [D4A269_RAT]	3.44711	11.11	2	1	1	1	5.54427e+06	126	13.7672	7.59131
D4AAZ6	60S ribosomal protein L37a OS=Rattus norvegicus GN=Rpl37a PE=1 SV=1 - [RL37A_RAT]	3.43964	11.11	3	1	1	2	2.08688e+06	72	8.05724	10.3745
P85968	6-phosphogluconate dehydrogenase, decarboxylating OS=Rattus norvegicus GN=Pgd PE=1 SV=1 - [6PGD_RAT]	3.43008	3.52	3	1	1	1	1.13683e+06	483	53.202	7.02002
Q6LDS4	Superoxide dismutase [Cu-Zn] OS=Rattus norvegicus GN=Sod1 PE=2 SV=1 - [Q6LDS4_RAT]	3.39082	7.24	3	1	1	1	3.57594e+06	152	15.6997	6.354
G3V9E4	Acylamino-acid-releasing enzyme OS=Rattus norvegicus GN=Apeh PE=4 SV=1 - [G3V9E4_RAT]	3.3761	3.55	2	2	2	2	1.1963e+06	732	81.3154	5.73193
P56571	ES1 protein homolog, mitochondrial OS=Rattus norvegicus PE=1 SV=2 - [ES1_RAT]	3.36457	6.39	1	2	2	2	2.24315e+06	266	28.1549	8.92432
Q9JJ22-2	Isoform 2 of Endoplasmic reticulum aminopeptidase 1 OS=Rattus norvegicus GN=Erap1 - [ERAP1_RAT]	3.36446	3.17	3	3	3	4	830622	884	100.665	6.37939
Q5HZE2	Transmembrane protein 120A OS=Rattus norvegicus GN=Tmem120a PE=2 SV=1 - [T120A_RAT]	3.31345	3.21	1	1	1	1	894209	343	40.6309	8.77783
Q6AYS3	Protective protein for beta-galactosidase OS=Rattus norvegicus GN=Ctsa PE=2 SV=1 - [Q6AYS3_RAT]	3.31214	2.19	1	1	1	1	994392	456	51.183	5.23682
F1M5T1	Protein LOC100359668 OS=Rattus norvegicus GN=LOC100359668 PE=4 SV=2 - [F1M5T1_RAT]	3.25798	15.85	9	2	2	2	1.58826e+06	183	20.7057	6.65381
D4A5Q2	Structural maintenance of chromosomes protein OS=Rattus norvegicus GN=Smc2 PE=2 SV=1 - [D4A5Q2_RAT]	3.21275	0.84	1	1	1	2	1.03213e+06	1191	134.197	8.52881
D4A6X4	Acylphosphatase OS=Rattus norvegicus GN=Acyp1 PE=3 SV=1 - [D4A6X4_RAT]	3.20725	13.13	1	1	1	1	1.41252e+06	99	11.3048	9.30518
D3ZYX5	Protein Myo6 OS=Rattus norvegicus GN=Myo6 PE=2 SV=2 - [D3ZYX5_RAT]	3.1794	1.19	2	1	1	1	124104	1258	145.666	8.93896
Q9EPJ3	28S ribosomal protein S26, mitochondrial OS=Rattus norvegicus GN=Mrps26 PE=1 SV=1 - [RT26_RAT]	3.16583	5.5	1	1	1	1	905032	200	23.3356	9.96436
D3ZL18	Uncharacterized protein OS=Rattus norvegicus PE=4 SV=1 - [D3ZL18_RAT]	3.16317	6.82	6	1	1	1	1.70441e+06	176	19.9427	9.92041
Q5RK19	Vacuolar-sorting protein SNF8 OS=Rattus norvegicus GN=Snf8 PE=1 SV=1 - [SNF8_RAT]	3.16198	4.65	1	1	1	1	5.79494e+06	258	28.8661	6.65381
D3ZNQ6	Protein Ube2m OS=Rattus norvegicus GN=Ube2m PE=3 SV=1 - [D3ZNQ6_RAT]	3.16191	5.46	1	1	1	1	907360	183	20.8866	7.69385
D4A7V1	Uncharacterized protein OS=Rattus norvegicus PE=4 SV=2 - [D4A7V1_RAT]	3.14103	5.2	2	2	2	2	335889	404	44.7769	5.68115
M0RC45	Protein LOC683536 OS=Rattus norvegicus GN=LOC683536 PE=4 SV=1 - [M0RC45_RAT]	3.12951	7.28	3	1	1	1	1.80013e+06	151	16.9398	6.771
D3ZHA0	Protein Flnc OS=Rattus norvegicus GN=Flnc PE=2 SV=1 - [D3ZHA0_RAT]	3.12174	0.95	2	1	3	3	784482	2726	290.804	5.89697
Q920J4	Thioredoxin-like protein 1 OS=Rattus norvegicus GN=Txnl1 PE=1 SV=3 - [TXNL1_RAT]	3.11498	5.19	1	1	1	1	353823	289	32.2288	4.95752
P0CG51	Polyubiquitin-B OS=Rattus norvegicus GN=Ubb PE=1 SV=1 - [UBB_RAT]	3.0821	20.98	8	1	1	1	1.65196e+06	305	34.3475	7.53271
Q68FS8	Protein Rtcd1 OS=Rattus norvegicus GN=Rtcd1 PE=2 SV=1 - [Q68FS8_RAT]	3.07466	3.55	1	1	1	1	2.39944e+06	366	39.2883	7.66455
P83868	Prostaglandin E synthase 3 OS=Rattus norvegicus GN=Ptges3 PE=1 SV=2 - [TEBP_RAT]	3.07015	8.13	1	1	1	1	704356	160	18.7094	4.55127
Q63055	ADP-ribosylation factor-related protein 1 OS=Rattus norvegicus GN=Arfrp1 PE=2 SV=1 - [ARFRP_RAT]	3.05809	10.95	1	2	2	2	357467	201	22.6444	6.55127
F1M8Q1	Protein RGD1311861 (Fragment) OS=Rattus norvegicus GN=RGD1311861 PE=2 SV=2 - [F1M8Q1_RAT]	3.04273	8.74	2	2	2	3	846175	206	22.8095	8.00146
P17220	Proteasome subunit alpha type-2 OS=Rattus norvegicus GN=Psma2 PE=1 SV=3 - [PSA2_RAT]	3.0417	5.98	2	1	1	1	739887	234	25.9103	7.43018
Q4QR85	Methylosome protein 50 OS=Rattus norvegicus GN=Wdr77 PE=1 SV=1 - [MEP50_RAT]	3.03341	4.39	3	1	1	1	775425	342	37.0521	5.2749
G3V9Y9	Adaptor-related protein complex 3, sigma 1 subunit (Predicted), isoform CRA_a OS=Rattus norvegicus GN=Ap3s1 PE=4 SV=1 - [G3V9Y9_RAT]	3.03217	9.55	2	1	1	1	892612	157	18.1231	5.08447
M0RDU8	Protein LOC100912469 OS=Rattus norvegicus GN=LOC100912469 PE=4 SV=1 - [M0RDU8_RAT]	3.0285	4.75	2	1	1	1		358	40.9817	8.80713
M0R6F5	Uncharacterized protein (Fragment) OS=Rattus norvegicus PE=4 SV=1 - [M0R6F5_RAT]	3.01527	4.54	2	2	2	2	922264	485	52.0768	6.80029
G3V6V1	Aminopeptidase B OS=Rattus norvegicus GN=Rnpep PE=4 SV=1 - [G3V6V1_RAT]	2.97757	5.85	3	3	3	3	632498	650	72.6423	5.59229
P08011	Microsomal glutathione S-transferase 1 OS=Rattus norvegicus GN=Mgst1 PE=1 SV=3 - [MGST1_RAT]	2.95883	8.39	1	1	1	1	3.11073e+06	155	17.4602	9.61279
M0RAP9	Uncharacterized protein OS=Rattus norvegicus PE=4 SV=1 - [M0RAP9_RAT]	2.89624	3.64	2	2	2	2	1.27031e+06	632	67.3424	8.20654
P17246	Transforming growth factor beta-1 OS=Rattus norvegicus GN=Tgfb1 PE=1 SV=1 - [TGFB1_RAT]	2.88781	3.33	1	1	1	1	1.74327e+06	390	44.3006	8.52881
F1M1U0	Protein Mxra7 OS=Rattus norvegicus GN=Mxra7 PE=4 SV=2 - [F1M1U0_RAT]	2.88594	9.59	2	1	1	1	407630	146	15.8837	4.1958
Q566E2	Dnajc7 protein OS=Rattus norvegicus GN=Dnajc7 PE=2 SV=1 - [Q566E2_RAT]	2.8837	2.51	3	1	1	1	1.44726e+06	438	50.0688	8.11865
Q5RJL1	Cbx3 protein OS=Rattus norvegicus GN=Cbx3 PE=4 SV=1 - [Q5RJL1_RAT]	2.87425	18.31	2	1	1	1	535573	71	7.92221	9.30518
A1L1K3	Anaphase-promoting complex subunit 5 OS=Rattus norvegicus GN=Anapc5 PE=2 SV=1 - [APC5_RAT]	2.87374	1.51	1	1	1	1	610262	727	81.6871	6.771
Q5I0K8	28S ribosomal protein S7, mitochondrial OS=Rattus norvegicus GN=Mrps7 PE=2 SV=2 - [RT07_RAT]	2.8703	4.96	1	1	1	1	901204	242	28.1788	10.0229
B2GV72	Carbonyl reductase 3 OS=Rattus norvegicus GN=Cbr3 PE=2 SV=1 - [B2GV72_RAT]	2.86686	4.33	1	1	1	1	429153	277	30.8218	6.90283
B6DTP5	DEAD (Asp-Glu-Ala-Asp) box polypeptide 5 (Fragment) OS=Rattus norvegicus GN=Ddx5 PE=2 SV=1 - [B6DTP5_RAT]	2.85955	4.72	3	3	3	3	2.93592e+06	614	69.0687	8.85107
P04762	Catalase OS=Rattus norvegicus GN=Cat PE=1 SV=3 - [CATA_RAT]	2.84352	2.47	1	1	1	1	312678	527	59.7195	7.50342
D4A786	Protein LOC100360002 OS=Rattus norvegicus GN=LOC100362685 PE=4 SV=1 - [D4A786_RAT]	2.83806	17.24	3	1	1	1	3.81743e+06	58	6.37736	9.83252
Q4V8E2	Proteasome (Prosome, macropain) 26S subunit, non-ATPase, 14 OS=Rattus norvegicus GN=Psmd14 PE=2 SV=1 - [Q4V8E2_RAT]	2.83235	4.19	1	1	1	1	3.68891e+06	310	34.5546	6.52197
D3ZZL3	Protein Naglu OS=Rattus norvegicus GN=Naglu PE=4 SV=2 - [D3ZZL3_RAT]	2.82579	1.89	1	1	1	1	372694	739	82.3597	6.25244
D3ZID4	Protein Nipbl (Fragment) OS=Rattus norvegicus GN=Nipbl PE=2 SV=2 - [D3ZID4_RAT]	2.81953	0.71	1	1	1	1		2681	302.324	8.14795
P41565	Isocitrate dehydrogenase [NAD] subunit gamma 1, mitochondrial OS=Rattus norvegicus GN=Idh3g PE=2 SV=2 - [IDHG1_RAT]	2.81923	2.8	2	1	1	1	2.50455e+06	393	42.8242	8.89502
G3V6Q6	Guanine nucleotide binding protein, alpha 11 OS=Rattus norvegicus GN=Gna11 PE=4 SV=1 - [G3V6Q6_RAT]	2.81506	5.01	7	2	2	2	1.21783e+06	359	42.0175	6.29053
O35796	Complement component 1 Q subcomponent-binding protein, mitochondrial OS=Rattus norvegicus GN=C1qbp PE=1 SV=2 - [C1QBP_RAT]	2.80324	7.17	1	1	1	1	453767	279	30.9775	4.86865
Q6P7Q1	BRCA1-A complex subunit BRE OS=Rattus norvegicus GN=Bre PE=2 SV=1 - [BRE_RAT]	2.7869	6.27	1	2	2	2	558476	383	43.5309	5.93506
Q5U4E4	Protein Trmt1 OS=Rattus norvegicus GN=Trmt1 PE=2 SV=1 - [Q5U4E4_RAT]	2.78287	2.5	1	1	1	1	517031	440	47.6129	6.03662
F1LQ05	Endophilin-A1 (Fragment) OS=Rattus norvegicus GN=Sh3gl2 PE=2 SV=1 - [F1LQ05_RAT]	2.7746	3.55	3	1	1	1	641656	338	38.3472	5.13525
D4A6W6	Protein RGD1561333 OS=Rattus norvegicus GN=RGD1561333 PE=3 SV=1 - [D4A6W6_RAT]	2.76381	4.28	2	1	1	1	1.73409e+06	257	28.1393	10.7847
B5DF91	ELAV (Embryonic lethal, abnormal vision, Drosophila)-like 1 (Hu antigen R) OS=Rattus norvegicus GN=Elavl1 PE=2 SV=1 - [B5DF91_RAT]	2.75767	3.37	1	1	1	1	448350	326	36.1461	9.0415
G3V7J2	Interferon-inducible double stranded RNA-dependent protein kinase activator A OS=Rattus norvegicus GN=Prkra PE=4 SV=1 - [G3V7J2_RAT]	2.73547	3.19	2	1	1	1	922318	313	34.3636	8.55811
Q5M856	Kinetochore protein Spc25 OS=Rattus norvegicus GN=Spc25 PE=2 SV=1 - [SPC25_RAT]	2.69219	4.87	1	1	1	1	436844	226	26.1727	8.44092
D4A864	Protein Galnt6 OS=Rattus norvegicus GN=Galnt6 PE=3 SV=1 - [D4A864_RAT]	2.68682	1.45	1	1	1	1	1.02729e+06	622	71.3691	8.36768
P63077	Guanine nucleotide-binding protein G(I)/G(S)/G(O) subunit gamma-8 OS=Rattus norvegicus GN=Gng8 PE=2 SV=1 - [GBG8_RAT]	2.68632	22.86	1	1	1	1	514795	70	7.83806	7.13721
P61023	Calcineurin B homologous protein 1 OS=Rattus norvegicus GN=Chp1 PE=1 SV=2 - [CHP1_RAT]	2.68518	6.15	1	1	1	1	514049	195	22.4183	5.09717
Q5RJY4-2	Isoform 2 of Dehydrogenase/reductase SDR family member 7B OS=Rattus norvegicus GN=Dhrs7b - [DRS7B_RAT]	2.67091	3.8	3	1	1	1	475073	316	34.3761	9.42236
F1M1H0	Protein Dera (Fragment) OS=Rattus norvegicus GN=Dera PE=4 SV=2 - [F1M1H0_RAT]	2.66539	3.88	1	1	1	1	1.10426e+06	309	34.132	8.67529
P62483	Voltage-gated potassium channel subunit beta-2 OS=Rattus norvegicus GN=Kcnab2 PE=1 SV=1 - [KCAB2_RAT]	2.6592	2.72	1	1	1	1	1.63887e+06	367	40.995	8.99756
Q5U2X0	CDKN2A-interacting protein OS=Rattus norvegicus GN=Cdkn2aip PE=2 SV=1 - [CARF_RAT]	2.64566	2.46	1	1	1	1	148954	570	60.7067	9.20264
D4A8B1	Bardet-Biedl syndrome 4 homolog (Human) (Predicted) OS=Rattus norvegicus GN=Bbs4 PE=4 SV=1 - [D4A8B1_RAT]	2.64155	2.12	1	1	1	1	381147	520	58.2301	7.82568
F1M470	Protein Eif4e2 (Fragment) OS=Rattus norvegicus GN=Eif4e2 PE=2 SV=1 - [F1M470_RAT]	2.63716	6.56	2	1	1	2	2.41395e+06	244	28.1531	8.88037
Q792I0	Protein lin-7 homolog C OS=Rattus norvegicus GN=Lin7c PE=1 SV=1 - [LIN7C_RAT]	2.63229	8.63	1	1	2	3	1.13263e+06	197	21.8205	8.42627
D4AB03	Protein Fam120a OS=Rattus norvegicus GN=Fam120a PE=4 SV=2 - [D4AB03_RAT]	2.6303	1.26	1	1	1	1	220308	1115	122.064	8.83643
P32089	Tricarboxylate transport protein, mitochondrial OS=Rattus norvegicus GN=Slc25a1 PE=1 SV=1 - [TXTP_RAT]	2.62451	3.54	1	1	1	1	948366	311	33.8138	9.86182
D4A2D3	Protein Mycbp2 (Fragment) OS=Rattus norvegicus GN=Mycbp2 PE=2 SV=2 - [D4A2D3_RAT]	2.62358	0.37	1	1	1	1	101261	3278	357.773	7.26904
D0UFD0	Prostate leucine zipper variant 2 OS=Rattus norvegicus GN=Tpd52 PE=2 SV=1 - [D0UFD0_RAT]	2.61908	6.25	2	1	1	1	400429	224	24.224	4.71631
Q62785	28 kDa heat- and acid-stable phosphoprotein OS=Rattus norvegicus GN=Pdap1 PE=1 SV=1 - [HAP28_RAT]	2.60391	7.18	1	1	1	1	388189	181	20.5925	7.38623
Q5RK25	Phosphomannomutase 1 OS=Rattus norvegicus GN=Pmm1 PE=2 SV=1 - [Q5RK25_RAT]	2.60119	5.34	1	1	1	1	308505	262	29.67	5.59229
G3C8Z1	E3 ubiquitin-protein ligase MGRN1 isoform I OS=Rattus norvegicus GN=mgrn1 PE=2 SV=1 - [G3C8Z1_RAT]	2.59977	1.88	5	1	1	1	443391	532	58.495	4.86865
Q6IRJ7	Annexin OS=Rattus norvegicus GN=Anxa7 PE=2 SV=1 - [Q6IRJ7_RAT]	2.59622	2.38	2	1	1	1	1.912e+06	463	49.9873	6.17627
Q99JC6	Protein Tapbp OS=Rattus norvegicus GN=Tapbp PE=2 SV=1 - [Q99JC6_RAT]	2.54964	4.09	1	2	2	2	1.34367e+06	464	50.0132	7.88428
Q9WVK7	Hydroxyacyl-coenzyme A dehydrogenase, mitochondrial OS=Rattus norvegicus GN=Hadh PE=2 SV=1 - [HCDH_RAT]	2.54794	5.73	1	2	2	3	1.36579e+06	314	34.4259	8.76318
Q6P689	Protein wntless homolog OS=Rattus norvegicus GN=Wls PE=1 SV=1 - [WLS_RAT]	2.5411	1.85	1	1	1	1	1.09057e+06	541	62.1606	7.50342
Q5M808	Protein Hikeshi OS=Rattus norvegicus PE=2 SV=2 - [HIKES_RAT]	2.53745	6.6	1	1	1	1	905794	197	21.6048	5.45264
Q5M7T2	SPRY domain-containing protein 7 OS=Rattus norvegicus GN=Spryd7 PE=2 SV=1 - [SPRY7_RAT]	2.5343	5.1	1	1	1	1		196	21.6666	6.69775
D3ZDZ7	Fucokinase (Predicted) OS=Rattus norvegicus GN=Fuk PE=3 SV=1 - [D3ZDZ7_RAT]	2.53068	1.28	1	1	1	1	334642	1019	111.113	6.41748
Q5XFW3	Ugp2 protein (Fragment) OS=Rattus norvegicus GN=Ugp2 PE=2 SV=1 - [Q5XFW3_RAT]	2.51671	6.48	2	2	2	2	902493	293	32.475	6.31592
B0BNB9	HtrA serine peptidase 2 OS=Rattus norvegicus GN=Htra2 PE=2 SV=1 - [B0BNB9_RAT]	2.51586	3.28	1	1	1	1	68306.4	458	49.064	9.49561
Q5BJP2	Spliceosome-associated protein CWC15 homolog OS=Rattus norvegicus GN=Cwc15 PE=2 SV=1 - [CWC15_RAT]	2.51519	4.8	1	1	1	1	89608.6	229	26.6223	5.70654
M0R9D5	Uncharacterized protein OS=Rattus norvegicus PE=4 SV=1 - [M0R9D5_RAT]	2.51308	0.28	1	1	1	1	489042	5363	571.304	6.22705
P29266	3-hydroxyisobutyrate dehydrogenase, mitochondrial OS=Rattus norvegicus GN=Hibadh PE=1 SV=3 - [3HIDH_RAT]	2.51246	3.88	1	1	1	1	526682	335	35.2796	8.47021
P01041	Cystatin-B OS=Rattus norvegicus GN=Cstb PE=1 SV=1 - [CYTB_RAT]	2.50961	11.22	1	1	1	1	2.20316e+06	98	11.1886	6.30322
D4A4H5	Protein Sdf2 OS=Rattus norvegicus GN=Sdf2 PE=4 SV=2 - [D4A4H5_RAT]	2.50937	12.79	21	1	2	2	4.16461e+06	219	24.041	7.92822
D3ZTW7	ATP synthase mitochondrial F1 complex assembly factor 2 (Predicted), isoform CRA_c OS=Rattus norvegicus GN=Atpaf2 PE=4 SV=1 - [D3ZTW7_RAT]	2.49946	4.03	1	1	1	1	385262	298	34.1706	6.55127
D4A914	5'-3' exoribonuclease 2 (Predicted), isoform CRA_c OS=Rattus norvegicus GN=Xrn2 PE=4 SV=2 - [D4A914_RAT]	2.48905	2.14	1	1	1	1	60411.3	561	63.8279	8.85107
F1LX22	Uncharacterized protein OS=Rattus norvegicus PE=2 SV=2 - [F1LX22_RAT]	2.4812	9.18	2	1	3	5	1.01138e+06	403	45.7131	6.87354
M0RBK9	Protein Pnkd OS=Rattus norvegicus GN=Pnkd PE=4 SV=1 - [M0RBK9_RAT]	2.48078	7.75	1	1	1	1	84399.6	142	15.5881	10.272
Q63089-2	Isoform 2 of Solute carrier family 22 member 1 OS=Rattus norvegicus GN=Slc22a1 - [S22A1_RAT]	2.47917	3.72	2	1	1	1	1.29144e+07	430	47.646	8.99756
D3ZP13	Protein Qsox2 OS=Rattus norvegicus GN=Qsox2 PE=4 SV=1 - [D3ZP13_RAT]	2.47845	1.41	1	1	1	1	1.32282e+06	708	79.1474	8.26514
Q4V7F2	Cysteine-rich with EGF-like domain protein 1 OS=Rattus norvegicus GN=Creld1 PE=2 SV=1 - [CREL1_RAT]	2.46099	2.62	1	1	1	1	688918	420	45.666	5.0083
D3ZUM2	Protein Sarm1 OS=Rattus norvegicus GN=Sarm1 PE=4 SV=1 - [D3ZUM2_RAT]	2.45717	1.66	1	1	1	1		724	79.6381	6.16357
D4A465	Protein Lamtor2 OS=Rattus norvegicus GN=Lamtor2 PE=4 SV=1 - [D4A465_RAT]	2.45465	9.6	1	1	1	1	846213	125	13.4718	5.40186
F8WFH8	Tryptophan--tRNA ligase, cytoplasmic OS=Rattus norvegicus GN=Wars PE=3 SV=1 - [F8WFH8_RAT]	2.45442	6.95	2	3	3	3	624484	475	53.3927	6.60986
D4AEH3	Proteasome (Prosome, macropain) 26S subunit, non-ATPase, 7 (Predicted) OS=Rattus norvegicus GN=Psmd7 PE=4 SV=1 - [D4AEH3_RAT]	2.4444	3.13	1	1	1	1	1.32595e+06	320	36.4692	6.81494
F1M3H8	Protein Hnrnpa0 OS=Rattus norvegicus GN=Hnrnpa0 PE=4 SV=2 - [F1M3H8_RAT]	2.44194	7.26	2	1	2	3	1.77918e+06	303	30.2776	9.30518
G3V6S3	Calumenin OS=Rattus norvegicus GN=Calu PE=4 SV=1 - [G3V6S3_RAT]	2.44002	8.25	2	2	2	2	479083	315	37.0405	4.66553
Q6AY04	Uncharacterized protein C2orf47 homolog, mitochondrial OS=Rattus norvegicus PE=2 SV=1 - [CB047_RAT]	2.43889	8.93	1	3	3	3	957216	291	33.0692	9.0415
O88629	Splicing factor 1 homolog (Fragment) OS=Rattus norvegicus GN=Sf1 PE=2 SV=1 - [O88629_RAT]	2.43111	5.78	4	1	1	1	652120	173	19.3681	8.25049
Q4V8C0	DNA primase large subunit OS=Rattus norvegicus GN=Prim2 PE=2 SV=1 - [Q4V8C0_RAT]	2.42628	2.27	2	1	1	1	69067.7	484	55.8334	8.45557
F1LPB9	Rabphilin-3A OS=Rattus norvegicus GN=Rph3a PE=2 SV=1 - [F1LPB9_RAT]	2.4244	2.19	2	1	1	1	181575	684	75.7557	8.17725
D3ZS37	Uncharacterized protein (Fragment) OS=Rattus norvegicus GN=Ears2 PE=3 SV=2 - [D3ZS37_RAT]	2.40875	2.42	3	1	1	1	342608	414	46.2872	7.57666
Q5U3Z5	Bri3 binding protein OS=Rattus norvegicus GN=Bri3bp PE=2 SV=1 - [Q5U3Z5_RAT]	2.40823	7.51	21	1	2	2	4.35491e+06	253	28.2981	8.92432
Q9Z1L1	Claudin-7 OS=Rattus norvegicus GN=Cldn7 PE=1 SV=2 - [CLD7_RAT]	2.40643	7.58	1	1	1	1	221242	211	22.4162	8.70459
Q99J86-2	Isoform 2 of Attractin OS=Rattus norvegicus GN=Atrn - [ATRN_RAT]	2.40208	1.02	2	1	1	1	646666	1275	141.428	7.00537
D3ZB30	Polypyrimidine tract binding protein 1, isoform CRA_c OS=Rattus norvegicus GN=Ptbp1 PE=4 SV=1 - [D3ZB30_RAT]	2.40158	3.4	7	2	2	3	1.33887e+06	530	56.9004	9.17334
F1M175	Protein Cog5 OS=Rattus norvegicus GN=Cog5 PE=4 SV=2 - [F1M175_RAT]	2.40088	3.14	1	2	2	2	355010	829	91.1281	6.03662
A0JN25	Microtubule-associated protein OS=Rattus norvegicus GN=Mapt PE=2 SV=1 - [A0JN25_RAT]	2.40046	3.21	16	1	1	1	309697	343	35.8743	9.43701
Q5XI72	Eukaryotic translation initiation factor 4H OS=Rattus norvegicus GN=Eif4h PE=1 SV=1 - [IF4H_RAT]	2.3989	5.24	1	1	1	1	540523	248	27.3074	7.2251
D3ZCM4	DnaJ (Hsp40) homolog, subfamily C, member 15 (Predicted), isoform CRA_a OS=Rattus norvegicus GN=Dnajc15 PE=4 SV=1 - [D3ZCM4_RAT]	2.3986	9.4	1	1	1	1	219389	149	15.9814	10.0376
Q8CHN6	Sphingosine-1-phosphate lyase 1 OS=Rattus norvegicus GN=Sgpl1 PE=2 SV=1 - [SGPL1_RAT]	2.39022	3.87	1	2	2	2	691079	568	63.7169	9.17334
D3ZQH6	Protein Pla2g4d OS=Rattus norvegicus GN=Pla2g4d PE=4 SV=1 - [D3ZQH6_RAT]	2.3894	1.82	1	1	1	1		825	92.8647	5.2749
Q5U2R9	Protein Scfd2 OS=Rattus norvegicus GN=Scfd2 PE=2 SV=1 - [Q5U2R9_RAT]	2.38923	3.36	1	2	2	2	354723	684	74.747	6.771
F1M8K7	Protein Alg3 OS=Rattus norvegicus GN=Alg3 PE=4 SV=2 - [F1M8K7_RAT]	2.38884	3.42	4	2	2	2	290555	438	50.1476	9.45166
D4A0E8	Protein Prmt5 OS=Rattus norvegicus GN=Prmt5 PE=4 SV=1 - [D4A0E8_RAT]	2.38775	5.65	1	3	3	3	519264	637	72.6485	6.26514
B1WC34	Protein Prkcsh OS=Rattus norvegicus GN=Prkcsh PE=2 SV=1 - [B1WC34_RAT]	2.38422	2.29	1	1	1	1	1.102e+06	525	59.1811	4.4751
A1L1K9	Ring finger and SPRY domain containing 1 OS=Rattus norvegicus GN=Rspry1 PE=2 SV=1 - [A1L1K9_RAT]	2.38361	3.3	2	1	1	1	1.34329e+07	576	64.334	5.50342
D3ZSP1	Protein LOC100361838 OS=Rattus norvegicus GN=Snrpe PE=4 SV=1 - [D3ZSP1_RAT]	2.38319	11.96	4	1	1	1	705043	92	10.7536	9.15869
D4A040	Protein Mrps11 OS=Rattus norvegicus GN=Mrps11 PE=3 SV=1 - [D4A040_RAT]	2.37995	8.38	2	1	1	1	209525	191	20.1556	10.7993
D3ZFR9	Protein Rdh13 OS=Rattus norvegicus GN=Rdh13 PE=3 SV=1 - [D3ZFR9_RAT]	2.37563	6.29	1	2	2	2	1.52991e+06	334	36.385	8.86572
D4A3T3	Protein Cbx1 OS=Rattus norvegicus GN=Cbx1 PE=4 SV=1 - [D4A3T3_RAT]	2.37015	5.95	1	1	1	1	1.43168e+06	185	21.3906	4.93213
P55770	NHP2-like protein 1 OS=Rattus norvegicus GN=Nhp2l1 PE=2 SV=4 - [NH2L1_RAT]	2.3628	9.38	1	1	1	1	868796	128	14.1646	8.45557
D3Z7Z5	Protein Ranbp10 OS=Rattus norvegicus GN=Ranbp10 PE=4 SV=1 - [D3Z7Z5_RAT]	2.35811	1.54	1	1	1	1	475285	648	70.0019	6.68311
P28064	Proteasome subunit beta type-8 OS=Rattus norvegicus GN=Psmb8 PE=1 SV=3 - [PSB8_RAT]	2.35512	3.99	1	1	1	1	1.41643e+06	276	30.5499	7.41553
B5DEN9	Vacuolar protein sorting-associated protein 28 homolog OS=Rattus norvegicus GN=Vps28 PE=2 SV=1 - [VPS28_RAT]	2.35152	4.39	1	1	1	1	448980	228	26.093	5.52881
D3ZLX3	Protein Mob2 OS=Rattus norvegicus GN=Mob2 PE=4 SV=1 - [D3ZLX3_RAT]	2.34485	7.66	1	2	2	2	1.10912e+06	235	26.8073	6.52197
D3ZX38	Prefoldin 1 (Predicted) OS=Rattus norvegicus GN=Pfdn1 PE=4 SV=1 - [D3ZX38_RAT]	2.34308	9.02	1	1	1	1	1.31636e+06	122	14.2465	6.81494
D3ZTD1	Mitogen-activated protein kinase kinase kinase 14 (Predicted), isoform CRA_a OS=Rattus norvegicus GN=Map3k14 PE=3 SV=1 - [D3ZTD1_RAT]	2.34184	1.49	1	1	1	1		942	103.519	7.76709
D3ZW38	Protein Exosc6 OS=Rattus norvegicus GN=Exosc6 PE=4 SV=1 - [D3ZW38_RAT]	2.34086	8.82	1	2	2	4	1.03461e+06	272	28.3816	5.78271
D3ZAF6	ATP synthase subunit f, mitochondrial OS=Rattus norvegicus GN=Atp5j2 PE=1 SV=1 - [ATPK_RAT]	2.33888	23.86	1	2	2	2	3.57044e+06	88	10.4456	10.0376
P12785	Fatty acid synthase OS=Rattus norvegicus GN=Fasn PE=1 SV=3 - [FAS_RAT]	2.33659	0.68	1	2	2	2	679039	2505	272.478	6.39209
D3ZXH7	Protein Thoc4 OS=Rattus norvegicus GN=Thoc4 PE=4 SV=1 - [D3ZXH7_RAT]	2.33392	5.82	1	1	1	2	3.89021e+06	189	19.9032	9.86182
B5DFC6	Gnpda1 protein OS=Rattus norvegicus GN=Gnpda1 PE=2 SV=1 - [B5DFC6_RAT]	2.30846	6.23	1	2	2	2	5.11511e+06	289	32.5585	6.7417
M0RBH0	Protein LOC681193 OS=Rattus norvegicus GN=LOC681193 PE=4 SV=1 - [M0RBH0_RAT]	2.30721	13.43	3	1	1	1	3.05847e+06	67	7.63999	7.76709
Q5FVL2	ER membrane protein complex subunit 8 OS=Rattus norvegicus GN=Emc8 PE=2 SV=1 - [EMC8_RAT]	2.30718	4.35	1	1	1	1	1.48978e+06	207	23.3904	6.15088
P12788	Trypsin-4 OS=Rattus norvegicus GN=Try4 PE=2 SV=1 - [TRY4_RAT]	2.30638	8.1	1	1	1	1	87443.4	247	26.5561	6.82959
F1LZ53	Protein Exoc6b OS=Rattus norvegicus GN=Exoc6b PE=4 SV=2 - [F1LZ53_RAT]	2.30586	2.47	1	1	1	2	258988	809	94.1501	6.45557
Q6TPJ7	S15 ribosomal protein (Fragment) OS=Rattus norvegicus GN=Rps15 PE=2 SV=1 - [Q6TPJ7_RAT]	2.30367	10.53	3	1	1	1	3.12613e+06	114	13.3511	10.1987
Q5M7T6	ATPase, H+ transporting, lysosomal 38kDa, V0 subunit d1 OS=Rattus norvegicus GN=Atp6v0d1 PE=2 SV=1 - [Q5M7T6_RAT]	2.30273	3.7	1	1	1	1	582865	351	40.2752	4.99561
Q6P799	Serine--tRNA ligase, cytoplasmic OS=Rattus norvegicus GN=Sars PE=1 SV=3 - [SYSC_RAT]	2.30128	4.69	1	2	2	3	1.42058e+06	512	58.5508	6.18896
O35263	Platelet-activating factor acetylhydrolase IB subunit gamma OS=Rattus norvegicus GN=Pafah1b3 PE=2 SV=1 - [PA1B3_RAT]	2.29692	3.88	1	1	1	1	163135	232	25.8473	6.93213
F1LSA7	Chromaffin granule amine transporter OS=Rattus norvegicus GN=Slc18a1 PE=2 SV=1 - [F1LSA7_RAT]	2.28738	1.54	2	1	1	1	2.23214e+06	521	55.9321	5.66846
G3V6Z3	Actin filament-associated protein 1 OS=Rattus norvegicus GN=Afap1 PE=4 SV=1 - [G3V6Z3_RAT]	2.28681	1.23	2	1	1	1	585869	731	80.6967	8.67529
G3V6P2	Dihydrolipoamide S-succinyltransferase (E2 component of 2-oxo-glutarate complex), isoform CRA_a OS=Rattus norvegicus GN=Dlst PE=3 SV=1 - [G3V6P2_RAT]	2.28547	4.19	4	2	2	2	1.69129e+06	454	48.8684	8.70459
B1H239	Leucine rich repeat containing 49 (Predicted) OS=Rattus norvegicus GN=Lrrc49 PE=2 SV=1 - [B1H239_RAT]	2.28245	2.92	1	1	1	1	85551.6	686	78.888	8.08936
Q6AY55	Dephospho-CoA kinase domain-containing protein OS=Rattus norvegicus GN=Dcakd PE=2 SV=1 - [DCAKD_RAT]	2.26728	6.25	1	1	1	1	818201	240	27.3347	9.68604
D4AED2	Protein Dda1 OS=Rattus norvegicus GN=Dda1 PE=4 SV=1 - [D4AED2_RAT]	2.25596	11.76	1	1	1	1	244962	102	11.7459	8.67529
F1LR22	Uncharacterized protein (Fragment) OS=Rattus norvegicus PE=4 SV=2 - [F1LR22_RAT]	2.2539	3.12	2	1	1	1	1.85504e+06	353	40.8897	7.26904
D3ZCD4	Phosphatidylinositol transfer protein beta isoform (Fragment) OS=Rattus norvegicus GN=Pitpnb PE=2 SV=2 - [D3ZCD4_RAT]	2.2521	3.69	3	1	1	1	241188	271	31.4148	6.25244
D4A626	Protein Clmn OS=Rattus norvegicus GN=Clmn PE=2 SV=1 - [D4A626_RAT]	2.24069	0.78	1	1	1	1	617945	1021	113.791	4.94482
P35745	Acylphosphatase-2 OS=Rattus norvegicus GN=Acyp2 PE=1 SV=2 - [ACYP2_RAT]	2.2345	13.4	2	1	1	1	542203	97	10.8565	9.26123
Q5M9G3	Caprin-1 OS=Rattus norvegicus GN=Caprin1 PE=1 SV=2 - [CAPR1_RAT]	2.23276	1.7	1	1	1	1		707	78.0729	5.24951
O89045	DNA primase (Fragment) OS=Rattus norvegicus GN=Prim1 PE=2 SV=1 - [O89045_RAT]	2.2321	2.17	1	1	1	1	783513	415	49.109	8.49951
Q6PDW8	Glutathione peroxidase OS=Rattus norvegicus GN=Gpx1 PE=2 SV=1 - [Q6PDW8_RAT]	2.22074	11.72	2	1	1	1	211138	145	16.4784	7.25439
Q5FVI4	Cell cycle exit and neuronal differentiation protein 1 OS=Rattus norvegicus GN=Cend1 PE=1 SV=1 - [CEND_RAT]	2.21998	10.74	1	1	1	1	53307	149	15.0339	8.96826
Q5U2Q7	Eukaryotic peptide chain release factor subunit 1 OS=Rattus norvegicus GN=Etf1 PE=2 SV=3 - [ERF1_RAT]	2.21991	2.29	1	1	1	1	170474	437	49.0002	5.70654
F1LSH0	Protein Sympk OS=Rattus norvegicus GN=Sympk PE=2 SV=2 - [F1LSH0_RAT]	2.21623	0.86	1	1	1	1		1280	142.039	6.04932
Q62717	Calcium-dependent secretion activator 1 OS=Rattus norvegicus GN=Cadps PE=1 SV=1 - [CAPS1_RAT]	2.21377	0.93	1	1	1	1	526932	1289	146.173	5.8208
F1LZF4	Uncharacterized protein OS=Rattus norvegicus PE=2 SV=2 - [F1LZF4_RAT]	2.21025	0.54	1	1	1	1		2616	287.251	6.46826
Q5I0D1	Glyoxalase domain-containing protein 4 OS=Rattus norvegicus GN=Glod4 PE=1 SV=1 - [GLOD4_RAT]	2.20914	3.36	1	1	1	1	435644	298	33.2465	5.2749
P61212	ADP-ribosylation factor-like protein 1 OS=Rattus norvegicus GN=Arl1 PE=1 SV=1 - [ARL1_RAT]	2.20496	8.29	1	2	2	4	7.03039e+06	181	20.3985	5.71924
Q498C9	Protein Zfp207 OS=Rattus norvegicus GN=Zfp207 PE=2 SV=1 - [Q498C9_RAT]	2.19885	2.8	1	1	1	1	483706	464	49.7447	9.1001
D3ZUC2	Protein Mov10 OS=Rattus norvegicus GN=Mov10 PE=4 SV=1 - [D3ZUC2_RAT]	2.19567	1	1	1	1	1		1004	113.689	9.1001
P61203-2	Isoform 2 of COP9 signalosome complex subunit 2 OS=Rattus norvegicus GN=Cops2 - [CSN2_RAT]	2.1941	2.49	2	1	1	1	219263	402	46.8843	5.16064
B2RYU6	Trafficking protein particle complex subunit 2-like protein OS=Rattus norvegicus GN=Trappc2l PE=2 SV=1 - [TPC2L_RAT]	2.19196	6.47	1	1	1	1	866826	139	16.0209	6.771
D3ZMR7	Protein Tubgcp3 OS=Rattus norvegicus GN=Tubgcp3 PE=4 SV=1 - [D3ZMR7_RAT]	2.18995	1.82	1	1	1	1	133006	606	67.856	8.88037
D3ZD48	Protein Rab11fip2 OS=Rattus norvegicus GN=Rab11fip2 PE=2 SV=2 - [D3ZD48_RAT]	2.18847	1.76	1	1	1	1	2.61903e+06	512	58.1716	9.42236
D3ZN38	Protein Stard5 OS=Rattus norvegicus GN=Stard5 PE=4 SV=1 - [D3ZN38_RAT]	2.18273	7.51	1	1	1	1		213	23.9398	6.52197
M0RC20	Protein RGD1564039 (Fragment) OS=Rattus norvegicus GN=RGD1564039 PE=4 SV=1 - [M0RC20_RAT]	2.18134	6.25	1	1	1	1		176	21.0426	8.98291
F1LVM4	Protein Ap3s2 (Fragment) OS=Rattus norvegicus GN=Ap3s2 PE=4 SV=2 - [F1LVM4_RAT]	2.17948	6.47	2	1	1	1	487047	170	19.1748	4.729
M0R6T4	Protein Mms19l OS=Rattus norvegicus GN=Mms19l PE=4 SV=1 - [M0R6T4_RAT]	2.1783	1.07	1	1	1	1	326781	1031	112.86	6.23975
D4A478	Protein Ntpcr OS=Rattus norvegicus GN=Ntpcr PE=3 SV=1 - [D4A478_RAT]	2.17537	4.69	1	1	1	1	888988	192	20.8002	9.83252
Q69BT7	Trafficking protein particle complex subunit 4 OS=Rattus norvegicus GN=Trappc4 PE=2 SV=1 - [TPPC4_RAT]	2.17054	4.11	1	1	1	1	2.38531e+06	219	24.3435	6.21436
D3ZJD3	Protein RGD1565183 OS=Rattus norvegicus GN=LOC100362069 PE=4 SV=1 - [D3ZJD3_RAT]	2.15969	8.03	4	1	1	1	1.30385e+06	137	15.5555	11.9272
Q9JKT0	SH3-domain GRB2-like 3 OS=Rattus norvegicus GN=Sh3gl3 PE=2 SV=1 - [Q9JKT0_RAT]	2.15412	2.88	3	1	1	1	440398	312	35.292	5.03369
B2RYS6	Phosphoribosyl transferase domain containing 1 OS=Rattus norvegicus GN=Prtfdc1 PE=2 SV=1 - [B2RYS6_RAT]	2.15237	4.44	1	1	1	1	732405	225	25.541	6.30322
A1A5Q1	Parp9 protein OS=Rattus norvegicus GN=Parp9 PE=2 SV=1 - [A1A5Q1_RAT]	2.15189	1.45	1	1	1	1		830	92.1557	6.93213
Q0D2L2	Protein LOC683519 OS=Rattus norvegicus GN=LOC683519 PE=2 SV=1 - [Q0D2L2_RAT]	2.15084	3.06	1	1	1	1	595316	359	41.2094	8.30908
F1LWX1	Protein LOC100910714 (Fragment) OS=Rattus norvegicus GN=LOC100910714 PE=3 SV=1 - [F1LWX1_RAT]	2.14875	8.49	3	1	1	1	836069	106	12.4087	10.3892
E9PSZ5	Uncharacterized protein OS=Rattus norvegicus PE=2 SV=2 - [E9PSZ5_RAT]	2.14854	1.09	2	1	1	1	170206	914	100.782	5.80811
D3ZIZ7	Uncharacterized protein (Fragment) OS=Rattus norvegicus PE=2 SV=2 - [D3ZIZ7_RAT]	2.14786	15.12	1	1	1	1	403732	86	9.70009	5.41455
F1LP76	Elongator complex protein 1 OS=Rattus norvegicus GN=Ikbkap PE=2 SV=2 - [F1LP76_RAT]	2.14764	0.83	2	1	1	1	159599	1331	149.104	6.34131
P63255	Cysteine-rich protein 1 OS=Rattus norvegicus GN=Crip1 PE=1 SV=2 - [CRIP1_RAT]	2.14703	12.99	1	1	1	2	627886	77	8.54399	8.57275
G3V7V3	Protein Slc27a4 OS=Rattus norvegicus GN=Slc27a4 PE=4 SV=1 - [G3V7V3_RAT]	2.1464	1.71	1	1	1	1	416508	643	72.1422	8.6167
F1M980	Glutaminase kidney isoform, mitochondrial OS=Rattus norvegicus GN=Gls PE=2 SV=1 - [F1M980_RAT]	2.14075	3.15	3	1	1	1	513992	476	52.9464	6.91748
Q7TT49	Serine/threonine-protein kinase MRCK beta OS=Rattus norvegicus GN=Cdc42bpb PE=1 SV=1 - [MRCKB_RAT]	2.13947	0.7	1	1	1	1	2.56103e+07	1713	194.765	6.45557
D3ZUL1	Protein Ccdc124 OS=Rattus norvegicus GN=Ccdc124 PE=4 SV=1 - [D3ZUL1_RAT]	2.13524	4.61	1	1	1	1	928288	217	25.3024	9.61279
B2GV08	Adaptor-related protein complex 1, sigma 2 subunit (Predicted), isoform CRA_a OS=Rattus norvegicus GN=Ap1s2 PE=2 SV=1 - [B2GV08_RAT]	2.12959	10.19	1	2	2	2	606521	157	18.6028	5.46533
P83888	Tubulin gamma-1 chain OS=Rattus norvegicus GN=Tubg1 PE=2 SV=1 - [TBG1_RAT]	2.12744	2	2	1	1	1	2.49693e+06	451	51.0687	6.02393
Q68FS9	COMM domain containing 10 OS=Rattus norvegicus GN=Commd10 PE=2 SV=1 - [Q68FS9_RAT]	2.12467	11.88	1	2	2	2	962010	202	22.8121	6.43018
P97576	GrpE protein homolog 1, mitochondrial OS=Rattus norvegicus GN=Grpel1 PE=1 SV=2 - [GRPE1_RAT]	2.11932	8.76	1	2	2	2	2.53718e+06	217	24.2819	8.38232
Q4V888	Transmembrane protein 55A OS=Rattus norvegicus GN=Tmem55a PE=2 SV=1 - [TM55A_RAT]	2.11865	4.28	1	1	1	1		257	28.0052	8.67529
B2RYP0	Protein Rhoc OS=Rattus norvegicus GN=Rhoc PE=2 SV=1 - [B2RYP0_RAT]	2.11545	5.7	4	1	1	1	1.60956e+06	193	22.0223	6.58057
G3V8V4	Longevity assurance homolog 2 (S. cerevisiae) OS=Rattus norvegicus GN=Cers2 PE=3 SV=1 - [G3V8V4_RAT]	2.11123	2.37	1	1	1	1	461397	380	44.9222	8.74854
M0R9X4	Protein Zzz3 OS=Rattus norvegicus GN=Zzz3 PE=4 SV=1 - [M0R9X4_RAT]	2.10951	5.65	1	1	1	1		283	32.892	6.52197
Q9JK41	High affinity copper uptake protein 1 OS=Rattus norvegicus GN=Slc31a1 PE=2 SV=1 - [COPT1_RAT]	2.10484	5.88	1	1	1	1	2.95724e+06	187	21.1144	7.41553
Q7TNA8	L-lactate dehydrogenase OS=Rattus norvegicus GN=Ldhal6b PE=2 SV=1 - [Q7TNA8_RAT]	2.10013	3.14	1	1	1	1	5.04936e+06	382	42.0222	9.40771
Q63537-2	Isoform IIb of Synapsin-2 OS=Rattus norvegicus GN=Syn2 - [SYN2_RAT]	2.09352	2.09	3	1	1	1		479	52.4214	7.94287
P84039	Ectonucleotide pyrophosphatase/phosphodiesterase family member 5 OS=Rattus norvegicus GN=Enpp5 PE=1 SV=2 - [ENPP5_RAT]	2.09064	2.1	1	1	1	1	453337	477	54.2554	6.22705
A9UMW0	Protein Ubl5 OS=Rattus norvegicus GN=Ubl5 PE=4 SV=1 - [A9UMW0_RAT]	2.08559	12.33	1	1	1	1	1834147	73	8.54143	8.44092
Q6AXX6	Redox-regulatory protein FAM213A OS=Rattus norvegicus GN=Fam213a PE=1 SV=1 - [F213A_RAT]	2.08486	5.68	1	1	1	1	126667	229	25.7465	9.14404
M0R7P0	Protein LOC100912027 OS=Rattus norvegicus GN=LOC100912027 PE=4 SV=1 - [M0R7P0_RAT]	2.08311	22.06	4	2	2	3	4.22046e+06	136	15.8117	10.5649
F1LRB7	Tumor susceptibility gene 101 protein OS=Rattus norvegicus GN=Tsg101 PE=2 SV=2 - [F1LRB7_RAT]	2.07909	2.72	2	1	1	1	421898	368	41.7706	7.04932
D4A3A9	Protein Galntl2 OS=Rattus norvegicus GN=Galnt15 PE=2 SV=2 - [D4A3A9_RAT]	2.07746	2.19	1	1	1	1		593	67.0501	6.21436
P62994-3	Isoform 3 of Growth factor receptor-bound protein 2 OS=Rattus norvegicus GN=Grb2 - [GRB2_RAT]	2.0747	16.95	3	1	1	1		59	6.87537	5.09717
D3ZD73	Protein Ddx6 OS=Rattus norvegicus GN=Ddx6 PE=3 SV=1 - [D3ZD73_RAT]	2.07204	2.28	1	1	1	1	241640	483	54.2102	8.66064
M0R8M3	Uncharacterized protein OS=Rattus norvegicus PE=4 SV=1 - [M0R8M3_RAT]	2.07028	7.14	2	1	1	1	1.55818e+06	126	13.6082	10.0083
B2RZ98	Ncf4 protein OS=Rattus norvegicus GN=Ncf4 PE=2 SV=1 - [B2RZ98_RAT]	2.0694	5.9	1	1	1	1		339	38.7219	5.90967
Q63945-2	Isoform 2 of Protein SET OS=Rattus norvegicus GN=Set - [SET_RAT]	2.06831	3.97	5	1	1	1	621003	277	32.0857	4.22119
D3ZQE8	Protein Xpo5 OS=Rattus norvegicus GN=Xpo5 PE=2 SV=1 - [D3ZQE8_RAT]	2.0671	0.83	1	1	1	1	441210	1204	136.789	5.80811
D4A280	Serine/threonine-protein kinase PAK 7 OS=Rattus norvegicus GN=Pak7 PE=1 SV=1 - [PAK7_RAT]	2.06664	3.06	1	1	1	1		718	80.8981	8.20654
B5DF95	Family with sequence similarity 164, member A OS=Rattus norvegicus GN=Fam164a PE=2 SV=1 - [B5DF95_RAT]	2.06	3.09	1	1	1	1	1.38e+06	324	35.187	9.86182
Q99MZ8	LIM and SH3 domain protein 1 OS=Rattus norvegicus GN=Lasp1 PE=1 SV=1 - [LASP1_RAT]	2.05851	3.42	1	1	1	1	822446	263	29.9514	7.04932
Q5XFX0	Transgelin-2 OS=Rattus norvegicus GN=Tagln2 PE=1 SV=1 - [TAGL2_RAT]	2.05666	5.53	1	1	1	1	1.05371e+06	199	22.3791	8.25049
B8YDD2	HS1 binding protein variant X OS=Rattus norvegicus GN=Hs1bp1 PE=2 SV=1 - [B8YDD2_RAT]	2.05351	6.82	5	1	1	1	491959	132	14.8476	4.53857
F1LYJ8	Protein Gramd4 (Fragment) OS=Rattus norvegicus GN=Gramd4 PE=4 SV=1 - [F1LYJ8_RAT]	2.0513	2.17	2	1	1	1	87532.1	599	68.6504	9.0708
F1LP57	Protein Map2k4 (Fragment) OS=Rattus norvegicus GN=Map2k4 PE=4 SV=2 - [F1LP57_RAT]	2.04447	3.32	2	1	1	1		361	41.075	8.06006
D3ZN79	Protein LOC686074 OS=Rattus norvegicus GN=LOC681918 PE=3 SV=1 - [D3ZN79_RAT]	2.04275	8.13	3	1	1	1	4.24575e+06	123	14.4894	10.8286
D4A3V2	NADH dehydrogenase [ubiquinone] 1 alpha subcomplex subunit 6 OS=Rattus norvegicus GN=Ndufa6 PE=3 SV=1 - [D4A3V2_RAT]	2.04149	6.15	1	1	1	1	2.99199e+06	130	15.2141	10.1548
B2GUY5	Armc7 protein OS=Rattus norvegicus GN=Armc7 PE=2 SV=1 - [B2GUY5_RAT]	2.03787	6.57	1	1	1	1	168420	198	21.7941	5.14795
D4A062	Protein Slitrk3 OS=Rattus norvegicus GN=Slitrk3 PE=4 SV=1 - [D4A062_RAT]	2.03598	1.84	1	1	1	1	3.17759e+06	979	109.167	7.47412
Q99PD4	Actin-related protein 2/3 complex subunit 1A OS=Rattus norvegicus GN=Arpc1a PE=2 SV=1 - [ARC1A_RAT]	2.03558	2.7	1	1	1	1	2.8695e+06	370	41.5727	8.17725
P11348	Dihydropteridine reductase OS=Rattus norvegicus GN=Qdpr PE=1 SV=1 - [DHPR_RAT]	2.03408	7.47	1	2	2	2	1.9236e+06	241	25.5359	7.81104
Q3B7U1	Melanoma antigen, family D, 2 OS=Rattus norvegicus GN=Maged2 PE=2 SV=1 - [Q3B7U1_RAT]	2.03173	1.94	3	1	1	1		618	65.7135	9.14404
E9PSL8	Protein Kif6 OS=Rattus norvegicus GN=Kif6 PE=3 SV=2 - [E9PSL8_RAT]	2.02649	1.63	1	1	1	1		798	90.0135	7.29834
D3ZAZ0	Protein Eif3m OS=Rattus norvegicus GN=Eif3m PE=4 SV=1 - [D3ZAZ0_RAT]	2.02236	2.67	1	1	1	1	2.10132e+06	374	42.4899	5.74463
F1LNM0	Disks large homolog 1 OS=Rattus norvegicus GN=Dlg1 PE=2 SV=1 - [F1LNM0_RAT]	2.01718	1.32	2	1	1	1	356754	911	100.546	5.94775
Q6AYP7	7-methylguanosine phosphate-specific 5'-nucleotidase OS=Rattus norvegicus GN=Nt5c3b PE=2 SV=2 - [5NT3B_RAT]	2.01516	3	1	1	1	1	794485	300	34.5134	6.45557
D4ABY4	Uncharacterized protein OS=Rattus norvegicus GN=Ube2j1 PE=2 SV=2 - [D4ABY4_RAT]	2.01316	5.2	1	1	1	1	147234	250	27.9782	7.81104
D3ZW89	Calcium binding protein 5 (Predicted), isoform CRA_b OS=Rattus norvegicus GN=Cabp5 PE=4 SV=1 - [D3ZW89_RAT]	2.01236	10.98	1	1	1	1		173	19.7446	4.50049
D4A7L4	NADH dehydrogenase (Ubiquinone) 1 beta subcomplex, 11 (Predicted) OS=Rattus norvegicus GN=Ndufb11 PE=4 SV=1 - [D4A7L4_RAT]	2.01186	6.62	1	1	1	1	1.65166e+06	151	17.6229	5.23682
D4A367	RanBP-type and C3HC4-type zinc finger-containing protein 1 OS=Rattus norvegicus GN=Rbck1 PE=2 SV=1 - [D4A367_RAT]	2.01037	4.44	2	1	1	1	644637	270	30.2292	6.31592
Q5RJL6	Meteorin-like protein OS=Rattus norvegicus GN=Metrnl PE=2 SV=1 - [METRL_RAT]	2.0076	2.57	1	1	1	2	7.82005e+06	311	34.4464	7.86963
B1H2A2	Fsd1 protein OS=Rattus norvegicus GN=Fsd1 PE=2 SV=1 - [B1H2A2_RAT]	2.00686	2.02	1	1	1	1	198424	496	55.592	7.28369
F1M7H7	Membrane-associated guanylate kinase, WW and PDZ domain-containing protein 1 (Fragment) OS=Rattus norvegicus GN=Magi1 PE=4 SV=2 - [F1M7H7_RAT]	2.00429	1.87	4	1	1	1		1015	110.351	5.60498
Q6AY79	Protein FAM203A OS=Rattus norvegicus GN=Fam203a PE=2 SV=1 - [F203A_RAT]	2.00109	2.04	1	1	1	1	470347	393	43.1044	4.83057
F1MAD9	Structural maintenance of chromosomes protein OS=Rattus norvegicus GN=Smc4 PE=3 SV=1 - [F1MAD9_RAT]	2.00082	0.7	1	1	1	1	531435	1286	146.714	6.96143
M0R9S6	Uncharacterized protein OS=Rattus norvegicus PE=4 SV=1 - [M0R9S6_RAT]	2.00033	9.04	1	1	1	2		177	19.6606	8.36768
D3ZHG2	Kinesin light chain 1 OS=Rattus norvegicus GN=Klc1 PE=2 SV=2 - [D3ZHG2_RAT]	1.99981	1.85	5	1	1	1	826723	542	61.6282	5.8335
B1WC40	Nuclear cap-binding protein subunit 2 OS=Rattus norvegicus GN=Ncbp2 PE=2 SV=1 - [NCBP2_RAT]	1.99936	7.05	1	1	1	1	430218	156	18.0058	7.81104
Q5PQJ6	Pyrroline-5-carboxylate reductase 3 OS=Rattus norvegicus GN=Pycrl PE=2 SV=1 - [P5CR3_RAT]	1.99804	3.65	1	1	1	1	915028	274	28.8598	7.06396
F1LVB0	Uncharacterized protein (Fragment) OS=Rattus norvegicus PE=3 SV=1 - [F1LVB0_RAT]	1.99454	3.7	1	1	1	1	888074	432	49.5134	6.62451
F1LYA6	Protein Abi2 OS=Rattus norvegicus GN=Abi2 PE=2 SV=2 - [F1LYA6_RAT]	1.99254	2.06	2	1	1	1	220292	534	59.2911	9.33447
F1LYL8	Ribosomal protein S6 kinase OS=Rattus norvegicus GN=Rps6ka6 PE=2 SV=2 - [F1LYL8_RAT]	1.98712	1.74	1	1	2	2	596301	860	97.3144	7.23975
Q9JMB5	Proteasomal ubiquitin receptor ADRM1 OS=Rattus norvegicus GN=Adrm1 PE=2 SV=2 - [ADRM1_RAT]	1.97976	5.41	1	2	2	2	444778	407	42.0758	5.07178
D3ZXF8	Mitochondrial ribosomal protein L43 (Predicted), isoform CRA_a OS=Rattus norvegicus GN=Mrpl43 PE=4 SV=2 - [D3ZXF8_RAT]	1.97524	5.98	1	1	1	1	818137	117	13.1588	10.9604
Q9Z2G8	Nucleosome assembly protein 1-like 1 OS=Rattus norvegicus GN=Nap1l1 PE=2 SV=1 - [NP1L1_RAT]	1.97453	2.82	3	1	1	1	381007	390	45.2849	4.50049
Q5XIU4	B-cell receptor-associated protein 29 OS=Rattus norvegicus GN=Bcap29 PE=2 SV=1 - [Q5XIU4_RAT]	1.97418	3.73	1	1	1	1	3.34352e+06	241	28.2163	9.65674
F1M6D0	Protein LOC100360017 OS=Rattus norvegicus GN=LOC100360017 PE=4 SV=2 - [F1M6D0_RAT]	1.97143	14.4	1	2	2	2	1.62083e+06	125	14.3326	9.49561
D3ZAA0	PRA1 domain family 2 (Predicted) OS=Rattus norvegicus GN=Praf2 PE=4 SV=2 - [D3ZAA0_RAT]	1.97002	6.18	1	1	1	1	1.12114e+06	178	19.4217	9.39307
P26453-2	Isoform 2 of Basigin OS=Rattus norvegicus GN=Bsg - [BASI_RAT]	1.96475	2.94	2	1	1	1	1.0301e+06	272	29.567	5.2749
Q4V884	CDC16 cell division cycle 16 homolog (S. cerevisiae) OS=Rattus norvegicus GN=Cdc16 PE=2 SV=1 - [Q4V884_RAT]	1.96205	1.29	1	1	1	1	2.79361e+06	620	71.3153	5.70654
D3ZZU4	Protein Tmem160 OS=Rattus norvegicus GN=Tmem160 PE=4 SV=1 - [D3ZZU4_RAT]	1.95651	6.91	1	1	1	1	1.11042e+06	188	19.575	7.29834
O35910	Monocarboxylate transporter 4 OS=Rattus norvegicus GN=Slc16a3 PE=2 SV=1 - [MOT4_RAT]	1.95419	1.7	1	1	1	1	105420	471	50.5154	8.104
Q63528	Replication protein A 32 kDa subunit OS=Rattus norvegicus GN=Rpa2 PE=2 SV=2 - [RFA2_RAT]	1.95189	2.96	1	1	1	1	3.73082e+06	270	29.3275	5.75732
Q99J82	Integrin-linked protein kinase OS=Rattus norvegicus GN=Ilk PE=2 SV=1 - [ILK_RAT]	1.94985	1.77	1	1	1	1	593673	452	51.3399	8.07471
D4A068	Protein Pnma2 OS=Rattus norvegicus GN=Pnma2 PE=4 SV=1 - [D4A068_RAT]	1.94921	1.92	1	1	1	1	1.14472e+06	364	41.2222	5.2876
P36972	Adenine phosphoribosyltransferase OS=Rattus norvegicus GN=Aprt PE=1 SV=1 - [APT_RAT]	1.94486	5.56	1	1	1	1	1.78554e+06	180	19.5334	6.56592
B2RZ66	Protein Srp19 OS=Rattus norvegicus GN=Srp19 PE=2 SV=1 - [B2RZ66_RAT]	1.94435	10.42	1	1	1	1	312030	144	16.1274	9.84717
F1LY19	Protein LOC684558 OS=Rattus norvegicus GN=LOC684558 PE=4 SV=2 - [F1LY19_RAT]	1.94416	0.89	1	1	1	1	469037	1124	123.875	6.60986
Q5FVN2	Transmembrane protein 41B OS=Rattus norvegicus GN=Tmem41b PE=2 SV=1 - [TM41B_RAT]	1.94157	8.25	1	2	2	3	48324.2	291	32.4903	9.34912
P11608	ATP synthase protein 8 OS=Rattus norvegicus GN=Mt-atp8 PE=1 SV=1 - [ATP8_RAT]	1.93883	19.4	3	1	1	1	694049	67	7.63698	9.31982
P62864	40S ribosomal protein S30 OS=Rattus norvegicus GN=Fau PE=1 SV=1 - [RS30_RAT]	1.93844	16.95	2	1	1	1	1.8249e+06	59	6.64382	12.147
Q794E4	Heterogeneous nuclear ribonucleoprotein F OS=Rattus norvegicus GN=Hnrnpf PE=1 SV=3 - [HNRPF_RAT]	1.93835	2.41	4	1	1	2	660451	415	45.7009	5.49072
D4AAC7	Protein Ipo11 OS=Rattus norvegicus GN=Ipo11 PE=4 SV=2 - [D4AAC7_RAT]	1.93721	1.27	3	1	1	2	1.12813e+06	707	81.8785	6.11279
Q9WVK3	Peroxisomal trans-2-enoyl-CoA reductase OS=Rattus norvegicus GN=Pecr PE=2 SV=1 - [PECR_RAT]	1.93497	2.97	1	1	1	1		303	32.4126	8.68994
D3Z9E1	Elastin microfibril interfacer 1 (Predicted), isoform CRA_b OS=Rattus norvegicus GN=Emilin1 PE=4 SV=1 - [D3Z9E1_RAT]	1.9335	1.44	1	1	1	1		900	94.4468	4.98291
A7VJC2-3	Isoform B0a of Heterogeneous nuclear ribonucleoproteins A2/B1 OS=Rattus norvegicus GN=Hnrnpa2b1 - [ROA2_RAT]	1.93264	7.31	9	1	2	3	1.82717e+06	301	32.5155	8.71924
D3ZZR9	Peptidyl-prolyl cis-trans isomerase OS=Rattus norvegicus GN=Fkbp2 PE=4 SV=1 - [D3ZZR9_RAT]	1.93237	8.57	1	1	1	2	3.16624e+06	140	15.3782	8.88037
Q923I5	PAK-interacting exchange factor beta2-PIX OS=Rattus norvegicus GN=Arhgef7 PE=2 SV=1 - [Q923I5_RAT]	1.93197	1.6	4	1	1	1	235499	625	70.2731	7.12256
P12075	Cytochrome c oxidase subunit 5B, mitochondrial OS=Rattus norvegicus GN=Cox5b PE=1 SV=2 - [COX5B_RAT]	1.92608	9.3	1	1	1	1	757580	129	13.9059	7.78174
Q6AXN6	Small kinetochore-associated protein OS=Rattus norvegicus GN=Knstrn PE=2 SV=1 - [SKAP_RAT]	1.92298	2.88	1	1	1	1	379349	312	34.8636	5.43994
Q5XI41	Translocating chain-associated membrane protein 1 OS=Rattus norvegicus GN=Tram1 PE=2 SV=3 - [TRAM1_RAT]	1.91808	1.87	2	1	1	1	1.08956e+06	374	43.0027	9.67139
F7DLY1	EPS8-like 2 (Predicted), isoform CRA_d OS=Rattus norvegicus GN=Eps8l2 PE=4 SV=1 - [F7DLY1_RAT]	1.91517	1.75	2	1	1	1	748144	684	77.452	6.90283
D4ACF4	Neural retina leucine zipper gene (Predicted) OS=Rattus norvegicus GN=Nrl PE=4 SV=1 - [D4ACF4_RAT]	1.91264	3.78	1	1	1	1	3.08368e+06	238	26.0862	7.34229
Q6MG10	Mitochondrial ribosomal protein S18B OS=Rattus norvegicus GN=Mrps18b PE=2 SV=1 - [Q6MG10_RAT]	1.90998	3.95	2	1	1	1	424385	253	28.6635	8.90967
Q6IN03	Rab28 protein OS=Rattus norvegicus GN=Rab28 PE=2 SV=1 - [Q6IN03_RAT]	1.90684	4.09	2	1	1	1	491443	220	24.7055	5.46533
Q9JMI1	Acetoacetyl-CoA synthetase OS=Rattus norvegicus GN=Aacs PE=1 SV=1 - [AACS_RAT]	1.90448	1.64	1	1	1	1	197424	672	74.9919	6.49365
P62859	40S ribosomal protein S28 OS=Rattus norvegicus GN=Rps28 PE=1 SV=1 - [RS28_RAT]	1.90284	17.39	1	1	1	1	1.03635e+06	69	7.8362	10.6968
F1M6U0	Protein Wwc1 OS=Rattus norvegicus GN=Wwc1 PE=4 SV=2 - [F1M6U0_RAT]	1.89313	1.09	1	1	1	1	1.87504e+06	1104	123.898	5.8335
Q99PF3	APEX (Fragment) OS=Rattus norvegicus GN=Apex1 PE=2 SV=1 - [Q99PF3_RAT]	1.89259	6.92	2	2	2	3	652820	289	32.3325	8.57275
Q9QZI3	Robo2 (Fragment) OS=Rattus norvegicus GN=Robo2 PE=2 SV=1 - [Q9QZI3_RAT]	1.89093	0.94	2	1	1	1	2.38768e+06	1060	116.719	8.38232
D3ZWA8	Protein Appl1 (Fragment) OS=Rattus norvegicus GN=Appl1 PE=4 SV=2 - [D3ZWA8_RAT]	1.89025	1.45	1	1	1	1	522984	690	77.4495	5.5542
B5DFC8	Eukaryotic translation initiation factor 3 subunit C OS=Rattus norvegicus GN=Eif3c PE=2 SV=1 - [EIF3C_RAT]	1.88674	2.09	1	2	2	2	629463	911	105.369	5.78271
G3V640	Mitochondrial import inner membrane translocase subunit TIM44 OS=Rattus norvegicus GN=Timm44 PE=4 SV=1 - [G3V640_RAT]	1.88024	2.21	2	1	1	1	408367	453	51.0284	8.30908
Q5I034	Uncharacterized protein C12orf43 homolog OS=Rattus norvegicus PE=2 SV=1 - [CL043_RAT]	1.87793	5.42	1	1	1	1	312553	277	30.0382	7.66455
Q3KR55	Protein LOC687575 OS=Rattus norvegicus GN=LOC687575 PE=2 SV=1 - [Q3KR55_RAT]	1.87019	5.44	1	1	1	1	63303.2	239	27.7974	8.80713
Q5XI97	Alanyl-tRNA editing protein Aarsd1 OS=Rattus norvegicus GN=Aarsd1 PE=2 SV=1 - [AASD1_RAT]	1.86902	2.43	1	1	1	1	388657	412	45.0652	6.48096
Q5FWY5	AH receptor-interacting protein OS=Rattus norvegicus GN=Aip PE=1 SV=1 - [AIP_RAT]	1.8638	3.64	1	1	1	1	539480	330	37.5752	6.53662
P38652	Phosphoglucomutase-1 OS=Rattus norvegicus GN=Pgm1 PE=1 SV=2 - [PGM1_RAT]	1.86033	2.14	3	1	1	1	4.03691e+06	562	61.3646	6.75635
F2YRM8	EAAT5 variant OS=Rattus norvegicus PE=2 SV=1 - [F2YRM8_RAT]	1.85826	2.25	1	1	1	1		400	43.241	9.01221
Q5I0G4	Glycine--tRNA ligase (Fragment) OS=Rattus norvegicus GN=Gars PE=1 SV=1 - [SYG_RAT]	1.8576	1.57	2	1	1	1	634479	637	71.9843	6.07471
D3ZKB6	Uncharacterized protein OS=Rattus norvegicus GN=RGD1562948 PE=3 SV=2 - [D3ZKB6_RAT]	1.85697	1.76	4	1	1	1	2.50207e+06	341	35.7992	7.04932
P61480	Ribosome biogenesis protein WDR12 OS=Rattus norvegicus GN=Wdr12 PE=2 SV=1 - [WDR12_RAT]	1.85629	2.36	1	1	1	2	282649	423	47.5328	5.89697
B2RYL7	Dis3 protein OS=Rattus norvegicus GN=Dis3 PE=2 SV=1 - [B2RYL7_RAT]	1.85525	1.15	1	1	1	1	522771	957	108.686	7.13721
F1LPB0	Sphingosine-1-phosphate phosphatase 1 OS=Rattus norvegicus GN=Sgpp1 PE=2 SV=1 - [F1LPB0_RAT]	1.84762	3.03	2	1	1	1	287265	429	47.5921	8.77783
Q6TXI8	LRRGT00011 OS=Rattus norvegicus GN=Phf14 PE=2 SV=1 - [Q6TXI8_RAT]	1.84707	1.77	3	1	1	1	631827	566	62.5739	4.69092
D3ZHG0	Protein Ptplb OS=Rattus norvegicus GN=Ptplb PE=4 SV=2 - [D3ZHG0_RAT]	1.84602	4.72	1	1	1	1	1.36261e+06	254	28.3481	9.5542
D3ZBJ7	Uncharacterized protein OS=Rattus norvegicus PE=4 SV=1 - [D3ZBJ7_RAT]	1.84549	2.44	2	1	1	1	3.0857e+06	328	37.6009	5.2749
D3ZGY1	Protein Wibg OS=Rattus norvegicus GN=Wibg PE=4 SV=1 - [D3ZGY1_RAT]	1.84394	3.94	1	1	1	1	267561	203	22.713	9.64209
P25809	Creatine kinase U-type, mitochondrial OS=Rattus norvegicus GN=Ckmt1 PE=1 SV=1 - [KCRU_RAT]	1.84337	3.83	2	2	2	3	1.16578e+06	418	46.9993	8.48486
Q99JD4	CLIP-associating protein 2 OS=Rattus norvegicus GN=Clasp2 PE=2 SV=1 - [CLAP2_RAT]	1.84075	0.78	1	1	1	1	377171	1286	140.551	8.57275
M0R5N3	Uncharacterized protein (Fragment) OS=Rattus norvegicus PE=4 SV=1 - [M0R5N3_RAT]	1.83637	16.8	3	4	4	4	2.26352e+06	250	28.1163	7.89893
B2DD29	Serine/threonine-protein kinase BRSK1 OS=Rattus norvegicus GN=Brsk1 PE=1 SV=1 - [BRSK1_RAT]	1.83543	1.03	1	1	1	2	1.69351e+06	778	85.1298	9.31982
Q6P6R6	Transglutaminase 2, C polypeptide OS=Rattus norvegicus GN=Tgm2 PE=2 SV=1 - [Q6P6R6_RAT]	1.83418	1.46	2	1	1	1	3.67309e+06	686	76.8871	5.07178
Q3B8Q3	Putative sodium-coupled neutral amino acid transporter 9 OS=Rattus norvegicus GN=Slc38a9 PE=2 SV=1 - [S38A9_RAT]	1.82045	1.79	1	1	1	1	1.46791e+07	559	63.3766	7.50342
F1LVX2	Protein Ehbp1 OS=Rattus norvegicus GN=Ehbp1 PE=2 SV=2 - [F1LVX2_RAT]	1.8203	0.65	1	1	1	1	448735	1227	138.625	5.35107
Q6P7Q4	Lactoylglutathione lyase OS=Rattus norvegicus GN=Glo1 PE=1 SV=3 - [LGUL_RAT]	1.8193	4.89	1	1	1	1	701310	184	20.8063	5.31299
Q6AYD6	PDZ and LIM domain protein 2 OS=Rattus norvegicus GN=Pdlim2 PE=1 SV=1 - [PDLI2_RAT]	1.8171	3.15	1	1	1	1	1.30127e+07	349	37.5567	8.646
Q5FVM4	Non-POU domain-containing octamer-binding protein OS=Rattus norvegicus GN=Nono PE=2 SV=3 - [NONO_RAT]	1.81666	1.68	1	1	1	1	1.25705e+06	476	54.8906	8.95361
Q32PZ3	Protein unc-45 homolog A OS=Rattus norvegicus GN=Unc45a PE=2 SV=1 - [UN45A_RAT]	1.81362	0.95	1	1	1	1	639826	944	103.176	6.18896
F1LW16	Protein Btaf1 OS=Rattus norvegicus GN=Btaf1 PE=4 SV=2 - [F1LW16_RAT]	1.80995	0.43	1	1	1	1	213149	1855	207.589	6.41748
A1A5R8	Uncharacterized protein KIAA1841 homolog OS=Rattus norvegicus PE=2 SV=1 - [K1841_RAT]	1.80636	1.63	1	1	1	1		737	84.2908	6.53662
P19132	Ferritin heavy chain OS=Rattus norvegicus GN=Fth1 PE=1 SV=3 - [FRIH_RAT]	1.80538	3.85	7	1	1	1	2.58702e+06	182	21.1133	6.30322
D3ZGR7	Protein LOC100910447 OS=Rattus norvegicus GN=RGD1564093 PE=4 SV=1 - [D3ZGR7_RAT]	1.80467	5.2	1	1	1	1	466269	173	18.4613	9.67139
D4A7R0	Protein LOC100910272 OS=Rattus norvegicus GN=LOC100910272 PE=2 SV=2 - [D4A7R0_RAT]	1.80407	1.64	1	1	1	1	192767	670	74.6058	9.17334
B2GV01	Metastasis-associated gene family, member 2 OS=Rattus norvegicus GN=Mta2 PE=2 SV=1 - [B2GV01_RAT]	1.80088	1.5	1	1	1	1	933047	668	74.9126	9.67139
F1LNC3	PH domain leucine-rich repeat protein phosphatase 1 OS=Rattus norvegicus GN=Phlpp1 PE=2 SV=2 - [F1LNC3_RAT]	1.80066	0.47	2	1	1	1	1.33282e+06	1696	183.411	6.34131
D3ZVI9	Parkinson disease 7 domain containing 1 (Predicted), isoform CRA_a OS=Rattus norvegicus GN=LOC100911365 PE=4 SV=1 - [D3ZVI9_RAT]	1.79868	4.55	1	1	1	1	118828	220	23.2487	6.84424
F1LSG3	Protein Fbf1 (Fragment) OS=Rattus norvegicus GN=Fbf1 PE=2 SV=2 - [F1LSG3_RAT]	1.79655	0.79	1	1	1	1		1146	127.363	6.17627
Q7TMZ5	ADP-ribosylation factor-like 6 interacting protein 1 OS=Rattus norvegicus GN=Arl6ip1 PE=2 SV=1 - [Q7TMZ5_RAT]	1.79441	4.93	1	1	1	1	989620	203	23.4355	9.31982
F8WLE0	Kinesin-like protein KLP6 OS=Rattus norvegicus GN=Klp6 PE=2 SV=1 - [KLP6_RAT]	1.79418	0.87	1	1	1	1		1034	115.469	6.65381
A7XYB9	NADH-ubiquinone oxidoreductase chain 4 OS=Rattus norvegicus GN=Mt-nd4 PE=3 SV=1 - [A7XYB9_RAT]	1.79142	2.18	9	1	1	1	871511	459	51.7375	9.40771
F1LTF8	Protein Lama4 OS=Rattus norvegicus GN=Lama4 PE=4 SV=2 - [F1LTF8_RAT]	1.78696	0.45	1	1	1	1	1.36681e+06	1761	195.502	6.52197
Q5I0E3	Uncharacterized protein C7orf50 homolog OS=Rattus norvegicus PE=2 SV=1 - [CG050_RAT]	1.7851	5.7	1	1	1	2	447005	193	22.1129	9.78857
Q9JLJ3	4-trimethylaminobutyraldehyde dehydrogenase OS=Rattus norvegicus GN=Aldh9a1 PE=1 SV=1 - [AL9A1_RAT]	1.78109	2.02	1	1	1	1	1.13101e+06	494	53.618	6.91748
M0RB18	Protein Vwa8 (Fragment) OS=Rattus norvegicus GN=Vwa8 PE=4 SV=1 - [M0RB18_RAT]	1.77953	2.45	2	1	1	1	97062.8	408	46.126	7.84033
Q5FVJ0	Protein RUFY3 OS=Rattus norvegicus GN=Rufy3 PE=1 SV=1 - [RUFY3_RAT]	1.77823	2.35	2	1	1	1	143760	469	52.8732	5.49072
P86410	Ral GTPase-activating protein subunit beta OS=Rattus norvegicus GN=Ralgapb PE=1 SV=1 - [RLGPB_RAT]	1.77656	0.74	1	1	1	1	284556	1484	165.262	6.78564
P38718-2	Isoform Short of Mitochondrial pyruvate carrier 2 OS=Rattus norvegicus GN=Mpc2 - [MPC2_RAT]	1.77584	12.93	2	2	2	2	1.24202e+06	116	12.9599	10.77
G3V9Z4	Putative L-aspartate dehydrogenase OS=Rattus norvegicus GN=Aspdh PE=4 SV=1 - [G3V9Z4_RAT]	1.77532	3.83	2	1	1	1		287	30.3697	6.84424
P97690	Structural maintenance of chromosomes protein 3 OS=Rattus norvegicus GN=Smc3 PE=1 SV=1 - [SMC3_RAT]	1.77459	1.01	3	1	1	1	483673	1191	138.362	7.85498
G3V8A3	Dual oxidase 2 OS=Rattus norvegicus GN=Duox2 PE=4 SV=1 - [G3V8A3_RAT]	1.77205	0.66	2	1	1	1	404689	1517	171.479	7.56201
I6L9G6	Protein Tardbp OS=Rattus norvegicus GN=Tardbp PE=2 SV=1 - [I6L9G6_RAT]	1.77203	5.96	1	2	2	2	760893	285	32.1271	6.99072
O54922	Exocyst complex component 7 OS=Rattus norvegicus GN=Exoc7 PE=2 SV=1 - [EXOC7_RAT]	1.77038	2.6	1	2	2	2	300377	653	74.9988	6.7124
P22355	Pulmonary surfactant-associated protein B OS=Rattus norvegicus GN=Sftpb PE=2 SV=1 - [PSPB_RAT]	1.76816	3.19	2	1	1	1		376	41.5623	6.62451
D3ZAL8	Leucine-rich repeat transmembrane neuronal protein 3 OS=Rattus norvegicus GN=Lrrtm3 PE=3 SV=1 - [LRRT3_RAT]	1.76537	0.86	1	1	1	2	1.46648e+07	582	65.9882	9.18799
Q8CG07	ATPase WRNIP1 OS=Rattus norvegicus GN=Wrnip1 PE=2 SV=1 - [WRIP1_RAT]	1.76208	1.82	1	1	1	1		660	71.8889	6.17627
Q925D6	Mitogen-activated protein kinase kinase 6 OS=Rattus norvegicus GN=Map2k6 PE=2 SV=1 - [Q925D6_RAT]	1.75696	4.79	2	2	2	3	674096	334	37.4202	7.38623
P55926-2	Isoform 2 of Acid-sensing ion channel 1 OS=Rattus norvegicus GN=Asic1 - [ASIC1_RAT]	1.75403	2.35	3	1	1	1	2.3625e+06	425	47.5318	5.021
P46462	Transitional endoplasmic reticulum ATPase OS=Rattus norvegicus GN=Vcp PE=1 SV=3 - [TERA_RAT]	1.74441	1.49	1	1	1	1	199917	806	89.2927	5.26221
Q400C7-2	Isoform 2 of Archaemetzincin-2 OS=Rattus norvegicus GN=Amz2 - [AMZ2_RAT]	1.74142	3.07	2	1	1	1	618638	358	41.2249	7.82568
Q64573	Liver carboxylesterase 4 OS=Rattus norvegicus PE=2 SV=2 - [EST4_RAT]	1.73893	1.43	1	1	1	1		561	62.2687	6.75635
P11951	Cytochrome c oxidase subunit 6C-2 OS=Rattus norvegicus GN=Cox6c2 PE=1 SV=3 - [CX6C2_RAT]	1.73571	18.42	1	2	2	2	2.55458e+06	76	8.44945	10.0669
Q8R3Z7	EH-domain containing 4 OS=Rattus norvegicus GN=Ehd4 PE=2 SV=1 - [Q8R3Z7_RAT]	1.73565	1.48	1	1	1	1	802095	541	61.4285	6.75635
D4A3V5	Protein Cgnl1 OS=Rattus norvegicus GN=Cgnl1 PE=4 SV=1 - [D4A3V5_RAT]	1.72991	0.77	1	1	1	1	184548	1292	147.849	5.5542
P85972	Vinculin OS=Rattus norvegicus GN=Vcl PE=1 SV=1 - [VINC_RAT]	1.72744	0.84	1	1	1	1		1066	116.542	6.0874
Q5HZE4	Methylthioribose-1-phosphate isomerase OS=Rattus norvegicus GN=Mri1 PE=2 SV=1 - [MTNA_RAT]	1.72623	5.42	1	2	2	2	1282226	369	39.5625	6.04932
D3ZWF5	Protein Eny2 OS=Rattus norvegicus GN=Eny2 PE=4 SV=1 - [D3ZWF5_RAT]	1.72495	8.91	1	1	1	1	2.4635e+06	101	11.5213	9.33447
D3ZSC2	Protein Pdcd2l OS=Rattus norvegicus GN=Pdcd2l PE=4 SV=1 - [D3ZSC2_RAT]	1.72313	2.5	1	1	1	1	426388	360	39.7071	4.89404
D3Z9I4	Protein Gins3 OS=Rattus norvegicus GN=Gins3 PE=4 SV=1 - [D3Z9I4_RAT]	1.72286	3.7	1	1	1	1	99301.7	216	24.4223	5.31299
B2RYN1	Fructosamine-3-kinase-related protein OS=Rattus norvegicus GN=Fn3krp PE=2 SV=1 - [B2RYN1_RAT]	1.71758	2.91	1	1	1	2	3.51754e+06	309	34.1471	7.88428
Q5K547	B cell lymphoma like X (Fragment) OS=Rattus norvegicus GN=Bcl2l1 PE=2 SV=1 - [Q5K547_RAT]	1.71758	14.49	7	1	1	1	158391	69	7.7116	4.42432
D3ZUJ5	Deoxythymidylate kinase (Predicted), isoform CRA_b OS=Rattus norvegicus GN=Dtymk PE=3 SV=1 - [D3ZUJ5_RAT]	1.71688	4.72	1	1	1	1		212	23.9585	5.93506
D3ZU83	ERGIC and golgi 3 (Predicted) OS=Rattus norvegicus GN=Ergic3 PE=4 SV=1 - [D3ZU83_RAT]	1.7165	2.09	1	1	1	1	1.12108e+06	383	43.1956	6.37939
F1LQQ1	Malic enzyme (Fragment) OS=Rattus norvegicus GN=Me1 PE=2 SV=2 - [F1LQQ1_RAT]	1.71461	1.64	2	1	1	2		549	61.0735	5.92236
D3ZQ57	Plexin B2 OS=Rattus norvegicus GN=Plxnb2 PE=4 SV=1 - [D3ZQ57_RAT]	1.71413	0.49	1	1	1	1	283879	1841	205.818	5.98584
F1LQS9	Rho guanine nucleotide exchange factor 11 OS=Rattus norvegicus GN=Arhgef11 PE=2 SV=2 - [F1LQS9_RAT]	1.71379	0.79	2	1	1	1		1526	168.416	5.93506
D3ZAS8	Protein Sart3 OS=Rattus norvegicus GN=Sart3 PE=4 SV=1 - [D3ZAS8_RAT]	1.71279	0.94	1	1	1	1	711251	960	109.355	5.42725
P60517	Gamma-aminobutyric acid receptor-associated protein OS=Rattus norvegicus GN=Gabarap PE=1 SV=1 - [GBRAP_RAT]	1.71277	5.98	4	1	1	1	2.44529e+06	117	13.9093	8.79248
P24049	60S ribosomal protein L17 OS=Rattus norvegicus GN=Rpl17 PE=2 SV=3 - [RL17_RAT]	1.71246	13.04	3	2	2	2		184	21.3834	10.1841
Q5U2X7	Mitochondrial import inner membrane translocase subunit Tim21 OS=Rattus norvegicus GN=Timm21 PE=2 SV=1 - [TIM21_RAT]	1.71031	3.27	1	1	1	1	661484	245	27.8587	9.99365
Q10743	Disintegrin and metalloproteinase domain-containing protein 10 (Fragment) OS=Rattus norvegicus GN=Adam10 PE=2 SV=1 - [ADA10_RAT]	1.71004	2.21	2	1	1	1		544	60.4052	8.04541
D3ZWS2	Protein LOC690000 OS=Rattus norvegicus GN=LOC690000 PE=4 SV=1 - [D3ZWS2_RAT]	1.70918	7.09	1	1	1	3		141	15.0598	7.12256
Q5XIJ6	BRISC and BRCA1-A complex member 1 OS=Rattus norvegicus GN=Babam1 PE=2 SV=1 - [BABA1_RAT]	1.70883	3.29	1	1	1	1	724224	334	36.8547	4.55127
Q63921	Prostaglandin G/H synthase 1 OS=Rattus norvegicus GN=Ptgs1 PE=2 SV=2 - [PGH1_RAT]	1.70227	1.33	2	1	1	1	1.32727e+06	602	68.9878	6.69775
M0RCX0	Protein Pcbd2 (Fragment) OS=Rattus norvegicus GN=Pcbd2 PE=4 SV=1 - [M0RCX0_RAT]	1.69967	5.51	1	1	1	1	1.36047e+06	127	14.1241	9.20264
P19024	Potassium voltage-gated channel subfamily A member 5 OS=Rattus norvegicus GN=Kcna5 PE=1 SV=1 - [KCNA5_RAT]	1.69914	1.99	1	1	1	1	287503	602	66.511	5.80811
Q6AYE7	Interferon-induced protein with tetratricopeptide repeats 3 OS=Rattus norvegicus GN=Ifit3 PE=2 SV=1 - [Q6AYE7_RAT]	1.69705	1.7	1	1	1	1	4.37161e+06	411	48.0246	5.56689
B1WC32	RCG53609 OS=Rattus norvegicus GN=Uba2 PE=2 SV=1 - [B1WC32_RAT]	1.69615	1.56	1	1	1	1	512097	639	70.7259	5.24951
A2RUW1	Toll-interacting protein OS=Rattus norvegicus GN=Tollip PE=2 SV=1 - [TOLIP_RAT]	1.69465	3.28	1	1	1	2	2.22282e+06	274	30.2949	5.17334
F1MA88	Protein Dock5 OS=Rattus norvegicus GN=Dock5 PE=2 SV=2 - [F1MA88_RAT]	1.69437	1.49	2	1	1	1		671	76.2063	7.02002
F1M9C1	Prolyl 3-hydroxylase 2 (Fragment) OS=Rattus norvegicus GN=Leprel1 PE=2 SV=2 - [F1M9C1_RAT]	1.693	1.28	2	1	1	1	1.62979e+06	547	62.2983	5.13525
Q9EPX0	Heat shock protein beta-8 OS=Rattus norvegicus GN=Hspb8 PE=1 SV=1 - [HSPB8_RAT]	1.69119	4.08	1	1	1	1	3.77101e+06	196	21.5787	5.021
D4ABV0	Protein RGD1566320 OS=Rattus norvegicus GN=RGD1566320 PE=4 SV=1 - [D4ABV0_RAT]	1.68888	10.28	1	1	1	1		107	12.1009	4.97021
Q499M5	Ankyrin repeat domain-containing protein 16 OS=Rattus norvegicus GN=Ankrd16 PE=2 SV=1 - [ANR16_RAT]	1.68718	2.97	1	1	1	1		370	40.5343	6.62451
P0C1S9	Sn1-specific diacylglycerol lipase beta OS=Rattus norvegicus GN=Daglb PE=1 SV=1 - [DGLB_RAT]	1.67729	1.5	2	1	1	1	3.03317e+06	668	73.7235	6.66846
M0R4W7	Uncharacterized protein (Fragment) OS=Rattus norvegicus PE=4 SV=1 - [M0R4W7_RAT]	1.67517	1.23	2	1	1	1	1.56426e+06	489	56.5375	8.14795
F1LXA0	NADH dehydrogenase (Ubiquinone) 1 alpha subcomplex, 12 (Predicted), isoform CRA_b OS=Rattus norvegicus GN=Ndufa12 PE=4 SV=2 - [F1LXA0_RAT]	1.67506	14.48	1	2	2	2	103580188	145	17.1667	9.70068
Q3KRD5	Mitochondrial import receptor subunit TOM34 OS=Rattus norvegicus GN=Tomm34 PE=2 SV=1 - [TOM34_RAT]	1.67251	2.91	1	1	1	1	4.84247e+06	309	34.4399	9.12939
D3ZFN9	Protein Kif16b OS=Rattus norvegicus GN=Kif16b PE=2 SV=1 - [D3ZFN9_RAT]	1.67162	0.61	1	1	1	2	297659	1311	149.953	6.48096
P05964	Protein S100-A6 OS=Rattus norvegicus GN=S100a6 PE=1 SV=3 - [S10A6_RAT]	1.67136	16.85	1	2	2	4	1.76619e+07	89	10.0283	5.47803
D4A0Y6	Uncharacterized protein OS=Rattus norvegicus GN=Mki67 PE=4 SV=1 - [D4A0Y6_RAT]	1.67049	0.35	1	1	1	1	846922	3164	348.243	9.74463
Q4KLK9	RNA polymerase II subunit A C-terminal domain phosphatase SSU72 OS=Rattus norvegicus GN=Ssu72 PE=2 SV=1 - [SSU72_RAT]	1.66998	5.67	1	1	1	1		194	22.53	5.32568
Q5U216	ATP-dependent RNA helicase DDX39A OS=Rattus norvegicus GN=Ddx39a PE=2 SV=1 - [DX39A_RAT]	1.66945	1.87	2	1	1	1	623911	427	49.078	5.68115
O70425	Myogenin OS=Rattus norvegicus GN=Myog PE=2 SV=1 - [O70425_RAT]	1.66879	4.02	2	1	1	1	1.00363e+07	224	25.1275	6.01123
Q8K3P6	Calcium-binding mitochondrial carrier protein SCaMC-2 OS=Rattus norvegicus GN=Slc25a25 PE=1 SV=1 - [SCMC2_RAT]	1.66781	2.13	1	1	1	1	407750	469	52.6612	8.41162
F1LU48	Protein Ergic1 (Fragment) OS=Rattus norvegicus GN=Ergic1 PE=4 SV=1 - [F1LU48_RAT]	1.66692	3.46	1	1	1	2	2.84249e+06	289	32.3956	7.10791
F1LSH1	Protein Ell2 OS=Rattus norvegicus GN=Ell2 PE=2 SV=1 - [F1LSH1_RAT]	1.66635	1.09	1	1	1	1		640	72.2276	8.79248
P22002-4	Isoform 4 of Voltage-dependent L-type calcium channel subunit alpha-1C OS=Rattus norvegicus GN=Cacna1c - [CAC1C_RAT]	1.66633	0.51	12	1	1	1	7.64461e+06	2139	239.892	6.90283
D3ZC01	Protein Rbbp5 OS=Rattus norvegicus GN=Rbbp5 PE=4 SV=1 - [D3ZC01_RAT]	1.66138	2.23	1	1	1	1	330506	538	59.0126	5.12256
G3V709	Nicotinate phosphoribosyltransferase OS=Rattus norvegicus GN=Naprt1 PE=4 SV=1 - [G3V709_RAT]	1.66029	1.67	2	1	1	1	4.07618e+07	538	58.5667	6.354
B0BNA9	CCR4-NOT transcription complex subunit 11 OS=Rattus norvegicus GN=Cnot11 PE=2 SV=1 - [CNO11_RAT]	1.65959	2.38	1	1	1	1	305989	504	54.8012	6.55127
Q5I0H3	Small ubiquitin-related modifier 1 OS=Rattus norvegicus GN=Sumo1 PE=1 SV=1 - [SUMO1_RAT]	1.65775	11.88	1	1	1	1		101	11.5497	5.51611
P00406	Cytochrome c oxidase subunit 2 OS=Rattus norvegicus GN=Mtco2 PE=2 SV=2 - [COX2_RAT]	1.64715	4.41	3	1	1	1	875275	227	25.9251	4.729
B0BNN0	Tsta3 protein OS=Rattus norvegicus GN=Tsta3 PE=2 SV=1 - [B0BNN0_RAT]	1.64635	4.32	2	1	1	1	429709	278	30.9145	6.60986
O70288	Glutaminyl cyclase (Fragment) OS=Rattus norvegicus GN=Qpct PE=2 SV=1 - [O70288_RAT]	1.64375	2.93	1	1	1	1	1.00918e+06	239	27.1729	6.96143
Q5XI09	Gnl1 protein (Fragment) OS=Rattus norvegicus GN=Gnl1 PE=2 SV=1 - [Q5XI09_RAT]	1.64029	1.88	2	1	1	1	1.36915e+06	480	53.7377	5.05908
D3ZQI1	Glutathione peroxidase OS=Rattus norvegicus GN=Gpx7 PE=3 SV=1 - [D3ZQI1_RAT]	1.64022	3.76	1	1	1	1		186	21.0757	7.85498
F1LR38	ATP-binding cassette sub-family D member 3 (Fragment) OS=Rattus norvegicus GN=Abcd3 PE=2 SV=2 - [F1LR38_RAT]	1.63511	1.12	2	1	1	3	510595	625	71.5281	8.98291
D4A1J6	Protein Ankfy1 (Fragment) OS=Rattus norvegicus GN=Ankfy1 PE=4 SV=2 - [D4A1J6_RAT]	1.63413	1.54	1	2	2	2	294525	1169	128.581	5.97314
D4ACM2	MAD2 (Mitotic arrest deficient, homolog)-like 1 (Yeast) (Predicted), isoform CRA_a OS=Rattus norvegicus GN=Mad2l1 PE=4 SV=1 - [D4ACM2_RAT]	1.63114	4.88	1	1	1	2	1.6575e+06	205	23.5242	5.19873
P62744	AP-2 complex subunit sigma OS=Rattus norvegicus GN=Ap2s1 PE=2 SV=1 - [AP2S1_RAT]	1.62678	4.93	1	1	1	1	2.14097e+06	142	17.0067	6.17627
M0R6F2	Protein Acad10 OS=Rattus norvegicus GN=Acad10 PE=4 SV=1 - [M0R6F2_RAT]	1.62629	1.32	3	1	1	1	3.02438e+06	684	76.4387	8.5874
B0BNE2	DNA-directed RNA polymerases I, II, and III subunit RPABC1 OS=Rattus norvegicus GN=Polr2e PE=2 SV=1 - [RPAB1_RAT]	1.62624	8.57	1	1	2	2	591343	210	24.5547	5.94775
Q64559-1	Isoform 1 of Cytosolic acyl coenzyme A thioester hydrolase OS=Rattus norvegicus GN=Acot7 - [BACH_RAT]	1.62578	3.25	3	1	1	1	194119	338	37.5372	7.51807
Q9Z330-8	Isoform 8 of DNA (cytosine-5)-methyltransferase 1 OS=Rattus norvegicus GN=Dnmt1 - [DNMT1_RAT]	1.62444	0.68	12	1	1	1	227208	1333	150.385	7.18115
Q5I0H4	Transmembrane and coiled-coil domains protein 1 OS=Rattus norvegicus GN=Tmco1 PE=2 SV=1 - [TMCO1_RAT]	1.62437	4.26	1	1	1	2	1.62835e+06	188	21.1612	9.74463
Q62931	Golgi SNAP receptor complex member 1 OS=Rattus norvegicus GN=Gosr1 PE=1 SV=1 - [GOSR1_RAT]	1.62436	3.6	1	1	1	1	818316	250	28.5155	9.29053
G3V9X8	Magnesium transporter protein 1 OS=Rattus norvegicus GN=Magt1 PE=4 SV=2 - [G3V9X8_RAT]	1.62363	2.39	2	1	1	1	922884	335	37.9154	9.70068
D4A576	Protein Abcd4 OS=Rattus norvegicus GN=Abcd4 PE=3 SV=1 - [D4A576_RAT]	1.62254	1.32	1	1	1	1	100421	606	68.6416	6.69775
P30835	6-phosphofructokinase, liver type OS=Rattus norvegicus GN=Pfkl PE=2 SV=3 - [K6PL_RAT]	1.62199	1.15	5	1	1	1	171642	780	85.2844	7.40088
Q4KM77	Etoposide-induced protein 2.4 homolog OS=Rattus norvegicus GN=Ei24 PE=2 SV=1 - [EI24_RAT]	1.62088	4.71	1	2	2	2	1.10243e+06	340	38.8676	9.71533
E9PTQ3	Protein Adam28 OS=Rattus norvegicus GN=Adam28 PE=4 SV=1 - [E9PTQ3_RAT]	1.61963	0.84	2	1	1	2	8.6208e+06	718	80.7212	6.59521
F1LXE2	Protein LOC100912684 OS=Rattus norvegicus GN=Olr67 PE=3 SV=2 - [F1LXE2_RAT]	1.60589	2.24	2	1	1	1	731069	312	35.2569	8.95361
D3ZVT6	Ankyrin repeat and SOCS box-containing 7 (Predicted) OS=Rattus norvegicus GN=Asb7 PE=4 SV=1 - [D3ZVT6_RAT]	1.60444	7.23	2	1	2	2	1.02887e+06	318	35.9625	8.29443
Q5U204	Ragulator complex protein LAMTOR3 OS=Rattus norvegicus GN=Lamtor3 PE=2 SV=1 - [LTOR3_RAT]	1.60325	8.87	1	1	1	1	206198	124	13.5713	7.34229
B1WBU7	Protein Tmem50a OS=Rattus norvegicus GN=Tmem50a PE=2 SV=1 - [B1WBU7_RAT]	1.60148	5.73	1	1	1	1	1.74748e+06	157	17.3815	5.84619
Q6J2U6	RING finger protein 114 OS=Rattus norvegicus GN=Rnf114 PE=2 SV=1 - [RN114_RAT]	1.60136	3.49	1	1	1	1	656929	229	25.6473	6.81494
Q921A4	Cytoglobin OS=Rattus norvegicus GN=Cygb PE=1 SV=1 - [CYGB_RAT]	1.60034	4.74	1	1	1	1		190	21.483	6.80029
Q91ZF7	Alanine and arginine-rich domain-containing protein OS=Rattus norvegicus GN=Aard PE=2 SV=1 - [AARD_RAT]	0	6.06	1	1	1	1	303282	165	18.7656	10.8579
Q6AYY8	Acetyl-coenzyme A transporter 1 OS=Rattus norvegicus GN=Slc33a1 PE=2 SV=1 - [ACATN_RAT]	0	1.45	1	1	1	1	828759	550	61.062	8.00146
Q32PX2	Aminoacyl tRNA synthase complex-interacting multifunctional protein 2 OS=Rattus norvegicus GN=Aimp2 PE=2 SV=1 - [AIMP2_RAT]	0	6.25	1	1	1	3	1.95429e+06	320	35.4203	8.30908
Q91XT9	Neutral ceramidase OS=Rattus norvegicus GN=Asah2 PE=1 SV=1 - [ASAH2_RAT]	0	3.29	3	1	2	2		761	83.4352	7.00537
P49088	Asparagine synthetase [glutamine-hydrolyzing] OS=Rattus norvegicus GN=Asns PE=2 SV=3 - [ASNS_RAT]	0	1.43	1	1	1	1	1.18741e+06	561	64.2055	6.45557
P29418	ATP synthase subunit epsilon, mitochondrial OS=Rattus norvegicus GN=Atp5e PE=1 SV=2 - [ATP5E_RAT]	0	29.41	2	2	2	2	5.29115e+06	51	5.76311	10.0083
P70645	Bleomycin hydrolase OS=Rattus norvegicus GN=Blmh PE=1 SV=1 - [BLMH_RAT]	0	2.42	2	1	1	1	278760	454	52.2888	6.48096
Q63692	Hsp90 co-chaperone Cdc37 OS=Rattus norvegicus GN=Cdc37 PE=1 SV=2 - [CDC37_RAT]	0	1.85	1	1	1	1	954310	379	44.4819	5.33838
Q8CGS4	Charged multivesicular body protein 3 OS=Rattus norvegicus GN=Chmp3 PE=1 SV=3 - [CHMP3_RAT]	0	3.59	1	1	1	1	506196	223	25.0457	5.12256
Q9JLH6	CDK5 regulatory subunit-associated protein 1 OS=Rattus norvegicus GN=Cdk5rap1 PE=1 SV=1 - [CK5P1_RAT]	0	2.73	1	2	2	2	1.21192e+06	586	65.8248	8.42627
P37397	Calponin-3 OS=Rattus norvegicus GN=Cnn3 PE=1 SV=1 - [CNN3_RAT]	0	3.33	1	1	1	1	2.68393e+06	330	36.4118	5.71924
P19139	Casein kinase II subunit alpha OS=Rattus norvegicus GN=Csnk2a1 PE=1 SV=2 - [CSK21_RAT]	0	3.84	1	1	1	1	255885	391	45.0448	7.73779
Q9ERB4-3	Isoform Vint of Versican core protein OS=Rattus norvegicus GN=Vcan - [CSPG2_RAT]	0	0.74	3	1	1	1	93658.5	2712	296.684	4.55127
Q9EST9	Fibroblast growth factor 20 OS=Rattus norvegicus GN=Fgf20 PE=2 SV=1 - [FGF20_RAT]	0	7.55	1	1	1	1		212	23.5221	8.76318
Q9JLZ1	Glutaredoxin-3 OS=Rattus norvegicus GN=Glrx3 PE=1 SV=2 - [GLRX3_RAT]	0	5.34	2	2	2	2	781185	337	37.8254	5.71924
P31421	Metabotropic glutamate receptor 2 OS=Rattus norvegicus GN=Grm2 PE=1 SV=1 - [GRM2_RAT]	0	1.03	1	1	1	1		872	95.7123	7.79639
Q925G1-2	Isoform 2 of Hepatoma-derived growth factor-related protein 2 OS=Rattus norvegicus GN=Hdgfrp2 - [HDGR2_RAT]	0	1.65	2	1	1	1	48174.7	668	73.8872	7.88428
O08618	Phosphoribosyl pyrophosphate synthase-associated protein 2 OS=Rattus norvegicus GN=Prpsap2 PE=2 SV=1 - [KPRB_RAT]	0	2.44	1	1	1	1	293419	369	40.8403	7.1665
O08679	Serine/threonine-protein kinase MARK2 OS=Rattus norvegicus GN=Mark2 PE=1 SV=1 - [MARK2_RAT]	0	0.97	3	1	1	1	577670	722	80.8215	9.61279
Q5FVN0	Lysophospholipid acyltransferase 5 OS=Rattus norvegicus GN=Lpcat3 PE=2 SV=1 - [MBOA5_RAT]	0	1.85	1	1	1	1	1.33445e+06	487	55.9808	8.68994
Q9WVR8-2	Isoform 2 of Menin OS=Rattus norvegicus GN=Men1 - [MEN1_RAT]	0	1.98	2	1	1	1	93587	555	61.2495	6.62451
Q9ESN0	Protein Niban OS=Rattus norvegicus GN=Fam129a PE=2 SV=2 - [NIBAN_RAT]	0	2.45	1	1	1	1		937	103.401	4.70361
B5DFC9-2	Isoform 2 of Nidogen-2 OS=Rattus norvegicus GN=Nid2 - [NID2_RAT]	0	4.55	2	1	1	1		176	20.1101	6.68311
Q5XI78	2-oxoglutarate dehydrogenase, mitochondrial OS=Rattus norvegicus GN=Ogdh PE=1 SV=1 - [ODO1_RAT]	0	0.68	1	1	1	1	518836	1023	116.221	6.771
Q63433	Serine/threonine-protein kinase N1 OS=Rattus norvegicus GN=Pkn1 PE=1 SV=2 - [PKN1_RAT]	0	0.74	1	1	1	2	8.8108e+06	946	104.403	6.17627
Q99JE6	1-phosphatidylinositol 4,5-bisphosphate phosphodiesterase beta-3 OS=Rattus norvegicus GN=Plcb3 PE=1 SV=2 - [PLCB3_RAT]	0	0.89	32	1	2	4	2.53958e+06	1234	139.363	5.8335
P58195	Phospholipid scramblase 1 OS=Rattus norvegicus GN=Plscr1 PE=1 SV=1 - [PLS1_RAT]	0	2.99	2	1	1	1		335	36.6866	4.93213
Q5M821	Protein phosphatase 1H OS=Rattus norvegicus GN=Ppm1h PE=2 SV=2 - [PPM1H_RAT]	0	1.95	1	1	1	1		513	56.3447	6.72705
B2RYF1	Protein phosphatase 1 regulatory subunit 37 OS=Rattus norvegicus GN=Ppp1r37 PE=2 SV=1 - [PPR37_RAT]	0	1.55	1	1	1	1	1.0929e+06	710	76.8867	5.03369
A1A5S1	Pre-mRNA-processing factor 6 OS=Rattus norvegicus GN=Prpf6 PE=2 SV=1 - [PRP6_RAT]	0	1.06	1	1	1	1	132889	941	106.697	8.08936
P0C089	Phosphatidylglycerophosphatase and protein-tyrosine phosphatase 1 OS=Rattus norvegicus GN=Ptpmt1 PE=2 SV=1 - [PTPM1_RAT]	0	10.88	2	2	2	2	619173	193	21.8725	9.5835
Q62901	Arginine-glutamic acid dipeptide repeats protein OS=Rattus norvegicus GN=Rere PE=2 SV=2 - [RERE_RAT]	0	0.58	1	1	1	1	449025	1559	171.708	7.6792
P81128	Rho GTPase-activating protein 35 OS=Rattus norvegicus GN=Arhgap35 PE=1 SV=2 - [RHG35_RAT]	0	0.46	1	1	1	1		1513	172.27	6.72705
Q5RK27	Solute carrier family 12 member 7 OS=Rattus norvegicus GN=Slc12a7 PE=2 SV=2 - [S12A7_RAT]	0	0.74	1	1	1	1	4.69799e+09	1083	119.301	6.58057
Q9JHE5	Sodium-coupled neutral amino acid transporter 2 OS=Rattus norvegicus GN=Slc38a2 PE=1 SV=1 - [S38A2_RAT]	0	1.59	1	1	1	1	554936	504	55.5172	8.1333
Q6AY30	Saccharopine dehydrogenase-like oxidoreductase OS=Rattus norvegicus GN=Sccpdh PE=2 SV=1 - [SCPDL_RAT]	0	1.86	1	1	1	1		429	47.0581	8.83643
Q9JMD2	Scm-like with four MBT domains protein 1 OS=Rattus norvegicus GN=Sfmbt1 PE=2 SV=2 - [SMBT1_RAT]	0	0.7	1	1	1	2	6.45197e+06	863	97.4441	6.65381
Q5U2T3	SPATS2-like protein OS=Rattus norvegicus GN=Spats2l PE=2 SV=1 - [SPS2L_RAT]	0	1.08	1	1	1	3	5.79019e+06	558	61.7358	9.68604
Q99PK0	Pre-mRNA-splicing factor SYF1 OS=Rattus norvegicus GN=Xab2 PE=2 SV=1 - [SYF1_RAT]	0	1.05	1	1	1	1	2.9654e+06	855	99.9344	6.22705
Q4KM49	Tyrosine--tRNA ligase, cytoplasmic OS=Rattus norvegicus GN=Yars PE=2 SV=3 - [SYYC_RAT]	0	1.7	1	1	1	1	292387	528	59.078	7.00537
Q5U303-2	Isoform 2 of TGF-beta-activated kinase 1 and MAP3K7-binding protein 2 OS=Rattus norvegicus GN=Tab2 - [TAB2_RAT]	0	1.75	2	1	1	1	280064	627	68.7521	9.14404
P24155	Thimet oligopeptidase OS=Rattus norvegicus GN=Thop1 PE=1 SV=4 - [THOP1_RAT]	0	1.46	1	1	1	1	531377	687	78.3354	5.93506
Q5U2T1	TLC domain-containing protein 1 OS=Rattus norvegicus GN=Tlcd1 PE=2 SV=1 - [TLCD1_RAT]	0	9.31	1	1	1	1	7.1397e+06	247	28.7102	9.45166
Q63584	Transmembrane emp24 domain-containing protein 10 OS=Rattus norvegicus GN=Tmed10 PE=1 SV=2 - [TMEDA_RAT]	0	7.31	1	2	2	2	1.39199e+06	219	24.8418	6.41748
Q10836	Thyrotropin-releasing hormone-degrading ectoenzyme OS=Rattus norvegicus GN=Trhde PE=1 SV=1 - [TRHDE_RAT]	0	0.68	2	1	1	2	890849	1025	117.213	6.96143
Q5M7V1	Tripartite motif-containing 13 OS=Rattus norvegicus GN=Trim13 PE=2 SV=1 - [TRI13_RAT]	0	1.97	1	1	1	1		407	46.7847	5.80811
P32821	Trypsin V-A OS=Rattus norvegicus PE=2 SV=1 - [TRYA_RAT]	0	4.47	2	1	1	1		246	26.883	5.10986
Q9JJP9	Ubiquilin-1 OS=Rattus norvegicus GN=Ubqln1 PE=1 SV=1 - [UBQL1_RAT]	0	2.58	1	1	1	1	1.50803e+06	582	62.0323	4.94482
P17559	Uteroglobin OS=Rattus norvegicus GN=Scgb1a1 PE=1 SV=2 - [UTER_RAT]	0	10.42	1	1	1	1	595316	96	10.4425	5.0083
P29534	Vascular cell adhesion protein 1 OS=Rattus norvegicus GN=Vcam1 PE=2 SV=1 - [VCAM1_RAT]	0	1.22	1	1	1	1		739	81.1944	5.23682
O55145	Fractalkine OS=Rattus norvegicus GN=Cx3cl1 PE=2 SV=3 - [X3CL1_RAT]	0	2.29	2	1	1	1	630861	393	41.9502	7.26904
Q5XID0	Protein YIPF5 OS=Rattus norvegicus GN=Yipf5 PE=2 SV=1 - [YIPF5_RAT]	0	3.5	2	1	1	1		257	27.8846	4.36084
D3ZDA6	Protein Sdk2 OS=Rattus norvegicus GN=Sdk2 PE=4 SV=1 - [D3ZDA6_RAT]	0	0.83	1	1	1	1		2053	225.256	6.85889
Q6P4Z8	Dolichyl-phosphate (UDP-N-acetylglucosamine) N-acetylglucosaminephosphotransferase 1 (GlcNAc-1-P transferase) OS=Rattus norvegicus GN=Dpagt1 PE=2 SV=1 - [Q6P4Z8_RAT]	0	1.95	1	1	1	1	423189	410	46.4305	8.03076
F1M4A0	Protein Tjp1 OS=Rattus norvegicus GN=Tjp1 PE=4 SV=2 - [F1M4A0_RAT]	0	0.58	1	1	1	1	4.45484e+06	1733	193.912	6.58057
D4A190	Eukaryotic translation initiation factor 3, subunit 12 (Predicted), isoform CRA_b OS=Rattus norvegicus GN=Eif3k PE=4 SV=1 - [D4A190_RAT]	0	14.02	1	1	1	1	35233.6	107	12.351	4.70361
Q5FVC5	Poliovirus receptor-related 2 OS=Rattus norvegicus GN=Pvrl2 PE=2 SV=1 - [Q5FVC5_RAT]	0	0.94	1	1	1	2	4048542	530	57.2881	4.85596
B5DEY8	Protein Snx6 OS=Rattus norvegicus GN=Snx6 PE=2 SV=1 - [B5DEY8_RAT]	0	1.97	1	1	1	1		406	46.6077	6.16357
D4AEG3	Peptidylprolyl isomerase (Cyclophilin)-like 4 (Predicted) OS=Rattus norvegicus GN=Ppil4 PE=4 SV=2 - [D4AEG3_RAT]	0	2.52	1	1	1	1	833424	357	40.6484	4.91943
Q1RP74	Protein LOC100911774 OS=Rattus norvegicus GN=Tbcb PE=2 SV=1 - [Q1RP74_RAT]	0	3.69	2	1	1	1	610956	244	27.2303	4.99561
B5DFI9	Pdk3 protein OS=Rattus norvegicus GN=Pdk3 PE=2 SV=1 - [B5DFI9_RAT]	0	1.69	1	1	1	1	759547	415	47.9136	8.80713
Q4KM24	Peroxisomal biogenesis factor 11 beta OS=Rattus norvegicus GN=Pex11b PE=2 SV=1 - [Q4KM24_RAT]	0	4.26	1	1	1	1	256598	258	28.6243	9.78857
Q6AY21	GTPase activating protein (SH3 domain) binding protein 2 OS=Rattus norvegicus GN=G3bp2 PE=2 SV=1 - [Q6AY21_RAT]	0	1.78	1	1	1	1	783664	449	50.7391	5.42725
B3DMA1	Atxn2l protein OS=Rattus norvegicus GN=Atxn2l PE=2 SV=1 - [B3DMA1_RAT]	0	1.77	1	2	2	2	448549	1072	112.784	8.5874
D3ZDK7	Protein Pgp OS=Rattus norvegicus GN=Pgp PE=4 SV=1 - [D3ZDK7_RAT]	0	3.12	1	1	1	1	904333	321	34.5787	5.35107
G3V7I8	RCG57812, isoform CRA_b OS=Rattus norvegicus GN=Slk PE=4 SV=1 - [G3V7I8_RAT]	0	0.67	2	1	1	1	9.95168e+06	1203	137.556	5.021
D4A7L6	Protein Rpia OS=Rattus norvegicus GN=Rpia PE=3 SV=1 - [D4A7L6_RAT]	0	2.64	1	1	1	1	3.48161e+06	303	32.4517	8.01611
D4A676	GrpE protein homolog OS=Rattus norvegicus GN=Grpel2 PE=3 SV=1 - [D4A676_RAT]	0	4.02	1	1	1	1	261031	224	24.8829	7.13721
Q5BK16	Protein Trex1 OS=Rattus norvegicus GN=Trex1 PE=2 SV=1 - [Q5BK16_RAT]	0	3.16	1	1	1	2		316	33.5822	7.7085
D4A7F5	Kelch repeat and BTB (POZ) domain containing 3 (Predicted), isoform CRA_a OS=Rattus norvegicus GN=Kbtbd3 PE=4 SV=1 - [D4A7F5_RAT]	0	1.15	1	1	1	2	3.15071e+06	607	69.4581	5.87158
Q6YDN8	BWK-1 OS=Rattus norvegicus GN=Bwk1 PE=2 SV=1 - [Q6YDN8_RAT]	0	3.51	1	1	1	1	186061	228	26.7617	4.97021
D3ZXL8	Protein Nobox OS=Rattus norvegicus GN=Nobox PE=3 SV=1 - [D3ZXL8_RAT]	0	1.15	1	1	1	1	4.44045e+06	524	56.9926	6.07471
B1WC02	Ctps protein OS=Rattus norvegicus GN=Ctps PE=2 SV=1 - [B1WC02_RAT]	0	1.69	1	1	1	1	585457	591	66.5981	6.58057
D4A1J1	Protein Arhgef3 OS=Rattus norvegicus GN=Arhgef3 PE=4 SV=1 - [D4A1J1_RAT]	0	1.34	1	1	1	1	1.08709e+06	524	59.6083	6.25244
G3V861	Cytochrome P450, family 26, subfamily A, polypeptide 1 OS=Rattus norvegicus GN=Cyp26a1 PE=3 SV=1 - [G3V861_RAT]	0	3.42	4	1	1	1		497	56.1422	8.60205
Q5U2Y4	Neural cell expressed, developmentally down-regulated 9 OS=Rattus norvegicus GN=Nedd9 PE=2 SV=1 - [Q5U2Y4_RAT]	0	0.96	1	1	1	1	311775	833	92.9214	6.48096
B0BNJ4	Ethylmalonic encephalopathy 1 OS=Rattus norvegicus GN=Ethe1 PE=2 SV=1 - [B0BNJ4_RAT]	0	7.87	1	2	2	2	870189	254	27.659	7.06396
G3V8Q9	Adenomatosis polyposis coli, isoform CRA_a OS=Rattus norvegicus GN=Apc PE=4 SV=1 - [G3V8Q9_RAT]	0	0.21	2	1	1	1	6.18046e+06	2842	310.316	7.37158
B1WBR1	Golgi reassembly-stacking protein 1 OS=Rattus norvegicus GN=Gorasp1 PE=2 SV=1 - [B1WBR1_RAT]	0	2.24	2	1	1	1	1.62049e+06	446	47.0227	4.60205
D3ZZB2	Protein Pex1 OS=Rattus norvegicus GN=Pex1 PE=3 SV=1 - [D3ZZB2_RAT]	0	0.86	1	1	1	1	109669	1283	141.312	6.32861
F1LSW9	Ubiquitin carboxyl-terminal hydrolase (Fragment) OS=Rattus norvegicus GN=LOC100912059 PE=2 SV=2 - [F1LSW9_RAT]	0	3.56	2	1	1	1		365	42.252	6.59521
D3ZB89	Protein RGD1565989 OS=Rattus norvegicus GN=RGD1565989 PE=4 SV=1 - [D3ZB89_RAT]	0	2.55	1	1	1	1		274	31.8844	8.26514
B0BN66	Protein Sapcd2 OS=Rattus norvegicus GN=LOC680531 PE=2 SV=1 - [B0BN66_RAT]	0	1.55	1	1	1	1	5.54519e+06	387	42.46	8.74854
D4A629	Protein Pcmtd1 OS=Rattus norvegicus GN=Pcmtd1 PE=4 SV=1 - [D4A629_RAT]	0	2.52	1	1	1	1	516139	357	40.6275	5.65576
G3V765	Envoplakin (Predicted) OS=Rattus norvegicus GN=Evpl PE=4 SV=1 - [G3V765_RAT]	0	0.79	1	1	2	2		2029	230.971	6.58057
D4A3K7	Protein Frmpd4 OS=Rattus norvegicus GN=Frmpd4 PE=4 SV=1 - [D4A3K7_RAT]	0	0.53	1	1	1	1		1705	186.975	5.33838
D4A3U2	Protein Tspan18 OS=Rattus norvegicus GN=Tspan18 PE=4 SV=1 - [D4A3U2_RAT]	0	4.44	1	1	1	1	669116	248	27.7681	5.21143
G3V8M8	Poly (ADP-ribose) glycohydrolase, isoform CRA_b OS=Rattus norvegicus GN=Parg PE=4 SV=1 - [G3V8M8_RAT]	0	0.51	2	1	1	1	1.33261e+07	972	108.988	7.02002
Q5BJU9	Acin1 protein (Fragment) OS=Rattus norvegicus GN=Acin1 PE=2 SV=1 - [Q5BJU9_RAT]	0	3.11	1	2	2	4	4.34213e+06	515	59.8059	9.51025
O88341	Integrin alpha E2 (Fragment) OS=Rattus norvegicus GN=Itgae PE=2 SV=1 - [O88341_RAT]	0	1.29	2	1	1	1		1167	128.513	6.26514
D3ZH36	Protein LOC100910536 OS=Rattus norvegicus GN=Elfn2-ps1 PE=4 SV=2 - [D3ZH36_RAT]	0	1.22	1	1	1	1		820	89.9002	7.32764
D3ZW33	Protein Bach2 OS=Rattus norvegicus GN=Bach2 PE=4 SV=1 - [D3ZW33_RAT]	0	1.43	1	1	1	1	4.82011e+07	839	91.8853	5.10986
D4A9B0	Protein Srbd1 OS=Rattus norvegicus GN=Srbd1 PE=4 SV=2 - [D4A9B0_RAT]	0	0.82	2	1	1	1		980	110.074	8.82178
D4A3M6	Protein LOC690035 OS=Rattus norvegicus GN=LOC690035 PE=2 SV=2 - [D4A3M6_RAT]	0	1.31	2	1	1	1		1373	151.039	6.7124
D3ZJU9	Protein Lgr6 OS=Rattus norvegicus GN=Lgr6 PE=4 SV=1 - [D3ZJU9_RAT]	0	1.55	1	1	1	1	6.13041e+06	965	104.47	5.75732
D3ZD71	Protein Efhc1 OS=Rattus norvegicus GN=Efhc1 PE=4 SV=1 - [D3ZD71_RAT]	0	1.54	1	1	1	1	1.40996e+06	648	74.853	6.13818
D3ZET0	Uncharacterized protein OS=Rattus norvegicus PE=4 SV=2 - [D3ZET0_RAT]	0	1.93	1	1	1	1	504591	935	105.457	6.45557
F1LQ96	Gamma-synuclein OS=Rattus norvegicus GN=Sncg PE=2 SV=1 - [F1LQ96_RAT]	0	13.11	2	1	1	1	72688.3	122	12.9115	4.79248
G3V6U4	ELAV-like protein 2 OS=Rattus norvegicus GN=Elavl2 PE=4 SV=2 - [G3V6U4_RAT]	0	2.26	3	1	1	1		310	34.3158	9.53955
D3ZHI8	Protein Trappc11 OS=Rattus norvegicus GN=Trappc11 PE=4 SV=1 - [D3ZHI8_RAT]	0	1.41	1	1	1	1		1133	128.294	7.7085
D3ZZZ0	Protein Ahctf1 OS=Rattus norvegicus GN=Ahctf1 PE=4 SV=1 - [D3ZZZ0_RAT]	0	0.31	1	1	1	1	8.70167e+06	2240	247.729	6.58057
M0RB00	Uncharacterized protein OS=Rattus norvegicus PE=4 SV=1 - [M0RB00_RAT]	0	1.15	5	1	1	1	342873	1740	191.956	8.26514
Q63002	Mannose 6-phosphate/insulin-like growth factor II receptor OS=Rattus norvegicus GN=Igf2r PE=2 SV=1 - [Q63002_RAT]	0	0.32	2	1	1	3		2479	273.222	5.68115
D3ZI76	Protein Gpat2 OS=Rattus norvegicus GN=Gpat2 PE=4 SV=1 - [D3ZI76_RAT]	0	0.75	1	1	1	1		801	88.9122	7.1958
D3ZPH3	Uncharacterized protein (Fragment) OS=Rattus norvegicus PE=2 SV=2 - [D3ZPH3_RAT]	0	1.56	3	1	1	1	50457.4	577	64.5908	8.77783
M0R7Z3	Uncharacterized protein (Fragment) OS=Rattus norvegicus PE=4 SV=1 - [M0R7Z3_RAT]	0	0.66	1	1	1	1	8.25347e+06	1053	121.308	6.34131
D4A308	Uncharacterized protein OS=Rattus norvegicus PE=4 SV=2 - [D4A308_RAT]	0	1.31	3	1	1	1	960883	764	86.0973	6.96143
M0R7K1	Protein lin-7 homolog A OS=Rattus norvegicus GN=Lin7a PE=4 SV=1 - [M0R7K1_RAT]	0	10.56	4	1	2	3	604713	161	17.4091	7.50342
F1LQP9	Protein Tnpo1 (Fragment) OS=Rattus norvegicus GN=Tnpo1 PE=2 SV=2 - [F1LQP9_RAT]	0	1.23	1	1	1	2	436070	897	102.077	4.97021
D3ZGG8	Protein Hps3 OS=Rattus norvegicus GN=Hps3 PE=4 SV=2 - [D3ZGG8_RAT]	0	1.74	1	1	1	1	477835	861	97.4056	5.98584
F1LUI7	Protein Ankar OS=Rattus norvegicus GN=Ankar PE=4 SV=2 - [F1LUI7_RAT]	0	1.4	1	1	1	1		1427	161.215	8.1626
G3V9U2	3-ketoacyl-CoA thiolase, mitochondrial OS=Rattus norvegicus GN=Acaa2 PE=4 SV=2 - [G3V9U2_RAT]	0	2.02	2	1	1	2	327706	396	41.7575	8.14795
F1LWZ2	Uncharacterized protein (Fragment) OS=Rattus norvegicus PE=4 SV=2 - [F1LWZ2_RAT]	0	1.54	1	1	1	1	6.67662e+06	778	88.2221	9.02686
M0R8G9	Protein LOC100910599 OS=Rattus norvegicus GN=LOC100910599 PE=4 SV=1 - [M0R8G9_RAT]	0	2.23	2	1	1	1	1.28896e+06	314	35.1111	8.04541
F1LNV4	ATP-binding cassette sub-family B member 7, mitochondrial OS=Rattus norvegicus GN=Abcb7 PE=2 SV=2 - [F1LNV4_RAT]	0	0.8	2	1	1	1	562659	752	82.703	9.29053
D3ZPD0	Protein Ckap2 OS=Rattus norvegicus GN=RGD1564477 PE=4 SV=1 - [D3ZPD0_RAT]	0	2.07	1	1	1	1	704009	676	75.3841	9.12939
D3Z8X6	Protein Dtx3l OS=Rattus norvegicus GN=Dtx3l PE=4 SV=1 - [D3Z8X6_RAT]	0	1.07	1	1	1	1	398151	750	83.0507	8.03076
F1LYC7	Protein Bcorl1 OS=Rattus norvegicus GN=Bcorl1 PE=2 SV=2 - [F1LYC7_RAT]	0	0.45	1	1	1	1	1.29382e+06	1788	191.061	7.73779
D4AA13	Protein Dmxl1 OS=Rattus norvegicus GN=Dmxl1 PE=2 SV=1 - [D4AA13_RAT]	0	0.2	1	1	1	1	409836	3017	336.76	6.44287
Q6RKB2	Fasciclin II GPI-linked protein isoform OS=Rattus norvegicus GN=Ncam2 PE=2 SV=1 - [Q6RKB2_RAT]	0	1.51	3	1	1	1		727	81.135	6.30322
M0RCB5	Protein Phox2b OS=Rattus norvegicus GN=Phox2b PE=4 SV=1 - [M0RCB5_RAT]	0	4.92	5	1	1	1	1.80163e+06	183	20.1587	8.06006
F1LS26	Uncharacterized protein OS=Rattus norvegicus GN=Sbno1 PE=2 SV=1 - [F1LS26_RAT]	0	0.95	2	1	1	1	1.45394e+06	1269	140.724	7.78174
F1LPG2	Protein Dock8 OS=Rattus norvegicus GN=Dock8 PE=2 SV=2 - [F1LPG2_RAT]	0	0.24	1	1	1	1		2099	238.792	7.03467
F1M466	Protein Zcchc11 (Fragment) OS=Rattus norvegicus GN=Zcchc11 PE=4 SV=2 - [F1M466_RAT]	0	1.77	1	1	1	1		1073	120.573	7.82568
M0RBB1	Uncharacterized protein (Fragment) OS=Rattus norvegicus PE=4 SV=1 - [M0RBB1_RAT]	0	10.1	1	1	1	1	513521	99	10.5334	11.4878
D3ZXX3	Protein LOC689991 (Fragment) OS=Rattus norvegicus GN=LOC689991 PE=2 SV=2 - [D3ZXX3_RAT]	0	0.46	1	1	1	1	5.00685e+06	1731	193.815	6.21436
O88292	Protein C inhibitor OS=Rattus norvegicus GN=Serpina5 PE=2 SV=1 - [O88292_RAT]	0	1.48	4	1	1	1	1.95795e+06	406	45.5626	9.39307
F1M7J7	Protein Cep250 (Fragment) OS=Rattus norvegicus GN=Cep250 PE=2 SV=2 - [F1M7J7_RAT]	0	0.34	2	1	1	1	1.58238e+06	2354	269.936	5.04639
D3ZTC4	Protein Ccdc88b OS=Rattus norvegicus GN=Ccdc88b PE=4 SV=2 - [D3ZTC4_RAT]	0	0.41	2	1	1	1	2.58959e+06	1476	165.847	5.19873
F1LY67	Growth factor receptor-bound protein 14 OS=Rattus norvegicus GN=Grb14 PE=4 SV=2 - [F1LY67_RAT]	0	2.23	2	1	1	1	467307	538	60.559	8.54346
G3V9T2	Protein Tmf1 OS=Rattus norvegicus GN=Tmf1 PE=4 SV=2 - [G3V9T2_RAT]	0	0.82	1	1	1	1		1091	121.569	4.86865
D3ZPL8	Protein Armc3 OS=Rattus norvegicus GN=Armc3 PE=2 SV=1 - [D3ZPL8_RAT]	0	1.9	3	1	1	1	522600	684	74.6317	5.49072
D3ZUZ9	Peptidyl-prolyl cis-trans isomerase OS=Rattus norvegicus GN=Ppih PE=2 SV=2 - [D3ZUZ9_RAT]	0	5.29	2	1	1	2	452448	170	18.5994	8.73389
F1M614	Protein Lama2 (Fragment) OS=Rattus norvegicus GN=Lama2 PE=2 SV=2 - [F1M614_RAT]	0	0.27	1	1	1	1	1.7752e+06	2546	280.438	5.92236
D3ZCI1	Protein Dtl OS=Rattus norvegicus GN=Dtl PE=2 SV=1 - [D3ZCI1_RAT]	0	1.11	2	1	1	1		719	77.5802	8.71924
D3ZR66	Protein Ccdc158 OS=Rattus norvegicus GN=Ccdc158 PE=2 SV=1 - [D3ZR66_RAT]	0	1.98	2	1	1	1	3.39794e+07	354	40.8095	5.26221
D3ZSV8	Protein Unc79 OS=Rattus norvegicus GN=Unc79 PE=2 SV=2 - [D3ZSV8_RAT]	0	0.3	1	1	1	1	3.08078e+06	2649	296.702	6.41748
Q498D4	Tln1 protein OS=Rattus norvegicus GN=Tln1 PE=2 SV=1 - [Q498D4_RAT]	0	0.71	2	1	1	1	2.40449e+07	1552	161.877	6.23975
