# Supplementary material for: Mysterious inhibitory cell regulator investigated and found likely to be secretogranin II related
Source: PeerJ. 2017 Oct 13;5:e3833. doi: 10.7717/peerj.3833 (PMC5642266; doi:10.7717/peerj.3833)
Supplement: Supplemental Information 11 — Test specifics 603. [file peerj-05-3833-s011.xlsx]

## Sheet: Sheet1
Accession	Description	A5: Area	B5: Area	Score A2	Coverage A2	# Peptides A2	# PSM A2	Score B2	Coverage B2	# Peptides B2	# PSM B2	# AAs	MW [kDa]	calc. pI
P29266	3-hydroxyisobutyrate dehydrogenase, mitochondrial OS=Rattus norvegicus GN=Hibadh PE=1 SV=3 - [3HIDH_RAT]	0	526682					2.51246	3.88	1	1	335	35.2796	8.47021	A: P2
Q6AYP7	7-methylguanosine phosphate-specific 5'-nucleotidase OS=Rattus norvegicus GN=Nt5c3b PE=2 SV=2 - [5NT3B_RAT]	0	794485					2.01516	3	1	1	300	34.5134	6.45557	B: P1
P85968	6-phosphogluconate dehydrogenase, decarboxylating OS=Rattus norvegicus GN=Pgd PE=1 SV=1 - [6PGD_RAT]	0	1.13683e+06					3.43008	3.52	1	1	483	53.202	7.02002
Q91ZF7	Alanine and arginine-rich domain-containing protein OS=Rattus norvegicus GN=Aard PE=2 SV=1 - [AARD_RAT]	0	303282					0	6.06	1	1	165	18.7656	10.8579
Q5XI97	Alanyl-tRNA editing protein Aarsd1 OS=Rattus norvegicus GN=Aarsd1 PE=2 SV=1 - [AASD1_RAT]	0	388657					1.86902	2.43	1	1	412	45.0652	6.48096
P35745	Acylphosphatase-2 OS=Rattus norvegicus GN=Acyp2 PE=1 SV=2 - [ACYP2_RAT]	0	542203					2.2345	13.4	1	1	97	10.8565	9.26123
Q10743	Disintegrin and metalloproteinase domain-containing protein 10 (Fragment) OS=Rattus norvegicus GN=Adam10 PE=2 SV=1 - [ADA10_RAT]	0	0					1.71004	2.21	1	1	544	60.4052	8.04541
Q5FWY5	AH receptor-interacting protein OS=Rattus norvegicus GN=Aip PE=1 SV=1 - [AIP_RAT]	0	539480					1.8638	3.64	1	1	330	37.5752	6.53662
Q499M5	Ankyrin repeat domain-containing protein 16 OS=Rattus norvegicus GN=Ankrd16 PE=2 SV=1 - [ANR16_RAT]	0	0					1.68718	2.97	1	1	370	40.5343	6.62451
Q76K24	Ankyrin repeat domain-containing protein 46 OS=Rattus norvegicus GN=Ankrd46 PE=2 SV=1 - [ANR46_RAT]	0	633407					6.61777	9.65	2	3	228	25.1649	5.93506
P62744	AP-2 complex subunit sigma OS=Rattus norvegicus GN=Ap2s1 PE=2 SV=1 - [AP2S1_RAT]	0	2.14097e+06					1.62678	4.93	1	1	142	17.0067	6.17627
P36972	Adenine phosphoribosyltransferase OS=Rattus norvegicus GN=Aprt PE=1 SV=1 - [APT_RAT]	0	1.78554e+06					1.94486	5.56	1	1	180	19.5334	6.56592
P62332	ADP-ribosylation factor 6 OS=Rattus norvegicus GN=Arf6 PE=1 SV=2 - [ARF6_RAT]	0	2.03325e+07					12.3849	12.57	3	8	175	20.0694	8.95361
Q63055	ADP-ribosylation factor-related protein 1 OS=Rattus norvegicus GN=Arfrp1 PE=2 SV=1 - [ARFRP_RAT]	0	357467					3.05809	10.95	2	2	201	22.6444	6.55127
P61212	ADP-ribosylation factor-like protein 1 OS=Rattus norvegicus GN=Arl1 PE=1 SV=1 - [ARL1_RAT]	0	7.03039e+06					2.20496	8.29	2	4	181	20.3985	5.71924
Q66HA6	ADP-ribosylation factor-like protein 8B OS=Rattus norvegicus GN=Arl8b PE=2 SV=1 - [ARL8B_RAT]	0	1.39751e+06					3.81015	18.28	4	5	186	21.5251	8.42627
Q91XT9	Neutral ceramidase OS=Rattus norvegicus GN=Asah2 PE=1 SV=1 - [ASAH2_RAT]	0	0					0	3.29	2	2	761	83.4352	7.00537
P55926-2	Isoform 2 of Acid-sensing ion channel 1 OS=Rattus norvegicus GN=Asic1 - [ASIC1_RAT]	0	2.3625e+06					1.75403	2.35	1	1	425	47.5318	5.021
P49088	Asparagine synthetase [glutamine-hydrolyzing] OS=Rattus norvegicus GN=Asns PE=2 SV=3 - [ASNS_RAT]	0	1.18741e+06					0	1.43	1	1	561	64.2055	6.45557
P29418	ATP synthase subunit epsilon, mitochondrial OS=Rattus norvegicus GN=Atp5e PE=1 SV=2 - [ATP5E_RAT]	0	5.29115e+06					0	29.41	2	2	51	5.76311	10.0083
P11608	ATP synthase protein 8 OS=Rattus norvegicus GN=Mt-atp8 PE=1 SV=1 - [ATP8_RAT]	0	694049					1.93883	19.4	1	1	67	7.63698	9.31982
Q99J86-2	Isoform 2 of Attractin OS=Rattus norvegicus GN=Atrn - [ATRN_RAT]	0	646666					2.40208	1.02	1	1	1275	141.428	7.00537
Q64559-1	Isoform 1 of Cytosolic acyl coenzyme A thioester hydrolase OS=Rattus norvegicus GN=Acot7 - [BACH_RAT]	0	194119					1.62578	3.25	1	1	338	37.5372	7.51807
Q05175	Brain acid soluble protein 1 OS=Rattus norvegicus GN=Basp1 PE=1 SV=2 - [BASP1_RAT]	0	84030.4					4.18676	6.36	1	4	220	21.7774	4.51318
P70645	Bleomycin hydrolase OS=Rattus norvegicus GN=Blmh PE=1 SV=1 - [BLMH_RAT]	0	278760					0	2.42	1	1	454	52.2888	6.48096
B2RYM5	Lys-63-specific deubiquitinase BRCC36 OS=Rattus norvegicus GN=Brcc3 PE=2 SV=1 - [BRCC3_RAT]	0	2.23181e+06					8.95888	7.9	2	3	291	32.9947	6.26514
B2DD29	Serine/threonine-protein kinase BRSK1 OS=Rattus norvegicus GN=Brsk1 PE=1 SV=1 - [BRSK1_RAT]	0	1.69351e+06					1.83543	1.03	1	2	778	85.1298	9.31982
O35796	Complement component 1 Q subcomponent-binding protein, mitochondrial OS=Rattus norvegicus GN=C1qbp PE=1 SV=2 - [C1QBP_RAT]	0	453767					2.80324	7.17	1	1	279	30.9775	4.86865
P22002-4	Isoform 4 of Voltage-dependent L-type calcium channel subunit alpha-1C OS=Rattus norvegicus GN=Cacna1c - [CAC1C_RAT]	0	7.64461e+06					1.66633	0.51	1	1	2139	239.892	6.90283
Q08163	Adenylyl cyclase-associated protein 1 OS=Rattus norvegicus GN=Cap1 PE=1 SV=3 - [CAP1_RAT]	0	1.54987e+06					3.92653	4.01	2	2	474	51.5565	7.51807
Q62717	Calcium-dependent secretion activator 1 OS=Rattus norvegicus GN=Cadps PE=1 SV=1 - [CAPS1_RAT]	0	526932					2.21377	0.93	1	1	1289	146.173	5.8208
Q5U2X0	CDKN2A-interacting protein OS=Rattus norvegicus GN=Cdkn2aip PE=2 SV=1 - [CARF_RAT]	0	148954					2.64566	2.46	1	1	570	60.7067	9.20264
P00787	Cathepsin B OS=Rattus norvegicus GN=Ctsb PE=1 SV=2 - [CATB_RAT]	0	2.20646e+06					14.9438	16.22	4	7	339	37.4456	5.60498
P07154	Cathepsin L1 OS=Rattus norvegicus GN=Ctsl1 PE=1 SV=2 - [CATL1_RAT]	0	1.06024e+06					10.5453	4.79	1	3	334	37.636	6.82959
Q6AY04	Uncharacterized protein C2orf47 homolog, mitochondrial OS=Rattus norvegicus PE=2 SV=1 - [CB047_RAT]	0	957216					2.43889	8.93	3	3	291	33.0692	9.0415
Q63692	Hsp90 co-chaperone Cdc37 OS=Rattus norvegicus GN=Cdc37 PE=1 SV=2 - [CDC37_RAT]	0	954310					0	1.85	1	1	379	44.4819	5.33838
Q5FVI4	Cell cycle exit and neuronal differentiation protein 1 OS=Rattus norvegicus GN=Cend1 PE=1 SV=1 - [CEND_RAT]	0	53307					2.21998	10.74	1	1	149	15.0339	8.96826
Q5I0E3	Uncharacterized protein C7orf50 homolog OS=Rattus norvegicus PE=2 SV=1 - [CG050_RAT]	0	447005					1.7851	5.7	1	2	193	22.1129	9.78857
A0JPQ9	Chitinase domain-containing protein 1 OS=Rattus norvegicus GN=Chid1 PE=2 SV=2 - [CHID1_RAT]	0	309867					7.34015	5.85	2	3	393	44.8463	7.97217
Q8CGS4	Charged multivesicular body protein 3 OS=Rattus norvegicus GN=Chmp3 PE=1 SV=3 - [CHMP3_RAT]	0	506196					0	3.59	1	1	223	25.0457	5.12256
P61023	Calcineurin B homologous protein 1 OS=Rattus norvegicus GN=Chp1 PE=1 SV=2 - [CHP1_RAT]	0	514049					2.68518	6.15	1	1	195	22.4183	5.09717
Q9WU49	Calcium-regulated heat stable protein 1 OS=Rattus norvegicus GN=Carhsp1 PE=1 SV=1 - [CHSP1_RAT]	0	352500					4.13365	10.88	1	2	147	15.896	8.20654
B0K020	CDGSH iron-sulfur domain-containing protein 1 OS=Rattus norvegicus GN=Cisd1 PE=3 SV=1 - [CISD1_RAT]	0	1.65153e+06					8.45113	25.93	2	3	108	12.0891	8.83643
Q9JLH6	CDK5 regulatory subunit-associated protein 1 OS=Rattus norvegicus GN=Cdk5rap1 PE=1 SV=1 - [CK5P1_RAT]	0	1.21192e+06					0	2.73	2	2	586	65.8248	8.42627
Q99JD4	CLIP-associating protein 2 OS=Rattus norvegicus GN=Clasp2 PE=2 SV=1 - [CLAP2_RAT]	0	377171					1.84075	0.78	1	1	1286	140.551	8.57275
P08081-2	Isoform Non-brain of Clathrin light chain A OS=Rattus norvegicus GN=Clta - [CLCA_RAT]	0	1.67129e+06					3.72637	7.34	2	2	218	23.5514	4.50049
P08082-2	Isoform Non-brain of Clathrin light chain B OS=Rattus norvegicus GN=Cltb - [CLCB_RAT]	0	1.42983e+06					14.3234	8.53	2	6	211	23.1062	4.67822
Q9Z1L1	Claudin-7 OS=Rattus norvegicus GN=Cldn7 PE=1 SV=2 - [CLD7_RAT]	0	221242					2.40643	7.58	1	1	211	22.4162	8.70459
P62634	Cellular nucleic acid-binding protein OS=Rattus norvegicus GN=Cnbp PE=2 SV=1 - [CNBP_RAT]	0	1.44914e+06					25.5997	19.77	3	7	177	19.4496	7.7085
B0BNA9	CCR4-NOT transcription complex subunit 11 OS=Rattus norvegicus GN=Cnot11 PE=2 SV=1 - [CNO11_RAT]	0	305989					1.65959	2.38	1	1	504	54.8012	6.55127
P00406	Cytochrome c oxidase subunit 2 OS=Rattus norvegicus GN=Mtco2 PE=2 SV=2 - [COX2_RAT]	0	875275					1.64715	4.41	1	1	227	25.9251	4.729
P12075	Cytochrome c oxidase subunit 5B, mitochondrial OS=Rattus norvegicus GN=Cox5b PE=1 SV=2 - [COX5B_RAT]	0	757580					1.92608	9.3	1	1	129	13.9059	7.78174
Q6AYA6	Uncharacterized protein C17orf62 homolog OS=Rattus norvegicus PE=2 SV=1 - [CQ062_RAT]	0	552399					8.75729	11.76	2	4	187	20.8809	8.5874
Q4V7F2	Cysteine-rich with EGF-like domain protein 1 OS=Rattus norvegicus GN=Creld1 PE=2 SV=1 - [CREL1_RAT]	0	688918					2.46099	2.62	1	1	420	45.666	5.0083
P63255	Cysteine-rich protein 1 OS=Rattus norvegicus GN=Crip1 PE=1 SV=2 - [CRIP1_RAT]	0	627886					2.14703	12.99	1	2	77	8.54399	8.57275
P36201	Cysteine-rich protein 2 OS=Rattus norvegicus GN=Crip2 PE=2 SV=1 - [CRIP2_RAT]	0	998650					6.95993	7.69	1	2	208	22.6811	8.63135
P19139	Casein kinase II subunit alpha OS=Rattus norvegicus GN=Csnk2a1 PE=1 SV=2 - [CSK21_RAT]	0	255885					0	3.84	1	1	391	45.0448	7.73779
P67874	Casein kinase II subunit beta OS=Rattus norvegicus GN=Csnk2b PE=1 SV=1 - [CSK2B_RAT]	0	1.6739e+06					11.7991	9.3	2	5	215	24.926	5.5542
P61203-2	Isoform 2 of COP9 signalosome complex subunit 2 OS=Rattus norvegicus GN=Cops2 - [CSN2_RAT]	0	219263					2.1941	2.49	1	1	402	46.8843	5.16064
Q6P4Z9	COP9 signalosome complex subunit 8 OS=Rattus norvegicus GN=Cops8 PE=2 SV=1 - [CSN8_RAT]	0	402050					7.49495	7.18	1	3	209	23.221	5.19873
Q9ERB4-3	Isoform Vint of Versican core protein OS=Rattus norvegicus GN=Vcan - [CSPG2_RAT]	0	93658.5					0	0.74	1	1	2712	296.684	4.55127
Q5BJP2	Spliceosome-associated protein CWC15 homolog OS=Rattus norvegicus GN=Cwc15 PE=2 SV=1 - [CWC15_RAT]	0	89608.6					2.51519	4.8	1	1	229	26.6223	5.70654
Q921A4	Cytoglobin OS=Rattus norvegicus GN=Cygb PE=1 SV=1 - [CYGB_RAT]	0	0					1.60034	4.74	1	1	190	21.483	6.80029
P01041	Cystatin-B OS=Rattus norvegicus GN=Cstb PE=1 SV=1 - [CYTB_RAT]	0	2.20316e+06					2.50961	11.22	1	1	98	11.1886	6.30322
P61805	Dolichyl-diphosphooligosaccharide--protein glycosyltransferase subunit DAD1 OS=Rattus norvegicus GN=Dad1 PE=3 SV=3 - [DAD1_RAT]	0	1.35129e+06					5.24368	19.47	2	2	113	12.4886	7.07861
Q6AY55	Dephospho-CoA kinase domain-containing protein OS=Rattus norvegicus GN=Dcakd PE=2 SV=1 - [DCAKD_RAT]	0	818201					2.26728	6.25	1	1	240	27.3347	9.68604
P0C1S9	Sn1-specific diacylglycerol lipase beta OS=Rattus norvegicus GN=Daglb PE=1 SV=1 - [DGLB_RAT]	0	3.03317e+06					1.67729	1.5	1	1	668	73.7235	6.66846
Q9Z2Z8	7-dehydrocholesterol reductase OS=Rattus norvegicus GN=Dhcr7 PE=2 SV=1 - [DHCR7_RAT]	0	854705					3.78588	4.67	2	2	471	54.1194	8.35303
P11348	Dihydropteridine reductase OS=Rattus norvegicus GN=Qdpr PE=1 SV=1 - [DHPR_RAT]	0	1.9236e+06					2.03408	7.47	2	2	241	25.5359	7.81104
Q9Z330-8	Isoform 8 of DNA (cytosine-5)-methyltransferase 1 OS=Rattus norvegicus GN=Dnmt1 - [DNMT1_RAT]	0	227208					1.62444	0.68	1	1	1333	150.385	7.18115
P80254	D-dopachrome decarboxylase OS=Rattus norvegicus GN=Ddt PE=1 SV=3 - [DOPD_RAT]	0	2.14247e+06					9.67113	29.66	3	5	118	13.1248	6.53662
Q5RJY4-2	Isoform 2 of Dehydrogenase/reductase SDR family member 7B OS=Rattus norvegicus GN=Dhrs7b - [DRS7B_RAT]	0	475073					2.67091	3.8	1	1	316	34.3761	9.42236
Q5U216	ATP-dependent RNA helicase DDX39A OS=Rattus norvegicus GN=Ddx39a PE=2 SV=1 - [DX39A_RAT]	0	623911					1.66945	1.87	1	1	427	49.078	5.68115
Q9Z336	Dynein light chain Tctex-type 1 OS=Rattus norvegicus GN=Dynlt1 PE=1 SV=1 - [DYLT1_RAT]	0	1.21903e+06					4.9815	14.16	1	3	113	12.444	5.08447
P14604	Enoyl-CoA hydratase, mitochondrial OS=Rattus norvegicus GN=Echs1 PE=1 SV=1 - [ECHM_RAT]	0	2.05826e+06					18.9219	21.03	5	10	290	31.4962	8.1333
P23965	Enoyl-CoA delta isomerase 1, mitochondrial OS=Rattus norvegicus GN=Eci1 PE=1 SV=1 - [ECI1_RAT]	0	2.22894e+06					28.1437	24.91	6	13	289	32.234	9.53955
Q4KM77	Etoposide-induced protein 2.4 homolog OS=Rattus norvegicus GN=Ei24 PE=2 SV=1 - [EI24_RAT]	0	1.10243e+06					1.62088	4.71	2	2	340	38.8676	9.71533
B5DFC8	Eukaryotic translation initiation factor 3 subunit C OS=Rattus norvegicus GN=Eif3c PE=2 SV=1 - [EIF3C_RAT]	0	629463					1.88674	2.09	2	2	911	105.369	5.78271
Q5U2V8	ER membrane protein complex subunit 3 OS=Rattus norvegicus GN=Emc3 PE=2 SV=3 - [EMC3_RAT]	0	613725					7.24718	8.43	2	3	261	29.9604	6.81494
Q5FVL2	ER membrane protein complex subunit 8 OS=Rattus norvegicus GN=Emc8 PE=2 SV=1 - [EMC8_RAT]	0	1.48978e+06					2.30718	4.35	1	1	207	23.3904	6.15088
P84039	Ectonucleotide pyrophosphatase/phosphodiesterase family member 5 OS=Rattus norvegicus GN=Enpp5 PE=1 SV=2 - [ENPP5_RAT]	0	453337					2.09064	2.1	1	1	477	54.2554	6.22705
Q9JJ22-2	Isoform 2 of Endoplasmic reticulum aminopeptidase 1 OS=Rattus norvegicus GN=Erap1 - [ERAP1_RAT]	0	830622					3.36446	3.17	3	4	884	100.665	6.37939
Q5U2Q7	Eukaryotic peptide chain release factor subunit 1 OS=Rattus norvegicus GN=Etf1 PE=2 SV=3 - [ERF1_RAT]	0	170474					2.21991	2.29	1	1	437	49.0002	5.70654
P56571	ES1 protein homolog, mitochondrial OS=Rattus norvegicus PE=1 SV=2 - [ES1_RAT]	0	2.24315e+06					3.36457	6.39	2	2	266	28.1549	8.92432
Q64573	Liver carboxylesterase 4 OS=Rattus norvegicus PE=2 SV=2 - [EST4_RAT]	0	0					1.73893	1.43	1	1	561	62.2687	6.75635
O54922	Exocyst complex component 7 OS=Rattus norvegicus GN=Exoc7 PE=2 SV=1 - [EXOC7_RAT]	0	300377					1.77038	2.6	2	2	653	74.9988	6.7124
Q6AXX6	Redox-regulatory protein FAM213A OS=Rattus norvegicus GN=Fam213a PE=1 SV=1 - [F213A_RAT]	0	126667					2.08486	5.68	1	1	229	25.7465	9.14404
Q9EST9	Fibroblast growth factor 20 OS=Rattus norvegicus GN=Fgf20 PE=2 SV=1 - [FGF20_RAT]	0	0					0	7.55	1	1	212	23.5221	8.76318
P63077	Guanine nucleotide-binding protein G(I)/G(S)/G(O) subunit gamma-8 OS=Rattus norvegicus GN=Gng8 PE=2 SV=1 - [GBG8_RAT]	0	514795					2.68632	22.86	1	1	70	7.83806	7.13721
P60517	Gamma-aminobutyric acid receptor-associated protein OS=Rattus norvegicus GN=Gabarap PE=1 SV=1 - [GBRAP_RAT]	0	2.44529e+06					1.71277	5.98	1	1	117	13.9093	8.79248
Q5XI73	Rho GDP-dissociation inhibitor 1 OS=Rattus norvegicus GN=Arhgdia PE=1 SV=1 - [GDIR1_RAT]	0	5.18613e+06					15.1288	15.2	2	4	204	23.3928	5.19873
O35952-2	Isoform 2 of Hydroxyacylglutathione hydrolase, mitochondrial OS=Rattus norvegicus GN=Hagh - [GLO2_RAT]	0	707154					5.84175	7.69	2	3	260	28.8778	6.94678
Q62931	Golgi SNAP receptor complex member 1 OS=Rattus norvegicus GN=Gosr1 PE=1 SV=1 - [GOSR1_RAT]	0	818316					1.62436	3.6	1	1	250	28.5155	9.29053
P62994-3	Isoform 3 of Growth factor receptor-bound protein 2 OS=Rattus norvegicus GN=Grb2 - [GRB2_RAT]	0	0					2.0747	16.95	1	1	59	6.87537	5.09717
P31421	Metabotropic glutamate receptor 2 OS=Rattus norvegicus GN=Grm2 PE=1 SV=1 - [GRM2_RAT]	0	0					0	1.03	1	1	872	95.7123	7.79639
Q5U2Y1-2	Isoform 2 of General transcription factor II-I OS=Rattus norvegicus GN=Gtf2i - [GTF2I_RAT]	0	603874					3.9757	1.86	1	1	913	102.961	8.76318
P11167	Solute carrier family 2, facilitated glucose transporter member 1 OS=Rattus norvegicus GN=Slc2a1 PE=1 SV=1 - [GTR1_RAT]	0	4.48735e+06					3.86216	2.85	2	3	492	53.9274	8.71924
Q62785	28 kDa heat- and acid-stable phosphoprotein OS=Rattus norvegicus GN=Pdap1 PE=1 SV=1 - [HAP28_RAT]	0	388189					2.60391	7.18	1	1	181	20.5925	7.38623
Q9WVK7	Hydroxyacyl-coenzyme A dehydrogenase, mitochondrial OS=Rattus norvegicus GN=Hadh PE=2 SV=1 - [HCDH_RAT]	0	1.36579e+06					2.54794	5.73	2	3	314	34.4259	8.76318
Q925G1-2	Isoform 2 of Hepatoma-derived growth factor-related protein 2 OS=Rattus norvegicus GN=Hdgfrp2 - [HDGR2_RAT]	0	48174.7					0	1.65	1	1	668	73.8872	7.88428
Q9JJ54-4	Isoform 4 of Heterogeneous nuclear ribonucleoprotein D0 OS=Rattus norvegicus GN=Hnrnpd - [HNRPD_RAT]	0	393227					6.3973	7.72	2	3	285	30.451	8.41162
Q794E4	Heterogeneous nuclear ribonucleoprotein F OS=Rattus norvegicus GN=Hnrnpf PE=1 SV=3 - [HNRPF_RAT]	0	660451					1.93835	2.41	1	2	415	45.7009	5.49072
P41565	Isocitrate dehydrogenase [NAD] subunit gamma 1, mitochondrial OS=Rattus norvegicus GN=Idh3g PE=2 SV=2 - [IDHG1_RAT]	0	2.50455e+06					2.81923	2.8	1	1	393	42.8242	8.89502
P63074	Eukaryotic translation initiation factor 4E OS=Rattus norvegicus GN=Eif4e PE=1 SV=1 - [IF4E_RAT]	0	1.91232e+06					9.82724	13.36	2	4	217	25.0375	6.15088
Q5XI72	Eukaryotic translation initiation factor 4H OS=Rattus norvegicus GN=Eif4h PE=1 SV=1 - [IF4H_RAT]	0	540523					2.3989	5.24	1	1	248	27.3074	7.2251
Q3KRD8	Eukaryotic translation initiation factor 6 OS=Rattus norvegicus GN=Eif6 PE=2 SV=1 - [IF6_RAT]	0	964623					11.9403	10.2	2	4	245	26.5542	4.7417
Q99J82	Integrin-linked protein kinase OS=Rattus norvegicus GN=Ilk PE=2 SV=1 - [ILK_RAT]	0	593673					1.94985	1.77	1	1	452	51.3399	8.07471
O88823	Protein JTB OS=Rattus norvegicus GN=Jtb PE=2 SV=1 - [JTB_RAT]	0	241766					4.21151	8.9	1	2	146	16.3744	8.19189
A1A5R8	Uncharacterized protein KIAA1841 homolog OS=Rattus norvegicus PE=2 SV=1 - [K1841_RAT]	0	0					1.80636	1.63	1	1	737	84.2908	6.53662
P62483	Voltage-gated potassium channel subunit beta-2 OS=Rattus norvegicus GN=Kcnab2 PE=1 SV=1 - [KCAB2_RAT]	0	1.63887e+06					2.6592	2.72	1	1	367	40.995	8.99756
P19024	Potassium voltage-gated channel subfamily A member 5 OS=Rattus norvegicus GN=Kcna5 PE=1 SV=1 - [KCNA5_RAT]	0	287503					1.69914	1.99	1	1	602	66.511	5.80811
P25809	Creatine kinase U-type, mitochondrial OS=Rattus norvegicus GN=Ckmt1 PE=1 SV=1 - [KCRU_RAT]	0	1.16578e+06					1.84337	3.83	2	3	418	46.9993	8.48486
F8WLE0	Kinesin-like protein KLP6 OS=Rattus norvegicus GN=Klp6 PE=2 SV=1 - [KLP6_RAT]	0	0					1.79418	0.87	1	1	1034	115.469	6.65381
O08618	Phosphoribosyl pyrophosphate synthase-associated protein 2 OS=Rattus norvegicus GN=Prpsap2 PE=2 SV=1 - [KPRB_RAT]	0	293419					0	2.44	1	1	369	40.8403	7.1665
P11762	Galectin-1 OS=Rattus norvegicus GN=Lgals1 PE=1 SV=2 - [LEG1_RAT]	0	4.5699e+06					17.2325	25.93	3	9	135	14.8472	5.26221
Q6P7Q4	Lactoylglutathione lyase OS=Rattus norvegicus GN=Glo1 PE=1 SV=3 - [LGUL_RAT]	0	701310					1.8193	4.89	1	1	184	20.8063	5.31299
D3ZAL8	Leucine-rich repeat transmembrane neuronal protein 3 OS=Rattus norvegicus GN=Lrrtm3 PE=3 SV=1 - [LRRT3_RAT]	0	1.46648e+07					1.76537	0.86	1	2	582	65.9882	9.18799
Q5U204	Ragulator complex protein LAMTOR3 OS=Rattus norvegicus GN=Lamtor3 PE=2 SV=1 - [LTOR3_RAT]	0	206198					1.60325	8.87	1	1	124	13.5713	7.34229
O08679	Serine/threonine-protein kinase MARK2 OS=Rattus norvegicus GN=Mark2 PE=1 SV=1 - [MARK2_RAT]	0	577670					0	0.97	1	1	722	80.8215	9.61279
Q5FVN0	Lysophospholipid acyltransferase 5 OS=Rattus norvegicus GN=Lpcat3 PE=2 SV=1 - [MBOA5_RAT]	0	1.33445e+06					0	1.85	1	1	487	55.9808	8.68994
Q5U2U7	mRNA cap guanine-N7 methyltransferase OS=Rattus norvegicus GN=Rnmt PE=2 SV=1 - [MCES_RAT]	0	1.05234e+06					4.60852	6.29	3	3	461	52.7833	6.39209
B1H268	Mini-chromosome maintenance complex-binding protein OS=Rattus norvegicus GN=Mcmbp PE=2 SV=1 - [MCMBP_RAT]	0	938241					9.51817	5.45	3	4	642	72.9609	5.87158
Q9WVR8-2	Isoform 2 of Menin OS=Rattus norvegicus GN=Men1 - [MEN1_RAT]	0	93587					0	1.98	1	1	555	61.2495	6.62451
Q4QR85	Methylosome protein 50 OS=Rattus norvegicus GN=Wdr77 PE=1 SV=1 - [MEP50_RAT]	0	775425					3.03341	4.39	1	1	342	37.0521	5.2749
Q5RJL6	Meteorin-like protein OS=Rattus norvegicus GN=Metrnl PE=2 SV=1 - [METRL_RAT]	0	7.82005e+06					2.0076	2.57	1	2	311	34.4464	7.86963
Q5FVQ4	Malectin OS=Rattus norvegicus GN=Mlec PE=2 SV=1 - [MLEC_RAT]	0	814419					5.5981	4.47	1	2	291	32.3978	5.5542
B5DFN3	Mitochondrial nucleoid factor 1 OS=Rattus norvegicus GN=Mnf1 PE=2 SV=1 - [MNF1_RAT]	0	953441					5.54773	9.56	1	2	136	16.3203	9.23193
O35910	Monocarboxylate transporter 4 OS=Rattus norvegicus GN=Slc16a3 PE=2 SV=1 - [MOT4_RAT]	0	105420					1.95419	1.7	1	1	471	50.5154	8.104
P38718-2	Isoform Short of Mitochondrial pyruvate carrier 2 OS=Rattus norvegicus GN=Mpc2 - [MPC2_RAT]	0	1.24202e+06					1.77584	12.93	2	2	116	12.9599	10.77
Q7TT49	Serine/threonine-protein kinase MRCK beta OS=Rattus norvegicus GN=Cdc42bpb PE=1 SV=1 - [MRCKB_RAT]	0	2.56103e+07					2.13947	0.7	1	1	1713	194.765	6.45557
Q5HZE4	Methylthioribose-1-phosphate isomerase OS=Rattus norvegicus GN=Mri1 PE=2 SV=1 - [MTNA_RAT]	0	1282226					1.72623	5.42	2	2	369	39.5625	6.04932
P62775	Myotrophin OS=Rattus norvegicus GN=Mtpn PE=1 SV=2 - [MTPN_RAT]	0	1.46386e+06					12.3192	14.41	1	3	118	12.8526	5.51611
B1WC40	Nuclear cap-binding protein subunit 2 OS=Rattus norvegicus GN=Ncbp2 PE=2 SV=1 - [NCBP2_RAT]	0	430218					1.99936	7.05	1	1	156	18.0058	7.81104
P55770	NHP2-like protein 1 OS=Rattus norvegicus GN=Nhp2l1 PE=2 SV=4 - [NH2L1_RAT]	0	868796					2.3628	9.38	1	1	128	14.1646	8.45557
Q9ESN0	Protein Niban OS=Rattus norvegicus GN=Fam129a PE=2 SV=2 - [NIBAN_RAT]	0	0					0	2.45	1	1	937	103.401	4.70361
Q9Z2G8	Nucleosome assembly protein 1-like 1 OS=Rattus norvegicus GN=Nap1l1 PE=2 SV=1 - [NP1L1_RAT]	0	381007					1.97453	2.82	1	1	390	45.2849	4.50049
P02683	Neuron-specific protein family member 1 OS=Rattus norvegicus GN=Nsg1 PE=2 SV=2 - [NSG1_RAT]	0	159090					8.98696	5.95	1	3	185	20.9298	6.21436
P49432	Pyruvate dehydrogenase E1 component subunit beta, mitochondrial OS=Rattus norvegicus GN=Pdhb PE=1 SV=2 - [ODPB_RAT]	0	647052					5.7745	8.36	3	3	359	38.957	6.65381
Q9WVS2	Probable tRNA threonylcarbamoyladenosine biosynthesis protein Osgep (Fragment) OS=Rattus norvegicus GN=Osgep PE=2 SV=1 - [OSGEP_RAT]	0	1.46235e+06					9.79308	17.08	5	6	322	34.6274	6.22705
O35263	Platelet-activating factor acetylhydrolase IB subunit gamma OS=Rattus norvegicus GN=Pafah1b3 PE=2 SV=1 - [PA1B3_RAT]	0	163135					2.29692	3.88	1	1	232	25.8473	6.93213
D4A280	Serine/threonine-protein kinase PAK 7 OS=Rattus norvegicus GN=Pak7 PE=1 SV=1 - [PAK7_RAT]	0	0					2.06664	3.06	1	1	718	80.8981	8.20654
Q01062	cGMP-dependent 3',5'-cyclic phosphodiesterase OS=Rattus norvegicus GN=Pde2a PE=1 SV=2 - [PDE2A_RAT]	0	389798					4.26966	1.19	1	2	928	104.597	5.51611
P04785	Protein disulfide-isomerase OS=Rattus norvegicus GN=P4hb PE=1 SV=2 - [PDIA1_RAT]	0	882932					7.6158	11.39	5	5	509	56.9157	4.93213
Q9WVK3	Peroxisomal trans-2-enoyl-CoA reductase OS=Rattus norvegicus GN=Pecr PE=2 SV=1 - [PECR_RAT]	0	0					1.93497	2.97	1	1	303	32.4126	8.68994
Q5I0D7	Xaa-Pro dipeptidase OS=Rattus norvegicus GN=Pepd PE=2 SV=1 - [PEPD_RAT]	0	114416					5.23896	2.24	1	2	492	54.7149	5.94775
B0BN18	Prefoldin subunit 2 OS=Rattus norvegicus GN=Pfdn2 PE=2 SV=1 - [PFD2_RAT]	0	3.74138e+06					12.1749	16.88	2	3	154	16.5696	6.58057
P25113	Phosphoglycerate mutase 1 OS=Rattus norvegicus GN=Pgam1 PE=1 SV=4 - [PGAM1_RAT]	0	3.17851e+06					14.1387	14.57	3	6	254	28.8139	7.18115
Q63921	Prostaglandin G/H synthase 1 OS=Rattus norvegicus GN=Ptgs1 PE=2 SV=2 - [PGH1_RAT]	0	1.32727e+06					1.70227	1.33	1	1	602	68.9878	6.69775
P16617	Phosphoglycerate kinase 1 OS=Rattus norvegicus GN=Pgk1 PE=1 SV=2 - [PGK1_RAT]	0	190058					4.11362	4.08	1	1	417	44.51	7.89893
P38652	Phosphoglucomutase-1 OS=Rattus norvegicus GN=Pgm1 PE=1 SV=2 - [PGM1_RAT]	0	4.03691e+06					1.86033	2.14	1	1	562	61.3646	6.75635
Q5XIU9	Membrane-associated progesterone receptor component 2 OS=Rattus norvegicus GN=Pgrmc2 PE=1 SV=1 - [PGRC2_RAT]	0	1.16076e+06					3.7965	8.76	2	2	217	23.3887	5.26221
Q5XIH7	Prohibitin-2 OS=Rattus norvegicus GN=Phb2 PE=1 SV=1 - [PHB2_RAT]	0	1.24762e+06					4.31772	9.03	3	3	299	33.2919	9.83252
O88377	Phosphatidylinositol 5-phosphate 4-kinase type-2 beta OS=Rattus norvegicus GN=Pip4k2b PE=1 SV=1 - [PI42B_RAT]	0	732341					5.37212	8.89	3	3	416	47.2338	7.51807
Q63433	Serine/threonine-protein kinase N1 OS=Rattus norvegicus GN=Pkn1 PE=1 SV=2 - [PKN1_RAT]	0	8.8108e+06					0	0.74	1	2	946	104.403	6.17627
Q99JE6	1-phosphatidylinositol 4,5-bisphosphate phosphodiesterase beta-3 OS=Rattus norvegicus GN=Plcb3 PE=1 SV=2 - [PLCB3_RAT]	0	2.53958e+06					0	0.89	2	4	1234	139.363	5.8335
P58195	Phospholipid scramblase 1 OS=Rattus norvegicus GN=Plscr1 PE=1 SV=1 - [PLS1_RAT]	0	0					0	2.99	1	1	335	36.6866	4.93213
P62142	Serine/threonine-protein phosphatase PP1-beta catalytic subunit OS=Rattus norvegicus GN=Ppp1cb PE=1 SV=3 - [PP1B_RAT]	0	1.05943e+06					9.06669	12.84	4	6	327	37.1626	6.18896
P63331	Serine/threonine-protein phosphatase 2A catalytic subunit alpha isoform OS=Rattus norvegicus GN=Ppp2ca PE=1 SV=1 - [PP2AA_RAT]	0	2.0487e+06					30.1608	22.01	6	11	309	35.5854	5.5415
P24368	Peptidyl-prolyl cis-trans isomerase B OS=Rattus norvegicus GN=Ppib PE=2 SV=3 - [PPIB_RAT]	0	1.37266e+06					7.52554	22.22	4	4	216	23.7875	9.49561
B2RYF1	Protein phosphatase 1 regulatory subunit 37 OS=Rattus norvegicus GN=Ppp1r37 PE=2 SV=1 - [PPR37_RAT]	0	1.0929e+06					0	1.55	1	1	710	76.8867	5.03369
P62963	Profilin-1 OS=Rattus norvegicus GN=Pfn1 PE=1 SV=2 - [PROF1_RAT]	0	961362					8.59436	18.57	2	3	140	14.9475	8.27979
Q9EPC6	Profilin-2 OS=Rattus norvegicus GN=Pfn2 PE=1 SV=3 - [PROF2_RAT]	0	4.68911e+06					10.2098	19.29	2	3	140	14.9923	6.99072
A1A5S1	Pre-mRNA-processing factor 6 OS=Rattus norvegicus GN=Prpf6 PE=2 SV=1 - [PRP6_RAT]	0	132889					0	1.06	1	1	941	106.697	8.08936
P17220	Proteasome subunit alpha type-2 OS=Rattus norvegicus GN=Psma2 PE=1 SV=3 - [PSA2_RAT]	0	739887					3.0417	5.98	1	1	234	25.9103	7.43018
P18421	Proteasome subunit beta type-1 OS=Rattus norvegicus GN=Psmb1 PE=1 SV=3 - [PSB1_RAT]	0	2.21995e+06					5.94867	9.58	2	3	240	26.4623	7.35693
P40307	Proteasome subunit beta type-2 OS=Rattus norvegicus GN=Psmb2 PE=1 SV=1 - [PSB2_RAT]	0	1.06756e+06					7.11254	7.46	1	2	201	22.8977	7.44482
Q9Z2X3	26S proteasome non-ATPase regulatory subunit 10 OS=Rattus norvegicus GN=Psmd10 PE=2 SV=1 - [PSD10_RAT]	0	1.45986e+06					6.58678	9.52	1	2	231	24.9697	5.92236
P22355	Pulmonary surfactant-associated protein B OS=Rattus norvegicus GN=Sftpb PE=2 SV=1 - [PSPB_RAT]	0	0					1.76816	3.19	1	1	376	41.5623	6.62451
P0C089	Phosphatidylglycerophosphatase and protein-tyrosine phosphatase 1 OS=Rattus norvegicus GN=Ptpmt1 PE=2 SV=1 - [PTPM1_RAT]	0	619173					0	10.88	2	2	193	21.8725	9.5835
Q68A21	Transcriptional activator protein Pur-beta OS=Rattus norvegicus GN=Purb PE=1 SV=3 - [PURB_RAT]	0	624636					6.34665	9.52	2	2	315	33.3976	5.42725
Q6AXT5	Ras-related protein Rab-21 OS=Rattus norvegicus GN=Rab21 PE=2 SV=1 - [RAB21_RAT]	0	2.55431e+06					6.97317	12.11	3	5	223	24.1482	7.94287
Q62901	Arginine-glutamic acid dipeptide repeats protein OS=Rattus norvegicus GN=Rere PE=2 SV=2 - [RERE_RAT]	0	449025					0	0.58	1	1	1559	171.708	7.6792
Q62639	GTP-binding protein Rheb OS=Rattus norvegicus GN=Rheb PE=1 SV=1 - [RHEB_RAT]	0	2.89805e+06					4.92792	12.5	2	2	184	20.4666	5.92236
P81128	Rho GTPase-activating protein 35 OS=Rattus norvegicus GN=Arhgap35 PE=1 SV=2 - [RHG35_RAT]	0	0					0	0.46	1	1	1513	172.27	6.72705
Q920A6	Retinoid-inducible serine carboxypeptidase OS=Rattus norvegicus GN=Scpep1 PE=2 SV=1 - [RISC_RAT]	0	1.09231e+06					3.79317	4.87	2	2	452	51.1418	5.52881
P24049	60S ribosomal protein L17 OS=Rattus norvegicus GN=Rpl17 PE=2 SV=3 - [RL17_RAT]	0	0					1.71246	13.04	2	2	184	21.3834	10.1841
P62832	60S ribosomal protein L23 OS=Rattus norvegicus GN=Rpl23 PE=2 SV=1 - [RL23_RAT]	0	700807					17.779	25	2	6	140	14.8561	10.5063
D4AAZ6	60S ribosomal protein L37a OS=Rattus norvegicus GN=Rpl37a PE=1 SV=1 - [RL37A_RAT]	0	2.08688e+06					3.43964	11.11	1	2	72	8.05724	10.3745
P19944	60S acidic ribosomal protein P1 OS=Rattus norvegicus GN=Rplp1 PE=3 SV=1 - [RLA1_RAT]	0	5.55046e+06					3.50796	5.26	1	2	114	11.4907	4.32275
Q6J2U6	RING finger protein 114 OS=Rattus norvegicus GN=Rnf114 PE=2 SV=1 - [RN114_RAT]	0	656929					1.60136	3.49	1	1	229	25.6473	6.81494
A7VJC2-3	Isoform B0a of Heterogeneous nuclear ribonucleoproteins A2/B1 OS=Rattus norvegicus GN=Hnrnpa2b1 - [ROA2_RAT]	0	1.82717e+06					1.93264	7.31	2	3	301	32.5155	8.71924
B0BNE2	DNA-directed RNA polymerases I, II, and III subunit RPABC1 OS=Rattus norvegicus GN=Polr2e PE=2 SV=1 - [RPAB1_RAT]	0	591343					1.62624	8.57	2	2	210	24.5547	5.94775
Q63486	Ras-related GTP-binding protein A OS=Rattus norvegicus GN=Rraga PE=1 SV=1 - [RRAGA_RAT]	0	491229					7.16909	6.07	2	3	313	36.5426	7.72314
P62859	40S ribosomal protein S28 OS=Rattus norvegicus GN=Rps28 PE=1 SV=1 - [RS28_RAT]	0	1.03635e+06					1.90284	17.39	1	1	69	7.8362	10.6968
Q5I0K8	28S ribosomal protein S7, mitochondrial OS=Rattus norvegicus GN=Mrps7 PE=2 SV=2 - [RT07_RAT]	0	901204					2.8703	4.96	1	1	242	28.1788	10.0229
Q9EPJ3	28S ribosomal protein S26, mitochondrial OS=Rattus norvegicus GN=Mrps26 PE=1 SV=1 - [RT26_RAT]	0	905032					3.16583	5.5	1	1	200	23.3356	9.96436
Q5FVJ0	Protein RUFY3 OS=Rattus norvegicus GN=Rufy3 PE=1 SV=1 - [RUFY3_RAT]	0	143760					1.77823	2.35	1	1	469	52.8732	5.49072
Q5RK27	Solute carrier family 12 member 7 OS=Rattus norvegicus GN=Slc12a7 PE=2 SV=2 - [S12A7_RAT]	0	4.69799e+09					0	0.74	1	1	1083	119.301	6.58057
Q9JHE5	Sodium-coupled neutral amino acid transporter 2 OS=Rattus norvegicus GN=Slc38a2 PE=1 SV=1 - [S38A2_RAT]	0	554936					0	1.59	1	1	504	55.5172	8.1333
Q3B8Q3	Putative sodium-coupled neutral amino acid transporter 9 OS=Rattus norvegicus GN=Slc38a9 PE=2 SV=1 - [S38A9_RAT]	0	1.46791e+07					1.82045	1.79	1	1	559	63.3766	7.50342
P42667	Signal peptidase complex catalytic subunit SEC11A OS=Rattus norvegicus GN=Sec11a PE=2 SV=1 - [SC11A_RAT]	0	1.9608e+06					4.03682	9.5	2	2	179	20.586	9.17334
Q62991	Sec1 family domain-containing protein 1 OS=Rattus norvegicus GN=Scfd1 PE=1 SV=1 - [SCFD1_RAT]	0	220170					8.22303	2.04	1	3	637	72.2171	6.50732
Q923V8	15 kDa selenoprotein OS=Rattus norvegicus GN=Sep15 PE=1 SV=3 - [SEP15_RAT]	0	368038					6.23263	7.41	1	2	162	17.8121	5.35107
Q91Y81	Septin-2 OS=Rattus norvegicus GN=Sept2 PE=1 SV=1 - [SEPT2_RAT]	0	1.30718e+06					3.95071	4.43	1	1	361	41.5663	6.59521
Q63945-2	Isoform 2 of Protein SET OS=Rattus norvegicus GN=Set - [SET_RAT]	0	621003					2.06831	3.97	1	1	277	32.0857	4.22119
Q8CHN6	Sphingosine-1-phosphate lyase 1 OS=Rattus norvegicus GN=Sgpl1 PE=2 SV=1 - [SGPL1_RAT]	0	691079					2.39022	3.87	2	2	568	63.7169	9.17334
Q9JMD2	Scm-like with four MBT domains protein 1 OS=Rattus norvegicus GN=Sfmbt1 PE=2 SV=2 - [SMBT1_RAT]	0	6.45197e+06					0	0.7	1	2	863	97.4441	6.65381
P97690	Structural maintenance of chromosomes protein 3 OS=Rattus norvegicus GN=Smc3 PE=1 SV=1 - [SMC3_RAT]	0	483673					1.77459	1.01	1	1	1191	138.362	7.85498
B0BN70	Small integral membrane protein 7 OS=Rattus norvegicus GN=Smim7 PE=3 SV=1 - [SMIM7_RAT]	0	341782					5.43058	13.33	1	2	75	8.57748	8.17725
Q5RK19	Vacuolar-sorting protein SNF8 OS=Rattus norvegicus GN=Snf8 PE=1 SV=1 - [SNF8_RAT]	0	5.79494e+06					3.16198	4.65	1	1	258	28.8661	6.65381
Q62876	Synaptogyrin-1 OS=Rattus norvegicus GN=Syngr1 PE=2 SV=1 - [SNG1_RAT]	0	908033					6.41189	10.26	2	3	234	25.6523	4.65283
Q5M856	Kinetochore protein Spc25 OS=Rattus norvegicus GN=Spc25 PE=2 SV=1 - [SPC25_RAT]	0	436844					2.69219	4.87	1	1	226	26.1727	8.44092
Q5M7T2	SPRY domain-containing protein 7 OS=Rattus norvegicus GN=Spryd7 PE=2 SV=1 - [SPRY7_RAT]	0	0					2.5343	5.1	1	1	196	21.6666	6.69775
Q5U2T3	SPATS2-like protein OS=Rattus norvegicus GN=Spats2l PE=2 SV=1 - [SPS2L_RAT]	0	5.79019e+06					0	1.08	1	3	558	61.7358	9.68604
Q07984	Translocon-associated protein subunit delta OS=Rattus norvegicus GN=Ssr4 PE=2 SV=1 - [SSRD_RAT]	0	1.57842e+06					13.6906	19.65	3	5	173	18.9675	5.78271
Q4KLK9	RNA polymerase II subunit A C-terminal domain phosphatase SSU72 OS=Rattus norvegicus GN=Ssu72 PE=2 SV=1 - [SSU72_RAT]	0	0					1.66998	5.67	1	1	194	22.53	5.32568
P13668	Stathmin OS=Rattus norvegicus GN=Stmn1 PE=1 SV=2 - [STMN1_RAT]	0	435565					4.95369	6.71	1	2	149	17.2779	5.97314
P13086	Succinyl-CoA ligase [ADP/GDP-forming] subunit alpha, mitochondrial OS=Rattus norvegicus GN=Suclg1 PE=2 SV=2 - [SUCA_RAT]	0	669874					4.42599	9.25	2	3	346	36.125	9.48096
Q5I0H3	Small ubiquitin-related modifier 1 OS=Rattus norvegicus GN=Sumo1 PE=1 SV=1 - [SUMO1_RAT]	0	0					1.65775	11.88	1	1	101	11.5497	5.51611
Q99PK0	Pre-mRNA-splicing factor SYF1 OS=Rattus norvegicus GN=Xab2 PE=2 SV=1 - [SYF1_RAT]	0	2.9654e+06					0	1.05	1	1	855	99.9344	6.22705
Q5I0G4	Glycine--tRNA ligase (Fragment) OS=Rattus norvegicus GN=Gars PE=1 SV=1 - [SYG_RAT]	0	634479					1.8576	1.57	1	1	637	71.9843	6.07471
Q63537-2	Isoform IIb of Synapsin-2 OS=Rattus norvegicus GN=Syn2 - [SYN2_RAT]	0	0					2.09352	2.09	1	1	479	52.4214	7.94287
Q6P799	Serine--tRNA ligase, cytoplasmic OS=Rattus norvegicus GN=Sars PE=1 SV=3 - [SYSC_RAT]	0	1.42058e+06					2.30128	4.69	2	3	512	58.5508	6.18896
Q04462	Valine--tRNA ligase OS=Rattus norvegicus GN=Vars PE=2 SV=2 - [SYVC_RAT]	0	632689					11.4661	3.01	3	5	1264	140.28	7.60596
Q4KM49	Tyrosine--tRNA ligase, cytoplasmic OS=Rattus norvegicus GN=Yars PE=2 SV=3 - [SYYC_RAT]	0	292387					0	1.7	1	1	528	59.078	7.00537
Q5HZA9	Transmembrane protein 126A OS=Rattus norvegicus GN=Tmem126a PE=2 SV=1 - [T126A_RAT]	0	0					4.72146	8.67	2	2	196	21.6436	9.53955
Q5XFX0	Transgelin-2 OS=Rattus norvegicus GN=Tagln2 PE=1 SV=1 - [TAGL2_RAT]	0	1.05371e+06					2.05666	5.53	1	1	199	22.3791	8.25049
P83868	Prostaglandin E synthase 3 OS=Rattus norvegicus GN=Ptges3 PE=1 SV=2 - [TEBP_RAT]	0	704356					3.07015	8.13	1	1	160	18.7094	4.55127
Q64232	Very-long-chain enoyl-CoA reductase OS=Rattus norvegicus GN=Tecr PE=2 SV=1 - [TECR_RAT]	0	1.45063e+06					11.8812	9.09	3	6	308	36.0988	9.5542
P46462	Transitional endoplasmic reticulum ATPase OS=Rattus norvegicus GN=Vcp PE=1 SV=3 - [TERA_RAT]	0	199917					1.74441	1.49	1	1	806	89.2927	5.26221
P24155	Thimet oligopeptidase OS=Rattus norvegicus GN=Thop1 PE=1 SV=4 - [THOP1_RAT]	0	531377					0	1.46	1	1	687	78.3354	5.93506
Q5U2X7	Mitochondrial import inner membrane translocase subunit Tim21 OS=Rattus norvegicus GN=Timm21 PE=2 SV=1 - [TIM21_RAT]	0	661484					1.71031	3.27	1	1	245	27.8587	9.99365
Q5U2T1	TLC domain-containing protein 1 OS=Rattus norvegicus GN=Tlcd1 PE=2 SV=1 - [TLCD1_RAT]	0	7.1397e+06					0	9.31	1	1	247	28.7102	9.45166
Q5FVN2	Transmembrane protein 41B OS=Rattus norvegicus GN=Tmem41b PE=2 SV=1 - [TM41B_RAT]	0	48324.2					1.94157	8.25	2	3	291	32.4903	9.34912
Q66HG5	Transmembrane 9 superfamily member 2 OS=Rattus norvegicus GN=Tm9sf2 PE=2 SV=1 - [TM9S2_RAT]	0	595432					12.8928	9.2	5	9	663	75.5363	7.44482
Q5I0H4	Transmembrane and coiled-coil domains protein 1 OS=Rattus norvegicus GN=Tmco1 PE=2 SV=1 - [TMCO1_RAT]	0	1.62835e+06					1.62437	4.26	1	2	188	21.1612	9.74463
Q63584	Transmembrane emp24 domain-containing protein 10 OS=Rattus norvegicus GN=Tmed10 PE=1 SV=2 - [TMEDA_RAT]	0	1.39199e+06					0	7.31	2	2	219	24.8418	6.41748
A2RUW1	Toll-interacting protein OS=Rattus norvegicus GN=Tollip PE=2 SV=1 - [TOLIP_RAT]	0	2.22282e+06					1.69465	3.28	1	2	274	30.2949	5.17334
Q3KRD5	Mitochondrial import receptor subunit TOM34 OS=Rattus norvegicus GN=Tomm34 PE=2 SV=1 - [TOM34_RAT]	0	4.84247e+06					1.67251	2.91	1	1	309	34.4399	9.12939
B2RYU6	Trafficking protein particle complex subunit 2-like protein OS=Rattus norvegicus GN=Trappc2l PE=2 SV=1 - [TPC2L_RAT]	0	866826					2.19196	6.47	1	1	139	16.0209	6.771
Q2KMM2	Trafficking protein particle complex subunit 1 OS=Rattus norvegicus GN=Trappc1 PE=2 SV=1 - [TPPC1_RAT]	0	1.33021e+06					6.40473	18.62	3	5	145	16.8706	9.15869
Q5XI41	Translocating chain-associated membrane protein 1 OS=Rattus norvegicus GN=Tram1 PE=2 SV=3 - [TRAM1_RAT]	0	1.08956e+06					1.91808	1.87	1	1	374	43.0027	9.67139
Q10836	Thyrotropin-releasing hormone-degrading ectoenzyme OS=Rattus norvegicus GN=Trhde PE=1 SV=1 - [TRHDE_RAT]	0	890849					0	0.68	1	2	1025	117.213	6.96143
Q5M7V1	Tripartite motif-containing 13 OS=Rattus norvegicus GN=Trim13 PE=2 SV=1 - [TRI13_RAT]	0	0					0	1.97	1	1	407	46.7847	5.80811
P12788	Trypsin-4 OS=Rattus norvegicus GN=Try4 PE=2 SV=1 - [TRY4_RAT]	0	87443.4					2.30638	8.1	1	1	247	26.5561	6.82959
P32821	Trypsin V-A OS=Rattus norvegicus PE=2 SV=1 - [TRYA_RAT]	0	0					0	4.47	1	1	246	26.883	5.10986
D4A6D7-2	Isoform 2 of Tetratricopeptide repeat protein 19, mitochondrial OS=Rattus norvegicus GN=Ttc19 - [TTC19_RAT]	0	1.02019e+06					4.6791	5.11	2	2	352	39.8495	6.21436
P0CG51	Polyubiquitin-B OS=Rattus norvegicus GN=Ubb PE=1 SV=1 - [UBB_RAT]	0	1.65196e+06					3.0821	20.98	1	1	305	34.3475	7.53271
Q9JJP9	Ubiquilin-1 OS=Rattus norvegicus GN=Ubqln1 PE=1 SV=1 - [UBQL1_RAT]	0	1.50803e+06					0	2.58	1	1	582	62.0323	4.94482
P17559	Uteroglobin OS=Rattus norvegicus GN=Scgb1a1 PE=1 SV=2 - [UTER_RAT]	0	595316					0	10.42	1	1	96	10.4425	5.0083
P29534	Vascular cell adhesion protein 1 OS=Rattus norvegicus GN=Vcam1 PE=2 SV=1 - [VCAM1_RAT]	0	0					0	1.22	1	1	739	81.1944	5.23682
P85972	Vinculin OS=Rattus norvegicus GN=Vcl PE=1 SV=1 - [VINC_RAT]	0	0					1.72744	0.84	1	1	1066	116.542	6.0874
B5DEN9	Vacuolar protein sorting-associated protein 28 homolog OS=Rattus norvegicus GN=Vps28 PE=2 SV=1 - [VPS28_RAT]	0	448980					2.35152	4.39	1	1	228	26.093	5.52881
P61480	Ribosome biogenesis protein WDR12 OS=Rattus norvegicus GN=Wdr12 PE=2 SV=1 - [WDR12_RAT]	0	282649					1.85629	2.36	1	2	423	47.5328	5.89697
Q8CG07	ATPase WRNIP1 OS=Rattus norvegicus GN=Wrnip1 PE=2 SV=1 - [WRIP1_RAT]	0	0					1.76208	1.82	1	1	660	71.8889	6.17627
O55145	Fractalkine OS=Rattus norvegicus GN=Cx3cl1 PE=2 SV=3 - [X3CL1_RAT]	0	630861					0	2.29	1	1	393	41.9502	7.26904
B0BN52	Mitochondrial carrier homolog 2 (C. elegans) OS=Rattus norvegicus GN=Mtch2 PE=2 SV=1 - [B0BN52_RAT]	0	1.82689e+06					13.5501	16.5	4	7	303	33.506	8.25049
D3ZDA6	Protein Sdk2 OS=Rattus norvegicus GN=Sdk2 PE=4 SV=1 - [D3ZDA6_RAT]	0	0					0	0.83	1	1	2053	225.256	6.85889
Q6P4Z8	Dolichyl-phosphate (UDP-N-acetylglucosamine) N-acetylglucosaminephosphotransferase 1 (GlcNAc-1-P transferase) OS=Rattus norvegicus GN=Dpagt1 PE=2 SV=1 - [Q6P4Z8_RAT]	0	423189					0	1.95	1	1	410	46.4305	8.03076
F1M4A0	Protein Tjp1 OS=Rattus norvegicus GN=Tjp1 PE=4 SV=2 - [F1M4A0_RAT]	0	4.45484e+06					0	0.58	1	1	1733	193.912	6.58057
D3ZVI9	Parkinson disease 7 domain containing 1 (Predicted), isoform CRA_a OS=Rattus norvegicus GN=LOC100911365 PE=4 SV=1 - [D3ZVI9_RAT]	0	118828					1.79868	4.55	1	1	220	23.2487	6.84424
F1M6D0	Protein LOC100360017 OS=Rattus norvegicus GN=LOC100360017 PE=4 SV=2 - [F1M6D0_RAT]	0	1.62083e+06					1.97143	14.4	2	2	125	14.3326	9.49561
D4A190	Eukaryotic translation initiation factor 3, subunit 12 (Predicted), isoform CRA_b OS=Rattus norvegicus GN=Eif3k PE=4 SV=1 - [D4A190_RAT]	0	35233.6					0	14.02	1	1	107	12.351	4.70361
Q5FVC5	Poliovirus receptor-related 2 OS=Rattus norvegicus GN=Pvrl2 PE=2 SV=1 - [Q5FVC5_RAT]	0	4048542					0	0.94	1	2	530	57.2881	4.85596
G3V8A3	Dual oxidase 2 OS=Rattus norvegicus GN=Duox2 PE=4 SV=1 - [G3V8A3_RAT]	0	404689					1.77205	0.66	1	1	1517	171.479	7.56201
D3ZZU4	Protein Tmem160 OS=Rattus norvegicus GN=Tmem160 PE=4 SV=1 - [D3ZZU4_RAT]	0	1.11042e+06					1.95651	6.91	1	1	188	19.575	7.29834
D4AEG3	Peptidylprolyl isomerase (Cyclophilin)-like 4 (Predicted) OS=Rattus norvegicus GN=Ppil4 PE=4 SV=2 - [D4AEG3_RAT]	0	833424					0	2.52	1	1	357	40.6484	4.91943
D3ZUC2	Protein Mov10 OS=Rattus norvegicus GN=Mov10 PE=4 SV=1 - [D3ZUC2_RAT]	0	0					2.19567	1	1	1	1004	113.689	9.1001
B5DF60	Eukaryotic translation initiation factor 1A, Y-linked OS=Rattus norvegicus GN=Eif1ax PE=2 SV=1 - [B5DF60_RAT]	0	2.37569e+06					6.13447	14.58	2	4	144	16.4502	5.23682
D3ZSA9	Protein Nomo1 OS=Rattus norvegicus GN=Nomo1 PE=4 SV=1 - [D3ZSA9_RAT]	0	721791					12.1952	2.97	3	6	1214	133.359	6.07471
D4AAM0	Protein Tnpo3 OS=Rattus norvegicus GN=Tnpo3 PE=2 SV=2 - [D4AAM0_RAT]	0	1.12142e+06					7.33481	3.36	3	4	923	104.117	5.51611
D3ZIN7	Mitochondrial ribosomal protein S23 (Predicted), isoform CRA_b OS=Rattus norvegicus GN=Mrps23 PE=4 SV=1 - [D3ZIN7_RAT]	0	319836					3.62753	9.6	1	1	177	20.3086	9.24658
G3V709	Nicotinate phosphoribosyltransferase OS=Rattus norvegicus GN=Naprt1 PE=4 SV=1 - [G3V709_RAT]	0	4.07618e+07					1.66029	1.67	1	1	538	58.5667	6.354
G3V9P0	26S proteasome non-ATPase regulatory subunit 9 OS=Rattus norvegicus GN=Psmd9 PE=4 SV=1 - [G3V9P0_RAT]	0	2.4325e+06					5.93501	4.5	1	3	222	24.7996	6.88818
A3E0T0	Erythrocyte protein band 4.1-like 3 OS=Rattus norvegicus GN=Epb4.1l3 PE=2 SV=1 - [A3E0T0_RAT]	0	203954					8.71336	1.49	1	3	870	96.8922	5.2876
D3ZD73	Protein Ddx6 OS=Rattus norvegicus GN=Ddx6 PE=3 SV=1 - [D3ZD73_RAT]	0	241640					2.07204	2.28	1	1	483	54.2102	8.66064
D3ZXH7	Protein Thoc4 OS=Rattus norvegicus GN=Thoc4 PE=4 SV=1 - [D3ZXH7_RAT]	0	3.89021e+06					2.33392	5.82	1	2	189	19.9032	9.86182
Q1RP74	Protein LOC100911774 OS=Rattus norvegicus GN=Tbcb PE=2 SV=1 - [Q1RP74_RAT]	0	610956					0	3.69	1	1	244	27.2303	4.99561
B2GV72	Carbonyl reductase 3 OS=Rattus norvegicus GN=Cbr3 PE=2 SV=1 - [B2GV72_RAT]	0	429153					2.86686	4.33	1	1	277	30.8218	6.90283
B5DFI9	Pdk3 protein OS=Rattus norvegicus GN=Pdk3 PE=2 SV=1 - [B5DFI9_RAT]	0	759547					0	1.69	1	1	415	47.9136	8.80713
D3ZUI1	APAF1 interacting protein (Predicted), isoform CRA_b OS=Rattus norvegicus GN=Apip PE=4 SV=2 - [D3ZUI1_RAT]	0	513597					17.1046	27.65	3	6	170	19.2234	6.99072
D4ADB4	CGG triplet repeat binding protein 1 (Predicted) OS=Rattus norvegicus GN=Cggbp1 PE=4 SV=1 - [D4ADB4_RAT]	0	0					4.04132	5.39	1	2	167	18.8086	8.95361
B2RYQ5	Enhancer of rudimentary homolog OS=Rattus norvegicus GN=Erh PE=3 SV=1 - [B2RYQ5_RAT]	0	297648					3.99964	10.58	1	2	104	12.251	5.92236
D4A2G9	Protein Ranbp1 OS=Rattus norvegicus GN=RGD1565297 PE=4 SV=1 - [D4A2G9_RAT]	0	2.0667e+06					4.64343	9.85	2	2	203	23.5817	5.22412
Q925D6	Mitogen-activated protein kinase kinase 6 OS=Rattus norvegicus GN=Map2k6 PE=2 SV=1 - [Q925D6_RAT]	0	674096					1.75696	4.79	2	3	334	37.4202	7.38623
G3V804	Sideroflexin 3 OS=Rattus norvegicus GN=Sfxn3 PE=4 SV=1 - [G3V804_RAT]	0	673287					7.08503	7.79	2	3	321	35.4286	9.68604
G3V8V0	ADP-ribosylation factor-like 2, isoform CRA_a OS=Rattus norvegicus GN=Arl2 PE=3 SV=1 - [G3V8V0_RAT]	0	3.02439e+06					15.8278	11.96	2	5	184	20.8508	5.96045
B2GV01	Metastasis-associated gene family, member 2 OS=Rattus norvegicus GN=Mta2 PE=2 SV=1 - [B2GV01_RAT]	0	933047					1.80088	1.5	1	1	668	74.9126	9.67139
D3ZD23	ATP-binding cassette, sub-family E (OABP), member 1 OS=Rattus norvegicus GN=Abce1 PE=3 SV=1 - [D3ZD23_RAT]	0	264628					11.4042	4.01	2	5	599	67.257	8.33838
D3ZWF5	Protein Eny2 OS=Rattus norvegicus GN=Eny2 PE=4 SV=1 - [D3ZWF5_RAT]	0	2.4635e+06					1.72495	8.91	1	1	101	11.5213	9.33447
Q3B7V5	Protein Rab2b OS=Rattus norvegicus GN=Rab2b PE=2 SV=1 - [Q3B7V5_RAT]	0	993008					10.659	20	3	4	215	24.07	6.78564
D4AE56	Prostaglandin E synthase 2 (Predicted), isoform CRA_b OS=Rattus norvegicus GN=Ptges2 PE=4 SV=1 - [D4AE56_RAT]	0	405012					3.78214	5.99	2	2	384	43.4242	9.24658
D3ZD48	Protein Rab11fip2 OS=Rattus norvegicus GN=Rab11fip2 PE=2 SV=2 - [D3ZD48_RAT]	0	2.61903e+06					2.18847	1.76	1	1	512	58.1716	9.42236
D3ZSC2	Protein Pdcd2l OS=Rattus norvegicus GN=Pdcd2l PE=4 SV=1 - [D3ZSC2_RAT]	0	426388					1.72313	2.5	1	1	360	39.7071	4.89404
G3V9Y9	Adaptor-related protein complex 3, sigma 1 subunit (Predicted), isoform CRA_a OS=Rattus norvegicus GN=Ap3s1 PE=4 SV=1 - [G3V9Y9_RAT]	0	892612					3.03217	9.55	1	1	157	18.1231	5.08447
D4A3V5	Protein Cgnl1 OS=Rattus norvegicus GN=Cgnl1 PE=4 SV=1 - [D4A3V5_RAT]	0	184548					1.72991	0.77	1	1	1292	147.849	5.5542
D4A565	NADH dehydrogenase (Ubiquinone) 1 beta subcomplex, 5 (Predicted), isoform CRA_b OS=Rattus norvegicus GN=Ndufb5 PE=4 SV=1 - [D4A565_RAT]	0	1.57859e+06					9.31314	12.7	2	4	189	21.6505	9.46631
D4AEH9	Amylo-1, 6-glucosidase, 4-alpha-glucanotransferase (Glycogen debranching enzyme, glycogen storage disease type III) (Predicted), isoform CRA_a OS=Rattus norvegicus GN=Agl PE=4 SV=1 - [D4AEH9_RAT]	0	559632					8.78268	2.35	3	3	1532	174.22	6.7417
Q68FS9	COMM domain containing 10 OS=Rattus norvegicus GN=Commd10 PE=2 SV=1 - [Q68FS9_RAT]	0	962010					2.12467	11.88	2	2	202	22.8121	6.43018
Q32Q54	Protein Uqcc OS=Rattus norvegicus GN=Uqcc PE=2 SV=1 - [Q32Q54_RAT]	0	478117					16.2784	3.01	1	7	299	34.5234	8.76318
G3V7I8	RCG57812, isoform CRA_b OS=Rattus norvegicus GN=Slk PE=4 SV=1 - [G3V7I8_RAT]	0	9.95168e+06					0	0.67	1	1	1203	137.556	5.021
Q4V8C0	DNA primase large subunit OS=Rattus norvegicus GN=Prim2 PE=2 SV=1 - [Q4V8C0_RAT]	0	69067.7					2.42628	2.27	1	1	484	55.8334	8.45557
D4A7L6	Protein Rpia OS=Rattus norvegicus GN=Rpia PE=3 SV=1 - [D4A7L6_RAT]	0	3.48161e+06					0	2.64	1	1	303	32.4517	8.01611
G3V8M5	Serine/threonine-protein phosphatase OS=Rattus norvegicus GN=Ppp4c PE=3 SV=1 - [G3V8M5_RAT]	0	465105					8.10606	8.79	2	3	307	35.0574	5.05908
Q6MGC4	H2-K region expressed gene 2, rat orthologue OS=Rattus norvegicus GN=Pfdn6 PE=4 SV=1 - [Q6MGC4_RAT]	0	1.30424e+06					9.10004	25.2	3	4	127	14.4888	8.88037
B0BN51	Small nuclear ribonucleoprotein-associated protein OS=Rattus norvegicus GN=Snrpb PE=2 SV=1 - [B0BN51_RAT]	0	4.86705e+06					3.74059	9.52	3	3	231	23.6402	10.9019
D3Z9E1	Elastin microfibril interfacer 1 (Predicted), isoform CRA_b OS=Rattus norvegicus GN=Emilin1 PE=4 SV=1 - [D3Z9E1_RAT]	0	0					1.9335	1.44	1	1	900	94.4468	4.98291
D3ZTV7	Ash2 (Absent, small, or homeotic)-like (Drosophila) (Predicted) OS=Rattus norvegicus GN=Ash2l PE=4 SV=1 - [D3ZTV7_RAT]	0	215422					3.90265	1.61	1	2	623	68.1852	5.69385
G3V6K0	COMM domain containing 5, isoform CRA_a OS=Rattus norvegicus GN=Commd5 PE=4 SV=1 - [G3V6K0_RAT]	0	216991					3.9557	7.14	1	1	224	24.5099	7.18115
Q6AYE7	Interferon-induced protein with tetratricopeptide repeats 3 OS=Rattus norvegicus GN=Ifit3 PE=2 SV=1 - [Q6AYE7_RAT]	0	4.37161e+06					1.69705	1.7	1	1	411	48.0246	5.56689
D4A676	GrpE protein homolog OS=Rattus norvegicus GN=Grpel2 PE=3 SV=1 - [D4A676_RAT]	0	261031					0	4.02	1	1	224	24.8829	7.13721
Q568Z8	Ddx17 protein OS=Rattus norvegicus GN=Ddx17 PE=2 SV=1 - [Q568Z8_RAT]	0	414595					7.20249	5.22	1	2	268	28.8588	9.02686
A0JPL2	Casein kinase 1, alpha 1, isoform CRA_d OS=Rattus norvegicus GN=Csnk1a1 PE=2 SV=1 - [A0JPL2_RAT]	0	255829					20.2827	6.23	1	5	337	38.8899	9.56885
B5DFN4	Prefoldin 5 (Predicted), isoform CRA_a OS=Rattus norvegicus GN=Pfdn5 PE=2 SV=1 - [B5DFN4_RAT]	0	2.76139e+06					10.2999	29.22	4	4	154	17.315	6.32861
D3Z9I4	Protein Gins3 OS=Rattus norvegicus GN=Gins3 PE=4 SV=1 - [D3Z9I4_RAT]	0	99301.7					1.72286	3.7	1	1	216	24.4223	5.31299
D3ZAZ0	Protein Eif3m OS=Rattus norvegicus GN=Eif3m PE=4 SV=1 - [D3ZAZ0_RAT]	0	2.10132e+06					2.02236	2.67	1	1	374	42.4899	5.74463
D3ZLL8	Protein LOC100909878 OS=Rattus norvegicus GN=Rps15a-ps7 PE=3 SV=1 - [D3ZLL8_RAT]	0	2.17585e+06					15.4045	34.62	5	11	130	14.8449	10.1255
D4A576	Protein Abcd4 OS=Rattus norvegicus GN=Abcd4 PE=3 SV=1 - [D4A576_RAT]	0	100421					1.62254	1.32	1	1	606	68.6416	6.69775
D4ACM2	MAD2 (Mitotic arrest deficient, homolog)-like 1 (Yeast) (Predicted), isoform CRA_a OS=Rattus norvegicus GN=Mad2l1 PE=4 SV=1 - [D4ACM2_RAT]	0	1.6575e+06					1.63114	4.88	1	2	205	23.5242	5.19873
D4A914	5'-3' exoribonuclease 2 (Predicted), isoform CRA_c OS=Rattus norvegicus GN=Xrn2 PE=4 SV=2 - [D4A914_RAT]	0	60411.3					2.48905	2.14	1	1	561	63.8279	8.85107
B0BMV4	Protein Yif1a OS=Rattus norvegicus GN=Yif1 PE=2 SV=1 - [B0BMV4_RAT]	0	301947					5.83567	5.12	1	2	293	32.0286	9.08545
B5DF91	ELAV (Embryonic lethal, abnormal vision, Drosophila)-like 1 (Hu antigen R) OS=Rattus norvegicus GN=Elavl1 PE=2 SV=1 - [B5DF91_RAT]	0	448350					2.75767	3.37	1	1	326	36.1461	9.0415
D3ZES2	Protein Trappc6b OS=Rattus norvegicus GN=Trappc6b PE=4 SV=1 - [D3ZES2_RAT]	0	1.34548e+06					3.54734	11.39	2	2	158	17.9653	8.67529
D3ZLK9	ATP-dependent (S)-NAD(P)H-hydrate dehydratase OS=Rattus norvegicus GN=Carkd PE=3 SV=1 - [D3ZLK9_RAT]	0	647255					6.04293	3.98	1	2	327	34.9401	7.94287
G3V8V4	Longevity assurance homolog 2 (S. cerevisiae) OS=Rattus norvegicus GN=Cers2 PE=3 SV=1 - [G3V8V4_RAT]	0	461397					2.11123	2.37	1	1	380	44.9222	8.74854
Q5BK16	Protein Trex1 OS=Rattus norvegicus GN=Trex1 PE=2 SV=1 - [Q5BK16_RAT]	0	0					0	3.16	1	2	316	33.5822	7.7085
G3V9Z4	Putative L-aspartate dehydrogenase OS=Rattus norvegicus GN=Aspdh PE=4 SV=1 - [G3V9Z4_RAT]	0	0					1.77532	3.83	1	1	287	30.3697	6.84424
F7FHZ5	KDEL (Lys-Asp-Glu-Leu) containing 1, isoform CRA_b OS=Rattus norvegicus GN=Kdelc1 PE=4 SV=1 - [F7FHZ5_RAT]	0	294143					3.91227	5.67	1	1	282	32.2685	8.22119
D3ZNQ6	Protein Ube2m OS=Rattus norvegicus GN=Ube2m PE=3 SV=1 - [D3ZNQ6_RAT]	0	907360					3.16191	5.46	1	1	183	20.8866	7.69385
B5DEG8	LOC685144 protein OS=Rattus norvegicus GN=Sec24c PE=2 SV=1 - [B5DEG8_RAT]	0	204017					3.69638	2.1	2	3	1095	118.448	7.06396
D4A7F5	Kelch repeat and BTB (POZ) domain containing 3 (Predicted), isoform CRA_a OS=Rattus norvegicus GN=Kbtbd3 PE=4 SV=1 - [D4A7F5_RAT]	0	3.15071e+06					0	1.15	1	2	607	69.4581	5.87158
F7DLY1	EPS8-like 2 (Predicted), isoform CRA_d OS=Rattus norvegicus GN=Eps8l2 PE=4 SV=1 - [F7DLY1_RAT]	0	748144					1.91517	1.75	1	1	684	77.452	6.90283
D3ZTW7	ATP synthase mitochondrial F1 complex assembly factor 2 (Predicted), isoform CRA_c OS=Rattus norvegicus GN=Atpaf2 PE=4 SV=1 - [D3ZTW7_RAT]	0	385262					2.49946	4.03	1	1	298	34.1706	6.55127
D3ZTD1	Mitogen-activated protein kinase kinase kinase 14 (Predicted), isoform CRA_a OS=Rattus norvegicus GN=Map3k14 PE=3 SV=1 - [D3ZTD1_RAT]	0	0					2.34184	1.49	1	1	942	103.519	7.76709
B1WC73	ADP-ribosylation factor-like 6 (Predicted), isoform CRA_a OS=Rattus norvegicus GN=Arl6 PE=2 SV=1 - [B1WC73_RAT]	0	655489					3.98801	9.14	2	3	186	20.9551	8.25049
D4A0E8	Protein Prmt5 OS=Rattus norvegicus GN=Prmt5 PE=4 SV=1 - [D4A0E8_RAT]	0	519264					2.38775	5.65	3	3	637	72.6485	6.26514
B2RZD5	Protein LOC688712 OS=Rattus norvegicus GN=Rpl22l1 PE=2 SV=1 - [B2RZD5_RAT]	0	2.40274e+06					8.03499	19.67	2	3	122	14.4586	9.45166
D4A7L4	NADH dehydrogenase (Ubiquinone) 1 beta subcomplex, 11 (Predicted) OS=Rattus norvegicus GN=Ndufb11 PE=4 SV=1 - [D4A7L4_RAT]	0	1.65166e+06					2.01186	6.62	1	1	151	17.6229	5.23682
B0BNB9	HtrA serine peptidase 2 OS=Rattus norvegicus GN=Htra2 PE=2 SV=1 - [B0BNB9_RAT]	0	68306.4					2.51586	3.28	1	1	458	49.064	9.49561
D4A463	Protein Tpgs1 OS=Rattus norvegicus GN=Tpgs1 PE=4 SV=1 - [D4A463_RAT]	0	618942					5.57937	4.62	1	2	303	32.5001	8.93896
Q6YDN8	BWK-1 OS=Rattus norvegicus GN=Bwk1 PE=2 SV=1 - [Q6YDN8_RAT]	0	186061					0	3.51	1	1	228	26.7617	4.97021
B2RZ98	Ncf4 protein OS=Rattus norvegicus GN=Ncf4 PE=2 SV=1 - [B2RZ98_RAT]	0	0					2.0694	5.9	1	1	339	38.7219	5.90967
O70425	Myogenin OS=Rattus norvegicus GN=Myog PE=2 SV=1 - [O70425_RAT]	0	1.00363e+07					1.66879	4.02	1	1	224	25.1275	6.01123
D3ZXL8	Protein Nobox OS=Rattus norvegicus GN=Nobox PE=3 SV=1 - [D3ZXL8_RAT]	0	4.44045e+06					0	1.15	1	1	524	56.9926	6.07471
B1WC02	Ctps protein OS=Rattus norvegicus GN=Ctps PE=2 SV=1 - [B1WC02_RAT]	0	585457					0	1.69	1	1	591	66.5981	6.58057
D4A1J1	Protein Arhgef3 OS=Rattus norvegicus GN=Arhgef3 PE=4 SV=1 - [D4A1J1_RAT]	0	1.08709e+06					0	1.34	1	1	524	59.6083	6.25244
Q8R3Z7	EH-domain containing 4 OS=Rattus norvegicus GN=Ehd4 PE=2 SV=1 - [Q8R3Z7_RAT]	0	802095					1.73565	1.48	1	1	541	61.4285	6.75635
Q5XIU4	B-cell receptor-associated protein 29 OS=Rattus norvegicus GN=Bcap29 PE=2 SV=1 - [Q5XIU4_RAT]	0	3.34352e+06					1.97418	3.73	1	1	241	28.2163	9.65674
B1H239	Leucine rich repeat containing 49 (Predicted) OS=Rattus norvegicus GN=Lrrc49 PE=2 SV=1 - [B1H239_RAT]	0	85551.6					2.28245	2.92	1	1	686	78.888	8.08936
D4A6X4	Acylphosphatase OS=Rattus norvegicus GN=Acyp1 PE=3 SV=1 - [D4A6X4_RAT]	0	1.41252e+06					3.20725	13.13	1	1	99	11.3048	9.30518
B2RZ66	Protein Srp19 OS=Rattus norvegicus GN=Srp19 PE=2 SV=1 - [B2RZ66_RAT]	0	312030					1.94435	10.42	1	1	144	16.1274	9.84717
D3ZAA0	PRA1 domain family 2 (Predicted) OS=Rattus norvegicus GN=Praf2 PE=4 SV=2 - [D3ZAA0_RAT]	0	1.12114e+06					1.97002	6.18	1	1	178	19.4217	9.39307
M0R7P0	Protein LOC100912027 OS=Rattus norvegicus GN=LOC100912027 PE=4 SV=1 - [M0R7P0_RAT]	0	4.22046e+06					2.08311	22.06	2	3	136	15.8117	10.5649
G3V861	Cytochrome P450, family 26, subfamily A, polypeptide 1 OS=Rattus norvegicus GN=Cyp26a1 PE=3 SV=1 - [G3V861_RAT]	0	0					0	3.42	1	1	497	56.1422	8.60205
B2RZC6	Ilf2 protein OS=Rattus norvegicus GN=Ilf2 PE=2 SV=1 - [B2RZC6_RAT]	0	258999					5.22035	3.59	1	2	390	43.0352	5.26221
Q5U2Y4	Neural cell expressed, developmentally down-regulated 9 OS=Rattus norvegicus GN=Nedd9 PE=2 SV=1 - [Q5U2Y4_RAT]	0	311775					0	0.96	1	1	833	92.9214	6.48096
D3ZXF8	Mitochondrial ribosomal protein L43 (Predicted), isoform CRA_a OS=Rattus norvegicus GN=Mrpl43 PE=4 SV=2 - [D3ZXF8_RAT]	0	818137					1.97524	5.98	1	1	117	13.1588	10.9604
Q6MG10	Mitochondrial ribosomal protein S18B OS=Rattus norvegicus GN=Mrps18b PE=2 SV=1 - [Q6MG10_RAT]	0	424385					1.90998	3.95	1	1	253	28.6635	8.90967
D3ZZC1	Protein Txndc5 OS=Rattus norvegicus GN=Txndc5 PE=3 SV=1 - [D3ZZC1_RAT]	0	273541					4.3342	3.84	1	1	417	46.324	5.88428
B0BNJ4	Ethylmalonic encephalopathy 1 OS=Rattus norvegicus GN=Ethe1 PE=2 SV=1 - [B0BNJ4_RAT]	0	870189					0	7.87	2	2	254	27.659	7.06396
G3V8Q9	Adenomatosis polyposis coli, isoform CRA_a OS=Rattus norvegicus GN=Apc PE=4 SV=1 - [G3V8Q9_RAT]	0	6.18046e+06					0	0.21	1	1	2842	310.316	7.37158
D3ZQI1	Glutathione peroxidase OS=Rattus norvegicus GN=Gpx7 PE=3 SV=1 - [D3ZQI1_RAT]	0	0					1.64022	3.76	1	1	186	21.0757	7.85498
B1WC32	RCG53609 OS=Rattus norvegicus GN=Uba2 PE=2 SV=1 - [B1WC32_RAT]	0	512097					1.69615	1.56	1	1	639	70.7259	5.24951
Q5U2R9	Protein Scfd2 OS=Rattus norvegicus GN=Scfd2 PE=2 SV=1 - [Q5U2R9_RAT]	0	354723					2.38923	3.36	2	2	684	74.747	6.771
Q6TXI8	LRRGT00011 OS=Rattus norvegicus GN=Phf14 PE=2 SV=1 - [Q6TXI8_RAT]	0	631827					1.84707	1.77	1	1	566	62.5739	4.69092
Q5M7T6	ATPase, H+ transporting, lysosomal 38kDa, V0 subunit d1 OS=Rattus norvegicus GN=Atp6v0d1 PE=2 SV=1 - [Q5M7T6_RAT]	0	582865					2.30273	3.7	1	1	351	40.2752	4.99561
B1WBR1	Golgi reassembly-stacking protein 1 OS=Rattus norvegicus GN=Gorasp1 PE=2 SV=1 - [B1WBR1_RAT]	0	1.62049e+06					0	2.24	1	1	446	47.0227	4.60205
D3ZUJ5	Deoxythymidylate kinase (Predicted), isoform CRA_b OS=Rattus norvegicus GN=Dtymk PE=3 SV=1 - [D3ZUJ5_RAT]	0	0					1.71688	4.72	1	1	212	23.9585	5.93506
M0R9X4	Protein Zzz3 OS=Rattus norvegicus GN=Zzz3 PE=4 SV=1 - [M0R9X4_RAT]	0	0					2.10951	5.65	1	1	283	32.892	6.52197
M0RBK9	Protein Pnkd OS=Rattus norvegicus GN=Pnkd PE=4 SV=1 - [M0RBK9_RAT]	0	84399.6					2.48078	7.75	1	1	142	15.5881	10.272
D4A062	Protein Slitrk3 OS=Rattus norvegicus GN=Slitrk3 PE=4 SV=1 - [D4A062_RAT]	0	3.17759e+06					2.03598	1.84	1	1	979	109.167	7.47412
B2RZ68	Protein Dcaf7 OS=Rattus norvegicus GN=Dcaf7 PE=2 SV=1 - [B2RZ68_RAT]	0	1.57522e+06					8.54276	5.85	2	4	342	38.9011	5.51611
D3ZZB2	Protein Pex1 OS=Rattus norvegicus GN=Pex1 PE=3 SV=1 - [D3ZZB2_RAT]	0	109669					0	0.86	1	1	1283	141.312	6.32861
D4A434	Protein Rnaseh2c OS=Rattus norvegicus GN=Rnaseh2c PE=4 SV=1 - [D4A434_RAT]	0	416264					5.05181	6.02	1	2	166	17.8631	5.56689
Q5XIC6	Proteasome (Prosome, macropain) 26S subunit, non-ATPase, 12 OS=Rattus norvegicus GN=Psmd12 PE=2 SV=1 - [Q5XIC6_RAT]	0	2.15853e+06					6.30238	3.29	2	4	456	52.9025	7.35693
D3ZVT6	Ankyrin repeat and SOCS box-containing 7 (Predicted) OS=Rattus norvegicus GN=Asb7 PE=4 SV=1 - [D3ZVT6_RAT]	0	1.02887e+06					1.60444	7.23	2	2	318	35.9625	8.29443
Q4V8H5	Aspartyl aminopeptidase OS=Rattus norvegicus GN=Dnpep PE=2 SV=1 - [Q4V8H5_RAT]	0	1.17806e+06					14.3269	9.68	4	6	475	52.5219	7.25439
A9UMV9	Ndufa7 protein OS=Rattus norvegicus GN=Ndufa7 PE=4 SV=1 - [A9UMV9_RAT]	0	888883					5.27109	8.04	1	2	112	12.4926	10.4771
D4A8B1	Bardet-Biedl syndrome 4 homolog (Human) (Predicted) OS=Rattus norvegicus GN=Bbs4 PE=4 SV=1 - [D4A8B1_RAT]	0	381147					2.64155	2.12	1	1	520	58.2301	7.82568
Q3KR55	Protein LOC687575 OS=Rattus norvegicus GN=LOC687575 PE=2 SV=1 - [Q3KR55_RAT]	0	63303.2					1.87019	5.44	1	1	239	27.7974	8.80713
Q499V0	COMM domain containing 7 OS=Rattus norvegicus GN=Commd7 PE=2 SV=1 - [Q499V0_RAT]	0	690497					3.8902	10	2	2	200	22.5807	6.32861
Q6AYS3	Protective protein for beta-galactosidase OS=Rattus norvegicus GN=Ctsa PE=2 SV=1 - [Q6AYS3_RAT]	0	994392					3.31214	2.19	1	1	456	51.183	5.23682
D4AEH3	Proteasome (Prosome, macropain) 26S subunit, non-ATPase, 7 (Predicted) OS=Rattus norvegicus GN=Psmd7 PE=4 SV=1 - [D4AEH3_RAT]	0	1.32595e+06					2.4444	3.13	1	1	320	36.4692	6.81494
B2GUZ3	Mthfd1l protein OS=Rattus norvegicus GN=Mthfd1l PE=2 SV=1 - [B2GUZ3_RAT]	0	402647					8.46736	3.17	2	3	977	105.776	7.50342
D4A465	Protein Lamtor2 OS=Rattus norvegicus GN=Lamtor2 PE=4 SV=1 - [D4A465_RAT]	0	846213					2.45465	9.6	1	1	125	13.4718	5.40186
D4A414	COX15 homolog, cytochrome c oxidase assembly protein (Yeast), isoform CRA_a OS=Rattus norvegicus GN=Cox15 PE=3 SV=1 - [D4A414_RAT]	0	1.29296e+06					3.77388	1.93	1	2	414	45.8843	9.83252
D3ZB30	Polypyrimidine tract binding protein 1, isoform CRA_c OS=Rattus norvegicus GN=Ptbp1 PE=4 SV=1 - [D3ZB30_RAT]	0	1.33887e+06					2.40158	3.4	2	3	530	56.9004	9.17334
D3ZU83	ERGIC and golgi 3 (Predicted) OS=Rattus norvegicus GN=Ergic3 PE=4 SV=1 - [D3ZU83_RAT]	0	1.12108e+06					1.7165	2.09	1	1	383	43.1956	6.37939
G3V7J0	Aldehyde dehydrogenase family 6, subfamily A1, isoform CRA_b OS=Rattus norvegicus GN=Aldh6a1 PE=3 SV=1 - [G3V7J0_RAT]	0	388739					3.67418	2.06	1	2	535	57.7105	8.17725
D3ZIF5	Adaptor-related protein complex 3, beta 1 subunit (Predicted), isoform CRA_b OS=Rattus norvegicus GN=Ap3b1 PE=4 SV=1 - [D3ZIF5_RAT]	0	503901					4.46719	2.52	2	2	794	87.7108	5.77002
B2GUY5	Armc7 protein OS=Rattus norvegicus GN=Armc7 PE=2 SV=1 - [B2GUY5_RAT]	0	168420					2.03787	6.57	1	1	198	21.7941	5.14795
Q7TP78	Aa2-258 OS=Rattus norvegicus GN=Ndufa8 PE=2 SV=1 - [Q7TP78_RAT]	0	853699					5.65928	5.82	1	2	189	21.952	8.104
B1WBU7	Protein Tmem50a OS=Rattus norvegicus GN=Tmem50a PE=2 SV=1 - [B1WBU7_RAT]	0	1.74748e+06					1.60148	5.73	1	1	157	17.3815	5.84619
D3ZGY1	Protein Wibg OS=Rattus norvegicus GN=Wibg PE=4 SV=1 - [D3ZGY1_RAT]	0	267561					1.84394	3.94	1	1	203	22.713	9.64209
Q7TMZ5	ADP-ribosylation factor-like 6 interacting protein 1 OS=Rattus norvegicus GN=Arl6ip1 PE=2 SV=1 - [Q7TMZ5_RAT]	0	989620					1.79441	4.93	1	1	203	23.4355	9.31982
D3ZFQ8	Cytochrome c-1 (Predicted), isoform CRA_b OS=Rattus norvegicus GN=Cyc1 PE=4 SV=2 - [D3ZFQ8_RAT]	0	1.49565e+06					4.79717	5.53	1	3	217	23.006	10.272
G3V7W1	Programmed cell death 6 (Predicted), isoform CRA_a OS=Rattus norvegicus GN=Pdcd6 PE=4 SV=1 - [G3V7W1_RAT]	0	1.16387e+06					3.96918	10.47	2	3	191	21.8908	5.64307
B0BMV9	Proteasome (Prosome, macropain) 26S subunit, non-ATPase, 10, isoform CRA_c OS=Rattus norvegicus GN=Psmd10 PE=2 SV=1 - [B0BMV9_RAT]	0	1.90942e+06					7.29569	16.94	1	4	124	13.3757	6.04932
D3ZW89	Calcium binding protein 5 (Predicted), isoform CRA_b OS=Rattus norvegicus GN=Cabp5 PE=4 SV=1 - [D3ZW89_RAT]	0	0					2.01236	10.98	1	1	173	19.7446	4.50049
A1A5Q1	Parp9 protein OS=Rattus norvegicus GN=Parp9 PE=2 SV=1 - [A1A5Q1_RAT]	0	0					2.15189	1.45	1	1	830	92.1557	6.93213
B3DMA5	CCR4-NOT transcription complex, subunit 7 OS=Rattus norvegicus GN=Cnot7 PE=2 SV=1 - [B3DMA5_RAT]	0	803241					4.43382	7.37	2	2	285	32.6969	4.84326
F1LSW9	Ubiquitin carboxyl-terminal hydrolase (Fragment) OS=Rattus norvegicus GN=LOC100912059 PE=2 SV=2 - [F1LSW9_RAT]	0	0					0	3.56	1	1	365	42.252	6.59521
B2GV08	Adaptor-related protein complex 1, sigma 2 subunit (Predicted), isoform CRA_a OS=Rattus norvegicus GN=Ap1s2 PE=2 SV=1 - [B2GV08_RAT]	0	606521					2.12959	10.19	2	2	157	18.6028	5.46533
D3ZZR9	Peptidyl-prolyl cis-trans isomerase OS=Rattus norvegicus GN=Fkbp2 PE=4 SV=1 - [D3ZZR9_RAT]	0	3.16624e+06					1.93237	8.57	1	2	140	15.3782	8.88037
Q4V884	CDC16 cell division cycle 16 homolog (S. cerevisiae) OS=Rattus norvegicus GN=Cdc16 PE=2 SV=1 - [Q4V884_RAT]	0	2.79361e+06					1.96205	1.29	1	1	620	71.3153	5.70654
Q9JKT0	SH3-domain GRB2-like 3 OS=Rattus norvegicus GN=Sh3gl3 PE=2 SV=1 - [Q9JKT0_RAT]	0	440398					2.15412	2.88	1	1	312	35.292	5.03369
D3ZCM4	DnaJ (Hsp40) homolog, subfamily C, member 15 (Predicted), isoform CRA_a OS=Rattus norvegicus GN=Dnajc15 PE=4 SV=1 - [D3ZCM4_RAT]	0	219389					2.3986	9.4	1	1	149	15.9814	10.0376
D3ZB89	Protein RGD1565989 OS=Rattus norvegicus GN=RGD1565989 PE=4 SV=1 - [D3ZB89_RAT]	0	0					0	2.55	1	1	274	31.8844	8.26514
D3ZUM2	Protein Sarm1 OS=Rattus norvegicus GN=Sarm1 PE=4 SV=1 - [D3ZUM2_RAT]	0	0					2.45717	1.66	1	1	724	79.6381	6.16357
B0BN66	Protein Sapcd2 OS=Rattus norvegicus GN=LOC680531 PE=2 SV=1 - [B0BN66_RAT]	0	5.54519e+06					0	1.55	1	1	387	42.46	8.74854
D4A1B8	Protein Dctn3 OS=Rattus norvegicus GN=Dctn3 PE=4 SV=1 - [D4A1B8_RAT]	0	1.12691e+06					5.70089	15.05	3	4	186	21.0993	5.70654
B5DF55	Protein Stam OS=Rattus norvegicus GN=Stam PE=2 SV=1 - [B5DF55_RAT]	0	706909					9.16545	4.02	2	4	547	59.5544	4.85596
D4ACF4	Neural retina leucine zipper gene (Predicted) OS=Rattus norvegicus GN=Nrl PE=4 SV=1 - [D4ACF4_RAT]	0	3.08368e+06					1.91264	3.78	1	1	238	26.0862	7.34229
B2RYS6	Phosphoribosyl transferase domain containing 1 OS=Rattus norvegicus GN=Prtfdc1 PE=2 SV=1 - [B2RYS6_RAT]	0	732405					2.15237	4.44	1	1	225	25.541	6.30322
Q5RK25	Phosphomannomutase 1 OS=Rattus norvegicus GN=Pmm1 PE=2 SV=1 - [Q5RK25_RAT]	0	308505					2.60119	5.34	1	1	262	29.67	5.59229
Q5XI77	Annexin OS=Rattus norvegicus GN=Anxa11 PE=2 SV=1 - [Q5XI77_RAT]	0	378813					5.88222	6.56	3	4	503	54.1258	7.6499
B0BNE3	Protein Trappc5 OS=Rattus norvegicus GN=Trappc5 PE=2 SV=1 - [B0BNE3_RAT]	0	586649					5.31859	13.3	2	2	188	20.7822	9.65674
G3V765	Envoplakin (Predicted) OS=Rattus norvegicus GN=Evpl PE=4 SV=1 - [G3V765_RAT]	0	0					0	0.79	2	2	2029	230.971	6.58057
D4A994	Protein Emc1 OS=Rattus norvegicus GN=Emc1 PE=4 SV=1 - [D4A994_RAT]	0	856043					4.91008	2.22	2	2	993	111.115	7.31299
Q6IN03	Rab28 protein OS=Rattus norvegicus GN=Rab28 PE=2 SV=1 - [Q6IN03_RAT]	0	491443					1.90684	4.09	1	1	220	24.7055	5.46533
D4A3K7	Protein Frmpd4 OS=Rattus norvegicus GN=Frmpd4 PE=4 SV=1 - [D4A3K7_RAT]	0	0					0	0.53	1	1	1705	186.975	5.33838
D4AED2	Protein Dda1 OS=Rattus norvegicus GN=Dda1 PE=4 SV=1 - [D4AED2_RAT]	0	244962					2.25596	11.76	1	1	102	11.7459	8.67529
B2RYW7	Protein Srp14 OS=Rattus norvegicus GN=Srp14 PE=4 SV=1 - [B2RYW7_RAT]	0	1.1747e+06					5.49315	10.91	1	2	110	12.5018	10.1694
D3ZT01	Protein Cog2 OS=Rattus norvegicus GN=Cog2 PE=4 SV=1 - [D3ZT01_RAT]	0	240287					6.11409	3.56	2	3	730	81.7533	6.59521
B5DF95	Family with sequence similarity 164, member A OS=Rattus norvegicus GN=Fam164a PE=2 SV=1 - [B5DF95_RAT]	0	1.38e+06					2.06	3.09	1	1	324	35.187	9.86182
D4A9L2	Protein Srsf1 OS=Rattus norvegicus GN=Srsf1 PE=4 SV=1 - [D4A9L2_RAT]	0	1.27249e+06					12.7279	14.52	3	5	248	27.7278	10.3599
A7XYB9	NADH-ubiquinone oxidoreductase chain 4 OS=Rattus norvegicus GN=Mt-nd4 PE=3 SV=1 - [A7XYB9_RAT]	0	871511					1.79142	2.18	1	1	459	51.7375	9.40771
D3ZGR7	Protein LOC100910447 OS=Rattus norvegicus GN=RGD1564093 PE=4 SV=1 - [D3ZGR7_RAT]	0	466269					1.80467	5.2	1	1	173	18.4613	9.67139
D4A3U2	Protein Tspan18 OS=Rattus norvegicus GN=Tspan18 PE=4 SV=1 - [D4A3U2_RAT]	0	669116					0	4.44	1	1	248	27.7681	5.21143
Q499S6	Cathepsin F OS=Rattus norvegicus GN=Ctsf PE=2 SV=1 - [Q499S6_RAT]	0	608256					4.02144	4.98	2	2	462	51.7958	6.21436
B0BNA3	Arginyl-tRNA synthetase 2, mitochondrial OS=Rattus norvegicus GN=Rars2 PE=2 SV=1 - [B0BNA3_RAT]	0	82685.8					5.34156	1.9	1	2	578	65.2628	8.41162
Q3KRE2	Methyltransferase like 7A OS=Rattus norvegicus GN=Mettl7a PE=2 SV=1 - [Q3KRE2_RAT]	0	999529					16.9743	14.75	3	6	244	28.1234	8.45557
D3ZM21	Catechol-O-methyltransferase domain containing 1 (Predicted), isoform CRA_a OS=Rattus norvegicus GN=Comtd1 PE=4 SV=1 - [D3ZM21_RAT]	0	504695					4.42536	3.44	1	2	262	28.9686	8.76318
Q4QQS6	Asparagine-linked glycosylation 5 homolog (Yeast, dolichyl-phosphate beta-glucosyltransferase), isoform CRA_a OS=Rattus norvegicus GN=Alg5 PE=2 SV=1 - [Q4QQS6_RAT]	0	576557					4.18573	4.01	1	2	324	36.8333	8.646
G3V8M8	Poly (ADP-ribose) glycohydrolase, isoform CRA_b OS=Rattus norvegicus GN=Parg PE=4 SV=1 - [G3V8M8_RAT]	0	1.33261e+07					0	0.51	1	1	972	108.988	7.02002
D3ZMR7	Protein Tubgcp3 OS=Rattus norvegicus GN=Tubgcp3 PE=4 SV=1 - [D3ZMR7_RAT]	0	133006					2.18995	1.82	1	1	606	67.856	8.88037
Q6PCT7	RCG51933, isoform CRA_b OS=Rattus norvegicus GN=Tdrkh PE=2 SV=1 - [Q6PCT7_RAT]	0	605893					4.17705	7.09	2	2	296	32.3999	7.85498
D3ZX38	Prefoldin 1 (Predicted) OS=Rattus norvegicus GN=Pfdn1 PE=4 SV=1 - [D3ZX38_RAT]	0	1.31636e+06					2.34308	9.02	1	1	122	14.2465	6.81494
A8QIC3	DnaJ (Hsp40) homolog, subfamily C, member 9 (Predicted) OS=Rattus norvegicus GN=Dnajc9 PE=2 SV=1 - [A8QIC3_RAT]	0	721814					6.48012	8.11	2	3	259	29.9603	7.32764
D3ZCZ9	Protein LOC100912599 OS=Rattus norvegicus GN=LOC679739 PE=4 SV=1 - [D3ZCZ9_RAT]	0	907205					4.73938	23.28	2	4	116	13.0317	9.21729
D4A040	Protein Mrps11 OS=Rattus norvegicus GN=Mrps11 PE=3 SV=1 - [D4A040_RAT]	0	209525					2.37995	8.38	1	1	191	20.1556	10.7993
Q9R170	Branched-chain-amino-acid aminotransferase (Fragment) OS=Rattus norvegicus GN=Bcat1 PE=2 SV=1 - [Q9R170_RAT]	0	822839					3.46137	2.21	1	2	362	40.7959	7.41553
Q6P6G9	Hnrpa1 protein OS=Rattus norvegicus GN=Hnrnpa1 PE=2 SV=1 - [Q6P6G9_RAT]	0	1.69708e+06					7.87123	7.99	2	4	313	33.599	9.23193
Q5U2T0	Death associated protein 3 OS=Rattus norvegicus GN=Dap3 PE=2 SV=1 - [Q5U2T0_RAT]	0	631526					7.42363	11.51	4	4	391	44.466	8.92432
Q5BJU9	Acin1 protein (Fragment) OS=Rattus norvegicus GN=Acin1 PE=2 SV=1 - [Q5BJU9_RAT]	0	4.34213e+06					0	3.11	2	4	515	59.8059	9.51025
O88341	Integrin alpha E2 (Fragment) OS=Rattus norvegicus GN=Itgae PE=2 SV=1 - [O88341_RAT]	0	0					0	1.29	1	1	1167	128.513	6.26514
Q9QZI3	Robo2 (Fragment) OS=Rattus norvegicus GN=Robo2 PE=2 SV=1 - [Q9QZI3_RAT]	0	2.38768e+06					1.89093	0.94	1	1	1060	116.719	8.38232
O89045	DNA primase (Fragment) OS=Rattus norvegicus GN=Prim1 PE=2 SV=1 - [O89045_RAT]	0	783513					2.2321	2.17	1	1	415	49.109	8.49951
Q1JU69	ZH11 protein OS=Rattus norvegicus GN=Cops7a PE=2 SV=1 - [Q1JU69_RAT]	0	1.40416e+06					7.76892	10.04	2	3	229	25.3044	8.23584
D4A7R0	Protein LOC100910272 OS=Rattus norvegicus GN=LOC100910272 PE=2 SV=2 - [D4A7R0_RAT]	0	192767					1.80407	1.64	1	1	670	74.6058	9.17334
D3ZHG0	Protein Ptplb OS=Rattus norvegicus GN=Ptplb PE=4 SV=2 - [D3ZHG0_RAT]	0	1.36261e+06					1.84602	4.72	1	1	254	28.3481	9.5542
D3ZH36	Protein LOC100910536 OS=Rattus norvegicus GN=Elfn2-ps1 PE=4 SV=2 - [D3ZH36_RAT]	0	0					0	1.22	1	1	820	89.9002	7.32764
D3ZW33	Protein Bach2 OS=Rattus norvegicus GN=Bach2 PE=4 SV=1 - [D3ZW33_RAT]	0	4.82011e+07					0	1.43	1	1	839	91.8853	5.10986
D4A9B0	Protein Srbd1 OS=Rattus norvegicus GN=Srbd1 PE=4 SV=2 - [D4A9B0_RAT]	0	0					0	0.82	1	1	980	110.074	8.82178
D4A3M6	Protein LOC690035 OS=Rattus norvegicus GN=LOC690035 PE=2 SV=2 - [D4A3M6_RAT]	0	0					0	1.31	1	1	1373	151.039	6.7124
D3ZJU9	Protein Lgr6 OS=Rattus norvegicus GN=Lgr6 PE=4 SV=1 - [D3ZJU9_RAT]	0	6.13041e+06					0	1.55	1	1	965	104.47	5.75732
D3ZFN9	Protein Kif16b OS=Rattus norvegicus GN=Kif16b PE=2 SV=1 - [D3ZFN9_RAT]	0	297659					1.67162	0.61	1	2	1311	149.953	6.48096
D3ZD71	Protein Efhc1 OS=Rattus norvegicus GN=Efhc1 PE=4 SV=1 - [D3ZD71_RAT]	0	1.40996e+06					0	1.54	1	1	648	74.853	6.13818
D4A0Y6	Uncharacterized protein OS=Rattus norvegicus GN=Mki67 PE=4 SV=1 - [D4A0Y6_RAT]	0	846922					1.67049	0.35	1	1	3164	348.243	9.74463
D4A5H2	Protein RGD1306583 OS=Rattus norvegicus GN=Trappc13 PE=2 SV=2 - [D4A5H2_RAT]	0	605910					4.58872	1.91	1	2	418	46.4846	5.73193
D3ZYX5	Protein Myo6 OS=Rattus norvegicus GN=Myo6 PE=2 SV=2 - [D3ZYX5_RAT]	0	124104					3.1794	1.19	1	1	1258	145.666	8.93896
D4A5Q2	Structural maintenance of chromosomes protein OS=Rattus norvegicus GN=Smc2 PE=2 SV=1 - [D4A5Q2_RAT]	0	1.03213e+06					3.21275	0.84	1	2	1191	134.197	8.52881
D3ZQH6	Protein Pla2g4d OS=Rattus norvegicus GN=Pla2g4d PE=4 SV=1 - [D3ZQH6_RAT]	0	0					2.3894	1.82	1	1	825	92.8647	5.2749
D3ZET0	Uncharacterized protein OS=Rattus norvegicus PE=4 SV=2 - [D3ZET0_RAT]	0	504591					0	1.93	1	1	935	105.457	6.45557
E9PSZ5	Uncharacterized protein OS=Rattus norvegicus PE=2 SV=2 - [E9PSZ5_RAT]	0	170206					2.14854	1.09	1	1	914	100.782	5.80811
F1M5T1	Protein LOC100359668 OS=Rattus norvegicus GN=LOC100359668 PE=4 SV=2 - [F1M5T1_RAT]	0	1.58826e+06					3.25798	15.85	2	2	183	20.7057	6.65381
F1LRB7	Tumor susceptibility gene 101 protein OS=Rattus norvegicus GN=Tsg101 PE=2 SV=2 - [F1LRB7_RAT]	0	421898					2.07909	2.72	1	1	368	41.7706	7.04932
F1LX22	Uncharacterized protein OS=Rattus norvegicus PE=2 SV=2 - [F1LX22_RAT]	0	1.01138e+06					2.4812	9.18	3	5	403	45.7131	6.87354
F1LYL8	Ribosomal protein S6 kinase OS=Rattus norvegicus GN=Rps6ka6 PE=2 SV=2 - [F1LYL8_RAT]	0	596301					1.98712	1.74	2	2	860	97.3144	7.23975
F1LVM4	Protein Ap3s2 (Fragment) OS=Rattus norvegicus GN=Ap3s2 PE=4 SV=2 - [F1LVM4_RAT]	0	487047					2.17948	6.47	1	1	170	19.1748	4.729
F1LQ96	Gamma-synuclein OS=Rattus norvegicus GN=Sncg PE=2 SV=1 - [F1LQ96_RAT]	0	72688.3					0	13.11	1	1	122	12.9115	4.79248
M0R4W7	Uncharacterized protein (Fragment) OS=Rattus norvegicus PE=4 SV=1 - [M0R4W7_RAT]	0	1.56426e+06					1.67517	1.23	1	1	489	56.5375	8.14795
G3V9X8	Magnesium transporter protein 1 OS=Rattus norvegicus GN=Magt1 PE=4 SV=2 - [G3V9X8_RAT]	0	922884					1.62363	2.39	1	1	335	37.9154	9.70068
M0RCX0	Protein Pcbd2 (Fragment) OS=Rattus norvegicus GN=Pcbd2 PE=4 SV=1 - [M0RCX0_RAT]	0	1.36047e+06					1.69967	5.51	1	1	127	14.1241	9.20264
D3ZHI8	Protein Trappc11 OS=Rattus norvegicus GN=Trappc11 PE=4 SV=1 - [D3ZHI8_RAT]	0	0					0	1.41	1	1	1133	128.294	7.7085
D3ZW38	Protein Exosc6 OS=Rattus norvegicus GN=Exosc6 PE=4 SV=1 - [D3ZW38_RAT]	0	1.03461e+06					2.34086	8.82	2	4	272	28.3816	5.78271
M0RC20	Protein RGD1564039 (Fragment) OS=Rattus norvegicus GN=RGD1564039 PE=4 SV=1 - [M0RC20_RAT]	0	0					2.18134	6.25	1	1	176	21.0426	8.98291
E9PTQ3	Protein Adam28 OS=Rattus norvegicus GN=Adam28 PE=4 SV=1 - [E9PTQ3_RAT]	0	8.6208e+06					1.61963	0.84	1	2	718	80.7212	6.59521
F1LSV4	Protein Sptlc2 OS=Rattus norvegicus GN=Sptlc2 PE=2 SV=2 - [F1LSV4_RAT]	0	421743					6.73276	4.11	2	4	560	62.9409	8.17725
F1LXE2	Protein LOC100912684 OS=Rattus norvegicus GN=Olr67 PE=3 SV=2 - [F1LXE2_RAT]	0	731069					1.60589	2.24	1	1	312	35.2569	8.95361
F1LZF4	Uncharacterized protein OS=Rattus norvegicus PE=2 SV=2 - [F1LZF4_RAT]	0	0					2.21025	0.54	1	1	2616	287.251	6.46826
D3ZQE8	Protein Xpo5 OS=Rattus norvegicus GN=Xpo5 PE=2 SV=1 - [D3ZQE8_RAT]	0	441210					2.0671	0.83	1	1	1204	136.789	5.80811
D4A786	Protein LOC100360002 OS=Rattus norvegicus GN=LOC100362685 PE=4 SV=1 - [D4A786_RAT]	0	3.81743e+06					2.83806	17.24	1	1	58	6.37736	9.83252
F1LS29	Calpain-1 catalytic subunit OS=Rattus norvegicus GN=Capn1 PE=2 SV=1 - [F1LS29_RAT]	0	440115					4.95854	1.54	1	2	713	82.0482	5.64307
B2RYV1	Stim1 protein (Fragment) OS=Rattus norvegicus GN=Stim1 PE=2 SV=1 - [B2RYV1_RAT]	0	218557					5.63063	6.14	2	3	391	45.7284	6.78564
M0R3Q2	Uncharacterized protein (Fragment) OS=Rattus norvegicus PE=4 SV=1 - [M0R3Q2_RAT]	0	1.30786e+06					5.24219	3.54	1	3	198	21.4535	7.76709
D3ZZZ0	Protein Ahctf1 OS=Rattus norvegicus GN=Ahctf1 PE=4 SV=1 - [D3ZZZ0_RAT]	0	8.70167e+06					0	0.31	1	1	2240	247.729	6.58057
F1LY19	Protein LOC684558 OS=Rattus norvegicus GN=LOC684558 PE=4 SV=2 - [F1LY19_RAT]	0	469037					1.94416	0.89	1	1	1124	123.875	6.60986
D3ZID4	Protein Nipbl (Fragment) OS=Rattus norvegicus GN=Nipbl PE=2 SV=2 - [D3ZID4_RAT]	0	0					2.81953	0.71	1	1	2681	302.324	8.14795
B3SVE6	Neuroprotective protein 9 (Fragment) OS=Rattus norvegicus GN=Commd9 PE=2 SV=1 - [B3SVE6_RAT]	0	852725					10.3518	6.06	1	4	198	22.0115	6.27783
M0RB00	Uncharacterized protein OS=Rattus norvegicus PE=4 SV=1 - [M0RB00_RAT]	0	342873					0	1.15	1	1	1740	191.956	8.26514
A0JPJ3	Arsb protein (Fragment) OS=Rattus norvegicus GN=Arsb PE=2 SV=1 - [A0JPJ3_RAT]	0	1.75097e+06					4.22231	2.1	1	2	523	57.749	8.57275
B5DFI1	Cog1 protein (Fragment) OS=Rattus norvegicus GN=Cog1 PE=2 SV=1 - [B5DFI1_RAT]	0	546512					7.98475	2.04	2	3	979	108.502	7.29834
D3ZI76	Protein Gpat2 OS=Rattus norvegicus GN=Gpat2 PE=4 SV=1 - [D3ZI76_RAT]	0	0					0	0.75	1	1	801	88.9122	7.1958
D3ZL50	Protein Ttc37 OS=Rattus norvegicus GN=Ttc37 PE=4 SV=2 - [D3ZL50_RAT]	0	305921					4.99317	0.78	1	2	1403	156.06	6.65381
D3ZPH3	Uncharacterized protein (Fragment) OS=Rattus norvegicus PE=2 SV=2 - [D3ZPH3_RAT]	0	50457.4					0	1.56	1	1	577	64.5908	8.77783
B4F7A2	Armc8 protein (Fragment) OS=Rattus norvegicus GN=Armc8 PE=2 SV=1 - [B4F7A2_RAT]	0	631207					5.59411	2.83	2	3	672	75.2531	6.72705
B5DF03	Peptidyl-prolyl cis-trans isomerase (Fragment) OS=Rattus norvegicus GN=Fkbp3 PE=2 SV=1 - [B5DF03_RAT]	0	1.26919e+06					6.07732	5	1	2	220	24.8191	9.27588
A1L1K9	Ring finger and SPRY domain containing 1 OS=Rattus norvegicus GN=Rspry1 PE=2 SV=1 - [A1L1K9_RAT]	0	1.34329e+07					2.38361	3.3	1	1	576	64.334	5.50342
D4A308	Uncharacterized protein OS=Rattus norvegicus PE=4 SV=2 - [D4A308_RAT]	0	960883					0	1.31	1	1	764	86.0973	6.96143
Q6P6R6	Transglutaminase 2, C polypeptide OS=Rattus norvegicus GN=Tgm2 PE=2 SV=1 - [Q6P6R6_RAT]	0	3.67309e+06					1.83418	1.46	1	1	686	76.8871	5.07178
D3ZGG8	Protein Hps3 OS=Rattus norvegicus GN=Hps3 PE=4 SV=2 - [D3ZGG8_RAT]	0	477835					0	1.74	1	1	861	97.4056	5.98584
F1M1U0	Protein Mxra7 OS=Rattus norvegicus GN=Mxra7 PE=4 SV=2 - [F1M1U0_RAT]	0	407630					2.88594	9.59	1	1	146	15.8837	4.1958
F1LUI7	Protein Ankar OS=Rattus norvegicus GN=Ankar PE=4 SV=2 - [F1LUI7_RAT]	0	0					0	1.4	1	1	1427	161.215	8.1626
G3V9U2	3-ketoacyl-CoA thiolase, mitochondrial OS=Rattus norvegicus GN=Acaa2 PE=4 SV=2 - [G3V9U2_RAT]	0	327706					0	2.02	1	2	396	41.7575	8.14795
F1LWZ2	Uncharacterized protein (Fragment) OS=Rattus norvegicus PE=4 SV=2 - [F1LWZ2_RAT]	0	6.67662e+06					0	1.54	1	1	778	88.2221	9.02686
F1LSG3	Protein Fbf1 (Fragment) OS=Rattus norvegicus GN=Fbf1 PE=2 SV=2 - [F1LSG3_RAT]	0	0					1.79655	0.79	1	1	1146	127.363	6.17627
M0RCS9	Uncharacterized protein (Fragment) OS=Rattus norvegicus PE=4 SV=1 - [M0RCS9_RAT]	0	1.92316e+06					5.17149	10.42	1	2	144	16.6121	11.1362
M0R8G9	Protein LOC100910599 OS=Rattus norvegicus GN=LOC100910599 PE=4 SV=1 - [M0R8G9_RAT]	0	1.28896e+06					0	2.23	1	1	314	35.1111	8.04541
B1H263	RGD1307041 protein (Fragment) OS=Rattus norvegicus GN=RGD1307041 PE=2 SV=1 - [B1H263_RAT]	0	676887					5.82544	3.02	1	2	398	45.9448	8.52881
F2YRM8	EAAT5 variant OS=Rattus norvegicus PE=2 SV=1 - [F2YRM8_RAT]	0	0					1.85826	2.25	1	1	400	43.241	9.01221
D3ZWA8	Protein Appl1 (Fragment) OS=Rattus norvegicus GN=Appl1 PE=4 SV=2 - [D3ZWA8_RAT]	0	522984					1.89025	1.45	1	1	690	77.4495	5.5542
E9PSV5	Protein Psat1 OS=Rattus norvegicus GN=Psat1 PE=2 SV=2 - [E9PSV5_RAT]	0	747496					6.85411	3.78	1	2	370	40.4649	7.97217
F1LNV4	ATP-binding cassette sub-family B member 7, mitochondrial OS=Rattus norvegicus GN=Abcb7 PE=2 SV=2 - [F1LNV4_RAT]	0	562659					0	0.8	1	1	752	82.703	9.29053
F1M7H7	Membrane-associated guanylate kinase, WW and PDZ domain-containing protein 1 (Fragment) OS=Rattus norvegicus GN=Magi1 PE=4 SV=2 - [F1M7H7_RAT]	0	0					2.00429	1.87	1	1	1015	110.351	5.60498
Q5XI09	Gnl1 protein (Fragment) OS=Rattus norvegicus GN=Gnl1 PE=2 SV=1 - [Q5XI09_RAT]	0	1.36915e+06					1.64029	1.88	1	1	480	53.7377	5.05908
C8YL70	DNA-directed polymerase delta interacting protein 2 OS=Rattus norvegicus GN=Poldip2 PE=2 SV=1 - [C8YL70_RAT]	0	342929					5.12765	9.24	3	3	368	41.7711	8.63135
D3ZJD3	Protein RGD1565183 OS=Rattus norvegicus GN=LOC100362069 PE=4 SV=1 - [D3ZJD3_RAT]	0	1.30385e+06					2.15969	8.03	1	1	137	15.5555	11.9272
M0R6T4	Protein Mms19l OS=Rattus norvegicus GN=Mms19l PE=4 SV=1 - [M0R6T4_RAT]	0	326781					2.1783	1.07	1	1	1031	112.86	6.23975
D3ZZR5	Protein Snrpa1 OS=Rattus norvegicus GN=Snrpa1 PE=2 SV=1 - [D3ZZR5_RAT]	0	678131					12.3537	16.86	4	5	255	28.3001	8.83643
D4A6W6	Protein RGD1561333 OS=Rattus norvegicus GN=RGD1561333 PE=3 SV=1 - [D4A6W6_RAT]	0	1.73409e+06					2.76381	4.28	1	1	257	28.1393	10.7847
D3ZPD0	Protein Ckap2 OS=Rattus norvegicus GN=RGD1564477 PE=4 SV=1 - [D3ZPD0_RAT]	0	704009					0	2.07	1	1	676	75.3841	9.12939
Q562C3	Glycine C-acetyltransferase (2-amino-3-ketobutyrate-coenzyme A ligase) OS=Rattus norvegicus GN=Gcat PE=2 SV=1 - [Q562C3_RAT]	0	1.17193e+06					8.9515	8.17	3	4	416	45.1942	7.6499
M0R9S6	Uncharacterized protein OS=Rattus norvegicus PE=4 SV=1 - [M0R9S6_RAT]	0	0					2.00033	9.04	1	2	177	19.6606	8.36768
D3ZSE0	40S ribosomal protein S21 OS=Rattus norvegicus GN=LOC100363012 PE=3 SV=1 - [D3ZSE0_RAT]	0	1.04724e+06					9.03144	12.05	1	4	83	9.09351	8.51416
F1LYJ8	Protein Gramd4 (Fragment) OS=Rattus norvegicus GN=Gramd4 PE=4 SV=1 - [F1LYJ8_RAT]	0	87532.1					2.0513	2.17	1	1	599	68.6504	9.0708
D3Z8X6	Protein Dtx3l OS=Rattus norvegicus GN=Dtx3l PE=4 SV=1 - [D3Z8X6_RAT]	0	398151					0	1.07	1	1	750	83.0507	8.03076
F1LW16	Protein Btaf1 OS=Rattus norvegicus GN=Btaf1 PE=4 SV=2 - [F1LW16_RAT]	0	213149					1.80995	0.43	1	1	1855	207.589	6.41748
D4A7V1	Uncharacterized protein OS=Rattus norvegicus PE=4 SV=2 - [D4A7V1_RAT]	0	335889					3.14103	5.2	2	2	404	44.7769	5.68115
F1LVB0	Uncharacterized protein (Fragment) OS=Rattus norvegicus PE=3 SV=1 - [F1LVB0_RAT]	0	888074					1.99454	3.7	1	1	432	49.5134	6.62451
B0BNN0	Tsta3 protein OS=Rattus norvegicus GN=Tsta3 PE=2 SV=1 - [B0BNN0_RAT]	0	429709					1.64635	4.32	1	1	278	30.9145	6.60986
D4A3A9	Protein Galntl2 OS=Rattus norvegicus GN=Galnt15 PE=2 SV=2 - [D4A3A9_RAT]	0	0					2.07746	2.19	1	1	593	67.0501	6.21436
F1M4I4	Protein Vps51 OS=Rattus norvegicus GN=Vps51 PE=2 SV=2 - [F1M4I4_RAT]	0	294633					7.22704	4.48	3	4	781	85.9882	6.23975
F1LYC7	Protein Bcorl1 OS=Rattus norvegicus GN=Bcorl1 PE=2 SV=2 - [F1LYC7_RAT]	0	1.29382e+06					0	0.45	1	1	1788	191.061	7.73779
F1LNC3	PH domain leucine-rich repeat protein phosphatase 1 OS=Rattus norvegicus GN=Phlpp1 PE=2 SV=2 - [F1LNC3_RAT]	0	1.33282e+06					1.80066	0.47	1	1	1696	183.411	6.34131
D3ZET5	Uncharacterized protein OS=Rattus norvegicus PE=4 SV=2 - [D3ZET5_RAT]	0	339062					4.4381	5.36	1	2	261	30.3707	9.81787
D4AA13	Protein Dmxl1 OS=Rattus norvegicus GN=Dmxl1 PE=2 SV=1 - [D4AA13_RAT]	0	409836					0	0.2	1	1	3017	336.76	6.44287
F1M6U0	Protein Wwc1 OS=Rattus norvegicus GN=Wwc1 PE=4 SV=2 - [F1M6U0_RAT]	0	1.87504e+06					1.89313	1.09	1	1	1104	123.898	5.8335
F1M7T6	Uncharacterized protein OS=Rattus norvegicus GN=Ssr3 PE=2 SV=2 - [F1M7T6_RAT]	0	927205					10.8828	7.65	1	3	183	20.4387	9.26123
D4AB03	Protein Fam120a OS=Rattus norvegicus GN=Fam120a PE=4 SV=2 - [D4AB03_RAT]	0	220308					2.6303	1.26	1	1	1115	122.064	8.83643
F1LQQ1	Malic enzyme (Fragment) OS=Rattus norvegicus GN=Me1 PE=2 SV=2 - [F1LQQ1_RAT]	0	0					1.71461	1.64	1	2	549	61.0735	5.92236
F1LSH1	Protein Ell2 OS=Rattus norvegicus GN=Ell2 PE=2 SV=1 - [F1LSH1_RAT]	0	0					1.66635	1.09	1	1	640	72.2276	8.79248
D3ZIZ7	Uncharacterized protein (Fragment) OS=Rattus norvegicus PE=2 SV=2 - [D3ZIZ7_RAT]	0	403732					2.14786	15.12	1	1	86	9.70009	5.41455
F1M980	Glutaminase kidney isoform, mitochondrial OS=Rattus norvegicus GN=Gls PE=2 SV=1 - [F1M980_RAT]	0	513992					2.14075	3.15	1	1	476	52.9464	6.91748
M0R8M3	Uncharacterized protein OS=Rattus norvegicus PE=4 SV=1 - [M0R8M3_RAT]	0	1.55818e+06					2.07028	7.14	1	1	126	13.6082	10.0083
Q5K547	B cell lymphoma like X (Fragment) OS=Rattus norvegicus GN=Bcl2l1 PE=2 SV=1 - [Q5K547_RAT]	0	158391					1.71758	14.49	1	1	69	7.7116	4.42432
M0R6F2	Protein Acad10 OS=Rattus norvegicus GN=Acad10 PE=4 SV=1 - [M0R6F2_RAT]	0	3.02438e+06					1.62629	1.32	1	1	684	76.4387	8.5874
D4A2D3	Protein Mycbp2 (Fragment) OS=Rattus norvegicus GN=Mycbp2 PE=2 SV=2 - [D4A2D3_RAT]	0	101261					2.62358	0.37	1	1	3278	357.773	7.26904
Q6RKB2	Fasciclin II GPI-linked protein isoform OS=Rattus norvegicus GN=Ncam2 PE=2 SV=1 - [Q6RKB2_RAT]	0	0					0	1.51	1	1	727	81.135	6.30322
D3Z8J0	Protein RGD1564425 OS=Rattus norvegicus GN=RGD1564425 PE=4 SV=1 - [D3Z8J0_RAT]	0	585140					5.85592	7.8	1	2	205	23.0305	6.18896
M0RBX8	Uncharacterized protein (Fragment) OS=Rattus norvegicus PE=4 SV=1 - [M0RBX8_RAT]	0	715794					9.46976	14.63	1	3	82	9.3709	8.20654
F1LR22	Uncharacterized protein (Fragment) OS=Rattus norvegicus PE=4 SV=2 - [F1LR22_RAT]	0	1.85504e+06					2.2539	3.12	1	1	353	40.8897	7.26904
D3ZJH9	Malic enzyme OS=Rattus norvegicus GN=Me2 PE=3 SV=1 - [D3ZJH9_RAT]	0	706925					7.37983	7.36	4	4	584	65.3097	7.75244
F1LPG2	Protein Dock8 OS=Rattus norvegicus GN=Dock8 PE=2 SV=2 - [F1LPG2_RAT]	0	0					0	0.24	1	1	2099	238.792	7.03467
F1M466	Protein Zcchc11 (Fragment) OS=Rattus norvegicus GN=Zcchc11 PE=4 SV=2 - [F1M466_RAT]	0	0					0	1.77	1	1	1073	120.573	7.82568
F7EPH4	Protein Ppa1 OS=Rattus norvegicus GN=Ppa1 PE=4 SV=1 - [F7EPH4_RAT]	0	2.36263e+06					3.68788	3.11	1	2	289	32.7501	5.46533
M0RDU8	Protein LOC100912469 OS=Rattus norvegicus GN=LOC100912469 PE=4 SV=1 - [M0RDU8_RAT]	0	0					3.0285	4.75	1	1	358	40.9817	8.80713
F8WFH8	Tryptophan--tRNA ligase, cytoplasmic OS=Rattus norvegicus GN=Wars PE=3 SV=1 - [F8WFH8_RAT]	0	624484					2.45442	6.95	3	3	475	53.3927	6.60986
M0RBB1	Uncharacterized protein (Fragment) OS=Rattus norvegicus PE=4 SV=1 - [M0RBB1_RAT]	0	513521					0	10.1	1	1	99	10.5334	11.4878
Q5RJL1	Cbx3 protein OS=Rattus norvegicus GN=Cbx3 PE=4 SV=1 - [Q5RJL1_RAT]	0	535573					2.87425	18.31	1	1	71	7.92221	9.30518
Q6LDS4	Superoxide dismutase [Cu-Zn] OS=Rattus norvegicus GN=Sod1 PE=2 SV=1 - [Q6LDS4_RAT]	0	3.57594e+06					3.39082	7.24	1	1	152	15.6997	6.354
D3ZSP1	Protein LOC100361838 OS=Rattus norvegicus GN=Snrpe PE=4 SV=1 - [D3ZSP1_RAT]	0	705043					2.38319	11.96	1	1	92	10.7536	9.15869
D3ZXX3	Protein LOC689991 (Fragment) OS=Rattus norvegicus GN=LOC689991 PE=2 SV=2 - [D3ZXX3_RAT]	0	5.00685e+06					0	0.46	1	1	1731	193.815	6.21436
D4A626	Protein Clmn OS=Rattus norvegicus GN=Clmn PE=2 SV=1 - [D4A626_RAT]	0	617945					2.24069	0.78	1	1	1021	113.791	4.94482
D3ZHA0	Protein Flnc OS=Rattus norvegicus GN=Flnc PE=2 SV=1 - [D3ZHA0_RAT]	0	784482					3.12174	0.95	3	3	2726	290.804	5.89697
F1LP57	Protein Map2k4 (Fragment) OS=Rattus norvegicus GN=Map2k4 PE=4 SV=2 - [F1LP57_RAT]	0	0					2.04447	3.32	1	1	361	41.075	8.06006
Q5EB72	Histidyl-tRNA synthetase 2-like OS=Rattus norvegicus GN=Hars2 PE=2 SV=1 - [Q5EB72_RAT]	0	0					4.59599	4.96	1	2	262	29.2554	5.41455
Q99PF3	APEX (Fragment) OS=Rattus norvegicus GN=Apex1 PE=2 SV=1 - [Q99PF3_RAT]	0	652820					1.89259	6.92	2	3	289	32.3325	8.57275
D3ZFR9	Protein Rdh13 OS=Rattus norvegicus GN=Rdh13 PE=3 SV=1 - [D3ZFR9_RAT]	0	1.52991e+06					2.37563	6.29	2	2	334	36.385	8.86572
F1M9C1	Prolyl 3-hydroxylase 2 (Fragment) OS=Rattus norvegicus GN=Leprel1 PE=2 SV=2 - [F1M9C1_RAT]	0	1.62979e+06					1.693	1.28	1	1	547	62.2983	5.13525
G9BD46	Elongation of long chain fatty acids family member 5 OS=Rattus norvegicus GN=Elovl5 PE=2 SV=1 - [G9BD46_RAT]	0	1.40305e+06					5.41626	3.01	1	3	299	35.0337	9.5542
Q6TPJ7	S15 ribosomal protein (Fragment) OS=Rattus norvegicus GN=Rps15 PE=2 SV=1 - [Q6TPJ7_RAT]	0	3.12613e+06					2.30367	10.53	1	1	114	13.3511	10.1987
O88292	Protein C inhibitor OS=Rattus norvegicus GN=Serpina5 PE=2 SV=1 - [O88292_RAT]	0	1.95795e+06					0	1.48	1	1	406	45.5626	9.39307
F1M7J7	Protein Cep250 (Fragment) OS=Rattus norvegicus GN=Cep250 PE=2 SV=2 - [F1M7J7_RAT]	0	1.58238e+06					0	0.34	1	1	2354	269.936	5.04639
D3ZF12	Signal peptidase complex subunit 3 OS=Rattus norvegicus GN=Spcs3 PE=4 SV=1 - [D3ZF12_RAT]	0	729344					6.04819	12.78	2	3	180	20.3146	8.6167
F1LWX1	Protein LOC100910714 (Fragment) OS=Rattus norvegicus GN=LOC100910714 PE=3 SV=1 - [F1LWX1_RAT]	0	836069					2.14875	8.49	1	1	106	12.4087	10.3892
D3ZTC4	Protein Ccdc88b OS=Rattus norvegicus GN=Ccdc88b PE=4 SV=2 - [D3ZTC4_RAT]	0	2.58959e+06					0	0.41	1	1	1476	165.847	5.19873
Q4FZS3	Prpf8 protein (Fragment) OS=Rattus norvegicus GN=Prpf8 PE=2 SV=1 - [Q4FZS3_RAT]	0	91673.4					4.63723	2.68	1	2	410	46.9607	6.84424
D4A1J6	Protein Ankfy1 (Fragment) OS=Rattus norvegicus GN=Ankfy1 PE=4 SV=2 - [D4A1J6_RAT]	0	294525					1.63413	1.54	2	2	1169	128.581	5.97314
F1LZ53	Protein Exoc6b OS=Rattus norvegicus GN=Exoc6b PE=4 SV=2 - [F1LZ53_RAT]	0	258988					2.30586	2.47	1	2	809	94.1501	6.45557
F1LY67	Growth factor receptor-bound protein 14 OS=Rattus norvegicus GN=Grb14 PE=4 SV=2 - [F1LY67_RAT]	0	467307					0	2.23	1	1	538	60.559	8.54346
F1LSH0	Protein Sympk OS=Rattus norvegicus GN=Sympk PE=2 SV=2 - [F1LSH0_RAT]	0	0					2.21623	0.86	1	1	1280	142.039	6.04932
G3V9T2	Protein Tmf1 OS=Rattus norvegicus GN=Tmf1 PE=4 SV=2 - [G3V9T2_RAT]	0	0					0	0.82	1	1	1091	121.569	4.86865
M0R637	Protein LOC679091 (Fragment) OS=Rattus norvegicus GN=LOC679091 PE=4 SV=1 - [M0R637_RAT]	0	1.74466e+06					9.07244	8.21	2	4	268	30.6627	7.13721
Q19LA7	Vesicle-associated membrane protein 2 (Fragment) OS=Rattus norvegicus GN=Vamp2 PE=2 SV=1 - [Q19LA7_RAT]	0	1.40504e+06					4.01897	48.57	1	1	35	4.03711	9.31982
B0BNF4	Kctd6 protein (Fragment) OS=Rattus norvegicus GN=Kctd6 PE=2 SV=1 - [B0BNF4_RAT]	0	1.17875e+06					8.23736	11.54	3	5	234	27.2624	6.15088
D3ZPL8	Protein Armc3 OS=Rattus norvegicus GN=Armc3 PE=2 SV=1 - [D3ZPL8_RAT]	0	522600					0	1.9	1	1	684	74.6317	5.49072
E9PSL8	Protein Kif6 OS=Rattus norvegicus GN=Kif6 PE=3 SV=2 - [E9PSL8_RAT]	0	0					2.02649	1.63	1	1	798	90.0135	7.29834
D3ZSE6	Uncharacterized protein OS=Rattus norvegicus PE=4 SV=2 - [D3ZSE6_RAT]	0	0					12.973	5.97	1	6	352	39.7085	8.96826
F1MA88	Protein Dock5 OS=Rattus norvegicus GN=Dock5 PE=2 SV=2 - [F1MA88_RAT]	0	0					1.69437	1.49	1	1	671	76.2063	7.02002
F1LTW0	Uncharacterized protein (Fragment) OS=Rattus norvegicus PE=4 SV=1 - [F1LTW0_RAT]	0	793620					7.07132	7.03	1	3	185	21.38	7.43018
M0R6L7	Uncharacterized protein (Fragment) OS=Rattus norvegicus PE=4 SV=1 - [M0R6L7_RAT]	0	721407					3.50234	13.61	3	3	191	21.5898	8.11865
D3ZUZ9	Peptidyl-prolyl cis-trans isomerase OS=Rattus norvegicus GN=Ppih PE=2 SV=2 - [D3ZUZ9_RAT]	0	452448					0	5.29	1	2	170	18.5994	8.73389
F1M614	Protein Lama2 (Fragment) OS=Rattus norvegicus GN=Lama2 PE=2 SV=2 - [F1M614_RAT]	0	1.7752e+06					0	0.27	1	1	2546	280.438	5.92236
D3ZCD4	Phosphatidylinositol transfer protein beta isoform (Fragment) OS=Rattus norvegicus GN=Pitpnb PE=2 SV=2 - [D3ZCD4_RAT]	0	241188					2.2521	3.69	1	1	271	31.4148	6.25244
D3ZCI1	Protein Dtl OS=Rattus norvegicus GN=Dtl PE=2 SV=1 - [D3ZCI1_RAT]	0	0					0	1.11	1	1	719	77.5802	8.71924
F1M3H8	Protein Hnrnpa0 OS=Rattus norvegicus GN=Hnrnpa0 PE=4 SV=2 - [F1M3H8_RAT]	0	1.77918e+06					2.44194	7.26	2	3	303	30.2776	9.30518
F1M8K7	Protein Alg3 OS=Rattus norvegicus GN=Alg3 PE=4 SV=2 - [F1M8K7_RAT]	0	290555					2.38884	3.42	2	2	438	50.1476	9.45166
F1M1H0	Protein Dera (Fragment) OS=Rattus norvegicus GN=Dera PE=4 SV=2 - [F1M1H0_RAT]	0	1.10426e+06					2.66539	3.88	1	1	309	34.132	8.67529
M0R5N3	Uncharacterized protein (Fragment) OS=Rattus norvegicus PE=4 SV=1 - [M0R5N3_RAT]	0	2.26352e+06					1.83637	16.8	4	4	250	28.1163	7.89893
D3ZR66	Protein Ccdc158 OS=Rattus norvegicus GN=Ccdc158 PE=2 SV=1 - [D3ZR66_RAT]	0	3.39794e+07					0	1.98	1	1	354	40.8095	5.26221
D4ABY4	Uncharacterized protein OS=Rattus norvegicus GN=Ube2j1 PE=2 SV=2 - [D4ABY4_RAT]	0	147234					2.01316	5.2	1	1	250	27.9782	7.81104
D3ZIX4	Protein H1fx OS=Rattus norvegicus GN=H1fx PE=3 SV=1 - [D3ZIX4_RAT]	0	1.66469e+06					3.96726	5.21	1	2	192	20.4763	11.1362
F1LPB9	Rabphilin-3A OS=Rattus norvegicus GN=Rph3a PE=2 SV=1 - [F1LPB9_RAT]	0	181575					2.4244	2.19	1	1	684	75.7557	8.17725
D0UFD0	Prostate leucine zipper variant 2 OS=Rattus norvegicus GN=Tpd52 PE=2 SV=1 - [D0UFD0_RAT]	0	400429					2.61908	6.25	1	1	224	24.224	4.71631
D3ZSV8	Protein Unc79 OS=Rattus norvegicus GN=Unc79 PE=2 SV=2 - [D3ZSV8_RAT]	0	3.08078e+06					0	0.3	1	1	2649	296.702	6.41748
F1LQS9	Rho guanine nucleotide exchange factor 11 OS=Rattus norvegicus GN=Arhgef11 PE=2 SV=2 - [F1LQS9_RAT]	0	0					1.71379	0.79	1	1	1526	168.416	5.93506
Q6IN42	Grn protein OS=Rattus norvegicus GN=Grn PE=2 SV=1 - [Q6IN42_RAT]	0	975333					4.62022	6.65	3	3	511	54.9913	6.34131
Q2XTA4	Epidermal fatty acid binding protein 5 (Fragment) OS=Rattus norvegicus GN=Fabp5 PE=2 SV=1 - [Q2XTA4_RAT]	0	594494					7.04729	8.91	1	3	101	11.1625	7.02002
O70288	Glutaminyl cyclase (Fragment) OS=Rattus norvegicus GN=Qpct PE=2 SV=1 - [O70288_RAT]	0	1.00918e+06					1.64375	2.93	1	1	239	27.1729	6.96143
Q498D4	Tln1 protein OS=Rattus norvegicus GN=Tln1 PE=2 SV=1 - [Q498D4_RAT]	0	2.40449e+07					0	0.71	1	1	1552	161.877	6.23975
Q5I0K4	Mrps9 protein (Fragment) OS=Rattus norvegicus GN=Mrps9 PE=2 SV=1 - [Q5I0K4_RAT]	0	457968					5.35528	2.96	1	2	338	39.3671	8.646
Q5XFW3	Ugp2 protein (Fragment) OS=Rattus norvegicus GN=Ugp2 PE=2 SV=1 - [Q5XFW3_RAT]	0	902493					2.51671	6.48	2	2	293	32.475	6.31592
