# Supplementary material for: Mysterious inhibitory cell regulator investigated and found likely to be secretogranin II related
Source: PeerJ. 2017 Oct 13;5:e3833. doi: 10.7717/peerj.3833 (PMC5642266; doi:10.7717/peerj.3833)
Supplement: Supplemental Information 12 — Total control hits 1634. [file peerj-05-3833-s012.xlsx]

## Sheet: Sheet1
Accession	Description	Score	Coverage	# Proteins	# Unique Peptides	# Peptides	# PSMs	Area	# AAs	MW [kDa]	calc. pI
F1M779	Clathrin heavy chain 1 OS=Rattus norvegicus GN=Cltc PE=2 SV=1 - [F1M779_RAT]	717.396	33.31	2	51	51	281	4.93573e+07	1675	191.438	5.69385
P01946	Hemoglobin subunit alpha-1/2 OS=Rattus norvegicus GN=Hba1 PE=1 SV=3 - [HBA_RAT]	702.629	64.08	2	7	7	227	1.58726e+08	142	15.3188	7.97217
Q6P9V9	Tubulin alpha-1B chain OS=Rattus norvegicus GN=Tuba1b PE=1 SV=1 - [TBA1B_RAT]	591.873	42.57	2	0	18	256	2.59262e+08	451	50.1196	5.05908
P68370	Tubulin alpha-1A chain OS=Rattus norvegicus GN=Tuba1a PE=1 SV=1 - [TBA1A_RAT]	567.095	42.57	5	0	18	249	2.59262e+08	451	50.1036	5.05908
P85108	Tubulin beta-2A chain OS=Rattus norvegicus GN=Tubb2a PE=1 SV=1 - [TBB2A_RAT]	564.633	43.6	2	1	17	191	6.54388e+07	445	49.875	4.89404
Q3KRE8	Tubulin beta-2B chain OS=Rattus norvegicus GN=Tubb2b PE=1 SV=1 - [TBB2B_RAT]	555.23	43.6	2	1	17	188	5.60969e+07	445	49.9209	4.89404
Q6AYZ1	Tubulin alpha-1C chain OS=Rattus norvegicus GN=Tuba1c PE=1 SV=1 - [TBA1C_RAT]	544.988	42.76	3	1	18	243	1.9378e+08	449	49.9055	5.09717
Q5XIF6	Tubulin alpha-4A chain OS=Rattus norvegicus GN=Tuba4a PE=2 SV=1 - [TBA4A_RAT]	535.051	42.86	2	4	18	243	1.6744e+08	448	49.8924	5.05908
P01244	Somatotropin OS=Rattus norvegicus GN=Gh1 PE=1 SV=1 - [SOMA_RAT]	528.383	38.43	3	9	9	189	3.07007e+08	216	24.6404	5.96045
G3V7C6	RCG45400 OS=Rattus norvegicus GN=Tubb4b PE=3 SV=1 - [G3V7C6_RAT]	525.728	43.6	3	1	17	176	5.60969e+07	445	49.799	4.89404
Q4QRB4	Tubulin beta-3 chain OS=Rattus norvegicus GN=Tubb3 PE=1 SV=1 - [TBB3_RAT]	519.006	43.11	2	6	17	170	5.56729e+07	450	50.3862	4.93213
P02091	Hemoglobin subunit beta-1 OS=Rattus norvegicus GN=Hbb PE=1 SV=3 - [HBB1_RAT]	504.872	77.55	1	3	11	232	3.93654e+08	147	15.9692	8.07471
P00762	Anionic trypsin-1 OS=Rattus norvegicus GN=Prss1 PE=1 SV=1 - [TRY1_RAT]	503.373	8.13	1	1	1	110	2.5875e+07	246	25.9427	4.89404
P69897	Tubulin beta-5 chain OS=Rattus norvegicus GN=Tubb5 PE=1 SV=1 - [TBB5_RAT]	500.349	39.86	3	2	16	168	5.60969e+07	444	49.639	4.89404
P06687	Sodium/potassium-transporting ATPase subunit alpha-3 OS=Rattus norvegicus GN=Atp1a3 PE=1 SV=2 - [AT1A3_RAT]	495.574	40.47	12	21	38	183	1.07873e+08	1013	111.62	5.41455
B4F7C2	Protein Tubb4a OS=Rattus norvegicus GN=Tubb4 PE=2 SV=1 - [B4F7C2_RAT]	472.625	38.96	2	2	15	153	4.99408e+07	444	49.5539	4.88135
P11517	Hemoglobin subunit beta-2 OS=Rattus norvegicus PE=1 SV=2 - [HBB2_RAT]	471.785	76.19	1	3	11	220	2.98906e+08	147	15.9723	8.79248
P00507	Aspartate aminotransferase, mitochondrial OS=Rattus norvegicus GN=Got2 PE=1 SV=2 - [AATM_RAT]	453.666	43.72	3	21	21	175	1.45017e+08	430	47.2841	8.99756
P06686	Sodium/potassium-transporting ATPase subunit alpha-2 OS=Rattus norvegicus GN=Atp1a2 PE=1 SV=1 - [AT1A2_RAT]	434.62	42.55	13	24	42	181	1.07873e+08	1020	112.145	5.5542
G3V6D3	ATP synthase subunit beta OS=Rattus norvegicus GN=Atp5b PE=3 SV=1 - [G3V6D3_RAT]	423.709	46.31	3	20	20	155	1.23262e+08	529	56.3095	5.2749
P48500	Triosephosphate isomerase OS=Rattus norvegicus GN=Tpi1 PE=1 SV=2 - [TPIS_RAT]	400.829	69.48	4	14	14	150	2.48699e+08	249	26.8318	7.23975
P04797	Glyceraldehyde-3-phosphate dehydrogenase OS=Rattus norvegicus GN=Gapdh PE=1 SV=3 - [G3P_RAT]	377.157	38.44	50	11	11	143	2.7643e+08	333	35.8052	8.03076
P60711	Actin, cytoplasmic 1 OS=Rattus norvegicus GN=Actb PE=1 SV=1 - [ACTB_RAT]	358.609	41.6	10	7	17	149	3.87192e+08	375	41.7097	5.47803
P10860	Glutamate dehydrogenase 1, mitochondrial OS=Rattus norvegicus GN=Glud1 PE=1 SV=2 - [DHE3_RAT]	354.828	43.91	3	24	24	158	1.11459e+08	558	61.3773	8.00146
F1LP05	ATP synthase subunit alpha OS=Rattus norvegicus GN=Atp5a1 PE=2 SV=1 - [F1LP05_RAT]	349.374	37.79	3	21	21	146	1.68006e+08	553	59.7757	9.26123
P63018	Heat shock cognate 71 kDa protein OS=Rattus norvegicus GN=Hspa8 PE=1 SV=1 - [HSP7C_RAT]	338.582	39.94	13	24	26	133	6.53647e+07	646	70.8272	5.51611
G3V846	Excitatory amino acid transporter 1 OS=Rattus norvegicus GN=Slc1a3 PE=4 SV=1 - [G3V846_RAT]	332.404	20.44	7	10	10	104	1.89395e+07	543	59.6447	8.39697
M0R757	Protein LOC100360413 OS=Rattus norvegicus GN=LOC100360413 PE=4 SV=1 - [M0R757_RAT]	330.396	32.47	7	7	14	138	1.13112e+08	462	50.0761	9.01221
P06761	78 kDa glucose-regulated protein OS=Rattus norvegicus GN=Hspa5 PE=1 SV=1 - [GRP78_RAT]	326.618	47.71	1	28	30	122	5.21034e+07	654	72.3024	5.16064
P47942	Dihydropyrimidinase-related protein 2 OS=Rattus norvegicus GN=Dpysl2 PE=1 SV=1 - [DPYL2_RAT]	304.963	43.01	1	14	18	112	8.3172e+07	572	62.2386	6.37939
P06685	Sodium/potassium-transporting ATPase subunit alpha-1 OS=Rattus norvegicus GN=Atp1a1 PE=1 SV=1 - [AT1A1_RAT]	301.653	29.62	4	12	28	122	8.78616e+07	1023	112.982	5.45264
P62632	Elongation factor 1-alpha 2 OS=Rattus norvegicus GN=Eef1a2 PE=2 SV=1 - [EF1A2_RAT]	295.118	25.49	1	5	12	125	1.13112e+08	463	50.4223	9.02686
Q63011	Zero beta-globin (Fragment) OS=Rattus norvegicus GN=MGC72973 PE=2 SV=1 - [Q63011_RAT]	240.45	59.59	5	5	8	139	1.45722e+08	146	15.8962	7.29834
Q64428	Trifunctional enzyme subunit alpha, mitochondrial OS=Rattus norvegicus GN=Hadha PE=1 SV=2 - [ECHA_RAT]	217.999	29.36	2	21	21	81	3.11557e+07	763	82.6125	9.05615
G3V8C3	Vimentin OS=Rattus norvegicus GN=Vim PE=3 SV=1 - [G3V8C3_RAT]	214.859	44.21	22	18	21	80	2.69211e+07	466	53.6681	5.12256
P11980	Pyruvate kinase isozymes M1/M2 OS=Rattus norvegicus GN=Pkm PE=1 SV=3 - [KPYM_RAT]	207.535	44.44	10	16	22	92	6.24762e+07	531	57.7809	7.06396
P63269	Actin, gamma-enteric smooth muscle OS=Rattus norvegicus GN=Actg2 PE=2 SV=1 - [ACTH_RAT]	205.539	32.18	6	2	12	95	3.01302e+08	376	41.8498	5.47803
P04636	Malate dehydrogenase, mitochondrial OS=Rattus norvegicus GN=Mdh2 PE=1 SV=2 - [MDHM_RAT]	205.341	53.25	2	16	16	79	3.82431e+07	338	35.6608	8.67529
Q63081	Protein disulfide-isomerase A6 OS=Rattus norvegicus GN=Pdia6 PE=1 SV=2 - [PDIA6_RAT]	203.119	33.41	1	13	13	71	5.72111e+07	440	48.1433	5.13525
Q66HF1	NADH-ubiquinone oxidoreductase 75 kDa subunit, mitochondrial OS=Rattus norvegicus GN=Ndufs1 PE=1 SV=1 - [NDUS1_RAT]	184.168	35.63	1	21	21	71	2.32546e+07	727	79.3616	5.89697
P05065	Fructose-bisphosphate aldolase A OS=Rattus norvegicus GN=Aldoa PE=1 SV=2 - [ALDOA_RAT]	174.966	53.57	5	15	18	74	5.22943e+07	364	39.3273	8.08936
P07335	Creatine kinase B-type OS=Rattus norvegicus GN=Ckb PE=1 SV=2 - [KCRB_RAT]	167.632	39.9	1	13	13	85	6.26216e+07	381	42.6983	5.66846
P34058	Heat shock protein HSP 90-beta OS=Rattus norvegicus GN=Hsp90ab1 PE=1 SV=4 - [HS90B_RAT]	161.155	36.46	6	15	26	69	3.49947e+07	724	83.2291	5.03369
P09606	Glutamine synthetase OS=Rattus norvegicus GN=Glul PE=1 SV=3 - [GLNA_RAT]	158.825	31.64	3	12	12	57	4.05264e+07	373	42.2403	7.07861
F1MAB2	Uncharacterized protein OS=Rattus norvegicus PE=4 SV=2 - [F1MAB2_RAT]	147.649	23.09	2	21	21	67	1.81927e+07	1009	110.505	6.48096
Q6IRK8	Spna2 protein OS=Rattus norvegicus GN=Sptan1 PE=2 SV=1 - [Q6IRK8_RAT]	143.928	17.46	5	39	39	68	5.66207e+06	2452	282.206	5.31299
P47819-2	Isoform 2 of Glial fibrillary acidic protein OS=Rattus norvegicus GN=Gfap - [GFAP_RAT]	143.481	48.93	20	20	21	56	2.97976e+07	421	48.7522	5.96045
P32551	Cytochrome b-c1 complex subunit 2, mitochondrial OS=Rattus norvegicus GN=Uqcrc2 PE=1 SV=2 - [QCR2_RAT]	141.472	33.41	1	13	13	54	2.83335e+07	452	48.3662	9.14404
F1LU71	AU RNA binding protein/enoyl-coenzyme A hydratase (Predicted), isoform CRA_a OS=Rattus norvegicus GN=Auh PE=3 SV=2 - [F1LU71_RAT]	141.23	30.79	1	10	10	47	1.9862e+07	315	33.32	9.42236
P02688	Myelin basic protein S OS=Rattus norvegicus GN=Mbp PE=1 SV=3 - [MBP_RAT]	135.664	38.46	7	8	8	100	6.7761e+07	195	21.489	11.2388
Q6IMF3	Keratin, type II cytoskeletal 1 OS=Rattus norvegicus GN=Krt1 PE=2 SV=1 - [K2C1_RAT]	135.08	11.2	3	5	8	51	6.80788e+07	625	64.7911	7.86963
F1M953	Stress-70 protein, mitochondrial OS=Rattus norvegicus GN=Hspa9 PE=2 SV=1 - [F1M953_RAT]	128.368	31.66	3	18	18	44	9.07923e+06	679	73.6988	6.16357
P09117	Fructose-bisphosphate aldolase C OS=Rattus norvegicus GN=Aldoc PE=1 SV=3 - [ALDOC_RAT]	127.879	58.4	4	14	17	49	2.32764e+07	363	39.2592	7.12256
P04182	Ornithine aminotransferase, mitochondrial OS=Rattus norvegicus GN=Oat PE=1 SV=1 - [OAT_RAT]	124.03	25.97	2	7	12	49	3.83201e+07	439	48.302	6.99072
Q62950	Dihydropyrimidinase-related protein 1 OS=Rattus norvegicus GN=Crmp1 PE=1 SV=1 - [DPYL1_RAT]	123.36	31.29	1	11	16	46	4.45415e+07	572	62.1566	7.12256
D4ABT0	Guanine nucleotide-binding protein G(o) subunit alpha OS=Rattus norvegicus GN=Gnao1 PE=2 SV=2 - [D4ABT0_RAT]	122.75	34.75	8	8	11	47	3.37042e+07	354	39.995	6.01123
P62944	AP-2 complex subunit beta OS=Rattus norvegicus GN=Ap2b1 PE=1 SV=1 - [AP2B1_RAT]	122.446	23.69	2	10	22	60	1.66448e+07	937	104.486	5.37646
P82995	Heat shock protein HSP 90-alpha OS=Rattus norvegicus GN=Hsp90aa1 PE=1 SV=3 - [HS90A_RAT]	120.639	27.97	8	11	21	51	3.49947e+07	733	84.7618	5.0083
P11884	Aldehyde dehydrogenase, mitochondrial OS=Rattus norvegicus GN=Aldh2 PE=1 SV=1 - [ALDH2_RAT]	114.93	37.96	1	1	16	46	1.68217e+07	519	56.4527	7.04932
F1LN88	Aldehyde dehydrogenase, mitochondrial OS=Rattus norvegicus GN=Aldh2 PE=2 SV=2 - [F1LN88_RAT]	113.489	37.38	1	1	16	46	1.68217e+07	519	56.4807	7.32764
P35435	ATP synthase subunit gamma, mitochondrial OS=Rattus norvegicus GN=Atp5c1 PE=1 SV=2 - [ATPG_RAT]	111.621	32.23	4	9	9	62	1.77084e+07	273	30.1717	8.83643
Q5RK08	Glioblastoma amplified sequence OS=Rattus norvegicus GN=Gbas PE=2 SV=1 - [Q5RK08_RAT]	111.501	28.83	1	9	9	57	9.71486e+07	281	32.9209	9.36377
P14604	Enoyl-CoA hydratase, mitochondrial OS=Rattus norvegicus GN=Echs1 PE=1 SV=1 - [ECHM_RAT]	110.944	28.97	1	7	7	47	1.57337e+07	290	31.4962	8.1333
F1LQ81	Vesicle-fusing ATPase (Fragment) OS=Rattus norvegicus GN=Nsf PE=2 SV=2 - [F1LQ81_RAT]	110.591	28.53	4	20	20	47	1.46044e+07	743	82.5929	6.72705
M0R8B6	Protein LOC679312 OS=Rattus norvegicus GN=LOC679312 PE=4 SV=1 - [M0R8B6_RAT]	110.567	13.05	1	1	6	51	3.5112e+07	452	50.3836	5.10986
Q06647	ATP synthase subunit O, mitochondrial OS=Rattus norvegicus GN=Atp5o PE=1 SV=1 - [ATPO_RAT]	109.501	53.99	1	10	10	46	5.80121e+07	213	23.3828	10.0229
P63039	60 kDa heat shock protein, mitochondrial OS=Rattus norvegicus GN=Hspd1 PE=1 SV=1 - [CH60_RAT]	108.824	37.7	4	19	19	40	1.46452e+07	573	60.9174	6.17627
B2RYT1	Prl protein OS=Rattus norvegicus GN=Prl PE=2 SV=1 - [B2RYT1_RAT]	108.161	28.89	4	7	8	43	1.37248e+08	225	25.6651	5.60498
G3V836	Clusterin OS=Rattus norvegicus GN=Clu PE=3 SV=1 - [G3V836_RAT]	107.224	27.52	5	9	9	37	1.3562e+07	447	51.3873	5.80811
P31399	ATP synthase subunit d, mitochondrial OS=Rattus norvegicus GN=Atp5h PE=1 SV=3 - [ATP5H_RAT]	104.058	44.1	3	8	8	40	2.32624e+07	161	18.7516	6.59521
P63012	Ras-related protein Rab-3A OS=Rattus norvegicus GN=Rab3a PE=1 SV=1 - [RAB3A_RAT]	101.823	39.55	10	3	8	41	6.32872e+07	220	24.9541	5.03369
Q62952	Dihydropyrimidinase-related protein 3 OS=Rattus norvegicus GN=Dpysl3 PE=1 SV=2 - [DPYL3_RAT]	101.568	27.19	2	8	13	40	2.70327e+07	570	61.928	6.49365
P42123	L-lactate dehydrogenase B chain OS=Rattus norvegicus GN=Ldhb PE=1 SV=2 - [LDHB_RAT]	101.148	28.44	2	7	10	38	2.61588e+07	334	36.5891	6.04932
P62260	14-3-3 protein epsilon OS=Rattus norvegicus GN=Ywhae PE=1 SV=1 - [1433E_RAT]	101.079	34.9	1	7	9	43	2.91202e+07	255	29.1554	4.7417
Q64542-3	Isoform ZA of Plasma membrane calcium-transporting ATPase 4 OS=Rattus norvegicus GN=Atp2b4 - [AT2B4_RAT]	99.1822	19.62	7	11	20	41	7.04252e+06	1157	127.384	6.53662
Q9ER34	Aconitate hydratase, mitochondrial OS=Rattus norvegicus GN=Aco2 PE=1 SV=2 - [ACON_RAT]	98.2658	27.18	1	19	19	42	1.08545e+07	780	85.38	7.82568
Q05962	ADP/ATP translocase 1 OS=Rattus norvegicus GN=Slc25a4 PE=1 SV=3 - [ADT1_RAT]	98.2037	37.58	3	6	11	63	6.89224e+07	298	32.9682	9.78857
I1T7F1	GLT1a splice variant OS=Rattus norvegicus PE=2 SV=1 - [I1T7F1_RAT]	98.0036	16.6	9	8	8	37	1.52727e+07	500	54.4655	6.25244
M0R9Q9	Cytosol aminopeptidase (Fragment) OS=Rattus norvegicus GN=Lap3 PE=4 SV=1 - [M0R9Q9_RAT]	97.0411	37.17	3	14	14	37	1.31016e+07	487	52.5947	6.48096
P68255	14-3-3 protein theta OS=Rattus norvegicus GN=Ywhaq PE=1 SV=1 - [1433T_RAT]	95.4292	39.18	14	7	11	37	2.9672e+07	245	27.7608	4.77979
Q6NYB7	Ras-related protein Rab-1A OS=Rattus norvegicus GN=Rab1A PE=1 SV=3 - [RAB1A_RAT]	94.6278	51.22	12	5	11	41	6.7934e+07	205	22.6634	6.21436
B2RZ24	Sucla2 protein (Fragment) OS=Rattus norvegicus GN=Sucla2 PE=2 SV=1 - [B2RZ24_RAT]	93.9004	33.79	6	17	17	40	2.44386e+07	438	47.3576	6.45557
P61206	ADP-ribosylation factor 3 OS=Rattus norvegicus GN=Arf3 PE=1 SV=2 - [ARF3_RAT]	93.5554	42.54	7	4	8	44	5.04212e+07	181	20.5877	7.43018
P63102	14-3-3 protein zeta/delta OS=Rattus norvegicus GN=Ywhaz PE=1 SV=1 - [1433Z_RAT]	93.4812	30.2	1	5	7	32	2.95246e+07	245	27.7537	4.79248
P19804	Nucleoside diphosphate kinase B OS=Rattus norvegicus GN=Nme2 PE=1 SV=1 - [NDKB_RAT]	92.2186	46.05	4	1	6	46	1.14195e+07	152	17.2719	7.44482
P35213-2	Isoform Short of 14-3-3 protein beta/alpha OS=Rattus norvegicus GN=Ywhab - [1433B_RAT]	90.6894	28.69	5	3	6	32	2.93205e+07	244	27.8047	4.88135
D4A133	Protein Atp6v1a OS=Rattus norvegicus GN=Atp6v1a PE=3 SV=1 - [D4A133_RAT]	90.2501	27.07	2	14	14	35	8.08567e+06	617	68.2216	5.57959
P56574	Isocitrate dehydrogenase [NADP], mitochondrial OS=Rattus norvegicus GN=Idh2 PE=1 SV=2 - [IDHP_RAT]	89.2498	36.5	1	14	15	34	8.7951e+06	452	50.9349	8.68994
Q09073	ADP/ATP translocase 2 OS=Rattus norvegicus GN=Slc25a5 PE=1 SV=3 - [ADT2_RAT]	87.7384	36.91	5	7	12	55	5.05544e+07	298	32.8801	9.72998
G3V936	Citrate synthase OS=Rattus norvegicus GN=Cs PE=3 SV=1 - [G3V936_RAT]	87.2971	25.75	3	12	12	43	3.43508e+07	466	51.7975	8.41162
P13233	2',3'-cyclic-nucleotide 3'-phosphodiesterase OS=Rattus norvegicus GN=Cnp PE=1 SV=2 - [CN37_RAT]	86.8531	38.57	1	17	18	46	1.9397e+07	420	47.2386	8.89502
P49432	Pyruvate dehydrogenase E1 component subunit beta, mitochondrial OS=Rattus norvegicus GN=Pdhb PE=1 SV=2 - [ODPB_RAT]	84.9913	31.2	1	10	10	29	1.34046e+07	359	38.957	6.65381
Q5EBA4	Nipsnap1 protein (Fragment) OS=Rattus norvegicus GN=Nipsnap1 PE=2 SV=1 - [Q5EBA4_RAT]	84.7854	24.03	8	8	8	39	5.14178e+07	283	33.194	9.37842
F1LX07	Uncharacterized protein (Fragment) OS=Rattus norvegicus GN=LOC100360985 PE=3 SV=2 - [F1LX07_RAT]	84.4707	25.63	1	11	15	34	1.19365e+07	675	74.1807	8.74854
Q05982	Nucleoside diphosphate kinase A OS=Rattus norvegicus GN=Nme1 PE=1 SV=1 - [NDKA_RAT]	84.4599	52.63	4	2	7	41	1.20068e+07	152	17.1818	6.32861
P63245	Guanine nucleotide-binding protein subunit beta-2-like 1 OS=Rattus norvegicus GN=Gnb2l1 PE=1 SV=3 - [GBLP_RAT]	83.8809	54.57	1	16	16	34	1.63009e+07	317	35.0546	7.69385
P50137	Transketolase OS=Rattus norvegicus GN=Tkt PE=1 SV=1 - [TKT_RAT]	83.5561	21.19	3	11	11	35	9.19614e+06	623	67.6006	7.48877
P47860	6-phosphofructokinase type C OS=Rattus norvegicus GN=Pfkp PE=1 SV=2 - [K6PP_RAT]	83.1502	16.75	1	10	12	34	3.97873e+06	788	85.6654	7.28369
G3V945	Aldehyde dehydrogenase family 5, subfamily A1 OS=Rattus norvegicus GN=Aldh5a1 PE=3 SV=1 - [G3V945_RAT]	83.1289	26.58	4	11	11	31	8.4615e+06	523	56.1099	8.08936
D4ACB8	Chaperonin subunit 8 (Theta) (Predicted), isoform CRA_a OS=Rattus norvegicus GN=Cct8 PE=3 SV=1 - [D4ACB8_RAT]	83.074	31.39	1	16	16	32	9.61726e+06	548	59.5505	5.5415
P46101-2	Isoform DPPX-S of Dipeptidyl aminopeptidase-like protein 6 OS=Rattus norvegicus GN=Dpp6 - [DPP6_RAT]	82.8173	17.43	3	10	11	30	5.78011e+06	803	91.264	6.39209
P08009	Glutathione S-transferase Yb-3 OS=Rattus norvegicus GN=Gstm3 PE=1 SV=2 - [GSTM4_RAT]	79.0264	44.95	7	5	11	37	4.62233e+07	218	25.664	7.32764
P18484	AP-2 complex subunit alpha-2 OS=Rattus norvegicus GN=Ap2a2 PE=1 SV=3 - [AP2A2_RAT]	78.333	18.76	1	1	17	34	7.31911e+06	938	103.979	6.93213
P19511	ATP synthase subunit b, mitochondrial OS=Rattus norvegicus GN=Atp5f1 PE=1 SV=1 - [AT5F1_RAT]	77.4988	26.95	1	7	7	35	4.12295e+07	256	28.8505	9.36377
P68511	14-3-3 protein eta OS=Rattus norvegicus GN=Ywhah PE=1 SV=2 - [1433F_RAT]	77.3999	29.27	4	4	7	30	2.93205e+07	246	28.194	4.89404
P09951-2	Isoform IB of Synapsin-1 OS=Rattus norvegicus GN=Syn1 - [SYN1_RAT]	75.4197	22.46	2	10	11	30	4.78769e+06	668	69.8665	9.83252
P61983	14-3-3 protein gamma OS=Rattus norvegicus GN=Ywhag PE=1 SV=2 - [1433G_RAT]	73.7637	28.34	4	4	7	31	3.15573e+07	247	28.2849	4.89404
F1LRW6	Plasma membrane calcium-transporting ATPase 1 OS=Rattus norvegicus GN=Atp2b1 PE=2 SV=1 - [F1LRW6_RAT]	73.625	16.82	9	6	17	31	7.04252e+06	1171	129.019	6.30322
Q6P136	Hyou1 protein OS=Rattus norvegicus GN=Hyou1 PE=2 SV=1 - [Q6P136_RAT]	73.1974	15.33	3	13	13	29	1.13163e+07	998	111.151	5.18604
B0BMW0	RAB14, member RAS oncogene family OS=Rattus norvegicus GN=Rab14 PE=2 SV=1 - [B0BMW0_RAT]	73.1123	49.3	10	9	10	32	4.42448e+07	215	23.8819	6.21436
P02770	Serum albumin OS=Rattus norvegicus GN=Alb PE=1 SV=2 - [ALBU_RAT]	72.9731	29.44	1	15	15	27	6.94687e+06	608	68.6861	6.48096
P14408-2	Isoform Cytoplasmic of Fumarate hydratase, mitochondrial OS=Rattus norvegicus GN=Fh - [FUMH_RAT]	72.9579	31.69	7	14	14	32	1.32648e+07	467	50.1377	8.19189
G3V9N8	AP-1 complex subunit beta-1 OS=Rattus norvegicus GN=Ap1b1 PE=4 SV=2 - [G3V9N8_RAT]	72.7805	17.52	3	4	16	42	1.31104e+07	942	103.758	5.17334
Q63537-2	Isoform IIb of Synapsin-2 OS=Rattus norvegicus GN=Syn2 - [SYN2_RAT]	72.1447	23.17	3	7	8	29	6.82594e+06	479	52.4214	7.94287
Q6IFW6	Keratin, type I cytoskeletal 10 OS=Rattus norvegicus GN=Krt10 PE=2 SV=1 - [K1C10_RAT]	70.8147	13.12	15	6	8	35	2.51543e+07	526	56.4705	5.14795
Q10758	Keratin, type II cytoskeletal 8 OS=Rattus norvegicus GN=Krt8 PE=1 SV=3 - [K2C8_RAT]	70.5834	29.19	20	11	16	35	1.95008e+07	483	53.9853	5.99854
P62824	Ras-related protein Rab-3C OS=Rattus norvegicus GN=Rab3c PE=1 SV=1 - [RAB3C_RAT]	70.296	40.53	9	4	8	32	6.15722e+07	227	25.8556	5.23682
Q6P7A7	Dolichyl-diphosphooligosaccharide--protein glycosyltransferase subunit 1 OS=Rattus norvegicus GN=Rpn1 PE=2 SV=1 - [Q6P7A7_RAT]	70.169	28.22	2	17	17	35	7.95171e+06	606	68.3586	6.50732
D3ZUY8	Adaptor protein complex AP-2, alpha 1 subunit (Predicted) OS=Rattus norvegicus GN=Ap2a1 PE=4 SV=1 - [D3ZUY8_RAT]	69.7684	15.86	1	9	15	32	7.31911e+06	977	107.607	7.06396
P04897	Guanine nucleotide-binding protein G(i) subunit alpha-2 OS=Rattus norvegicus GN=Gnai2 PE=1 SV=3 - [GNAI2_RAT]	67.845	30.99	8	4	9	26	2.02799e+07	355	40.4731	5.45264
Q4V7C7	Actin-related protein 3 OS=Rattus norvegicus GN=Actr3 PE=1 SV=1 - [ARP3_RAT]	67.326	24.64	2	7	9	28	1.12284e+07	418	47.327	5.88428
P31647	Sodium- and chloride-dependent GABA transporter 3 OS=Rattus norvegicus GN=Slc6a11 PE=2 SV=1 - [S6A11_RAT]	67.1697	14.83	11	10	10	31	3.49595e+07	627	69.9003	6.97607
M0RAQ6	Uncharacterized protein OS=Rattus norvegicus PE=4 SV=1 - [M0RAQ6_RAT]	66.8521	20.91	3	1	18	34	8.30098e+06	880	97.9557	6.87354
P52555	Endoplasmic reticulum resident protein 29 OS=Rattus norvegicus GN=Erp29 PE=1 SV=2 - [ERP29_RAT]	66.704	31.15	2	7	7	24	1.26868e+07	260	28.5569	6.62451
Q8K422	Pro-opiomelanocortin OS=Rattus norvegicus GN=Pomc PE=2 SV=1 - [Q8K422_RAT]	66.281	38.72	2	6	6	23	7.16423e+06	235	26.5532	8.07471
G3V6H0	Protein LOC100363782 OS=Rattus norvegicus GN=LOC100363782 PE=3 SV=1 - [G3V6H0_RAT]	66.2708	45.27	11	3	9	29	6.7934e+07	201	22.1632	5.73193
P61765	Syntaxin-binding protein 1 OS=Rattus norvegicus GN=Stxbp1 PE=1 SV=1 - [STXB1_RAT]	66.0594	23.4	2	12	12	24	6.58714e+06	594	67.5259	6.96143
Q9JKB7	Guanine deaminase OS=Rattus norvegicus GN=Gda PE=2 SV=1 - [Q9JKB7_RAT]	65.8067	26.21	2	10	10	26	1.10019e+07	454	50.8687	5.71924
P97536	Cullin-associated NEDD8-dissociated protein 1 OS=Rattus norvegicus GN=Cand1 PE=1 SV=1 - [CAND1_RAT]	65.5309	13.09	1	15	15	32	3.95391e+06	1230	136.275	5.78271
M0RBJ7	Complement C3 OS=Rattus norvegicus GN=C3 PE=4 SV=1 - [M0RBJ7_RAT]	65.5258	11.55	3	16	16	28	2.82023e+06	1662	186.118	6.46826
Q63941	Ras-related protein Rab-3B OS=Rattus norvegicus GN=Rab3b PE=1 SV=2 - [RAB3B_RAT]	65.4121	34.25	11	2	7	31	6.15722e+07	219	24.7691	5.021
P13638	Sodium/potassium-transporting ATPase subunit beta-2 OS=Rattus norvegicus GN=Atp1b2 PE=2 SV=1 - [AT1B2_RAT]	65.3432	23.79	2	7	7	24	1.0823e+07	290	33.3905	8.30908
P05708	Hexokinase-1 OS=Rattus norvegicus GN=Hk1 PE=1 SV=4 - [HXK1_RAT]	65.0637	21.24	3	3	20	35	9.09006e+06	918	102.342	6.7124
P21707	Synaptotagmin-1 OS=Rattus norvegicus GN=Syt1 PE=1 SV=3 - [SYT1_RAT]	64.6676	22.33	2	7	9	29	1.46581e+07	421	47.3687	8.41162
Q64568-12	Isoform ZF of Plasma membrane calcium-transporting ATPase 3 OS=Rattus norvegicus GN=Atp2b3 - [AT2B3_RAT]	64.4674	13.54	15	4	12	26	7.04252e+06	1115	122.788	5.79541
P13221	Aspartate aminotransferase, cytoplasmic OS=Rattus norvegicus GN=Got1 PE=1 SV=3 - [AATC_RAT]	64.3807	29.78	1	10	11	24	1.17927e+07	413	46.3995	7.21045
Q68FY0	Cytochrome b-c1 complex subunit 1, mitochondrial OS=Rattus norvegicus GN=Uqcrc1 PE=1 SV=1 - [QCR1_RAT]	64.2015	21.46	1	10	10	28	1.81186e+07	480	52.8154	5.88428
Q6P6Q2	Keratin, type II cytoskeletal 5 OS=Rattus norvegicus GN=Krt5 PE=1 SV=1 - [K2C5_RAT]	63.6655	15.8	25	5	11	32	2.09145e+07	576	61.7877	7.79639
Q66HM2	AP-2 complex subunit alpha-2 OS=Rattus norvegicus GN=Ap2a2 PE=1 SV=1 - [Q66HM2_RAT]	63.078	18.85	1	1	17	29	7.31911e+06	939	104.108	6.82959
Q68FX0	Isocitrate dehydrogenase [NAD] subunit beta, mitochondrial OS=Rattus norvegicus GN=Idh3B PE=1 SV=1 - [IDH3B_RAT]	62.2121	28.57	2	10	10	32	2.25102e+07	385	42.3268	8.74854
Q4FZT9	26S proteasome non-ATPase regulatory subunit 2 OS=Rattus norvegicus GN=Psmd2 PE=2 SV=1 - [PSMD2_RAT]	61.9524	16.96	1	15	15	30	3.14978e+06	908	100.124	5.19873
P11598	Protein disulfide-isomerase A3 OS=Rattus norvegicus GN=Pdia3 PE=1 SV=2 - [PDIA3_RAT]	61.4472	29.31	1	13	13	33	9.76492e+06	505	56.5877	6.21436
Q6LDP3	Rat glutathione S-transferase OS=Rattus norvegicus GN=Gstm1 PE=2 SV=1 - [Q6LDP3_RAT]	61.3692	39.35	6	4	11	32	3.72855e+07	216	25.669	8.19189
P07340	Sodium/potassium-transporting ATPase subunit beta-1 OS=Rattus norvegicus GN=Atp1b1 PE=1 SV=1 - [AT1B1_RAT]	61.2754	32.57	1	9	9	34	7.53798e+07	304	35.179	8.646
P27605	Hypoxanthine-guanine phosphoribosyltransferase OS=Rattus norvegicus GN=Hprt1 PE=1 SV=1 - [HPRT_RAT]	61.0481	42.2	3	7	8	22	1.44022e+07	218	24.4615	6.53662
D4A0F5	Septin-7 OS=Rattus norvegicus GN=Sept7 PE=2 SV=2 - [D4A0F5_RAT]	60.431	23.17	7	10	11	25	8.40473e+06	436	50.5759	8.57275
Q2TA68	Dynamin-like 120 kDa protein, mitochondrial OS=Rattus norvegicus GN=Opa1 PE=1 SV=1 - [OPA1_RAT]	59.9243	18.33	4	16	16	27	4.49085e+06	960	111.238	7.53271
Q60587	Trifunctional enzyme subunit beta, mitochondrial OS=Rattus norvegicus GN=Hadhb PE=1 SV=1 - [ECHB_RAT]	59.4552	23.37	4	12	12	31	2.00314e+07	475	51.3815	9.46631
O35509	Ras-related protein Rab-11B OS=Rattus norvegicus GN=Rab11b PE=2 SV=4 - [RB11B_RAT]	58.2743	34.86	3	7	8	29	1.07812e+07	218	24.4735	5.93506
P62815	V-type proton ATPase subunit B, brain isoform OS=Rattus norvegicus GN=Atp6v1b2 PE=1 SV=1 - [VATB2_RAT]	56.4795	27.4	2	11	11	29	1.11919e+07	511	56.5149	5.80811
Q02563	Synaptic vesicle glycoprotein 2A OS=Rattus norvegicus GN=Sv2a PE=1 SV=2 - [SV2A_RAT]	56.412	9.7	1	6	6	26	6.43362e+06	742	82.6079	5.56689
D3ZQQ5	Dynamin-1 OS=Rattus norvegicus GN=Dnm1 PE=2 SV=2 - [D3ZQQ5_RAT]	56.2522	16.92	10	10	15	26	1.10585e+07	851	95.8002	6.7417
Q5XIH3	NADH dehydrogenase (Ubiquinone) flavoprotein 1 OS=Rattus norvegicus GN=Ndufv1 PE=2 SV=1 - [Q5XIH3_RAT]	56.0901	24.78	1	11	11	25	1.38985e+07	464	50.6986	8.07471
M0R5J4	Uncharacterized protein OS=Rattus norvegicus PE=4 SV=1 - [M0R5J4_RAT]	56.0341	32.26	9	8	14	30	1.22549e+07	434	47.0452	6.3667
Q3MIE4	Synaptic vesicle membrane protein VAT-1 homolog OS=Rattus norvegicus GN=Vat1 PE=1 SV=1 - [VAT1_RAT]	55.8307	21.78	1	8	8	23	8.63882e+06	404	43.091	6.62451
O88752	Epsilon 1 globin OS=Rattus norvegicus GN=Hbe1 PE=2 SV=1 - [O88752_RAT]	54.8844	12.24	1	1	2	26	1.46525e+08	147	16.0945	8.17725
G3V6S0	Protein Sptbn1 OS=Rattus norvegicus GN=Sptbn1 PE=4 SV=2 - [G3V6S0_RAT]	54.8208	8.53	7	17	18	23	3.19681e+06	2357	273.317	5.71924
P11506-5	Isoform ZA of Plasma membrane calcium-transporting ATPase 2 OS=Rattus norvegicus GN=Atp2b2 - [AT2B2_RAT]	54.7433	11.7	20	4	12	25	7.04252e+06	1154	127.276	6.31592
Q641Y2	NADH dehydrogenase [ubiquinone] iron-sulfur protein 2, mitochondrial OS=Rattus norvegicus GN=Ndufs2 PE=1 SV=1 - [NDUS2_RAT]	54.4674	24.62	1	10	10	22	1.10211e+07	463	52.5276	6.99072
P35280	Ras-related protein Rab-8A OS=Rattus norvegicus GN=Rab8a PE=2 SV=2 - [RAB8A_RAT]	54.0995	34.78	12	2	7	26	7.31585e+07	207	23.6532	9.0708
Q6P502	T-complex protein 1 subunit gamma OS=Rattus norvegicus GN=Cct3 PE=1 SV=1 - [TCPG_RAT]	53.8696	24.95	2	12	12	23	5.42614e+06	545	60.6084	6.63916
P38983	40S ribosomal protein SA OS=Rattus norvegicus GN=Rpsa PE=1 SV=3 - [RSSA_RAT]	53.7492	25.08	2	6	6	17	1.37313e+07	295	32.8034	4.86865
F1LMW7	Myristoylated alanine-rich C-kinase substrate OS=Rattus norvegicus GN=Marcks PE=2 SV=2 - [F1LMW7_RAT]	53.6132	37.01	2	7	7	18	4.71442e+06	308	29.8709	4.36084
P84083	ADP-ribosylation factor 5 OS=Rattus norvegicus GN=Arf5 PE=1 SV=2 - [ARF5_RAT]	52.767	40	4	2	7	24	4.96165e+07	180	20.5166	6.78564
Q7TMC7	Ab2-417 OS=Rattus norvegicus GN=Tf PE=2 SV=1 - [Q7TMC7_RAT]	52.3434	15.42	7	13	13	23	1.86972e+06	979	107.343	8.00146
P15650	Long-chain specific acyl-CoA dehydrogenase, mitochondrial OS=Rattus norvegicus GN=Acadl PE=1 SV=1 - [ACADL_RAT]	52.0047	18.84	1	7	7	19	8.14743e+06	430	47.8424	7.73779
P07895	Superoxide dismutase [Mn], mitochondrial OS=Rattus norvegicus GN=Sod2 PE=1 SV=2 - [SODM_RAT]	51.2984	32.43	2	8	8	33	3.12379e+07	222	24.6586	8.80713
Q63716	Peroxiredoxin-1 OS=Rattus norvegicus GN=Prdx1 PE=1 SV=1 - [PRDX1_RAT]	51.2698	45.73	1	7	9	26	1.51356e+07	199	22.0953	8.1333
P53534	Glycogen phosphorylase, brain form (Fragment) OS=Rattus norvegicus GN=Pygb PE=1 SV=3 - [PYGB_RAT]	51.2389	21.84	4	12	16	23	9.76251e+06	838	96.1131	6.68311
Q64559-1	Isoform 1 of Cytosolic acyl coenzyme A thioester hydrolase OS=Rattus norvegicus GN=Acot7 - [BACH_RAT]	51.0834	19.23	3	6	7	24	1.01562e+07	338	37.5372	7.51807
P62909	40S ribosomal protein S3 OS=Rattus norvegicus GN=Rps3 PE=1 SV=1 - [RS3_RAT]	51.0078	47.74	2	11	11	24	7.49639e+06	243	26.6574	9.65674
P54311	Guanine nucleotide-binding protein G(I)/G(S)/G(T) subunit beta-1 OS=Rattus norvegicus GN=Gnb1 PE=1 SV=4 - [GBB1_RAT]	49.8625	27.06	23	3	9	24	2.01107e+07	340	37.353	5.99854
P50554	4-aminobutyrate aminotransferase, mitochondrial OS=Rattus norvegicus GN=Abat PE=1 SV=3 - [GABT_RAT]	48.5491	31.4	1	12	12	24	8.5736e+06	500	56.4194	7.92822
P30835	6-phosphofructokinase, liver type OS=Rattus norvegicus GN=Pfkl PE=2 SV=3 - [K6PL_RAT]	47.6437	10.26	2	3	6	14	2.37397e+06	780	85.2844	7.40088
P62716	Serine/threonine-protein phosphatase 2A catalytic subunit beta isoform OS=Rattus norvegicus GN=Ppp2cb PE=1 SV=1 - [PP2AB_RAT]	47.432	27.18	1	2	7	16	4.13985e+06	309	35.5523	5.42725
D3ZEN5	Peroxiredoxin-5, mitochondrial (Fragment) OS=Rattus norvegicus GN=Prdx5 PE=2 SV=2 - [D3ZEN5_RAT]	47.4056	46.58	3	6	6	18	1.20159e+07	161	16.9149	7.23975
P05712	Ras-related protein Rab-2A OS=Rattus norvegicus GN=Rab2a PE=1 SV=1 - [RAB2A_RAT]	47.2084	47.64	2	4	9	17	2.17094e+07	212	23.5207	6.53662
G3V741	Phosphate carrier protein, mitochondrial OS=Rattus norvegicus GN=Slc25a3 PE=3 SV=1 - [G3V741_RAT]	46.5656	28.37	3	10	10	24	2.53884e+07	356	39.5054	9.26123
Q9WVB1	Ras-related protein Rab-6A OS=Rattus norvegicus GN=Rab6a PE=2 SV=2 - [RAB6A_RAT]	46.02	29.33	9	2	6	21	3.84186e+07	208	23.5749	5.5415
Q64057	Alpha-aminoadipic semialdehyde dehydrogenase OS=Rattus norvegicus GN=Aldh7a1 PE=1 SV=2 - [AL7A1_RAT]	45.8027	25.05	1	10	10	19	4.73905e+06	539	58.7114	7.86963
P07825	Synaptophysin OS=Rattus norvegicus GN=Syp PE=1 SV=1 - [SYPH_RAT]	45.7777	13.03	1	4	4	23	1.87424e+07	307	33.2891	5.021
Q498R3	DnaJ homolog subfamily C member 10 OS=Rattus norvegicus GN=Dnajc10 PE=2 SV=2 - [DJC10_RAT]	45.6657	12.74	1	10	10	19	3.30171e+06	793	90.6893	7.13721
G3V7J0	Aldehyde dehydrogenase family 6, subfamily A1, isoform CRA_b OS=Rattus norvegicus GN=Aldh6a1 PE=3 SV=1 - [G3V7J0_RAT]	45.6483	20.75	3	11	11	26	8.51407e+06	535	57.7105	8.17725
Q6P6V0	Glucose-6-phosphate isomerase OS=Rattus norvegicus GN=Gpi PE=1 SV=1 - [G6PI_RAT]	45.4141	16.85	1	8	8	21	7.26056e+06	558	62.7871	7.76709
P11507-2	Isoform SERCA2A of Sarcoplasmic/endoplasmic reticulum calcium ATPase 2 OS=Rattus norvegicus GN=Atp2a2 - [AT2A2_RAT]	45.168	13.54	12	7	11	21	1.08275e+07	997	109.61	5.36377
P85515	Alpha-centractin OS=Rattus norvegicus GN=Actr1a PE=1 SV=1 - [ACTZ_RAT]	45.0902	26.06	1	4	8	19	8.96425e+06	376	42.5869	6.63916
P08461	Dihydrolipoyllysine-residue acetyltransferase component of pyruvate dehydrogenase complex, mitochondrial OS=Rattus norvegicus GN=Dlat PE=1 SV=3 - [ODP2_RAT]	44.5772	20.41	2	10	10	20	1.44531e+07	632	67.1234	8.52881
Q5U2X8	Acyl-CoA thioesterase 9 OS=Rattus norvegicus GN=Acot9 PE=2 SV=1 - [Q5U2X8_RAT]	44.1953	20.05	1	8	8	19	7.67515e+06	439	50.4109	8.63135
P62828	GTP-binding nuclear protein Ran OS=Rattus norvegicus GN=Ran PE=1 SV=3 - [RAN_RAT]	44.0574	24.54	3	5	5	19	3.31926e+07	216	24.4076	7.48877
Q8VI04	Isoaspartyl peptidase/L-asparaginase OS=Rattus norvegicus GN=Asrgl1 PE=1 SV=1 - [ASGL1_RAT]	43.6249	24.62	1	7	7	19	6.74623e+06	333	34.3886	7.88428
Q5BJY9	Keratin, type I cytoskeletal 18 OS=Rattus norvegicus GN=Krt18 PE=1 SV=3 - [K1C18_RAT]	43.5808	19.62	13	8	9	22	3.728e+07	423	47.7323	5.26221
G3V990	Septin-5 OS=Rattus norvegicus GN=Gp1bb PE=4 SV=2 - [G3V990_RAT]	43.4164	30.34	4	1	9	20	7.38692e+06	356	41.0339	6.66846
F1LNF7	Isocitrate dehydrogenase [NAD] subunit alpha, mitochondrial OS=Rattus norvegicus GN=Idh3a PE=2 SV=1 - [F1LNF7_RAT]	43.3481	23.5	2	9	9	16	2.11494e+07	366	39.557	6.91748
O88989	Malate dehydrogenase, cytoplasmic OS=Rattus norvegicus GN=Mdh1 PE=1 SV=3 - [MDHC_RAT]	43.2994	19.76	1	6	6	18	1.6943e+07	334	36.46	6.58057
P04642	L-lactate dehydrogenase A chain OS=Rattus norvegicus GN=Ldha PE=1 SV=1 - [LDHA_RAT]	43.1299	25.6	6	6	9	20	2.54142e+07	332	36.4273	8.26514
Q68FR6	Elongation factor 1-gamma OS=Rattus norvegicus GN=Eef1g PE=1 SV=3 - [EF1G_RAT]	42.8625	16.7	2	8	8	23	8.20982e+06	437	50.0292	6.7417
F8WFI0	Taste receptor type 1 member 2 OS=Rattus norvegicus GN=Aldh4a1 PE=3 SV=2 - [F8WFI0_RAT]	42.7634	11.92	5	6	6	18	2.78074e+06	562	61.7586	8.04541
P15205	Microtubule-associated protein 1B OS=Rattus norvegicus GN=Map1b PE=1 SV=2 - [MAP1B_RAT]	42.453	4.03	3	7	8	14	1.81983e+07	2459	269.334	4.80518
Q45QL6	Guanine nucleotide binding protein beta 2 (Fragment) OS=Rattus norvegicus GN=Gnb2 PE=2 SV=1 - [Q45QL6_RAT]	42.3887	24.76	24	2	8	21	1.69731e+07	319	34.981	6.34131
P63331	Serine/threonine-protein phosphatase 2A catalytic subunit alpha isoform OS=Rattus norvegicus GN=Ppp2ca PE=1 SV=1 - [PP2AA_RAT]	42.33	27.18	1	2	7	15	3.99503e+06	309	35.5854	5.5415
P97852	Peroxisomal multifunctional enzyme type 2 OS=Rattus norvegicus GN=Hsd17b4 PE=1 SV=3 - [DHB4_RAT]	41.2366	11.7	2	7	7	14	4.21355e+06	735	79.378	8.57275
P10824	Guanine nucleotide-binding protein G(i) subunit alpha-1 OS=Rattus norvegicus GN=Gnai1 PE=1 SV=3 - [GNAI1_RAT]	41.1218	22.03	7	2	7	19	1.93216e+07	354	40.3192	5.97314
Q9JMG8	Dihydropyrimidinase-related protein OS=Rattus norvegicus GN=Dpysl5 PE=2 SV=1 - [Q9JMG8_RAT]	40.6786	18.12	3	9	9	19	6.33993e+06	563	61.3561	6.97607
D3ZDH8	Septin 5, isoform CRA_d OS=Rattus norvegicus GN=Sept5 PE=3 SV=1 - [D3ZDH8_RAT]	40.5293	27.78	2	1	9	19	7.38692e+06	378	43.8643	6.66846
B0BMW2	3-hydroxyacyl-CoA dehydrogenase type-2 OS=Rattus norvegicus GN=Hsd17b10 PE=2 SV=1 - [B0BMW2_RAT]	40.2401	27.2	2	6	6	17	6.04165e+06	261	27.2325	8.5874
O35095	Neurochondrin OS=Rattus norvegicus GN=Ncdn PE=1 SV=2 - [NCDN_RAT]	40.0787	12.21	1	8	8	16	3.37005e+06	729	78.8727	5.61768
P07936	Neuromodulin OS=Rattus norvegicus GN=Gap43 PE=1 SV=1 - [NEUM_RAT]	39.9706	40.27	1	7	7	14	1.93399e+06	226	23.5893	4.70361
D4A5X8	Protein Ahcyl1 OS=Rattus norvegicus GN=Ahcyl1 PE=3 SV=1 - [D4A5X8_RAT]	39.9101	22.53	5	10	11	27	9.06216e+06	475	52.8616	7.97217
P45592	Cofilin-1 OS=Rattus norvegicus GN=Cfl1 PE=1 SV=3 - [COF1_RAT]	39.8814	52.41	3	7	7	15	1.00811e+07	166	18.5207	8.08936
P47727	Carbonyl reductase [NADPH] 1 OS=Rattus norvegicus GN=Cbr1 PE=1 SV=2 - [CBR1_RAT]	39.7533	33.21	5	9	9	20	4.2673e+06	277	30.5589	8.06006
B3GNI6-3	Isoform 3 of Septin-11 OS=Rattus norvegicus GN=Sept11 - [SEP11_RAT]	39.6545	19.53	6	4	7	14	6.66673e+06	425	48.934	6.81494
P19234	NADH dehydrogenase [ubiquinone] flavoprotein 2, mitochondrial OS=Rattus norvegicus GN=Ndufv2 PE=1 SV=2 - [NDUV2_RAT]	39.356	31.85	1	6	6	16	1.04915e+07	248	27.3609	6.68311
P34926	Microtubule-associated protein 1A OS=Rattus norvegicus GN=Map1a PE=1 SV=1 - [MAP1A_RAT]	39.2077	3.82	3	7	9	17	4.60891e+07	2774	299.348	4.94482
M0R5T1	Uncharacterized protein (Fragment) OS=Rattus norvegicus PE=4 SV=1 - [M0R5T1_RAT]	39.1484	9.87	3	1	6	21	3.67284e+07	476	51.9139	7.69385
P70550	Ras-related protein Rab-8B OS=Rattus norvegicus GN=Rab8b PE=1 SV=1 - [RAB8B_RAT]	39.0875	28.02	11	1	6	22	7.31585e+07	207	23.5881	9.0708
P63329-2	Isoform 2 of Serine/threonine-protein phosphatase 2B catalytic subunit alpha isoform OS=Rattus norvegicus GN=Ppp3ca - [PP2BA_RAT]	38.9387	19.96	8	3	10	23	7.76346e+06	511	57.5778	6.30322
P52873	Pyruvate carboxylase, mitochondrial OS=Rattus norvegicus GN=Pc PE=1 SV=2 - [PYC_RAT]	38.9065	10.44	1	11	11	17	4.69196e+06	1178	129.695	6.81494
M0RC99	Protein LOC100361891 OS=Rattus norvegicus GN=LOC100361891 PE=4 SV=1 - [M0RC99_RAT]	38.7063	37.21	3	4	7	15	1.15882e+07	215	23.6098	8.14795
D3ZC55	Heat shock 70kDa protein 12A (Predicted), isoform CRA_a OS=Rattus norvegicus GN=Hspa12a PE=4 SV=1 - [D3ZC55_RAT]	38.396	19.26	1	10	10	14	4.35506e+06	675	74.7835	6.60986
Q45QM8	Guanine nucleotide binding protein alpha inhibiting 3 (Fragment) OS=Rattus norvegicus GN=Gnai3 PE=2 SV=1 - [Q45QM8_RAT]	38.1963	18.79	7	2	6	17	1.88685e+07	346	39.7039	5.8335
F1LVC3	Protein Rab6b OS=Rattus norvegicus GN=Rab6b PE=3 SV=2 - [F1LVC3_RAT]	38.1667	35.43	9	2	6	16	3.79469e+07	175	19.865	5.04639
P12007	Isovaleryl-CoA dehydrogenase, mitochondrial OS=Rattus norvegicus GN=Ivd PE=1 SV=2 - [IVD_RAT]	37.9432	14.39	1	6	6	16	6.66916e+06	424	46.4058	7.89893
Q6P6R2	Dihydrolipoyl dehydrogenase, mitochondrial OS=Rattus norvegicus GN=Dld PE=1 SV=1 - [DLDH_RAT]	37.9209	15.72	2	7	7	14	7.42184e+06	509	54.0041	7.86963
P19945	60S acidic ribosomal protein P0 OS=Rattus norvegicus GN=Rplp0 PE=1 SV=2 - [RLA0_RAT]	37.86	24.61	4	7	7	16	7.53768e+06	317	34.1938	6.25244
Q5RKJ9	RAB10, member RAS oncogene family OS=Rattus norvegicus GN=Rab10 PE=2 SV=1 - [Q5RKJ9_RAT]	37.8516	24	12	3	5	16	6.10292e+07	200	22.5266	8.38232
Q5BJT9	Creatine kinase, mitochondrial 1, ubiquitous OS=Rattus norvegicus GN=Ckmt1b PE=2 SV=1 - [Q5BJT9_RAT]	37.2808	19.14	5	6	7	12	1.78243e+07	418	46.9322	8.32373
Q6AYH5	Dynactin subunit 2 OS=Rattus norvegicus GN=Dctn2 PE=1 SV=1 - [DCTN2_RAT]	37.2308	23.63	1	7	7	11	2.62769e+06	402	44.1207	5.26221
Q4V8F6	Pcbp2 protein OS=Rattus norvegicus GN=Pcbp2 PE=2 SV=1 - [Q4V8F6_RAT]	36.3096	22.99	6	5	6	14	8.79828e+06	335	35.3242	8.00146
B0BNK1	Protein Rab5c OS=Rattus norvegicus GN=Rab5c PE=2 SV=1 - [B0BNK1_RAT]	36.2934	34.26	1	4	6	13	1.15716e+07	216	23.4108	8.41162
B1WC61	Acad9 protein OS=Rattus norvegicus GN=Acad9 PE=2 SV=1 - [B1WC61_RAT]	36.2311	14.4	2	8	8	16	2.33819e+06	625	68.7997	7.69385
Q7TPB1	T-complex protein 1 subunit delta OS=Rattus norvegicus GN=Cct4 PE=1 SV=3 - [TCPD_RAT]	36.1702	25.6	1	11	12	15	5.6336e+06	539	58.0628	8.01611
Q5XI78	2-oxoglutarate dehydrogenase, mitochondrial OS=Rattus norvegicus GN=Ogdh PE=1 SV=1 - [ODO1_RAT]	36.0266	9.38	1	7	8	14	4.41609e+06	1023	116.221	6.771
B5DFG5	Protein Sept6 OS=Rattus norvegicus GN=Sept6 PE=2 SV=1 - [B5DFG5_RAT]	35.7913	21.55	3	3	6	12	5.76049e+06	427	48.7478	6.66846
P23965	Enoyl-CoA delta isomerase 1, mitochondrial OS=Rattus norvegicus GN=Eci1 PE=1 SV=1 - [ECI1_RAT]	35.5515	24.91	3	6	6	13	3.01857e+06	289	32.234	9.53955
B0BNE5	S-formylglutathione hydrolase OS=Rattus norvegicus GN=Esd PE=1 SV=1 - [ESTD_RAT]	35.488	25.53	1	5	5	12	3.46802e+06	282	31.3434	6.90283
G3V7I5	Aldehyde dehydrogenase X, mitochondrial OS=Rattus norvegicus GN=Aldh1b1 PE=3 SV=1 - [G3V7I5_RAT]	35.222	14.07	2	5	6	12	1.11095e+07	519	57.6224	7.06396
Q07984	Translocon-associated protein subunit delta OS=Rattus norvegicus GN=Ssr4 PE=2 SV=1 - [SSRD_RAT]	35.1661	19.65	2	3	3	12	3.30333e+06	173	18.9675	5.78271
F1LLX6	Calcium-dependent secretion activator 1 OS=Rattus norvegicus GN=Cadps PE=4 SV=2 - [F1LLX6_RAT]	35.0003	9.15	8	9	9	14	1.64368e+06	1148	129.602	5.92236
F1M9V7	Protein Npepps OS=Rattus norvegicus GN=Npepps PE=2 SV=1 - [F1M9V7_RAT]	34.9615	15.43	3	13	13	16	3.52014e+06	920	103.279	5.77002
Q66HD0	Endoplasmin OS=Rattus norvegicus GN=Hsp90b1 PE=1 SV=2 - [ENPL_RAT]	34.759	12.31	2	9	10	17	9.63825e+06	804	92.7134	4.80518
O08651	D-3-phosphoglycerate dehydrogenase OS=Rattus norvegicus GN=Phgdh PE=1 SV=3 - [SERA_RAT]	34.4574	14.82	3	7	7	12	5.62148e+06	533	56.4572	6.7124
P20651	Serine/threonine-protein phosphatase 2B catalytic subunit beta isoform OS=Rattus norvegicus GN=Ppp3cb PE=2 SV=1 - [PP2BB_RAT]	34.0292	13.9	4	2	8	20	6.98679e+06	525	59.0755	5.90967
B1WBU9	Phosphorylase OS=Rattus norvegicus GN=Pygm PE=2 SV=1 - [B1WBU9_RAT]	34.0162	12.83	4	6	10	14	9.49635e+06	842	97.2607	7.10791
Q68FU3	Electron transfer flavoprotein subunit beta OS=Rattus norvegicus GN=Etfb PE=2 SV=3 - [ETFB_RAT]	33.8658	35.29	1	7	8	15	6.7284e+06	255	27.6701	7.75244
B2RZD6	Ndufa4 protein OS=Rattus norvegicus GN=Ndufa4 PE=4 SV=1 - [B2RZD6_RAT]	33.6978	54.88	1	5	5	16	3.09791e+07	82	9.32087	9.5249
P23358	60S ribosomal protein L12 OS=Rattus norvegicus GN=Rpl12 PE=2 SV=1 - [RL12_RAT]	33.6439	38.79	6	5	5	10	8.45753e+06	165	17.8346	9.42236
B2RYJ7	ARP1 actin-related protein 1 homolog B (Yeast) OS=Rattus norvegicus GN=Actr1b PE=2 SV=1 - [B2RYJ7_RAT]	33.592	21.81	1	2	6	14	8.93882e+06	376	42.2547	6.40479
G3V6U3	Asparagine-linked glycosylation 2 homolog (Yeast, alpha-1,3-mannosyltransferase), isoform CRA_a OS=Rattus norvegicus GN=Alg2 PE=4 SV=1 - [G3V6U3_RAT]	33.4809	15.9	2	6	6	13	5.22024e+06	415	47.2883	7.97217
P61589	Transforming protein RhoA OS=Rattus norvegicus GN=Rhoa PE=1 SV=1 - [RHOA_RAT]	33.398	35.75	4	3	7	13	7.00997e+06	193	21.7681	6.1001
P17764	Acetyl-CoA acetyltransferase, mitochondrial OS=Rattus norvegicus GN=Acat1 PE=1 SV=1 - [THIL_RAT]	33.3729	18.16	1	6	6	10	6.18876e+06	424	44.6664	8.76318
P04785	Protein disulfide-isomerase OS=Rattus norvegicus GN=P4hb PE=1 SV=2 - [PDIA1_RAT]	33.3464	22.99	2	11	11	16	2.80437e+06	509	56.9157	4.93213
Q91XU8	Phosphatidate cytidylyltransferase 2 OS=Rattus norvegicus GN=Cds2 PE=2 SV=1 - [CDS2_RAT]	33.309	12.64	2	4	4	14	5.45059e+06	443	51.2888	7.04932
Q5M7U6	Actin-related protein 2 OS=Rattus norvegicus GN=Actr2 PE=1 SV=1 - [ARP2_RAT]	33.1141	23.6	18	10	10	18	9.14214e+06	394	44.7052	6.7417
Q5XHZ0	Heat shock protein 75 kDa, mitochondrial OS=Rattus norvegicus GN=Trap1 PE=1 SV=1 - [TRAP1_RAT]	33.0789	14.16	1	7	8	11	1.39396e+07	706	80.4108	7.03467
D4A0T0	Protein Ndufb10 OS=Rattus norvegicus GN=Ndufb10 PE=4 SV=1 - [D4A0T0_RAT]	32.8382	39.77	2	6	6	14	2.42299e+06	176	20.8454	7.69385
Q7M0E3	Destrin OS=Rattus norvegicus GN=Dstn PE=1 SV=3 - [DEST_RAT]	32.8333	20.61	2	5	5	12	5.92516e+06	165	18.5215	8.03076
Q6IG02	Keratin, type II cytoskeletal 2 epidermal OS=Rattus norvegicus GN=Krt2 PE=2 SV=1 - [K22E_RAT]	32.591	5.69	1	2	4	14	1.05371e+07	685	69.0852	7.69385
P29266	3-hydroxyisobutyrate dehydrogenase, mitochondrial OS=Rattus norvegicus GN=Hibadh PE=1 SV=3 - [3HIDH_RAT]	32.5257	16.42	1	4	4	10	4.80522e+06	335	35.2796	8.47021
F1LPP0	Amphiphysin (Fragment) OS=Rattus norvegicus GN=Amph PE=2 SV=2 - [F1LPP0_RAT]	32.1376	13.09	15	7	7	13	4.20263e+06	657	71.8084	4.56396
Q9QXQ0	Alpha-actinin-4 OS=Rattus norvegicus GN=Actn4 PE=1 SV=2 - [ACTN4_RAT]	31.9426	9.99	10	7	7	10	1.99526e+06	911	104.849	5.43994
B2GVB4	Sept9 protein (Fragment) OS=Rattus norvegicus GN=Sept9 PE=2 SV=1 - [B2GVB4_RAT]	31.9348	16.55	6	9	9	16	5.17094e+06	550	61.993	8.1626
Q3B7V5	Protein Rab2b OS=Rattus norvegicus GN=Rab2b PE=2 SV=1 - [Q3B7V5_RAT]	31.7808	28.84	2	1	6	12	1.44848e+07	215	24.07	6.78564
G3V7I0	Peroxiredoxin 3 OS=Rattus norvegicus GN=Prdx3 PE=4 SV=1 - [G3V7I0_RAT]	31.3377	15.95	2	4	4	16	1.22901e+07	257	28.2815	7.54736
Q05140-2	Isoform 2 of Clathrin coat assembly protein AP180 OS=Rattus norvegicus GN=Snap91 - [AP180_RAT]	31.1588	5.69	3	2	4	10	2.3478e+06	896	91.3734	4.91943
P61980	Heterogeneous nuclear ribonucleoprotein K OS=Rattus norvegicus GN=Hnrnpk PE=1 SV=1 - [HNRPK_RAT]	30.7352	15.77	3	6	6	13	2.46642e+06	463	50.9444	5.5415
Q6IFV1	Keratin, type I cytoskeletal 14 OS=Rattus norvegicus GN=Krt14 PE=2 SV=1 - [K1C14_RAT]	30.7036	7.84	16	1	4	13	1.88125e+07	485	52.6509	5.16064
G3V6S5	C-1-tetrahydrofolate synthase, cytoplasmic OS=Rattus norvegicus GN=Mthfd1 PE=3 SV=1 - [G3V6S5_RAT]	30.6428	9.3	4	7	7	12	1.97338e+06	935	100.902	7.41553
Q5FVH2	Phospholipase D3 OS=Rattus norvegicus GN=Pld3 PE=2 SV=1 - [PLD3_RAT]	30.5776	10.45	1	5	5	15	1.68909e+07	488	54.3644	6.52197
Q920L2	Succinate dehydrogenase [ubiquinone] flavoprotein subunit, mitochondrial OS=Rattus norvegicus GN=Sdha PE=1 SV=1 - [DHSA_RAT]	30.5568	13.26	2	7	7	13	4.67604e+06	656	71.5697	7.1665
O35142	Coatomer subunit beta' OS=Rattus norvegicus GN=Copb2 PE=1 SV=3 - [COPB2_RAT]	30.4694	8.4	3	7	7	12	2.08916e+06	905	102.486	5.2749
Q5U316	Ras-related protein Rab-35 OS=Rattus norvegicus GN=Rab35 PE=2 SV=1 - [RAB35_RAT]	30.4257	15.42	10	1	3	12	5.96341e+07	201	23.0108	8.29443
Q52KS1	6-phosphofructokinase OS=Rattus norvegicus GN=Pfkm PE=2 SV=1 - [Q52KS1_RAT]	30.4009	12.56	2	6	8	11	4.76649e+06	780	85.2886	7.88428
Q64715	Microtubule-associated protein OS=Rattus norvegicus GN=Map2 PE=2 SV=1 - [Q64715_RAT]	30.3304	4.99	8	8	8	12	1.71728e+06	1825	198.446	4.84326
Q63560	Microtubule-associated protein 6 OS=Rattus norvegicus GN=Map6 PE=1 SV=1 - [MAP6_RAT]	30.3054	18.7	3	7	8	10	1.23338e+06	952	100.423	9.43701
Q63028	Alpha-adducin OS=Rattus norvegicus GN=Add1 PE=1 SV=2 - [ADDA_RAT]	30.2914	12.93	3	7	7	11	2.97454e+06	735	80.3053	6.15088
A1L1J8	Protein Rab5b OS=Rattus norvegicus GN=Rab5b PE=2 SV=1 - [A1L1J8_RAT]	30.177	38.14	1	4	7	12	1.14164e+07	215	23.6599	8.1333
Q9JLA3	UDP-glucose:glycoprotein glucosyltransferase 1 OS=Rattus norvegicus GN=Uggt1 PE=1 SV=2 - [UGGG1_RAT]	29.9598	7.03	1	10	10	14	1.64256e+06	1551	176.32	5.65576
D3ZCZ9	Protein LOC100912599 OS=Rattus norvegicus GN=LOC679739 PE=4 SV=1 - [D3ZCZ9_RAT]	29.8158	41.38	3	5	5	12	2.382e+06	116	13.0317	9.21729
P20788	Cytochrome b-c1 complex subunit Rieske, mitochondrial OS=Rattus norvegicus GN=Uqcrfs1 PE=1 SV=2 - [UCRI_RAT]	29.5995	14.23	1	4	4	13	8.20283e+06	274	29.4272	8.86572
E9PTI1	Protein Atp6v1h OS=Rattus norvegicus GN=Atp6v1h PE=2 SV=1 - [E9PTI1_RAT]	29.4903	14.97	2	6	6	12	4.03857e+06	441	50.7926	6.68311
Q9JHY2	Sideroflexin-3 OS=Rattus norvegicus GN=Sfxn3 PE=2 SV=1 - [SFXN3_RAT]	29.2702	20.56	3	4	5	12	4.27962e+06	321	35.4106	9.74463
Q66HA8	Heat shock protein 105 kDa OS=Rattus norvegicus GN=Hsph1 PE=1 SV=1 - [HS105_RAT]	28.907	12.35	1	8	9	12	1.61394e+06	858	96.3574	5.5542
Q9JJ31	Cullin-5 OS=Rattus norvegicus GN=Cul5 PE=1 SV=3 - [CUL5_RAT]	28.8901	9.23	1	7	7	13	2.36942e+06	780	90.8323	7.94287
G3V9G4	ATP citrate lyase, isoform CRA_b OS=Rattus norvegicus GN=Acly PE=4 SV=1 - [G3V9G4_RAT]	28.6261	9.81	5	8	9	13	1.56883e+06	1091	119.637	7.44482
P38650	Cytoplasmic dynein 1 heavy chain 1 OS=Rattus norvegicus GN=Dync1h1 PE=1 SV=1 - [DYHC1_RAT]	28.5927	2.89	3	13	13	14	1.21226e+06	4644	531.916	6.45557
M0R5G1	Uncharacterized protein OS=Rattus norvegicus PE=4 SV=1 - [M0R5G1_RAT]	28.1725	11.78	2	1	6	20	2.17643e+07	433	48.1267	7.41553
Q5FVI4	Cell cycle exit and neuronal differentiation protein 1 OS=Rattus norvegicus GN=Cend1 PE=1 SV=1 - [CEND_RAT]	28.1618	23.49	1	3	3	9	2.12074e+06	149	15.0339	8.96826
M0R5K9	Protein LOC100912024 (Fragment) OS=Rattus norvegicus GN=LOC100912024 PE=4 SV=1 - [M0R5K9_RAT]	27.9519	38.41	7	6	6	11	8.52739e+06	151	17.6438	11.1069
P05197	Elongation factor 2 OS=Rattus norvegicus GN=Eef2 PE=1 SV=4 - [EF2_RAT]	27.7672	12	4	10	10	15	5.38569e+06	858	95.2229	6.82959
Q5XI73	Rho GDP-dissociation inhibitor 1 OS=Rattus norvegicus GN=Arhgdia PE=1 SV=1 - [GDIR1_RAT]	27.7241	28.43	1	4	4	9	5.9542e+06	204	23.3928	5.19873
Q66H80	Coatomer subunit delta OS=Rattus norvegicus GN=Arcn1 PE=2 SV=1 - [COPD_RAT]	27.7201	13.31	1	6	6	13	1.38786e+06	511	57.1632	6.21436
Q794F9	4F2 cell-surface antigen heavy chain OS=Rattus norvegicus GN=Slc3a2 PE=1 SV=1 - [4F2_RAT]	27.7143	14.42	1	6	6	10	7.87646e+06	527	58.0361	5.32568
P28480	T-complex protein 1 subunit alpha OS=Rattus norvegicus GN=Tcp1 PE=1 SV=1 - [TCPA_RAT]	27.6821	14.75	2	9	9	14	6.76941e+06	556	60.3217	6.21436
P62836	Ras-related protein Rap-1A OS=Rattus norvegicus GN=Rap1a PE=1 SV=1 - [RAP1A_RAT]	27.5944	22.28	2	1	4	11	1.17725e+07	184	20.9737	6.66846
B0BNJ1	LOC683667 protein OS=Rattus norvegicus GN=Sri PE=2 SV=1 - [B0BNJ1_RAT]	27.5863	39.9	1	7	7	22	2.43818e+07	198	21.6103	5.89697
Q5XI34	Protein Ppp2r1a OS=Rattus norvegicus GN=Ppp2r1a PE=2 SV=1 - [Q5XI34_RAT]	27.5437	12.56	2	7	7	12	3.49941e+06	589	65.2809	5.10986
Q64548-2	Isoform RTN1-S of Reticulon-1 OS=Rattus norvegicus GN=Rtn1 - [RTN1_RAT]	27.4095	19.23	1	1	4	15	5.26104e+06	208	23.5426	8.90967
P63095	Guanine nucleotide-binding protein G(s) subunit alpha isoforms short OS=Rattus norvegicus GN=Gnas PE=1 SV=1 - [GNAS2_RAT]	27.2533	16.75	12	5	6	11	1.8352e+07	394	45.6349	5.96045
G3V7L8	ATPase, H+ transporting, V1 subunit E isoform 1, isoform CRA_a OS=Rattus norvegicus GN=Atp6v1e1 PE=3 SV=1 - [G3V7L8_RAT]	27.1284	32.3	4	8	9	11	7.32345e+06	226	26.1268	8.42627
D4A376	Ras-related protein Rab-12 OS=Rattus norvegicus GN=LOC100362985 PE=2 SV=2 - [D4A376_RAT]	27.0104	11.76	10	1	2	10	5.24903e+07	187	20.8548	9.30518
P13803	Electron transfer flavoprotein subunit alpha, mitochondrial OS=Rattus norvegicus GN=Etfa PE=1 SV=4 - [ETFA_RAT]	26.984	24.62	1	6	6	14	4.56225e+06	333	34.9295	8.38232
G3V6L4	Kinesin heavy chain isoform 5C (Fragment) OS=Rattus norvegicus GN=Kif5c PE=4 SV=2 - [G3V6L4_RAT]	26.9554	8.32	3	4	6	10	857446	914	104.412	6.12549
Q68FR9	Elongation factor 1-delta OS=Rattus norvegicus GN=Eef1d PE=1 SV=2 - [EF1D_RAT]	26.9479	30.25	2	6	6	12	2.9782e+06	281	31.3109	5.05908
P04652	Thyrotropin subunit beta OS=Rattus norvegicus GN=Tshb PE=2 SV=2 - [TSHB_RAT]	26.6943	21.74	2	2	3	11	1.40143e+07	138	15.4942	7.44482
Q5RJN0	NADH dehydrogenase (Ubiquinone) Fe-S protein 7 OS=Rattus norvegicus GN=Ndufs7 PE=2 SV=1 - [Q5RJN0_RAT]	26.4761	23.85	1	4	4	8	6.13206e+06	218	23.9294	9.99365
P13264-2	Isoform 2 of Glutaminase kidney isoform, mitochondrial OS=Rattus norvegicus GN=Gls - [GLSK_RAT]	26.3253	14.43	3	6	6	11	4.43643e+06	603	65.9541	8.11865
Q3KR86	Mitochondrial inner membrane protein (Fragment) OS=Rattus norvegicus GN=Immt PE=1 SV=1 - [IMMT_RAT]	26.2221	13.14	1	6	6	9	1.69858e+06	609	67.1352	5.79541
Q4FZU2	Keratin, type II cytoskeletal 6A OS=Rattus norvegicus GN=Krt6a PE=1 SV=1 - [K2C6A_RAT]	26.1523	6.52	21	1	4	12	3.66612e+07	552	59.2127	7.94287
Q5XII0	Mammalian ependymin-related protein 1 OS=Rattus norvegicus GN=Epdr1 PE=2 SV=1 - [EPDR1_RAT]	26.1478	29.02	1	6	6	10	7.82133e+06	224	25.6229	7.57666
Q5XIF3	NADH dehydrogenase [ubiquinone] iron-sulfur protein 4, mitochondrial OS=Rattus norvegicus GN=Ndufs4 PE=1 SV=1 - [NDUS4_RAT]	26.0781	19.43	1	3	3	13	7.83973e+06	175	19.7282	10.1401
Q9ER24	Ataxin-10 OS=Rattus norvegicus GN=Atxn10 PE=1 SV=1 - [ATX10_RAT]	25.9717	12.84	1	5	5	9	1.7354e+06	475	53.6925	5.14795
Q00981	Ubiquitin carboxyl-terminal hydrolase isozyme L1 OS=Rattus norvegicus GN=Uchl1 PE=1 SV=2 - [UCHL1_RAT]	25.9079	29.15	1	5	5	15	8.31946e+06	223	24.8224	5.23682
G3V7X2	Secretogranin 2, isoform CRA_a OS=Rattus norvegicus GN=Scg2 PE=4 SV=1 - [G3V7X2_RAT]	25.8523	11.79	4	6	6	12	2.73075e+06	619	70.9574	4.77979
G3V6P2	Dihydrolipoamide S-succinyltransferase (E2 component of 2-oxo-glutarate complex), isoform CRA_a OS=Rattus norvegicus GN=Dlst PE=3 SV=1 - [G3V6P2_RAT]	25.8414	14.76	4	7	7	12	7.03687e+06	454	48.8684	8.70459
O35303-4	Isoform 4 of Dynamin-1-like protein OS=Rattus norvegicus GN=Dnm1l - [DNM1L_RAT]	25.7193	12.03	7	6	7	10	1.80121e+06	748	83.1678	7.04932
Q62636	Ras-related protein Rap-1b OS=Rattus norvegicus GN=Rap1b PE=2 SV=2 - [RAP1B_RAT]	25.628	33.15	3	3	6	11	1.17725e+07	184	20.7846	5.78271
G3V712	Keratin complex 2, basic, gene 7, isoform CRA_a OS=Rattus norvegicus GN=Krt7 PE=3 SV=1 - [G3V712_RAT]	25.6244	5.91	21	1	4	17	1.84511e+07	457	50.7751	5.87158
P08050	Gap junction alpha-1 protein OS=Rattus norvegicus GN=Gja1 PE=1 SV=2 - [CXA1_RAT]	25.5075	14.14	1	4	4	8	1.3537e+06	382	43.0039	8.76318
D4AC23	Protein Cct7 OS=Rattus norvegicus GN=Cct7 PE=3 SV=1 - [D4AC23_RAT]	25.5049	22.61	1	12	12	17	5.84565e+06	544	59.6202	8.00146
Q561S0	NADH dehydrogenase [ubiquinone] 1 alpha subcomplex subunit 10, mitochondrial OS=Rattus norvegicus GN=Ndufa10 PE=1 SV=1 - [NDUAA_RAT]	25.4872	13.24	2	4	4	9	3.90789e+06	355	40.4676	7.79639
Q9Z1B2	Glutathione S-transferase Mu 5 OS=Rattus norvegicus GN=Gstm5 PE=1 SV=3 - [GSTM5_RAT]	25.3452	23.11	2	4	5	11	2.04003e+07	225	26.6111	6.75635
Q4V8H5	Aspartyl aminopeptidase OS=Rattus norvegicus GN=Dnpep PE=2 SV=1 - [Q4V8H5_RAT]	25.2903	12.21	1	4	4	8	1.20764e+06	475	52.5219	7.25439
P04906	Glutathione S-transferase P OS=Rattus norvegicus GN=Gstp1 PE=1 SV=2 - [GSTP1_RAT]	25.128	28.57	3	4	4	9	4.04847e+06	210	23.4241	7.35693
Q5GFD9	Protein IMPACT OS=Rattus norvegicus GN=Impact PE=2 SV=1 - [IMPCT_RAT]	25.0984	16.4	1	3	3	8	1.84302e+06	317	35.9722	5.16064
A0JPQ9	Chitinase domain-containing protein 1 OS=Rattus norvegicus GN=Chid1 PE=2 SV=2 - [CHID1_RAT]	24.8613	13.99	2	5	5	12	7.57734e+06	393	44.8463	7.97217
P35704	Peroxiredoxin-2 OS=Rattus norvegicus GN=Prdx2 PE=1 SV=3 - [PRDX2_RAT]	24.3968	30.81	1	6	6	11	1.11182e+07	198	21.7701	5.59229
P61751	ADP-ribosylation factor 4 OS=Rattus norvegicus GN=Arf4 PE=2 SV=2 - [ARF4_RAT]	24.3123	26.11	4	1	5	15	2.81154e+07	180	20.3836	7.13721
D4A830	Protein Ppa2 OS=Rattus norvegicus GN=Ppa2 PE=4 SV=1 - [D4A830_RAT]	24.3004	16.97	1	5	5	8	1.90077e+06	330	37.818	7.1665
Q3T1K5	F-actin-capping protein subunit alpha-2 OS=Rattus norvegicus GN=Capza2 PE=1 SV=1 - [CAZA2_RAT]	24.2215	24.48	1	4	5	11	7.89821e+06	286	32.9466	5.84619
D4A6G6	Protein LOC100362339 OS=Rattus norvegicus GN=LOC100362339 PE=4 SV=1 - [D4A6G6_RAT]	24.1761	28.28	8	3	4	10	1.35072e+07	145	16.1076	10.4038
Q6AYT3	tRNA-splicing ligase RtcB homolog OS=Rattus norvegicus PE=2 SV=1 - [RTCB_RAT]	24.1507	15.05	2	7	7	11	3.29469e+06	505	55.2139	7.2251
G3V8A5	Protein Vps35 OS=Rattus norvegicus GN=Vps35 PE=4 SV=1 - [G3V8A5_RAT]	23.9893	9.3	2	6	6	10	4.11917e+06	796	91.6688	5.43994
Q6P3V8	Eukaryotic translation initiation factor 4A1 OS=Rattus norvegicus GN=Eif4a1 PE=2 SV=1 - [Q6P3V8_RAT]	23.9469	10.59	2	4	4	9	3.7567e+06	406	46.1246	5.47803
Q68FQ0	T-complex protein 1 subunit epsilon OS=Rattus norvegicus GN=Cct5 PE=1 SV=1 - [TCPE_RAT]	23.911	19.04	2	10	11	15	7.83731e+06	541	59.4988	5.71924
P01186	Vasopressin-neurophysin 2-copeptin OS=Rattus norvegicus GN=Avp PE=1 SV=1 - [NEU2_RAT]	23.6022	25.6	1	1	2	6	1.33018e+06	168	17.9104	6.41748
D4A9E9	Uncharacterized protein OS=Rattus norvegicus PE=4 SV=2 - [D4A9E9_RAT]	23.5689	5.08	2	1	1	9		374	42.7678	8.19189
D3ZKD9	Microtubule-associated protein OS=Rattus norvegicus GN=Mapt PE=2 SV=2 - [D3ZKD9_RAT]	23.3619	14.44	16	5	5	10	3.01945e+06	374	39.119	9.49561
D4ABK1	Protein Syngr3 OS=Rattus norvegicus GN=Syngr3 PE=4 SV=1 - [D4ABK1_RAT]	23.3534	26.63	1	4	4	12	1.26744e+07	199	21.356	9.0415
Q3MHS9	Chaperonin containing Tcp1, subunit 6A (Zeta 1) OS=Rattus norvegicus GN=Cct6a PE=2 SV=1 - [Q3MHS9_RAT]	23.1422	16.2	6	7	7	11	6.7765e+06	531	57.9807	7.07861
B0BNE6	NADH dehydrogenase (Ubiquinone) Fe-S protein 8 (Predicted), isoform CRA_a OS=Rattus norvegicus GN=Ndufs8 PE=2 SV=1 - [B0BNE6_RAT]	22.9881	17.92	1	3	3	8	4.15207e+06	212	23.9547	6.21436
Q9EPC6	Profilin-2 OS=Rattus norvegicus GN=Pfn2 PE=1 SV=3 - [PROF2_RAT]	22.8374	36.43	2	4	4	8	4.06257e+06	140	14.9923	6.99072
P01179	Oxytocin-neurophysin 1 OS=Rattus norvegicus GN=Oxt PE=1 SV=2 - [NEU1_RAT]	22.5819	29.6	1	1	2	7	1.51023e+06	125	12.8137	5.43994
Q5EBA9	Suclg2 protein (Fragment) OS=Rattus norvegicus GN=Suclg2 PE=2 SV=1 - [Q5EBA9_RAT]	22.4778	18.35	5	6	6	8	2.29267e+06	387	41.6948	5.84619
Q6RUV5	Ras-related C3 botulinum toxin substrate 1 OS=Rattus norvegicus GN=Rac1 PE=1 SV=1 - [RAC1_RAT]	22.3516	30.21	5	4	5	10	6.41859e+06	192	21.4362	8.49951
P39052-3	Isoform 3 of Dynamin-2 OS=Rattus norvegicus GN=Dnm2 - [DYN2_RAT]	22.176	7.97	5	2	7	13	1.10585e+07	866	97.7569	7.62061
Q5FVG4	Protein LOC100911440 OS=Rattus norvegicus GN=Slc25a22 PE=2 SV=1 - [Q5FVG4_RAT]	22.1525	19.21	1	2	4	8	9.54737e+06	229	24.6238	8.60205
P70583	Deoxyuridine 5'-triphosphate nucleotidohydrolase OS=Rattus norvegicus GN=Dut PE=2 SV=3 - [DUT_RAT]	22.1252	37.07	2	6	6	8	962657	205	21.9893	8.77783
P28023	Dynactin subunit 1 OS=Rattus norvegicus GN=Dctn1 PE=2 SV=2 - [DCTN1_RAT]	22.0307	4.77	2	5	5	9	1.04529e+06	1280	141.842	5.74463
G3V7L6	26S protease regulatory subunit 7 OS=Rattus norvegicus GN=Psmc2 PE=3 SV=1 - [G3V7L6_RAT]	22.0141	12.93	2	5	5	10	1.43167e+06	433	48.6031	5.94775
D4AE68	Guanine nucleotide binding protein, alpha q polypeptide, isoform CRA_a OS=Rattus norvegicus GN=Gnaq PE=4 SV=2 - [D4AE68_RAT]	21.8568	17.27	5	3	5	8	6.89272e+06	359	42.1313	5.68115
Q62951	Dihydropyrimidinase-related protein 4 (Fragment) OS=Rattus norvegicus GN=Dpysl4 PE=1 SV=1 - [DPYL4_RAT]	21.7907	9.75	2	4	4	9	1.62107e+06	564	61.0471	6.771
O35244	Peroxiredoxin-6 OS=Rattus norvegicus GN=Prdx6 PE=1 SV=3 - [PRDX6_RAT]	21.7854	20.09	1	4	4	8	6.91273e+06	224	24.803	5.93506
B2GV73	Actin related protein 2/3 complex, subunit 3 OS=Rattus norvegicus GN=Arpc3 PE=2 SV=1 - [B2GV73_RAT]	21.7193	23.03	1	4	4	12	5.00083e+06	178	20.5223	8.60205
Q00715	Histone H2B type 1 OS=Rattus norvegicus PE=1 SV=2 - [H2B1_RAT]	21.4889	36	11	5	5	12	1.76247e+07	125	13.9816	10.3599
P70580	Membrane-associated progesterone receptor component 1 OS=Rattus norvegicus GN=Pgrmc1 PE=1 SV=3 - [PGRC1_RAT]	21.4246	25.13	1	2	3	7	1.59405e+06	195	21.5847	4.60205
P13086	Succinyl-CoA ligase [ADP/GDP-forming] subunit alpha, mitochondrial OS=Rattus norvegicus GN=Suclg1 PE=2 SV=2 - [SUCA_RAT]	21.3346	10.69	2	3	3	15	5.04536e+06	346	36.125	9.48096
P46844	Biliverdin reductase A OS=Rattus norvegicus GN=Blvra PE=1 SV=1 - [BIEA_RAT]	21.25	20.68	2	6	6	10	2.71669e+06	295	33.5445	6.12549
G3V9Z6	Septin 8 (Predicted) OS=Rattus norvegicus GN=Sept8 PE=3 SV=1 - [G3V9Z6_RAT]	21.156	6.99	4	2	3	8	4.34105e+06	429	49.8252	5.99854
P56571	ES1 protein homolog, mitochondrial OS=Rattus norvegicus PE=1 SV=2 - [ES1_RAT]	21.1456	22.93	1	4	4	11	3.0388e+06	266	28.1549	8.92432
F1LXA0	NADH dehydrogenase (Ubiquinone) 1 alpha subcomplex, 12 (Predicted), isoform CRA_b OS=Rattus norvegicus GN=Ndufa12 PE=4 SV=2 - [F1LXA0_RAT]	21.1328	33.79	1	4	4	8	4.35987e+06	145	17.1667	9.70068
B5DEN5	Eukaryotic translation elongation factor 1 beta 2 OS=Rattus norvegicus GN=Eef1b2 PE=2 SV=1 - [B5DEN5_RAT]	21.108	23.56	2	4	4	10	2.97978e+06	225	24.6603	4.71631
F1LW77	Protein Rab33b OS=Rattus norvegicus GN=Rab33b PE=3 SV=2 - [F1LW77_RAT]	21.0595	10.04	9	1	2	9	5.24959e+07	229	25.7358	7.69385
F8WFH8	Tryptophan--tRNA ligase, cytoplasmic OS=Rattus norvegicus GN=Wars PE=3 SV=1 - [F8WFH8_RAT]	20.9375	12	2	5	5	7	1.6462e+06	475	53.3927	6.60986
Q5M949	Nipsnap homolog 3A (C. elegans) OS=Rattus norvegicus GN=Nipsnap3b PE=2 SV=1 - [Q5M949_RAT]	20.9001	11.34	1	3	3	9	1.67896e+07	247	28.3224	9.23193
P10760	Adenosylhomocysteinase OS=Rattus norvegicus GN=Ahcy PE=1 SV=3 - [SAHH_RAT]	20.8552	13.66	3	5	6	10	5.19969e+06	432	47.5072	6.53662
Q0D2L6	Protein Rragc OS=Rattus norvegicus GN=Rragc PE=2 SV=1 - [Q0D2L6_RAT]	20.777	13.07	2	5	5	8	3.43214e+06	398	44.0788	5.09717
Q6Q0N1	Cytosolic non-specific dipeptidase OS=Rattus norvegicus GN=Cndp2 PE=1 SV=1 - [CNDP2_RAT]	20.7716	17.47	1	7	7	9	1.90204e+06	475	52.6596	5.65576
D3ZG43	NADH dehydrogenase (Ubiquinone) Fe-S protein 3 (Predicted), isoform CRA_c OS=Rattus norvegicus GN=Ndufs3 PE=3 SV=1 - [D3ZG43_RAT]	20.6791	18.94	1	5	5	11	1.10201e+07	264	30.2076	7.53271
B2RYN0	Pgm3 protein OS=Rattus norvegicus GN=Pgm3 PE=2 SV=1 - [B2RYN0_RAT]	20.6204	9.41	2	5	5	9	1.79041e+06	542	59.6473	6.23975
B2RYP0	Protein Rhoc OS=Rattus norvegicus GN=Rhoc PE=2 SV=1 - [B2RYP0_RAT]	20.5811	29.53	3	1	5	8	5.44301e+06	193	22.0223	6.58057
P30919	N(4)-(Beta-N-acetylglucosaminyl)-L-asparaginase OS=Rattus norvegicus GN=Aga PE=1 SV=2 - [ASPG_RAT]	20.5797	9.57	1	3	3	10	3.99054e+06	345	37.1434	7.18115
M0R544	Glucosidase, alpha, acid, isoform CRA_a OS=Rattus norvegicus GN=Gaa PE=4 SV=1 - [M0R544_RAT]	20.4829	5.98	2	5	5	9	2.03033e+06	953	106.136	5.68115
P51647	Retinal dehydrogenase 1 OS=Rattus norvegicus GN=Aldh1a1 PE=1 SV=3 - [AL1A1_RAT]	20.4777	14.17	3	5	6	7	8.49842e+06	501	54.424	7.82568
Q62991	Sec1 family domain-containing protein 1 OS=Rattus norvegicus GN=Scfd1 PE=1 SV=1 - [SCFD1_RAT]	20.4573	9.42	1	4	4	6	656434	637	72.2171	6.50732
Q9Z0V5	Peroxiredoxin-4 OS=Rattus norvegicus GN=Prdx4 PE=2 SV=1 - [PRDX4_RAT]	20.4408	10.62	1	1	3	8	9.78629e+06	273	30.9881	6.65381
Q5BJX2	Pdhx protein (Fragment) OS=Rattus norvegicus GN=Pdhx PE=2 SV=1 - [Q5BJX2_RAT]	20.3792	11.32	2	4	4	8	3.86363e+06	380	40.8647	8.68994
F1LY09	Protein Actr3b (Fragment) OS=Rattus norvegicus GN=Actr3b PE=2 SV=2 - [F1LY09_RAT]	20.3625	11.75	1	1	3	10	1.36006e+06	315	35.8104	6.44287
P26772	10 kDa heat shock protein, mitochondrial OS=Rattus norvegicus GN=Hspe1 PE=1 SV=3 - [CH10_RAT]	20.3251	41.18	3	4	4	7	1.01546e+07	102	10.8949	8.92432
P14841	Cystatin-C OS=Rattus norvegicus GN=Cst3 PE=1 SV=2 - [CYTC_RAT]	20.2847	24.29	2	3	3	7	6.41768e+06	140	15.4268	9.21729
F1LPW1	Inactive dipeptidyl peptidase 10 (Fragment) OS=Rattus norvegicus GN=Dpp10 PE=2 SV=2 - [F1LPW1_RAT]	20.2023	6	4	3	4	9	2.98756e+06	650	74.7137	6.56592
G3V6H5	Mitochondrial 2-oxoglutarate/malate carrier protein OS=Rattus norvegicus GN=Slc25a11 PE=3 SV=1 - [G3V6H5_RAT]	20.0522	21.34	2	6	6	8	4.70981e+06	314	34.1149	9.96436
G3V9U7	ATPase, Ca++ transporting, ubiquitous, isoform CRA_b OS=Rattus norvegicus GN=Atp2a3 PE=3 SV=1 - [G3V9U7_RAT]	19.9096	5.71	25	1	5	12	9.75623e+06	999	109.295	5.64307
B2GUZ5	F-actin-capping protein subunit alpha-1 OS=Rattus norvegicus GN=Capza1 PE=1 SV=1 - [CAZA1_RAT]	19.888	19.58	1	3	4	6	5.43909e+06	286	32.8893	5.69385
P25113	Phosphoglycerate mutase 1 OS=Rattus norvegicus GN=Pgam1 PE=1 SV=4 - [PGAM1_RAT]	19.8606	30.31	4	7	7	9	4.15455e+06	254	28.8139	7.18115
Q64548	Reticulon-1 OS=Rattus norvegicus GN=Rtn1 PE=2 SV=1 - [RTN1_RAT]	19.8413	7.08	2	2	5	13	4.90517e+06	777	82.9506	4.61475
F1LZW6	Protein Slc25a13 (Fragment) OS=Rattus norvegicus GN=Slc25a13 PE=3 SV=1 - [F1LZW6_RAT]	19.8291	7.56	1	1	5	10	9.30838e+06	675	74.3358	8.70459
Q63013	Testicular luteinizing hormone beta subunit OS=Rattus norvegicus GN=Lhb PE=2 SV=1 - [Q63013_RAT]	19.6903	33.75	3	2	2	8	1.59087e+07	80	8.50931	8.20654
E9PTW1	Protein Scamp3 OS=Rattus norvegicus GN=Scamp3 PE=2 SV=2 - [E9PTW1_RAT]	19.5719	11.43	2	3	3	6	888468	350	38.4722	6.75635
P08644-2	Isoform 2B of GTPase KRas OS=Rattus norvegicus GN=Kras - [RASK_RAT]	19.4699	26.6	3	2	4	9	6.49479e+06	188	21.4809	8.11865
Q8CFN2	Cell division control protein 42 homolog OS=Rattus norvegicus GN=Cdc42 PE=1 SV=2 - [CDC42_RAT]	19.4448	22.51	4	3	4	9	8.60762e+06	191	21.245	6.55127
P97576	GrpE protein homolog 1, mitochondrial OS=Rattus norvegicus GN=Grpel1 PE=1 SV=2 - [GRPE1_RAT]	19.442	18.89	1	4	4	8	3.1752e+06	217	24.2819	8.38232
P07323	Gamma-enolase OS=Rattus norvegicus GN=Eno2 PE=1 SV=2 - [ENOG_RAT]	19.3917	11.98	1	3	5	10	5.85928e+06	434	47.1109	5.16064
D3ZYI0	Grancalcin (Predicted) OS=Rattus norvegicus GN=Gca PE=4 SV=2 - [D3ZYI0_RAT]	19.232	18.18	1	4	4	8	7.00863e+06	220	24.5686	5.07178
B2RZ72	Actin related protein 2/3 complex, subunit 4 (Predicted), isoform CRA_a OS=Rattus norvegicus GN=Arpc4 PE=2 SV=1 - [B2RZ72_RAT]	19.0272	22.62	1	4	4	7	1.71307e+07	168	19.6543	8.42627
P10111	Peptidyl-prolyl cis-trans isomerase A OS=Rattus norvegicus GN=Ppia PE=1 SV=2 - [PPIA_RAT]	18.9774	35.98	3	4	4	13	7.91849e+06	164	17.8628	8.1626
D3ZXR2	Protein Wdr52 (Fragment) OS=Rattus norvegicus GN=LOC100364695 PE=4 SV=2 - [D3ZXR2_RAT]	18.8072	0.39	1	1	1	10	4.33259e+06	1815	209.39	5.43994
P25235	Dolichyl-diphosphooligosaccharide--protein glycosyltransferase subunit 2 OS=Rattus norvegicus GN=Rpn2 PE=2 SV=2 - [RPN2_RAT]	18.6177	7.61	1	4	4	7	3.29775e+06	631	69.035	5.97314
Q07936	Annexin A2 OS=Rattus norvegicus GN=Anxa2 PE=1 SV=2 - [ANXA2_RAT]	18.6177	13.86	2	4	4	7	1.55384e+06	339	38.6538	7.69385
P60203	Myelin proteolipid protein OS=Rattus norvegicus GN=Plp1 PE=1 SV=2 - [MYPR_RAT]	18.4913	11.55	5	3	3	8	1.89288e+07	277	30.0571	8.35303
P15865	Histone H1.4 OS=Rattus norvegicus GN=Hist1h1e PE=1 SV=3 - [H14_RAT]	18.4256	14.61	2	1	3	8	1.09687e+07	219	21.974	11.1069
P62747	Rho-related GTP-binding protein RhoB OS=Rattus norvegicus GN=Rhob PE=1 SV=1 - [RHOB_RAT]	18.416	23.47	1	2	4	6	2.86807e+06	196	22.1091	5.23682
P41562	Isocitrate dehydrogenase [NADP] cytoplasmic OS=Rattus norvegicus GN=Idh1 PE=1 SV=1 - [IDHC_RAT]	18.3047	11.11	2	4	5	9	3.34889e+06	414	46.7045	6.99072
Q9JLJ3	4-trimethylaminobutyraldehyde dehydrogenase OS=Rattus norvegicus GN=Aldh9a1 PE=1 SV=1 - [AL9A1_RAT]	18.2781	11.74	1	5	5	8	5.83322e+06	494	53.618	6.91748
P60123	RuvB-like 1 OS=Rattus norvegicus GN=Ruvbl1 PE=1 SV=1 - [RUVB1_RAT]	18.2517	16.67	1	6	6	8	2.52152e+06	456	50.1823	6.41748
F1M2K7	Enolase (Fragment) OS=Rattus norvegicus PE=3 SV=1 - [F1M2K7_RAT]	18.1581	11.17	1	1	6	16	8.1982e+06	358	38.7558	5.46533
Q920J4	Thioredoxin-like protein 1 OS=Rattus norvegicus GN=Txnl1 PE=1 SV=3 - [TXNL1_RAT]	18.027	25.26	1	5	5	8	2.29118e+06	289	32.2288	4.95752
E9PTD2	Uncharacterized protein OS=Rattus norvegicus PE=2 SV=2 - [E9PTD2_RAT]	18.0074	4.86	6	1	3	7	1.28091e+06	597	64.6071	9.01221
Q63016	Large neutral amino acids transporter small subunit 1 OS=Rattus norvegicus GN=Slc7a5 PE=1 SV=2 - [LAT1_RAT]	18.0059	8.2	1	3	3	6	929666	512	55.8667	7.89893
P19627	Guanine nucleotide-binding protein G(z) subunit alpha OS=Rattus norvegicus GN=Gnaz PE=2 SV=3 - [GNAZ_RAT]	17.987	10.42	1	3	3	6	972429	355	40.8538	7.60596
P15178	Aspartate--tRNA ligase, cytoplasmic OS=Rattus norvegicus GN=Dars PE=2 SV=1 - [SYDC_RAT]	17.9703	10.18	1	5	5	8	1.80694e+06	501	57.0902	6.44287
Q4V8I9	Protein Ugp2 OS=Rattus norvegicus GN=Ugp2 PE=2 SV=1 - [Q4V8I9_RAT]	17.9085	9.65	2	5	5	8	2.33365e+06	508	56.9878	7.60596
Q9QVC8	Peptidyl-prolyl cis-trans isomerase FKBP4 OS=Rattus norvegicus GN=Fkbp4 PE=1 SV=3 - [FKBP4_RAT]	17.8728	9.83	1	3	3	7	1.10233e+06	458	51.4178	5.61768
P63086	Mitogen-activated protein kinase 1 OS=Rattus norvegicus GN=Mapk1 PE=1 SV=3 - [MK01_RAT]	17.7603	11.17	18	2	4	9	4.1128e+06	358	41.2492	6.97607
Q04462	Valine--tRNA ligase OS=Rattus norvegicus GN=Vars PE=2 SV=2 - [SYVC_RAT]	17.6503	4.03	2	4	4	7	626354	1264	140.28	7.60596
P20171	GTPase HRas OS=Rattus norvegicus GN=Hras1 PE=1 SV=2 - [RASH_RAT]	17.6113	20.11	2	1	3	6	4.36554e+06	189	21.2846	5.31299
Q6AXT5	Ras-related protein Rab-21 OS=Rattus norvegicus GN=Rab21 PE=2 SV=1 - [RAB21_RAT]	17.4438	20.18	1	4	4	7	2.87499e+06	223	24.1482	7.94287
Q5RKH2	Galactokinase 1 OS=Rattus norvegicus GN=Galk1 PE=2 SV=1 - [Q5RKH2_RAT]	17.4172	11.22	1	4	4	7	1.40969e+06	392	42.3495	5.35107
Q63362	NADH dehydrogenase [ubiquinone] 1 alpha subcomplex subunit 5 OS=Rattus norvegicus GN=Ndufa5 PE=1 SV=3 - [NDUA5_RAT]	17.3169	37.93	3	5	6	11	6.76959e+06	116	13.4033	7.43018
Q5XIH7	Prohibitin-2 OS=Rattus norvegicus GN=Phb2 PE=1 SV=1 - [PHB2_RAT]	17.3031	16.72	1	5	5	9	2.69363e+06	299	33.2919	9.83252
Q5XI32	F-actin-capping protein subunit beta OS=Rattus norvegicus GN=Capzb PE=1 SV=1 - [CAPZB_RAT]	17.2878	16.54	1	4	4	7	2.65675e+06	272	30.6094	5.99854
D3ZAP9	Protein Gpd1l OS=Rattus norvegicus GN=Gpd1l PE=3 SV=1 - [D3ZAP9_RAT]	17.2606	15.1	1	5	5	9	1.65436e+06	351	38.0419	7.00537
B2GUZ3	Mthfd1l protein OS=Rattus norvegicus GN=Mthfd1l PE=2 SV=1 - [B2GUZ3_RAT]	17.1828	6.65	1	5	5	7	592071	977	105.776	7.50342
Q6TXE9	LRRGT00050 OS=Rattus norvegicus GN=Eprs PE=2 SV=1 - [Q6TXE9_RAT]	17.1348	3.63	3	4	5	8	5.74247e+06	1486	166.676	7.50342
F1LSQ6	Proteasome subunit alpha type OS=Rattus norvegicus GN=Psma7 PE=2 SV=1 - [F1LSQ6_RAT]	17.0607	13.39	5	3	3	6	725899	254	28.3809	8.45557
P19527	Neurofilament light polypeptide OS=Rattus norvegicus GN=Nefl PE=1 SV=3 - [NFL_RAT]	17.0601	13.28	1	6	7	10	1.16587e+07	542	61.298	4.65283
Q6IRK9	Carboxypeptidase Q OS=Rattus norvegicus GN=Cpq PE=1 SV=1 - [CBPQ_RAT]	17.0565	11.23	1	4	4	6	2.66191e+06	472	52.0086	6.41748
Q5EB77	Ras-related protein Rab-18 OS=Rattus norvegicus GN=Rab18 PE=2 SV=1 - [RAB18_RAT]	17.0459	25.24	1	4	4	5	2.40667e+06	206	22.9616	5.23682
P63088	Serine/threonine-protein phosphatase PP1-gamma catalytic subunit OS=Rattus norvegicus GN=Ppp1cc PE=1 SV=1 - [PP1G_RAT]	17.03	6.5	4	3	3	9	1.70495e+06	323	36.9597	6.53662
P81155	Voltage-dependent anion-selective channel protein 2 OS=Rattus norvegicus GN=Vdac2 PE=1 SV=2 - [VDAC2_RAT]	16.943	16.95	1	3	4	6	2.3866e+06	295	31.7256	7.48877
P97532	3-mercaptopyruvate sulfurtransferase OS=Rattus norvegicus GN=Mpst PE=1 SV=3 - [THTM_RAT]	16.9073	18.86	1	4	4	6	642575	297	32.9194	6.31592
Q5FVQ4	Malectin OS=Rattus norvegicus GN=Mlec PE=2 SV=1 - [MLEC_RAT]	16.8625	15.46	1	4	4	6	1.92661e+06	291	32.3978	5.5542
Q6AZ26	C-terminal binding protein 1 OS=Rattus norvegicus GN=Ctbp1 PE=2 SV=1 - [Q6AZ26_RAT]	16.8545	15.09	2	4	5	8	4.93238e+06	391	42.6028	6.58057
Q9EPH8	Polyadenylate-binding protein 1 OS=Rattus norvegicus GN=Pabpc1 PE=2 SV=1 - [PABP1_RAT]	16.8439	12.42	8	7	7	9	2.50091e+06	636	70.6559	9.49561
D3ZJX5	Protein LOC687295 OS=Rattus norvegicus GN=LOC687295 PE=4 SV=2 - [D3ZJX5_RAT]	16.7334	15.58	1	4	4	9	2.92881e+06	353	39.8297	8.1333
P61265	Syntaxin-1B OS=Rattus norvegicus GN=Stx1b PE=1 SV=1 - [STX1B_RAT]	16.673	13.19	1	4	4	7	1.3467e+06	288	33.2238	5.37646
Q63396	Activated RNA polymerase II transcriptional coactivator p15 OS=Rattus norvegicus GN=Sub1 PE=2 SV=3 - [TCP4_RAT]	16.6437	22.83	1	2	2	6	2.29716e+06	127	14.4324	9.59814
G3V8L3	Lamin A, isoform CRA_b OS=Rattus norvegicus GN=Lmna PE=3 SV=1 - [G3V8L3_RAT]	16.6306	13.83	7	8	9	9	1.29428e+06	665	74.2667	6.97607
D3ZS58	NADH dehydrogenase [ubiquinone] 1 alpha subcomplex subunit 2 OS=Rattus norvegicus GN=Ndufa2 PE=3 SV=1 - [D3ZS58_RAT]	16.6081	47.42	1	5	5	12	7.81545e+06	97	10.8378	9.71533
G3V6M3	Synaptotagmin II OS=Rattus norvegicus GN=Syt2 PE=4 SV=1 - [G3V6M3_RAT]	16.5886	10.43	2	2	4	8	3.8059e+06	422	47.2072	7.98682
D4A6H8	Protein Ctnna2 (Fragment) OS=Rattus norvegicus GN=Ctnna2 PE=4 SV=2 - [D4A6H8_RAT]	16.5029	6.29	1	2	5	6	1.09828e+06	922	101.734	5.69385
Q4V8F9	Hydroxysteroid dehydrogenase-like protein 2 OS=Rattus norvegicus GN=Hsdl2 PE=2 SV=1 - [HSDL2_RAT]	16.5018	9.54	1	5	5	8	2.17199e+06	524	58.3069	6.18896
Q5XIM9	T-complex protein 1 subunit beta OS=Rattus norvegicus GN=Cct2 PE=1 SV=3 - [TCPB_RAT]	16.4427	9.35	1	5	5	11	4.76553e+06	535	57.4221	6.45557
P97834	COP9 signalosome complex subunit 1 OS=Rattus norvegicus GN=Gps1 PE=1 SV=1 - [CSN1_RAT]	16.4415	14.01	1	6	6	8	1.73318e+06	471	53.3941	6.84424
P24329	Thiosulfate sulfurtransferase OS=Rattus norvegicus GN=Tst PE=1 SV=3 - [THTR_RAT]	16.3546	18.52	1	4	4	6	3.1328e+06	297	33.3858	7.85498
B5DFN4	Prefoldin 5 (Predicted), isoform CRA_a OS=Rattus norvegicus GN=Pfdn5 PE=2 SV=1 - [B5DFN4_RAT]	16.1588	9.74	1	1	1	4	1.27719e+06	154	17.315	6.32861
P11608	ATP synthase protein 8 OS=Rattus norvegicus GN=Mt-atp8 PE=1 SV=1 - [ATP8_RAT]	16.1303	46.27	3	3	3	9	1.67339e+06	67	7.63698	9.31982
Q6P4Z9	COP9 signalosome complex subunit 8 OS=Rattus norvegicus GN=Cops8 PE=2 SV=1 - [CSN8_RAT]	16.1202	13.88	1	2	2	5	1.05073e+06	209	23.221	5.19873
P83732	60S ribosomal protein L24 OS=Rattus norvegicus GN=Rpl24 PE=1 SV=1 - [RL24_RAT]	16.0709	12.74	3	2	2	5	3.09125e+06	157	17.7679	11.2534
B5DFE0	Mpp6 protein OS=Rattus norvegicus GN=Mpp6 PE=2 SV=1 - [B5DFE0_RAT]	16.0497	10.56	1	5	5	8	1.04005e+06	540	60.8957	6.17627
Q5I0H9	Protein disulfide-isomerase A5 OS=Rattus norvegicus GN=Pdia5 PE=2 SV=1 - [PDIA5_RAT]	15.9632	8.51	2	4	4	6	676657	517	59.361	7.37158
Q3T1J1	Eukaryotic translation initiation factor 5A-1 OS=Rattus norvegicus GN=Eif5a PE=1 SV=3 - [IF5A1_RAT]	15.8649	17.53	3	3	3	7	1.70279e+06	154	16.8214	5.23682
Q62876	Synaptogyrin-1 OS=Rattus norvegicus GN=Syngr1 PE=2 SV=1 - [SNG1_RAT]	15.8069	10.26	1	2	2	6	1.27296e+07	234	25.6523	4.65283
F1M9A2	Sodium/calcium exchanger 2 OS=Rattus norvegicus GN=Slc8a2 PE=2 SV=2 - [F1M9A2_RAT]	15.8026	3.8	2	3	3	7	826898	920	100.334	5.14795
O35314	Secretogranin-1 OS=Rattus norvegicus GN=Chgb PE=1 SV=2 - [SCG1_RAT]	15.7326	5.63	1	3	3	6	1.41541e+06	675	77.489	5.03369
P04762	Catalase OS=Rattus norvegicus GN=Cat PE=1 SV=3 - [CATA_RAT]	15.5934	7.97	1	3	3	5	852417	527	59.7195	7.50342
P08081	Clathrin light chain A OS=Rattus norvegicus GN=Clta PE=1 SV=1 - [CLCA_RAT]	15.5674	13.31	3	4	4	11	4.70997e+06	248	26.964	4.50049
M0RAD1	Thiomorpholine-carboxylate dehydrogenase (Fragment) OS=Rattus norvegicus GN=Crym PE=4 SV=1 - [M0RAD1_RAT]	15.5582	9.58	2	3	3	6	1.56108e+06	313	33.5302	5.38916
P09527	Ras-related protein Rab-7a OS=Rattus norvegicus GN=Rab7a PE=1 SV=2 - [RAB7A_RAT]	15.4823	16.91	1	3	3	5	2.78236e+06	207	23.4889	6.69775
Q32PX6	Protein Rhog OS=Rattus norvegicus GN=Rhog PE=2 SV=1 - [Q32PX6_RAT]	15.4443	12.57	3	1	2	5	5.62302e+06	191	21.2949	8.11865
D4AE02	Uncharacterized protein OS=Rattus norvegicus GN=Fam98b PE=4 SV=2 - [D4AE02_RAT]	15.4117	9.74	1	3	3	6	1.11262e+06	431	46.2673	8.14795
Q63345	Myelin-oligodendrocyte glycoprotein OS=Rattus norvegicus GN=Mog PE=1 SV=1 - [MOG_RAT]	15.3613	17.96	2	4	4	6	1.02867e+06	245	27.8638	8.35303
D3ZAI6	Protein Nt5dc3 OS=Rattus norvegicus GN=Nt5dc3 PE=3 SV=2 - [D3ZAI6_RAT]	15.3545	11.54	1	6	6	7	4.20788e+06	546	63.086	8.6167
Q63569	26S protease regulatory subunit 6A OS=Rattus norvegicus GN=Psmc3 PE=2 SV=1 - [PRS6A_RAT]	15.35	9.57	2	3	3	6	327762	439	49.1294	5.23682
D3ZE63	Protein LOC679748 OS=Rattus norvegicus GN=LOC679748 PE=4 SV=1 - [D3ZE63_RAT]	15.2681	13.91	4	2	2	11	1.6504e+07	115	12.5973	7.89893
Q63377	Sodium/potassium-transporting ATPase subunit beta-3 OS=Rattus norvegicus GN=Atp1b3 PE=2 SV=1 - [AT1B3_RAT]	15.2575	12.9	1	3	3	6	1.89303e+06	279	31.8091	7.95752
B0BNJ4	Ethylmalonic encephalopathy 1 OS=Rattus norvegicus GN=Ethe1 PE=2 SV=1 - [B0BNJ4_RAT]	15.2506	17.32	1	4	4	7	1.78856e+06	254	27.659	7.06396
Q64119	Myosin light polypeptide 6 OS=Rattus norvegicus GN=Myl6 PE=1 SV=3 - [MYL6_RAT]	15.2239	19.87	6	3	3	7	4.50806e+06	151	16.9641	4.55127
P23514	Coatomer subunit beta OS=Rattus norvegicus GN=Copb1 PE=1 SV=1 - [COPB_RAT]	15.2136	6.61	1	6	6	8	2.86867e+06	953	106.943	5.96045
F1LQ05	Endophilin-A1 (Fragment) OS=Rattus norvegicus GN=Sh3gl2 PE=2 SV=1 - [F1LQ05_RAT]	15.1911	11.83	3	3	3	5	2.21701e+06	338	38.3472	5.13525
D4A9L5	Band 4.1-like protein 1 OS=Rattus norvegicus GN=Epb41l1 PE=4 SV=2 - [D4A9L5_RAT]	15.1784	2.96	5	2	2	5	432538	879	98.1521	5.74463
P14925-5	Isoform PAM-3B of Peptidyl-glycine alpha-amidating monooxygenase OS=Rattus norvegicus GN=Pam - [AMD_RAT]	15.1014	4.81	9	4	4	6	2.04322e+06	853	94.667	6.21436
P07633	Propionyl-CoA carboxylase beta chain, mitochondrial OS=Rattus norvegicus GN=Pccb PE=2 SV=1 - [PCCB_RAT]	15.0663	7.76	2	3	3	6	3.07706e+07	541	58.589	7.47412
G3V7Y3	ATP synthase subunit delta, mitochondrial OS=Rattus norvegicus GN=Atp5d PE=3 SV=1 - [G3V7Y3_RAT]	15.0566	13.69	2	2	2	5	5.08275e+06	168	17.5522	5.23682
Q5U2R7	LDLR chaperone MESD OS=Rattus norvegicus GN=Mesdc2 PE=2 SV=1 - [MESD_RAT]	15.0537	20.09	1	4	4	8	821278	224	25.1997	5.65576
Q08877-8	Isoform 13 of Dynamin-3 OS=Rattus norvegicus GN=Dnm3 - [DYN3_RAT]	15.0036	6.38	17	2	4	9	6.63472e+06	564	63.8868	8.76318
Q5PPJ7	Psmd1 protein (Fragment) OS=Rattus norvegicus GN=Psmd1 PE=2 SV=1 - [Q5PPJ7_RAT]	14.9393	5.2	5	3	3	5	1.53683e+06	846	93.2626	6.39209
Q68FP1-2	Isoform 2 of Gelsolin OS=Rattus norvegicus GN=Gsn - [GELS_RAT]	14.897	6.98	2	5	5	7	1.37159e+06	731	80.8784	5.69385
P09034	Argininosuccinate synthase OS=Rattus norvegicus GN=Ass1 PE=2 SV=1 - [ASSY_RAT]	14.8915	12.62	1	5	5	7	1.82588e+06	412	46.4669	7.78174
P46462	Transitional endoplasmic reticulum ATPase OS=Rattus norvegicus GN=Vcp PE=1 SV=3 - [TERA_RAT]	14.872	8.93	1	6	6	6	959419	806	89.2927	5.26221
B3VQJ0	Glutamate decarboxylase 1 variant GAD67NT OS=Rattus norvegicus GN=Gad1 PE=2 SV=1 - [B3VQJ0_RAT]	14.6545	7.21	2	2	3	6	577722	444	49.9802	7.06396
D3ZAF6	ATP synthase subunit f, mitochondrial OS=Rattus norvegicus GN=Atp5j2 PE=1 SV=1 - [ATPK_RAT]	14.6513	23.86	1	2	2	9	1.46633e+07	88	10.4456	10.0376
P35565	Calnexin OS=Rattus norvegicus GN=Canx PE=1 SV=1 - [CALX_RAT]	14.6221	7.11	1	3	3	6	1.34611e+06	591	67.2126	4.62744
P81795	Eukaryotic translation initiation factor 2 subunit 3 OS=Rattus norvegicus GN=Eif2s3 PE=1 SV=2 - [IF2G_RAT]	14.5775	8.9	2	3	3	6	2.30403e+06	472	51.0472	8.39697
D3ZUX5	Coiled-coil-helix-coiled-coil-helix domain containing 3 (Predicted), isoform CRA_a OS=Rattus norvegicus GN=Chchd3 PE=4 SV=1 - [D3ZUX5_RAT]	14.5693	15.42	1	3	3	5	1.48963e+06	227	26.4182	8.1333
Q641Z6	EH domain-containing protein 1 OS=Rattus norvegicus GN=Ehd1 PE=1 SV=1 - [EHD1_RAT]	14.5551	7.3	1	1	4	6	2.05591e+06	534	60.5646	6.82959
Q5RKI0	WD repeat-containing protein 1 OS=Rattus norvegicus GN=Wdr1 PE=1 SV=3 - [WDR1_RAT]	14.4449	7.43	1	4	4	7	961824	606	66.1399	6.62451
P00787	Cathepsin B OS=Rattus norvegicus GN=Ctsb PE=1 SV=2 - [CATB_RAT]	14.4446	12.98	2	4	4	7	1.02027e+06	339	37.4456	5.60498
Q499N5	Acyl-CoA synthetase family member 2, mitochondrial OS=Rattus norvegicus GN=Acsf2 PE=2 SV=1 - [ACSF2_RAT]	14.4323	8.29	1	5	5	7	1.88877e+06	615	67.8429	8.11865
P45953	Very long-chain specific acyl-CoA dehydrogenase, mitochondrial OS=Rattus norvegicus GN=Acadvl PE=1 SV=1 - [ACADV_RAT]	14.2695	7.33	2	4	4	5	1.90459e+06	655	70.7046	8.89502
Q5FVJ0	Protein RUFY3 OS=Rattus norvegicus GN=Rufy3 PE=1 SV=1 - [RUFY3_RAT]	14.2367	10.66	2	4	4	5	799805	469	52.8732	5.49072
O09178	AMP deaminase 3 OS=Rattus norvegicus GN=Ampd3 PE=2 SV=2 - [AMPD3_RAT]	14.1426	7.97	2	5	6	7	1.02359e+06	765	88.4264	7.02002
P62762	Visinin-like protein 1 OS=Rattus norvegicus GN=Vsnl1 PE=1 SV=2 - [VISL1_RAT]	14.0643	16.75	4	3	3	7	1.73235e+06	191	22.128	5.14795
P54921	Alpha-soluble NSF attachment protein OS=Rattus norvegicus GN=Napa PE=1 SV=2 - [SNAA_RAT]	14.0597	16.95	1	4	4	6	1.28159e+06	295	33.1712	5.45264
Q68FS2	COP9 signalosome complex subunit 4 OS=Rattus norvegicus GN=Cops4 PE=2 SV=1 - [CSN4_RAT]	14.0364	13.3	1	5	5	6	1.79995e+06	406	46.2607	5.84619
A9UMV9	Ndufa7 protein OS=Rattus norvegicus GN=Ndufa7 PE=4 SV=1 - [A9UMV9_RAT]	14.0247	39.29	1	4	4	6	6.92398e+06	112	12.4926	10.4771
Q6IFU9	Protein Krt16 OS=Rattus norvegicus GN=Krt16 PE=2 SV=1 - [Q6IFU9_RAT]	13.9165	4.32	5	1	2	7	8.04617e+06	463	50.7457	5.12256
P50430	Arylsulfatase B OS=Rattus norvegicus GN=Arsb PE=2 SV=2 - [ARSB_RAT]	13.8712	9.09	2	5	5	6	3.03772e+06	528	58.9215	6.59521
P39069	Adenylate kinase isoenzyme 1 OS=Rattus norvegicus GN=Ak1 PE=1 SV=3 - [KAD1_RAT]	13.8131	18.56	2	3	3	5	1.73531e+06	194	21.5702	7.89893
Q924M6	Apoptosis-inducing factor OS=Rattus norvegicus GN=Aifm1 PE=2 SV=1 - [Q924M6_RAT]	13.7874	8.06	2	4	4	5	702491	608	66.0785	8.89502
Q5XIT9	Methylcrotonoyl-CoA carboxylase beta chain, mitochondrial OS=Rattus norvegicus GN=Mccc2 PE=2 SV=1 - [MCCB_RAT]	13.7819	6.22	1	3	3	6	2.20145e+06	563	61.4784	8.30908
Q5XFW8	Protein SEC13 homolog OS=Rattus norvegicus GN=Sec13 PE=1 SV=1 - [SEC13_RAT]	13.7747	12.11	1	3	3	5	1.85512e+06	322	35.5251	5.37646
Q99NI1	Nucleoside diphosphate kinase DR-nm23 OS=Rattus norvegicus GN=Nme3 PE=2 SV=1 - [Q99NI1_RAT]	13.7723	21.3	2	3	3	5	2.38693e+06	169	19.0769	6.34131
Q6AYG5	Ethylmalonyl-CoA decarboxylase OS=Rattus norvegicus GN=Echdc1 PE=1 SV=1 - [ECHD1_RAT]	13.7721	13.38	1	3	3	4	1.76954e+06	299	32.61	7.03467
Q32PW9	Psmc6 protein (Fragment) OS=Rattus norvegicus GN=Psmc6 PE=2 SV=1 - [Q32PW9_RAT]	13.7663	12.34	2	4	4	5	780600	381	43.2607	7.48877
G3V8T5	Protein Ruvbl2 OS=Rattus norvegicus GN=Ruvbl2 PE=4 SV=1 - [G3V8T5_RAT]	13.7261	10.8	2	4	4	5	2.04781e+06	463	51.0805	5.64307
F1LQC1	Acyl-coenzyme A oxidase OS=Rattus norvegicus GN=Acox1 PE=3 SV=2 - [F1LQC1_RAT]	13.625	5.91	4	3	3	5	1.20113e+06	660	74.5322	8.47021
Q9WU34-3	Isoform 3 of Neuronal-specific septin-3 OS=Rattus norvegicus GN=Sept3 - [SEPT3_RAT]	13.5403	13.29	5	3	4	8	6.11259e+06	301	34.2727	7.73779
P23562-2	Isoform Kidney of Band 3 anion transport protein OS=Rattus norvegicus GN=Slc4a1 - [B3AT_RAT]	13.5284	4.83	5	4	4	6	1.09314e+06	848	94.0928	6.63916
P63326	40S ribosomal protein S10 OS=Rattus norvegicus GN=Rps10 PE=2 SV=1 - [RS10_RAT]	13.4778	33.33	10	5	5	14	2.57553e+06	165	18.9038	10.1548
Q5BJU0	Protein Rras2 OS=Rattus norvegicus GN=Rras2 PE=2 SV=1 - [Q5BJU0_RAT]	13.4341	11.27	2	2	2	5	2.24371e+06	204	23.3847	6.01123
Q5M7A7	CB1 cannabinoid receptor-interacting protein 1 OS=Rattus norvegicus GN=Cnrip1 PE=1 SV=1 - [CNRP1_RAT]	13.424	20.12	1	3	3	9	4.71041e+06	164	18.6466	7.85498
Q91ZN1	Coronin-1A OS=Rattus norvegicus GN=Coro1a PE=1 SV=3 - [COR1A_RAT]	13.3863	7.59	1	3	3	5	1.08762e+06	461	51.033	6.48096
Q9JJ22-2	Isoform 2 of Endoplasmic reticulum aminopeptidase 1 OS=Rattus norvegicus GN=Erap1 - [ERAP1_RAT]	13.3477	5.2	3	4	4	6	893211	884	100.665	6.37939
P04904	Glutathione S-transferase alpha-3 OS=Rattus norvegicus GN=Gsta3 PE=1 SV=3 - [GSTA3_RAT]	13.3344	22.62	14	5	6	9	2.6125e+07	221	25.3033	8.74854
F1LPQ3	Alpha-mannosidase 2C1 OS=Rattus norvegicus GN=Man2c1 PE=2 SV=1 - [F1LPQ3_RAT]	13.3255	6.45	3	6	6	7	1.03209e+06	1039	115.827	6.45557
B1H267	Sorting nexin-5 OS=Rattus norvegicus GN=Snx5 PE=1 SV=1 - [SNX5_RAT]	13.3025	11.88	3	4	4	6	1.54405e+06	404	46.7641	6.62451
Q5U2S7	Proteasome (Prosome, macropain) 26S subunit, non-ATPase, 3 OS=Rattus norvegicus GN=Psmd3 PE=2 SV=1 - [Q5U2S7_RAT]	13.2878	6.79	1	3	3	5	848510	530	60.6503	8.44092
P85968	6-phosphogluconate dehydrogenase, decarboxylating OS=Rattus norvegicus GN=Pgd PE=1 SV=1 - [6PGD_RAT]	13.1146	5.8	3	2	2	5	1.32431e+06	483	53.202	7.02002
P84817-3	Isoform 3 of Mitochondrial fission 1 protein OS=Rattus norvegicus GN=Fis1 - [FIS1_RAT]	13.1086	17.24	3	2	2	4	3.08508e+06	145	16.2405	9.24658
F1LMZ8	26S proteasome non-ATPase regulatory subunit 11 OS=Rattus norvegicus GN=Psmd11 PE=2 SV=2 - [PSD11_RAT]	13.0954	10.9	3	4	4	6	1.5507e+06	422	47.434	6.48096
Q9QX69	LanC-like protein 1 OS=Rattus norvegicus GN=Lancl1 PE=2 SV=2 - [LANC1_RAT]	12.9875	12.53	1	4	4	8	2.12781e+06	399	45.2105	7.6499
Q05683	Glutamate decarboxylase 2 OS=Rattus norvegicus GN=Gad2 PE=1 SV=1 - [DCE2_RAT]	12.9737	12.99	1	6	7	8	1.66514e+06	585	65.3596	6.90283
Q5U302	Catenin (Cadherin associated protein), alpha 1 OS=Rattus norvegicus GN=Ctnna1 PE=2 SV=1 - [Q5U302_RAT]	12.9075	6.61	1	2	5	5	978693	908	100.174	6.22705
Q8VBU2-2	Isoform 2 of Protein NDRG2 OS=Rattus norvegicus GN=Ndrg2 - [NDRG2_RAT]	12.899	8.12	2	2	2	4	1.95096e+06	357	39.2453	5.49072
Q6RJR6-2	Isoform 2 of Reticulon-3 OS=Rattus norvegicus GN=Rtn3 - [RTN3_RAT]	12.8333	8.02	3	1	2	6	4.45179e+06	237	25.4145	8.49951
Q6IFU7	Keratin, type I cytoskeletal 42 OS=Rattus norvegicus GN=Krt42 PE=2 SV=1 - [K1C42_RAT]	12.8135	5.53	14	1	3	5	1.57437e+07	452	50.1819	5.16064
D3ZD23	ATP-binding cassette, sub-family E (OABP), member 1 OS=Rattus norvegicus GN=Abce1 PE=3 SV=1 - [D3ZD23_RAT]	12.7875	6.51	1	3	4	6	988554	599	67.257	8.33838
D3ZWA8	Protein Appl1 (Fragment) OS=Rattus norvegicus GN=Appl1 PE=4 SV=2 - [D3ZWA8_RAT]	12.7846	3.48	1	2	2	5	1.55218e+06	690	77.4495	5.5542
B2GV06	Succinyl-CoA:3-ketoacid coenzyme A transferase 1, mitochondrial OS=Rattus norvegicus GN=Oxct1 PE=1 SV=1 - [SCOT1_RAT]	12.7625	6.15	1	3	3	6	760216	520	56.1681	8.47021
Q91Y81	Septin-2 OS=Rattus norvegicus GN=Sept2 PE=1 SV=1 - [SEPT2_RAT]	12.7047	9.14	1	2	2	3	1.95473e+06	361	41.5663	6.59521
B4F7C9	Protein Stt3a OS=Rattus norvegicus GN=Stt3a PE=2 SV=1 - [B4F7C9_RAT]	12.6919	6.1	1	4	4	7	3.00995e+06	705	80.5449	8.104
Q6AYN4-2	Isoform 2 of Phytanoyl-CoA hydroxylase-interacting protein-like OS=Rattus norvegicus GN=Phyhipl - [PHIPL_RAT]	12.68	10.61	2	3	3	5	701821	330	37.5216	7.29834
P11275	Calcium/calmodulin-dependent protein kinase type II subunit alpha OS=Rattus norvegicus GN=Camk2a PE=1 SV=1 - [KCC2A_RAT]	12.6718	10.25	16	3	4	5	4.40934e+06	478	54.0805	7.07861
E2RUH2	Protein LOC100360501 OS=Rattus norvegicus GN=LOC100360501 PE=2 SV=1 - [E2RUH2_RAT]	12.6106	7.46	2	3	3	5	1.13031e+06	456	49.8871	4.79248
Q6P799	Serine--tRNA ligase, cytoplasmic OS=Rattus norvegicus GN=Sars PE=1 SV=3 - [SYSC_RAT]	12.5965	2.73	1	1	1	3	1.64579e+06	512	58.5508	6.18896
P61621	Protein transport protein Sec61 subunit alpha isoform 1 OS=Rattus norvegicus GN=Sec61a1 PE=2 SV=2 - [S61A1_RAT]	12.5731	6.09	2	3	3	6	4.89431e+06	476	52.2305	8.06006
Q01986	Dual specificity mitogen-activated protein kinase kinase 1 OS=Rattus norvegicus GN=Map2k1 PE=1 SV=2 - [MP2K1_RAT]	12.5628	10.94	1	2	4	6	2.50606e+06	393	43.4374	6.62451
Q9EQS0	Transaldolase OS=Rattus norvegicus GN=Taldo1 PE=1 SV=2 - [TALDO_RAT]	12.5035	9.79	1	3	3	5	1.64687e+06	337	37.4365	7.03467
B2RYX1	LOC685322 protein OS=Rattus norvegicus GN=LOC685322 PE=4 SV=1 - [B2RYX1_RAT]	12.4393	37.5	1	2	2	4	3.44137e+06	64	7.45685	9.12939
Q792I0	Protein lin-7 homolog C OS=Rattus norvegicus GN=Lin7c PE=1 SV=1 - [LIN7C_RAT]	12.4348	13.71	7	3	3	7	2.15564e+06	197	21.8205	8.42627
G3V9Y9	Adaptor-related protein complex 3, sigma 1 subunit (Predicted), isoform CRA_a OS=Rattus norvegicus GN=Ap3s1 PE=4 SV=1 - [G3V9Y9_RAT]	12.294	9.55	2	1	1	3	913080	157	18.1231	5.08447
Q9WV25-2	Isoform 2 of Poly(U)-binding-splicing factor PUF60 OS=Rattus norvegicus GN=Puf60 - [PUF60_RAT]	12.2209	6.95	2	3	3	4	1.5759e+06	547	58.508	5.35107
G3V918	Phosphoribosylglycinamide formyltransferase, isoform CRA_a OS=Rattus norvegicus GN=Gart PE=3 SV=1 - [G3V918_RAT]	12.1542	3.96	3	3	3	4	711086	1010	107.512	6.60986
D3ZFQ8	Cytochrome c-1 (Predicted), isoform CRA_b OS=Rattus norvegicus GN=Cyc1 PE=4 SV=2 - [D3ZFQ8_RAT]	12.021	5.53	1	1	1	11	485222	217	23.006	10.272
F1M8L5	Propionyl-CoA carboxylase alpha chain, mitochondrial OS=Rattus norvegicus GN=Pcca PE=2 SV=2 - [F1M8L5_RAT]	11.9946	7.03	3	3	4	5	1.46645e+06	626	69.1864	7.21045
Q4KM41	Ewing sarcoma breakpoint region 1 OS=Rattus norvegicus GN=Ewsr1 PE=2 SV=1 - [Q4KM41_RAT]	11.9514	4.42	3	1	1	4	1.26106e+06	317	33.054	9.90576
G3V8Q1	Protein Cope OS=Rattus norvegicus GN=Cope PE=4 SV=2 - [G3V8Q1_RAT]	11.9096	22.42	2	2	2	3	996807	165	18.4963	4.90674
B5DFC3	Protein Sec23a OS=Rattus norvegicus GN=Sec23a PE=2 SV=1 - [B5DFC3_RAT]	11.8967	5.75	1	4	4	5	1.70012e+06	765	86.1064	7.07861
P11232	Thioredoxin OS=Rattus norvegicus GN=Txn PE=1 SV=2 - [THIO_RAT]	11.8924	31.43	1	3	3	5	3.09499e+06	105	11.6657	4.91943
D3ZIE9	Protein Aldh18a1 OS=Rattus norvegicus GN=Aldh18a1 PE=4 SV=1 - [D3ZIE9_RAT]	11.892	6.79	1	5	5	5	1.22591e+06	795	87.275	7.56201
P85834	Elongation factor Tu, mitochondrial OS=Rattus norvegicus GN=Tufm PE=1 SV=1 - [EFTU_RAT]	11.8578	7.74	1	3	3	5	2.67661e+06	452	49.491	7.56201
O88767	Protein DJ-1 OS=Rattus norvegicus GN=Park7 PE=1 SV=1 - [PARK7_RAT]	11.8522	16.4	3	3	3	6	5.58446e+06	189	19.9614	6.771
G3V9W6	Aldehyde dehydrogenase OS=Rattus norvegicus GN=Aldh3a2 PE=3 SV=1 - [G3V9W6_RAT]	11.8159	7.44	3	3	3	4	1.71784e+06	484	54.0734	7.66455
D3ZQL7	Protein Tppp OS=Rattus norvegicus GN=Tppp PE=4 SV=1 - [D3ZQL7_RAT]	11.7223	14.22	1	3	3	5	6.99001e+06	218	23.5321	9.40771
A1L108-2	Isoform 2 of Actin-related protein 2/3 complex subunit 5-like protein OS=Rattus norvegicus GN=Arpc5l - [ARP5L_RAT]	11.6794	24.75	3	2	2	4	3.5055e+06	101	11.2282	10.0669
G3V7G8	Glycine--tRNA ligase OS=Rattus norvegicus GN=Gars PE=3 SV=1 - [G3V7G8_RAT]	11.6222	7.55	2	5	5	6	1.33756e+06	728	81.7407	6.56592
D4A5L9	Protein LOC679794 OS=Rattus norvegicus GN=LOC690675 PE=3 SV=1 - [D4A5L9_RAT]	11.6054	20.95	3	2	2	4	5.06006e+06	105	11.628	9.5835
Q4KM69	COP9 (Constitutive photomorphogenic) homolog, subunit 5 (Arabidopsis thaliana) OS=Rattus norvegicus GN=Cops5 PE=2 SV=1 - [Q4KM69_RAT]	11.5431	11.08	1	3	3	5	2.03987e+06	334	37.5547	6.53662
P68101	Eukaryotic translation initiation factor 2 subunit 1 OS=Rattus norvegicus GN=Eif2s1 PE=1 SV=2 - [IF2A_RAT]	11.5397	12.7	1	4	4	5	2.20825e+06	315	36.0854	5.08447
D4A3K5	Histone H1.1 OS=Rattus norvegicus GN=Hist1h1a PE=3 SV=1 - [H11_RAT]	11.5337	13.08	1	1	2	5	2.07806e+06	214	21.991	10.9897
P23565	Alpha-internexin OS=Rattus norvegicus GN=Ina PE=1 SV=2 - [AINX_RAT]	11.5316	10.69	2	4	5	6	9.83214e+06	505	56.0816	5.22412
Q5M963	Cytidine monophosphate N-acetylneuraminic acid synthetase OS=Rattus norvegicus GN=Cmas PE=2 SV=1 - [Q5M963_RAT]	11.4924	8.56	2	3	3	6	754343	432	48.1098	8.22119
Q5XIT1	Microtubule-associated protein RP/EB family member 3 OS=Rattus norvegicus GN=Mapre3 PE=1 SV=1 - [MARE3_RAT]	11.4487	17.08	1	5	5	8	2.20756e+06	281	31.946	5.5415
Q63475	Receptor-type tyrosine-protein phosphatase N2 OS=Rattus norvegicus GN=Ptprn2 PE=2 SV=1 - [PTPR2_RAT]	11.4217	4.38	1	3	4	6	2.15954e+06	1004	111.794	5.73193
Q66HR2	Microtubule-associated protein RP/EB family member 1 OS=Rattus norvegicus GN=Mapre1 PE=1 SV=3 - [MARE1_RAT]	11.4065	12.69	1	2	3	6	1.26333e+06	268	29.9852	5.22412
P05370	Glucose-6-phosphate 1-dehydrogenase OS=Rattus norvegicus GN=G6pdx PE=1 SV=3 - [G6PD_RAT]	11.4034	9.51	1	4	4	5	601286	515	59.3378	6.37939
D3ZBM3	Ferrochelatase OS=Rattus norvegicus GN=Fech PE=3 SV=1 - [D3ZBM3_RAT]	11.3999	9	1	3	3	5	869020	422	47.5213	8.71924
B2RYX0	Naca protein OS=Rattus norvegicus GN=Naca PE=2 SV=1 - [B2RYX0_RAT]	11.3278	13.49	2	2	2	3	1.72874e+06	215	23.3697	4.56396
P67874	Casein kinase II subunit beta OS=Rattus norvegicus GN=Csnk2b PE=1 SV=1 - [CSK2B_RAT]	11.31	5.12	1	1	1	4	1.58681e+06	215	24.926	5.5542
B2RYW9	Fumarylacetoacetate hydrolase domain-containing protein 2 OS=Rattus norvegicus GN=Fahd2 PE=1 SV=1 - [FAHD2_RAT]	11.2099	8.31	1	2	2	3	2.95035e+06	313	34.5591	8.35303
D3ZRM9	60S ribosomal protein L13 OS=Rattus norvegicus GN=LOC100360491 PE=3 SV=1 - [D3ZRM9_RAT]	11.182	9.95	5	2	2	4	701249	211	24.1874	11.4146
B1H2A2	Fsd1 protein OS=Rattus norvegicus GN=Fsd1 PE=2 SV=1 - [B1H2A2_RAT]	11.1154	8.06	2	4	4	5	764761	496	55.592	7.28369
Q4FZT0	Stomatin-like protein 2, mitochondrial OS=Rattus norvegicus GN=Stoml2 PE=1 SV=1 - [STML2_RAT]	11.0686	8.5	1	2	2	3	691631	353	38.3902	8.63135
P17475	Alpha-1-antiproteinase OS=Rattus norvegicus GN=Serpina1 PE=1 SV=2 - [A1AT_RAT]	11.0321	5.6	2	1	2	4	783630	411	46.1065	6.07471
P11167	Solute carrier family 2, facilitated glucose transporter member 1 OS=Rattus norvegicus GN=Slc2a1 PE=1 SV=1 - [GTR1_RAT]	11.0233	2.85	1	2	2	7	1.29695e+06	492	53.9274	8.71924
P32089	Tricarboxylate transport protein, mitochondrial OS=Rattus norvegicus GN=Slc25a1 PE=1 SV=1 - [TXTP_RAT]	10.9652	10.93	1	3	3	5	1.09339e+06	311	33.8138	9.86182
Q9ES21	Phosphatidylinositide phosphatase SAC1 OS=Rattus norvegicus GN=Sacm1l PE=1 SV=1 - [SAC1_RAT]	10.9439	4.77	1	3	3	5	1.18183e+06	587	66.996	7.28369
G3V647	Pyridoxal kinase OS=Rattus norvegicus GN=Pdxk PE=4 SV=1 - [G3V647_RAT]	10.9284	11.86	3	3	3	4	1.37074e+06	312	34.8326	6.80029
M0R9I8	Protein LOC100364427 OS=Rattus norvegicus GN=LOC100364427 PE=4 SV=1 - [M0R9I8_RAT]	10.8991	39.39	7	5	5	7	4.97629e+06	132	14.4914	6.7417
E9PSV5	Protein Psat1 OS=Rattus norvegicus GN=Psat1 PE=2 SV=2 - [E9PSV5_RAT]	10.8656	8.92	3	3	3	4	989324	370	40.4649	7.97217
Q923W4	Hepatoma-derived growth factor-related protein 3 OS=Rattus norvegicus GN=Hdgfrp3 PE=2 SV=1 - [HDGR3_RAT]	10.8569	7.92	1	1	1	3	622815	202	22.4329	8.39697
D3ZUB0	Protein Rcn1 OS=Rattus norvegicus GN=Rcn1 PE=4 SV=1 - [D3ZUB0_RAT]	10.8402	8.31	2	2	2	3	1.2486e+06	325	38.0666	4.81787
D4AB84	3-ketoacyl-CoA thiolase B, peroxisomal OS=Rattus norvegicus GN=Acaa1b PE=2 SV=2 - [D4AB84_RAT]	10.8398	9.92	5	2	2	4	419679	373	38.1095	7.89893
B2RYG2	Pck2 protein (Fragment) OS=Rattus norvegicus GN=Pck2 PE=2 SV=1 - [B2RYG2_RAT]	10.823	6.18	2	4	4	6	1.1176e+06	663	73.2249	8.00146
P24268	Cathepsin D OS=Rattus norvegicus GN=Ctsd PE=1 SV=1 - [CATD_RAT]	10.8028	9.09	2	3	3	5	2.84341e+06	407	44.6519	7.09326
D3ZUD8	Protein Tm9sf3 OS=Rattus norvegicus GN=Tm9sf3 PE=2 SV=1 - [D3ZUD8_RAT]	10.8021	3.75	1	2	2	5	1.55204e+06	587	67.4999	7.21045
F1M2F6	Pyruvate kinase (Fragment) OS=Rattus norvegicus PE=3 SV=2 - [F1M2F6_RAT]	10.7496	4.75	1	1	3	8	8.12012e+06	505	55.0645	7.40088
F7FKI5	Protein LOC685778 OS=Rattus norvegicus GN=Pdha1 PE=4 SV=1 - [F7FKI5_RAT]	10.7493	12.82	4	5	5	7	7.13366e+06	390	43.2227	8.19189
P70470	Acyl-protein thioesterase 1 OS=Rattus norvegicus GN=Lypla1 PE=1 SV=1 - [LYPA1_RAT]	10.7189	9.13	1	2	2	4	1.49293e+06	230	24.6923	6.50732
D3ZPP2	Protein Arl8a OS=Rattus norvegicus GN=Arl8a PE=3 SV=1 - [D3ZPP2_RAT]	10.7147	18.82	1	2	3	6	4.82789e+06	186	21.376	7.76709
F1LPG3	Phosphofurin acidic cluster sorting protein 1 OS=Rattus norvegicus GN=Pacs1 PE=2 SV=1 - [F1LPG3_RAT]	10.6901	7.49	3	5	5	6	880937	961	104.686	7.54736
B2RZ78	Vacuolar protein sorting-associated protein 29 OS=Rattus norvegicus GN=Vps29 PE=1 SV=2 - [VPS29_RAT]	10.6458	7.14	2	1	1	3	4.88418e+06	182	20.4556	6.78564
Q921A2	Proton myo-inositol cotransporter OS=Rattus norvegicus GN=Slc2a13 PE=2 SV=2 - [MYCT_RAT]	10.6274	4.08	1	2	2	3	781553	637	69.105	6.56592
P20717	Protein-arginine deiminase type-2 OS=Rattus norvegicus GN=Padi2 PE=1 SV=1 - [PADI2_RAT]	10.5216	7.37	2	4	4	5	563460	665	75.3081	5.47803
Q6LBQ2	Calpain II (Fragment) OS=Rattus norvegicus GN=Capn2 PE=2 SV=1 - [Q6LBQ2_RAT]	10.493	42.86	2	2	2	3	656808	56	6.75822	4.91943
Q5XI77	Annexin OS=Rattus norvegicus GN=Anxa11 PE=2 SV=1 - [Q5XI77_RAT]	10.4734	4.97	1	2	2	4	588883	503	54.1258	7.6499
B1H239	Leucine rich repeat containing 49 (Predicted) OS=Rattus norvegicus GN=Lrrc49 PE=2 SV=1 - [B1H239_RAT]	10.4518	2.92	1	1	1	4		686	78.888	8.08936
Q7M0F1	Glutathione transferase 3 (Fragments) OS=Rattus norvegicus PE=1 SV=1 - [Q7M0F1_RAT]	10.4486	30.43	3	1	4	6	6.54962e+06	115	13.7327	5.26221
P85969	Beta-soluble NSF attachment protein OS=Rattus norvegicus GN=Napb PE=1 SV=1 - [SNAB_RAT]	10.4462	8.75	2	2	2	3	2.05542e+06	297	33.4485	5.46533
Q9EPR9	Phosphodiesterase 1A OS=Rattus norvegicus GN=Pde1a PE=2 SV=1 - [Q9EPR9_RAT]	10.426	6.46	5	3	3	5	718638	542	61.8241	5.75732
P40329	Arginine--tRNA ligase, cytoplasmic OS=Rattus norvegicus GN=Rars PE=1 SV=2 - [SYRC_RAT]	10.4029	7.12	1	4	4	5	514265	660	75.762	7.04932
Q4KM74	Vesicle-trafficking protein SEC22b OS=Rattus norvegicus GN=Sec22b PE=1 SV=3 - [SC22B_RAT]	10.3568	20	1	3	3	3	1.69306e+06	215	24.7248	8.51416
D4ABI7	Protein LOC100365676 OS=Rattus norvegicus GN=LOC100365676 PE=4 SV=2 - [D4ABI7_RAT]	10.314	3.87	1	1	1	3	2.60842e+06	362	43.0764	9.0415
P53987	Monocarboxylate transporter 1 OS=Rattus norvegicus GN=Slc16a1 PE=1 SV=1 - [MOT1_RAT]	10.2693	5.87	1	2	2	3	2.67506e+06	494	53.2034	8.32373
D4A7V1	Uncharacterized protein OS=Rattus norvegicus PE=4 SV=2 - [D4A7V1_RAT]	10.1981	5.2	2	2	2	6	1.52385e+06	404	44.7769	5.68115
D3ZSA9	Protein Nomo1 OS=Rattus norvegicus GN=Nomo1 PE=4 SV=1 - [D3ZSA9_RAT]	10.179	3.05	1	3	3	4	1.08799e+06	1214	133.359	6.07471
P0CG51	Polyubiquitin-B OS=Rattus norvegicus GN=Ubb PE=1 SV=1 - [UBB_RAT]	10.1704	40.66	11	3	3	5	5.8246e+06	305	34.3475	7.53271
P15651	Short-chain specific acyl-CoA dehydrogenase, mitochondrial OS=Rattus norvegicus GN=Acads PE=1 SV=2 - [ACADS_RAT]	10.1635	9.22	2	3	3	4	650771	412	44.737	8.27979
Q64560	Tripeptidyl-peptidase 2 OS=Rattus norvegicus GN=Tpp2 PE=2 SV=3 - [TPP2_RAT]	10.0932	2.88	2	3	3	4	639222	1249	138.206	6.37939
P29419	ATP synthase subunit e, mitochondrial OS=Rattus norvegicus GN=Atp5i PE=1 SV=3 - [ATP5I_RAT]	10.0886	35.21	1	2	2	4	4.58214e+06	71	8.24948	9.34912
F1M7Y3	Protein Rap1gds1 OS=Rattus norvegicus GN=Rap1gds1 PE=2 SV=2 - [F1M7Y3_RAT]	10.0116	8.16	1	3	3	4	971910	478	52.2156	5.79541
P41498	Low molecular weight phosphotyrosine protein phosphatase OS=Rattus norvegicus GN=Acp1 PE=1 SV=3 - [PPAC_RAT]	10.0074	17.09	3	2	2	3	2.88644e+06	158	18.1398	6.52197
B0BN18	Prefoldin subunit 2 OS=Rattus norvegicus GN=Pfdn2 PE=2 SV=1 - [PFD2_RAT]	9.97358	24.03	1	3	3	4	1.52628e+06	154	16.5696	6.58057
F1M8L1	Kinesin-like protein KIF2A OS=Rattus norvegicus GN=Kif2a PE=2 SV=2 - [F1M8L1_RAT]	9.96716	6.82	4	5	5	6	3.07273e+06	704	79.6396	6.68311
Q5U300	Ubiquitin-like modifier-activating enzyme 1 OS=Rattus norvegicus GN=Uba1 PE=1 SV=1 - [UBA1_RAT]	9.93857	3.69	3	3	3	3	462704	1058	117.713	5.56689
Q6Q7Y5	Galpha13 OS=Rattus norvegicus GN=Gna13 PE=2 SV=1 - [Q6Q7Y5_RAT]	9.93154	5.04	7	1	2	4	2.48379e+07	377	43.9838	8.20654
P55161	Nck-associated protein 1 OS=Rattus norvegicus GN=Nckap1 PE=2 SV=1 - [NCKP1_RAT]	9.9156	5.67	3	6	6	7	1.5832e+06	1128	128.781	6.60986
D3ZZK1	Protein LOC100359563 OS=Rattus norvegicus GN=LOC100359563 PE=4 SV=1 - [D3ZZK1_RAT]	9.88859	19.33	7	2	2	7	9.77607e+06	119	13.3453	9.80322
Q63633-2	Isoform 2 of Solute carrier family 12 member 5 OS=Rattus norvegicus GN=Slc12a5 - [S12A5_RAT]	9.8585	3.76	6	4	4	5	1.11512e+06	1116	123.483	6.30322
P32198	Carnitine O-palmitoyltransferase 1, liver isoform OS=Rattus norvegicus GN=Cpt1a PE=1 SV=2 - [CPT1A_RAT]	9.85708	5.3	1	3	3	5	742832	773	88.0687	8.54346
F1LPM4	Amine oxidase [flavin-containing] B OS=Rattus norvegicus GN=Maob PE=2 SV=1 - [F1LPM4_RAT]	9.85592	7.34	2	3	3	6	813288	504	56.9046	8.25049
Q5U1W8	High-mobility group nucleosome binding domain 1 OS=Rattus norvegicus GN=Hmgn1 PE=4 SV=1 - [Q5U1W8_RAT]	9.8419	40.63	2	2	2	3	807271	96	10.1183	9.75928
Q19LA7	Vesicle-associated membrane protein 2 (Fragment) OS=Rattus norvegicus GN=Vamp2 PE=2 SV=1 - [Q19LA7_RAT]	9.81982	48.57	4	1	1	3	5.48532e+06	35	4.03711	9.31982
Q9EQP5	Prolargin OS=Rattus norvegicus GN=Prelp PE=2 SV=1 - [PRELP_RAT]	9.78243	9.81	1	4	4	4	2.70847e+06	377	43.1519	9.45166
Q99P74	Ras-related protein Rab-27B OS=Rattus norvegicus GN=Rab27b PE=2 SV=3 - [RB27B_RAT]	9.7648	6.42	1	1	1	3	565445	218	24.6043	5.5415
B0BNM1	NAD(P)H-hydrate epimerase OS=Rattus norvegicus GN=Apoa1bp PE=2 SV=1 - [NNRE_RAT]	9.76099	10.64	1	2	2	3	661868	282	30.8707	6.88818
Q08013	Translocon-associated protein subunit gamma OS=Rattus norvegicus GN=Ssr3 PE=1 SV=2 - [SSRG_RAT]	9.74544	11.89	2	2	2	3	1.43569e+06	185	21.0512	9.61279
P29457	Serpin H1 OS=Rattus norvegicus GN=Serpinh1 PE=1 SV=1 - [SERPH_RAT]	9.74367	2.88	2	1	1	3	2.55313e+06	417	46.4882	8.82178
Q6TUG0	DnaJ homolog subfamily B member 11 OS=Rattus norvegicus GN=Dnajb11 PE=2 SV=1 - [DJB11_RAT]	9.71186	6.7	1	2	2	4	853385	358	40.4697	6.31592
Q3B8Q2	Eukaryotic initiation factor 4A-III OS=Rattus norvegicus GN=Eif4a3 PE=1 SV=1 - [IF4A3_RAT]	9.67612	6.81	1	3	3	4	1.79169e+06	411	46.8112	6.72705
Q6PEC4	S-phase kinase-associated protein 1 OS=Rattus norvegicus GN=Skp1 PE=2 SV=3 - [SKP1_RAT]	9.65503	7.36	1	1	1	3	3.49314e+06	163	18.6603	4.53857
F1LPP3	Protein kinase C and casein kinase substrate in neurons protein 1 OS=Rattus norvegicus GN=Pacsin1 PE=2 SV=2 - [F1LPP3_RAT]	9.62877	6.8	2	3	3	4	2.11946e+06	441	50.3015	5.22412
P85970	Actin-related protein 2/3 complex subunit 2 OS=Rattus norvegicus GN=Arpc2 PE=1 SV=1 - [ARPC2_RAT]	9.59915	12	1	4	4	6	4.37246e+06	300	34.3695	7.35693
D3ZW08	Adenylosuccinate lyase (Predicted) OS=Rattus norvegicus GN=Adsl PE=4 SV=1 - [D3ZW08_RAT]	9.57333	4.55	1	2	2	4	2.00869e+06	484	54.8169	7.10791
F1LP30	Methylcrotonoyl-CoA carboxylase subunit alpha, mitochondrial OS=Rattus norvegicus GN=Mccc1 PE=2 SV=1 - [F1LP30_RAT]	9.57126	5.45	2	3	3	4	449640	715	79.2454	7.13721
Q9WU82	Catenin beta-1 OS=Rattus norvegicus GN=Ctnnb1 PE=1 SV=1 - [CTNB1_RAT]	9.56198	3.97	1	3	3	4	1.18094e+06	781	85.4002	5.85889
Q505J6	Mitochondrial glutamate carrier 2 OS=Rattus norvegicus GN=Slc25a18 PE=2 SV=2 - [GHC2_RAT]	9.55828	11.88	1	2	4	6	7.53385e+06	320	34.1478	9.17334
P42676	Neurolysin, mitochondrial OS=Rattus norvegicus GN=Nln PE=1 SV=1 - [NEUL_RAT]	9.55103	4.69	1	3	3	4	1.46796e+06	704	80.2025	6.46826
F1LR87	Beta-hexosaminidase subunit beta OS=Rattus norvegicus GN=Hexb PE=2 SV=2 - [F1LR87_RAT]	9.53094	5.03	2	2	2	3	1.39804e+06	537	61.135	8.47021
D4A4D5	Protein LOC100362751 OS=Rattus norvegicus GN=LOC498555 PE=4 SV=1 - [D4A4D5_RAT]	9.52979	21.74	3	2	2	3	1.90801e+06	115	11.6989	4.53857
M0R5K2	Uncharacterized protein OS=Rattus norvegicus PE=4 SV=1 - [M0R5K2_RAT]	9.52603	2.85	4	2	2	4	7.56056e+06	1296	145.185	5.51611
Q52KJ9	Protein Tmx1 OS=Rattus norvegicus GN=Tmx1 PE=2 SV=1 - [Q52KJ9_RAT]	9.52132	11.51	1	3	3	5	1.61214e+06	278	31.4147	5.30029
Q68FQ9	LanC lantibiotic synthetase component C-like 2 (Bacterial) OS=Rattus norvegicus GN=Lancl2 PE=2 SV=1 - [Q68FQ9_RAT]	9.51906	7.78	1	3	3	4	1.20437e+06	450	50.9356	7.45947
O89049	Thioredoxin reductase 1, cytoplasmic OS=Rattus norvegicus GN=Txnrd1 PE=1 SV=5 - [TRXR1_RAT]	9.50485	2.2	1	1	1	3	939904	499	54.6367	6.46826
Q2PQA9	Kinesin-1 heavy chain OS=Rattus norvegicus GN=Kif5b PE=1 SV=1 - [KINH_RAT]	9.50408	4.05	3	1	3	4	718010	963	109.463	6.44287
Q569C9	Golgi phosphoprotein 3 OS=Rattus norvegicus GN=Golph3 PE=2 SV=1 - [Q569C9_RAT]	9.46146	9.4	2	2	2	3	380663	298	33.7315	6.44287
Q5U2N2	Ubiquitin carboxyl-terminal hydrolase OS=Rattus norvegicus GN=Usp14 PE=2 SV=1 - [Q5U2N2_RAT]	9.44725	7.71	1	3	3	3	984713	493	55.9409	5.19873
B5DFF7	Dusp3 protein OS=Rattus norvegicus GN=Dusp3 PE=2 SV=1 - [B5DFF7_RAT]	9.41926	9.19	2	1	1	2	1.23427e+06	185	20.4552	6.53662
P11915-2	Isoform SCP2 of Non-specific lipid-transfer protein OS=Rattus norvegicus GN=Scp2 - [NLTP_RAT]	9.38745	19.58	3	3	3	4	2.64538e+06	143	15.2879	8.57275
F1M6F6	Protein Asap2 (Fragment) OS=Rattus norvegicus GN=Asap2 PE=4 SV=2 - [F1M6F6_RAT]	9.38172	1.52	4	2	2	5	5.72819e+07	922	102.694	6.68311
P12711	Alcohol dehydrogenase class-3 OS=Rattus norvegicus GN=Adh5 PE=1 SV=2 - [ADHX_RAT]	9.32732	10.96	2	3	3	5	1.37592e+06	374	39.5502	7.48877
Q566D6	Psip1 protein OS=Rattus norvegicus GN=Psip1 PE=2 SV=1 - [Q566D6_RAT]	9.30891	10.88	4	3	3	5	700163	331	37.343	9.17334
D3ZJF8	Protein Fcgbp OS=Rattus norvegicus GN=Fcgbp PE=2 SV=2 - [D3ZJF8_RAT]	9.28444	0.35	1	1	1	7	5.80893e+07	2582	274.806	5.09717
D3ZE32	Protein LOC361414 OS=Rattus norvegicus GN=LOC361414 PE=4 SV=2 - [D3ZE32_RAT]	9.24357	8.65	2	4	4	7	2.68452e+06	416	45.651	5.0083
Q5BK63	NADH dehydrogenase [ubiquinone] 1 alpha subcomplex subunit 9, mitochondrial OS=Rattus norvegicus GN=Ndufa9 PE=1 SV=2 - [NDUA9_RAT]	9.24104	5.04	1	2	2	6	1.37282e+06	377	42.5323	9.81787
P29147	D-beta-hydroxybutyrate dehydrogenase, mitochondrial OS=Rattus norvegicus GN=Bdh1 PE=1 SV=2 - [BDH_RAT]	9.20324	9.91	1	3	3	6	2.22877e+06	343	38.1773	8.83643
A0JPM9	Eukaryotic translation initiation factor 3 subunit J OS=Rattus norvegicus GN=Eif3j PE=2 SV=1 - [EIF3J_RAT]	9.19271	8.88	2	2	2	4	800270	259	29.1695	4.80518
P24473	Glutathione S-transferase kappa 1 OS=Rattus norvegicus GN=Gstk1 PE=1 SV=3 - [GSTK1_RAT]	9.19128	7.08	1	1	1	2	865360	226	25.4763	9.0708
Q08163	Adenylyl cyclase-associated protein 1 OS=Rattus norvegicus GN=Cap1 PE=1 SV=3 - [CAP1_RAT]	9.08911	6.12	1	2	3	5	2.19152e+06	474	51.5565	7.51807
P16617	Phosphoglycerate kinase 1 OS=Rattus norvegicus GN=Pgk1 PE=1 SV=2 - [PGK1_RAT]	9.04156	11.75	2	4	4	4	2.91343e+06	417	44.51	7.89893
P13852	Major prion protein OS=Rattus norvegicus GN=Prnp PE=1 SV=2 - [PRIO_RAT]	9.01687	7.87	1	2	2	4	2.65378e+06	254	27.7864	9.23193
B1WC34	Protein Prkcsh OS=Rattus norvegicus GN=Prkcsh PE=2 SV=1 - [B1WC34_RAT]	8.96744	2.29	1	1	1	3	544557	525	59.1811	4.4751
P13471	40S ribosomal protein S14 OS=Rattus norvegicus GN=Rps14 PE=2 SV=3 - [RS14_RAT]	8.9531	15.89	2	2	2	4	2.6277e+06	151	16.2485	10.0522
P36506	Dual specificity mitogen-activated protein kinase kinase 2 OS=Rattus norvegicus GN=Map2k2 PE=2 SV=1 - [MP2K2_RAT]	8.9489	8.75	1	1	3	4	1.062e+06	400	44.254	7.09326
M0R425	Uncharacterized protein (Fragment) OS=Rattus norvegicus PE=4 SV=1 - [M0R425_RAT]	8.94668	5.94	2	3	3	3	829237	657	73.1969	5.78271
F1LM84	Nidogen-1 OS=Rattus norvegicus GN=Nid1 PE=2 SV=1 - [F1LM84_RAT]	8.93814	1.69	1	2	2	4	519360	1246	136.952	5.46533
Q4AEF8	Coatomer subunit gamma-1 OS=Rattus norvegicus GN=Copg1 PE=2 SV=1 - [COPG1_RAT]	8.92889	5.26	1	3	3	4	558638	874	97.5515	5.38916
B2RYR3	Pycr1 protein (Fragment) OS=Rattus norvegicus GN=Pycr1 PE=2 SV=1 - [B2RYR3_RAT]	8.91314	10.53	3	3	3	4	3.58627e+06	285	29.6735	7.04932
Q5VLR5	BWK4 OS=Rattus norvegicus GN=Erp44 PE=2 SV=1 - [Q5VLR5_RAT]	8.90207	6.4	1	2	2	3	976695	406	46.8484	5.2749
P18420	Proteasome subunit alpha type-1 OS=Rattus norvegicus GN=Psma1 PE=1 SV=2 - [PSA1_RAT]	8.89479	13.31	1	3	3	5	1.07873e+06	263	29.4988	6.60986
Q5EB89	Bckdha protein (Fragment) OS=Rattus norvegicus GN=Bckdha PE=2 SV=1 - [Q5EB89_RAT]	8.83852	8.84	3	2	2	3	604197	328	37.3112	6.85889
M0RC45	Protein LOC683536 OS=Rattus norvegicus GN=LOC683536 PE=4 SV=1 - [M0RC45_RAT]	8.81448	7.28	3	1	1	3	2.04464e+06	151	16.9398	6.771
P06866	Haptoglobin OS=Rattus norvegicus GN=Hp PE=1 SV=3 - [HPT_RAT]	8.81428	6.34	2	2	2	3	1.39281e+06	347	38.5385	6.53662
P51583	Multifunctional protein ADE2 OS=Rattus norvegicus GN=Paics PE=2 SV=3 - [PUR6_RAT]	8.78784	9.65	2	4	4	5	2.30929e+06	425	47.0661	7.69385
Q5XIC1	Mannose-1-phosphate guanyltransferase alpha OS=Rattus norvegicus GN=Gmppa PE=2 SV=1 - [GMPPA_RAT]	8.78645	3.33	1	1	1	3	439206	420	46.1621	7.40088
D3ZGU2	Protein Acss3 OS=Rattus norvegicus GN=Acss3 PE=4 SV=1 - [D3ZGU2_RAT]	8.72857	4.62	1	2	2	4	1.10342e+06	498	54.2008	9.02686
F1M5X1	Protein Rrbp1 OS=Rattus norvegicus GN=Rrbp1 PE=2 SV=2 - [F1M5X1_RAT]	8.70499	3.12	5	3	3	3	559441	1443	156.412	9.0708
B2GUZ9	Fam49b protein OS=Rattus norvegicus GN=Fam49b PE=2 SV=1 - [B2GUZ9_RAT]	8.64331	12.04	1	3	3	3	588572	324	36.7527	6.06201
B0BNN0	Tsta3 protein OS=Rattus norvegicus GN=Tsta3 PE=2 SV=1 - [B0BNN0_RAT]	8.64086	5.76	2	1	1	2	451781	278	30.9145	6.60986
D0UFD0	Prostate leucine zipper variant 2 OS=Rattus norvegicus GN=Tpd52 PE=2 SV=1 - [D0UFD0_RAT]	8.64053	16.07	2	3	3	3	724584	224	24.224	4.71631
F1LPV0	Protein Nars OS=Rattus norvegicus GN=Nars PE=2 SV=2 - [F1LPV0_RAT]	8.62285	4.12	4	2	2	4	1.03782e+06	558	64.0869	5.85889
Q4QR73	DnaJ (Hsp40) homolog, subfamily A, member 4 OS=Rattus norvegicus GN=Dnaja4 PE=2 SV=1 - [Q4QR73_RAT]	8.62078	4.14	2	2	2	3	769680	555	61.8373	8.45557
Q62651	Delta(3,5)-Delta(2,4)-dienoyl-CoA isomerase, mitochondrial OS=Rattus norvegicus GN=Ech1 PE=1 SV=2 - [ECH1_RAT]	8.61505	6.73	1	2	2	3	3.5791e+06	327	36.1484	7.98682
P68182	cAMP-dependent protein kinase catalytic subunit beta OS=Rattus norvegicus GN=Prkacb PE=1 SV=2 - [KAPCB_RAT]	8.60572	11.11	6	4	4	6	2.2408e+06	351	40.682	8.55811
Q8CG45	Aflatoxin B1 aldehyde reductase member 2 OS=Rattus norvegicus GN=Akr7a2 PE=1 SV=2 - [ARK72_RAT]	8.58516	7.08	1	2	2	3	1.57794e+06	367	40.6493	8.104
Q9QZM5	Abl interactor 1 OS=Rattus norvegicus GN=Abi1 PE=2 SV=3 - [ABI1_RAT]	8.5247	7.35	4	3	3	3	1.68958e+06	476	51.6729	7.06396
F1MA54	[Pyruvate dehydrogenase [lipoamide]] kinase isozyme 1, mitochondrial OS=Rattus norvegicus GN=Pdk1 PE=2 SV=2 - [F1MA54_RAT]	8.50213	6.45	3	2	2	3	287046	434	49.0678	8.00146
B5DFG2	Hnrnpl protein (Fragment) OS=Rattus norvegicus GN=Hnrnpl PE=2 SV=1 - [B5DFG2_RAT]	8.49912	6.3	5	3	3	4	1.7121e+06	571	61.945	7.12256
Q9WUS0	Adenylate kinase isoenzyme 4, mitochondrial OS=Rattus norvegicus GN=Ak4 PE=2 SV=1 - [KAD4_RAT]	8.49504	9.42	1	2	2	4	1.89007e+06	223	25.1873	8.01611
C0JPT7	Filamin alpha OS=Rattus norvegicus GN=Flna PE=2 SV=1 - [C0JPT7_RAT]	8.48485	1.86	1	3	3	4	611740	2639	280.32	6.03662
D4A269	Uncharacterized protein OS=Rattus norvegicus PE=4 SV=1 - [D4A269_RAT]	8.45679	17.46	2	2	2	3	1.1891e+07	126	13.7672	7.59131
O70534	Delta-like 1 homolog (Drosophila) OS=Rattus norvegicus GN=Dlk1 PE=2 SV=1 - [O70534_RAT]	8.44414	5.48	2	2	2	3	1.17513e+06	383	41.1213	5.75732
D4A3C2	Protein RGD1304884 OS=Rattus norvegicus GN=RGD1304884 PE=4 SV=1 - [D4A3C2_RAT]	8.42908	3.19	1	1	1	3	732130	407	46.2462	5.021
F8WG91	ADP-ribosylation factor-like protein 3 (Fragment) OS=Rattus norvegicus GN=Arl3 PE=3 SV=1 - [F8WG91_RAT]	8.42868	28.73	2	4	4	4	3.83364e+06	181	20.3127	7.23975
Q9R1Z0	Voltage-dependent anion-selective channel protein 3 OS=Rattus norvegicus GN=Vdac3 PE=1 SV=2 - [VDAC3_RAT]	8.41672	12.01	2	2	3	3	2.20503e+06	283	30.7784	8.70459
B5DEP0	Dguok protein OS=Rattus norvegicus GN=Dguok PE=2 SV=1 - [B5DEP0_RAT]	8.39631	10	2	2	2	4	5.07019e+06	180	21.4557	5.98584
Q63965	Sideroflexin-1 OS=Rattus norvegicus GN=Sfxn1 PE=2 SV=4 - [SFXN1_RAT]	8.36662	9.63	2	2	3	4	2.24248e+06	322	35.5232	9.05615
B5DFN3	Mitochondrial nucleoid factor 1 OS=Rattus norvegicus GN=Mnf1 PE=2 SV=1 - [MNF1_RAT]	8.3582	14.71	2	2	2	4	3.13944e+06	136	16.3203	9.23193
Q66HA6	ADP-ribosylation factor-like protein 8B OS=Rattus norvegicus GN=Arl8b PE=2 SV=1 - [ARL8B_RAT]	8.34608	13.44	1	2	3	8	5.4855e+06	186	21.5251	8.42627
P21913	Succinate dehydrogenase [ubiquinone] iron-sulfur subunit, mitochondrial OS=Rattus norvegicus GN=Sdhb PE=2 SV=2 - [DHSB_RAT]	8.3389	11.7	1	4	4	6	2.99284e+06	282	31.8089	8.67529
G3V7G9	Eukaryotic translation initiation factor 3, subunit 6 interacting protein OS=Rattus norvegicus GN=Eif3s6ip PE=2 SV=2 - [G3V7G9_RAT]	8.33334	4.19	1	1	1	2	411029	382	45.053	9.02686
Q9WVK7	Hydroxyacyl-coenzyme A dehydrogenase, mitochondrial OS=Rattus norvegicus GN=Hadh PE=2 SV=1 - [HCDH_RAT]	8.29601	14.65	1	5	5	10	4.51211e+06	314	34.4259	8.76318
Q924N5	Long-chain-fatty-acid--CoA ligase ACSBG1 OS=Rattus norvegicus GN=Acsbg1 PE=1 SV=1 - [ACBG1_RAT]	8.28874	5.13	1	3	3	5	1.4304e+06	721	80.4675	5.92236
P62832	60S ribosomal protein L23 OS=Rattus norvegicus GN=Rpl23 PE=2 SV=1 - [RL23_RAT]	8.28304	25	1	2	2	3	336872	140	14.8561	10.5063
Q99N27	Sorting nexin-1 OS=Rattus norvegicus GN=Snx1 PE=1 SV=1 - [SNX1_RAT]	8.27551	8.05	1	3	4	4	1.7733e+06	522	59.0078	5.22412
Q32Q54	Protein Uqcc OS=Rattus norvegicus GN=Uqcc PE=2 SV=1 - [Q32Q54_RAT]	8.24043	5.69	1	2	2	5	1.55973e+06	299	34.5234	8.76318
F1LP57	Protein Map2k4 (Fragment) OS=Rattus norvegicus GN=Map2k4 PE=4 SV=2 - [F1LP57_RAT]	8.23996	8.59	2	3	3	4	583602	361	41.075	8.06006
B0BNB2	LOC687565 protein OS=Rattus norvegicus GN=LOC687565 PE=2 SV=1 - [B0BNB2_RAT]	8.22457	9.28	1	1	1	2	598118	194	21.735	5.2876
P21708	Mitogen-activated protein kinase 3 OS=Rattus norvegicus GN=Mapk3 PE=1 SV=5 - [MK03_RAT]	8.18151	10.79	19	1	3	4	2.00282e+06	380	43.0531	6.60986
F1LRV4	Heat shock 70 kDa protein 4 OS=Rattus norvegicus GN=Hspa4 PE=2 SV=1 - [F1LRV4_RAT]	8.17861	4.52	2	2	3	3	770058	840	93.9671	5.21143
F1LS29	Calpain-1 catalytic subunit OS=Rattus norvegicus GN=Capn1 PE=2 SV=1 - [F1LS29_RAT]	8.17652	3.23	2	2	2	3	1.01588e+06	713	82.0482	5.64307
F1LM33	Leucine-rich PPR motif-containing protein, mitochondrial OS=Rattus norvegicus GN=Lrpprc PE=2 SV=2 - [F1LM33_RAT]	8.17573	3.16	2	4	4	4	392325	1392	156.581	6.60986
G3V6V1	Aminopeptidase B OS=Rattus norvegicus GN=Rnpep PE=4 SV=1 - [G3V6V1_RAT]	8.17567	6.15	3	3	3	3	752324	650	72.6423	5.59229
Q3KRD8	Eukaryotic translation initiation factor 6 OS=Rattus norvegicus GN=Eif6 PE=2 SV=1 - [IF6_RAT]	8.17373	10.2	1	2	2	3	920126	245	26.5542	4.7417
A2RUW1	Toll-interacting protein OS=Rattus norvegicus GN=Tollip PE=2 SV=1 - [TOLIP_RAT]	8.16631	14.23	2	3	3	3	1.80723e+06	274	30.2949	5.17334
Q8R491	EH domain-containing protein 3 OS=Rattus norvegicus GN=Ehd3 PE=1 SV=2 - [EHD3_RAT]	8.14059	6.73	1	1	4	5	2.25397e+06	535	60.7527	6.45557
P47875	Cysteine and glycine-rich protein 1 OS=Rattus norvegicus GN=Csrp1 PE=2 SV=2 - [CSRP1_RAT]	8.13745	5.18	1	1	1	3	2.4376e+06	193	20.5998	8.57275
B1WBS4	Protein Vps26b OS=Rattus norvegicus GN=Vps26b PE=2 SV=1 - [B1WBS4_RAT]	8.105	11.9	1	3	3	4	1.12885e+06	336	39.1002	7.37158
P62198	26S protease regulatory subunit 8 OS=Rattus norvegicus GN=Psmc5 PE=1 SV=1 - [PRS8_RAT]	8.09893	6.16	1	2	2	3	1.21108e+06	406	45.5971	7.54736
Q71SY3	Translin OS=Rattus norvegicus GN=Tsn PE=2 SV=1 - [Q71SY3_RAT]	8.09329	10.09	4	2	2	3	2.94472e+06	228	26.1547	6.44287
O35824	DnaJ homolog subfamily A member 2 OS=Rattus norvegicus GN=Dnaja2 PE=2 SV=1 - [DNJA2_RAT]	8.08412	5.1	2	2	2	3	2.93579e+06	412	45.7366	6.48096
D3Z8J0	Protein RGD1564425 OS=Rattus norvegicus GN=RGD1564425 PE=4 SV=1 - [D3Z8J0_RAT]	8.05981	13.66	3	2	2	3	658353	205	23.0305	6.18896
D3ZKG1	Protein Mut OS=Rattus norvegicus GN=Mut PE=4 SV=1 - [D3ZKG1_RAT]	7.99696	4.55	1	3	3	3	786109	748	82.8727	7.03467
Q4FZS2	Budding uninhibited by benzimidazoles 3 homolog (S. cerevisiae) OS=Rattus norvegicus GN=Bub3 PE=2 SV=1 - [Q4FZS2_RAT]	7.99663	8.28	3	2	2	3	715116	326	36.9311	6.84424
P23978	Sodium- and chloride-dependent GABA transporter 1 OS=Rattus norvegicus GN=Slc6a1 PE=1 SV=1 - [SC6A1_RAT]	7.98531	5.18	1	2	2	4	815254	599	66.9571	7.95752
P54319	Phospholipase A-2-activating protein OS=Rattus norvegicus GN=Plaa PE=2 SV=3 - [PLAP_RAT]	7.98281	5.16	1	3	3	3	707362	795	87.0284	6.0874
D3ZNQ6	Protein Ube2m OS=Rattus norvegicus GN=Ube2m PE=3 SV=1 - [D3ZNQ6_RAT]	7.94839	10.38	1	2	2	3	1.50659e+06	183	20.8866	7.69385
F1LWH6	Methyl-CpG-binding protein 2 (Fragment) OS=Rattus norvegicus GN=Mecp2 PE=2 SV=1 - [F1LWH6_RAT]	7.85359	2.24	3	1	1	3	493285	491	52.9209	9.96436
P41542	General vesicular transport factor p115 OS=Rattus norvegicus GN=Uso1 PE=1 SV=1 - [USO1_RAT]	7.80918	2.4	1	2	2	3	274319	959	107.096	4.95752
P07154	Cathepsin L1 OS=Rattus norvegicus GN=Ctsl1 PE=1 SV=2 - [CATL1_RAT]	7.78992	4.79	1	1	1	2	2.20563e+06	334	37.636	6.82959
G3V8G2	Proteasome (Prosome, macropain) 26S subunit, non-ATPase, 5 (Predicted), isoform CRA_a OS=Rattus norvegicus GN=Psmd5 PE=4 SV=1 - [G3V8G2_RAT]	7.75716	7.54	2	3	3	3	1.13348e+06	504	55.8179	5.2749
M0R9U5	Protein LOC100911422 (Fragment) OS=Rattus norvegicus GN=LOC100911422 PE=4 SV=1 - [M0R9U5_RAT]	7.75599	8.81	2	3	3	4	1.13921e+06	329	37.7562	5.85889
Q6AYU3	DnaJ homolog subfamily B member 6 OS=Rattus norvegicus GN=Dnajb6 PE=1 SV=1 - [DNJB6_RAT]	7.74479	6.44	3	2	2	3	1366193	357	38.8984	9.36377
D3ZE15	Protein Ndufa13 OS=Rattus norvegicus GN=LOC100911483 PE=4 SV=1 - [D3ZE15_RAT]	7.73874	15.28	2	2	2	3	1.98668e+06	144	16.7657	9.48096
F1MAR6	Protein Prodh OS=Rattus norvegicus GN=Prodh PE=4 SV=2 - [F1MAR6_RAT]	7.73308	3.67	2	2	2	3	1.11285e+06	599	68.0513	7.26904
Q4KM65	Cleavage and polyadenylation specificity factor subunit 5 OS=Rattus norvegicus GN=Nudt21 PE=2 SV=1 - [CPSF5_RAT]	7.72595	10.57	1	2	2	3	934775	227	26.2237	8.82178
D4A465	Protein Lamtor2 OS=Rattus norvegicus GN=Lamtor2 PE=4 SV=1 - [D4A465_RAT]	7.72116	9.6	1	1	1	3	2.3664e+06	125	13.4718	5.40186
Q6AXX6	Redox-regulatory protein FAM213A OS=Rattus norvegicus GN=Fam213a PE=1 SV=1 - [F213A_RAT]	7.65534	9.17	1	2	2	3	1.13963e+06	229	25.7465	9.14404
M0RB03	Protein LOC100911677 OS=Rattus norvegicus GN=LOC100911677 PE=4 SV=1 - [M0RB03_RAT]	7.63885	2.82	4	1	1	2		568	58.1286	9.62744
Q63089-2	Isoform 2 of Solute carrier family 22 member 1 OS=Rattus norvegicus GN=Slc22a1 - [S22A1_RAT]	7.63298	3.72	2	1	1	5	1.58614e+06	430	47.646	8.99756
Q6P6Q7	Signal transducer and activator of transcription 1 OS=Rattus norvegicus GN=Stat1 PE=2 SV=1 - [Q6P6Q7_RAT]	7.60952	1.69	4	1	1	3	649663	712	83.0583	6.15088
Q62703	Reticulocalbin-2 OS=Rattus norvegicus GN=Rcn2 PE=1 SV=2 - [RCN2_RAT]	7.59859	7.19	1	2	2	3	800891	320	37.4099	4.41162
G3V9G3	Calcium/calmodulin-dependent protein kinase II, beta, isoform CRA_a OS=Rattus norvegicus GN=Camk2b PE=4 SV=1 - [G3V9G3_RAT]	7.57679	5.17	18	1	2	3	541319	542	60.4227	7.28369
Q5RK07	Igh-6 protein (Fragment) OS=Rattus norvegicus GN=Igh-6 PE=2 SV=1 - [Q5RK07_RAT]	7.49566	6.47	7	2	2	3	2.13922e+06	371	40.8516	7.21045
Q6AYL5	Splicing factor 3B subunit 4 OS=Rattus norvegicus GN=Sf3b4 PE=2 SV=1 - [SF3B4_RAT]	7.45613	3.3	1	1	1	2	482955	424	44.3271	8.55811
P13832	Myosin regulatory light chain RLC-A OS=Rattus norvegicus GN=Rlc-a PE=2 SV=2 - [MRLCA_RAT]	7.43226	18.6	5	3	3	3	3.03678e+06	172	19.8825	4.80518
G3V9U2	3-ketoacyl-CoA thiolase, mitochondrial OS=Rattus norvegicus GN=Acaa2 PE=4 SV=2 - [G3V9U2_RAT]	7.42731	7.83	2	3	3	5	1.81977e+06	396	41.7575	8.14795
D3ZRM5	Protein Rab23 OS=Rattus norvegicus GN=Rab23 PE=3 SV=1 - [D3ZRM5_RAT]	7.392	13.5	1	2	2	2	863214	237	26.6165	6.78564
D4A2G9	Protein Ranbp1 OS=Rattus norvegicus GN=RGD1565297 PE=4 SV=1 - [D4A2G9_RAT]	7.37617	14.29	1	3	3	4	1.68637e+06	203	23.5817	5.22412
D3ZDJ6	Uncharacterized protein OS=Rattus norvegicus PE=2 SV=2 - [D3ZDJ6_RAT]	7.37495	5.45	1	1	1	3	528653	220	23.6209	8.49951
F1LPB9	Rabphilin-3A OS=Rattus norvegicus GN=Rph3a PE=2 SV=1 - [F1LPB9_RAT]	7.36045	3.07	2	1	1	2	321042	684	75.7557	8.17725
P62250	40S ribosomal protein S16 OS=Rattus norvegicus GN=Rps16 PE=1 SV=2 - [RS16_RAT]	7.3466	14.38	7	2	2	4	1.7491e+06	146	16.435	10.2134
B5DFC9-2	Isoform 2 of Nidogen-2 OS=Rattus norvegicus GN=Nid2 - [NID2_RAT]	7.33156	4.55	2	1	1	5	5.72777e+07	176	20.1101	6.68311
F1LND7	Farnesyl pyrophosphate synthase OS=Rattus norvegicus GN=Fdps PE=2 SV=2 - [F1LND7_RAT]	7.31538	7.37	4	3	3	3	1.37367e+06	353	40.7869	5.64307
D3ZQM0	Protein Sf3a1 OS=Rattus norvegicus GN=Sf3a1 PE=4 SV=1 - [D3ZQM0_RAT]	7.30835	4.8	1	4	4	4	850519	791	88.5324	5.22412
B5DF55	Protein Stam OS=Rattus norvegicus GN=Stam PE=2 SV=1 - [B5DF55_RAT]	7.29926	5.48	1	2	2	3	612523	547	59.5544	4.85596
G3V7V9	Leucine carboxyl methyltransferase 1 OS=Rattus norvegicus GN=Lcmt1 PE=4 SV=1 - [G3V7V9_RAT]	7.28199	6.02	2	2	2	3	567174	332	38.3311	5.90967
Q6P9V7	Proteasome (Prosome, macropain) activator subunit 1 OS=Rattus norvegicus GN=Psme1 PE=2 SV=1 - [Q6P9V7_RAT]	7.27369	9.64	3	2	2	3	544464	249	28.617	5.80811
D4AEC0	Histone H2A OS=Rattus norvegicus GN=LOC685909 PE=3 SV=1 - [D4AEC0_RAT]	7.2558	12.5	18	1	2	6	1.82507e+07	128	13.5005	10.5796
Q5BJX6	Ccdc132 protein (Fragment) OS=Rattus norvegicus GN=Ccdc132 PE=2 SV=1 - [Q5BJX6_RAT]	7.23278	3.44	12	2	2	8	1.74262e+06	524	60.6551	6.37939
F1LM69	Dolichyl-diphosphooligosaccharide--protein glycosyltransferase 48 kDa subunit OS=Rattus norvegicus GN=Ddost PE=2 SV=2 - [F1LM69_RAT]	7.221	7.26	2	3	3	3	1.82754e+06	441	48.5548	5.40186
P50408	V-type proton ATPase subunit F OS=Rattus norvegicus GN=Atp6v1f PE=1 SV=1 - [VATF_RAT]	7.22034	19.33	2	2	2	3	1.02925e+06	119	13.362	5.8208
Q6LDS4	Superoxide dismutase [Cu-Zn] OS=Rattus norvegicus GN=Sod1 PE=2 SV=1 - [Q6LDS4_RAT]	7.22015	13.16	3	2	2	3	1.78935e+06	152	15.6997	6.354
D3ZI16	COP9 (Constitutive photomorphogenic) homolog, subunit 6 (Arabidopsis thaliana) (Predicted), isoform CRA_a OS=Rattus norvegicus GN=Cops6 PE=4 SV=1 - [D3ZI16_RAT]	7.1914	5.81	1	2	2	3	1.08429e+06	344	37.678	6.13818
P08082-2	Isoform Non-brain of Clathrin light chain B OS=Rattus norvegicus GN=Cltb - [CLCB_RAT]	7.18371	14.22	2	3	3	4	2.4345e+06	211	23.1062	4.67822
G3V6Q6	Guanine nucleotide binding protein, alpha 11 OS=Rattus norvegicus GN=Gna11 PE=4 SV=1 - [G3V6Q6_RAT]	7.1539	7.52	3	1	3	4	6.27597e+06	359	42.0175	6.29053
F7FLF2	Protein LOC100360057 (Fragment) OS=Rattus norvegicus GN=Rpl22 PE=4 SV=1 - [F7FLF2_RAT]	7.11633	18.9	3	2	2	3	5.59428e+06	127	14.6487	9.18799
D3ZSP1	Protein LOC100361838 OS=Rattus norvegicus GN=Snrpe PE=4 SV=1 - [D3ZSP1_RAT]	7.08774	25	4	2	2	3	1.73741e+06	92	10.7536	9.15869
P11962	Glycoprotein hormones alpha chain OS=Rattus norvegicus GN=Cga PE=2 SV=1 - [GLHA_RAT]	7.05515	12.5	2	1	1	2	1.53003e+06	120	13.4435	8.52881
F1M8W5	Disintegrin and metalloproteinase domain-containing protein 10 (Fragment) OS=Rattus norvegicus GN=Adam10 PE=4 SV=2 - [F1M8W5_RAT]	7.04703	3.38	2	2	2	3	885668	681	76.3167	7.6792
F1M9N9	Uncharacterized protein (Fragment) OS=Rattus norvegicus PE=2 SV=2 - [F1M9N9_RAT]	7.04504	1.15	19	3	4	4	617087	3903	427.159	5.26221
F1LN92	Protein Afg3l2 OS=Rattus norvegicus GN=Afg3l2 PE=2 SV=1 - [F1LN92_RAT]	7.03652	6.61	4	4	5	6	713813	802	89.2955	8.60205
P41565	Isocitrate dehydrogenase [NAD] subunit gamma 1, mitochondrial OS=Rattus norvegicus GN=Idh3g PE=2 SV=2 - [IDHG1_RAT]	7.02316	4.83	2	2	2	4	6.03202e+06	393	42.8242	8.89502
B0BN81	Ribosomal protein S5, isoform CRA_b OS=Rattus norvegicus GN=Rps5 PE=2 SV=1 - [B0BN81_RAT]	7.02298	10.78	2	2	2	4	1.78067e+06	204	22.8921	9.71533
Q68FX3	DEAD (Asp-Glu-Ala-Asp) box polypeptide 19a OS=Rattus norvegicus GN=Ddx19a PE=2 SV=1 - [Q68FX3_RAT]	6.98792	5.23	4	2	2	3	1.2006e+06	478	53.8698	6.7417
D4A8N1	Protein Dpm1 OS=Rattus norvegicus GN=Dpm1 PE=4 SV=1 - [D4A8N1_RAT]	6.96185	11.54	1	3	3	4	1.57128e+06	260	29.2315	9.49561
O35952-2	Isoform 2 of Hydroxyacylglutathione hydrolase, mitochondrial OS=Rattus norvegicus GN=Hagh - [GLO2_RAT]	6.95156	13.85	3	3	3	4	1.94192e+06	260	28.8778	6.94678
Q6AY30	Saccharopine dehydrogenase-like oxidoreductase OS=Rattus norvegicus GN=Sccpdh PE=2 SV=1 - [SCPDL_RAT]	6.93807	6.76	1	3	3	5	1.95876e+06	429	47.0581	8.83643
Q6JAM9	Transmembrane protein 35 OS=Rattus norvegicus GN=Tmem35 PE=1 SV=1 - [TMM35_RAT]	6.93456	8.98	1	1	1	2		167	18.4613	9.99365
P62890	60S ribosomal protein L30 OS=Rattus norvegicus GN=Rpl30 PE=3 SV=2 - [RL30_RAT]	6.88927	24.35	1	2	2	2	2.12293e+06	115	12.7757	9.62744
P36201	Cysteine-rich protein 2 OS=Rattus norvegicus GN=Crip2 PE=2 SV=1 - [CRIP2_RAT]	6.88731	10.58	1	1	1	2	842597	208	22.6811	8.63135
D3ZT90	Glutaryl-Coenzyme A dehydrogenase (Predicted) OS=Rattus norvegicus GN=Gcdh PE=3 SV=1 - [D3ZT90_RAT]	6.88396	9.62	1	3	4	5	5.84641e+06	447	49.6815	8.71924
A1L1L6	Mitochondrial Rho GTPase OS=Rattus norvegicus GN=Rnf135 PE=2 SV=1 - [A1L1L6_RAT]	6.87244	5.39	2	3	3	3	679685	631	72.1106	6.40479
Q99P39-2	Isoform Cytoplasmic of Cysteine desulfurase, mitochondrial OS=Rattus norvegicus GN=Nfs1 - [NFS1_RAT]	6.84556	11.34	4	4	4	4	1.49507e+06	397	44.0416	7.75244
C9WPN2	DEAD (Asp-Glu-Ala-Asp) box polypeptide 3 Y-linked OS=Rattus norvegicus GN=Ddx3y PE=2 SV=1 - [C9WPN2_RAT]	6.83015	5.67	3	3	3	3	582443	652	72.9609	7.10791
P62083	40S ribosomal protein S7 OS=Rattus norvegicus GN=Rps7 PE=1 SV=1 - [RS7_RAT]	6.8133	10.82	5	2	2	3	1.68929e+06	194	22.1133	10.0962
D3ZF97	Protein Erlec1 OS=Rattus norvegicus GN=Erlec1 PE=2 SV=2 - [D3ZF97_RAT]	6.8097	6.64	2	3	3	6	713280	482	54.6313	6.40479
Q923V8	15 kDa selenoprotein OS=Rattus norvegicus GN=Sep15 PE=1 SV=3 - [SEP15_RAT]	6.80775	7.41	1	1	1	2	429189	162	17.8121	5.35107
Q63259	Receptor-type tyrosine-protein phosphatase-like N OS=Rattus norvegicus GN=Ptprn PE=2 SV=2 - [PTPRN_RAT]	6.79614	3.87	1	2	3	6	2.73239e+06	983	106.161	7.03467
Q63514	C4b-binding protein alpha chain OS=Rattus norvegicus GN=C4bpa PE=2 SV=1 - [C4BPA_RAT]	6.79326	3.05	5	2	2	5	1.12261e+08	558	62.225	7.21045
Q5XIN6	LETM1 and EF-hand domain-containing protein 1, mitochondrial OS=Rattus norvegicus GN=Letm1 PE=1 SV=1 - [LETM1_RAT]	6.78115	3.38	1	2	2	2	536741	739	83.0079	6.59521
Q9Z2Q1-2	Isoform 2 of Protein transport protein Sec31A OS=Rattus norvegicus GN=Sec31a - [SC31A_RAT]	6.75267	3.66	3	4	4	4	1.2434e+06	1067	116.806	7.51807
F1M265	Protein LOC100360205 (Fragment) OS=Rattus norvegicus GN=LOC100360205 PE=2 SV=2 - [F1M265_RAT]	6.74618	1.23	2	1	1	3	2.71928e+07	729	79.0226	7.1665
F1MAA5	Protein Rangap1 OS=Rattus norvegicus GN=Rangap1 PE=4 SV=2 - [F1MAA5_RAT]	6.72827	8.36	2	4	4	4	575572	586	63.1033	4.71631
Q4V7C6	GMP synthase [glutamine-hydrolyzing] OS=Rattus norvegicus GN=Gmps PE=1 SV=1 - [GUAA_RAT]	6.69097	4.33	1	3	3	3	1.28042e+06	693	76.7088	6.63916
Q6PCT9	Proteasome (Prosome, macropain) 26S subunit, non-ATPase, 6 OS=Rattus norvegicus GN=Psmd6 PE=2 SV=1 - [Q6PCT9_RAT]	6.67827	7.2	1	3	3	3	1.06251e+06	389	45.5692	5.51611
Q641Y8	ATP-dependent RNA helicase DDX1 OS=Rattus norvegicus GN=Ddx1 PE=2 SV=1 - [DDX1_RAT]	6.59582	6.62	2	5	5	5	692334	740	82.4448	7.2251
Q6IRJ7	Annexin OS=Rattus norvegicus GN=Anxa7 PE=2 SV=1 - [Q6IRJ7_RAT]	6.58133	4.32	2	2	2	3	1.64994e+06	463	49.9873	6.17627
D3ZXK4	Protein Abhd11 OS=Rattus norvegicus GN=Abhd11 PE=4 SV=1 - [D3ZXK4_RAT]	6.55357	7.49	1	2	2	2	839601	307	33.1953	9.30518
D4A565	NADH dehydrogenase (Ubiquinone) 1 beta subcomplex, 5 (Predicted), isoform CRA_b OS=Rattus norvegicus GN=Ndufb5 PE=4 SV=1 - [D4A565_RAT]	6.54662	14.29	1	3	3	4	1.95281e+06	189	21.6505	9.46631
D3ZZC1	Protein Txndc5 OS=Rattus norvegicus GN=Txndc5 PE=3 SV=1 - [D3ZZC1_RAT]	6.54564	8.15	1	3	3	3	1.21719e+06	417	46.324	5.88428
F1LP60	Moesin (Fragment) OS=Rattus norvegicus GN=Msn PE=2 SV=1 - [F1LP60_RAT]	6.54341	4.69	6	3	3	3	1.64637e+06	576	67.6098	6.46826
D3ZTB5	Protein S100a13 OS=Rattus norvegicus GN=S100a13 PE=4 SV=2 - [D3ZTB5_RAT]	6.51598	20.41	1	2	2	4	613306	98	11.1909	6.12549
B4F772	Heat shock 70 kDa protein 4L OS=Rattus norvegicus GN=Hspa4l PE=2 SV=1 - [B4F772_RAT]	6.49001	3.22	1	1	2	2	809880	838	94.1614	5.69385
D3ZC90	Protein RGD1564809 (Fragment) OS=Rattus norvegicus GN=Fsd1l PE=4 SV=2 - [D3ZC90_RAT]	6.48053	3.28	2	1	1	2	921065	457	51.5158	6.93213
P24368	Peptidyl-prolyl cis-trans isomerase B OS=Rattus norvegicus GN=Ppib PE=2 SV=3 - [PPIB_RAT]	6.45372	9.72	1	2	2	3	1.47338e+06	216	23.7875	9.49561
P62963	Profilin-1 OS=Rattus norvegicus GN=Pfn1 PE=1 SV=2 - [PROF1_RAT]	6.44287	10	1	1	1	2	1.13827e+06	140	14.9475	8.27979
Q9WVS2	Probable tRNA threonylcarbamoyladenosine biosynthesis protein Osgep (Fragment) OS=Rattus norvegicus GN=Osgep PE=2 SV=1 - [OSGEP_RAT]	6.42282	5.28	2	1	1	2	746531	322	34.6274	6.22705
B6DTP5	DEAD (Asp-Glu-Ala-Asp) box polypeptide 5 (Fragment) OS=Rattus norvegicus GN=Ddx5 PE=2 SV=1 - [B6DTP5_RAT]	6.42264	5.7	3	3	3	3	1.5038e+06	614	69.0687	8.85107
F1M542	Protein Adam22 OS=Rattus norvegicus GN=Adam22 PE=4 SV=2 - [F1M542_RAT]	6.38985	1.25	10	1	1	3	226306	879	97.5998	7.86963
B2RZD1	Protein Sec61b OS=Rattus norvegicus GN=Sec61b PE=4 SV=1 - [B2RZD1_RAT]	6.38451	10.42	1	1	1	3	4.02824e+06	96	9.98211	11.561
Q99MZ8	LIM and SH3 domain protein 1 OS=Rattus norvegicus GN=Lasp1 PE=1 SV=1 - [LASP1_RAT]	6.37611	3.42	1	1	1	3	826463	263	29.9514	7.04932
M0R8Z9	Protein Pcdha2 OS=Rattus norvegicus GN=Pcdha2 PE=4 SV=1 - [M0R8Z9_RAT]	6.34482	1.38	2	1	1	13	6.27688e+06	796	85.892	4.85596
P51635	Alcohol dehydrogenase [NADP(+)] OS=Rattus norvegicus GN=Akr1a1 PE=1 SV=2 - [AK1A1_RAT]	6.3373	6.46	1	2	2	3	1.42619e+06	325	36.4829	7.31299
P63322	Ras-related protein Ral-A OS=Rattus norvegicus GN=Rala PE=1 SV=1 - [RALA_RAT]	6.33132	6.8	1	1	1	2	881301	206	23.538	7.10791
D3ZD11	Protein Spcs2 OS=Rattus norvegicus GN=Spcs2 PE=4 SV=1 - [D3ZD11_RAT]	6.3075	14.6	1	2	2	2	939503	226	24.9577	8.57275
P07943	Aldose reductase OS=Rattus norvegicus GN=Akr1b1 PE=1 SV=3 - [ALDR_RAT]	6.29613	7.91	2	2	2	3	2.99963e+06	316	35.7743	6.7124
D4A9H0	Protein Rab22a OS=Rattus norvegicus GN=Rab22a PE=4 SV=1 - [D4A9H0_RAT]	6.28651	7.49	2	1	1	2	400202	187	20.8286	7.73779
A3E0T0	Erythrocyte protein band 4.1-like 3 OS=Rattus norvegicus GN=Epb4.1l3 PE=2 SV=1 - [A3E0T0_RAT]	6.28214	1.49	4	1	1	2	416198	870	96.8922	5.2876
P18297	Sepiapterin reductase OS=Rattus norvegicus GN=Spr PE=1 SV=1 - [SPRE_RAT]	6.2642	10.69	1	2	2	2	732932	262	28.1105	5.70654
D3ZZQ8	Protein RGD1561381 OS=Rattus norvegicus GN=RGD1561381 PE=4 SV=1 - [D3ZZQ8_RAT]	6.26219	9.21	2	1	1	2	1.33641e+06	152	16.7525	9.33447
B5DEL8	NADH dehydrogenase (Ubiquinone) Fe-S protein 5 OS=Rattus norvegicus GN=Ndufs5 PE=4 SV=1 - [B5DEL8_RAT]	6.2542	17.92	2	2	2	3	1.70415e+06	106	12.6915	8.92432
O35796	Complement component 1 Q subcomponent-binding protein, mitochondrial OS=Rattus norvegicus GN=C1qbp PE=1 SV=2 - [C1QBP_RAT]	6.24984	11.83	1	2	2	2	557941	279	30.9775	4.86865
B5DEQ4	Protein Snrpb2 OS=Rattus norvegicus GN=Snrpb2 PE=2 SV=1 - [B5DEQ4_RAT]	6.17949	8	1	1	2	3	1.94551e+06	225	25.336	9.71533
D3ZSH6	Uncharacterized protein (Fragment) OS=Rattus norvegicus GN=LOC100360843 PE=4 SV=2 - [D3ZSH6_RAT]	6.15877	16.88	1	1	2	3	1.82743e+06	154	17.3072	10.1255
Q75T81	Asc-type amino acid transporter 1 OS=Rattus norvegicus GN=Slc7a10 PE=2 SV=1 - [Q75T81_RAT]	6.15514	4.15	1	1	1	2	539204	530	57.6342	8.54346
Q641X3	Beta-hexosaminidase subunit alpha OS=Rattus norvegicus GN=Hexa PE=2 SV=1 - [HEXA_RAT]	6.15497	4.17	1	2	2	3	1.00899e+06	528	60.4994	7.23975
Q6MG74	B-factor, properdin OS=Rattus norvegicus GN=Cfb PE=2 SV=1 - [Q6MG74_RAT]	6.15197	2.63	3	2	2	3	355868	761	85.0666	6.96143
D3ZVQ0	Ubiquitin carboxyl-terminal hydrolase OS=Rattus norvegicus GN=Usp5 PE=3 SV=1 - [D3ZVQ0_RAT]	6.14746	3.96	1	3	3	4	785283	858	95.7183	5.0083
B0BNG0	ER membrane protein complex subunit 2 OS=Rattus norvegicus GN=Emc2 PE=2 SV=1 - [EMC2_RAT]	6.14461	4.04	1	1	1	2	444092	297	34.8474	6.81494
O08700	Vacuolar protein sorting-associated protein 45 OS=Rattus norvegicus GN=Vps45 PE=2 SV=1 - [VPS45_RAT]	6.12871	6.32	1	4	4	5	1.07189e+06	570	64.8528	8.25049
D4A3V2	NADH dehydrogenase [ubiquinone] 1 alpha subcomplex subunit 6 OS=Rattus norvegicus GN=Ndufa6 PE=3 SV=1 - [D4A3V2_RAT]	6.12374	30.77	1	4	4	7	4.45017e+06	130	15.2141	10.1548
Q5RJR8	Leucine-rich repeat-containing protein 59 OS=Rattus norvegicus GN=Lrrc59 PE=1 SV=1 - [LRC59_RAT]	6.11212	11.4	1	3	3	4	2.81882e+06	307	34.8477	9.5249
Q78P65	Protein Rap2a OS=Rattus norvegicus GN=Rap2a PE=4 SV=1 - [Q78P65_RAT]	6.08483	20	3	2	2	3	5.15319e+06	105	11.9372	5.51611
G3V734	2,4-dienoyl CoA reductase 1, mitochondrial, isoform CRA_a OS=Rattus norvegicus GN=Decr1 PE=4 SV=1 - [G3V734_RAT]	6.07119	5.67	2	2	2	3	1.42732e+06	335	36.1097	8.93896
O35077	Glycerol-3-phosphate dehydrogenase [NAD(+)], cytoplasmic OS=Rattus norvegicus GN=Gpd1 PE=1 SV=4 - [GPDA_RAT]	6.06052	5.44	1	1	2	3	1.86412e+06	349	37.4282	6.59521
D4ABB2	Megalencephalic leukoencephalopathy with subcortical cysts 1 homolog (Human) (Predicted) OS=Rattus norvegicus GN=Mlc1 PE=4 SV=1 - [D4ABB2_RAT]	6.03941	3.2	1	1	1	3	1.92073e+06	406	44.2771	8.03076
F1M4B6	Uncharacterized protein OS=Rattus norvegicus GN=RGD1563349 PE=4 SV=2 - [F1M4B6_RAT]	6.03929	2.25	1	2	2	3	677147	1024	113.295	6.48096
F1LPY7	Trans-2-enoyl-CoA reductase, mitochondrial OS=Rattus norvegicus GN=Mecr PE=2 SV=1 - [F1LPY7_RAT]	6.02686	8.85	2	2	2	2	829440	373	40.3092	8.77783
P23640	Ras-related protein Rab-27A OS=Rattus norvegicus GN=Rab27a PE=1 SV=1 - [RB27A_RAT]	6.02426	4.98	1	1	1	2	4.85449e+06	221	25.0523	5.24951
Q5I0K5	Mycophenolic acid acyl-glucuronide esterase, mitochondrial OS=Rattus norvegicus GN=Abhd10 PE=1 SV=2 - [ABHDA_RAT]	6.01729	10.77	1	2	2	3	254422	297	33.1313	8.89502
Q05764-2	Isoform 2 of Beta-adducin OS=Rattus norvegicus GN=Add2 - [ADDB_RAT]	6.00859	2.49	3	1	1	2		562	62.7483	6.53662
Q4KLG5	Protein kinase, cAMP dependent regulatory, type II beta OS=Rattus norvegicus GN=Prkar2b PE=2 SV=1 - [Q4KLG5_RAT]	6.0025	5.48	2	1	1	2	698322	310	34.7094	5.05908
M0RCX0	Protein Pcbd2 (Fragment) OS=Rattus norvegicus GN=Pcbd2 PE=4 SV=1 - [M0RCX0_RAT]	5.99442	14.17	1	2	2	3	3.187e+06	127	14.1241	9.20264
Q6P9U8	Eukaryotic translation initiation factor 3 subunit H OS=Rattus norvegicus GN=Eif3h PE=2 SV=1 - [EIF3H_RAT]	5.96688	5.68	1	2	2	2	352053	352	39.88	6.66846
Q63639	Retinal dehydrogenase 2 OS=Rattus norvegicus GN=Aldh1a2 PE=1 SV=2 - [AL1A2_RAT]	5.94545	5.79	1	1	3	4	7.57292e+06	518	56.6038	5.74463
B5DEP2	Protein Rab25 OS=Rattus norvegicus GN=Rab25 PE=2 SV=1 - [B5DEP2_RAT]	5.93201	13.15	1	1	2	4	7785398	213	23.4299	5.96045
F1LWL0	Uncharacterized protein (Fragment) OS=Rattus norvegicus PE=4 SV=2 - [F1LWL0_RAT]	5.92043	6.87	6	2	2	2	2.10849e+06	335	34.941	9.0708
Q66HA9	Protein Sema4a OS=Rattus norvegicus GN=Sema4a PE=2 SV=1 - [Q66HA9_RAT]	5.90946	1.18	1	1	1	3	1.04295e+06	760	83.2335	7.59131
O35567	Bifunctional purine biosynthesis protein PURH OS=Rattus norvegicus GN=Atic PE=1 SV=2 - [PUR9_RAT]	5.90934	5.24	1	2	2	2	509525	592	64.1682	7.13721
Q5XIU9	Membrane-associated progesterone receptor component 2 OS=Rattus norvegicus GN=Pgrmc2 PE=1 SV=1 - [PGRC2_RAT]	5.88312	12.9	1	1	2	2	1.67861e+06	217	23.3887	5.26221
D4A510	Protein Smarcc2 OS=Rattus norvegicus GN=Smarcc2 PE=2 SV=2 - [D4A510_RAT]	5.87793	3.36	3	3	3	3	590120	1130	124.202	5.43994
D4A0T8	Uncharacterized protein OS=Rattus norvegicus GN=RGD1565002 PE=3 SV=2 - [D4A0T8_RAT]	5.87501	9.24	1	2	2	4	783145	303	34.298	8.77783
P50399	Rab GDP dissociation inhibitor beta OS=Rattus norvegicus GN=Gdi2 PE=1 SV=2 - [GDIB_RAT]	5.86224	7.64	2	2	3	3	793204	445	50.5047	6.25244
P97521	Mitochondrial carnitine/acylcarnitine carrier protein OS=Rattus norvegicus GN=Slc25a20 PE=1 SV=1 - [MCAT_RAT]	5.85974	9.3	2	3	3	4	1.59493e+06	301	33.1322	9.48096
Q66H61	Glutaminyl-tRNA synthetase OS=Rattus norvegicus GN=Qars PE=2 SV=1 - [Q66H61_RAT]	5.84108	3.23	2	2	2	2	665292	775	87.6448	7.31299
B5DES0	Protein Snrpd2 OS=Rattus norvegicus GN=Snrpd2 PE=4 SV=1 - [B5DES0_RAT]	5.83213	24.58	2	2	2	2	2.01426e+06	118	13.5182	9.90576
Q6AYK6	Calcyclin-binding protein OS=Rattus norvegicus GN=Cacybp PE=1 SV=1 - [CYBP_RAT]	5.82699	3.06	1	1	1	3	1.4941e+06	229	26.5247	7.86963
B1WC73	ADP-ribosylation factor-like 6 (Predicted), isoform CRA_a OS=Rattus norvegicus GN=Arl6 PE=2 SV=1 - [B1WC73_RAT]	5.81542	4.84	2	1	1	3	1.77615e+06	186	20.9551	8.25049
G3V7U4	Lamin-B1 OS=Rattus norvegicus GN=Lmnb1 PE=3 SV=1 - [G3V7U4_RAT]	5.77591	3.41	4	1	2	4	1.05561e+06	587	66.6457	5.16064
Q5U216	ATP-dependent RNA helicase DDX39A OS=Rattus norvegicus GN=Ddx39a PE=2 SV=1 - [DX39A_RAT]	5.74012	5.39	2	3	3	4	1.49408e+06	427	49.078	5.68115
D3ZZR5	Protein Snrpa1 OS=Rattus norvegicus GN=Snrpa1 PE=2 SV=1 - [D3ZZR5_RAT]	5.66029	8.24	2	2	2	4	760078	255	28.3001	8.83643
O08628	Procollagen C-endopeptidase enhancer 1 OS=Rattus norvegicus GN=Pcolce PE=2 SV=1 - [PCOC1_RAT]	5.65009	12.39	2	4	4	4	951784	468	50.153	8.06006
Q78P75	Dynein light chain 2, cytoplasmic OS=Rattus norvegicus GN=Dynll2 PE=1 SV=1 - [DYL2_RAT]	5.62433	20.22	2	2	2	4	6.72484e+06	89	10.3431	7.37158
G3V7W1	Programmed cell death 6 (Predicted), isoform CRA_a OS=Rattus norvegicus GN=Pdcd6 PE=4 SV=1 - [G3V7W1_RAT]	5.62245	9.95	2	2	2	5	424675	191	21.8908	5.64307
Q8CJC1	Gamma-aminobutyric acid receptor A2 subunit (Fragment) OS=Rattus norvegicus GN=Gabra2 PE=2 SV=1 - [Q8CJC1_RAT]	5.61687	12.9	7	1	1	3	1.17412e+06	62	7.1769	9.0415
D3ZZR9	Peptidyl-prolyl cis-trans isomerase OS=Rattus norvegicus GN=Fkbp2 PE=4 SV=1 - [D3ZZR9_RAT]	5.60788	8.57	1	1	1	3	5.09175e+06	140	15.3782	8.88037
P97849	Long-chain fatty acid transport protein 1 OS=Rattus norvegicus GN=Slc27a1 PE=2 SV=1 - [S27A1_RAT]	5.60628	1.86	2	1	1	2	810550	646	71.2377	8.45557
F7EPH4	Protein Ppa1 OS=Rattus norvegicus GN=Ppa1 PE=4 SV=1 - [F7EPH4_RAT]	5.59778	8.3	2	3	3	4	5.58334e+06	289	32.7501	5.46533
D4A997	HIV TAT specific factor 1 (Predicted) OS=Rattus norvegicus GN=Htatsf1 PE=2 SV=2 - [D4A997_RAT]	5.58868	2.45	1	2	2	2	1.07734e+06	776	88.5705	4.38623
M0RBG7	Protein LOC100909449 OS=Rattus norvegicus GN=LOC100909449 PE=4 SV=1 - [M0RBG7_RAT]	5.58464	2.26	4	1	1	3		310	35.307	8.99756
G3V9R8	Heterogeneous nuclear ribonucleoprotein C OS=Rattus norvegicus GN=LOC100911576 PE=2 SV=2 - [G3V9R8_RAT]	5.55574	10.74	2	3	3	3	901720	298	32.8371	4.99561
E9PSV7	Protein Nr6a1 OS=Rattus norvegicus GN=Nr6a1 PE=3 SV=2 - [E9PSV7_RAT]	5.55047	1.37	3	1	1	3	445528	437	50.2436	6.81494
Q812E9-2	Isoform 2 of Neuronal membrane glycoprotein M6-a OS=Rattus norvegicus GN=Gpm6a - [GPM6A_RAT]	5.55045	7.87	2	2	2	3	5.47833e+06	267	29.8708	5.8208
Q7TNA8	L-lactate dehydrogenase OS=Rattus norvegicus GN=Ldhal6b PE=2 SV=1 - [Q7TNA8_RAT]	5.53467	4.71	2	1	2	3	1.00312e+07	382	42.0222	9.40771
Q5XHY5	Threonine--tRNA ligase, cytoplasmic OS=Rattus norvegicus GN=Tars PE=2 SV=1 - [SYTC_RAT]	5.53332	3.74	1	2	2	2	753683	695	80.5245	6.94678
P19139	Casein kinase II subunit alpha OS=Rattus norvegicus GN=Csnk2a1 PE=1 SV=2 - [CSK21_RAT]	5.53125	7.93	1	2	3	3	7.39717e+06	391	45.0448	7.73779
Q6P688	S-adenosylmethionine synthase OS=Rattus norvegicus GN=Mat2a PE=2 SV=1 - [Q6P688_RAT]	5.43955	9.39	3	3	3	4	2.61307e+06	362	39.6992	5.90967
P27139	Carbonic anhydrase 2 OS=Rattus norvegicus GN=Ca2 PE=1 SV=2 - [CAH2_RAT]	5.41319	7.31	1	2	2	3	2.1468e+06	260	29.0956	7.40088
D3ZKX8	Protein Fam169a OS=Rattus norvegicus GN=Fam169a PE=4 SV=2 - [D3ZKX8_RAT]	5.40902	3.92	1	2	2	2	586138	663	73.0248	4.67822
B0BN51	Small nuclear ribonucleoprotein-associated protein OS=Rattus norvegicus GN=Snrpb PE=2 SV=1 - [B0BN51_RAT]	5.40555	6.49	5	2	2	4	1.33676e+06	231	23.6402	10.9019
P62859	40S ribosomal protein S28 OS=Rattus norvegicus GN=Rps28 PE=1 SV=1 - [RS28_RAT]	5.40476	17.39	1	1	1	2	2.18876e+06	69	7.8362	10.6968
B5DF91	ELAV (Embryonic lethal, abnormal vision, Drosophila)-like 1 (Hu antigen R) OS=Rattus norvegicus GN=Elavl1 PE=2 SV=1 - [B5DF91_RAT]	5.35759	3.99	2	1	1	2	1.00924e+06	326	36.1461	9.0415
B0K025	Oligosaccharyltransferase complex subunit OSTC OS=Rattus norvegicus GN=Ostc PE=2 SV=1 - [OSTC_RAT]	5.35705	13.42	2	2	2	2	1.04033e+06	149	16.8038	9.12939
O70280	WAP four-disulfide core domain protein 1 OS=Rattus norvegicus GN=Wfdc1 PE=1 SV=1 - [WFDC1_RAT]	5.35121	10.85	1	2	2	3	5.70102e+06	212	23.2154	7.26904
Q66HC5	Nuclear pore complex protein Nup93 OS=Rattus norvegicus GN=Nup93 PE=1 SV=1 - [NUP93_RAT]	5.32309	2.93	1	2	2	2	603278	819	93.2434	5.71924
M0R402	Protein LOC682967 OS=Rattus norvegicus GN=LOC682967 PE=4 SV=1 - [M0R402_RAT]	5.31294	3.5	1	1	2	3	2.6071e+06	457	51.6862	5.50342
D3ZF12	Signal peptidase complex subunit 3 OS=Rattus norvegicus GN=Spcs3 PE=4 SV=1 - [D3ZF12_RAT]	5.27627	12.78	1	2	2	2	786804	180	20.3146	8.6167
D3ZCS3	Protein Pcbp4 OS=Rattus norvegicus GN=Pcbp4 PE=4 SV=1 - [D3ZCS3_RAT]	5.27306	5.46	2	1	2	5	5.57639e+06	403	41.4267	8.1626
P14942	Glutathione S-transferase alpha-4 OS=Rattus norvegicus GN=Gsta4 PE=1 SV=2 - [GSTA4_RAT]	5.26519	7.66	4	1	2	6	1.18952e+07	222	25.4934	7.32764
P63036	DnaJ homolog subfamily A member 1 OS=Rattus norvegicus GN=Dnaja1 PE=2 SV=1 - [DNJA1_RAT]	5.26225	5.29	1	2	2	3	1.13631e+06	397	44.8395	7.07861
Q5M7T6	ATPase, H+ transporting, lysosomal 38kDa, V0 subunit d1 OS=Rattus norvegicus GN=Atp6v0d1 PE=2 SV=1 - [Q5M7T6_RAT]	5.2613	6.84	1	2	2	2	1.61649e+06	351	40.2752	4.99561
F1T2M4	Pituitary-specific positive transcription factor 1 variant w OS=Rattus norvegicus GN=Pit-1 PE=2 SV=1 - [F1T2M4_RAT]	5.25137	7.39	6	2	2	2	719563	284	32.5365	8.57275
D3ZJI7	Protein Serpinb11 OS=Rattus norvegicus GN=Serpinb11 PE=3 SV=1 - [D3ZJI7_RAT]	5.23458	4.9	1	1	1	2	9.07114e+06	388	43.6383	8.57275
B2RYI6	Snx4 protein OS=Rattus norvegicus GN=Snx4 PE=2 SV=1 - [B2RYI6_RAT]	5.21629	5.78	2	2	2	2	541694	450	51.9092	5.80811
P28073	Proteasome subunit beta type-6 OS=Rattus norvegicus GN=Psmb6 PE=1 SV=3 - [PSB6_RAT]	5.21521	8.82	1	2	2	2	486752	238	25.2734	4.99561
B0BNB9	HtrA serine peptidase 2 OS=Rattus norvegicus GN=Htra2 PE=2 SV=1 - [B0BNB9_RAT]	5.21206	5.46	1	2	2	3	476401	458	49.064	9.49561
D3ZLK9	ATP-dependent (S)-NAD(P)H-hydrate dehydratase OS=Rattus norvegicus GN=Carkd PE=3 SV=1 - [D3ZLK9_RAT]	5.20822	7.03	2	2	2	2	1.32415e+06	327	34.9401	7.94287
D3ZTW7	ATP synthase mitochondrial F1 complex assembly factor 2 (Predicted), isoform CRA_c OS=Rattus norvegicus GN=Atpaf2 PE=4 SV=1 - [D3ZTW7_RAT]	5.17431	3.02	1	1	1	2	511479	298	34.1706	6.55127
Q4V7D1	Signal sequence receptor, alpha OS=Rattus norvegicus GN=Ssr1 PE=2 SV=1 - [Q4V7D1_RAT]	5.15428	3.83	2	1	1	3	8.85586e+06	287	32.1872	4.43701
D3ZXH4	Uncharacterized protein OS=Rattus norvegicus PE=4 SV=1 - [D3ZXH4_RAT]	5.11017	17.95	1	1	1	2		117	12.9844	7.88428
B0BN63	LOC681996 protein OS=Rattus norvegicus GN=LOC681996 PE=2 SV=1 - [B0BN63_RAT]	5.0988	10.65	1	3	3	3	977442	338	38.0802	5.52881
P30713	Glutathione S-transferase theta-2 OS=Rattus norvegicus GN=Gstt2 PE=1 SV=3 - [GSTT2_RAT]	5.07802	8.61	2	2	2	3	1.75245e+06	244	27.4215	7.91357
P12839	Neurofilament medium polypeptide OS=Rattus norvegicus GN=Nefm PE=1 SV=4 - [NFM_RAT]	5.02384	6.26	3	4	5	5	9.69894e+06	846	95.7336	4.79248
Q8R3Z7	EH-domain containing 4 OS=Rattus norvegicus GN=Ehd4 PE=2 SV=1 - [Q8R3Z7_RAT]	5.01793	5.55	1	2	3	3	624191	541	61.4285	6.75635
F1LXV3	Protein Mst4 OS=Rattus norvegicus GN=Mst4 PE=2 SV=2 - [F1LXV3_RAT]	5.01292	3.13	2	1	1	2	371856	416	46.5446	5.23682
Q5RK27	Solute carrier family 12 member 7 OS=Rattus norvegicus GN=Slc12a7 PE=2 SV=2 - [S12A7_RAT]	5.01007	1.02	1	1	1	3	3.65634e+07	1083	119.301	6.58057
D3ZCH7	Adducin 3 (Gamma), isoform CRA_b OS=Rattus norvegicus GN=Add3 PE=2 SV=2 - [D3ZCH7_RAT]	5.00597	1.49	4	1	1	2	431801	673	75.3283	6.43018
M0RDK9	Protein Acad8 (Fragment) OS=Rattus norvegicus GN=Acad8 PE=4 SV=1 - [M0RDK9_RAT]	4.97338	7.72	1	2	2	2	666217	311	33.2806	8.39697
D3ZGJ7	Protein Spock2 OS=Rattus norvegicus GN=Spock2 PE=4 SV=2 - [D3ZGJ7_RAT]	4.96755	2.35	1	1	1	2	475398	425	46.9189	4.89404
Q9JJ54-4	Isoform 4 of Heterogeneous nuclear ribonucleoprotein D0 OS=Rattus norvegicus GN=Hnrnpd - [HNRPD_RAT]	4.96453	7.72	9	1	2	3	772369	285	30.451	8.41162
O35355	Guanine nucleotide-binding protein subunit gamma (Fragment) OS=Rattus norvegicus GN=Gng2 PE=2 SV=1 - [O35355_RAT]	4.94703	44.44	3	1	1	2	9.97936e+06	36	3.93802	7.18115
M0R4R4	Growth arrest-specific protein 7 (Fragment) OS=Rattus norvegicus GN=Gas7 PE=4 SV=1 - [M0R4R4_RAT]	4.94568	2.62	3	1	1	2	525329	420	48.0221	7.78174
F1LRV6	GMP reductase OS=Rattus norvegicus GN=Gmpr PE=2 SV=1 - [F1LRV6_RAT]	4.93801	3.48	2	1	1	2	862221	345	37.4338	6.97607
D3ZLA3	Copine 3 protein OS=Rattus norvegicus GN=Cpne3 PE=2 SV=1 - [D3ZLA3_RAT]	4.90814	3.38	14	2	2	2	1.67356e+06	533	59.648	5.68115
B2RYS6	Phosphoribosyl transferase domain containing 1 OS=Rattus norvegicus GN=Prtfdc1 PE=2 SV=1 - [B2RYS6_RAT]	4.85565	8.89	1	1	2	3	4.78467e+06	225	25.541	6.30322
P01835	Ig kappa chain C region, B allele OS=Rattus norvegicus PE=1 SV=1 - [KACB_RAT]	4.84703	25.47	4	2	2	2	1.55e+06	106	11.5935	5.16064
D3ZHG2	Kinesin light chain 1 OS=Rattus norvegicus GN=Klc1 PE=2 SV=2 - [D3ZHG2_RAT]	4.8467	5.54	4	3	3	3	592813	542	61.6282	5.8335
M0RBG3	Protein Trappc12 OS=Rattus norvegicus GN=Trappc12 PE=4 SV=1 - [M0RBG3_RAT]	4.84324	5.52	3	1	1	2	578927	181	20.3983	7.81104
D3ZHX3	Protein Diras2 OS=Rattus norvegicus GN=Diras2 PE=4 SV=1 - [D3ZHX3_RAT]	4.82972	12.06	1	2	2	2	1.15702e+06	199	22.4836	8.76318
P12785	Fatty acid synthase OS=Rattus norvegicus GN=Fasn PE=1 SV=3 - [FAS_RAT]	4.82803	1	1	2	2	2	5.45077e+06	2505	272.478	6.39209
Q6TEK4	Vitamin K epoxide reductase complex subunit 1 OS=Rattus norvegicus GN=Vkorc1 PE=1 SV=1 - [VKOR1_RAT]	4.81712	8.07	1	1	1	2	1.0928e+06	161	17.7714	9.33447
P62332	ADP-ribosylation factor 6 OS=Rattus norvegicus GN=Arf6 PE=1 SV=2 - [ARF6_RAT]	4.81384	13.14	4	1	3	8	1.79364e+07	175	20.0694	8.95361
Q9Z0J5-2	Isoform 2 of Thioredoxin reductase 2, mitochondrial OS=Rattus norvegicus GN=Txnrd2 - [TRXR2_RAT]	4.80232	2.44	3	1	1	2	459451	491	53.206	7.7085
G3V7H7	Synaptic vesicle glycoprotein 2B OS=Rattus norvegicus GN=Sv2b PE=4 SV=2 - [G3V7H7_RAT]	4.78562	4.54	2	3	3	3	1.32879e+06	683	77.2511	5.43994
D4A1Q9	Protein Ttll12 OS=Rattus norvegicus GN=Ttll12 PE=4 SV=1 - [D4A1Q9_RAT]	4.756	3.44	1	2	2	2	442273	639	73.8508	5.64307
E9PTX9	Protein Slc12a2 OS=Rattus norvegicus GN=Slc12a2 PE=4 SV=1 - [E9PTX9_RAT]	4.74158	0.83	2	1	1	2	543117	1203	130.284	6.52197
Q4V8I6	Ribosomal protein L11 OS=Rattus norvegicus GN=Rpl11 PE=2 SV=1 - [Q4V8I6_RAT]	4.71118	5.39	2	1	1	2	2.63104e+06	167	19.0121	9.80322
M0R531	Uncharacterized protein OS=Rattus norvegicus PE=4 SV=1 - [M0R531_RAT]	4.70002	8.24	2	1	1	2	955876	267	29.1849	7.04932
M0R7W5	Protein LOC100363449 OS=Rattus norvegicus GN=LOC100363449 PE=4 SV=1 - [M0R7W5_RAT]	4.68615	4.64	1	1	1	2	1.61732e+07	237	26.9597	6.52197
Q63198	Contactin-1 OS=Rattus norvegicus GN=Cntn1 PE=1 SV=2 - [CNTN1_RAT]	4.65413	1.08	1	1	1	2	525560	1021	113.423	6.11279
B2RYP4	Protein Snx2 OS=Rattus norvegicus GN=Snx2 PE=2 SV=1 - [B2RYP4_RAT]	4.63743	4.43	1	1	2	2	1.42022e+06	519	58.4947	5.12256
P97544	Lipid phosphate phosphohydrolase 3 OS=Rattus norvegicus GN=Ppap2b PE=1 SV=1 - [LPP3_RAT]	4.6333	7.37	2	2	2	2	641932	312	35.2952	9.14404
Q8R2H0	ATPase, H+ transporting, V1 subunit G isoform 2 OS=Rattus norvegicus GN=Atp6v1g2 PE=4 SV=1 - [Q8R2H0_RAT]	4.62971	16.95	2	2	2	2	476998	118	13.659	10.2573
D3ZU74	Cytoplasmic dynein 1 intermediate chain 2 OS=Rattus norvegicus GN=Dync1i2 PE=4 SV=1 - [D3ZU74_RAT]	4.62413	5.39	6	2	2	2	1.1082e+06	612	68.3207	5.2876
Q5U1Z2	Trafficking protein particle complex subunit 3 OS=Rattus norvegicus GN=Trappc3 PE=2 SV=1 - [TPPC3_RAT]	4.60848	10	1	2	2	2	2.65358e+06	180	20.2892	4.95752
F1LPG5	Protein LOC688963 OS=Rattus norvegicus GN=LOC688963 PE=2 SV=1 - [F1LPG5_RAT]	4.58556	16.28	4	2	2	2	6.05698e+06	129	15.055	9.81787
G3V8V0	ADP-ribosylation factor-like 2, isoform CRA_a OS=Rattus norvegicus GN=Arl2 PE=3 SV=1 - [G3V8V0_RAT]	4.58537	5.43	2	1	1	2	1.77981e+06	184	20.8508	5.96045
H6X2V2	CRP OS=Rattus norvegicus GN=crp PE=4 SV=1 - [H6X2V2_RAT]	4.54347	8.7	16	2	2	2	2.266e+06	230	25.3597	5.08447
F1M964	Mitochondrial-processing peptidase subunit alpha OS=Rattus norvegicus GN=Pmpca PE=2 SV=1 - [F1M964_RAT]	4.53782	3.64	3	2	2	2	745338	522	58.2066	7.92822
Q6AXQ0	SUMO-activating enzyme subunit 1 OS=Rattus norvegicus GN=Sae1 PE=2 SV=1 - [SAE1_RAT]	4.53165	5.73	1	2	2	2	1.14676e+06	349	38.4885	5.16064
P20650	Protein phosphatase 1A OS=Rattus norvegicus GN=Ppm1a PE=1 SV=1 - [PPM1A_RAT]	4.50932	3.14	1	1	1	2	810356	382	42.3897	5.36377
P62744	AP-2 complex subunit sigma OS=Rattus norvegicus GN=Ap2s1 PE=2 SV=1 - [AP2S1_RAT]	4.47362	4.93	1	1	1	2	5.51211e+06	142	17.0067	6.17627
P97546-3	Isoform 3 of Neuroplastin OS=Rattus norvegicus GN=Nptn - [NPTN_RAT]	4.46938	6.86	4	2	2	2		277	30.8166	7.48877
Q5XIE6-2	Isoform 2 of 3-hydroxyisobutyryl-CoA hydrolase, mitochondrial OS=Rattus norvegicus GN=Hibch - [HIBCH_RAT]	4.45615	6.75	2	2	2	2	539737	311	34.5031	9.1001
B2RYQ5	Enhancer of rudimentary homolog OS=Rattus norvegicus GN=Erh PE=3 SV=1 - [B2RYQ5_RAT]	4.43335	10.58	2	1	1	2	831837	104	12.251	5.92236
M0RBK1	Phosphoribosyl pyrophosphate synthetase 1-like 1 (Predicted) OS=Rattus norvegicus GN=Prps1l1 PE=4 SV=1 - [M0RBK1_RAT]	4.41769	11.95	3	3	3	3	2.99332e+06	318	34.8299	6.53662
B6RK61	Myosin heavy chain 7B OS=Rattus norvegicus GN=Myh7b PE=2 SV=1 - [B6RK61_RAT]	4.41097	0.72	1	1	1	3		1941	221.494	5.90967
Q6AXS5-2	Isoform 2 of Plasminogen activator inhibitor 1 RNA-binding protein OS=Rattus norvegicus GN=Serbp1 - [PAIRB_RAT]	4.40792	4.08	2	1	1	1	810675	392	42.9585	8.44092
P70565	Plakoglobin OS=Rattus norvegicus GN=Jup PE=2 SV=1 - [P70565_RAT]	4.39764	1.61	2	1	1	2	270398	745	81.7258	6.11279
D4ABR6	Annexin (Fragment) OS=Rattus norvegicus GN=Anxa6 PE=2 SV=2 - [D4ABR6_RAT]	4.39289	1.79	3	1	1	2	803801	671	75.5565	5.68115
D4A9T3	Protein Hmg1l1 OS=Rattus norvegicus GN=Hmg1l1 PE=4 SV=2 - [D4A9T3_RAT]	4.38942	21.13	26	4	4	6	2.39581e+06	213	24.6621	6.15088
F1LP76	Elongator complex protein 1 OS=Rattus norvegicus GN=Ikbkap PE=2 SV=2 - [F1LP76_RAT]	4.36477	1.58	2	2	2	2	171783	1331	149.104	6.34131
O08618	Phosphoribosyl pyrophosphate synthase-associated protein 2 OS=Rattus norvegicus GN=Prpsap2 PE=2 SV=1 - [KPRB_RAT]	4.36256	2.17	1	1	1	2	1.0903e+06	369	40.8403	7.1665
D4A8F2	Uncharacterized protein OS=Rattus norvegicus GN=Rsu1 PE=2 SV=2 - [D4A8F2_RAT]	4.35596	7.34	1	2	2	2	1.82064e+06	259	29.3757	9.23193
Q5PQT4	Protein Zbtb43 OS=Rattus norvegicus GN=Zbtb43 PE=2 SV=1 - [Q5PQT4_RAT]	4.35559	1.99	1	1	1	2	6.27688e+06	503	56.619	6.06201
D3ZXK9	Purine nucleoside phosphorylase (Fragment) OS=Rattus norvegicus GN=Pnp PE=4 SV=2 - [D3ZXK9_RAT]	4.33337	6.94	2	2	2	3	667648	288	32.1441	7.82568
P43278	Histone H1.0 OS=Rattus norvegicus GN=H1f0 PE=2 SV=2 - [H10_RAT]	4.32236	9.79	1	2	2	2	4.10295e+06	194	20.8722	10.9019
Q7TP78	Aa2-258 OS=Rattus norvegicus GN=Ndufa8 PE=2 SV=1 - [Q7TP78_RAT]	4.30701	4.23	1	1	1	2	4.40622e+06	189	21.952	8.104
D4A9L2	Protein Srsf1 OS=Rattus norvegicus GN=Srsf1 PE=4 SV=1 - [D4A9L2_RAT]	4.28928	8.87	1	2	2	2	1.43774e+06	248	27.7278	10.3599
B3DMA0	Tumor protein p53-inducible protein 11 OS=Rattus norvegicus GN=Tp53i11 PE=2 SV=1 - [P5I11_RAT]	4.27508	5.29	1	1	1	2	863195	189	20.9254	9.40771
B0BNA7	Eukaryotic translation initiation factor 3 subunit I OS=Rattus norvegicus GN=Eif3i PE=2 SV=1 - [EIF3I_RAT]	4.27364	9.23	2	3	3	3	840384	325	36.4376	5.64307
P36972	Adenine phosphoribosyltransferase OS=Rattus norvegicus GN=Aprt PE=1 SV=1 - [APT_RAT]	4.2729	7.22	1	1	1	2	1725746	180	19.5334	6.56592
Q63486	Ras-related GTP-binding protein A OS=Rattus norvegicus GN=Rraga PE=1 SV=1 - [RRAGA_RAT]	4.24167	6.07	3	2	2	2	905147	313	36.5426	7.72314
Q923V4	F-box only protein 6 OS=Rattus norvegicus GN=Fbxo6 PE=2 SV=1 - [FBX6_RAT]	4.24132	3.17	1	1	1	2	924120	284	32.7655	6.85889
D4A478	Protein Ntpcr OS=Rattus norvegicus GN=Ntpcr PE=3 SV=1 - [D4A478_RAT]	4.23209	4.69	1	1	1	2	402165	192	20.8002	9.83252
Q5U214	Protein Snrpa OS=Rattus norvegicus GN=Snrpa PE=2 SV=1 - [Q5U214_RAT]	4.22389	6.41	1	1	2	2	3.03509e+06	281	31.1562	9.83252
Q63862-3	Isoform 3 of Myosin-11 OS=Rattus norvegicus GN=Myh11 - [MYH11_RAT]	4.20787	1.55	7	2	2	2	521412	1293	148.638	6.29053
A8USN8	Chloride intracellular channel 1 OS=Rattus norvegicus PE=2 SV=1 - [A8USN8_RAT]	4.19576	9.33	2	1	2	3	436262	193	21.4903	7.02002
P25286-2	Isoform II of V-type proton ATPase 116 kDa subunit a isoform 1 OS=Rattus norvegicus GN=Atp6v0a1 - [VPP1_RAT]	4.18454	2.64	6	2	2	3	563322	832	95.5949	6.66846
Q6P685	Eukaryotic translation initiation factor 2, subunit 2 (Beta) OS=Rattus norvegicus GN=Eif2s2 PE=2 SV=1 - [Q6P685_RAT]	4.17186	5.41	1	2	2	2	757282	333	38.2193	5.79541
Q5D023	Dync1li2 protein OS=Rattus norvegicus GN=Dync1li2 PE=2 SV=1 - [Q5D023_RAT]	4.16644	5.28	6	2	2	3	895685	492	54.0805	6.16357
I6L9G6	Protein Tardbp OS=Rattus norvegicus GN=Tardbp PE=2 SV=1 - [I6L9G6_RAT]	4.16034	10.18	1	3	3	3	1.864e+06	285	32.1271	6.99072
Q6QI16	LRRGT00192 OS=Rattus norvegicus GN=RGD1304704 PE=2 SV=1 - [Q6QI16_RAT]	4.15496	8.45	2	3	3	4	2.43766e+06	296	33.8038	8.63135
D3ZPR0	Chromosome segregation 1-like (S. cerevisiae) (Predicted) OS=Rattus norvegicus GN=Cse1l PE=4 SV=1 - [D3ZPR0_RAT]	4.15455	1.65	1	2	2	3	28016642	971	110.144	5.77002
M0R5B0	Uncharacterized protein (Fragment) OS=Rattus norvegicus PE=4 SV=1 - [M0R5B0_RAT]	4.15379	4.28	2	2	2	3	720074	374	43.0437	9.26123
D4ADU2	Protein Slc7a11 OS=Rattus norvegicus GN=Slc7a11 PE=4 SV=1 - [D4ADU2_RAT]	4.14578	2.19	1	1	1	2	1.35716e+06	502	55.4059	9.23193
F1LZZ2	Uncharacterized protein OS=Rattus norvegicus PE=4 SV=2 - [F1LZZ2_RAT]	4.13167	7.17	8	2	2	2	1.46228e+06	265	28.1553	6.99072
M0R809	Protein Gng4 OS=Rattus norvegicus GN=Gng4 PE=4 SV=1 - [M0R809_RAT]	4.13051	30.67	2	1	2	2	241538	75	8.39918	7.07861
P01041	Cystatin-B OS=Rattus norvegicus GN=Cstb PE=1 SV=1 - [CYTB_RAT]	4.12906	11.22	1	1	1	2	4.34909e+06	98	11.1886	6.30322
Q499R8	Hnrph1 protein OS=Rattus norvegicus GN=Hnrph1 PE=2 SV=1 - [Q499R8_RAT]	4.12255	8.7	7	1	1	3	467366	184	20.5673	5.2876
Q3MHS7	GDP-mannose 4, 6-dehydratase OS=Rattus norvegicus GN=Gmds PE=2 SV=1 - [Q3MHS7_RAT]	4.11235	4.03	1	2	2	2	856867	372	42.0683	7.28369
B2GV24	E3 UFM1-protein ligase 1 OS=Rattus norvegicus GN=Ufl1 PE=2 SV=1 - [UFL1_RAT]	4.1061	2.77	1	2	2	2	593303	793	89.5294	6.99072
D3ZN61	Leucine-rich repeat LGI family, member 3 (Predicted), isoform CRA_b OS=Rattus norvegicus GN=Lgi3 PE=4 SV=1 - [D3ZN61_RAT]	4.07829	1.82	1	1	1	2		548	61.9186	8.1626
D3ZN79	Protein LOC686074 OS=Rattus norvegicus GN=LOC681918 PE=3 SV=1 - [D3ZN79_RAT]	4.07371	8.13	3	1	1	2	2.65605e+06	123	14.4894	10.8286
B5DFM4	RGD1309922 protein (Fragment) OS=Rattus norvegicus GN=RGD1309922 PE=2 SV=1 - [B5DFM4_RAT]	4.07286	3.04	2	1	1	2	271374	296	33.4038	4.86865
P62749	Hippocalcin-like protein 1 OS=Rattus norvegicus GN=Hpcal1 PE=1 SV=2 - [HPCL1_RAT]	4.06448	4.15	1	1	1	2	950135	193	22.324	5.50342
D3ZSE0	40S ribosomal protein S21 OS=Rattus norvegicus GN=LOC100363012 PE=3 SV=1 - [D3ZSE0_RAT]	4.05888	22.89	2	2	2	3	1.34387e+06	83	9.09351	8.51416
D4A7D9	Uncharacterized protein OS=Rattus norvegicus GN=Prss2 PE=2 SV=1 - [D4A7D9_RAT]	4.04865	8.23	5	1	1	1		243	25.8377	5.03369
Q7TP15	S-methyl-5'-thioadenosine phosphorylase OS=Rattus norvegicus GN=Mtap PE=2 SV=1 - [Q7TP15_RAT]	4.02158	4.6	1	1	1	1	308589	391	43.052	8.1333
P97618	Inositol monophosphate (Fragment) OS=Rattus norvegicus GN=Impa1 PE=2 SV=1 - [P97618_RAT]	4.01309	15.48	3	1	1	2	795171	84	9.55868	4.93213
Q99PD4	Actin-related protein 2/3 complex subunit 1A OS=Rattus norvegicus GN=Arpc1a PE=2 SV=1 - [ARC1A_RAT]	3.98455	4.86	4	2	2	3	2.64137e+06	370	41.5727	8.17725
Q75Q39	Mitochondrial import receptor subunit TOM70 OS=Rattus norvegicus GN=Tomm70a PE=1 SV=1 - [TOM70_RAT]	3.97806	4.59	1	3	3	3	1.79371e+06	610	67.4019	7.50342
Q6P762	Mannosidase 2, alpha B1 OS=Rattus norvegicus GN=Man2b1 PE=2 SV=1 - [Q6P762_RAT]	3.97132	3.27	1	3	3	3	584672	1009	114.255	8.66064
Q3B8P5	Psmd8 protein (Fragment) OS=Rattus norvegicus GN=Psmd8 PE=2 SV=1 - [Q3B8P5_RAT]	3.96618	5.96	3	2	2	2	1.12036e+06	285	32.3167	6.37939
F1LSM8	Dedicator of cytokinesis protein 9 OS=Rattus norvegicus GN=Dock9 PE=2 SV=2 - [F1LSM8_RAT]	3.95956	0.87	1	1	2	2	1.08847e+06	2058	234.655	7.51807
Q9JJ50-2	Isoform 2 of Hepatocyte growth factor-regulated tyrosine kinase substrate OS=Rattus norvegicus GN=Hgs - [HGS_RAT]	3.95457	2.33	4	1	2	2	899884	771	85.6924	6.25244
P63090	Pleiotrophin OS=Rattus norvegicus GN=Ptn PE=1 SV=1 - [PTN_RAT]	3.92469	5.95	1	1	1	2	782910	168	18.8566	9.59814
O70371	Annexin (Fragment) OS=Rattus norvegicus GN=Anxa5 PE=2 SV=1 - [O70371_RAT]	3.92298	2.98	3	1	1	2	649979	302	33.9444	5.10986
M0R8M3	Uncharacterized protein OS=Rattus norvegicus PE=4 SV=1 - [M0R8M3_RAT]	3.918	7.14	2	1	1	2	1.62653e+06	126	13.6082	10.0083
Q5U1X1	Oligoribonuclease, mitochondrial OS=Rattus norvegicus GN=Rexo2 PE=2 SV=1 - [ORN_RAT]	3.91176	4.22	1	1	1	2	1.29093e+06	237	26.7346	7.15186
F1M884	Uncharacterized protein (Fragment) OS=Rattus norvegicus PE=4 SV=2 - [F1M884_RAT]	3.90524	1.96	1	1	1	2	7.11389e+06	358	38.3135	9.26123
P42667	Signal peptidase complex catalytic subunit SEC11A OS=Rattus norvegicus GN=Sec11a PE=2 SV=1 - [SC11A_RAT]	3.89727	4.47	2	1	1	2		179	20.586	9.17334
B5DFC8	Eukaryotic translation initiation factor 3 subunit C OS=Rattus norvegicus GN=Eif3c PE=2 SV=1 - [EIF3C_RAT]	3.8893	2.2	1	2	2	2	470287	911	105.369	5.78271
Q62825	Exocyst complex component 3 OS=Rattus norvegicus GN=Exoc3 PE=1 SV=1 - [EXOC3_RAT]	3.88644	2.78	1	1	2	3		755	86.4415	6.11279
B2RYJ5	Protein Tmprss13 OS=Rattus norvegicus GN=Tmprss13 PE=2 SV=1 - [B2RYJ5_RAT]	3.88117	1.48	1	1	1	2	7.32587e+06	539	59.2236	8.88037
G3V8Q6	Protein kinase, cAMP-dependent, regulatory, type 2, alpha, isoform CRA_a OS=Rattus norvegicus GN=Prkar2a PE=4 SV=1 - [G3V8Q6_RAT]	3.87891	2.74	2	1	1	2	1.24905e+06	401	45.4517	4.93213
Q9EQH5	C-terminal-binding protein 2 OS=Rattus norvegicus GN=Ctbp2 PE=1 SV=2 - [CTBP2_RAT]	3.87855	4.27	2	1	2	2	2.73279e+06	445	48.9561	6.94678
M0RCV0	Uncharacterized protein (Fragment) OS=Rattus norvegicus PE=4 SV=1 - [M0RCV0_RAT]	3.86857	8.13	2	2	2	2	814439	283	31.0426	5.96045
B2RYT5	Cox7a2l protein OS=Rattus norvegicus GN=Cox7a2l PE=4 SV=1 - [B2RYT5_RAT]	3.86671	10.62	2	1	1	2	1.05296e+06	113	12.6426	9.77393
P82808	Glutamine--fructose-6-phosphate aminotransferase [isomerizing] 1 OS=Rattus norvegicus GN=Gfpt1 PE=1 SV=3 - [GFPT1_RAT]	3.85438	2.35	11	1	2	3	695786	681	76.7783	6.84424
Q5M7W5	Microtubule-associated protein 4 OS=Rattus norvegicus GN=Map4 PE=1 SV=1 - [MAP4_RAT]	3.85129	2.93	2	3	3	3	926051	1057	110.233	4.729
D3ZGQ2	Protein Tk2 OS=Rattus norvegicus GN=Tk2 PE=4 SV=1 - [D3ZGQ2_RAT]	3.83782	3.33	1	1	1	2	590881	270	31.0688	7.48877
P35745	Acylphosphatase-2 OS=Rattus norvegicus GN=Acyp2 PE=1 SV=2 - [ACYP2_RAT]	3.83392	22.68	2	2	2	2	1.58573e+06	97	10.8565	9.26123
D3ZJH9	Malic enzyme OS=Rattus norvegicus GN=Me2 PE=3 SV=1 - [D3ZJH9_RAT]	3.83318	4.11	1	2	2	2	1.11993e+06	584	65.3097	7.75244
A3FM27	Mitochondrial chloride intracellular channel 4 OS=Rattus norvegicus GN=Clic4 PE=2 SV=1 - [A3FM27_RAT]	3.82295	8.7	5	1	2	2	371720	253	28.6186	5.59229
D4A2K1	Protein Hoga1 OS=Rattus norvegicus GN=Hoga1 PE=4 SV=1 - [D4A2K1_RAT]	3.82183	6.85	1	2	2	2	648738	321	34.4429	8.23584
D3ZVR7	Prostamide/prostaglandin F synthase OS=Rattus norvegicus GN=Fam213b PE=3 SV=1 - [PGFS_RAT]	3.81017	4.48	1	1	1	2	1.19168e+06	201	21.5932	6.02393
Q4G022	Asna1 protein (Fragment) OS=Rattus norvegicus GN=Asna1 PE=2 SV=1 - [Q4G022_RAT]	3.79382	3.04	2	1	1	2	1.02098e+06	329	36.9227	5.13525
D4ADD7	Glutaredoxin 5 homolog (S. cerevisiae) (Predicted), isoform CRA_b OS=Rattus norvegicus GN=Glrx5 PE=4 SV=1 - [D4ADD7_RAT]	3.78987	9.21	1	1	1	1	559310	152	16.4215	7.28369
D3ZZN4	Protein LOC100362338 OS=Rattus norvegicus GN=LOC100362338 PE=4 SV=1 - [D3ZZN4_RAT]	3.78099	19.09	4	2	2	3	885457	110	12.6148	11.0483
P00406	Cytochrome c oxidase subunit 2 OS=Rattus norvegicus GN=Mtco2 PE=2 SV=2 - [COX2_RAT]	3.77387	4.41	3	1	1	2	272033	227	25.9251	4.729
M0R4W7	Uncharacterized protein (Fragment) OS=Rattus norvegicus PE=4 SV=1 - [M0R4W7_RAT]	3.74864	1.23	2	1	1	2	2.43732e+06	489	56.5375	8.14795
D3Z8B8	Protein Egfl6 OS=Rattus norvegicus GN=Egfl6 PE=4 SV=2 - [D3Z8B8_RAT]	3.74453	1.36	1	1	1	2	5.63997e+06	515	57.3456	8.73389
M0R6L4	Protein LOC100365839 OS=Rattus norvegicus GN=LOC100365839 PE=4 SV=1 - [M0R6L4_RAT]	3.73984	11.36	3	3	3	4	3.39033e+06	264	29.8887	9.72998
D3ZMY7	Protein Nt5c2 (Fragment) OS=Rattus norvegicus GN=Nt5c2 PE=4 SV=2 - [D3ZMY7_RAT]	3.73902	3.21	2	2	2	3	676021	529	61.2195	5.90967
P70566	Tropomodulin-2 OS=Rattus norvegicus GN=Tmod2 PE=1 SV=1 - [TMOD2_RAT]	3.72856	6.84	1	2	2	2	1.67121e+06	351	39.4676	5.42725
P50475	Alanine--tRNA ligase, cytoplasmic OS=Rattus norvegicus GN=Aars PE=1 SV=3 - [SYAC_RAT]	3.72745	3.31	1	3	3	3	1.07067e+06	968	106.723	5.61768
Q8CFD0	Sideroflexin-5 OS=Rattus norvegicus GN=Sfxn5 PE=2 SV=1 - [SFXN5_RAT]	3.72612	2.63	1	1	1	3	1.27507e+06	342	37.2808	9.43701
Q63555	SP120 OS=Rattus norvegicus GN=Hnrnpu PE=2 SV=1 - [Q63555_RAT]	3.72342	1.88	2	1	1	1	673986	798	87.6936	6.23975
Q80ZG0	Synembryn-B OS=Rattus norvegicus GN=Ric8b PE=1 SV=1 - [RIC8B_RAT]	3.7205	3.85	1	1	1	5		520	58.3532	5.63037
Q5I0K3-2	Isoform 2 of Citrate lyase subunit beta-like protein, mitochondrial OS=Rattus norvegicus GN=Clybl - [CLYBL_RAT]	3.70969	3.27	2	1	1	2	639520	275	30.303	8.82178
Q5PQJ6	Pyrroline-5-carboxylate reductase 3 OS=Rattus norvegicus GN=Pycrl PE=2 SV=1 - [P5CR3_RAT]	3.70016	7.66	1	2	2	2	997822	274	28.8598	7.06396
Q924S5	Lon protease homolog, mitochondrial OS=Rattus norvegicus GN=Lonp1 PE=2 SV=1 - [LONM_RAT]	3.68258	0.95	1	1	1	2		950	105.726	6.59521
A0JPN0	Protein Rad18 OS=Rattus norvegicus GN=Rad18 PE=2 SV=1 - [A0JPN0_RAT]	3.68101	1.42	1	1	1	2	1.2331e+07	494	55.9733	8.17725
M0R4Y5	Uncharacterized protein (Fragment) OS=Rattus norvegicus PE=4 SV=1 - [M0R4Y5_RAT]	3.67109	2.96	5	1	1	2	910994	304	31.6856	5.03369
O88953	Dlg 2 (Fragment) OS=Rattus norvegicus GN=Mpp2 PE=2 SV=1 - [O88953_RAT]	3.67077	5.13	2	1	1	2	233268	234	25.3913	5.42725
G3V9E4	Acylamino-acid-releasing enzyme OS=Rattus norvegicus GN=Apeh PE=4 SV=1 - [G3V9E4_RAT]	3.67063	2.05	2	1	1	1	587244	732	81.3154	5.73193
M0R5H9	Uncharacterized protein OS=Rattus norvegicus PE=4 SV=1 - [M0R5H9_RAT]	3.65898	6.27	3	1	1	1	292242	319	34.4568	9.5542
P06765	Platelet factor 4 OS=Rattus norvegicus GN=Pf4 PE=1 SV=1 - [PLF4_RAT]	3.64867	15.24	1	1	1	1	243454	105	11.2793	9.49561
Q6PST4	Atlastin-1 OS=Rattus norvegicus GN=Atl1 PE=1 SV=1 - [ATLA1_RAT]	3.64544	3.41	1	2	2	3	1.59509e+06	558	63.3353	6.1001
G3V9J7	Rab GTPase-binding effector protein 1 OS=Rattus norvegicus GN=Rabep1 PE=4 SV=1 - [G3V9J7_RAT]	3.64296	3.25	2	2	3	4	1.54904e+06	862	99.3234	4.98291
F1LZF8	Protein Nkain1 (Fragment) OS=Rattus norvegicus GN=Nkain1 PE=4 SV=1 - [F1LZF8_RAT]	3.63077	3.17	4	1	1	2	1.03026e+07	189	21.6219	5.16064
M0RAX7	Uncharacterized protein (Fragment) OS=Rattus norvegicus PE=4 SV=1 - [M0RAX7_RAT]	3.62582	6.12	3	1	2	3	554710	278	30.9629	7.47412
P62907	60S ribosomal protein L10a OS=Rattus norvegicus GN=Rpl10a PE=1 SV=2 - [RL10A_RAT]	3.62047	12.9	7	3	3	3	1.63765e+06	217	24.8155	9.93506
Q6AY58	B-cell receptor-associated protein 31 OS=Rattus norvegicus GN=Bcap31 PE=2 SV=1 - [Q6AY58_RAT]	3.60658	3.27	1	1	1	2	616783	245	27.894	8.88037
D3ZBN0	Histone H1.5 OS=Rattus norvegicus GN=Hist1h1b PE=3 SV=1 - [H15_RAT]	3.60382	10.36	1	2	2	2	1.60595e+06	222	22.6355	10.9604
P55770	NHP2-like protein 1 OS=Rattus norvegicus GN=Nhp2l1 PE=2 SV=4 - [NH2L1_RAT]	3.58928	9.38	1	1	1	1	1.56957e+06	128	14.1646	8.45557
D3ZTH8	Protein LOC689899 OS=Rattus norvegicus GN=LOC689899 PE=3 SV=1 - [D3ZTH8_RAT]	3.57095	13.46	10	2	2	2	895036	156	17.7421	10.3892
Q6LCA5	CAMP-dependent protein kinase type I regulatory subunit (Fragment) OS=Rattus norvegicus GN=Prkar1a PE=2 SV=1 - [Q6LCA5_RAT]	3.57042	6.8	2	1	1	1	562208	250	28.1824	4.93213
Q63798	Proteasome activator complex subunit 2 OS=Rattus norvegicus GN=Psme2 PE=2 SV=3 - [PSME2_RAT]	3.56833	3.78	1	1	1	2	479591	238	26.84	5.71924
D4A415	Protein Fam175b OS=Rattus norvegicus GN=Fam175b PE=4 SV=2 - [D4A415_RAT]	3.55463	2.6	1	1	1	1	234636	423	47.7754	6.06201
D3ZQ40	Glyceraldehyde-3-phosphate dehydrogenase OS=Rattus norvegicus PE=3 SV=1 - [D3ZQ40_RAT]	3.5446	5.5	1	1	1	1		309	34.6075	7.94287
P80385	5'-AMP-activated protein kinase subunit gamma-1 OS=Rattus norvegicus GN=Prkag1 PE=1 SV=3 - [AAKG1_RAT]	3.54154	6.36	4	2	2	2	650327	330	37.3627	6.96143
M0R8P6	Protein Wwc3 OS=Rattus norvegicus GN=Wwc3 PE=4 SV=1 - [M0R8P6_RAT]	3.54066	1.28	12	1	2	3	441061	1090	123.986	6.50732
D3ZB78	Protein RGD1559864 OS=Rattus norvegicus GN=RGD1559864 PE=2 SV=1 - [D3ZB78_RAT]	3.53352	3.31	2	1	1	1	267941	363	41.1892	5.43994
M0R5N3	Uncharacterized protein (Fragment) OS=Rattus norvegicus PE=4 SV=1 - [M0R5N3_RAT]	3.53303	12	3	3	4	5	1.4198e+06	250	28.1163	7.89893
Q3KRD5	Mitochondrial import receptor subunit TOM34 OS=Rattus norvegicus GN=Tomm34 PE=2 SV=1 - [TOM34_RAT]	3.49751	7.12	1	2	2	2	158513	309	34.4399	9.12939
B1H223	Down syndrome critical region gene 3 OS=Rattus norvegicus GN=Dscr3 PE=2 SV=1 - [B1H223_RAT]	3.48438	2.69	2	1	1	2	379342	297	32.8872	7.6792
B5DEN9	Vacuolar protein sorting-associated protein 28 homolog OS=Rattus norvegicus GN=Vps28 PE=2 SV=1 - [VPS28_RAT]	3.47832	6.58	1	1	1	1		228	26.093	5.52881
B2RZ66	Protein Srp19 OS=Rattus norvegicus GN=Srp19 PE=2 SV=1 - [B2RZ66_RAT]	3.46937	10.42	1	1	1	1	228565	144	16.1274	9.84717
P86182	Coiled-coil domain-containing protein 22 OS=Rattus norvegicus GN=Ccdc22 PE=1 SV=2 - [CCD22_RAT]	3.4633	3.03	1	2	2	3	377195	627	70.8109	6.11279
D3ZNK4	HIV-1 Rev binding protein-like (Predicted) OS=Rattus norvegicus GN=Agfg2 PE=4 SV=1 - [D3ZNK4_RAT]	3.45936	3.07	1	1	1	2	4.35935e+06	293	29.1432	8.5874
P62775	Myotrophin OS=Rattus norvegicus GN=Mtpn PE=1 SV=2 - [MTPN_RAT]	3.43919	14.41	1	1	1	1	1.83895e+06	118	12.8526	5.51611
Q68FT7	Phenylalanyl-tRNA synthetase, beta subunit OS=Rattus norvegicus GN=Farsb PE=2 SV=1 - [Q68FT7_RAT]	3.42198	2.38	1	1	1	1	1.62743e+06	589	65.6094	7.04932
D4A447	Protein Cd109 OS=Rattus norvegicus GN=Cd109 PE=4 SV=2 - [D4A447_RAT]	3.40402	0.49	1	1	1	2		1442	161.784	6.48096
M0R6X5	Uncharacterized protein (Fragment) OS=Rattus norvegicus PE=4 SV=1 - [M0R6X5_RAT]	3.40197	12.7	1	1	2	4	3.81642e+06	126	13.3404	10.6089
Q5XIE8	Integral membrane protein 2B OS=Rattus norvegicus GN=Itm2b PE=2 SV=1 - [ITM2B_RAT]	3.40175	3.38	1	1	1	2	563774	266	30.2943	5.30029
P18427	Follitropin subunit beta OS=Rattus norvegicus GN=Fshb PE=2 SV=2 - [FSHB_RAT]	3.38288	6.15	1	1	1	2	2.21784e+06	130	14.8038	6.26514
Q76EQ0	Serine racemase OS=Rattus norvegicus GN=Srr PE=1 SV=1 - [SRR_RAT]	3.37696	4.8	1	1	1	1	208813	333	35.6707	6.02393
B2RYN1	Fructosamine-3-kinase-related protein OS=Rattus norvegicus GN=Fn3krp PE=2 SV=1 - [B2RYN1_RAT]	3.34897	4.85	1	2	2	3	2.28429e+06	309	34.1471	7.88428
Q4KM73	UMP-CMP kinase OS=Rattus norvegicus GN=Cmpk1 PE=1 SV=2 - [KCY_RAT]	3.34092	4.08	1	1	1	2	1557984	196	22.1552	5.8335
D3ZDU2	Protein Rptor OS=Rattus norvegicus GN=Rptor PE=4 SV=2 - [D3ZDU2_RAT]	3.33851	0.75	1	1	1	2		1335	149.397	6.87354
Q6P5P5	Mesoderm-specific transcript homolog protein OS=Rattus norvegicus GN=Mest PE=2 SV=1 - [MEST_RAT]	3.32532	5.67	2	2	2	2	909398	335	38.8546	9.74463
F1LX35	Protein Tnfrsf13b (Fragment) OS=Rattus norvegicus GN=Tnfrsf13b PE=4 SV=1 - [F1LX35_RAT]	3.27977	4.02	1	1	1	2	3.59714e+07	249	27.5242	8.41162
Q5U3Z7	Serine hydroxymethyltransferase OS=Rattus norvegicus GN=Shmt2 PE=2 SV=1 - [Q5U3Z7_RAT]	3.27615	2.58	1	1	1	1	876642	504	55.7296	8.20654
Q5PPJ6	Leucyl-tRNA synthetase OS=Rattus norvegicus GN=Lars PE=2 SV=1 - [Q5PPJ6_RAT]	3.27113	1.19	1	1	1	1	344024	1178	134.192	7.28369
F1M7L6	Secretogranin III, isoform CRA_a OS=Rattus norvegicus GN=Scg3 PE=2 SV=2 - [F1M7L6_RAT]	3.26803	2.76	2	1	1	1	571192	471	53.2199	5.07178
G3V7Q6	Proteasome subunit beta type OS=Rattus norvegicus GN=Psmb5 PE=3 SV=1 - [G3V7Q6_RAT]	3.22045	4.94	1	1	1	1	1.41201e+06	263	28.5412	7.02002
Q6AXY8	Dehydrogenase/reductase (SDR family) member 1 OS=Rattus norvegicus GN=Dhrs1 PE=2 SV=1 - [Q6AXY8_RAT]	3.20074	3.83	1	1	1	1	765900	313	33.9934	8.20654
Q5XIA1	Nicalin OS=Rattus norvegicus GN=Ncln PE=2 SV=1 - [NCLN_RAT]	3.12228	3.55	1	2	2	2	700196	563	62.9525	6.58057
P17425	Hydroxymethylglutaryl-CoA synthase, cytoplasmic OS=Rattus norvegicus GN=Hmgcs1 PE=1 SV=1 - [HMCS1_RAT]	3.09586	2.5	1	1	1	1	267005	520	57.3974	5.88428
D3ZZL3	Protein Naglu OS=Rattus norvegicus GN=Naglu PE=4 SV=2 - [D3ZZL3_RAT]	3.09553	2.03	1	1	1	1	557464	739	82.3597	6.25244
B2GUV5	ATPase, H transporting, lysosomal V1 subunit G1 OS=Rattus norvegicus GN=Atp6v1g1 PE=4 SV=1 - [B2GUV5_RAT]	3.07953	9.32	1	1	1	1	996537	118	13.702	7.28369
P31662	Sodium-dependent neutral amino acid transporter SLC6A17 OS=Rattus norvegicus GN=Slc6a17 PE=1 SV=1 - [S6A17_RAT]	3.07423	1.65	1	1	1	1	677348	727	81.0024	6.41748
Q8VIL3	ZW10 interactor OS=Rattus norvegicus GN=Zwint PE=1 SV=1 - [ZWINT_RAT]	3.07317	6.77	1	1	1	1	221587	266	30.1237	6.1001
P52296	Importin subunit beta-1 OS=Rattus norvegicus GN=Kpnb1 PE=1 SV=1 - [IMB1_RAT]	3.06943	1.71	2	1	1	1	260746	875	97.062	4.76709
B4F763	Vps53 protein OS=Rattus norvegicus GN=Vps53 PE=2 SV=1 - [B4F763_RAT]	3.06928	1.49	2	1	1	1		803	91.0703	6.60986
P33124	Long-chain-fatty-acid--CoA ligase 6 OS=Rattus norvegicus GN=Acsl6 PE=1 SV=1 - [ACSL6_RAT]	3.06349	1.87	3	1	1	1	524054	697	78.1299	7.10791
M0R7F3	Protein LOC682937 OS=Rattus norvegicus GN=LOC682937 PE=4 SV=1 - [M0R7F3_RAT]	3.06145	2.4	1	1	1	1	821759	501	54.8245	6.60986
G3V912	Protein Tmx4 OS=Rattus norvegicus GN=Tmx4 PE=4 SV=1 - [G3V912_RAT]	3.04978	3.57	1	1	1	1	659654	336	37.517	4.34814
D4AEH9	Amylo-1, 6-glucosidase, 4-alpha-glucanotransferase (Glycogen debranching enzyme, glycogen storage disease type III) (Predicted), isoform CRA_a OS=Rattus norvegicus GN=Agl PE=4 SV=1 - [D4AEH9_RAT]	3.04025	0.78	1	1	1	1	276518	1532	174.22	6.7417
D4A9W3	Protein RGD1311756 OS=Rattus norvegicus GN=RGD1311756 PE=4 SV=1 - [D4A9W3_RAT]	3.03073	2.1	1	1	1	1	390917	618	66.0141	6.68311
Q9Z2L0	Voltage-dependent anion-selective channel protein 1 OS=Rattus norvegicus GN=Vdac1 PE=1 SV=4 - [VDAC1_RAT]	3.03032	3.89	2	1	1	1	1.92191e+06	283	30.7366	8.54346
Q91XV6-2	Isoform 2 of FXYD domain-containing ion transport regulator 6 OS=Rattus norvegicus GN=Fxyd6 - [FXYD6_RAT]	3.01406	11.83	2	1	1	1	726943	93	10.3104	5.10986
G3V774	F-box only protein 2 OS=Rattus norvegicus GN=Fbxo2 PE=4 SV=1 - [G3V774_RAT]	3.00786	4.05	2	1	1	1	825028	296	33.6519	4.33545
E9PU28	Inosine-5'-monophosphate dehydrogenase 2 OS=Rattus norvegicus GN=Impdh2 PE=3 SV=1 - [IMDH2_RAT]	3.0045	2.33	2	1	1	1	976907	514	55.7798	7.28369
O88377	Phosphatidylinositol 5-phosphate 4-kinase type-2 beta OS=Rattus norvegicus GN=Pip4k2b PE=1 SV=1 - [PI42B_RAT]	2.984	2.64	1	1	1	1	494777	416	47.2338	7.51807
Q4KLJ0	High mobility group nucleosomal binding domain 2 OS=Rattus norvegicus GN=Hmgn2 PE=4 SV=1 - [Q4KLJ0_RAT]	2.98313	18.89	1	1	1	1	62558.3	90	9.37304	9.99365
Q4V8E2	Proteasome (Prosome, macropain) 26S subunit, non-ATPase, 14 OS=Rattus norvegicus GN=Psmd14 PE=2 SV=1 - [Q4V8E2_RAT]	2.9812	4.19	1	1	1	1	983718	310	34.5546	6.52197
Q3ZB98-2	Isoform 2 of Breast carcinoma-amplified sequence 1 homolog OS=Rattus norvegicus GN=Bcas1 - [BCAS1_RAT]	2.97791	3.61	7	1	1	1	448139	499	52.1662	6.27783
M0RDJ4	Glia maturation factor beta OS=Rattus norvegicus GN=Gmfb PE=4 SV=1 - [M0RDJ4_RAT]	2.97786	7.75	2	1	1	1	822654	142	16.7395	5.43994
P26453-2	Isoform 2 of Basigin OS=Rattus norvegicus GN=Bsg - [BASI_RAT]	2.97698	5.51	2	1	1	1	323262	272	29.567	5.2749
Q8K3P6	Calcium-binding mitochondrial carrier protein SCaMC-2 OS=Rattus norvegicus GN=Slc25a25 PE=1 SV=1 - [SCMC2_RAT]	2.95572	2.13	1	1	1	1	1.77769e+06	469	52.6612	8.41162
Q3KRE2	Methyltransferase like 7A OS=Rattus norvegicus GN=Mettl7a PE=2 SV=1 - [Q3KRE2_RAT]	2.94243	6.15	1	1	1	1	210221	244	28.1234	8.45557
D3ZQD3	Oxoglutarate dehydrogenase-like (Predicted), isoform CRA_a OS=Rattus norvegicus GN=Ogdhl PE=4 SV=1 - [D3ZQD3_RAT]	2.91862	2.14	1	1	2	2	3.69784e+06	1029	116.638	6.87354
B0BN65	Family with sequence similarity 49, member A OS=Rattus norvegicus GN=Fam49a PE=2 SV=1 - [B0BN65_RAT]	2.91661	4.33	1	1	1	1	478461	323	37.3047	6.01123
P43425	Guanine nucleotide-binding protein G(I)/G(S)/G(O) subunit gamma-7 OS=Rattus norvegicus GN=Gng7 PE=2 SV=2 - [GBG7_RAT]	2.90546	23.53	1	1	1	1	264167	68	7.51894	8.51416
P06349	Histone H1t OS=Rattus norvegicus GN=Hist1h1t PE=1 SV=2 - [H1T_RAT]	2.90005	16.35	1	1	2	3	1.19216e+07	208	21.7122	11.7808
F1M572	Uncharacterized protein OS=Rattus norvegicus GN=Kat3 PE=4 SV=2 - [F1M572_RAT]	2.89006	2.7	2	1	1	1	934039	444	50.0148	7.89893
Q5M821	Protein phosphatase 1H OS=Rattus norvegicus GN=Ppm1h PE=2 SV=2 - [PPM1H_RAT]	2.8888	2.92	1	1	1	1	679219	513	56.3447	6.72705
Q5U2N0	CTP synthase 2 OS=Rattus norvegicus GN=Ctps2 PE=2 SV=1 - [PYRG2_RAT]	2.88575	3.58	2	2	2	2	708158	586	65.6317	6.39209
F1M9A7	Acyl-coenzyme A oxidase OS=Rattus norvegicus GN=Acox3 PE=2 SV=1 - [F1M9A7_RAT]	2.88223	2.15	2	1	1	1	74534	698	78.1548	8.14795
Q6PEC3-2	Isoform 2 of Protein YIF1B OS=Rattus norvegicus GN=Yif1b - [YIF1B_RAT]	2.87578	5.18	4	1	1	1	1.42829e+06	251	27.5503	9.5542
D3ZZF8	Polyadenylate binding protein-interacting protein 1 (Predicted) OS=Rattus norvegicus GN=Paip1 PE=2 SV=2 - [D3ZZF8_RAT]	2.86206	3.27	2	1	1	1	338383	367	42.0343	4.51318
Q6P791	Ragulator complex protein LAMTOR1 OS=Rattus norvegicus GN=Lamtor1 PE=1 SV=1 - [LTOR1_RAT]	2.85313	8.07	1	1	1	1	1.07727e+06	161	17.7098	5.021
F1LNM0	Disks large homolog 1 OS=Rattus norvegicus GN=Dlg1 PE=2 SV=1 - [F1LNM0_RAT]	2.84927	1.32	2	1	1	1	735958	911	100.546	5.94775
F1LS86	Isoleucine-tRNA synthetase (Predicted) OS=Rattus norvegicus GN=Iars PE=2 SV=2 - [F1LS86_RAT]	2.84132	0.95	1	1	1	1	260537	1262	144.194	6.30322
Q6AY18	Protein Sar1a OS=Rattus norvegicus GN=Sar1a PE=2 SV=1 - [Q6AY18_RAT]	2.81143	6.06	1	1	1	1	4.43145e+06	198	22.3845	6.68311
B2RYG6	Ubiquitin thioesterase OTUB1 OS=Rattus norvegicus GN=Otub1 PE=1 SV=1 - [OTUB1_RAT]	2.80202	4.43	1	1	1	1	1.18749e+06	271	31.2504	4.94482
Q4FZY0	EF-hand domain-containing protein D2 OS=Rattus norvegicus GN=Efhd2 PE=1 SV=1 - [EFHD2_RAT]	2.7996	5.02	1	1	1	1	801114	239	26.7425	5.07178
B2RYF6	Cleft lip and palate associated transmembrane protein 1 OS=Rattus norvegicus GN=Clptm1 PE=2 SV=1 - [B2RYF6_RAT]	2.79451	2.26	1	1	1	1	384041	664	75.2288	6.01123
D3ZQ57	Plexin B2 OS=Rattus norvegicus GN=Plxnb2 PE=4 SV=1 - [D3ZQ57_RAT]	2.78953	0.71	1	1	1	1	333247	1841	205.818	5.98584
D3ZFA8	Protein LOC100362366 OS=Rattus norvegicus GN=LOC100364909 PE=3 SV=1 - [D3ZFA8_RAT]	2.77098	8.15	4	1	1	1	7.30897e+06	135	15.4583	9.77393
D3ZFK6	Protein Atg16l1 OS=Rattus norvegicus GN=Atg16l1 PE=2 SV=1 - [D3ZFK6_RAT]	2.76442	3.13	1	1	1	3		607	67.9207	6.29053
B0BMT9	Protein Sqrdl OS=Rattus norvegicus GN=Sqrdl PE=2 SV=1 - [B0BMT9_RAT]	2.76125	3.11	1	1	1	1	387883	450	50.1698	9.0708
P08011	Microsomal glutathione S-transferase 1 OS=Rattus norvegicus GN=Mgst1 PE=1 SV=3 - [MGST1_RAT]	2.76063	12.26	1	2	2	2	764676	155	17.4602	9.61279
D3ZI67	Brain-specific angiogenesis inhibitor 1-associated protein 2 OS=Rattus norvegicus GN=Baiap2 PE=2 SV=2 - [D3ZI67_RAT]	2.75364	3.02	4	1	1	1	296754	430	47.0678	9.18799
Q1JU69	ZH11 protein OS=Rattus norvegicus GN=Cops7a PE=2 SV=1 - [Q1JU69_RAT]	2.74653	5.24	3	1	1	1	1.31468e+06	229	25.3044	8.23584
O89000	Dihydropyrimidine dehydrogenase [NADP(+)] OS=Rattus norvegicus GN=Dpyd PE=2 SV=1 - [DPYD_RAT]	2.74612	1.27	1	1	1	1		1025	111.395	6.771
Q642E3	CDK5 regulatory subunit associated protein 3, isoform CRA_b OS=Rattus norvegicus GN=Cdk5rap3 PE=2 SV=1 - [Q642E3_RAT]	2.7229	2.78	2	1	1	1	750976	504	57.0991	4.84326
P97538	Ras-related protein M-Ras OS=Rattus norvegicus GN=Mras PE=1 SV=2 - [RASM_RAT]	2.71924	5.29	2	1	1	1	2.0898e+06	208	23.8724	8.77783
M0RAV0	Uncharacterized protein (Fragment) OS=Rattus norvegicus PE=4 SV=1 - [M0RAV0_RAT]	2.71789	13.98	8	1	1	1	860676	93	10.1229	7.12256
B0K008	Eukaryotic translation initiation factor 1 OS=Rattus norvegicus GN=Eif1 PE=4 SV=1 - [B0K008_RAT]	2.69917	12.39	2	1	1	1	816273	113	12.7386	7.44482
A0JPJ7	Obg-like ATPase 1 OS=Rattus norvegicus GN=Ola1 PE=2 SV=1 - [OLA1_RAT]	2.69513	6.31	1	2	2	2	1.76781e+06	396	44.5072	7.76709
P50398	Rab GDP dissociation inhibitor alpha OS=Rattus norvegicus GN=Gdi1 PE=1 SV=1 - [GDIA_RAT]	2.69429	4.47	2	1	2	2	1.2385e+06	447	50.5042	5.13525
Q9EQZ1	TSC22 domain family protein 3 OS=Rattus norvegicus GN=Tsc22d3 PE=2 SV=1 - [T22D3_RAT]	2.69163	11.94	1	1	1	1		134	14.8264	4.56396
Q5FVI6	V-type proton ATPase subunit C 1 OS=Rattus norvegicus GN=Atp6v1c1 PE=2 SV=1 - [VATC1_RAT]	2.66855	2.36	1	1	1	1	1.09277e+06	382	43.8729	7.45947
Q03346	Mitochondrial-processing peptidase subunit beta OS=Rattus norvegicus GN=Pmpcb PE=1 SV=3 - [MPPB_RAT]	2.65832	2.45	1	1	1	1	2.33982e+06	489	54.2304	6.69775
D4AEP0	Adenylosuccinate synthetase OS=Rattus norvegicus GN=Adss PE=3 SV=1 - [D4AEP0_RAT]	2.6408	2.41	1	1	1	1	296038	456	50.0537	6.37939
B5DEH2	Erlin-2 OS=Rattus norvegicus GN=Erlin2 PE=1 SV=1 - [ERLN2_RAT]	2.63452	3.54	2	1	1	1	427775	339	37.6864	5.74463
Q5XI90	Dynein light chain Tctex-type 3 OS=Rattus norvegicus GN=Dynlt3 PE=1 SV=1 - [Q5XI90_RAT]	2.62579	8.62	1	1	1	1	365423	116	12.8892	5.36377
P17220	Proteasome subunit alpha type-2 OS=Rattus norvegicus GN=Psma2 PE=1 SV=3 - [PSA2_RAT]	2.61709	5.98	2	1	1	1	638390	234	25.9103	7.43018
Q9ER31	Ectonucleoside triphosphate diphosphohydrolase 6 OS=Rattus norvegicus GN=Entpd6 PE=1 SV=1 - [ENTP6_RAT]	2.6146	2.86	1	1	1	1	393546	455	49.8678	8.6167
D4AE00	Protein Ap3b2 OS=Rattus norvegicus GN=Ap3b2 PE=4 SV=1 - [D4AE00_RAT]	2.61041	1.2	1	1	1	1	516660	1082	119.068	5.63037
Q71DI1	Dermcidin OS=Rattus norvegicus GN=Dcd PE=4 SV=1 - [Q71DI1_RAT]	2.60887	10	1	1	1	1	1.23297e+06	110	11.2768	6.53662
Q5RKH0	Putative oxidoreductase GLYR1 OS=Rattus norvegicus GN=Glyr1 PE=2 SV=1 - [GLYR1_RAT]	2.60217	2.36	1	1	1	1		552	60.3829	9.12939
G3V878	Sec11-like 3 (S. cerevisiae), isoform CRA_c OS=Rattus norvegicus GN=Sec11c PE=4 SV=1 - [G3V878_RAT]	2.59086	5.21	2	1	1	1	319546	192	21.6465	9.23193
D4A0C3	Protein Hid1 OS=Rattus norvegicus GN=Hid1 PE=2 SV=1 - [D4A0C3_RAT]	2.59046	1.4	1	1	1	1	697068	788	88.6984	5.93506
Q64640	Adenosine kinase OS=Rattus norvegicus GN=Adk PE=1 SV=3 - [ADK_RAT]	2.58854	3.6	1	1	1	1		361	40.1083	6.03662
Q5U2Z3	Nucleosome assembly protein 1-like 4 OS=Rattus norvegicus GN=Nap1l4 PE=2 SV=1 - [NP1L4_RAT]	2.58558	2.85	1	1	1	1	953788	386	43.8895	4.67822
D3ZL50	Protein Ttc37 OS=Rattus norvegicus GN=Ttc37 PE=4 SV=2 - [D3ZL50_RAT]	2.58058	0.78	1	1	1	1	349173	1403	156.06	6.65381
Q4KM87	Actin-like 6A OS=Rattus norvegicus GN=Actl6a PE=2 SV=1 - [Q4KM87_RAT]	2.56864	2.33	1	1	1	1	4.12844e+06	429	47.3903	5.60498
G3V8V6	O-acetyl-ADP-ribose deacetylase MACROD1 OS=Rattus norvegicus GN=Macrod1 PE=4 SV=2 - [G3V8V6_RAT]	2.55059	4.55	2	1	1	1	1.21695e+06	242	27.1243	9.02686
Q5RKH6	Protein OS-9 OS=Rattus norvegicus GN=Os9 PE=1 SV=1 - [OS9_RAT]	2.52936	2.1	1	1	1	1	170891	666	75.3185	4.83057
F1LNV4	ATP-binding cassette sub-family B member 7, mitochondrial OS=Rattus norvegicus GN=Abcb7 PE=2 SV=2 - [F1LNV4_RAT]	2.52036	1.73	2	1	1	1	715253	752	82.703	9.29053
Q505J8	Phenylalanine--tRNA ligase alpha subunit OS=Rattus norvegicus GN=Farsa PE=1 SV=1 - [SYFA_RAT]	2.51195	2.17	1	1	1	1	362730	508	57.6837	8.27979
P31016	Disks large homolog 4 OS=Rattus norvegicus GN=Dlg4 PE=1 SV=1 - [DLG4_RAT]	2.50315	1.66	1	1	1	1	520072	724	80.4158	5.88428
G3V9N1	RCG21137 OS=Rattus norvegicus GN=Pgam5 PE=4 SV=1 - [G3V9N1_RAT]	2.50269	4.17	1	1	1	1	852680	288	31.9805	8.67529
Q45QK2	Guanine nucleotide-binding protein subunit gamma (Fragment) OS=Rattus norvegicus GN=Gng10 PE=2 SV=1 - [Q45QK2_RAT]	2.50129	36.59	2	1	1	1	402050	41	4.34418	6.30322
Q4G069	Regulator of microtubule dynamics protein 1 OS=Rattus norvegicus GN=Rmdn1 PE=2 SV=1 - [RMD1_RAT]	2.49574	8.06	2	2	2	2	273515	310	35.3782	7.73779
P19944	60S acidic ribosomal protein P1 OS=Rattus norvegicus GN=Rplp1 PE=3 SV=1 - [RLA1_RAT]	2.49431	14.04	1	1	1	1	281865	114	11.4907	4.32275
P07171	Calbindin OS=Rattus norvegicus GN=Calb1 PE=1 SV=2 - [CALB1_RAT]	2.48716	4.21	2	1	1	1	1.8645e+06	261	29.9751	4.83057
Q9JMB5	Proteasomal ubiquitin receptor ADRM1 OS=Rattus norvegicus GN=Adrm1 PE=2 SV=2 - [ADRM1_RAT]	2.48563	3.93	1	1	1	1	375271	407	42.0758	5.07178
B2RYV1	Stim1 protein (Fragment) OS=Rattus norvegicus GN=Stim1 PE=2 SV=1 - [B2RYV1_RAT]	2.47996	2.56	2	1	1	1	442299	391	45.7284	6.78564
P18437	Non-histone chromosomal protein HMG-17 OS=Rattus norvegicus GN=Hmgn2 PE=1 SV=2 - [HMGN2_RAT]	2.4797	20	1	1	1	1	1.10706e+06	90	9.35997	9.87646
D3ZJ32	Protein Esyt2 OS=Rattus norvegicus GN=Esyt2 PE=4 SV=2 - [D3ZJ32_RAT]	2.47288	1.54	1	1	1	1	332049	845	94.3567	7.28369
Q4V7D4	Family with sequence similarity 126, member B OS=Rattus norvegicus GN=Fam126b PE=2 SV=1 - [Q4V7D4_RAT]	2.46042	3.51	1	1	1	1	458199	456	50.793	7.73779
B2RYQ2	Protein Ppp2r4 OS=Rattus norvegicus GN=Ppp2r4 PE=2 SV=1 - [B2RYQ2_RAT]	2.45472	3.1	1	1	1	1	485060	323	36.5937	6.29053
Q62910-6	Isoform 6 of Synaptojanin-1 OS=Rattus norvegicus GN=Synj1 - [SYNJ1_RAT]	2.45257	1.04	6	1	1	1	344887	1158	126.088	6.18896
B2RYS1	Neurensin 1 OS=Rattus norvegicus GN=Nrsn1 PE=2 SV=1 - [B2RYS1_RAT]	2.44681	6.12	2	1	1	1	308509	196	21.6529	7.6792
O35264	Platelet-activating factor acetylhydrolase IB subunit beta OS=Rattus norvegicus GN=Pafah1b2 PE=1 SV=1 - [PA1B2_RAT]	2.43941	3.93	1	1	1	1	340244	229	25.5652	5.92236
Q498C8	Protein RER1 OS=Rattus norvegicus GN=Rer1 PE=2 SV=1 - [RER1_RAT]	2.43457	5.61	1	1	1	1	369348	196	22.9729	9.51025
M0R7K9	Protein LOC171161 (Fragment) OS=Rattus norvegicus GN=LOC171161 PE=4 SV=1 - [M0R7K9_RAT]	2.43447	10.53	2	1	1	1	2.77752e+06	114	12.9433	7.1958
P32232-2	Isoform III of Cystathionine beta-synthase OS=Rattus norvegicus GN=Cbs - [CBS_RAT]	2.42555	3.66	3	2	2	2	739542	547	60.0656	6.60986
Q99PV2	Protein Stxbp3 OS=Rattus norvegicus GN=Stxbp3 PE=2 SV=1 - [Q99PV2_RAT]	2.42531	3.2	1	1	1	1		593	67.9769	8.01611
G3V796	Acetyl-Coenzyme A dehydrogenase, medium chain OS=Rattus norvegicus GN=Acadm PE=3 SV=1 - [G3V796_RAT]	2.42185	5.23	2	2	2	2	1.50963e+06	421	46.5418	8.41162
F1LPJ1	Protein Ptprm OS=Rattus norvegicus GN=Ptprm PE=2 SV=2 - [F1LPJ1_RAT]	2.40904	1.14	1	1	1	1	913980	1486	167.14	6.65381
Q498D4	Tln1 protein OS=Rattus norvegicus GN=Tln1 PE=2 SV=1 - [Q498D4_RAT]	2.40373	0.77	2	1	1	1	280809	1552	161.877	6.23975
D4A6U4	Protein Tecpr2 OS=Rattus norvegicus GN=Tecpr2 PE=4 SV=2 - [D4A6U4_RAT]	2.40074	1.2	1	1	1	1		1417	154.712	5.2749
P67779	Prohibitin OS=Rattus norvegicus GN=Phb PE=1 SV=1 - [PHB_RAT]	2.39858	6.99	2	2	2	2	1.41552e+06	272	29.8019	5.75732
D3ZH41	Cytoskeleton-associated protein 4 (Predicted) OS=Rattus norvegicus GN=Ckap4 PE=4 SV=2 - [D3ZH41_RAT]	2.38692	6.75	1	2	2	2	683951	326	36.2937	4.81787
Q5I0D7	Xaa-Pro dipeptidase OS=Rattus norvegicus GN=Pepd PE=2 SV=1 - [PEPD_RAT]	2.38632	2.24	1	1	1	1	291752	492	54.7149	5.94775
Q9JHW5	Vesicle-associated membrane protein 7 OS=Rattus norvegicus GN=Vamp7 PE=1 SV=1 - [VAMP7_RAT]	2.38398	5.45	1	1	1	1	370470	220	24.7599	8.44092
Q5U1Y1	Ras-related protein Rab-34 OS=Rattus norvegicus GN=Rab34 PE=2 SV=1 - [RAB34_RAT]	2.38249	5.79	1	1	1	1	169375	259	29.0841	8.26514
D4AE56	Prostaglandin E synthase 2 (Predicted), isoform CRA_b OS=Rattus norvegicus GN=Ptges2 PE=4 SV=1 - [D4AE56_RAT]	2.38153	2.34	1	1	1	1	3.51914e+06	384	43.4242	9.24658
Q5U2T9	FK506 binding protein 5 OS=Rattus norvegicus GN=Fkbp5 PE=2 SV=1 - [Q5U2T9_RAT]	2.37494	2.19	1	1	1	1	1.15095e+06	456	50.9326	6.16357
Q62634	Vesicular glutamate transporter 1 OS=Rattus norvegicus GN=Slc17a7 PE=1 SV=1 - [VGLU1_RAT]	2.37371	1.96	2	1	1	1	3.17881e+06	560	61.6253	7.34229
P61023	Calcineurin B homologous protein 1 OS=Rattus norvegicus GN=Chp1 PE=1 SV=2 - [CHP1_RAT]	2.35082	6.15	1	1	1	1	436086	195	22.4183	5.09717
Q5BK32	FAS-associated factor 2 OS=Rattus norvegicus GN=Faf2 PE=2 SV=1 - [FAF2_RAT]	2.34421	3.47	1	1	1	1	862663	346	41.0538	5.96045
Q6AYS8	Estradiol 17-beta-dehydrogenase 11 OS=Rattus norvegicus GN=Hsd17b11 PE=2 SV=1 - [DHB11_RAT]	2.32664	5.03	1	1	1	1		298	32.9166	8.63135
P80299	Bifunctional epoxide hydrolase 2 OS=Rattus norvegicus GN=Ephx2 PE=1 SV=1 - [HYES_RAT]	2.32548	2.17	2	1	1	1	481207	554	62.2996	6.18896
Q6MGB5	Estradiol 17-beta-dehydrogenase 8 OS=Rattus norvegicus GN=Hsd17b8 PE=3 SV=1 - [DHB8_RAT]	2.32415	5.02	1	1	1	1	525726	259	26.7738	6.55127
F1LYI0	Protein Cecr2 OS=Rattus norvegicus GN=Cecr2 PE=4 SV=2 - [F1LYI0_RAT]	2.31469	0.49	1	1	1	1		1437	159.27	6.84424
G3V8T4	DNA damage-binding protein 1 OS=Rattus norvegicus GN=Ddb1 PE=4 SV=1 - [G3V8T4_RAT]	2.31067	1.23	2	1	1	1	857069	1140	126.86	5.26221
P70645	Bleomycin hydrolase OS=Rattus norvegicus GN=Blmh PE=1 SV=1 - [BLMH_RAT]	2.30963	2.42	2	1	1	1	436151	454	52.2888	6.48096
Q9WVK3	Peroxisomal trans-2-enoyl-CoA reductase OS=Rattus norvegicus GN=Pecr PE=2 SV=1 - [PECR_RAT]	2.30828	2.97	1	1	1	1	2.36606e+06	303	32.4126	8.68994
P06907	Myelin protein P0 OS=Rattus norvegicus GN=Mpz PE=1 SV=1 - [MYP0_RAT]	2.30049	4.84	1	1	1	1	2.11919e+06	248	27.5534	9.36377
Q5M7T2	SPRY domain-containing protein 7 OS=Rattus norvegicus GN=Spryd7 PE=2 SV=1 - [SPRY7_RAT]	2.2889	5.1	1	1	1	1	1.22782e+06	196	21.6666	6.69775
P22062	Protein-L-isoaspartate(D-aspartate) O-methyltransferase OS=Rattus norvegicus GN=Pcmt1 PE=1 SV=2 - [PIMT_RAT]	2.28592	4.85	1	1	1	1	776307	227	24.6257	7.6792
P18422	Proteasome subunit alpha type-3 OS=Rattus norvegicus GN=Psma3 PE=1 SV=3 - [PSA3_RAT]	2.28318	6.27	2	1	1	1		255	28.4011	5.43994
D4AA52	Alpha-1-inhibitor 3 OS=Rattus norvegicus GN=A1i3 PE=2 SV=2 - [D4AA52_RAT]	2.2813	1.76	7	2	2	2	544434	1476	163.637	6.1001
D4A6D7-2	Isoform 2 of Tetratricopeptide repeat protein 19, mitochondrial OS=Rattus norvegicus GN=Ttc19 - [TTC19_RAT]	2.27867	5.11	2	2	2	2	1.17137e+06	352	39.8495	6.21436
Q2M2S1	Protein Tor1b OS=Rattus norvegicus GN=Tor1b PE=2 SV=1 - [Q2M2S1_RAT]	2.27608	4.17	1	1	1	1	187362	336	37.8336	8.01611
Q05175	Brain acid soluble protein 1 OS=Rattus norvegicus GN=Basp1 PE=1 SV=2 - [BASP1_RAT]	2.27563	5.45	1	1	1	1	119897	220	21.7774	4.51318
Q45QK8	Guanine nucleotide-binding protein subunit gamma (Fragment) OS=Rattus norvegicus GN=Gng5 PE=2 SV=1 - [Q45QK8_RAT]	2.27346	15.52	3	1	1	1	1.67495e+06	58	6.40543	9.84717
Q6IMZ0	Nuclear factor interleukin-3-regulated protein OS=Rattus norvegicus GN=Nfil3 PE=2 SV=1 - [NFIL3_RAT]	2.27274	2.16	1	1	1	1	2.50735e+06	462	50.7498	7.21045
P97615	Thioredoxin, mitochondrial OS=Rattus norvegicus GN=Txn2 PE=2 SV=1 - [THIOM_RAT]	2.27195	6.02	1	1	1	1	598889	166	18.2205	7.89893
B1WC67	Protein Slc25a24 OS=Rattus norvegicus GN=Slc25a24 PE=2 SV=1 - [B1WC67_RAT]	2.26399	2.53	1	1	1	1	508089	475	52.8573	8.04541
Q6PCT3	Tumor protein D54 OS=Rattus norvegicus GN=Tpd52l2 PE=2 SV=1 - [TPD54_RAT]	2.25702	5	1	1	1	1	484374	220	23.9771	6.15088
D3ZU83	ERGIC and golgi 3 (Predicted) OS=Rattus norvegicus GN=Ergic3 PE=4 SV=1 - [D3ZU83_RAT]	2.25241	2.35	1	1	1	1	409686	383	43.1956	6.37939
Q793F9	Vacuolar protein sorting-associated protein 4A OS=Rattus norvegicus GN=Vps4a PE=2 SV=1 - [VPS4A_RAT]	2.25021	2.75	4	1	1	1	1.45703e+06	437	48.8761	7.79639
Q499V0	COMM domain containing 7 OS=Rattus norvegicus GN=Commd7 PE=2 SV=1 - [Q499V0_RAT]	2.24732	5.5	1	1	1	1	566354	200	22.5807	6.32861
M0R518	Protein GPR108 OS=Rattus norvegicus GN=Gpr108 PE=4 SV=1 - [M0R518_RAT]	2.24681	1.91	2	1	1	1	93764.8	577	64.6476	8.04541
G3V792	Cytoplasmic dynein 1 intermediate chain 1 OS=Rattus norvegicus GN=Dync1i1 PE=4 SV=2 - [G3V792_RAT]	2.24195	1.82	4	1	1	1	753347	548	61.3116	4.93213
Q9R0W5	Acid-sensing ion channel 5 OS=Rattus norvegicus GN=Asic5 PE=1 SV=1 - [ASIC5_RAT]	2.24172	4.04	1	1	1	1	507431	495	56.4278	7.98682
Q4V7D2	Protein rogdi homolog OS=Rattus norvegicus GN=Rogdi PE=2 SV=1 - [ROGDI_RAT]	2.24078	5.23	1	1	1	1		287	32.1847	8.17725
Q5XI21	Protein Tom1 OS=Rattus norvegicus GN=Tom1 PE=2 SV=1 - [Q5XI21_RAT]	2.24039	2.03	1	1	1	1		492	54.0552	4.95752
Q63353	Rat embryonic sarcomeric myosin heavy chain protein (light meromyosin portion) (Fragment) OS=Rattus norvegicus GN=Myh3 PE=2 SV=1 - [Q63353_RAT]	2.23609	7.46	3	1	1	1		134	15.2949	5.30029
P70500	CDP-diacylglycerol--inositol 3-phosphatidyltransferase OS=Rattus norvegicus GN=Cdipt PE=1 SV=1 - [CDIPT_RAT]	2.23411	5.16	1	1	1	1	1.098e+06	213	23.5972	8.26514
F8WG75	Synaptosomal-associated protein (Fragment) OS=Rattus norvegicus GN=Snap25 PE=3 SV=2 - [F8WG75_RAT]	2.22694	6.58	4	1	1	1	220671	152	17.0673	5.05908
D3ZA93	Protein Acot13 OS=Rattus norvegicus GN=Acot13 PE=4 SV=1 - [D3ZA93_RAT]	2.22487	7.14	1	1	1	1	2.5485e+06	140	15.2599	8.83643
Q6XUZ6	EG3-1RVC OS=Rattus norvegicus GN=Sept4 PE=2 SV=1 - [Q6XUZ6_RAT]	2.22282	6.41	5	1	2	2	6.04655e+06	312	36.1896	8.22119
D4A7I7	Protein Ccdc30 OS=Rattus norvegicus GN=Ccdc30 PE=4 SV=2 - [D4A7I7_RAT]	2.21787	1.68	1	1	1	1	1.68144e+06	655	76.2507	6.84424
P27274	CD59 glycoprotein OS=Rattus norvegicus GN=Cd59 PE=1 SV=2 - [CD59_RAT]	2.21196	7.14	1	1	1	1	114358	126	13.781	8.48486
D3ZAN3	Alpha glucosidase 2 alpha neutral subunit (Predicted) OS=Rattus norvegicus GN=Ganab PE=4 SV=1 - [D3ZAN3_RAT]	2.21055	1.13	1	1	1	1	2.56536e+06	797	90.5149	6.20166
Q9JLD2	Neuroserpin OS=Rattus norvegicus GN=Serpini1 PE=2 SV=1 - [NEUS_RAT]	2.20566	2.44	1	1	1	1	1.56515e+06	410	46.2481	4.77979
M0RDI5	Protein Mcu OS=Rattus norvegicus GN=Mcu PE=4 SV=1 - [M0RDI5_RAT]	2.20148	2.57	1	1	1	1	1.19883e+06	350	39.7326	8.55811
Q6AXM8	Serum paraoxonase/arylesterase 2 OS=Rattus norvegicus GN=Pon2 PE=2 SV=1 - [PON2_RAT]	2.19531	2.54	1	1	1	1	755986	354	39.5926	5.52881
Q4R1A4	TRK-fused gene protein OS=Rattus norvegicus GN=Tfg PE=2 SV=1 - [Q4R1A4_RAT]	2.191	3.55	2	1	1	1	1.50652e+06	282	31.0063	4.95752
Q5U1Z9	Metaxin 2 OS=Rattus norvegicus GN=Mtx2 PE=2 SV=1 - [Q5U1Z9_RAT]	2.18858	3.04	1	1	1	1	490340	263	29.699	5.33838
Q3ZAU6	Protein Rnf14 OS=Rattus norvegicus GN=Rnf14 PE=2 SV=1 - [Q3ZAU6_RAT]	2.17963	2.09	1	1	1	1	444926	479	54.0708	4.88135
O88629	Splicing factor 1 homolog (Fragment) OS=Rattus norvegicus GN=Sf1 PE=2 SV=1 - [O88629_RAT]	2.1795	5.78	4	1	1	1	333976	173	19.3681	8.25049
Q4V7F2	Cysteine-rich with EGF-like domain protein 1 OS=Rattus norvegicus GN=Creld1 PE=2 SV=1 - [CREL1_RAT]	2.17471	2.62	1	1	1	1	4.72573e+06	420	45.666	5.0083
Q9ES53	Ubiquitin fusion degradation protein 1 homolog OS=Rattus norvegicus GN=Ufd1l PE=1 SV=1 - [UFD1_RAT]	2.17381	4.89	1	1	1	1	482394	307	34.4633	6.69775
D4ABP4	Rab3 GTPase-activating protein non-catalytic subunit (Fragment) OS=Rattus norvegicus GN=Rab3gap2 PE=2 SV=2 - [D4ABP4_RAT]	2.17381	0.89	3	1	1	1	530051	1349	150.077	5.93506
M0RDR2	Protein LOC100909521 OS=Rattus norvegicus GN=LOC100909521 PE=4 SV=1 - [M0RDR2_RAT]	2.17369	2.16	3	1	1	1	270249	556	60.8242	4.60205
G3V6C3	Protein RGD1562502 OS=Rattus norvegicus GN=Pbdc1 PE=4 SV=1 - [G3V6C3_RAT]	2.16258	12.63	2	2	2	2	1.35563e+06	198	22.4098	4.52588
Q63041	Alpha-1-macroglobulin OS=Rattus norvegicus GN=A1m PE=1 SV=1 - [A1M_RAT]	2.15978	1.4	1	2	2	2	347250	1500	167.019	6.90283
F1LLW0	Transmembrane protein 192 (Fragment) OS=Rattus norvegicus GN=Tmem192 PE=2 SV=2 - [F1LLW0_RAT]	2.15681	3.89	2	1	1	1	292993	257	29.3329	8.42627
Q9JHB5	Translin-associated protein X OS=Rattus norvegicus GN=Tsnax PE=1 SV=1 - [TSNAX_RAT]	2.14942	3.79	1	1	1	1	924020	290	32.9846	6.55127
Q04631	Protein farnesyltransferase/geranylgeranyltransferase type-1 subunit alpha OS=Rattus norvegicus GN=Fnta PE=1 SV=1 - [FNTA_RAT]	2.14919	2.65	2	1	1	1	1.50528e+06	377	44.022	4.93213
G3V7P1	Syntaxin-12 OS=Rattus norvegicus GN=Stx12 PE=1 SV=1 - [STX12_RAT]	2.14329	3.28	1	1	1	1	319952	274	31.1679	5.32568
F1LQP9	Protein Tnpo1 (Fragment) OS=Rattus norvegicus GN=Tnpo1 PE=2 SV=2 - [F1LQP9_RAT]	2.13868	1.23	1	1	1	1	239211	897	102.077	4.97021
Q6AYS7	Aminoacylase-1A OS=Rattus norvegicus GN=Acy1a PE=1 SV=1 - [ACY1A_RAT]	2.13855	4.9	1	2	2	3	1.20196e+06	408	45.7751	6.48096
D4A9D6	DEAH (Asp-Glu-Ala-His) box polypeptide 9 (Predicted) OS=Rattus norvegicus GN=Dhx9 PE=4 SV=1 - [D4A9D6_RAT]	2.1365	1.7	1	2	2	2	634368	1174	131.647	6.354
Q6AY84	Secernin-1 OS=Rattus norvegicus GN=Scrn1 PE=1 SV=1 - [SCRN1_RAT]	2.13637	2.66	1	1	1	1	225335	414	46.3666	4.84326
F1M4M6	Protein Camta1 (Fragment) OS=Rattus norvegicus GN=Camta1 PE=2 SV=2 - [F1M4M6_RAT]	2.13148	1.7	1	1	1	3	392820	1295	140.815	7.02002
Q6JE36	Protein NDRG1 OS=Rattus norvegicus GN=Ndrg1 PE=1 SV=1 - [NDRG1_RAT]	2.12254	3.55	1	1	1	1	451716	394	42.9269	6.18896
D3ZTK5	60S ribosomal protein L27 OS=Rattus norvegicus GN=RGD1563835 PE=3 SV=1 - [D3ZTK5_RAT]	2.12127	6.67	4	1	1	1	1.73597e+06	135	15.6325	10.2866
F1LVX3	RCG55853, isoform CRA_b OS=Rattus norvegicus GN=rCG_55853 PE=4 SV=2 - [F1LVX3_RAT]	2.11877	3.33	1	1	1	1	421149	270	31.1231	8.30908
M0R920	Protein Ranbp3 OS=Rattus norvegicus GN=Ranbp3 PE=4 SV=1 - [M0R920_RAT]	2.11076	4.34	3	1	1	1	135317	438	46.6895	4.89404
F1M8Y4	Protein Deptor OS=Rattus norvegicus GN=Deptor PE=2 SV=2 - [F1M8Y4_RAT]	2.11055	4.65	1	1	1	1		409	46.1973	8.07471
Q6GQQ2	PRKCA-binding protein OS=Rattus norvegicus GN=Pick1 PE=1 SV=1 - [Q6GQQ2_RAT]	2.10996	2.88	2	1	1	1	195683	416	46.6757	5.51611
Q02356	AMP deaminase 2 OS=Rattus norvegicus GN=Ampd2 PE=2 SV=2 - [AMPD2_RAT]	2.10872	4	1	2	3	3	742201	824	94.7269	6.50732
F1LWW4	Uncharacterized protein (Fragment) OS=Rattus norvegicus PE=3 SV=1 - [F1LWW4_RAT]	2.1057	2.44	5	1	1	1	1.33048e+06	328	34.5548	8.5874
D3ZX01	Protein Rps4y2 OS=Rattus norvegicus GN=Rps4y2 PE=4 SV=1 - [D3ZX01_RAT]	2.10512	3.44	2	1	1	1	714935	262	29.1798	10.272
D3ZCI3	Protein Arhgap30 OS=Rattus norvegicus GN=Arhgap30 PE=4 SV=1 - [D3ZCI3_RAT]	2.10433	0.91	1	1	1	1	3.71578e+06	1104	120.239	4.80518
D4ABY4	Uncharacterized protein OS=Rattus norvegicus GN=Ube2j1 PE=2 SV=2 - [D4ABY4_RAT]	2.10335	5.2	1	1	1	1	661992	250	27.9782	7.81104
A7XYC1	NADH-ubiquinone oxidoreductase chain 5 OS=Rattus norvegicus GN=Mt-nd5 PE=3 SV=1 - [A7XYC1_RAT]	2.09813	1.81	7	1	1	1	1.6224e+06	609	68.795	9.26123
Q64565	Alanine--glyoxylate aminotransferase 2, mitochondrial OS=Rattus norvegicus GN=Agxt2 PE=1 SV=2 - [AGT2_RAT]	2.0968	3.91	1	1	1	1	100323	512	57.1637	8.07471
Q68FW9	COP9 signalosome complex subunit 3 OS=Rattus norvegicus GN=Cops3 PE=2 SV=1 - [CSN3_RAT]	2.09555	2.6	1	1	1	1	2.06632e+06	423	47.828	6.65381
D3ZNK1	Protein LOC688905 OS=Rattus norvegicus GN=LOC688905 PE=4 SV=2 - [D3ZNK1_RAT]	2.09367	3.22	1	1	1	1		311	34.7072	7.76709
F1M841	Uncharacterized protein (Fragment) OS=Rattus norvegicus GN=LOC678817 PE=4 SV=2 - [F1M841_RAT]	2.0907	1.2	4	1	1	2	3.9531e+07	667	75.4089	8.73389
D3ZP13	Protein Qsox2 OS=Rattus norvegicus GN=Qsox2 PE=4 SV=1 - [D3ZP13_RAT]	2.09061	1.41	1	1	1	1	599911	708	79.1474	8.26514
D3ZAS2	Protein Sgsm1 OS=Rattus norvegicus GN=Sgsm1 PE=4 SV=2 - [D3ZAS2_RAT]	2.0839	0.73	1	1	1	1	836012	1093	123.309	5.64307
D3ZXL0	Protein Slc26a10 OS=Rattus norvegicus GN=Slc26a10 PE=4 SV=2 - [D3ZXL0_RAT]	2.08379	1.17	1	1	1	1	2.75399e+07	684	73.8763	7.97217
Q4V9H5	PHD finger protein 20-like protein 1 OS=Rattus norvegicus GN=Phf20l1 PE=2 SV=2 - [P20L1_RAT]	2.08171	0.99	1	1	1	1	831141	1015	114.013	6.94678
Q4KLI7	Protein Sf3a3 OS=Rattus norvegicus GN=Sf3a3 PE=2 SV=1 - [Q4KLI7_RAT]	2.08149	2.4	1	1	1	1	649281	501	58.8052	5.33838
D3ZLU0	Protein C2cd4c OS=Rattus norvegicus GN=C2cd4c PE=4 SV=1 - [D3ZLU0_RAT]	2.08046	3.32	1	1	1	1	379635	422	44.9371	9.74463
P34067	Proteasome subunit beta type-4 OS=Rattus norvegicus GN=Psmb4 PE=1 SV=2 - [PSB4_RAT]	2.07992	3.8	2	1	1	1	1.90844e+06	263	29.1784	6.91748
Q9QY17-4	Isoform 4 of Protein kinase C and casein kinase substrate in neurons 2 protein OS=Rattus norvegicus GN=Pacsin2 - [PACN2_RAT]	2.07573	2.02	4	1	1	1	397853	445	51.262	5.38916
M0RB18	Protein Vwa8 (Fragment) OS=Rattus norvegicus GN=Vwa8 PE=4 SV=1 - [M0RB18_RAT]	2.06454	2.45	2	1	1	1	333877	408	46.126	7.84033
M0R3K1	GTP-binding protein Rheb OS=Rattus norvegicus GN=Rheb PE=4 SV=1 - [M0R3K1_RAT]	2.05903	6.01	2	1	1	1	939698	183	20.3955	5.92236
D3ZMR7	Protein Tubgcp3 OS=Rattus norvegicus GN=Tubgcp3 PE=4 SV=1 - [D3ZMR7_RAT]	2.05706	2.31	1	1	1	1		606	67.856	8.88037
M0R916	Oxysterol-binding protein-related protein 1 OS=Rattus norvegicus GN=Osbpl1a PE=4 SV=1 - [M0R916_RAT]	2.05635	0.84	2	1	1	1	3.02716e+06	950	107.682	6.65381
Q9JJP9	Ubiquilin-1 OS=Rattus norvegicus GN=Ubqln1 PE=1 SV=1 - [UBQL1_RAT]	2.05427	2.75	1	1	1	2		582	62.0323	4.94482
D4AA63	Protein Ubqln2 OS=Rattus norvegicus GN=Ubqln2 PE=4 SV=1 - [D4AA63_RAT]	2.04675	2.51	1	1	1	1	686963	638	67.2175	5.22412
D3ZTZ2	Synaptotagmin-like 4, isoform CRA_b OS=Rattus norvegicus GN=Sytl4 PE=4 SV=1 - [D3ZTZ2_RAT]	2.0467	2.4	4	1	1	1	751846	501	57.3043	8.89502
D4A786	Protein LOC100360002 OS=Rattus norvegicus GN=LOC100362685 PE=4 SV=1 - [D4A786_RAT]	2.03295	17.24	3	1	1	1	4.75309e+06	58	6.37736	9.83252
Q6AXN8	Protein Zscan21 OS=Rattus norvegicus GN=Zscan21 PE=2 SV=1 - [Q6AXN8_RAT]	2.02878	3.61	1	1	1	1		554	62.9327	7.51807
D3ZGS3	Inositol polyphosphate 5-phosphatase OCRL-1 OS=Rattus norvegicus GN=Ocrl PE=1 SV=1 - [OCRL_RAT]	2.02867	1.22	1	1	1	1	179813	902	104.34	6.55127
Q9QZG1	Solute carrier family 22 member 23 OS=Rattus norvegicus GN=Slc22a23 PE=2 SV=2 - [S22AN_RAT]	2.02809	5.08	1	2	2	2	1.32875e+07	689	74.1591	7.72314
A9UMW0	Protein Ubl5 OS=Rattus norvegicus GN=Ubl5 PE=4 SV=1 - [A9UMW0_RAT]	2.02721	12.33	1	1	1	1	699086	73	8.54143	8.44092
D4A7L4	NADH dehydrogenase (Ubiquinone) 1 beta subcomplex, 11 (Predicted) OS=Rattus norvegicus GN=Ndufb11 PE=4 SV=1 - [D4A7L4_RAT]	2.02165	6.62	1	1	1	1	1.43919e+06	151	17.6229	5.23682
Q5XI29	Cleavage and polyadenylation specificity factor subunit 7 OS=Rattus norvegicus GN=Cpsf7 PE=2 SV=1 - [CPSF7_RAT]	2.02104	2.38	1	1	1	1		462	51.0418	7.78174
A1L1K9	Ring finger and SPRY domain containing 1 OS=Rattus norvegicus GN=Rspry1 PE=2 SV=1 - [A1L1K9_RAT]	2.01327	3.3	2	1	1	1		576	64.334	5.50342
Q4QQW4	Histone deacetylase 1 OS=Rattus norvegicus GN=Hdac1 PE=2 SV=1 - [HDAC1_RAT]	2.01014	2.49	4	1	1	1	692621	482	55.0577	5.47803
G3V6F4	O-linked N-acetylglucosamine (GlcNAc) transferase (UDP-N-acetylglucosamine:polypeptide-N-acetylglucosaminyl transferase), isoform CRA_b OS=Rattus norvegicus GN=Ogt PE=4 SV=2 - [G3V6F4_RAT]	2.00149	0.97	2	1	1	1	223142	1036	115.661	6.65381
B0BN93	26S proteasome non-ATPase regulatory subunit 13 OS=Rattus norvegicus GN=Psmd13 PE=1 SV=1 - [PSD13_RAT]	1.99577	4.52	1	2	2	2	1.21114e+06	376	42.7902	5.8335
B5DFK1	Copa protein OS=Rattus norvegicus GN=Copa PE=2 SV=1 - [B5DFK1_RAT]	1.99146	0.98	2	1	1	1	389711	1224	138.273	7.57666
F1LZ51	Protein RGD1565653 (Fragment) OS=Rattus norvegicus GN=RGD1565653 PE=4 SV=1 - [F1LZ51_RAT]	1.9857	5.93	5	1	1	1	352786	118	13.0937	6.55127
F1LVM4	Protein Ap3s2 (Fragment) OS=Rattus norvegicus GN=Ap3s2 PE=4 SV=2 - [F1LVM4_RAT]	1.98542	6.47	2	1	1	1	614580	170	19.1748	4.729
Q69BT7	Trafficking protein particle complex subunit 4 OS=Rattus norvegicus GN=Trappc4 PE=2 SV=1 - [TPPC4_RAT]	1.97976	4.11	1	1	1	1		219	24.3435	6.21436
Q63692	Hsp90 co-chaperone Cdc37 OS=Rattus norvegicus GN=Cdc37 PE=1 SV=2 - [CDC37_RAT]	1.97898	4.49	1	1	1	1		379	44.4819	5.33838
Q5M7T9	Threonine synthase-like 2 OS=Rattus norvegicus GN=Thnsl2 PE=2 SV=1 - [THNS2_RAT]	1.97702	1.86	1	1	1	1	1.02701e+06	485	54.1023	6.60986
P28572-1	Isoform 2 of Sodium- and chloride-dependent glycine transporter 1 OS=Rattus norvegicus GN=Slc6a9 - [SC6A9_RAT]	1.97581	1.11	2	1	1	1	1.06124e+06	633	70.5239	7.91357
A0A5D0	Cd200 molecule OS=Rattus norvegicus GN=Cd200 PE=2 SV=1 - [A0A5D0_RAT]	1.97239	4.32	2	1	1	1	659053	278	31.0961	8.80713
F1LWZ0	Protein Olr69 (Fragment) OS=Rattus norvegicus GN=Olr69 PE=3 SV=1 - [F1LWZ0_RAT]	1.97007	2.65	1	1	1	1	2.62955e+06	302	33.744	8.77783
Q68FR4	Zmiz2 protein (Fragment) OS=Rattus norvegicus GN=Zmiz2 PE=2 SV=1 - [Q68FR4_RAT]	1.96651	2.18	2	1	1	1	196353	412	44.1541	6.1001
Q03114	Cyclin-dependent kinase 5 OS=Rattus norvegicus GN=Cdk5 PE=1 SV=1 - [CDK5_RAT]	1.96106	5.48	7	1	2	3	1.19189e+06	292	33.2332	7.66455
Q3KRF2	High density lipoprotein binding protein OS=Rattus norvegicus GN=Hdlbp PE=2 SV=1 - [Q3KRF2_RAT]	1.96059	0.55	1	1	1	1	1.27161e+06	1268	141.608	6.94678
Q5U355	Itfg1 protein OS=Rattus norvegicus GN=Itfg1 PE=2 SV=1 - [Q5U355_RAT]	1.95842	1.31	2	1	1	1	1.60212e+06	610	67.3292	5.66846
Q5I0K4	Mrps9 protein (Fragment) OS=Rattus norvegicus GN=Mrps9 PE=2 SV=1 - [Q5I0K4_RAT]	1.95244	3.25	2	1	1	1	237816	338	39.3671	8.646
Q4V8J4	Glycerol-3-phosphate acyltransferase 3 OS=Rattus norvegicus GN=Agpat9 PE=2 SV=1 - [GPAT3_RAT]	1.94804	1.97	1	1	1	2	2.43574e+06	457	50.9787	8.55811
Q68FS8	Protein Rtcd1 OS=Rattus norvegicus GN=Rtcd1 PE=2 SV=1 - [Q68FS8_RAT]	1.94721	2.73	1	1	1	1	1.03103e+06	366	39.2883	7.66455
M0R8T2	Uncharacterized protein OS=Rattus norvegicus PE=4 SV=1 - [M0R8T2_RAT]	1.94108	1.33	2	1	1	1	565278	902	98.4831	5.5415
D3ZC63	Protein Cmpk2 OS=Rattus norvegicus GN=Cmpk2 PE=4 SV=2 - [D3ZC63_RAT]	1.94056	5.04	2	1	2	2	474183	417	46.7351	6.34131
Q6P7Q4	Lactoylglutathione lyase OS=Rattus norvegicus GN=Glo1 PE=1 SV=3 - [LGUL_RAT]	1.93621	4.89	1	1	1	1	418128	184	20.8063	5.31299
Q6P9U0	Protein Serpinb6 OS=Rattus norvegicus GN=Serpinb6 PE=2 SV=1 - [Q6P9U0_RAT]	1.93426	2.37	1	1	1	1	1.55614e+06	379	42.9909	6.1001
B5DFJ4	Protein Vps18 OS=Rattus norvegicus GN=Vps18 PE=2 SV=1 - [B5DFJ4_RAT]	1.92937	1.54	1	1	1	1	573131	973	110.116	6.07471
Q5U204	Ragulator complex protein LAMTOR3 OS=Rattus norvegicus GN=Lamtor3 PE=2 SV=1 - [LTOR3_RAT]	1.92863	8.87	1	1	1	1	1.67069e+06	124	13.5713	7.34229
B5DEY8	Protein Snx6 OS=Rattus norvegicus GN=Snx6 PE=2 SV=1 - [B5DEY8_RAT]	1.92426	2.46	1	1	1	1	1.42765e+06	406	46.6077	6.16357
G3V6W1	Glutamate receptor 4 OS=Rattus norvegicus GN=Gria4 PE=4 SV=2 - [G3V6W1_RAT]	1.92254	3.21	4	1	1	1		529	58.4669	8.06006
O35162	Heat shock 70 kDa protein 13 OS=Rattus norvegicus GN=Hspa13 PE=2 SV=2 - [HSP13_RAT]	1.92225	2.12	1	1	1	1	513186	471	51.7631	5.63037
Q6AXS4	Renin receptor OS=Rattus norvegicus GN=Atp6ap2 PE=2 SV=1 - [RENR_RAT]	1.91919	4	1	1	1	1	145210	350	39.0573	5.5415
D3ZL37	Uncharacterized protein OS=Rattus norvegicus PE=4 SV=2 - [D3ZL37_RAT]	1.91603	2.72	1	1	1	1	1.50018e+06	257	28.7243	8.5874
D3ZNZ8	40S ribosomal protein S27 OS=Rattus norvegicus GN=Rps27l2 PE=3 SV=1 - [D3ZNZ8_RAT]	1.90717	9.52	4	1	1	1	2.50822e+06	84	9.46383	9.27588
Q5U367	Procollagen-lysine,2-oxoglutarate 5-dioxygenase 3 OS=Rattus norvegicus GN=Plod3 PE=2 SV=1 - [PLOD3_RAT]	1.90656	1.35	1	1	1	1		741	85.0067	6.23975
D4A3E8	Mitochondrial ribosomal protein S27 (Predicted), isoform CRA_b OS=Rattus norvegicus GN=Mrps27 PE=4 SV=1 - [D4A3E8_RAT]	1.90621	2.89	1	1	1	1	123511	415	47.618	5.32568
D3ZD09	Cytochrome c oxidase subunit 6B1 OS=Rattus norvegicus GN=LOC681754 PE=4 SV=1 - [D3ZD09_RAT]	1.90487	12.79	1	1	1	1	410589	86	10.0649	8.71924
Q5U2Q7	Eukaryotic peptide chain release factor subunit 1 OS=Rattus norvegicus GN=Etf1 PE=2 SV=3 - [ERF1_RAT]	1.90127	3.43	1	1	1	1	2.76221e+06	437	49.0002	5.70654
B5DFL0	Protein Snta1 OS=Rattus norvegicus GN=Snta1 PE=2 SV=1 - [B5DFL0_RAT]	1.89801	2	1	1	1	1	342883	499	53.3295	6.80029
M0RAG4	Protein LOC100361098 (Fragment) OS=Rattus norvegicus GN=LOC100361098 PE=4 SV=1 - [M0RAG4_RAT]	1.8955	11.19	1	1	1	1		143	16.8537	9.49561
B1WC29	Ankrd49 protein OS=Rattus norvegicus GN=Ankrd49 PE=2 SV=1 - [B1WC29_RAT]	1.89469	5.02	1	1	1	1		239	27.1885	4.88135
Q6MGC4	H2-K region expressed gene 2, rat orthologue OS=Rattus norvegicus GN=Pfdn6 PE=4 SV=1 - [Q6MGC4_RAT]	1.89119	6.3	1	1	1	1	777133	127	14.4888	8.88037
P62193	26S protease regulatory subunit 4 OS=Rattus norvegicus GN=Psmc1 PE=2 SV=1 - [PRS4_RAT]	1.89082	4.09	1	2	2	3	717020	440	49.1537	6.21436
P38659	Protein disulfide-isomerase A4 OS=Rattus norvegicus GN=Pdia4 PE=1 SV=2 - [PDIA4_RAT]	1.89008	4.82	2	2	2	3	725569	643	72.6747	5.12256
F1LXD9	Uncharacterized protein (Fragment) OS=Rattus norvegicus PE=2 SV=2 - [F1LXD9_RAT]	1.89002	0.61	1	1	1	1		1640	192.392	5.60498
M0RAX4	Guanine nucleotide-binding protein subunit beta-5 OS=Rattus norvegicus GN=Gnb5 PE=4 SV=1 - [M0RAX4_RAT]	1.88394	5.88	3	1	1	1	442606	187	20.6241	8.29443
Q6P747	Heterochromatin protein 1-binding protein 3 OS=Rattus norvegicus GN=Hp1bp3 PE=2 SV=1 - [HP1B3_RAT]	1.88267	1.63	1	1	1	1	410379	553	60.7692	9.67139
Q6AYP4	Zinc finger C2HC domain-containing protein 1C OS=Rattus norvegicus GN=Zc2hc1c PE=2 SV=1 - [ZC21C_RAT]	1.8782	1.9	1	1	1	1		525	59.413	9.64209
D4A9H6	Protein St5 OS=Rattus norvegicus GN=St5 PE=4 SV=1 - [D4A9H6_RAT]	1.87678	0.64	1	1	1	1	4.14013e+06	1100	122.906	9.30518
M0R735	Uncharacterized protein (Fragment) OS=Rattus norvegicus PE=4 SV=1 - [M0R735_RAT]	1.8758	7.69	6	1	1	2	265591	156	16.9545	5.10986
Q5U2R0	Methionine adenosyltransferase 2 subunit beta OS=Rattus norvegicus GN=Mat2b PE=2 SV=1 - [MAT2B_RAT]	1.87401	3.89	1	1	1	1	918186	334	37.351	6.94678
G3V709	Nicotinate phosphoribosyltransferase OS=Rattus norvegicus GN=Naprt1 PE=4 SV=1 - [G3V709_RAT]	1.8711	1.67	2	1	1	1	3.89917e+07	538	58.5667	6.354
Q68FU7	Ubiquinone biosynthesis monooxygenase COQ6 OS=Rattus norvegicus GN=Coq6 PE=2 SV=1 - [COQ6_RAT]	1.87069	1.68	1	1	1	1		476	51.4631	7.21045
Q5U4E5	Beta-transducin repeat containing OS=Rattus norvegicus GN=Btrc PE=2 SV=1 - [Q5U4E5_RAT]	1.86429	2.37	2	1	1	1		506	58.0863	8.03076
G3V6R5	Sulfite oxidase OS=Rattus norvegicus GN=Suox PE=4 SV=1 - [G3V6R5_RAT]	1.86289	1.47	2	1	1	1	286724	546	60.7678	6.80029
Q9Z1W6-4	Isoform 4 of Protein LYRIC OS=Rattus norvegicus GN=Mtdh - [LYRIC_RAT]	1.85251	2.1	5	1	1	1	181782	525	57.886	9.49561
P60522	Gamma-aminobutyric acid receptor-associated protein-like 2 OS=Rattus norvegicus GN=Gabarapl2 PE=3 SV=1 - [GBRL2_RAT]	1.85174	9.4	1	1	1	2	906867	117	13.6581	8.104
Q08602	Geranylgeranyl transferase type-2 subunit alpha OS=Rattus norvegicus GN=Rabggta PE=1 SV=1 - [PGTA_RAT]	1.84457	1.76	1	1	1	1	465466	567	64.8629	5.65576
E9PTY6	Uncharacterized protein (Fragment) OS=Rattus norvegicus GN=Fry PE=2 SV=2 - [E9PTY6_RAT]	1.84336	0.54	3	1	1	1		2990	335.384	6.37939
O54746	Retinoic acid receptor beta2 (Fragment) OS=Rattus norvegicus GN=Rarb PE=2 SV=1 - [O54746_RAT]	1.84001	2.75	4	1	1	1	461865	291	33.0683	8.1333
Q60I06	MHC class I-like located near the LRC, 1 (Fragment) OS=Rattus norvegicus GN=Mill1 PE=2 SV=1 - [Q60I06_RAT]	1.83818	10.34	3	1	1	1		87	10.5943	6.30322
D4ABV0	Protein RGD1566320 OS=Rattus norvegicus GN=RGD1566320 PE=4 SV=1 - [D4ABV0_RAT]	1.83697	10.28	1	1	1	1	174063	107	12.1009	4.97021
P00388	NADPH--cytochrome P450 reductase OS=Rattus norvegicus GN=Por PE=1 SV=3 - [NCPR_RAT]	1.83385	1.33	1	1	1	1	458674	678	76.9142	5.47803
M0R7G9	Potassium voltage-gated channel subfamily C member 4 (Fragment) OS=Rattus norvegicus GN=Kcnc4 PE=4 SV=1 - [M0R7G9_RAT]	1.83123	2.33	2	2	2	2	1.72187e+06	601	65.8631	6.43018
F1LX87	Uncharacterized protein (Fragment) OS=Rattus norvegicus GN=LOC100359720 PE=4 SV=2 - [F1LX87_RAT]	1.82864	1.65	1	1	1	1		729	80.2561	8.86572
D3ZBH0	Protein Creb5 OS=Rattus norvegicus GN=Creb5 PE=4 SV=1 - [D3ZBH0_RAT]	1.82157	1.25	1	1	1	1	6.80677e+06	561	62.8036	9.23193
D3ZFN6	Protein Mettl8 OS=Rattus norvegicus GN=Mettl8 PE=2 SV=2 - [D3ZFN6_RAT]	1.81962	6.53	1	1	1	1	368538	199	23.2355	7.50342
M0RB89	Protein Shcbp1 OS=Rattus norvegicus GN=Shcbp1 PE=4 SV=1 - [M0RB89_RAT]	1.8195	1.65	1	1	1	1		668	75.7433	4.84326
G3V616	Divalent cation tolerant protein CUTA, isoform CRA_b OS=Rattus norvegicus GN=Cuta PE=4 SV=1 - [G3V616_RAT]	1.819	11.3	2	1	2	2		177	18.7459	7.34229
F1LP71	Uncharacterized protein (Fragment) OS=Rattus norvegicus PE=2 SV=2 - [F1LP71_RAT]	1.8181	1.09	3	1	1	1		736	84.2274	6.48096
D3ZWA5	Protein Kifap3 OS=Rattus norvegicus GN=Kifap3 PE=4 SV=2 - [D3ZWA5_RAT]	1.81778	3.02	1	2	2	2	145710	728	84.3482	5.23682
P0C5W1	Microtubule-associated protein 1S OS=Rattus norvegicus GN=Map1s PE=1 SV=1 - [MAP1S_RAT]	1.81048	1.03	1	1	1	1	341552	972	102.742	7.10791
D4A1B8	Protein Dctn3 OS=Rattus norvegicus GN=Dctn3 PE=4 SV=1 - [D4A1B8_RAT]	1.80965	10.75	1	2	2	2	2.32342e+06	186	21.0993	5.70654
D3ZK35	Protein RGD1310081 OS=Rattus norvegicus GN=RGD1310081 PE=4 SV=2 - [D3ZK35_RAT]	1.80734	0.38	1	1	1	1	3.7e+06	2627	294.632	7.25439
P61459	Pterin-4-alpha-carbinolamine dehydratase OS=Rattus norvegicus GN=Pcbd1 PE=1 SV=2 - [PHS_RAT]	1.8031	7.69	1	1	1	1	3.58785e+06	104	11.992	6.80029
B5DFI9	Pdk3 protein OS=Rattus norvegicus GN=Pdk3 PE=2 SV=1 - [B5DFI9_RAT]	1.80199	1.69	1	1	1	1	798448	415	47.9136	8.80713
D3ZP77	Uncharacterized protein (Fragment) OS=Rattus norvegicus PE=4 SV=2 - [D3ZP77_RAT]	1.80097	3.13	3	1	1	1	286120	288	32.9875	5.08447
D3ZJD3	Protein RGD1565183 OS=Rattus norvegicus GN=LOC100362069 PE=4 SV=1 - [D3ZJD3_RAT]	1.80011	8.03	3	1	1	2	210861	137	15.5555	11.9272
D3ZAX1	Protein RGD1564836 OS=Rattus norvegicus GN=RGD1564836 PE=4 SV=1 - [D3ZAX1_RAT]	1.79953	9.89	3	1	1	1		91	10.1963	9.43701
F1M9C1	Prolyl 3-hydroxylase 2 (Fragment) OS=Rattus norvegicus GN=Leprel1 PE=2 SV=2 - [F1M9C1_RAT]	1.79882	1.28	2	1	1	1	9.5096e+06	547	62.2983	5.13525
D3ZL83	Protein Fhdc1 OS=Rattus norvegicus GN=Fhdc1 PE=2 SV=2 - [D3ZL83_RAT]	1.79789	1.48	1	1	1	1	335330	1148	125.494	9.12939
D3ZQH6	Protein Pla2g4d OS=Rattus norvegicus GN=Pla2g4d PE=4 SV=1 - [D3ZQH6_RAT]	1.79641	0.97	1	1	1	1	872892	825	92.8647	5.2749
M0RA68	Uncharacterized protein OS=Rattus norvegicus PE=4 SV=1 - [M0RA68_RAT]	1.79634	0.63	2	1	1	1	5.05792e+06	1738	196.314	6.0874
P59649	FXYD domain-containing ion transport regulator 7 OS=Rattus norvegicus GN=Fxyd7 PE=1 SV=1 - [FXYD7_RAT]	1.79606	16.25	1	1	1	1	696124	80	8.48124	7.84033
D3ZHY6	Protein Ddx54 OS=Rattus norvegicus GN=Ddx54 PE=3 SV=2 - [D3ZHY6_RAT]	1.79403	0.57	2	1	1	5	2.7921e+06	874	97.8734	10.0229
Q5NDF0	Glycosyltransferase-like domain-containing protein 2 OS=Rattus norvegicus GN=Gtdc2 PE=2 SV=1 - [GTDC2_RAT]	1.78933	1.72	1	1	1	2	1.00004e+06	580	66.6745	8.48486
Q9Z142	Transmembrane protein 33 OS=Rattus norvegicus GN=Tmem33 PE=2 SV=1 - [TMM33_RAT]	1.7882	4.05	1	1	1	1	828198	247	27.9648	9.65674
P97838-2	Isoform 2 of Disks large-associated protein 3 OS=Rattus norvegicus GN=Dlgap3 - [DLGP3_RAT]	1.78511	1.76	3	1	1	1		966	104.724	8.80713
P15087	Carboxypeptidase E OS=Rattus norvegicus GN=Cpe PE=1 SV=1 - [CBPE_RAT]	1.78495	4.2	3	2	2	2	1.79863e+06	476	53.2754	5.18604
F1LRI5	Protein Gcn1l1 OS=Rattus norvegicus GN=Gcn1l1 PE=2 SV=2 - [F1LRI5_RAT]	1.77889	0.41	1	1	1	1	189859	2669	292.475	7.29834
Q5HZY3	Protein Uchl5 OS=Rattus norvegicus GN=Uchl5 PE=2 SV=1 - [Q5HZY3_RAT]	1.77695	3.4	1	1	1	1		324	37.0737	5.22412
G3V6H1	Galactosylceramidase OS=Rattus norvegicus GN=Galc PE=2 SV=2 - [G3V6H1_RAT]	1.77023	1.2	1	1	1	1	468163	668	75.2285	6.0874
D3ZVI7	Protein Sass6 OS=Rattus norvegicus GN=Sass6 PE=2 SV=2 - [D3ZVI7_RAT]	1.76786	1.76	1	1	1	1		568	64.9091	6.91748
P52481	Adenylyl cyclase-associated protein 2 OS=Rattus norvegicus GN=Cap2 PE=2 SV=1 - [CAP2_RAT]	1.76732	3.98	1	1	2	3	2.40243e+06	477	52.8791	7.1665
Q9ES71	Dihydroxyacetone phosphate acyltransferase OS=Rattus norvegicus GN=Gnpat PE=2 SV=1 - [GNPAT_RAT]	1.76315	1.47	1	1	1	1		678	77.0261	7.72314
D4A7Z6	Protein Tecta OS=Rattus norvegicus GN=Tecta PE=4 SV=1 - [D4A7Z6_RAT]	1.76247	0.46	1	1	1	1	3.02716e+06	2155	239.298	5.35107
Q5RK30	Ribosome maturation protein SBDS OS=Rattus norvegicus GN=Sbds PE=2 SV=1 - [SBDS_RAT]	1.75576	3.6	1	1	1	1	755587	250	28.7343	8.74854
D3Z8F9	Protein Ankrd11 OS=Rattus norvegicus GN=Ankrd11 PE=2 SV=2 - [D3Z8F9_RAT]	1.75349	0.46	2	1	1	1		2595	290.963	6.88818
P27682	Neuroendocrine protein 7B2 OS=Rattus norvegicus GN=Scg5 PE=1 SV=1 - [7B2_RAT]	1.75277	3.81	1	1	1	1		210	23.6688	5.80811
Q9ESH6	Glutaredoxin-1 OS=Rattus norvegicus GN=Glrx PE=3 SV=3 - [GLRX1_RAT]	1.74781	10.28	1	1	1	1	1.3195e+06	107	11.8712	8.6167
D3ZSE6	Uncharacterized protein OS=Rattus norvegicus PE=4 SV=2 - [D3ZSE6_RAT]	1.74751	5.97	1	1	1	1		352	39.7085	8.96826
F1M6Q3	Protein Col4a2 OS=Rattus norvegicus GN=Col4a2 PE=4 SV=2 - [F1M6Q3_RAT]	1.7456	1.3	1	2	2	2	798327	1690	166.145	8.646
B1H258	LOC688276 protein OS=Rattus norvegicus GN=LOC688276 PE=2 SV=1 - [B1H258_RAT]	1.74022	0.97	2	1	1	1	3.48719e+06	723	82.063	8.96826
P19132	Ferritin heavy chain OS=Rattus norvegicus GN=Fth1 PE=1 SV=3 - [FRIH_RAT]	1.73772	3.85	7	1	1	2	1.51494e+06	182	21.1133	6.30322
B2RYN3	Eukaryotic translation elongation factor 1 epsilon 1 OS=Rattus norvegicus GN=Eef1e1 PE=2 SV=1 - [B2RYN3_RAT]	1.73665	5.17	1	1	1	1	1.24351e+06	174	19.8304	8.1626
B1WBR1	Golgi reassembly-stacking protein 1 OS=Rattus norvegicus GN=Gorasp1 PE=2 SV=1 - [B1WBR1_RAT]	1.73294	2.24	2	1	1	1	2.54852e+06	446	47.0227	4.60205
Q99MH9	Bardet-Biedl syndrome 2 protein homolog OS=Rattus norvegicus GN=Bbs2 PE=2 SV=1 - [BBS2_RAT]	1.73073	1.39	1	1	1	1	1.10179e+06	721	79.8674	6.07471
F1M440	Protein Ccdc108 (Fragment) OS=Rattus norvegicus GN=Ccdc108 PE=4 SV=1 - [F1M440_RAT]	1.72968	0.92	1	1	1	1		1845	208.43	6.31592
D3Z830	Protein Moxd2 OS=Rattus norvegicus GN=Moxd2 PE=4 SV=1 - [D3Z830_RAT]	1.729	1.29	1	1	1	2	2.41379e+06	619	69.7556	4.91943
D3ZKG0	Uncharacterized protein (Fragment) OS=Rattus norvegicus GN=Mll4 PE=4 SV=2 - [D3ZKG0_RAT]	1.72743	0.48	1	1	1	1	2.43159e+06	2703	293.597	8.29443
Q6AXR6	Glutathione S-transferase omega 1 OS=Rattus norvegicus GN=Gsto1 PE=2 SV=1 - [Q6AXR6_RAT]	1.72734	5.81	2	1	1	1	767714	241	27.665	7.00537
P20760	Ig gamma-2A chain C region OS=Rattus norvegicus GN=Igg-2a PE=1 SV=1 - [IGG2A_RAT]	1.72707	3.11	11	1	1	1	848941	322	35.1634	7.6792
Q568Z9	Phytanoyl-CoA hydroxylase-interacting protein OS=Rattus norvegicus GN=Phyhip PE=2 SV=1 - [PHYIP_RAT]	1.72666	3.64	1	1	1	1	353515	330	37.5305	7.00537
Q4G009	Malignant T-cell-amplified sequence 1 OS=Rattus norvegicus GN=Mcts1 PE=2 SV=1 - [MCTS1_RAT]	1.72133	4.95	1	1	1	1	1.98533e+06	182	20.5368	8.82178
D3ZVK0	Protein RGD1563842 OS=Rattus norvegicus GN=RGD1563842 PE=4 SV=2 - [D3ZVK0_RAT]	1.72096	1.96	1	1	1	1	432594	358	40.1501	5.50342
F1LSW9	Ubiquitin carboxyl-terminal hydrolase (Fragment) OS=Rattus norvegicus GN=LOC100912059 PE=2 SV=2 - [F1LSW9_RAT]	1.71693	2.19	3	1	1	1	1.0341e+07	365	42.252	6.59521
D3Z9R8	6.8 kDa mitochondrial proteolipid OS=Rattus norvegicus GN=Mp68 PE=1 SV=1 - [68MP_RAT]	1.71345	11.67	1	1	1	1		60	6.90965	9.92041
M0RD40	Protein LOC684112 OS=Rattus norvegicus GN=LOC684112 PE=4 SV=1 - [M0RD40_RAT]	1.71005	0.73	1	1	1	1		1366	150.569	7.00537
Q5M9G9	Protein TBRG4 OS=Rattus norvegicus GN=Tbrg4 PE=2 SV=1 - [TBRG4_RAT]	1.709	1.27	1	1	1	1	206808	629	71.1357	8.36768
D4A5F2	Protein Cep290 OS=Rattus norvegicus GN=Cep290 PE=2 SV=2 - [D4A5F2_RAT]	1.70861	0.32	1	1	1	1	1.22994e+06	2478	289.376	6.20166
D3ZMJ4	Protein Ankrd13c OS=Rattus norvegicus GN=Ankrd13c PE=4 SV=2 - [D3ZMJ4_RAT]	1.7085	1.08	1	1	1	1	2.15622e+06	555	61.7387	7.40088
D3ZMM2	Uncharacterized protein OS=Rattus norvegicus GN=Wdr90 PE=4 SV=2 - [D3ZMM2_RAT]	1.70702	0.9	1	2	2	2	3.36527e+06	1891	204.797	6.771
G3V834	Protein PRRC1 OS=Rattus norvegicus GN=Prrc1 PE=4 SV=1 - [G3V834_RAT]	1.70609	3.39	2	1	1	1		443	46.2496	6.07471
F2Z3R8	Protein Pcdhb15 OS=Rattus norvegicus GN=Pcdhb15 PE=3 SV=1 - [F2Z3R8_RAT]	1.70584	1.53	1	1	1	1		786	86.2298	4.80518
B0BN85	Suppressor of G2 allele of SKP1 homolog OS=Rattus norvegicus GN=Sugt1 PE=2 SV=1 - [SUGT1_RAT]	1.70355	2.08	1	1	1	1	124354	336	38.0669	5.2876
Q4V8G6	Methyltransferase-like 3 OS=Rattus norvegicus GN=Mettl3 PE=2 SV=1 - [Q4V8G6_RAT]	1.70197	1.9	1	1	1	1	211792	580	64.6447	6.53662
D3ZCD4	Phosphatidylinositol transfer protein beta isoform (Fragment) OS=Rattus norvegicus GN=Pitpnb PE=2 SV=2 - [D3ZCD4_RAT]	1.69825	4.8	3	1	1	1		271	31.4148	6.25244
Q4V8G4	WD repeat-containing protein 78 OS=Rattus norvegicus GN=Wdr78 PE=2 SV=1 - [WDR78_RAT]	1.69607	1	1	1	1	1	928225	803	90.1408	5.43994
G3V9E5	Steroid sulfatase OS=Rattus norvegicus GN=Sts PE=4 SV=1 - [G3V9E5_RAT]	1.69028	1.21	2	1	1	2	4291277	577	62.7213	7.40088
P50503	Hsc70-interacting protein OS=Rattus norvegicus GN=St13 PE=1 SV=1 - [F10A1_RAT]	1.68923	2.72	1	1	1	1	909549	368	41.2534	5.38916
D3ZZP8	Protein Cul9 OS=Rattus norvegicus GN=Cul9 PE=3 SV=2 - [D3ZZP8_RAT]	1.68863	0.36	1	1	1	1		2514	280.517	5.50342
B2GUY0	Endoplasmic reticulum mannosyl-oligosaccharide 1,2-alpha-mannosidase OS=Rattus norvegicus GN=Man1b1 PE=2 SV=2 - [MA1B1_RAT]	1.68808	1.52	1	1	1	1	609952	657	74.8475	8.22119
G3V997	Neuronal migration protein doublecortin OS=Rattus norvegicus GN=Dcx PE=4 SV=1 - [G3V997_RAT]	1.68777	3.56	1	1	1	1	637867	365	40.5183	9.27588
D4A2I6	Protein Tmem220 OS=Rattus norvegicus GN=Tmem220 PE=4 SV=1 - [D4A2I6_RAT]	1.68764	5.99	2	1	1	1	413628	167	18.3184	7.81104
D3ZJA1	Protein RGD1305938 OS=Rattus norvegicus GN=RGD1305938 PE=2 SV=2 - [D3ZJA1_RAT]	1.68732	5.04	1	1	1	1		258	29.675	4.84326
Q5XIW8	U4/U6.U5 tri-snRNP-associated protein 1 OS=Rattus norvegicus GN=Sart1 PE=2 SV=1 - [SNUT1_RAT]	1.68512	1.74	1	1	1	1	3.92664e+06	806	90.9555	5.77002
P13286	Phosphorylase b kinase gamma catalytic chain, skeletal muscle/heart isoform OS=Rattus norvegicus GN=Phkg1 PE=2 SV=2 - [PHKG1_RAT]	1.68225	2.84	1	1	1	1	2.16813e+06	388	44.9859	6.55127
P22734-2	Isoform 2 of Catechol O-methyltransferase OS=Rattus norvegicus GN=Comt - [COMT_RAT]	1.68091	5.43	2	1	1	1	488385	221	24.7314	5.30029
Q7TQ82	28S ribosomal protein S10, mitochondrial OS=Rattus norvegicus GN=Mrps10 PE=2 SV=1 - [RT10_RAT]	1.68066	4.52	1	1	1	1		155	17.9484	8.646
F1M7H6	Protein Ccdc150 OS=Rattus norvegicus GN=Ccdc150 PE=4 SV=2 - [F1M7H6_RAT]	1.67894	0.73	1	1	1	1	2.53808e+06	1102	128.215	7.13721
D4AE41	RNA binding motif protein, X-linked-like-1 OS=Rattus norvegicus GN=Rbmxl1 PE=3 SV=1 - [RMXL1_RAT]	1.67838	2.84	3	1	1	1	633898	388	42.2243	9.83252
F1LM28	Neurofibromin (Fragment) OS=Rattus norvegicus GN=Nf1 PE=2 SV=2 - [F1LM28_RAT]	1.67334	0.46	2	1	1	1		2808	315.49	7.26904
D4ACC1	Dual adaptor for phosphotyrosine and 3-phosphoinositides 1 (Predicted) OS=Rattus norvegicus GN=Dapp1 PE=4 SV=1 - [D4ACC1_RAT]	1.67294	2.15	1	1	1	1		279	32.0912	8.1333
B1WC30	Pbx1 protein OS=Rattus norvegicus GN=Pbx1 PE=2 SV=1 - [B1WC30_RAT]	1.67019	1.73	2	1	1	2	2.51847e+06	347	38.4031	8.39697
Q6AYK3	Inositol-3-phosphate synthase 1 OS=Rattus norvegicus GN=Isyna1 PE=3 SV=2 - [INO1_RAT]	1.66894	2.15	1	1	1	1		557	60.8451	6.03662
Q9QXY2-2	Isoform 2 of SRC kinase signaling inhibitor 1 OS=Rattus norvegicus GN=Srcin1 - [SRCN1_RAT]	1.66336	0.68	2	1	1	1	1.07494e+06	1173	126.977	9.36377
D3ZIT3	Uncharacterized protein (Fragment) OS=Rattus norvegicus PE=2 SV=2 - [D3ZIT3_RAT]	1.66139	0.5	2	1	1	1		1794	207.648	4.97021
G3V8S5	Breast cancer type 1 susceptibility protein homolog OS=Rattus norvegicus GN=Brca1 PE=4 SV=1 - [G3V8S5_RAT]	1.66101	0.39	2	1	1	1	3.43788e+06	1817	199.965	5.80811
M0RD20	Calpain small subunit 1 OS=Rattus norvegicus GN=Capns1 PE=4 SV=1 - [M0RD20_RAT]	1.65586	7	2	2	2	3	2.85616e+06	243	25.4304	5.42725
O70425	Myogenin OS=Rattus norvegicus GN=Myog PE=2 SV=1 - [O70425_RAT]	1.65207	4.02	2	1	1	1	25469070	224	25.1275	6.01123
F1LS62	Protein Kdm4c (Fragment) OS=Rattus norvegicus GN=Kdm4c PE=2 SV=2 - [F1LS62_RAT]	1.65088	0.7	1	1	1	1	4.64097e+06	1003	114.294	6.91748
O70260	E3 SUMO-protein ligase PIAS3 OS=Rattus norvegicus GN=Pias3 PE=1 SV=2 - [PIAS3_RAT]	1.64797	1.91	1	1	1	1		628	68.32	7.84033
F1M7A0	DNA topoisomerase 2 (Fragment) OS=Rattus norvegicus GN=Top2a PE=2 SV=2 - [F1M7A0_RAT]	1.64678	0.59	2	1	1	1	712652	1525	172.735	8.82178
F1LRB7	Tumor susceptibility gene 101 protein OS=Rattus norvegicus GN=Tsg101 PE=2 SV=2 - [F1LRB7_RAT]	1.64473	2.72	2	1	1	2	464806	368	41.7706	7.04932
P38718-2	Isoform Short of Mitochondrial pyruvate carrier 2 OS=Rattus norvegicus GN=Mpc2 - [MPC2_RAT]	1.64445	6.03	2	1	1	1		116	12.9599	10.77
D3ZS26	Uncharacterized protein OS=Rattus norvegicus PE=4 SV=2 - [D3ZS26_RAT]	1.64298	3	1	1	1	1		300	34.8901	8.80713
B5DFB4	Tetratricopeptide repeat domain 7B OS=Rattus norvegicus GN=Ttc7b PE=2 SV=1 - [B5DFB4_RAT]	1.63996	1.37	2	1	1	1	942050	585	64.8554	6.49365
D3ZX82	Cytoplasmic FMR1 interacting protein 2 (Predicted) OS=Rattus norvegicus GN=Cyfip2 PE=2 SV=2 - [D3ZX82_RAT]	1.63904	1.35	1	1	1	2		593	68.6343	8.38232
Q4QQR8	Protein Vstm4 OS=Rattus norvegicus GN=Vstm4 PE=2 SV=1 - [Q4QQR8_RAT]	1.63749	2.51	1	1	1	1	1.10636e+06	319	36.0075	9.81787
F1LMA4	Beta-adrenergic receptor kinase 1 (Fragment) OS=Rattus norvegicus GN=Adrbk1 PE=2 SV=2 - [F1LMA4_RAT]	1.63502	1.53	3	1	1	1	418413	652	75.6604	7.29834
Q5BJU9	Acin1 protein (Fragment) OS=Rattus norvegicus GN=Acin1 PE=2 SV=1 - [Q5BJU9_RAT]	1.63304	1.36	1	1	1	2	8.35795e+06	515	59.8059	9.51025
M0R4R1	Protein LOC685718 OS=Rattus norvegicus GN=LOC685718 PE=4 SV=1 - [M0R4R1_RAT]	1.6325	4.65	3	1	1	1		172	19.6737	4.83057
Q99PU6	Branched-chain alpha-keto acid dihydrolipoyl acyltransferase (Fragment) OS=Rattus norvegicus GN=Dbt PE=2 SV=1 - [Q99PU6_RAT]	1.62927	4.84	2	1	1	1	614249	186	20.7678	5.33838
D4A5X7	Ganglioside-induced differentiation-associated-protein 1 (Predicted) OS=Rattus norvegicus GN=Gdap1 PE=4 SV=1 - [D4A5X7_RAT]	1.62813	3.07	1	1	1	1	413679	358	41.1906	8.71924
P57113	Maleylacetoacetate isomerase OS=Rattus norvegicus GN=Gstz1 PE=1 SV=2 - [MAAI_RAT]	1.62715	5.09	1	1	1	1	2.47475e+06	216	23.9456	7.76709
Q9Z118	Polypyrimidine tract-binding protein 3 OS=Rattus norvegicus GN=Ptbp3 PE=2 SV=1 - [PTBP3_RAT]	1.62286	1.72	1	1	1	1		523	56.6803	9.12939
Q63364	E3 ubiquitin-protein ligase Praja-2 OS=Rattus norvegicus GN=Pja2 PE=2 SV=1 - [PJA2_RAT]	1.62228	2.26	1	1	1	1		707	77.8728	4.44971
D4AAP6	Protein Mn1 OS=Rattus norvegicus GN=Mn1 PE=4 SV=1 - [D4AAP6_RAT]	1.61731	0.69	1	1	1	1	1.80468e+06	1304	134.779	6.7417
F7ESZ5	Uncharacterized protein OS=Rattus norvegicus GN=LOC317588 PE=4 SV=1 - [F7ESZ5_RAT]	1.61668	0.63	2	1	1	1	2.60327e+07	946	110.564	8.646
Q6AYK5	Cell growth-regulating nucleolar protein OS=Rattus norvegicus GN=Lyar PE=2 SV=1 - [LYAR_RAT]	1.61363	1.81	1	1	1	1	820523	386	43.6535	9.36377
Q6NX65	Programmed cell death protein 10 OS=Rattus norvegicus GN=Pdcd10 PE=2 SV=1 - [PDC10_RAT]	1.61232	3.81	1	1	1	1	2.04242e+06	210	24.3397	7.38623
P24062	Insulin-like growth factor 1 receptor OS=Rattus norvegicus GN=Igf1r PE=2 SV=2 - [IGF1R_RAT]	1.61181	0.73	1	1	1	1		1370	155.296	5.78271
Q4AE70-3	Isoform 3 of Histone-arginine methyltransferase CARM1 OS=Rattus norvegicus GN=Carm1 - [CARM1_RAT]	1.6107	1.57	4	1	1	1	556568	573	62.4131	6.62451
P70584	Short/branched chain specific acyl-CoA dehydrogenase, mitochondrial OS=Rattus norvegicus GN=Acadsb PE=1 SV=1 - [ACDSB_RAT]	1.61043	2.31	1	1	1	1	493090	432	47.7933	8.06006
F1LQI5	E3 ubiquitin-protein ligase UBR4 OS=Rattus norvegicus GN=Ubr4 PE=2 SV=1 - [F1LQI5_RAT]	1.60867	0.31	2	1	1	1		5194	573.442	6.04932
D3ZCX6	Protein Rexo1 OS=Rattus norvegicus GN=Rexo1 PE=2 SV=1 - [D3ZCX6_RAT]	1.60493	0.75	1	1	1	2	3.21207e+07	1197	129.178	8.96826
D3ZC04	Protein Esyt3 OS=Rattus norvegicus GN=Esyt3 PE=4 SV=1 - [D3ZC04_RAT]	1.60468	1.91	1	1	1	1	2.19733e+06	891	100.353	8.44092
P0C0A1	Vacuolar protein-sorting-associated protein 25 OS=Rattus norvegicus GN=Vps25 PE=1 SV=1 - [VPS25_RAT]	1.60236	10.23	1	2	2	2	2.17814e+06	176	20.7485	6.34131
Q4G058	Protein Rpo1-3 OS=Rattus norvegicus GN=Rpo1-3 PE=2 SV=1 - [Q4G058_RAT]	1.60179	5.69	1	1	1	2	9.5096e+06	123	14.0571	9.90576
Q9R1S9	Midkine OS=Rattus norvegicus GN=Mdk PE=2 SV=1 - [MK_RAT]	1.60168	7.14	1	1	1	2		140	15.3958	9.70068
Q9EPH1-2	Isoform 2 of Alpha-1B-glycoprotein OS=Rattus norvegicus GN=A1bg - [A1BG_RAT]	1.60142	2.33	2	1	1	1	488343	473	52.4635	6.60986
Q66H39	ATP-binding cassette sub-family F member 3 OS=Rattus norvegicus GN=Abcf3 PE=2 SV=1 - [ABCF3_RAT]	0	0.85	1	1	1	1	983115	709	79.8063	6.46826
Q3KRE0	ATPase family AAA domain-containing protein 3 OS=Rattus norvegicus GN=Atad3 PE=1 SV=1 - [ATAD3_RAT]	0	1.86	1	1	1	1	309402	591	66.7175	9.29053
P29418	ATP synthase subunit epsilon, mitochondrial OS=Rattus norvegicus GN=Atp5e PE=1 SV=2 - [ATP5E_RAT]	0	13.73	2	1	1	1	5.70883e+06	51	5.76311	10.0083
P21571	ATP synthase-coupling factor 6, mitochondrial OS=Rattus norvegicus GN=Atp5j PE=1 SV=1 - [ATP5J_RAT]	0	8.33	1	1	1	1	651842	108	12.4866	9.43701
B2RZ86	Coiled-coil domain-containing protein 89 OS=Rattus norvegicus GN=Ccdc89 PE=2 SV=2 - [CCD89_RAT]	0	1.89	1	1	1	1	527487	370	43.4263	5.92236
Q6MG12	Uncharacterized protein C6orf136 homolog OS=Rattus norvegicus PE=2 SV=1 - [CF136_RAT]	0	5.23	2	1	1	1	1.10782e+06	172	20.4316	8.90967
Q642A4	UPF0598 protein C8orf82 homolog OS=Rattus norvegicus PE=2 SV=1 - [CH082_RAT]	0	5.5	1	1	1	1	205973	218	24.3813	8.5874
Q6AXM9	Uncharacterized protein C12orf29 homolog OS=Rattus norvegicus PE=2 SV=2 - [CL029_RAT]	0	2.46	1	1	1	1		325	37.2809	7.51807
Q5XIR8	Clathrin heavy chain linker domain-containing protein 1 OS=Rattus norvegicus GN=Clhc1 PE=2 SV=1 - [CLHC1_RAT]	0	1.88	1	1	1	1	728402	585	67.4999	8.1333
Q920J3	Coronin-6 OS=Rattus norvegicus GN=Coro6 PE=2 SV=2 - [CORO6_RAT]	0	1.48	1	1	1	1	4.23622e+06	472	52.9148	6.04932
P84850	D-2-hydroxyglutarate dehydrogenase, mitochondrial OS=Rattus norvegicus GN=D2hgdh PE=3 SV=1 - [D2HDH_RAT]	0	1.31	1	1	1	1	1.30524e+06	535	58.7674	8.1333
Q9Z330-8	Isoform 8 of DNA (cytosine-5)-methyltransferase 1 OS=Rattus norvegicus GN=Dnmt1 - [DNMT1_RAT]	0	0.68	13	1	1	1	2.01979e+06	1333	150.385	7.18115
Q641X8	Eukaryotic translation initiation factor 3 subunit E OS=Rattus norvegicus GN=Eif3e PE=2 SV=1 - [EIF3E_RAT]	0	2.25	1	1	1	2	1.66263e+06	445	52.1874	6.03662
P55054	Fatty acid-binding protein 9 OS=Rattus norvegicus GN=Fabp9 PE=2 SV=1 - [FABP9_RAT]	0	9.09	1	1	1	1	254450	132	15.0796	7.73779
P02693	Fatty acid-binding protein, intestinal OS=Rattus norvegicus GN=Fabp2 PE=1 SV=4 - [FABPI_RAT]	0	6.06	1	1	1	1	195193	132	15.1147	7.23975
Q80WE1-2	Isoform 2 of Fragile X mental retardation protein 1 homolog OS=Rattus norvegicus GN=Fmr1 - [FMR1_RAT]	0	1.03	2	1	1	1	2.17605e+06	581	65.5912	7.62061
P35571	Glycerol-3-phosphate dehydrogenase, mitochondrial OS=Rattus norvegicus GN=Gpd2 PE=1 SV=1 - [GPDM_RAT]	0	1.51	1	1	1	1	416275	727	80.9213	6.62451
Q9R1K8	RAS guanyl-releasing protein 1 OS=Rattus norvegicus GN=Rasgrp1 PE=1 SV=1 - [GRP1_RAT]	0	0.75	1	1	1	2		795	90.1868	8.03076
P51111	Huntingtin OS=Rattus norvegicus GN=Htt PE=1 SV=1 - [HD_RAT]	0	0.19	2	1	1	1	534975	3110	343.544	6.32861
D3ZWE7	HORMA domain-containing protein 1 OS=Rattus norvegicus GN=Hormad1 PE=3 SV=1 - [HORM1_RAT]	0	3.83	1	1	1	1		392	44.8566	8.104
F8WLE0	Kinesin-like protein KLP6 OS=Rattus norvegicus GN=Klp6 PE=2 SV=1 - [KLP6_RAT]	0	1.16	1	1	1	1	1.03871e+07	1034	115.469	6.65381
Q91Z80	Liprin-alpha-4 (Fragment) OS=Rattus norvegicus GN=Ppfia4 PE=1 SV=1 - [LIPA4_RAT]	0	0.77	5	1	1	1		1043	117.931	7.00537
D3ZHV2	Microtubule-actin cross-linking factor 1 OS=Rattus norvegicus GN=Macf1 PE=1 SV=1 - [MACF1_RAT]	0	0.2	1	1	1	1	5.52576e+06	5430	619.216	5.40186
Q5RKJ1	Macrophage erythroblast attacher OS=Rattus norvegicus GN=Maea PE=2 SV=2 - [MAEA_RAT]	0	2.27	1	1	1	1	2.16362e+06	396	45.307	8.68994
Q4L1J4	Membrane-associated guanylate kinase, WW and PDZ domain-containing protein 1 OS=Rattus norvegicus GN=Magi1 PE=1 SV=1 - [MAGI1_RAT]	0	0.48	1	1	1	1	1.62771e+06	1255	136.243	5.70654
P43244	Matrin-3 OS=Rattus norvegicus GN=Matr3 PE=1 SV=2 - [MATR3_RAT]	0	1.54	1	1	1	1		845	94.3887	6.20166
Q4QR85	Methylosome protein 50 OS=Rattus norvegicus GN=Wdr77 PE=1 SV=1 - [MEP50_RAT]	0	4.39	3	1	1	1	759428	342	37.0521	5.2749
Q5FVQ8	NLR family member X1 OS=Rattus norvegicus GN=Nlrx1 PE=2 SV=1 - [NLRX1_RAT]	0	0.82	1	1	1	1	672162	973	107.522	7.56201
P55068-2	Isoform 2 of Brevican core protein OS=Rattus norvegicus GN=Bcan - [PGCB_RAT]	0	1.09	3	1	1	1	1.53829e+06	645	69.0423	4.67822
Q9R0I8	Phosphatidylinositol 5-phosphate 4-kinase type-2 alpha OS=Rattus norvegicus GN=Pip4k2a PE=1 SV=1 - [PI42A_RAT]	0	2.71	1	1	1	1	537651	406	46.1805	6.99072
Q63570	26S protease regulatory subunit 6B OS=Rattus norvegicus GN=Psmc4 PE=1 SV=1 - [PRS6B_RAT]	0	2.15	1	1	1	1		418	47.3786	5.21143
P18421	Proteasome subunit beta type-1 OS=Rattus norvegicus GN=Psmb1 PE=1 SV=3 - [PSB1_RAT]	0	5.83	2	1	1	2		240	26.4623	7.35693
P51607	N-acylglucosamine 2-epimerase OS=Rattus norvegicus GN=Renbp PE=2 SV=2 - [RENBP_RAT]	0	1.4	1	1	1	7	4.75022e+07	430	49.5725	5.75732
B0BNE2	DNA-directed RNA polymerases I, II, and III subunit RPABC1 OS=Rattus norvegicus GN=Polr2e PE=2 SV=1 - [RPAB1_RAT]	0	4.29	1	1	1	1		210	24.5547	5.94775
Q62968-2	Isoform 2 of Sodium channel protein type 10 subunit alpha OS=Rattus norvegicus GN=Scn10a - [SCNAA_RAT]	0	0.56	2	1	1	1	788310	1955	219.463	6.26514
P32851	Syntaxin-1A OS=Rattus norvegicus GN=Stx1a PE=1 SV=1 - [STX1A_RAT]	0	3.13	2	1	1	1		288	33.0467	5.23682
Q566R0	Acyl-coenzyme A thioesterase THEM4 OS=Rattus norvegicus GN=Them4 PE=2 SV=1 - [THEM4_RAT]	0	7.83	1	1	1	1	1.65036e+06	230	26.0724	8.92432
Q5I0E7	Transmembrane emp24 domain-containing protein 9 OS=Rattus norvegicus GN=Tmed9 PE=1 SV=1 - [TMED9_RAT]	0	5.53	1	1	1	1	508407	235	27.011	8.26514
Q642A6	von Willebrand factor A domain-containing protein 1 OS=Rattus norvegicus GN=Vwa1 PE=2 SV=1 - [VWA1_RAT]	0	4.34	1	1	1	1		415	44.8043	6.69775
Q498M4	WD repeat-containing protein 5 OS=Rattus norvegicus GN=Wdr5 PE=2 SV=1 - [WDR5_RAT]	0	4.49	1	1	1	1		334	36.5655	8.26514
F1M4A0	Protein Tjp1 OS=Rattus norvegicus GN=Tjp1 PE=4 SV=2 - [F1M4A0_RAT]	0	0.63	1	1	1	1		1733	193.912	6.58057
Q6QI15	LRRGT00193 OS=Rattus norvegicus GN=LOC680227 PE=2 SV=1 - [Q6QI15_RAT]	0	2.78	1	1	1	1		396	43.5574	10.1401
G3V700	Nardilysin OS=Rattus norvegicus GN=Nrd1 PE=3 SV=1 - [G3V700_RAT]	0	0.69	4	1	1	1	2.02455e+06	1161	132.92	4.89404
D3ZXJ5	Protein Eftud1 OS=Rattus norvegicus GN=Eftud1 PE=4 SV=2 - [D3ZXJ5_RAT]	0	0.53	2	1	1	2	4.99849e+06	1127	125.611	5.92236
Q5FVC5	Poliovirus receptor-related 2 OS=Rattus norvegicus GN=Pvrl2 PE=2 SV=1 - [Q5FVC5_RAT]	0	0.94	1	1	1	2	4.51091e+06	530	57.2881	4.85596
D3ZEF9	Protein B3gnt2 OS=Rattus norvegicus GN=B3gnt2 PE=4 SV=1 - [D3ZEF9_RAT]	0	1.51	2	1	1	2	1.95393e+07	397	46.0288	9.15869
F1M9Z9	Protein Adam12 OS=Rattus norvegicus GN=Adam12 PE=4 SV=2 - [F1M9Z9_RAT]	0	0.78	1	1	1	2	1.67882e+06	903	98.5988	8.33838
D4A0I5	DnaJ (Hsp40) homolog, subfamily C, member 6 (Predicted) OS=Rattus norvegicus GN=Dnajc6 PE=4 SV=1 - [D4A0I5_RAT]	0	2.31	1	2	2	3	926360	911	99.2633	7.43018
D3ZAT7	Protein Fam83f OS=Rattus norvegicus GN=Fam83f PE=4 SV=1 - [D3ZAT7_RAT]	0	6.6	1	1	2	2	319424	500	55.5912	8.73389
D3ZWS0	Protein Scrib OS=Rattus norvegicus GN=Scrib PE=4 SV=1 - [D3ZWS0_RAT]	0	0.36	1	1	1	2	907426	1663	179.743	5.17334
F1LPQ8	SECIS binding protein 2, isoform CRA_a OS=Rattus norvegicus GN=Secisbp2 PE=2 SV=2 - [F1LPQ8_RAT]	0	0.83	2	1	1	1	9.58804e+06	846	93.2257	8.27979
D4AEC2	Protein Camsap2 OS=Rattus norvegicus GN=Camsap2 PE=4 SV=1 - [D4AEC2_RAT]	0	0.48	1	1	1	1	2.26988e+06	1470	165.508	7.03467
B2GUX5	5'-nucleotidase, cytosolic III OS=Rattus norvegicus GN=Nt5c3 PE=2 SV=1 - [B2GUX5_RAT]	0	2.36	1	1	1	1		297	33.7883	5.46533
Q3T1K9	Nicolin 1 OS=Rattus norvegicus GN=Nicn1 PE=2 SV=1 - [Q3T1K9_RAT]	0	2.35	22	1	1	1		213	24.3933	7.07861
D3ZTG7	Protein Dgat2l6 OS=Rattus norvegicus GN=Dgat2l6 PE=4 SV=1 - [D3ZTG7_RAT]	0	3.56	1	1	1	1		337	38.4932	9.36377
A3KNA0	Aqr protein OS=Rattus norvegicus GN=Aqr PE=2 SV=1 - [A3KNA0_RAT]	0	1.15	1	1	1	1	2.01409e+06	1484	170.652	6.354
D4A9N1	Protein Hhipl1 OS=Rattus norvegicus GN=Hhipl1 PE=4 SV=1 - [D4A9N1_RAT]	0	1.01	1	1	1	1		791	87.5778	7.98682
D3ZAR2	Microtubule associated serine/threonine kinase 2 (Predicted), isoform CRA_a OS=Rattus norvegicus GN=Mast2 PE=2 SV=2 - [D3ZAR2_RAT]	0	1.21	1	1	1	1		1737	191.077	7.75244
D4A9L7	Lipase OS=Rattus norvegicus GN=Lipk PE=3 SV=2 - [D4A9L7_RAT]	0	1.51	1	1	1	2		397	45.3076	8.51416
Q5EBB1	Interleukin 21 receptor OS=Rattus norvegicus GN=Il21r PE=2 SV=1 - [Q5EBB1_RAT]	0	3.45	1	1	1	1		521	57.402	4.83057
Q6MGC9	PHD finger protein 1 OS=Rattus norvegicus GN=Phf1 PE=4 SV=1 - [Q6MGC9_RAT]	0	1.96	1	1	1	1	269239	560	61.2388	8.82178
D4A7V6	Protein Casp8ap2 OS=Rattus norvegicus GN=Casp8ap2 PE=4 SV=1 - [D4A7V6_RAT]	0	0.51	1	1	1	1		1962	219.554	6.7124
D3ZP98	Histocompatibility 13 (Predicted), isoform CRA_a OS=Rattus norvegicus GN=Hm13 PE=4 SV=1 - [D3ZP98_RAT]	0	2.75	1	1	1	2	282408	364	40.249	6.7124
G3V8F3	BUD13 homolog OS=Rattus norvegicus GN=Bud13 PE=4 SV=1 - [G3V8F3_RAT]	0	2.04	2	1	1	1		636	71.8361	9.94971
D3ZJ81	Follistatin-like 4 (Predicted) OS=Rattus norvegicus GN=Fstl4 PE=4 SV=1 - [D3ZJ81_RAT]	0	2.16	1	1	1	1	122597	832	91.8727	7.1958
F1MA36	Spectrin beta 3 OS=Rattus norvegicus GN=Sptbn2 PE=2 SV=2 - [F1MA36_RAT]	0	0.67	4	1	2	2	703418	2388	270.849	5.8335
D3ZKI5	PHD finger protein 3 (Predicted) OS=Rattus norvegicus GN=Phf3 PE=4 SV=1 - [D3ZKI5_RAT]	0	0.4	1	1	1	1	622333	2020	225.176	6.87354
D4ADH7	Protein Twistnb OS=Rattus norvegicus GN=Twistnb PE=4 SV=1 - [D4ADH7_RAT]	0	2.18	1	1	1	1	631570	321	35.635	6.26514
D4A8L9	Protein Btbd17 OS=Rattus norvegicus GN=Btbd17 PE=4 SV=1 - [D4A8L9_RAT]	0	3.35	1	1	1	1	973773	507	55.372	9.30518
D3ZL11	Protein Zfyve20 OS=Rattus norvegicus GN=Zfyve20 PE=4 SV=1 - [D3ZL11_RAT]	0	2.68	1	1	1	1		783	88.4222	5.21143
Q7M6Z1	Nucleophosmin/nucleoplasmin 2 OS=Rattus norvegicus GN=Npm2 PE=2 SV=1 - [Q7M6Z1_RAT]	0	10.14	1	1	1	3	1.11718e+07	207	23.2416	5.09717
B1WBY1	Cul1 protein OS=Rattus norvegicus GN=Cul1 PE=2 SV=1 - [B1WBY1_RAT]	0	1.03	1	1	1	1	607832	776	89.635	8.00146
D4AB01	Histidine triad nucleotide binding protein 2 (Predicted), isoform CRA_a OS=Rattus norvegicus GN=Hint2 PE=4 SV=1 - [D4AB01_RAT]	0	9.2	1	1	1	1	1157702	163	17.3693	9.42236
D3ZN38	Protein Stard5 OS=Rattus norvegicus GN=Stard5 PE=4 SV=1 - [D3ZN38_RAT]	0	7.51	1	1	1	1	2.46799e+06	213	23.9398	6.52197
G3V6C0	Class II, major histocompatibility complex, transactivator, isoform CRA_c OS=Rattus norvegicus GN=Ciita PE=4 SV=1 - [G3V6C0_RAT]	0	1.82	2	1	1	1	194315	1153	127.294	5.66846
D4A068	Protein Pnma2 OS=Rattus norvegicus GN=Pnma2 PE=4 SV=1 - [D4A068_RAT]	0	3.02	1	1	1	1	287483	364	41.2222	5.2876
D3ZI07	Kinesin family member 3B (Predicted) OS=Rattus norvegicus GN=Kif3b PE=3 SV=1 - [D3ZI07_RAT]	0	1.2	1	1	1	1	673823	747	85.2048	7.69385
D3Z865	Mannose-P-dolichol utilization defect 1 OS=Rattus norvegicus GN=Mpdu1 PE=4 SV=1 - [D3Z865_RAT]	0	4.45	1	1	1	1	1.31926e+06	247	26.5303	8.55811
G3V6R6	Homeo box A2 OS=Rattus norvegicus GN=Hoxa2 PE=3 SV=1 - [G3V6R6_RAT]	0	2.42	2	1	1	1		372	40.8601	5.8335
D3ZU64	Protein Vps37b OS=Rattus norvegicus GN=Vps37b PE=4 SV=1 - [D3ZU64_RAT]	0	4.21	1	1	1	1	61282.3	285	31.0913	7.04932
D3ZIC6	Mucin and cadherin like, isoform CRA_c OS=Rattus norvegicus GN=Cdhr5 PE=4 SV=1 - [D3ZIC6_RAT]	0	2.09	3	1	1	1	385754	670	72.875	4.80518
D4A8H3	Protein Uba6 OS=Rattus norvegicus GN=Uba6 PE=4 SV=1 - [D4A8H3_RAT]	0	0.95	1	1	1	1	319574	1053	117.856	6.07471
B5DEQ0	Protein Ssr2 OS=Rattus norvegicus GN=Ssr2 PE=2 SV=1 - [B5DEQ0_RAT]	0	4.37	1	1	1	1	1.16653e+06	183	20.0085	8.35303
G3V7G0	Cytoplasmic dynein 1 light intermediate chain 1 OS=Rattus norvegicus GN=Dync1li1 PE=4 SV=1 - [G3V7G0_RAT]	0	2.87	2	1	1	1	706160	523	56.6351	6.29053
D3ZW66	Protein Sgsm2 OS=Rattus norvegicus GN=Sgsm2 PE=4 SV=1 - [D3ZW66_RAT]	0	2.19	1	1	1	1		1005	113.252	6.60986
G3V637	Syntaxin binding protein 2, isoform CRA_b OS=Rattus norvegicus GN=Stxbp2 PE=4 SV=1 - [G3V637_RAT]	0	5.89	2	2	2	2	348934	594	66.6117	6.771
Q6S3A1	Plectin 4 OS=Rattus norvegicus GN=Plec PE=2 SV=1 - [Q6S3A1_RAT]	0	0.18	16	1	1	1	7.9859e+06	4451	506.371	5.68115
Q68G39	Cyclin-dependent kinase 16 OS=Rattus norvegicus GN=Cdk16 PE=2 SV=1 - [Q68G39_RAT]	0	3.02	8	1	2	3	1.67754e+06	496	55.8401	7.62061
D3ZMN2	Protein RGD1311747 OS=Rattus norvegicus GN=RGD1311747 PE=4 SV=1 - [D3ZMN2_RAT]	0	4.84	1	1	1	1	105599	351	39.6933	6.99072
D3ZHY9	Protein Rasal1 OS=Rattus norvegicus GN=Rasal1 PE=2 SV=2 - [D3ZHY9_RAT]	0	2.75	7	2	3	3	4.28461e+06	801	89.5409	6.354
D4ADZ2	Bicaudal D homolog 1 (Drosophila) (Predicted) OS=Rattus norvegicus GN=Bicd1 PE=4 SV=1 - [D4ADZ2_RAT]	0	0.96	1	1	1	1	1.14878e+06	835	95.7722	5.75732
D3ZTR5	Protein Zbed5 OS=Rattus norvegicus GN=Zbed5 PE=4 SV=1 - [D3ZTR5_RAT]	0	0.66	2	1	1	6	2.48014e+06	757	83.9812	8.63135
B1WC45	Protein Vps72 OS=Rattus norvegicus GN=Vps72 PE=2 SV=1 - [B1WC45_RAT]	0	6.04	1	1	1	1		364	40.5126	6.40479
D4A0H5	Cleavage and polyadenylation specific factor 1, 160kDa (Predicted), isoform CRA_a OS=Rattus norvegicus GN=Cpsf1 PE=4 SV=1 - [D4A0H5_RAT]	0	1.01	2	1	1	1		1386	154.783	6.30322
D3ZTY9	Nuclear VCP-like (Predicted) OS=Rattus norvegicus GN=Nvl PE=3 SV=1 - [D3ZTY9_RAT]	0	1.87	1	1	1	1	1.46547e+06	855	94.3885	6.13818
D3ZUC9	Oxidative-stress responsive 1 (Predicted) OS=Rattus norvegicus GN=Oxsr1 PE=4 SV=1 - [D3ZUC9_RAT]	0	2.28	1	1	1	1	108856	527	58.1681	6.56592
Q6P7P7	Zinc finger protein 799 OS=Rattus norvegicus GN=Zfp799 PE=2 SV=1 - [Q6P7P7_RAT]	0	2.31	1	1	1	1	1.75448e+06	649	75.0634	8.77783
Q5RKG4	LOC361335 protein (Fragment) OS=Rattus norvegicus GN=LOC361335 PE=2 SV=1 - [Q5RKG4_RAT]	0	0.71	3	1	1	1		991	108.46	6.49365
O08662	230kDa phosphatidylinositol 4-kinase OS=Rattus norvegicus GN=Pi4ka PE=2 SV=1 - [O08662_RAT]	0	0.69	2	1	1	1	893176	2041	231.171	6.99072
Q63044	Amelin 2 OS=Rattus norvegicus GN=Ambn PE=2 SV=1 - [Q63044_RAT]	0	4.01	3	1	1	1		324	34.4639	5.09717
Q8K3W5	Myotubularin-related protein (Fragment) OS=Rattus norvegicus GN=Mtmr9 PE=2 SV=1 - [Q8K3W5_RAT]	0	2.2	2	1	1	1	1.00026e+06	499	57.6162	6.97607
A9CMB6	Lct protein OS=Rattus norvegicus GN=Lct PE=3 SV=1 - [A9CMB6_RAT]	0	0.98	2	1	1	2	3139.73	1929	217.48	6.27783
D4A9B0	Protein Srbd1 OS=Rattus norvegicus GN=Srbd1 PE=4 SV=2 - [D4A9B0_RAT]	0	0.82	2	1	1	2		980	110.074	8.82178
D3ZF50	Protein RGD1310335 OS=Rattus norvegicus GN=RGD1310335 PE=4 SV=1 - [D3ZF50_RAT]	0	0.55	1	1	1	1		909	102.379	6.17627
D3ZHH5	Protein Ccdc158 OS=Rattus norvegicus GN=Ccdc158 PE=2 SV=1 - [D3ZHH5_RAT]	0	0.81	1	1	1	1		1111	126.766	6.354
F1LT52	Protein LOC690284 (Fragment) OS=Rattus norvegicus GN=LOC690284 PE=4 SV=1 - [F1LT52_RAT]	0	3.59	2	1	1	1		640	69.1577	7.29834
F1M4R8	cAMP-specific 3',5'-cyclic phosphodiesterase 4A OS=Rattus norvegicus GN=Pde4a PE=2 SV=2 - [F1M4R8_RAT]	0	0.66	5	1	1	2	1.57632e+06	761	83.9887	5.12256
F1M063	Uncharacterized protein (Fragment) OS=Rattus norvegicus PE=4 SV=2 - [F1M063_RAT]	0	1.33	1	1	2	2	502529	1206	136.906	7.75244
F1M804	Uncharacterized protein (Fragment) OS=Rattus norvegicus PE=2 SV=2 - [F1M804_RAT]	0	0.55	1	1	1	1	695231	1823	210.346	5.42725
M0R6J5	Uncharacterized protein (Fragment) OS=Rattus norvegicus PE=4 SV=1 - [M0R6J5_RAT]	0	0.87	1	1	1	1	6.17872e+06	809	91.0222	8.93896
M0RDQ6	Protein RGD1561609 OS=Rattus norvegicus GN=RGD1561609 PE=4 SV=1 - [M0RDQ6_RAT]	0	0.85	3	1	1	1	751712	819	90.6979	7.97217
M0R8J4	Protein LOC687472 (Fragment) OS=Rattus norvegicus GN=LOC687472 PE=4 SV=1 - [M0R8J4_RAT]	0	0.45	1	1	2	2	9.64911e+06	2695	311.996	8.52881
F1MAF8	Uncharacterized protein OS=Rattus norvegicus PE=4 SV=1 - [F1MAF8_RAT]	0	0.29	1	1	1	1	9.18591e+07	2075	231.321	5.87158
D3ZYN2	Protein Kif21a (Fragment) OS=Rattus norvegicus GN=Kif21a PE=2 SV=2 - [D3ZYN2_RAT]	0	0.37	2	1	1	4		1602	179.223	6.32861
F1LS68	Protein Psme4 OS=Rattus norvegicus GN=Psme4 PE=2 SV=2 - [F1LS68_RAT]	0	0.87	1	1	1	1		1844	211.303	7.1665
D3Z9S8	Protein Wdr72 OS=Rattus norvegicus GN=Wdr72 PE=2 SV=2 - [D3Z9S8_RAT]	0	0.76	1	1	1	1		1051	117.313	6.78564
D3ZNI9	Potassium channel subfamily T member 1 OS=Rattus norvegicus GN=Kcnt1 PE=2 SV=1 - [D3ZNI9_RAT]	0	2.08	4	1	1	1		1203	136.753	7.29834
F1LW29	Protein Tshz1 (Fragment) OS=Rattus norvegicus GN=Tshz1 PE=4 SV=1 - [F1LW29_RAT]	0	0.65	1	1	1	1		1070	116.978	6.87354
D4A985	Uncharacterized protein OS=Rattus norvegicus PE=4 SV=1 - [D4A985_RAT]	0	1.08	1	1	1	1	756783	556	62.2865	7.04932
D3ZUQ8	Protein Szt2 OS=Rattus norvegicus GN=Szt2 PE=2 SV=2 - [D3ZUQ8_RAT]	0	0.32	1	1	1	1		3431	377.267	6.20166
F1M855	Glutamate receptor ionotropic, kainate 2 (Fragment) OS=Rattus norvegicus GN=Grik2 PE=2 SV=2 - [F1M855_RAT]	0	1.61	2	1	1	1		872	98.3511	7.15186
D3ZFU9	Protein Mylk OS=Rattus norvegicus GN=Mylk PE=2 SV=2 - [D3ZFU9_RAT]	0	0.41	1	1	1	3		1961	214.778	6.02393
D4AAW3	Protein Efcab6 OS=Rattus norvegicus GN=Efcab6 PE=2 SV=1 - [D4AAW3_RAT]	0	1.48	2	1	1	1	216719	676	78.2728	7.88428
D4A625	Protein Eri2 OS=Rattus norvegicus GN=Eri2 PE=4 SV=1 - [D4A625_RAT]	0	1.31	1	1	1	1	117468	687	76.4905	8.54346
D4AEI5	Protein Myef2 OS=Rattus norvegicus GN=Myef2 PE=2 SV=1 - [D4AEI5_RAT]	0	1.52	1	1	1	1	563252	591	63.3093	8.86572
F1LTF8	Protein Lama4 OS=Rattus norvegicus GN=Lama4 PE=4 SV=2 - [F1LTF8_RAT]	0	0.34	1	1	1	1	2.97618e+06	1761	195.502	6.52197
D4A1D3	Protein Sacs OS=Rattus norvegicus GN=Sacs PE=2 SV=1 - [D4A1D3_RAT]	0	0.26	2	1	2	4	7.74744e+06	4578	519.758	7.10791
M0R919	Protein LOC681825 OS=Rattus norvegicus GN=LOC681825 PE=4 SV=1 - [M0R919_RAT]	0	4.05	1	1	1	1	932290	173	19.5891	6.07471
D3ZLP7	Protein Epg5 OS=Rattus norvegicus GN=Epg5 PE=4 SV=2 - [D3ZLP7_RAT]	0	0.62	1	1	1	1	208614	2573	290.654	6.32861
Q7M6Y8	Putative uncharacterized protein OS=Rattus norvegicus GN=Slc9c1 PE=2 SV=1 - [Q7M6Y8_RAT]	0	2.6	2	1	1	1		883	102.206	8.47021
F1LQW3	Protein Sfpq (Fragment) OS=Rattus norvegicus GN=Sfpq PE=4 SV=1 - [F1LQW3_RAT]	0	2.48	2	2	2	4	1.88524e+06	606	65.6544	8.80713
F1LRE2	Insulin-like growth factor-binding protein complex acid labile subunit (Fragment) OS=Rattus norvegicus GN=Igfals PE=2 SV=1 - [F1LRE2_RAT]	0	3.32	1	1	1	1	1.71054e+06	602	66.7087	6.55127
F7FDM3	Protein Mtif2 (Fragment) OS=Rattus norvegicus GN=Mtif2 PE=3 SV=1 - [F7FDM3_RAT]	0	1.89	2	1	1	1	1.46682e+06	528	58.4135	5.98584
F1LPX0	Mitochondrial intermediate peptidase OS=Rattus norvegicus GN=Mipep PE=2 SV=1 - [F1LPX0_RAT]	0	2.96	2	1	1	1	3.03237e+07	710	80.6023	6.46826
M0R784	Probable N-acetyltransferase CML2 OS=Rattus norvegicus GN=Cml2 PE=4 SV=1 - [M0R784_RAT]	0	2.65	3	1	1	1	1.59266e+06	226	25.5044	9.64209
F1LSC4	Protein Dhx57 OS=Rattus norvegicus GN=Dhx57 PE=2 SV=1 - [F1LSC4_RAT]	0	0.65	1	1	1	1	2.49181e+06	1391	155.667	7.82568
D3ZBC9	Protein Maats1 OS=Rattus norvegicus GN=Maats1 PE=4 SV=1 - [D3ZBC9_RAT]	0	2.82	1	1	2	2		780	91.018	7.40088
F1LN42	Protein Tns1 OS=Rattus norvegicus GN=Tns1 PE=2 SV=2 - [F1LN42_RAT]	0	0.63	1	1	1	1		1909	203.784	7.76709
D3ZIZ6	Multidrug resistance-associated protein 9 OS=Rattus norvegicus GN=Abcc12 PE=3 SV=1 - [D3ZIZ6_RAT]	0	0.54	4	1	1	1	9.64645e+06	1287	144.178	7.92822
D3ZDP2	Protein Ict1 OS=Rattus norvegicus GN=Ict1 PE=4 SV=1 - [D3ZDP2_RAT]	0	5.83	1	1	1	1		206	23.4554	10.1841
D3ZTJ3	Protein Adamts12 OS=Rattus norvegicus GN=Adamts12 PE=2 SV=2 - [D3ZTJ3_RAT]	0	0.44	1	1	1	1	6.06595e+06	1599	178.379	7.57666
M0R6X6	Uncharacterized protein (Fragment) OS=Rattus norvegicus PE=4 SV=1 - [M0R6X6_RAT]	0	1.84	4	1	1	1	3.22621e+06	435	50.2388	8.92432
O35812	PHEX protein OS=Rattus norvegicus GN=Phex PE=2 SV=1 - [O35812_RAT]	0	1.74	1	1	1	1		749	86.2509	8.77783
B2RYF3	Ldb1 protein (Fragment) OS=Rattus norvegicus GN=Ldb1 PE=2 SV=1 - [B2RYF3_RAT]	0	1.5	1	1	1	1	1.06407e+07	467	51.9993	8.47021
F1LSY2	Neuronal pentraxin receptor (Fragment) OS=Rattus norvegicus GN=Nptxr PE=2 SV=1 - [F1LSY2_RAT]	0	5.26	2	1	1	1		494	52.2069	6.02393
D4AB33	Uncharacterized protein OS=Rattus norvegicus GN=Peg3 PE=2 SV=1 - [D4AB33_RAT]	0	0.64	1	1	1	1	3.0509e+06	1560	178.085	5.41455
D3ZQJ8	Protein Prss56 OS=Rattus norvegicus GN=Prss56 PE=4 SV=2 - [D3ZQJ8_RAT]	0	0.99	2	1	1	4	4.89607e+06	607	65.5555	7.7085
D3ZTR6	Protein LOC100911439 OS=Rattus norvegicus GN=Nyap1 PE=2 SV=2 - [D3ZTR6_RAT]	0	0.87	1	1	1	1	1.04171e+07	801	83.5842	9.36377
F7FLS6	Leucine zipper putative tumor suppressor 2 OS=Rattus norvegicus GN=Lzts2 PE=4 SV=1 - [F7FLS6_RAT]	0	1.04	2	1	1	1	284632	670	72.5348	6.97607
M0R8W1	Protein Sirpb2-ps1 (Fragment) OS=Rattus norvegicus GN=Sirpb2-ps1 PE=4 SV=1 - [M0R8W1_RAT]	0	6.25	1	1	1	1	522718	256	28.2467	7.79639
F1M0K3	Protein Cmya5 (Fragment) OS=Rattus norvegicus GN=Cmya5 PE=4 SV=2 - [F1M0K3_RAT]	0	0.22	2	1	1	1	874021	3635	400.416	4.77979
Q99PF3	APEX (Fragment) OS=Rattus norvegicus GN=Apex1 PE=2 SV=1 - [Q99PF3_RAT]	0	6.92	2	2	2	2	994532	289	32.3325	8.57275
B0VXR4	JIP3 protein OS=Rattus norvegicus GN=Mapk8ip3 PE=2 SV=1 - [B0VXR4_RAT]	0	2.87	2	1	1	1	1.59892e+06	1322	145.528	5.45264
D3ZQE7	Protein Jakmip2 OS=Rattus norvegicus GN=Jakmip2 PE=4 SV=2 - [D3ZQE7_RAT]	0	1.05	1	1	1	1	173025	857	100.184	7.66455
B1H279	Putative uncharacterized protein OS=Rattus norvegicus GN=LOC100361627 PE=2 SV=1 - [B1H279_RAT]	0	1.42	2	1	1	1	1.49199e+06	703	80.8166	6.43018
F1LW91	Protein Numa1 (Fragment) OS=Rattus norvegicus GN=Numa1 PE=2 SV=1 - [F1LW91_RAT]	0	1.11	3	2	2	2	396455	2078	233.28	5.70654
F1LSH0	Protein Sympk OS=Rattus norvegicus GN=Sympk PE=2 SV=2 - [F1LSH0_RAT]	0	1.8	1	1	1	1	435064	1280	142.039	6.04932
G3V8Y3	Kinesin-like protein KIF15 OS=Rattus norvegicus GN=Kif15 PE=4 SV=2 - [G3V8Y3_RAT]	0	0.47	2	1	1	1	6.14913e+06	1266	146.746	5.70654
D3ZG78	Protein Zzef1 OS=Rattus norvegicus GN=Zzef1 PE=4 SV=1 - [D3ZG78_RAT]	0	0.82	1	1	1	2	1.33931e+06	2924	327.884	5.96045
E9PSK0	Protein Man2b2 OS=Rattus norvegicus GN=Man2b2 PE=2 SV=1 - [E9PSK0_RAT]	0	1.63	3	1	1	1		981	112.201	7.15186
M0RB42	Uncharacterized protein (Fragment) OS=Rattus norvegicus PE=4 SV=1 - [M0RB42_RAT]	0	2.27	1	1	1	1		485	55.6074	6.31592
D4A081	Protein LOC100911180 OS=Rattus norvegicus GN=Setdb1 PE=2 SV=1 - [D4A081_RAT]	0	1.15	1	1	1	1		1302	143.898	5.98584
F1ABR3	Advanced glycosylation end product-specific receptor variant 2 OS=Rattus norvegicus GN=Ager PE=2 SV=1 - [F1ABR3_RAT]	0	7.07	4	1	1	1	2.85419e+06	368	39.1673	5.92236
D4ABY2	Protein Copg2 OS=Rattus norvegicus GN=Copg2 PE=2 SV=2 - [D4ABY2_RAT]	0	0.98	1	1	1	1		715	80.437	6.49365
A4K5G8	WDR16-like protein OS=Rattus norvegicus GN=Usp43 PE=2 SV=1 - [A4K5G8_RAT]	0	1.77	2	1	1	1	1.46689e+08	620	68.2485	6.84424
B5DEI5	Rics protein (Fragment) OS=Rattus norvegicus GN=Rics PE=2 SV=1 - [B5DEI5_RAT]	0	1.76	2	1	1	1		1591	173.298	7.1665
M0RBC7	Protein Bco2 (Fragment) OS=Rattus norvegicus GN=Bco2 PE=4 SV=1 - [M0RBC7_RAT]	0	5.96	3	1	1	1	404073	151	17.2236	10.4917
M0R959	Protein LOC687861 OS=Rattus norvegicus GN=LOC687861 PE=4 SV=1 - [M0R959_RAT]	0	4.22	2	1	1	1	388964	237	26.2165	9.05615
K9N0M9	CDK5 regulatory subunit associated protein 1-like 1 OS=Rattus norvegicus GN=CDKAL1 PE=2 SV=1 - [K9N0M9_RAT]	0	4.84	1	1	1	1		578	64.9531	7.88428
