# Supplementary material for: Mysterious inhibitory cell regulator investigated and found likely to be secretogranin II related
Source: PeerJ. 2017 Oct 13;5:e3833. doi: 10.7717/peerj.3833 (PMC5642266; doi:10.7717/peerj.3833)
Supplement: Supplemental Information 14 — Test specifics 424. [file peerj-05-3833-s014.xlsx]

## Sheet: Sheet1
Accession	Description	A5: Area	B5: Area	Score A2	Coverage A2	# Peptides A2	# PSM A2	Score B2	Coverage B2	# Peptides B2	# PSM B2	# AAs	MW [kDa]	calc. pI
P36876	Serine/threonine-protein phosphatase 2A 55 kDa regulatory subunit B alpha isoform OS=Rattus norvegicus GN=Ppp2r2a PE=2 SV=1 - [2ABA_RAT]	0	747212					7.6829	4.92	2	3	447	51.6455	6.20166	A: H2
Q3T1L0	Aldehyde dehydrogenase family 16 member A1 OS=Rattus norvegicus GN=Aldh16a1 PE=2 SV=1 - [A16A1_RAT]	0	263146					3.48128	1.75	1	1	802	85.3607	6.15088	B: H1
P0C1X8	AP2-associated protein kinase 1 OS=Rattus norvegicus GN=Aak1 PE=1 SV=1 - [AAK1_RAT]	0	412661					9.90025	1.56	1	3	962	103.697	6.50732
P18163	Long-chain-fatty-acid--CoA ligase 1 OS=Rattus norvegicus GN=Acsl1 PE=1 SV=1 - [ACSL1_RAT]	0	975353					1.84743	1.72	1	1	699	78.1282	6.99072
Q02589	[Protein ADP-ribosylarginine] hydrolase OS=Rattus norvegicus GN=Adprh PE=1 SV=2 - [ADPRH_RAT]	0	1.05797e+06					2.02841	3.04	1	1	362	39.9354	5.99854
P56522	NADPH:adrenodoxin oxidoreductase, mitochondrial OS=Rattus norvegicus GN=Fdxr PE=1 SV=1 - [ADRO_RAT]	0	654552					2.11002	2.43	1	1	494	54.3287	9.23193
P25304-6	Isoform 6 of Agrin OS=Rattus norvegicus GN=Agrn - [AGRIN_RAT]	0	0					1.63061	0.77	1	1	1955	208.01	6.06201
O35817	A-kinase anchor protein 14 OS=Rattus norvegicus GN=Akap14 PE=2 SV=1 - [AKA14_RAT]	0	1.06995e+06					1.68972	1.79	1	1	502	55.7216	9.72998
P55260	Annexin A4 OS=Rattus norvegicus GN=Anxa4 PE=1 SV=3 - [ANXA4_RAT]	0	125169					3.37424	4.7	1	1	319	35.826	5.43994
Q32Q06	AP-1 complex subunit mu-1 OS=Rattus norvegicus GN=Ap1m1 PE=1 SV=3 - [AP1M1_RAT]	0	1.09377e+06					6.89631	2.6	1	3	423	48.526	7.29834
P84092	AP-2 complex subunit mu OS=Rattus norvegicus GN=Ap2m1 PE=1 SV=1 - [AP2M1_RAT]	0	3.19888e+06					20.7823	16.32	6	9	435	49.623	9.53955
P53678	AP-3 complex subunit mu-2 OS=Rattus norvegicus GN=Ap3m2 PE=2 SV=1 - [AP3M2_RAT]	0	633876					1.62733	2.87	1	1	418	46.8444	7.56201
P02650	Apolipoprotein E OS=Rattus norvegicus GN=Apoe PE=1 SV=2 - [APOE_RAT]	0	0					1.74176	2.88	1	1	312	35.7313	5.2749
Q6AY65	Arfaptin-2 OS=Rattus norvegicus GN=Arfip2 PE=2 SV=1 - [ARFP2_RAT]	0	946446					3.94047	3.23	1	2	341	37.7493	5.87158
Q4KLF8	Actin-related protein 2/3 complex subunit 5 OS=Rattus norvegicus GN=Arpc5 PE=1 SV=3 - [ARPC5_RAT]	0	225942					2.55935	8.61	1	1	151	16.3103	5.66846
Q1M168	Caytaxin OS=Rattus norvegicus GN=Atcay PE=1 SV=1 - [ATCAY_RAT]	0	1.05118e+06					5.81019	3.49	1	2	372	42.0908	4.65283
Q6AZ50	Ubiquitin-like-conjugating enzyme ATG3 OS=Rattus norvegicus GN=Atg3 PE=2 SV=1 - [ATG3_RAT]	0	550838					9.9975	4.14	1	4	314	35.7995	4.7417
P07151	Beta-2-microglobulin OS=Rattus norvegicus GN=B2m PE=1 SV=1 - [B2MG_RAT]	0	1.5955e+06					2.27408	7.56	1	1	119	13.7111	8.00146
Q5M9G3	Caprin-1 OS=Rattus norvegicus GN=Caprin1 PE=1 SV=2 - [CAPR1_RAT]	0	1.25657e+06					2.77609	1.56	1	1	707	78.0729	5.24951
Q5U2Q3	Ester hydrolase C11orf54 homolog OS=Rattus norvegicus PE=1 SV=1 - [CK054_RAT]	0	0					0	3.81	1	1	315	34.9704	6.62451
A8IHN8	Uncharacterized protein C11orf96 homolog OS=Rattus norvegicus GN=Ag2 PE=2 SV=1 - [CK096_RAT]	0	1.44478e+06					0	2.48	1	1	242	26.0804	10.1548
Q99JD4	CLIP-associating protein 2 OS=Rattus norvegicus GN=Clasp2 PE=2 SV=1 - [CLAP2_RAT]	0	381407					5.5697	2.8	2	2	1286	140.551	8.57275
A9ZSY0	Centlein (Fragment) OS=Rattus norvegicus GN=Cntln PE=2 SV=1 - [CNTLN_RAT]	0	6.77159e+06					0	3.19	2	2	721	82.6697	8.11865
P97846	Contactin-associated protein 1 OS=Rattus norvegicus GN=Cntnap1 PE=1 SV=1 - [CNTP1_RAT]	0	0					1.7356	0.65	1	1	1381	155.769	6.99072
Q68FP9	Conserved oligomeric Golgi complex subunit 6 OS=Rattus norvegicus GN=Cog6 PE=2 SV=1 - [COG6_RAT]	0	0					0	1.52	1	1	657	72.9105	6.21436
B0BNA5	Coactosin-like protein OS=Rattus norvegicus GN=Cotl1 PE=1 SV=1 - [COTL1_RAT]	0	628327					1.64091	5.63	1	1	142	15.922	5.40186
P10888	Cytochrome c oxidase subunit 4 isoform 1, mitochondrial OS=Rattus norvegicus GN=Cox4i1 PE=1 SV=1 - [COX41_RAT]	0	1.41821e+06					1.67295	5.92	1	1	169	19.5021	9.43701
Q9JHL4-4	Isoform 4 of Drebrin-like protein OS=Rattus norvegicus GN=Dbnl - [DBNL_RAT]	0	0					0	1.62	1	1	431	48.0953	4.94482
O08875	Serine/threonine-protein kinase DCLK1 OS=Rattus norvegicus GN=Dclk1 PE=2 SV=1 - [DCLK1_RAT]	0	716546					1.99262	3	1	1	433	47.6511	5.75732
Q6MG60	N(G),N(G)-dimethylarginine dimethylaminohydrolase 2 OS=Rattus norvegicus GN=Ddah2 PE=1 SV=1 - [DDAH2_RAT]	0	436525					3.11706	4.21	1	1	285	29.6694	6.01123
Q6AXS3	Protein DEK OS=Rattus norvegicus GN=Dek PE=2 SV=1 - [DEK_RAT]	0	0					0	2.65	1	2	378	42.8659	7.69385
P62628	Dynein light chain roadblock-type 1 OS=Rattus norvegicus GN=Dynlrb1 PE=1 SV=3 - [DLRB1_RAT]	0	899396					2.22182	12.5	1	1	96	10.9828	7.25439
Q62894	Extracellular matrix protein 1 OS=Rattus norvegicus GN=Ecm1 PE=2 SV=2 - [ECM1_RAT]	0	0					0	1.78	1	1	562	63.208	6.87354
Q4G061	Eukaryotic translation initiation factor 3 subunit B OS=Rattus norvegicus GN=Eif3b PE=1 SV=1 - [EIF3B_RAT]	0	400922					2.50194	1.63	1	1	797	90.854	5.08447
Q5RK09	Eukaryotic translation initiation factor 3 subunit G OS=Rattus norvegicus GN=Eif3g PE=2 SV=1 - [EIF3G_RAT]	0	2.86913e+06					1.86724	2.81	1	1	320	35.6289	5.89697
Q6ED65-3	Isoform 3 of Echinoderm microtubule-associated protein-like 5 OS=Rattus norvegicus GN=Eml5 - [EMAL5_RAT]	0	0					0	0.94	1	1	1166	129.837	7.78174
Q07303	Erythropoietin receptor OS=Rattus norvegicus GN=Epor PE=2 SV=1 - [EPOR_RAT]	0	0					0	2.76	1	1	507	55.4647	5.18604
P25093	Fumarylacetoacetase OS=Rattus norvegicus GN=Fah PE=1 SV=1 - [FAAA_RAT]	0	609084					2.44252	5.01	2	2	419	45.946	7.1665
P85845	Fascin OS=Rattus norvegicus GN=Fscn1 PE=1 SV=2 - [FSCN1_RAT]	0	1.12177e+06					1.60904	2.43	1	1	493	54.4569	6.7417
O88871	Gamma-aminobutyric acid type B receptor subunit 2 OS=Rattus norvegicus GN=Gabbr2 PE=1 SV=2 - [GABR2_RAT]	0	53041.6					2.19554	2.23	1	1	940	105.684	8.71924
Q499U4	Growth arrest-specific protein 8 OS=Rattus norvegicus GN=Gas8 PE=2 SV=1 - [GAS8_RAT]	0	1.79504e+06					0	1.88	1	1	478	56.2777	8.39697
P50442	Glycine amidinotransferase, mitochondrial OS=Rattus norvegicus GN=Gatm PE=1 SV=1 - [GATM_RAT]	0	0					1.97555	4.49	2	2	423	48.211	7.48877
Q9QYC6	Probable G-protein coupled receptor 37 OS=Rattus norvegicus GN=Gpr37 PE=2 SV=1 - [GPR37_RAT]	0	648519					5.1401	2.16	1	2	603	66.9177	7.97217
P23764	Glutathione peroxidase 3 OS=Rattus norvegicus GN=Gpx3 PE=2 SV=2 - [GPX3_RAT]	0	2.87835e+06					7.27736	12.83	2	3	226	25.4088	8.11865
P36970-2	Isoform Cytoplasmic of Phospholipid hydroperoxide glutathione peroxidase, mitochondrial OS=Rattus norvegicus GN=Gpx4 - [GPX41_RAT]	0	1.43615e+06					2.46844	6.47	1	1	170	19.4783	8.00146
P31421	Metabotropic glutamate receptor 2 OS=Rattus norvegicus GN=Grm2 PE=1 SV=1 - [GRM2_RAT]	0	0					0	2.87	1	1	872	95.7123	7.79639
P23897	Heat-stable enterotoxin receptor OS=Rattus norvegicus GN=Gucy2c PE=2 SV=2 - [GUC2C_RAT]	0	0					0	1.03	1	1	1072	123.388	6.84424
P62804	Histone H4 OS=Rattus norvegicus GN=Hist1h4b PE=1 SV=2 - [H4_RAT]	0	623238					2.42649	9.71	1	1	103	11.3604	11.356
Q5BKC6	HSPB1-associated protein 1 OS=Rattus norvegicus GN=Hspbap1 PE=1 SV=1 - [HBAP1_RAT]	0	7.07517e+06					0	1.25	1	1	479	54.1743	5.5415
P20059	Hemopexin OS=Rattus norvegicus GN=Hpx PE=1 SV=3 - [HEMO_RAT]	0	1.07722e+06					2.26907	1.96	1	1	460	51.3183	7.6499
Q5M808	Protein Hikeshi OS=Rattus norvegicus PE=2 SV=2 - [HIKES_RAT]	0	553825					5.2479	6.6	1	2	197	21.6048	5.45264
D4A5C3	3-hydroxymethyl-3-methylglutaryl-CoA lyase, cytoplasmic OS=Rattus norvegicus GN=Hmgcll1 PE=1 SV=1 - [HMGC2_RAT]	0	1.11153e+06					0	2.04	1	1	343	36.5253	6.1001
O08656	Homeobox protein Hox-A1 OS=Rattus norvegicus GN=Hoxa1 PE=2 SV=1 - [HXA1_RAT]	0	99375.9					0	5.11	1	1	333	36.1021	7.7085
Q6AXU3	Interferon-stimulated 20 kDa exonuclease-like 2 OS=Rattus norvegicus GN=Isg20l2 PE=2 SV=1 - [I20L2_RAT]	0	0					1.93922	3.25	1	1	369	41.2851	9.94971
Q5XI72	Eukaryotic translation initiation factor 4H OS=Rattus norvegicus GN=Eif4h PE=1 SV=1 - [IF4H_RAT]	0	795374					4.42152	5.24	1	2	248	27.3074	7.2251
Q9JIL3	Interleukin enhancer-binding factor 3 OS=Rattus norvegicus GN=Ilf3 PE=1 SV=2 - [ILF3_RAT]	0	544411					2.05558	1.45	1	1	897	95.8753	8.74854
Q9WUK5	Inhibin beta C chain OS=Rattus norvegicus GN=Inhbc PE=2 SV=1 - [INHBC_RAT]	0	0					0	5.13	1	1	351	39.31	7.81104
Q3SWS9	Janus kinase and microtubule-interacting protein 1 OS=Rattus norvegicus GN=Jakmip1 PE=1 SV=1 - [JKIP1_RAT]	0	788925					2.12077	1.44	1	1	626	73.0621	6.0874
Q6AYK2	Bifunctional arginine demethylase and lysyl-hydroxylase JMJD6 OS=Rattus norvegicus GN=Jmjd6 PE=2 SV=2 - [JMJD6_RAT]	0	3.40731e+07					5.13713	1.49	1	3	403	46.5112	8.89502
Q99MK2-2	Isoform 2 of Histone acetyltransferase KAT5 OS=Rattus norvegicus GN=Kat5 - [KAT5_RAT]	0	0					0	1.08	1	2	461	53.0592	8.45557
Q5TKR9	Histone acetyltransferase KAT6A OS=Rattus norvegicus GN=Kat6a PE=2 SV=2 - [KAT6A_RAT]	0	9.43115e+06					0	0.4	1	1	1998	223.19	5.69385
B1WC97	BTB/POZ domain-containing protein KCTD7 OS=Rattus norvegicus GN=Kctd7 PE=2 SV=1 - [KCTD7_RAT]	0	0					1.73009	5.88	1	1	289	33.0715	6.07471
O88202	60 kDa lysophospholipase OS=Rattus norvegicus GN=Aspg PE=1 SV=1 - [LPP60_RAT]	0	0					0	1.24	1	2	564	60.7561	5.77002
Q4KLL3	Leucine-rich repeat-containing protein 55 OS=Rattus norvegicus GN=Lrrc55 PE=2 SV=2 - [LRC55_RAT]	0	0					0	6.43	1	1	311	34.4332	6.32861
D3ZAL8	Leucine-rich repeat transmembrane neuronal protein 3 OS=Rattus norvegicus GN=Lrrtm3 PE=3 SV=1 - [LRRT3_RAT]	0	1.22873e+06					0	0.86	1	3	582	65.9882	9.18799
Q9QYL8	Acyl-protein thioesterase 2 OS=Rattus norvegicus GN=Lypla2 PE=1 SV=1 - [LYPA2_RAT]	0	1.63354e+06					3.47708	3.46	1	4	231	24.7907	7.2251
P0C5H9	Mesencephalic astrocyte-derived neurotrophic factor OS=Rattus norvegicus GN=Manf PE=1 SV=1 - [MANF_RAT]	0	0					5.3883	7.82	1	2	179	20.3746	8.25049
Q810W7-2	Isoform 2 of Microtubule-associated serine/threonine-protein kinase 1 OS=Rattus norvegicus GN=Mast1 - [MAST1_RAT]	0	7.81409e+06					4.17459	1.27	2	3	1570	170.876	8.07471
P23097	Collagenase 3 (Fragment) OS=Rattus norvegicus GN=Mmp13 PE=1 SV=1 - [MMP13_RAT]	0	0					0	1.5	1	1	466	53.3411	5.33838
Q5HZE4	Methylthioribose-1-phosphate isomerase OS=Rattus norvegicus GN=Mri1 PE=2 SV=1 - [MTNA_RAT]	0	1.08415e+06					6.57108	6.23	2	3	369	39.5625	6.04932
Q62667	Major vault protein OS=Rattus norvegicus GN=Mvp PE=1 SV=4 - [MVP_RAT]	0	245177					0	1.05	1	1	861	95.7391	5.57959
Q1HCL7	NAD kinase domain-containing protein 1, mitochondrial OS=Rattus norvegicus GN=Nadkd1 PE=2 SV=1 - [NAKD1_RAT]	0	1.12158e+06					2.221	2.82	1	1	425	48.0866	6.94678
Q497B0	Omega-amidase NIT2 OS=Rattus norvegicus GN=Nit2 PE=1 SV=1 - [NIT2_RAT]	0	819544					11.4717	11.59	2	3	276	30.6817	7.29834
Q62609-3	Isoform 3 of Noelin OS=Rattus norvegicus GN=Olfm1 - [NOE1_RAT]	0	2.29523e+06					2.28184	2.41	1	1	457	52.6842	6.80029
Q9Z2G8	Nucleosome assembly protein 1-like 1 OS=Rattus norvegicus GN=Nap1l1 PE=2 SV=1 - [NP1L1_RAT]	0	286940					2.78142	4.36	1	1	390	45.2849	4.50049
P13084-2	Isoform B23.2 of Nucleophosmin OS=Rattus norvegicus GN=Npm1 - [NPM_RAT]	0	2.27671e+06					10.7395	13.23	3	4	257	28.3677	4.69092
P05982	NAD(P)H dehydrogenase [quinone] 1 OS=Rattus norvegicus GN=Nqo1 PE=1 SV=4 - [NQO1_RAT]	0	965683					5.18951	9.49	2	2	274	30.927	8.42627
P03889	NADH-ubiquinone oxidoreductase chain 1 OS=Rattus norvegicus GN=Mtnd1 PE=1 SV=2 - [NU1M_RAT]	0	5.49405e+06					9.12537	2.83	1	4	318	36.1529	6.93213
P70582	Nuclear pore complex protein Nup54 OS=Rattus norvegicus GN=Nup54 PE=1 SV=1 - [NUP54_RAT]	0	345227					3.61009	3.33	1	1	510	55.7105	7.02002
Q6AYE5	Out at first protein homolog OS=Rattus norvegicus GN=Oaf PE=2 SV=1 - [OAF_RAT]	0	414410					2.21768	4.26	1	1	282	31.7553	7.59131
P56719	Orexin receptor type 2 OS=Rattus norvegicus GN=Hcrtr2 PE=2 SV=1 - [OX2R_RAT]	0	0					0	1.52	1	1	460	52.4553	9.0708
Q4V8B0-3	Isoform 3 of Oxidation resistance protein 1 OS=Rattus norvegicus GN=Oxr1 - [OXR1_RAT]	0	277817					3.5679	7.41	1	1	216	24.4341	6.43018
Q64303	Serine/threonine-protein kinase PAK 2 OS=Rattus norvegicus GN=Pak2 PE=1 SV=1 - [PAK2_RAT]	0	510335					3.26135	3.44	1	1	524	57.9238	5.77002
P04961	Proliferating cell nuclear antigen OS=Rattus norvegicus GN=Pcna PE=1 SV=1 - [PCNA_RAT]	0	574148					7.46111	16.48	3	4	261	28.7303	4.69092
Q9JID1-2	Isoform 2 of Programmed cell death protein 4 OS=Rattus norvegicus GN=Pdcd4 - [PDCD4_RAT]	0	222357					2.03806	3.94	1	1	432	47.5217	5.09717
Q01062	cGMP-dependent 3',5'-cyclic phosphodiesterase OS=Rattus norvegicus GN=Pde2a PE=1 SV=2 - [PDE2A_RAT]	0	348255					3.53605	2.16	1	1	928	104.597	5.51611
Q64536	[Pyruvate dehydrogenase [lipoamide]] kinase isozyme 2, mitochondrial OS=Rattus norvegicus GN=Pdk2 PE=1 SV=1 - [PDK2_RAT]	0	0					0	2.21	1	1	407	46.0761	6.60986
P31044	Phosphatidylethanolamine-binding protein 1 OS=Rattus norvegicus GN=Pebp1 PE=1 SV=3 - [PEBP1_RAT]	0	1.00584e+06					2.96007	7.49	1	1	187	20.7884	5.79541
P16446	Phosphatidylinositol transfer protein alpha isoform OS=Rattus norvegicus GN=Pitpna PE=1 SV=2 - [PIPNA_RAT]	0	820936					0	2.95	1	1	271	31.8871	6.3667
Q5U2N3	Membrane-associated phosphatidylinositol transfer protein 1 OS=Rattus norvegicus GN=Pitpnm1 PE=2 SV=1 - [PITM1_RAT]	0	1.84276e+07					0	0.72	1	1	1242	134.899	5.96045
Q99JE6	1-phosphatidylinositol 4,5-bisphosphate phosphodiesterase beta-3 OS=Rattus norvegicus GN=Plcb3 PE=1 SV=2 - [PLCB3_RAT]	0	3.99145e+06					1.61437	0.49	1	1	1234	139.363	5.8335
Q9JMJ4	Pre-mRNA-processing factor 19 OS=Rattus norvegicus GN=Prpf19 PE=2 SV=2 - [PRP19_RAT]	0	1.13469e+06					6.5045	4.96	2	4	504	55.2044	6.60986
Q6AYG3	Protein prune homolog OS=Rattus norvegicus GN=Prune PE=2 SV=1 - [PRUNE_RAT]	0	848830					2.45926	2.42	1	1	454	49.9665	5.07178
P21670	Proteasome subunit alpha type-4 OS=Rattus norvegicus GN=Psma4 PE=1 SV=1 - [PSA4_RAT]	0	2.97907e+06					4.08227	3.45	1	2	261	29.4792	7.72314
P34064	Proteasome subunit alpha type-5 OS=Rattus norvegicus GN=Psma5 PE=2 SV=1 - [PSA5_RAT]	0	2.27744e+06					4.089	7.05	2	2	241	26.3742	4.85596
P40307	Proteasome subunit beta type-2 OS=Rattus norvegicus GN=Psmb2 PE=1 SV=1 - [PSB2_RAT]	0	1.42303e+06					10.2529	11.44	2	4	201	22.8977	7.44482
Q4KLH4	Paraspeckle component 1 OS=Rattus norvegicus GN=Pspc1 PE=2 SV=1 - [PSPC1_RAT]	0	0					1.72261	1.53	1	1	522	58.7222	6.66846
P0C089	Phosphatidylglycerophosphatase and protein-tyrosine phosphatase 1 OS=Rattus norvegicus GN=Ptpmt1 PE=2 SV=1 - [PTPM1_RAT]	0	1.03568e+06					1.63529	4.15	1	2	193	21.8725	9.5835
O35141	Ras association domain-containing protein 5 OS=Rattus norvegicus GN=Rassf5 PE=1 SV=1 - [RASF5_RAT]	0	1.60819e+06					0	5.08	1	3	413	46.6503	9.21729
P70501	RNA-binding protein 10 OS=Rattus norvegicus GN=Rbm10 PE=2 SV=1 - [RBM10_RAT]	0	3.0525e+06					2.28149	2	1	1	852	94.3302	6.72705
Q4KMA2	UV excision repair protein RAD23 homolog B OS=Rattus norvegicus GN=Rad23b PE=1 SV=1 - [RD23B_RAT]	0	606786					0	2.41	1	1	415	43.4698	4.83057
P62282	40S ribosomal protein S11 OS=Rattus norvegicus GN=Rps11 PE=1 SV=3 - [RS11_RAT]	0	1.0228e+06					1.81856	5.06	1	2	158	18.419	10.3013
Q80WK7	Equilibrative nucleoside transporter 3 OS=Rattus norvegicus GN=Slc29a3 PE=1 SV=2 - [S29A3_RAT]	0	2.83276e+06					1.71921	3.79	1	1	475	51.6429	8.1626
P08635	S-acyl fatty acid synthase thioesterase, medium chain OS=Rattus norvegicus GN=Olah PE=1 SV=1 - [SAST_RAT]	0	1.01386e+07					1.7292	3.8	1	2	263	29.4522	6.22705
Q9WV48-5	Isoform 5 of SH3 and multiple ankyrin repeat domains protein 1 OS=Rattus norvegicus GN=Shank1 - [SHAN1_RAT]	0	540654					0	0.36	1	1	1943	202.794	8.27979
Q6AYE2	Endophilin-B1 OS=Rattus norvegicus GN=Sh3glb1 PE=2 SV=1 - [SHLB1_RAT]	0	382200					2.43649	3.56	1	1	365	40.7618	6.03662
Q6P6S4	Nucleotide exchange factor SIL1 OS=Rattus norvegicus GN=Sil1 PE=2 SV=1 - [SIL1_RAT]	0	306325					2.25755	2.58	1	1	465	52.317	5.13525
Q5RJQ4	NAD-dependent protein deacetylase sirtuin-2 OS=Rattus norvegicus GN=Sirt2 PE=1 SV=1 - [SIR2_RAT]	0	0					6.02124	3.71	1	2	350	39.2938	7.07861
Q68FX9	NAD-dependent protein deacylase sirtuin-5, mitochondrial OS=Rattus norvegicus GN=Sirt5 PE=2 SV=1 - [SIR5_RAT]	0	482897					4.40149	7.42	2	2	310	34.0763	8.74854
P97690	Structural maintenance of chromosomes protein 3 OS=Rattus norvegicus GN=Smc3 PE=1 SV=1 - [SMC3_RAT]	0	0					0	1.01	1	1	1191	138.362	7.85498
Q56A18-2	Isoform 2 of SWI/SNF-related matrix-associated actin-dependent regulator of chromatin subfamily E member 1 OS=Rattus norvegicus GN=Smarce1 - [SMCE1_RAT]	0	883251					3.28514	4.23	1	1	307	35.2288	4.61475
D3Z9Z9	SWI/SNF-related matrix-associated actin-dependent regulator of chromatin subfamily A containing DEAD/H box 1 OS=Rattus norvegicus GN=Smarcad1 PE=3 SV=1 - [SMRCD_RAT]	0	0					0	0.98	1	1	1024	116.714	5.56689
Q6AYB5	Signal recognition particle 54 kDa protein OS=Rattus norvegicus GN=Srp54 PE=2 SV=1 - [SRP54_RAT]	0	2.62661e+06					14.589	9.52	5	8	504	55.6683	8.74854
O35814	Stress-induced-phosphoprotein 1 OS=Rattus norvegicus GN=Stip1 PE=1 SV=1 - [STIP1_RAT]	0	2.07359e+06					3.44198	2.39	1	1	543	62.5304	6.80029
P13668	Stathmin OS=Rattus norvegicus GN=Stmn1 PE=1 SV=2 - [STMN1_RAT]	0	441363					7.84394	15.44	2	4	149	17.2779	5.97314
P50235	Alcohol sulfotransferase OS=Rattus norvegicus PE=2 SV=1 - [SUH3_RAT]	0	0					1.78469	2.81	1	1	285	33.5089	7.82568
Q3KRD0	Aspartate--tRNA ligase, mitochondrial OS=Rattus norvegicus GN=Dars2 PE=2 SV=1 - [SYDM_RAT]	0	1.06181e+06					1.60069	1.38	1	1	652	73.9062	7.18115
O70441	Synapsin-3 OS=Rattus norvegicus GN=Syn3 PE=1 SV=1 - [SYN3_RAT]	0	734996					1.72149	2.07	1	1	579	63.3089	9.43701
Q5M7W7	Probable proline--tRNA ligase, mitochondrial OS=Rattus norvegicus GN=Pars2 PE=2 SV=1 - [SYPM_RAT]	0	0					4.53489	2.11	1	2	475	53.2982	7.82568
Q68FW7	Threonine--tRNA ligase, mitochondrial OS=Rattus norvegicus GN=Tars2 PE=2 SV=1 - [SYTM_RAT]	0	500754					4.3899	3.04	2	2	723	81.6208	7.86963
Q4KM49	Tyrosine--tRNA ligase, cytoplasmic OS=Rattus norvegicus GN=Yars PE=2 SV=3 - [SYYC_RAT]	0	860277					5.75488	4.92	3	4	528	59.078	7.00537
P37805	Transgelin-3 OS=Rattus norvegicus GN=Tagln3 PE=1 SV=2 - [TAGL3_RAT]	0	0					3.34549	4.02	1	2	199	22.4862	7.32764
P24155	Thimet oligopeptidase OS=Rattus norvegicus GN=Thop1 PE=1 SV=4 - [THOP1_RAT]	0	294912					1.87813	1.89	1	1	687	78.3354	5.93506
O08629	Transcription intermediary factor 1-beta OS=Rattus norvegicus GN=Trim28 PE=1 SV=2 - [TIF1B_RAT]	0	6661315					3.16291	2.04	1	2	835	88.8995	5.77002
Q6AYQ4	Transmembrane protein 109 OS=Rattus norvegicus GN=Tmem109 PE=2 SV=1 - [TM109_RAT]	0	2.63788e+06					2.76613	4.94	1	1	243	26.2254	9.77393
D4A615	Tonsoku-like protein OS=Rattus norvegicus GN=Tonsl PE=3 SV=1 - [TONSL_RAT]	0	3.62188e+06					0	0.59	1	1	1367	151.738	6.02393
D3ZQG6	Tripartite motif-containing protein 2 OS=Rattus norvegicus GN=Trim2 PE=1 SV=2 - [TRIM2_RAT]	0	547070					6.33279	1.48	1	3	744	81.3761	7.04932
P0C5X8	Protein tweety homolog 1 OS=Rattus norvegicus GN=Ttyh1 PE=2 SV=1 - [TTYH1_RAT]	0	157396					2.75451	2.89	1	1	450	49.0011	4.98291
Q5FVL0	V-type proton ATPase subunit d 2 OS=Rattus norvegicus GN=Atp6v0d2 PE=2 SV=1 - [VA0D2_RAT]	0	0					0	2.57	1	2	350	40.4933	5.40186
Q80W92	Protein VAC14 homolog OS=Rattus norvegicus GN=Vac14 PE=1 SV=1 - [VAC14_RAT]	0	0					1.79832	1.53	1	1	783	88.0116	6.12549
Q9Z269	Vesicle-associated membrane protein-associated protein B OS=Rattus norvegicus GN=Vapb PE=1 SV=3 - [VAPB_RAT]	0	2.52883e+06					5.86188	4.94	1	2	243	26.899	7.78174
Q01827	Synaptic vesicular amine transporter OS=Rattus norvegicus GN=Slc18a2 PE=1 SV=2 - [VMAT2_RAT]	0	311559					0	2.33	1	1	515	55.6528	6.62451
Q6AY86	Vacuolar protein sorting-associated protein 26A OS=Rattus norvegicus GN=Vps26a PE=2 SV=1 - [VP26A_RAT]	0	711027					4.24957	5.5	1	1	327	38.0907	6.56592
P04276	Vitamin D-binding protein OS=Rattus norvegicus GN=Gc PE=1 SV=3 - [VTDB_RAT]	0	741857					1.77309	1.89	1	1	476	53.509	5.85889
Q5BJU7	Wiskott-Aldrich syndrome protein family member 1 OS=Rattus norvegicus GN=Wasf1 PE=2 SV=1 - [WASF1_RAT]	0	2.1951e+06					5.59189	1.97	1	2	559	61.4768	6.3667
Q9ERH3-2	Isoform 2 of WD repeat-containing protein 7 OS=Rattus norvegicus GN=Wdr7 - [WDR7_RAT]	0	752413					9.16723	0.89	1	3	1457	160.091	7.00537
Q5FVN8	WD repeat, SAM and U-box domain-containing protein 1 OS=Rattus norvegicus GN=Wdsub1 PE=2 SV=1 - [WSDU1_RAT]	0	0					0	1.26	1	1	476	52.2108	6.44287
O54975	Xaa-Pro aminopeptidase 1 OS=Rattus norvegicus GN=Xpnpep1 PE=1 SV=1 - [XPP1_RAT]	0	459630					1.72977	4.65	2	2	623	69.6131	5.60498
Q7TSX9	Zygote arrest protein 1 OS=Rattus norvegicus GN=Zar1 PE=2 SV=1 - [ZAR1_RAT]	0	623855					0	2.49	1	1	361	40.3316	8.70459
Q5U2Z0	Zinc finger protein 367 OS=Rattus norvegicus GN=Znf367 PE=2 SV=1 - [ZN367_RAT]	0	9.49673e+06					1.6556	2.35	1	1	340	37.4487	7.51807
D4ACF2	Protein Trim21 OS=Rattus norvegicus GN=Trim21 PE=4 SV=2 - [D4ACF2_RAT]	0	1.90673e+06					27.5246	12.74	4	8	471	54.0918	6.69775
Q6DGF2	Enthoprotin OS=Rattus norvegicus GN=Clint1 PE=2 SV=1 - [Q6DGF2_RAT]	0	1.66942e+06					2.38235	2.33	1	1	472	52.1075	6.25244
B2RYE3	Bnipl protein OS=Rattus norvegicus GN=Bnipl PE=2 SV=1 - [B2RYE3_RAT]	0	0					1.60758	5.06	1	1	356	39.4147	5.21143
D4A2D7	Importin 4 (Predicted), isoform CRA_b OS=Rattus norvegicus GN=Ipo4 PE=2 SV=2 - [D4A2D7_RAT]	0	403489					4.30848	1.48	1	1	1081	118.85	5.021
G3V7T6	Protein Sf3b1 OS=Rattus norvegicus GN=Sf3b1 PE=4 SV=1 - [G3V7T6_RAT]	0	773604					4.16639	2.61	3	3	1304	145.738	7.09326
M0RAT5	Protein LOC100359967 OS=Rattus norvegicus GN=LOC100359967 PE=4 SV=1 - [M0RAT5_RAT]	0	0					0	1.74	1	1	749	84.9188	8.1626
D3ZVS2	L-2-hydroxyglutarate dehydrogenase (Predicted) OS=Rattus norvegicus GN=L2hgdh PE=4 SV=1 - [D3ZVS2_RAT]	0	636592					5.71002	3.24	1	2	463	50.7005	8.48486
F2Z3S7	Homeobox protein OTX2 OS=Rattus norvegicus GN=Otx2 PE=3 SV=2 - [F2Z3S7_RAT]	0	451964					1.90791	5.19	1	1	289	31.6164	9.31982
B1WC80	Protein RGD1563692 OS=Rattus norvegicus GN=RGD1563692 PE=2 SV=1 - [B1WC80_RAT]	0	865297					1.86672	2.21	1	1	452	50.3681	6.52197
G3V9P0	26S proteasome non-ATPase regulatory subunit 9 OS=Rattus norvegicus GN=Psmd9 PE=4 SV=1 - [G3V9P0_RAT]	0	1.11762e+06					4.63968	4.5	1	2	222	24.7996	6.88818
D3ZD73	Protein Ddx6 OS=Rattus norvegicus GN=Ddx6 PE=3 SV=1 - [D3ZD73_RAT]	0	931471					2.22497	2.07	1	1	483	54.2102	8.66064
D3ZMQ9	Protein Hltf OS=Rattus norvegicus GN=Hltf PE=4 SV=1 - [D3ZMQ9_RAT]	0	0					0	2.16	1	1	974	109.972	7.81104
Q5XI19	Fermitin family homolog 2 (Drosophila) OS=Rattus norvegicus GN=Fermt2 PE=2 SV=1 - [Q5XI19_RAT]	0	697422					10.201	2.94	2	5	680	77.8255	6.69775
D4A060	Protein Snx30 OS=Rattus norvegicus GN=Snx30 PE=4 SV=2 - [D4A060_RAT]	0	801603					3.27679	2.52	1	2	437	49.4452	5.35107
B1WC56	Nola2 protein OS=Rattus norvegicus GN=Nhp2 PE=2 SV=1 - [B1WC56_RAT]	0	209598					2.52487	11.11	1	1	153	17.281	7.97217
B0K014	D-tyrosyl-tRNA(Tyr) deacylase OS=Rattus norvegicus GN=Dtd1 PE=2 SV=1 - [B0K014_RAT]	0	918101					9.33536	17.22	3	4	209	23.3799	7.86963
G3V6R7	3-oxoacyl-[acyl-carrier-protein] synthase, mitochondrial OS=Rattus norvegicus GN=Oxsm PE=3 SV=1 - [G3V6R7_RAT]	0	992109					6.53242	8.11	2	3	456	47.9742	7.34229
M0R7U6	Protein Sowahc OS=Rattus norvegicus GN=Sowahc PE=4 SV=1 - [M0R7U6_RAT]	0	356192					0	3.88	1	1	516	55.0667	6.90283
D4A7R3	Nucleoporin 205kDa (Predicted) OS=Rattus norvegicus GN=Nup205 PE=4 SV=1 - [D4A7R3_RAT]	0	383397					2.88974	0.75	1	1	2008	227.086	6.31592
G3V6A8	Golgi autoantigen, golgin subfamily b, macrogolgin 1, isoform CRA_c OS=Rattus norvegicus GN=Golgb1 PE=4 SV=1 - [G3V6A8_RAT]	0	7.59257e+06					0	0.28	1	1	3187	364.03	5.07178
G3V6X7	Proprotein convertase subtilisin/kexin type 1 inhibitor OS=Rattus norvegicus GN=Pcsk1n PE=4 SV=1 - [G3V6X7_RAT]	0	578738					5.92348	4.62	1	2	260	27.4558	5.59229
Q642B0	Glypican 4 OS=Rattus norvegicus GN=Gpc4 PE=2 SV=1 - [Q642B0_RAT]	0	803631					3.53503	2.87	1	1	557	62.5217	5.99854
D4A3E0	Protein Mmrn1 OS=Rattus norvegicus GN=Mmrn1 PE=4 SV=1 - [D4A3E0_RAT]	0	1.90672e+06					1.78815	1.07	1	1	1210	135.518	7.51807
M0R629	Protein Adssl1 OS=Rattus norvegicus GN=Adssl1 PE=4 SV=1 - [M0R629_RAT]	0	495857					4.70392	5.25	2	2	457	50.2191	8.42627
G3V8M5	Serine/threonine-protein phosphatase OS=Rattus norvegicus GN=Ppp4c PE=3 SV=1 - [G3V8M5_RAT]	0	230462					2.47485	4.23	1	1	307	35.0574	5.05908
D4AD08	Chromodomain helicase DNA binding protein 2 (Predicted) OS=Rattus norvegicus GN=Chd2 PE=4 SV=1 - [D4AD08_RAT]	0	1.83682e+06					0	0.38	1	1	1834	211.546	8.00146
D4A857	Importin 9 (Predicted) OS=Rattus norvegicus GN=Ipo9 PE=4 SV=2 - [D4A857_RAT]	0	7.99063e+06					2.58531	0.86	1	1	1041	115.938	4.80518
F1LU70	G patch domain containing 1 (Predicted), isoform CRA_a OS=Rattus norvegicus GN=Gpatch1 PE=2 SV=2 - [F1LU70_RAT]	0	3.07392e+06					1.80201	1.61	1	1	930	103.14	7.40088
F8WG25	Protein LOC100361829 OS=Rattus norvegicus GN=LOC100361829 PE=4 SV=1 - [F8WG25_RAT]	0	0					0	1.86	1	3	269	29.4929	6.53662
D4A6K9	Active BCR-related gene (Predicted) OS=Rattus norvegicus GN=Abr PE=4 SV=1 - [D4A6K9_RAT]	0	360882					2.90888	1.51	1	1	859	97.6312	6.58057
D4AC65	Protein Selrc1 OS=Rattus norvegicus GN=Selrc1 PE=4 SV=1 - [D4AC65_RAT]	0	385923					0	4.76	1	1	231	25.6941	6.07471
Q4QQS7	Protein Umps OS=Rattus norvegicus GN=Umps PE=2 SV=1 - [Q4QQS7_RAT]	0	821324					2.08794	2.49	1	1	481	52.3454	6.48096
G3V6C4	UDP-glucose 6-dehydrogenase OS=Rattus norvegicus GN=Ugdh PE=3 SV=1 - [G3V6C4_RAT]	0	658473					3.66089	2.03	1	2	493	54.8523	7.34229
B5DFD1	NudC domain containing 1 OS=Rattus norvegicus GN=Nudcd1 PE=2 SV=1 - [B5DFD1_RAT]	0	2.34757e+06					2.21712	2.93	2	2	580	66.3262	5.42725
F1LQY6	EF hand calcium binding protein 2 OS=Rattus norvegicus GN=Necab2 PE=4 SV=2 - [F1LQY6_RAT]	0	718506					7.43392	3.98	1	2	352	39.4236	4.83057
Q568Z8	Ddx17 protein OS=Rattus norvegicus GN=Ddx17 PE=2 SV=1 - [Q568Z8_RAT]	0	401768					3.60376	5.22	1	1	268	28.8588	9.02686
D3ZAZ0	Protein Eif3m OS=Rattus norvegicus GN=Eif3m PE=4 SV=1 - [D3ZAZ0_RAT]	0	1.32627e+06					1.85096	2.67	1	1	374	42.4899	5.74463
Q0ZFS8	Protein LOC100910660 OS=Rattus norvegicus GN=Srsf3 PE=2 SV=1 - [Q0ZFS8_RAT]	0	306155					4.59144	15.85	2	4	164	19.3179	11.6489
F7ESM5	Nitrilase 1, isoform CRA_a OS=Rattus norvegicus GN=Nit1 PE=4 SV=1 - [F7ESM5_RAT]	0	994248					3.14579	3.78	1	1	291	32.0129	6.3667
B2RYN6	Adaptor-related protein complex 1, gamma 1 subunit, isoform CRA_b OS=Rattus norvegicus GN=Ap1g1 PE=1 SV=1 - [B2RYN6_RAT]	0	770410					6.42659	3.53	3	5	822	91.2921	6.80029
D3ZSU3	Protein Slc7a14 OS=Rattus norvegicus GN=Slc7a14 PE=4 SV=2 - [D3ZSU3_RAT]	0	160130					1.96862	2.67	1	1	412	45.9451	5.13525
Q4QQV4	Dead end homolog 1 (Zebrafish) OS=Rattus norvegicus GN=Hars PE=2 SV=1 - [Q4QQV4_RAT]	0	1.39303e+06					12.3078	6.89	3	4	508	57.3241	6.11279
Q498D8	Protein Rbx1 OS=Rattus norvegicus GN=Rbx1 PE=4 SV=1 - [Q498D8_RAT]	0	3.88749e+06					1.74141	7.41	1	1	108	12.2657	6.96143
D3ZES2	Protein Trappc6b OS=Rattus norvegicus GN=Trappc6b PE=4 SV=1 - [D3ZES2_RAT]	0	0					1.80273	5.06	1	2	158	17.9653	8.67529
G3V9Z4	Putative L-aspartate dehydrogenase OS=Rattus norvegicus GN=Aspdh PE=4 SV=1 - [G3V9Z4_RAT]	0	0					1.85612	3.83	1	1	287	30.3697	6.84424
Q5RKH5	Phosphorylase kinase, beta OS=Rattus norvegicus GN=Phkb PE=2 SV=1 - [Q5RKH5_RAT]	0	7.2217e+06					0	0.73	1	1	1100	125.807	6.97607
F1LVL4	Uncharacterized protein OS=Rattus norvegicus GN=LOC100363935 PE=4 SV=2 - [F1LVL4_RAT]	0	0					2.24136	15.13	1	1	119	13.0783	5.24951
D4A0E8	Protein Prmt5 OS=Rattus norvegicus GN=Prmt5 PE=4 SV=1 - [D4A0E8_RAT]	0	782624					4.2745	4.4	3	3	637	72.6485	6.26514
D3ZY17	Protein Rps6ka5 OS=Rattus norvegicus GN=Rps6ka5 PE=4 SV=1 - [D3ZY17_RAT]	0	644192					2.26379	1.93	1	1	518	58.2221	7.43018
F1LPI5	Laminin, beta 3, isoform CRA_a OS=Rattus norvegicus GN=Lamb3 PE=2 SV=2 - [F1LPI5_RAT]	0	660854					0	1.19	1	1	1172	129.03	7.28369
D3ZCQ9	Myeloid leukemia factor 1 (Predicted), isoform CRA_a OS=Rattus norvegicus GN=Mlf1 PE=4 SV=1 - [D3ZCQ9_RAT]	0	1.53768e+07					1.984	3.19	1	1	282	32.1998	9.15869
D3ZA68	Progressive external ophthalmoplegia 1 homolog (Human) (Predicted) OS=Rattus norvegicus GN=Peo1 PE=4 SV=1 - [D3ZA68_RAT]	0	1.15035e+06					0	2.05	1	1	683	76.842	9.08545
D4A1J1	Protein Arhgef3 OS=Rattus norvegicus GN=Arhgef3 PE=4 SV=1 - [D4A1J1_RAT]	0	2.99921e+06					1.72759	1.34	1	2	524	59.6083	6.25244
M0R8P7	Protein LOC503413 (Fragment) OS=Rattus norvegicus GN=LOC503413 PE=4 SV=1 - [M0R8P7_RAT]	0	0					2.08675	5	1	1	220	25.1291	6.15088
D3ZA38	Myosin binding protein C, fast-type (Predicted) OS=Rattus norvegicus GN=Mybpc2 PE=4 SV=1 - [D3ZA38_RAT]	0	1.45739e+06					0	0.69	1	1	1153	128.855	6.50732
D3ZYN8	Protein Ranbp17 OS=Rattus norvegicus GN=Ranbp17 PE=4 SV=1 - [D3ZYN8_RAT]	0	184272					0	1.47	1	1	1088	124.117	6.46826
B2RYI2	Protein Srp68 OS=Rattus norvegicus GN=Srp68 PE=2 SV=1 - [B2RYI2_RAT]	0	620012					8.97884	2.08	1	3	625	70.4483	8.57275
D3ZK47	Protein Whsc1l1 OS=Rattus norvegicus GN=Whsc1l1 PE=4 SV=1 - [D3ZK47_RAT]	0	962669					4.31091	0.93	1	2	1396	155.468	8.22119
D4A304	Protein Diras1 OS=Rattus norvegicus GN=Diras1 PE=4 SV=1 - [D4A304_RAT]	0	1.02089e+06					1.62186	5.56	1	1	198	22.2775	8.89502
B2RYI5	Ankrd40 protein OS=Rattus norvegicus GN=Ankrd40 PE=2 SV=1 - [B2RYI5_RAT]	0	0					2.04935	3.03	1	1	363	40.4647	5.09717
D4A511	Signal recognition particle 9 kDa protein OS=Rattus norvegicus GN=Srp9 PE=3 SV=1 - [D4A511_RAT]	0	1.1462e+06					2.87817	12.79	1	1	86	10.1302	7.98682
A0JN28	Leucine rich repeat containing 52 OS=Rattus norvegicus GN=Lrrc52 PE=2 SV=1 - [A0JN28_RAT]	0	404246					1.6472	2.23	1	1	314	35.3818	6.50732
Q68FW0	Protein Rassf1 OS=Rattus norvegicus GN=Rassf1 PE=2 SV=1 - [Q68FW0_RAT]	0	1.73121e+06					0	2.96	1	1	270	31.208	8.73389
B1WC52	Protein Traip OS=Rattus norvegicus GN=Traip PE=2 SV=1 - [B1WC52_RAT]	0	388698					1.72006	1.71	1	1	469	53.0115	8.67529
G3V7T3	Pantothenate kinase 4 OS=Rattus norvegicus GN=Pank4 PE=4 SV=1 - [G3V7T3_RAT]	0	328915					1.7398	1.42	1	2	773	86.1341	6.31592
Q3KRC3	Protein Srpr OS=Rattus norvegicus GN=Srpr PE=2 SV=1 - [Q3KRC3_RAT]	0	0					0	1.42	1	1	636	69.6132	8.95361
Q499Q2	Protein Tpd52l1 OS=Rattus norvegicus GN=Tpd52l1 PE=2 SV=1 - [Q499Q2_RAT]	0	1.19872e+06					3.18585	8.59	1	1	163	18.3362	6.40479
Q99MI5	Protein LOC100364487 OS=Rattus norvegicus GN=Srm PE=2 SV=1 - [Q99MI5_RAT]	0	1.28666e+06					2.53148	4.3	1	1	302	33.9748	5.64307
D3ZER6	Protein Tnpo2 OS=Rattus norvegicus GN=Tnpo2 PE=4 SV=2 - [D3ZER6_RAT]	0	6.74698e+06					2.07647	0.99	1	1	913	102.81	4.99561
D4ADD8	Dynactin 6 (Predicted), isoform CRA_b OS=Rattus norvegicus GN=Dctn6 PE=4 SV=1 - [D4ADD8_RAT]	0	175065					2.02761	5.26	1	1	190	20.6526	6.66846
D4A8D5	Filamin, beta (Predicted) OS=Rattus norvegicus GN=Flnb PE=4 SV=1 - [D4A8D5_RAT]	0	0					0	0.54	1	1	2578	275.144	5.73193
D3ZB67	Olfactory receptor 392 (Predicted) OS=Rattus norvegicus GN=Olr392 PE=3 SV=1 - [D3ZB67_RAT]	0	0					2.22338	5.7	1	2	316	35.4294	8.19189
Q66HF3	Electron transfer flavoprotein-ubiquinone oxidoreductase, mitochondrial OS=Rattus norvegicus GN=Etfdh PE=2 SV=1 - [Q66HF3_RAT]	0	1.13125e+06					2.60272	1.95	1	1	616	68.1207	7.56201
Q499V1	Protein Upp1 OS=Rattus norvegicus GN=Upp1 PE=2 SV=1 - [Q499V1_RAT]	0	949551					0	2.56	1	1	312	34.0919	6.72705
B2RYJ1	Anapc2 protein OS=Rattus norvegicus GN=Anapc2 PE=2 SV=1 - [B2RYJ1_RAT]	0	2.11922e+06					0	0.72	1	1	836	95.3128	5.2876
D4A5G2	Protein Nop14 OS=Rattus norvegicus GN=Nop14 PE=4 SV=1 - [D4A5G2_RAT]	0	0					0	0.94	1	1	640	72.8308	5.75732
B5DFB2	Protein Rbbp4 OS=Rattus norvegicus GN=Rbbp4 PE=2 SV=1 - [B5DFB2_RAT]	0	3.31318e+06					2.89741	3.06	1	1	425	47.6261	4.89404
E9PTR4	Protein Ubap2l OS=Rattus norvegicus GN=Ubap2l PE=2 SV=2 - [E9PTR4_RAT]	0	682262					2.99892	1.36	1	1	1105	116.791	6.53662
B0BND9	Protein LOC100910272 OS=Rattus norvegicus GN=Srp72 PE=2 SV=1 - [B0BND9_RAT]	0	314283					4.11575	7.59	1	1	224	24.5939	9.92041
D3ZJ66	Neuronal PAS domain protein 1 (Predicted) OS=Rattus norvegicus GN=Npas1 PE=4 SV=1 - [D3ZJ66_RAT]	0	1.61004e+06					0	1.18	1	1	595	63.9383	8.89502
D4A746	GDP-mannose pyrophosphorylase B (Predicted), isoform CRA_a OS=Rattus norvegicus GN=Gmppb PE=4 SV=1 - [D4A746_RAT]	0	1.23738e+06					2.7924	3.06	1	1	360	39.8766	6.7417
G3V640	Mitochondrial import inner membrane translocase subunit TIM44 OS=Rattus norvegicus GN=Timm44 PE=4 SV=1 - [G3V640_RAT]	0	328080					4.42663	2.87	1	2	453	51.0284	8.30908
D4A2B0	Polymerase (DNA-directed), delta interacting protein 3 (Predicted), isoform CRA_a OS=Rattus norvegicus GN=Poldip3 PE=4 SV=1 - [D4A2B0_RAT]	0	1.48585e+06					6.79414	3.33	1	2	420	46.2928	10.0522
B0BN82	Brix domain containing 1 OS=Rattus norvegicus GN=Rpf2 PE=2 SV=1 - [B0BN82_RAT]	0	0					1.78793	6.21	1	1	306	35.2341	10.0229
B1H248	Vacuolar protein-sorting-associated protein 36 OS=Rattus norvegicus GN=Vps36 PE=2 SV=1 - [B1H248_RAT]	0	165223					0	2.85	1	1	386	43.6897	7.45947
D3ZVD0	F-box and leucine-rich repeat protein 17 (Predicted) OS=Rattus norvegicus GN=Fbxl17 PE=4 SV=1 - [D3ZVD0_RAT]	0	1.32237e+07					1.87416	2.31	1	1	303	33.9542	7.91357
Q9JKT0	SH3-domain GRB2-like 3 OS=Rattus norvegicus GN=Sh3gl3 PE=2 SV=1 - [Q9JKT0_RAT]	0	916702					2.01804	2.88	1	1	312	35.292	5.03369
D4A5J1	Protein Kbtbd11 OS=Rattus norvegicus GN=Kbtbd11 PE=4 SV=1 - [D4A5J1_RAT]	0	830606					0	2.37	1	1	633	67.8064	5.33838
G3V6S7	Interleukin 5 receptor, alpha OS=Rattus norvegicus GN=Il5ra PE=4 SV=1 - [G3V6S7_RAT]	0	458186					5.29514	3.14	1	3	414	46.99	7.12256
D4A8H8	Cytoplasmic FMR1 interacting protein 1 (Predicted) OS=Rattus norvegicus GN=Cyfip1 PE=4 SV=1 - [D4A8H8_RAT]	0	1.18357e+07					0	0.72	1	1	1253	145.164	6.90283
D4A0L1	MON1 homolog b (Yeast) (Predicted), isoform CRA_b OS=Rattus norvegicus GN=Mon1b PE=4 SV=1 - [D4A0L1_RAT]	0	669797					0	2.05	1	1	438	47.992	6.41748
Q5U205	Protein Stard3nl OS=Rattus norvegicus GN=Stard3nl PE=2 SV=1 - [Q5U205_RAT]	0	0					2.283	4.26	1	1	235	26.7018	4.89404
B0BN46	Grhpr protein OS=Rattus norvegicus GN=Grhpr PE=2 SV=1 - [B0BN46_RAT]	0	1.39716e+06					2.00332	3.58	1	1	335	35.9148	7.92822
D4ACJ7	Uncharacterized protein OS=Rattus norvegicus PE=4 SV=2 - [D4ACJ7_RAT]	0	264612					4.69083	7.06	1	1	255	26.7116	9.90576
Q5RK25	Phosphomannomutase 1 OS=Rattus norvegicus GN=Pmm1 PE=2 SV=1 - [Q5RK25_RAT]	0	0					1.66185	4.96	1	1	262	29.67	5.59229
Q6MG85	1-acylglycerol-3-phosphate O-acyltransferase 1 (Lysophosphatidic acid acyltransferase, alpha) OS=Rattus norvegicus GN=Agpat1 PE=2 SV=1 - [Q6MG85_RAT]	0	717717					0	3.17	1	1	284	31.6777	9.15869
D4A3K7	Protein Frmpd4 OS=Rattus norvegicus GN=Frmpd4 PE=4 SV=1 - [D4A3K7_RAT]	0	0					0	0.7	1	1	1705	186.975	5.33838
Q5FVC4	DnaJ (Hsp40) homolog, subfamily B, member 12 OS=Rattus norvegicus GN=Dnajb12 PE=2 SV=1 - [Q5FVC4_RAT]	0	256926					0	5.03	1	1	378	42.495	8.49951
B2RYV3	LOC100174910 protein OS=Rattus norvegicus GN=LOC100174910 PE=4 SV=1 - [B2RYV3_RAT]	0	1.60585e+06					1.79232	7.29	1	1	96	11.2089	8.54346
B2RYW7	Protein Srp14 OS=Rattus norvegicus GN=Srp14 PE=4 SV=1 - [B2RYW7_RAT]	0	830929					5.68995	10.91	1	2	110	12.5018	10.1694
Q6IRG7	Claudin 11 OS=Rattus norvegicus GN=Cldn11 PE=2 SV=1 - [Q6IRG7_RAT]	0	695034					2.01467	6.76	1	1	207	22.0993	7.91357
D4A5F1	Protein Pkd2 OS=Rattus norvegicus GN=Pkd2 PE=4 SV=1 - [D4A5F1_RAT]	0	1.26435e+06					1.65923	0.72	1	1	966	109.025	5.60498
M0R8C8	Protein Olr845 OS=Rattus norvegicus GN=Olr845 PE=4 SV=1 - [M0R8C8_RAT]	0	321518					2.60662	5.99	1	2	317	35.1163	9.1001
M0R961	Far upstream element-binding protein 2 OS=Rattus norvegicus GN=Khsrp PE=4 SV=1 - [M0R961_RAT]	0	611627					2.66611	1.8	1	1	721	74.1665	6.96143
B5DF95	Family with sequence similarity 164, member A OS=Rattus norvegicus GN=Fam164a PE=2 SV=1 - [B5DF95_RAT]	0	469139					1.67778	3.7	1	1	324	35.187	9.86182
B1WBZ6	Protein RGD1565685 OS=Rattus norvegicus GN=RGD1565685 PE=2 SV=1 - [B1WBZ6_RAT]	0	1.10023e+06					1.89879	2.19	1	1	320	36.6845	6.32861
D4A6X7	Protein Ppcs OS=Rattus norvegicus GN=Ppcs PE=4 SV=1 - [D4A6X7_RAT]	0	0					1.92316	3.22	1	1	311	33.8867	6.81494
F1LVJ7	Protein Dppa5 (Fragment) OS=Rattus norvegicus GN=RGD1559995 PE=4 SV=1 - [F1LVJ7_RAT]	0	0					0	7.69	1	1	117	13.5591	8.83643
Q9QX19	Postsynaptic density protein OS=Rattus norvegicus GN=Cit PE=2 SV=1 - [Q9QX19_RAT]	0	1.77081e+07					0	0.43	1	1	1618	185.81	6.63916
B5DF46	Phosphomannomutase 2 OS=Rattus norvegicus GN=Pmm2 PE=2 SV=1 - [B5DF46_RAT]	0	0					0	8.68	1	1	242	27.6911	7.29834
Q3B8N9	Biphenyl hydrolase-like (Serine hydrolase) OS=Rattus norvegicus GN=Bphl PE=2 SV=1 - [Q3B8N9_RAT]	0	798447					2.3356	4.12	1	1	291	32.8021	8.79248
Q4QQS6	Asparagine-linked glycosylation 5 homolog (Yeast, dolichyl-phosphate beta-glucosyltransferase), isoform CRA_a OS=Rattus norvegicus GN=Alg5 PE=2 SV=1 - [Q4QQS6_RAT]	0	749807					2.23033	2.47	1	1	324	36.8333	8.646
Q4V8J5	DNA-damage inducible protein 2 OS=Rattus norvegicus GN=Ddi2 PE=2 SV=1 - [Q4V8J5_RAT]	0	564929					1.63861	4.68	1	1	299	33.4861	5.45264
G3V7H8	Human immunodeficiency virus type I enhancer-binding protein 2 homolog OS=Rattus norvegicus GN=Hivep2 PE=4 SV=1 - [G3V7H8_RAT]	0	0					0	0.57	1	1	2437	267.237	6.97607
B2RYJ3	Protein Cul4a OS=Rattus norvegicus GN=RGD1563853 PE=2 SV=1 - [B2RYJ3_RAT]	0	371115					2.08732	1.58	1	1	759	87.7185	8.35303
G3V644	NADH dehydrogenase (Ubiquinone) flavoprotein 3-like, isoform CRA_a OS=Rattus norvegicus GN=Ndufv3 PE=4 SV=1 - [G3V644_RAT]	0	667181					7.61966	5.9	1	3	458	49.2702	8.83643
D4A3N5	Protein Zfp775 OS=Rattus norvegicus GN=Zfp775 PE=4 SV=1 - [D4A3N5_RAT]	0	5.68871e+06					0	5.93	1	1	540	61.1205	9.84717
D3ZVJ3	Kinetochore associated 1 (Predicted) OS=Rattus norvegicus GN=Kntc1 PE=2 SV=2 - [D3ZVJ3_RAT]	0	293826					0	1.22	1	1	2050	233.097	5.70654
G3V851	Solute carrier family 17 (Sodium-dependent inorganic phosphate cotransporter), member 6 OS=Rattus norvegicus GN=Slc17a6 PE=4 SV=1 - [G3V851_RAT]	0	1.69318e+06					1.8309	1.55	1	1	582	64.5177	6.82959
D3ZVU6	Protein Avl9 OS=Rattus norvegicus GN=Avl9 PE=4 SV=1 - [D3ZVU6_RAT]	0	1.12878e+06					2.5083	3.08	2	2	649	71.9624	6.18896
Q2KML4	Dynein axonemal heavy chain-like protein (Fragment) OS=Rattus norvegicus GN=Dnah2 PE=2 SV=1 - [Q2KML4_RAT]	0	0					1.99292	0.5	1	1	3965	455.622	6.15088
Q9R170	Branched-chain-amino-acid aminotransferase (Fragment) OS=Rattus norvegicus GN=Bcat1 PE=2 SV=1 - [Q9R170_RAT]	0	4.0231e+06					4.40923	2.21	1	2	362	40.7959	7.41553
Q9WUP8	Alpha 8 integrin (Fragment) OS=Rattus norvegicus GN=Itga8 PE=2 SV=1 - [Q9WUP8_RAT]	0	582318					1.67571	6.21	1	1	161	17.8657	10.0083
A0JN19	Nolc1 protein (Fragment) OS=Rattus norvegicus GN=Nolc1 PE=2 SV=1 - [A0JN19_RAT]	0	457212					0	3.12	1	1	321	33.4492	9.45166
B1WBS5	Slc5a10 protein OS=Rattus norvegicus GN=Slc5a10 PE=2 SV=1 - [B1WBS5_RAT]	0	0					2.0757	2.78	1	1	540	59.0556	8.11865
B2GUY6	Srrm2 protein (Fragment) OS=Rattus norvegicus GN=Srrm2 PE=2 SV=1 - [B2GUY6_RAT]	0	0					0	2.38	1	1	588	59.413	11.8394
D3ZMM4	ERC protein 2 OS=Rattus norvegicus GN=Erc2 PE=4 SV=2 - [D3ZMM4_RAT]	0	766384					0	1.14	1	1	703	80.6228	7.12256
D4A264	Protein Zadh2 OS=Rattus norvegicus GN=Zadh2 PE=4 SV=2 - [D4A264_RAT]	0	377722					2.17029	3.98	1	1	377	40.5101	7.76709
D3ZHZ8	Regulating synaptic membrane exocytosis protein 2 OS=Rattus norvegicus GN=Rims2 PE=2 SV=2 - [D3ZHZ8_RAT]	0	7.59027e+06					0	2.01	1	1	1044	120.072	9.31982
D3ZJI8	Protein Taf1 OS=Rattus norvegicus GN=Taf1 PE=2 SV=2 - [D3ZJI8_RAT]	0	2.42478e+06					0	0.37	1	1	1892	215.063	5.13525
D3ZFC6	Protein Itih4 OS=Rattus norvegicus GN=Itih4 PE=2 SV=2 - [D3ZFC6_RAT]	0	717617					3.60971	2.04	1	1	930	103.416	6.17627
D3ZXF9	Protein Mrpl12 OS=Rattus norvegicus GN=Mrpl12 PE=4 SV=1 - [D3ZXF9_RAT]	0	197293					2.29939	3.26	1	1	276	29.4229	9.65674
D4A8P9	Protein Iars2 OS=Rattus norvegicus GN=Iars2 PE=3 SV=2 - [D4A8P9_RAT]	0	685184					0	2.04	1	1	442	48.6503	7.35693
D3ZRC3	Uncharacterized protein OS=Rattus norvegicus PE=2 SV=1 - [D3ZRC3_RAT]	0	218455					0	1.22	1	1	983	110.903	9.0708
D3ZRD2	Protein Ccdc15 (Fragment) OS=Rattus norvegicus GN=Ccdc15 PE=4 SV=2 - [D3ZRD2_RAT]	0	2.69796e+07					1.63863	1.23	1	1	813	93.5124	7.47412
D3JTH7	IL2RG (Fragment) OS=Rattus norvegicus GN=Il2rg PE=2 SV=1 - [D3JTH7_RAT]	0	0					0	8.79	1	1	239	28.2353	8.23584
D4A509	Protein Atp8b2 OS=Rattus norvegicus GN=Atp8b2 PE=2 SV=2 - [D4A509_RAT]	0	1.4948e+06					1.79338	1.34	1	1	1190	134.702	7.09326
E9PT12	Protein RGD1562532 OS=Rattus norvegicus GN=RGD1562532 PE=4 SV=1 - [E9PT12_RAT]	0	7.32927e+06					0	1.36	1	2	441	50.5597	9.61279
E9PTQ8	Protein Rhox7 OS=Rattus norvegicus GN=Rhox7 PE=3 SV=2 - [E9PTQ8_RAT]	0	1.81001e+07					0	4.39	1	1	228	26.0275	9.86182
F1LX55	Protein Epha10 OS=Rattus norvegicus GN=Epha10 PE=4 SV=2 - [F1LX55_RAT]	0	172775					2.45497	1.98	1	1	1009	109.678	6.62451
F1LU14	Protein Snx32 OS=Rattus norvegicus GN=Snx32 PE=4 SV=2 - [F1LU14_RAT]	0	8.3195e+06					0	1.49	1	2	404	46.605	7.00537
F1LM24	Protein Kif1a OS=Rattus norvegicus GN=Kif1a PE=2 SV=2 - [F1LM24_RAT]	0	302809					1.75591	0.53	1	1	1697	191.653	6.22705
F1M0D2	Protein Fam124a OS=Rattus norvegicus GN=Fam124a PE=2 SV=2 - [F1M0D2_RAT]	0	635496					2.28434	3.17	1	1	536	58.7763	6.40479
F1M9G8	Histidine triad nucleotide-binding protein 3 OS=Rattus norvegicus GN=Hint3 PE=2 SV=1 - [F1M9G8_RAT]	0	741137					2.91045	8	1	1	175	19.7228	6.7124
F1M9N4	Protein Mbnl1 OS=Rattus norvegicus GN=Mbnl1 PE=2 SV=2 - [F1M9N4_RAT]	0	1.36234e+06					0	2.33	1	1	387	41.719	8.89502
G3V6U4	ELAV-like protein 2 OS=Rattus norvegicus GN=Elavl2 PE=4 SV=2 - [G3V6U4_RAT]	0	367643					1.67677	3.55	1	1	310	34.3158	9.53955
M0R6R8	Uncharacterized protein OS=Rattus norvegicus PE=4 SV=1 - [M0R6R8_RAT]	0	0					1.73168	1.44	1	1	974	110.099	6.21436
M0RCF4	Uncharacterized protein OS=Rattus norvegicus PE=4 SV=1 - [M0RCF4_RAT]	0	4.40331e+07					0	11.15	1	1	305	32.3743	9.05615
M0R8A7	Protein Secp43 OS=Rattus norvegicus GN=Secp43 PE=4 SV=1 - [M0R8A7_RAT]	0	1.98334e+06					0	12.1	1	1	248	27.9195	5.30029
M0RDR1	Enoyl-CoA hydratase domain-containing protein 3, mitochondrial (Fragment) OS=Rattus norvegicus GN=Echdc3 PE=4 SV=1 - [M0RDR1_RAT]	0	0					4.74413	7.47	1	2	174	18.6048	7.81104
F1M1X0	Protein Pkd1l1 (Fragment) OS=Rattus norvegicus GN=Pkd1l1 PE=4 SV=2 - [F1M1X0_RAT]	0	0					0	0.51	1	1	2529	280.811	7.02002
D3ZN27	Protein Dnajc13 OS=Rattus norvegicus GN=Dnajc13 PE=2 SV=2 - [D3ZN27_RAT]	0	2.42622e+06					0	0.36	1	1	2243	254.346	6.771
F1M077	Protein Wnt OS=Rattus norvegicus GN=Wnt3 PE=3 SV=2 - [F1M077_RAT]	0	0					0	3.41	1	1	352	39.2317	7.97217
F1LN45	Protein Trpm3 (Fragment) OS=Rattus norvegicus GN=Trpm3 PE=4 SV=1 - [F1LN45_RAT]	0	0					0	0.42	1	1	1660	189.183	7.2251
F1LMK8	Protein Jmjd1c OS=Rattus norvegicus GN=Jmjd1c PE=2 SV=2 - [F1LMK8_RAT]	0	0					0	0.51	1	1	2525	280.419	7.95752
G3V7H1	Rho GTPase-activating protein 7 OS=Rattus norvegicus GN=Dlc1 PE=4 SV=2 - [G3V7H1_RAT]	0	758140					1.68849	1.11	1	1	1083	122.367	7.73779
D3ZTA7	Protein Alpk1 OS=Rattus norvegicus GN=Alpk1 PE=4 SV=1 - [D3ZTA7_RAT]	0	0					0	1.22	1	1	1231	136.276	6.12549
B0BNK6	Branched chain keto acid dehydrogenase E1, beta polypeptide OS=Rattus norvegicus GN=Bckdhb PE=2 SV=1 - [B0BNK6_RAT]	0	1.83348e+06					4.92314	5.9	2	2	390	42.7538	6.82959
M0RDY6	Protein LOC100360726 OS=Rattus norvegicus GN=LOC100360726 PE=4 SV=1 - [M0RDY6_RAT]	0	2.1927e+06					0	0.67	1	1	1343	144.735	4.95752
Q63002	Mannose 6-phosphate/insulin-like growth factor II receptor OS=Rattus norvegicus GN=Igf2r PE=2 SV=1 - [Q63002_RAT]	0	4.03538e+06					1.6342	0.32	1	1	2479	273.222	5.68115
F1LQM9	Protein Xpo7 OS=Rattus norvegicus GN=Xpo7 PE=2 SV=2 - [F1LQM9_RAT]	0	711984					3.5839	0.83	1	2	1090	124.102	6.40479
F1LUV9	Neural cell adhesion molecule 1 (Fragment) OS=Rattus norvegicus GN=Ncam1 PE=2 SV=2 - [F1LUV9_RAT]	0	1.01242e+06					8.45389	2.86	2	3	838	92.254	4.90674
F1M335	Protein Pxdn OS=Rattus norvegicus GN=Pxdn PE=4 SV=2 - [F1M335_RAT]	0	2.11922e+06					0	0.41	1	1	1473	164.748	7.15186
F1LVL2	Protein Icoslg OS=Rattus norvegicus GN=Icoslg PE=4 SV=2 - [F1LVL2_RAT]	0	2.78588e+06					2.18182	3.92	1	1	332	37.7079	6.69775
B2RZ30	Sirt4 protein OS=Rattus norvegicus GN=Sirt4 PE=2 SV=1 - [B2RZ30_RAT]	0	0					0	7.07	1	1	283	32.1454	9.21729
D3ZBD8	SH3-containing GRB2-like protein 3-interacting protein 1 (Fragment) OS=Rattus norvegicus GN=Sgip1 PE=2 SV=2 - [D3ZBD8_RAT]	0	972197					2.47426	1.97	1	1	609	65.4576	8.80713
F1M8G8	Signal-induced proliferation-associated 1-like protein 2 OS=Rattus norvegicus GN=Sipa1l2 PE=2 SV=2 - [F1M8G8_RAT]	0	554250					0	0.35	1	1	1722	189.391	6.78564
F1M1D5	Protein Tbcd OS=Rattus norvegicus GN=Tbcd PE=4 SV=2 - [F1M1D5_RAT]	0	548049					2.53745	1.09	1	1	1192	133.02	6.26514
Q9ES32	Transcription factor A (Fragment) OS=Rattus norvegicus GN=Tfam PE=2 SV=1 - [Q9ES32_RAT]	0	4.35569e+06					1.91922	3.43	1	1	204	23.9086	9.74463
D3ZD79	Uncharacterized protein OS=Rattus norvegicus PE=2 SV=2 - [D3ZD79_RAT]	0	2.05755e+06					0	0.41	1	1	1691	184.355	5.90967
D3ZAN1	Type I inositol 3,4-bisphosphate 4-phosphatase OS=Rattus norvegicus GN=Inpp4a PE=2 SV=2 - [D3ZAN1_RAT]	0	2.05874e+06					2.3975	0.97	1	1	928	104.369	7.56201
F1LRQ3	Protein Rnf180 OS=Rattus norvegicus GN=Rnf180 PE=2 SV=2 - [F1LRQ3_RAT]	0	0					1.72518	1.74	1	1	576	65.3562	8.66064
F1LUD3	Protein Ahnak2 (Fragment) OS=Rattus norvegicus GN=Ahnak2 PE=4 SV=1 - [F1LUD3_RAT]	0	4.63772e+06					0	0.91	1	2	768	82.28	4.99561
F1LUI7	Protein Ankar OS=Rattus norvegicus GN=Ankar PE=4 SV=2 - [F1LUI7_RAT]	0	4050651					0	0.42	1	1	1427	161.215	8.1626
M0R5Z1	Uncharacterized protein (Fragment) OS=Rattus norvegicus PE=4 SV=1 - [M0R5Z1_RAT]	0	0					0	0.66	1	2	756	86.7233	7.59131
D3ZAP7	Protein Chd7 OS=Rattus norvegicus GN=Chd7 PE=4 SV=1 - [D3ZAP7_RAT]	0	918291					0	0.23	1	1	2985	333.654	6.354
F1M6Y5	Protein Rbbp6 OS=Rattus norvegicus GN=Rbbp6 PE=2 SV=1 - [F1M6Y5_RAT]	0	0					0	0.4	1	1	1755	195.453	9.61279
E9PTL8	Protein Mcpt8l3 OS=Rattus norvegicus GN=Mcpt8l3 PE=3 SV=1 - [E9PTL8_RAT]	0	14956882					2.04206	3.23	1	1	248	27.1227	8.104
M0RDZ6	Protein Lrriq1 OS=Rattus norvegicus GN=Lrriq1 PE=4 SV=1 - [M0RDZ6_RAT]	0	0					0	1.54	1	1	1554	178.362	5.49072
D4AB12	Uncharacterized protein OS=Rattus norvegicus PE=3 SV=1 - [D4AB12_RAT]	0	0					0	6.17	1	1	324	34.9913	7.40088
Q7TP06	Da1-6 OS=Rattus norvegicus GN=LOC307347 PE=2 SV=1 - [Q7TP06_RAT]	0	1.87249e+06					6.58671	0.76	1	3	2377	260.919	5.93506
M0R9E4	Uncharacterized protein OS=Rattus norvegicus PE=4 SV=1 - [M0R9E4_RAT]	0	0					1.71629	0.59	1	1	1015	115.718	8.04541
B1H263	RGD1307041 protein (Fragment) OS=Rattus norvegicus GN=RGD1307041 PE=2 SV=1 - [B1H263_RAT]	0	1.0538e+06					8.3057	3.02	1	3	398	45.9448	8.52881
F1LXT1	Uncharacterized protein (Fragment) OS=Rattus norvegicus GN=Pramef6 PE=4 SV=2 - [F1LXT1_RAT]	0	0					0	2.49	1	1	482	54.7403	7.84033
F1LP91	Glycogen synthase kinase-3 alpha OS=Rattus norvegicus GN=Gsk3a PE=2 SV=2 - [F1LP91_RAT]	0	622455					2.70227	3.05	1	1	459	48.4809	9.11475
D4AAN8	Protein Helb OS=Rattus norvegicus GN=Helb PE=4 SV=2 - [D4AAN8_RAT]	0	2.21905e+07					0	0.75	1	2	1071	120.573	6.45557
E9PTK4	Protein Thnsl1 OS=Rattus norvegicus GN=Thnsl1 PE=2 SV=1 - [E9PTK4_RAT]	0	0					1.69511	1.48	1	1	745	82.6572	7.1665
B2RYL9	Parvb protein (Fragment) OS=Rattus norvegicus GN=Parvb PE=2 SV=1 - [B2RYL9_RAT]	0	728160					8.08557	14.46	2	3	166	19.2279	9.75928
Q6AZ22	Wisp1 protein OS=Rattus norvegicus GN=Wisp1 PE=2 SV=1 - [Q6AZ22_RAT]	0	0					0	2.77	1	1	289	31.8602	7.84033
D3ZY40	Protein Pcf11 OS=Rattus norvegicus GN=Pcf11 PE=4 SV=1 - [D3ZY40_RAT]	0	0					0	0.52	1	1	1551	172.558	8.42627
M0R4L1	Uncharacterized protein (Fragment) OS=Rattus norvegicus PE=4 SV=1 - [M0R4L1_RAT]	0	1.14172e+06					0	3.4	1	1	706	77.915	5.32568
M0R9D0	Acidic leucine-rich nuclear phosphoprotein 32 family member A OS=Rattus norvegicus GN=Anp32a PE=4 SV=1 - [M0R9D0_RAT]	0	0					1.6262	3.27	1	1	245	28.2882	4.08154
D4A871	Protein Lmod3 OS=Rattus norvegicus GN=Lmod3 PE=4 SV=2 - [D4A871_RAT]	0	0					0	1.93	1	1	569	65.0396	5.30029
D4A0Y9	Protein Abcb1b OS=Rattus norvegicus GN=Abcb1b PE=2 SV=2 - [D4A0Y9_RAT]	0	2.17587e+06					0	0.87	1	1	924	102.388	8.23584
F1LPS8	Transcriptional activator protein Pur-alpha OS=Rattus norvegicus GN=Pura PE=2 SV=2 - [F1LPS8_RAT]	0	2.0903e+06					0	1.98	1	1	303	33.716	6.44287
D3ZJP9	Protein LOC680520 OS=Rattus norvegicus GN=LOC680520 PE=4 SV=1 - [D3ZJP9_RAT]	0	2.24557e+06					0	4.27	1	1	164	19.2849	8.76318
F1LTU7	Protein Gmnc (Fragment) OS=Rattus norvegicus GN=Gmnc PE=4 SV=1 - [F1LTU7_RAT]	0	0					0	2.67	1	1	337	38.1849	6.66846
F1LU03	Glyceraldehyde-3-phosphate dehydrogenase (Fragment) OS=Rattus norvegicus PE=3 SV=2 - [F1LU03_RAT]	0	1.42599e+06					1.86287	3.36	1	1	298	32.1394	7.47412
F1M164	Protein Dmxl2-ps1 (Fragment) OS=Rattus norvegicus GN=Dmxl2-ps1 PE=4 SV=2 - [F1M164_RAT]	0	423559					7.96549	0.68	1	3	2222	247.947	6.30322
E9PTB7	Uncharacterized protein OS=Rattus norvegicus PE=2 SV=2 - [E9PTB7_RAT]	0	5.4461e+06					0	0.66	1	1	1216	134.311	5.46533
D3ZNJ9	Protein Trim7 OS=Rattus norvegicus GN=Trim7 PE=4 SV=1 - [D3ZNJ9_RAT]	0	1.07019e+08					0	4.71	1	1	510	56.909	7.79639
F1LYC7	Protein Bcorl1 OS=Rattus norvegicus GN=Bcorl1 PE=2 SV=2 - [F1LYC7_RAT]	0	295376					0	0.5	1	1	1788	191.061	7.73779
D3ZHV7	Uncharacterized protein OS=Rattus norvegicus GN=Sdsl PE=4 SV=2 - [D3ZHV7_RAT]	0	576208					4.13364	4.19	1	2	358	37.8707	6.23975
F1M8H2	Protein Wars2 OS=Rattus norvegicus GN=Wars2 PE=3 SV=2 - [F1M8H2_RAT]	0	1.19116e+06					3.44386	2.5	1	2	360	40.1162	8.54346
F1LVX7	Protein Cep152 (Fragment) OS=Rattus norvegicus GN=Cep152 PE=4 SV=2 - [F1LVX7_RAT]	0	1.3122e+06					1.74512	0.45	1	1	1786	202.265	5.85889
F1M0Z9	Protein Msi2 (Fragment) OS=Rattus norvegicus GN=Msi2 PE=4 SV=2 - [F1M0Z9_RAT]	0	437895					5.30087	9.55	1	2	157	17.8222	9.94971
F1M8K1	Protein Pcdh1 (Fragment) OS=Rattus norvegicus GN=Pcdh1 PE=4 SV=2 - [F1M8K1_RAT]	0	449255					2.25258	1.18	1	1	1017	110.23	4.97021
Q5BKE4	Sra1 protein OS=Rattus norvegicus GN=Sra1 PE=2 SV=1 - [Q5BKE4_RAT]	0	213714					2.00604	6.8	1	1	147	15.3114	5.96045
D4A6B9	Protein LOC680161 OS=Rattus norvegicus GN=LOC680161 PE=4 SV=1 - [D4A6B9_RAT]	0	782227					0	2.63	1	1	266	29.7929	10.521
F1LMB1	Contactin-associated protein-like 5-2 OS=Rattus norvegicus GN=Cntnap5b PE=2 SV=2 - [F1LMB1_RAT]	0	201539					2.50007	1.45	1	1	1307	145.654	6.20166
M0RC31	Uncharacterized protein OS=Rattus norvegicus PE=4 SV=1 - [M0RC31_RAT]	0	895196					1.88515	2.44	1	1	410	46.9969	5.70654
M0R4Y0	Epsilon-sarcoglycan (Fragment) OS=Rattus norvegicus GN=Sgce PE=4 SV=1 - [M0R4Y0_RAT]	0	1.01594e+07					0	1.49	1	3	404	46.0683	6.3667
M0RCH5	Protein Gnpda1 (Fragment) OS=Rattus norvegicus GN=Gnpda1 PE=4 SV=1 - [M0RCH5_RAT]	0	2.4453e+06					0	3.61	1	1	249	27.856	6.37939
Q923L9	Brain-muscle-ARNT-like protein 2b (Fragment) OS=Rattus norvegicus GN=Arntl2 PE=2 SV=1 - [Q923L9_RAT]	0	0					0	1.13	1	1	531	58.9918	8.74854
D3ZLH9	Protein LOC680385 OS=Rattus norvegicus GN=LOC680385 PE=4 SV=1 - [D3ZLH9_RAT]	0	721274					6.85629	2.74	1	2	402	46.4841	9.64209
D3ZGR6	Protein Ccdc138 OS=Rattus norvegicus GN=Ccdc138 PE=4 SV=1 - [D3ZGR6_RAT]	0	0					0	2.35	1	1	681	78.1262	8.35303
D3ZI49	Stathmin OS=Rattus norvegicus GN=Stmn3 PE=2 SV=1 - [D3ZI49_RAT]	0	750573					7.8352	5.46	1	3	183	21.339	8.38232
F1LQQ1	Malic enzyme (Fragment) OS=Rattus norvegicus GN=Me1 PE=2 SV=2 - [F1LQQ1_RAT]	0	338520					7.49555	5.1	2	3	549	61.0735	5.92236
F1LTD0	Protein Gpr89b OS=Rattus norvegicus GN=Gpr89b PE=4 SV=2 - [F1LTD0_RAT]	0	9.2166e+06					0	4.4	1	1	455	52.7479	9.21729
F1M0R1	Protein Rnf213 OS=Rattus norvegicus GN=Rnf213 PE=2 SV=2 - [F1M0R1_RAT]	0	0					1.61686	0.19	1	1	5137	583.197	6.88818
F8QYX1	Chromogranin A OS=Rattus norvegicus GN=Chga PE=4 SV=1 - [F8QYX1_RAT]	0	183572					2.87854	3.72	1	1	457	50.8395	4.7417
E9PTA5	Protein Pign OS=Rattus norvegicus GN=Pign PE=4 SV=2 - [E9PTA5_RAT]	0	151444					0	1.72	1	1	931	105.098	7.57666
M0R7I6	Uncharacterized protein (Fragment) OS=Rattus norvegicus PE=4 SV=1 - [M0R7I6_RAT]	0	1.63839e+07					1.62165	4.08	1	1	196	22.4968	10.3306
Q5EBD4	Dcps protein (Fragment) OS=Rattus norvegicus GN=Dcps PE=2 SV=1 - [Q5EBD4_RAT]	0	397964					2.37381	3.29	1	1	334	38.4391	6.59521
D3Z9T5	Protein Zranb3 (Fragment) OS=Rattus norvegicus GN=Zranb3 PE=2 SV=2 - [D3Z9T5_RAT]	0	608816					0	2.57	1	1	428	48.6612	8.52881
D3ZV60	Protein Cenpe OS=Rattus norvegicus GN=Cenpe PE=3 SV=2 - [D3ZV60_RAT]	0	5.93167e+06					2.50528	0.4	1	1	2471	285.593	5.19873
F2Z3T7	Isochorismatase domain-containing protein 1 OS=Rattus norvegicus GN=Isoc1 PE=4 SV=1 - [F2Z3T7_RAT]	0	2.45638e+06					8.31214	8.42	2	3	297	32.012	7.38623
F1LRK7	Contactin-6 OS=Rattus norvegicus GN=Cntn6 PE=2 SV=2 - [F1LRK7_RAT]	0	0					2.44682	1.36	1	1	1027	113.789	6.12549
D3ZPU4	Protein Ercc6l2 OS=Rattus norvegicus GN=Ercc6l2 PE=2 SV=1 - [D3ZPU4_RAT]	0	0					0	0.78	1	1	1533	172.869	7.97217
D3ZT27	Protein RGD1565819 OS=Rattus norvegicus GN=Zfp831 PE=4 SV=2 - [D3ZT27_RAT]	0	0					2.20753	1.1	1	1	1548	164.841	7.54736
O98185	MHC class II RT1D beta1 chain antigen (Fragment) OS=Rattus norvegicus GN=RT1-Db1k PE=2 SV=1 - [O98185_RAT]	0	0					0	4.88	1	1	123	14.7205	7.44482
F1LVS8	Protein LOC688891 OS=Rattus norvegicus GN=LOC688891 PE=4 SV=2 - [F1LVS8_RAT]	0	1.05991e+06					2.95368	2.53	1	2	435	49.1842	5.43994
F1M546	Interleukin-1 receptor accessory protein-like 1 (Fragment) OS=Rattus norvegicus GN=Il1rapl1 PE=2 SV=1 - [F1M546_RAT]	0	0					1.70543	2.75	1	1	437	50.1022	5.89697
D3ZKV7	Protein Zfp469 OS=Rattus norvegicus GN=Zfp469 PE=2 SV=2 - [D3ZKV7_RAT]	0	713322					0	0.25	1	1	2840	303.491	8.33838
D3ZPV0	Protein Chst13 OS=Rattus norvegicus GN=Chst13 PE=4 SV=1 - [D3ZPV0_RAT]	0	5.68587e+06					0	2.35	1	1	340	39.5009	10.3159
D4AD82	Rho GTPase-activating protein 35 OS=Rattus norvegicus GN=Arhgap35 PE=4 SV=2 - [D4AD82_RAT]	0	0					1.64363	0.55	1	1	1278	145.546	6.69775
D3Z8C7	Protein Wdr48 OS=Rattus norvegicus GN=Wdr48 PE=4 SV=1 - [D3Z8C7_RAT]	0	189972					2.08285	1.92	1	1	676	76.0314	7.06396
B2GV69	Hnrnpa2b1 protein (Fragment) OS=Rattus norvegicus GN=Hnrnpa2b1 PE=2 SV=1 - [B2GV69_RAT]	0	1.97694e+06					2.47477	8.43	1	1	178	18.3735	9.42236
D3ZJ91	Protein Ddhd2 OS=Rattus norvegicus GN=Ddhd2 PE=2 SV=2 - [D3ZJ91_RAT]	0	0					0	1.14	1	1	699	79.5207	5.2749
D3ZFX9	Protein RGD1560207 OS=Rattus norvegicus GN=RGD1560207 PE=4 SV=1 - [D3ZFX9_RAT]	0	2.08375e+06					0	1.49	1	1	942	106.309	8.60205
D3ZJH3	Neuroligin-2 OS=Rattus norvegicus GN=Nlgn2 PE=2 SV=2 - [D3ZJH3_RAT]	0	7.3902e+06					2.04124	1.47	1	1	817	88.7798	6.1001
D3Z9B7	Protein Pla2g4f OS=Rattus norvegicus GN=Pla2g4f PE=4 SV=2 - [D3Z9B7_RAT]	0	1.11701e+07					0	1.63	1	1	857	97.3461	6.16357
F1LY78	Protein Dtx3 OS=Rattus norvegicus GN=Dtx3 PE=2 SV=2 - [F1LY78_RAT]	0	1.70707e+06					1.87167	2.02	1	1	347	37.9576	8.73389
F1M5T2	Protein Dgkd (Fragment) OS=Rattus norvegicus GN=Dgkd PE=4 SV=1 - [F1M5T2_RAT]	0	6.60086e+06					0	0.43	1	1	1172	130.513	7.79639
D3ZDM4	Uncharacterized protein (Fragment) OS=Rattus norvegicus GN=RGD1310495 PE=4 SV=2 - [D3ZDM4_RAT]	0	0					2.08464	2.36	1	1	423	45.6235	8.1626
D4A1M2	Protein Vps13b OS=Rattus norvegicus GN=Vps13b PE=2 SV=1 - [D4A1M2_RAT]	0	0					0	0.25	1	1	3995	444.412	6.55127
F1LQI4	Aggrecan core protein OS=Rattus norvegicus GN=Acan PE=2 SV=2 - [F1LQI4_RAT]	0	5.49155e+06					2.1401	1.27	1	1	2121	220.425	4.27197
G3V822	Carboxylesterase 1D OS=Rattus norvegicus GN=Ces1d PE=4 SV=2 - [G3V822_RAT]	0	605394					9.75927	6.22	3	4	563	61.9396	6.53662
M0R9Z8	Protein LOC100912350 OS=Rattus norvegicus GN=LOC100912350 PE=4 SV=1 - [M0R9Z8_RAT]	0	0					1.90584	1.64	1	1	733	80.1401	6.17627
M0R6Q0	Uncharacterized protein OS=Rattus norvegicus PE=4 SV=1 - [M0R6Q0_RAT]	0	0					1.60586	2.29	1	1	742	84.6783	8.93896
M0R9L4	Protein Dtna-ps1 OS=Rattus norvegicus GN=Dtna-ps1 PE=4 SV=1 - [M0R9L4_RAT]	0	164027					3.55842	2.73	1	1	513	58.7526	8.27979
Q80UF5	PP5-TPR variant (Fragment) OS=Rattus norvegicus GN=Ppp5c PE=2 SV=1 - [Q80UF5_RAT]	0	580044					3.03588	10.32	1	1	126	14.2111	8.35303
D3ZE56	Phosphatidylinositol 4-phosphate 3-kinase C2 domain-containing subunit gamma OS=Rattus norvegicus GN=Pik3c2g PE=4 SV=2 - [D3ZE56_RAT]	0	0					0	0.53	1	1	1505	170.814	6.78564
D4AD05	Protein Crocc OS=Rattus norvegicus GN=Crocc PE=2 SV=2 - [D4AD05_RAT]	0	1.04066e+06					1.79526	0.49	1	1	1846	208.793	5.46533
F1LMM9	Elongation factor G, mitochondrial OS=Rattus norvegicus GN=Gfm1 PE=2 SV=1 - [F1LMM9_RAT]	0	865983					10.4171	4.68	3	4	748	83.2595	7.1665
D3ZHK8	Protein Cpeb2 OS=Rattus norvegicus GN=Cpeb2 PE=4 SV=2 - [D3ZHK8_RAT]	0	770738					0	2.39	1	1	711	76.9698	7.94287
D3Z941	Protein Mars OS=Rattus norvegicus GN=Mars PE=3 SV=1 - [D3Z941_RAT]	0	857276					2.27295	2.55	2	2	902	101.517	6.45557
Q5FWY9	Col4a1 protein (Fragment) OS=Rattus norvegicus GN=Col4a1 PE=2 SV=1 - [Q5FWY9_RAT]	0	983805					7.52355	14.83	3	6	263	28.5345	7.78174
F1MA78	Protein Reps2-ps1 OS=Rattus norvegicus GN=Reps2-ps1 PE=2 SV=2 - [F1MA78_RAT]	0	1.13486e+07					0	2.17	1	1	460	51.0094	6.07471
D4AE10	Protein RGD1563613 OS=Rattus norvegicus GN=RGD1563613 PE=4 SV=1 - [D4AE10_RAT]	0	3.27377e+06					2.24663	7.26	1	1	124	13.6837	9.92041
F1LXL6	Protein Fer1l6 OS=Rattus norvegicus GN=Fer1l6 PE=4 SV=2 - [F1LXL6_RAT]	0	114471					0	1.07	1	1	1867	209.774	6.15088
D3ZTT0	Protein Duxbl OS=Rattus norvegicus GN=Duxbl1 PE=3 SV=1 - [D3ZTT0_RAT]	0	546360					0	3.12	1	1	353	40.4266	8.68994
D3Z9Y5	Uncharacterized protein OS=Rattus norvegicus PE=2 SV=1 - [D3Z9Y5_RAT]	0	2.4934e+06					0	1.1	1	1	639	71.4495	6.771
F1LWL8	Protein Slc5a12 (Fragment) OS=Rattus norvegicus GN=Slc5a12 PE=2 SV=1 - [F1LWL8_RAT]	0	2.12499e+06					0	3.36	2	2	506	55.4973	7.73779
D3ZSK0	Protein She OS=Rattus norvegicus GN=She PE=2 SV=1 - [D3ZSK0_RAT]	0	0					2.49908	6.18	1	3	340	37.8849	6.63916
F1LSM6	Geranylgeranyl transferase type-2 subunit beta (Fragment) OS=Rattus norvegicus GN=Rabggtb PE=2 SV=1 - [F1LSM6_RAT]	0	1.68542e+06					1.6321	3.32	1	1	331	36.8153	5.16064
E9PT91	Protein Alg8 OS=Rattus norvegicus GN=Alg8 PE=2 SV=1 - [E9PT91_RAT]	0	0					0	0.95	1	1	526	59.6736	8.68994
F1LU57	Uncharacterized protein (Fragment) OS=Rattus norvegicus PE=4 SV=1 - [F1LU57_RAT]	0	0					1.63581	5.15	1	1	272	29.802	8.35303
D3ZZ68	Protein Synpo2l OS=Rattus norvegicus GN=Synpo2l PE=4 SV=1 - [D3ZZ68_RAT]	0	0					0	0.72	1	1	978	102.998	9.72998
F1M9P7	Uncharacterized protein (Fragment) OS=Rattus norvegicus PE=2 SV=2 - [F1M9P7_RAT]	0	0					0	2.94	1	1	646	72.8316	6.12549
Q32KJ3	Sulfatase 2 OS=Rattus norvegicus GN=Sulf2 PE=2 SV=1 - [Q32KJ3_RAT]	0	0					0	0.81	1	1	866	99.4248	9.12939
M0R6G5	Uncharacterized protein OS=Rattus norvegicus PE=4 SV=1 - [M0R6G5_RAT]	0	5.71607e+06					0	15.83	1	1	120	13.5897	9.01221
F1M695	Protein Yjefn3 (Fragment) OS=Rattus norvegicus GN=Yjefn3 PE=4 SV=2 - [F1M695_RAT]	0	742390					0	11.62	1	1	198	21.233	7.91357
D4A8Y5	Staphylococcal nuclease domain-containing protein 1 OS=Rattus norvegicus GN=Snd1 PE=2 SV=2 - [D4A8Y5_RAT]	0	465442					0	0.91	1	1	881	98.991	6.84424
M0RAT0	Protein Arhgap44 OS=Rattus norvegicus GN=Arhgap44 PE=4 SV=1 - [M0RAT0_RAT]	0	305943					2.32277	2.47	2	2	770	84.0388	6.84424
D3ZK16	Protein RGD1309747 OS=Rattus norvegicus GN=RGD1309747 PE=4 SV=2 - [D3ZK16_RAT]	0	709927					1.61636	0.41	1	1	2220	240.307	5.61768
D3ZEA8	Protein Syne1 OS=Rattus norvegicus GN=Syne1 PE=2 SV=2 - [D3ZEA8_RAT]	0	2.52846e+06					4.90646	0.69	2	3	2754	315.598	5.22412
D4A4H3	Uncharacterized protein OS=Rattus norvegicus PE=2 SV=2 - [D4A4H3_RAT]	0	0					0	0.62	1	1	3701	413.83	6.78564
Q8R2F4	Voltage-gated calcium channel alpha-1D subunit (Fragment) OS=Rattus norvegicus GN=Cacna1d PE=2 SV=1 - [Q8R2F4_RAT]	0	1.53801e+07					0	2.36	1	1	296	33.3013	6.78564
D3ZXG2	Protein Armc4 OS=Rattus norvegicus GN=Armc4 PE=4 SV=2 - [D3ZXG2_RAT]	0	2.045e+06					0	0.77	1	1	1036	114.91	5.8208
Q5EB55	Gbe1 protein (Fragment) OS=Rattus norvegicus GN=Gbe1 PE=2 SV=1 - [Q5EB55_RAT]	0	349188					1.97338	2.24	1	1	536	61.7929	6.07471
Q9EPV3	Endothelial monocyte-activating polypeptide II (Fragment) OS=Rattus norvegicus GN=Aimp1 PE=2 SV=1 - [Q9EPV3_RAT]	0	1.41231e+06					3.71169	19.23	1	2	78	8.3663	5.93506
Q6P784	Branched-chain-amino-acid aminotransferase OS=Rattus norvegicus GN=Bcat2 PE=2 SV=1 - [Q6P784_RAT]	0	664875					1.81378	4.38	1	1	388	43.5676	8.30908
Q7TP32	Ac2-127 OS=Rattus norvegicus GN=Polr1c PE=2 SV=1 - [Q7TP32_RAT]	0	423222					0	3.85	1	1	260	29.2772	5.99854
