# Supplementary material for: Mysterious inhibitory cell regulator investigated and found likely to be secretogranin II related
Source: PeerJ. 2017 Oct 13;5:e3833. doi: 10.7717/peerj.3833 (PMC5642266; doi:10.7717/peerj.3833)
Supplement: Supplemental Information 16 — Test total 406. [file peerj-05-3833-s016.xlsx]

## Sheet: Sheet1
Accession	Description	Score	Coverage	# Proteins	# Unique Peptides	# Peptides	# PSMs	Area	# AAs	MW [kDa]	calc. pI
F1LMV6	Protein Dsp OS=Rattus norvegicus GN=Dsp PE=1 SV=1 - [F1LMV6_RAT]	311.753	27.98	8	72	73	118	3.57345e+07	2877	332.187	6.82959
F7F801	Protein Krt86 OS=Rattus norvegicus GN=Krt86 PE=3 SV=1 - [F7F801_RAT]	233.194	48.77	4	2	29	93	2.55036e+09	486	53.2659	5.87158
A7M776	Type II keratin Kb23 OS=Rattus norvegicus GN=Kb23 PE=2 SV=1 - [A7M776_RAT]	229.473	44.89	4	1	27	91	2.55036e+09	479	52.6987	5.74463
Q6P6Q2	Keratin, type II cytoskeletal 5 OS=Rattus norvegicus GN=Krt5 PE=1 SV=1 - [K2C5_RAT]	200.342	30.73	5	11	26	77	1.63209e+09	576	61.7877	7.79639
A7M777	Type II keratin Kb25 OS=Rattus norvegicus GN=Krt85 PE=2 SV=1 - [A7M777_RAT]	195.402	35.7	2	8	25	73	1.50326e+09	507	55.7854	6.65381
A7M746	LOC681126 protein OS=Rattus norvegicus GN=Krt83 PE=2 SV=1 - [A7M746_RAT]	194.591	45.05	1	6	28	77	2.55036e+09	495	54.6638	6.3667
Q6IFU8	Keratin, type I cytoskeletal 17 OS=Rattus norvegicus GN=Krt17 PE=2 SV=1 - [K1C17_RAT]	178.607	57.04	6	10	29	72	2.51459e+09	433	48.0931	5.021
Q6IG05	Keratin, type II cytoskeletal 75 OS=Rattus norvegicus GN=Krt75 PE=3 SV=2 - [K2C75_RAT]	174.511	25.46	3	6	21	63	1.63209e+09	542	58.9906	8.07471
Q6IFW6	Keratin, type I cytoskeletal 10 OS=Rattus norvegicus GN=Krt10 PE=3 SV=1 - [K1C10_RAT]	167.089	19.77	2	11	16	67	1.74746e+09	526	56.4705	5.14795
F6SF42	Protein Krt33b OS=Rattus norvegicus GN=Krt31 PE=3 SV=1 - [F6SF42_RAT]	164.265	37.53	5	1	20	65	1.97559e+09	405	46.0875	4.86865
Q4FZU2	Keratin, type II cytoskeletal 6A OS=Rattus norvegicus GN=Krt6a PE=1 SV=1 - [K2C6A_RAT]	158.601	19.38	2	2	14	55	2.33293e+09	552	59.2127	7.94287
Q6IFW1	RCG34348, isoform CRA_a OS=Rattus norvegicus GN=Krt33a PE=2 SV=1 - [Q6IFW1_RAT]	153.482	35.64	1	1	19	57	1.52088e+09	404	45.9434	4.81787
P68370	Tubulin alpha-1A chain OS=Rattus norvegicus GN=Tuba1a PE=1 SV=1 - [TBA1A_RAT]	141.613	43.68	3	6	14	44	1.07327e+08	451	50.1036	5.05908
P69897	Tubulin beta-5 chain OS=Rattus norvegicus GN=Tubb5 PE=1 SV=1 - [TBB5_RAT]	134.496	45.72	3	2	15	46	4.2493e+07	444	49.639	4.89404
P85108	Tubulin beta-2A chain OS=Rattus norvegicus GN=Tubb2a PE=1 SV=1 - [TBB2A_RAT]	134.174	43.37	3	1	14	45	4.41146e+07	445	49.875	4.89404
Q3KRE8	Tubulin beta-2B chain OS=Rattus norvegicus GN=Tubb2b PE=1 SV=1 - [TBB2B_RAT]	132.117	43.37	3	1	14	44	4.41146e+07	445	49.9209	4.89404
Q6IMF3	Keratin, type II cytoskeletal 1 OS=Rattus norvegicus GN=Krt1 PE=2 SV=1 - [K2C1_RAT]	129.546	9.92	1	5	9	49	2.66985e+09	625	64.7911	7.86963
Q6IFV1	Keratin, type I cytoskeletal 14 OS=Rattus norvegicus GN=Krt14 PE=2 SV=1 - [K1C14_RAT]	127.54	35.05	5	3	16	45	1.40817e+09	485	52.6509	5.16064
Q6P0K8	Junction plakoglobin OS=Rattus norvegicus GN=Jup PE=1 SV=1 - [PLAK_RAT]	126.099	40.81	4	22	22	38	3.27867e+07	745	81.7488	6.13818
B4F7C2	Protein Tubb4a OS=Rattus norvegicus GN=Tubb4a PE=2 SV=1 - [B4F7C2_RAT]	115.981	44.14	3	2	14	40	3.29634e+07	444	49.5539	4.88135
Q6IFU7	Keratin, type I cytoskeletal 42 OS=Rattus norvegicus GN=Krt42 PE=3 SV=1 - [K1C42_RAT]	112.309	23.45	7	4	14	42	1.21308e+09	452	50.1819	5.16064
F1M0B2	Uncharacterized protein (Fragment) OS=Rattus norvegicus GN=LOC683295 PE=4 SV=2 - [F1M0B2_RAT]	104.337	12.15	2	2	7	34	2.33293e+09	535	57.715	7.88428
Q6IFV9	RCG35149, isoform CRA_a OS=Rattus norvegicus GN=Krt34 PE=2 SV=1 - [Q6IFV9_RAT]	101.699	25.83	1	1	14	37	1305026167	391	44.3475	4.79248
Q5XIF6	Tubulin alpha-4A chain OS=Rattus norvegicus GN=Tuba4a PE=2 SV=1 - [TBA4A_RAT]	97.7751	39.73	2	4	12	32	6.22832e+07	448	49.8924	5.05908
Q6IFV6	Protein Krt35 OS=Rattus norvegicus GN=Krt35 PE=2 SV=1 - [Q6IFV6_RAT]	96.6077	25.71	2	7	15	36	1.97559e+09	455	50.6426	5.0083
V9GZ85	Actin, cytoplasmic 2 (Fragment) OS=Rattus norvegicus GN=LOC100361457 PE=3 SV=1 - [V9GZ85_RAT]	89.7535	48.93	13	6	14	40	1.84839e+08	374	41.5927	5.70654
Q6IG03	Keratin, type II cytoskeletal 73 OS=Rattus norvegicus GN=Krt73 PE=1 SV=1 - [K2C73_RAT]	79.7018	12.66	5	2	9	27	1.83155e+09	553	60.3494	7.94287
P02688	Myelin basic protein OS=Rattus norvegicus GN=Mbp PE=1 SV=3 - [MBP_RAT]	73.9318	29.23	3	6	6	31	5.52982e+08	195	21.489	11.2388
Q63279	Keratin, type I cytoskeletal 19 OS=Rattus norvegicus GN=Krt19 PE=1 SV=2 - [K1C19_RAT]	72.6777	22.58	9	1	14	39	2.44732e+09	403	44.6086	5.31299
Q6IG01	Keratin, type II cytoskeletal 1b OS=Rattus norvegicus GN=Krt77 PE=3 SV=1 - [K2C1B_RAT]	67.0823	10.98	1	2	8	24	1.76872e+09	519	57.2196	5.64307
P63102	14-3-3 protein zeta/delta OS=Rattus norvegicus GN=Ywhaz PE=1 SV=1 - [1433Z_RAT]	58.1239	42.86	1	7	8	16	2.16758e+07	245	27.7537	4.79248
Q6IFU9	Protein Krt16 OS=Rattus norvegicus GN=Krt16 PE=2 SV=1 - [Q6IFU9_RAT]	57.3108	23.76	3	6	11	21	4.35451e+08	463	50.7457	5.12256
M0RCB1	Protein LOC102549957 OS=Rattus norvegicus GN=LOC102549957 PE=3 SV=1 - [M0RCB1_RAT]	55.6422	18.25	10	3	11	19	2.08898e+07	641	70.386	5.59229
Q4QQV0	Protein Tubb6 OS=Rattus norvegicus GN=Tubb6 PE=2 SV=1 - [Q4QQV0_RAT]	55.3671	23.94	2	2	8	19	2.45374e+07	447	50.0271	4.89404
Q6IFZ5	Protein Krt76 OS=Rattus norvegicus GN=Krt76 PE=2 SV=1 - [Q6IFZ5_RAT]	54.4879	10.33	3	1	9	23	6.83087e+08	581	61.7205	8.38232
Q6IFV4	Keratin, type I cytoskeletal 13 OS=Rattus norvegicus GN=Krt13 PE=3 SV=1 - [K1C13_RAT]	53.1513	13.24	5	1	10	26	1.743e+09	438	47.6993	4.90674
Q05175	Brain acid soluble protein 1 OS=Rattus norvegicus GN=Basp1 PE=1 SV=2 - [BASP1_RAT]	52.5539	44.09	1	4	4	14	5.66489e+06	220	21.7774	4.51318
P46462	Transitional endoplasmic reticulum ATPase OS=Rattus norvegicus GN=Vcp PE=1 SV=3 - [TERA_RAT]	52.5001	20.97	1	14	14	20	6.88584e+06	806	89.2927	5.26221
P05197	Elongation factor 2 OS=Rattus norvegicus GN=Eef2 PE=1 SV=4 - [EF2_RAT]	52.4217	18.18	4	14	14	18	1.4973e+07	858	95.2229	6.82959
F1LMW7	Myristoylated alanine-rich C-kinase substrate OS=Rattus norvegicus GN=Marcks PE=4 SV=2 - [F1LMW7_RAT]	51.9677	27.27	2	3	3	12	5.50071e+06	308	29.8709	4.36084
P06687	Sodium/potassium-transporting ATPase subunit alpha-3 OS=Rattus norvegicus GN=Atp1a3 PE=1 SV=2 - [AT1A3_RAT]	51.7807	17.28	8	13	13	18	1.39093e+07	1013	111.62	5.41455
P04797	Glyceraldehyde-3-phosphate dehydrogenase OS=Rattus norvegicus GN=Gapdh PE=1 SV=3 - [G3P_RAT]	49.6146	40.24	33	8	8	16	3.89152e+07	333	35.8052	8.03076
Q10758	Keratin, type II cytoskeletal 8 OS=Rattus norvegicus GN=Krt8 PE=1 SV=3 - [K2C8_RAT]	49.3284	12.63	7	1	9	22	6.82421e+08	483	53.9853	5.99854
P09117	Fructose-bisphosphate aldolase C OS=Rattus norvegicus GN=Aldoc PE=1 SV=3 - [ALDOC_RAT]	44.9865	22.87	4	7	8	16	7.6326e+06	363	39.2592	7.12256
U3R7A7	Keratin 71 OS=Rattus norvegicus GN=Krt71 PE=2 SV=1 - [U3R7A7_RAT]	44.6262	11.85	2	3	7	17	4.47423e+08	523	57.2858	6.60986
G3V939	Protein Krt82 OS=Rattus norvegicus GN=Krt82 PE=2 SV=2 - [G3V939_RAT]	43.797	18.05	1	4	12	19	9.92073e+08	493	54.4481	5.5542
Q6IG02	Keratin, type II cytoskeletal 2 epidermal OS=Rattus norvegicus GN=Krt2 PE=3 SV=1 - [K22E_RAT]	43.7673	11.68	4	5	10	18	5.94986e+08	685	69.0852	7.69385
P07335	Creatine kinase B-type OS=Rattus norvegicus GN=Ckb PE=1 SV=2 - [KCRB_RAT]	42.7636	25.46	1	8	8	14	1.64789e+07	381	42.6983	5.66846
P14659	Heat shock-related 70 kDa protein 2 OS=Rattus norvegicus GN=Hspa2 PE=1 SV=2 - [HSP72_RAT]	42.3656	14.06	4	1	9	14	2.08898e+07	633	69.5987	5.66846
P06761	78 kDa glucose-regulated protein OS=Rattus norvegicus GN=Hspa5 PE=1 SV=1 - [GRP78_RAT]	41.9237	15.44	1	6	8	14	1.3364e+07	654	72.3024	5.16064
P62260	14-3-3 protein epsilon OS=Rattus norvegicus GN=Ywhae PE=1 SV=1 - [1433E_RAT]	41.4166	29.8	1	5	6	13	1.56793e+07	255	29.1554	4.7417
D3ZY51	Plakophilin 1 (Predicted) OS=Rattus norvegicus GN=Pkp1 PE=4 SV=2 - [D3ZY51_RAT]	41.0498	22.64	2	11	11	16	3.04756e+07	605	67.1746	8.70459
G3V712	Keratin complex 2, basic, gene 7, isoform CRA_a OS=Rattus norvegicus GN=Krt7 PE=3 SV=1 - [G3V712_RAT]	40.2828	10.28	5	1	7	18	4.58627e+08	457	50.7751	5.87158
P82995	Heat shock protein HSP 90-alpha OS=Rattus norvegicus GN=Hsp90aa1 PE=1 SV=3 - [HS90A_RAT]	37.7612	15.83	9	5	11	15	2.69838e+07	733	84.7618	5.0083
P34058	Heat shock protein HSP 90-beta OS=Rattus norvegicus GN=Hsp90ab1 PE=1 SV=4 - [HS90B_RAT]	35.864	15.88	8	4	11	15	2.51991e+07	724	83.2291	5.03369
P68035	Actin, alpha cardiac muscle 1 OS=Rattus norvegicus GN=Actc1 PE=2 SV=1 - [ACTC_RAT]	35.7033	26.79	7	1	9	20	7.44233e+07	377	41.9919	5.38916
A0A096MJE0	Protein Krt32 (Fragment) OS=Rattus norvegicus GN=Krt32 PE=4 SV=1 - [A0A096MJE0_RAT]	34.6005	16.35	4	4	7	15	1.27341e+09	416	47.4	4.84326
M0R757	Elongation factor 1-alpha OS=Rattus norvegicus GN=LOC100360413 PE=3 SV=1 - [M0R757_RAT]	33.7345	19.91	8	8	8	13	4.11247e+07	462	50.0761	9.01221
Q07936	Annexin A2 OS=Rattus norvegicus GN=Anxa2 PE=1 SV=2 - [ANXA2_RAT]	32.9228	22.71	1	6	6	10	2.1074e+07	339	38.6538	7.69385
M0R5J4	Uncharacterized protein OS=Rattus norvegicus PE=3 SV=1 - [M0R5J4_RAT]	32.1149	20.97	8	6	7	10	1.95148e+07	434	47.0452	6.3667
P48500	Triosephosphate isomerase OS=Rattus norvegicus GN=Tpi1 PE=1 SV=2 - [TPIS_RAT]	31.3201	40.16	3	1	6	10	6.31323e+06	249	26.8318	7.23975
P68255	14-3-3 protein theta OS=Rattus norvegicus GN=Ywhaq PE=1 SV=1 - [1433T_RAT]	31.1237	25.71	2	3	5	9	2.26668e+07	245	27.7608	4.77979
Q00715	Histone H2B type 1 OS=Rattus norvegicus PE=1 SV=2 - [H2B1_RAT]	31.1111	41.6	9	3	6	11	1.24419e+08	125	13.9816	10.3599
D3ZNZ9	Histone H2B OS=Rattus norvegicus GN=Hist3h2ba PE=3 SV=1 - [D3ZNZ9_RAT]	30.6944	35.71	2	1	4	10	9.29657e+07	126	13.9856	10.3745
P47942	Dihydropyrimidinase-related protein 2 OS=Rattus norvegicus GN=Dpysl2 PE=1 SV=1 - [DPYL2_RAT]	30.6168	21.85	1	7	8	11	8.87866e+06	572	62.2386	6.37939
Q6SA19	Triosephosphate isomerase OS=Rattus norvegicus GN=LOC500959 PE=2 SV=1 - [Q6SA19_RAT]	30.6009	40.16	2	1	6	10	6.31323e+06	249	26.8497	6.87354
M0RDM4	Histone H2A OS=Rattus norvegicus GN=LOC680322 PE=3 SV=1 - [M0RDM4_RAT]	29.4435	35.94	20	4	4	10	8.0484e+07	128	14.0599	11.0337
P05065	Fructose-bisphosphate aldolase A OS=Rattus norvegicus GN=Aldoa PE=1 SV=2 - [ALDOA_RAT]	29.3633	33.24	3	3	11	16	2.92412e+07	364	39.3273	8.08936
P02650	Apolipoprotein E OS=Rattus norvegicus GN=Apoe PE=1 SV=2 - [APOE_RAT]	28.5182	19.23	3	5	5	10	1.46214e+07	312	35.7313	5.2749
D3ZYW2	Heterogeneous nuclear ribonucleoprotein H OS=Rattus norvegicus GN=Hnrnph1 PE=4 SV=1 - [D3ZYW2_RAT]	24.8536	7.93	6	2	2	6	2.13237e+06	429	47.0454	6.34131
P07323	Gamma-enolase OS=Rattus norvegicus GN=Eno2 PE=1 SV=2 - [ENOG_RAT]	23.94	13.13	1	3	4	7	3.27625e+07	434	47.1109	5.16064
P50398	Rab GDP dissociation inhibitor alpha OS=Rattus norvegicus GN=Gdi1 PE=1 SV=1 - [GDIA_RAT]	21.7787	23.71	2	6	8	8	3.45756e+06	447	50.5042	5.13525
P68511	14-3-3 protein eta OS=Rattus norvegicus GN=Ywhah PE=1 SV=2 - [1433F_RAT]	21.1897	17.07	1	2	4	9	2.20094e+07	246	28.194	4.89404
P61983	14-3-3 protein gamma OS=Rattus norvegicus GN=Ywhag PE=1 SV=2 - [1433G_RAT]	20.7995	17	1	2	4	7	2.3351e+07	247	28.2849	4.89404
P70645	Bleomycin hydrolase OS=Rattus norvegicus GN=Blmh PE=1 SV=1 - [BLMH_RAT]	20.6045	5.73	3	3	3	8	6078944	454	52.2888	6.48096
P63245	Guanine nucleotide-binding protein subunit beta-2-like 1 OS=Rattus norvegicus GN=Gnb2l1 PE=1 SV=3 - [GBLP_RAT]	20.3211	19.87	1	5	5	8	3.30548e+06	317	35.0546	7.69385
Q6AY07	Fructose-bisphosphate aldolase OS=Rattus norvegicus GN=Aldoart2 PE=2 SV=1 - [Q6AY07_RAT]	19.8019	24.73	3	2	10	13	2.92412e+07	364	39.4673	7.41553
G3V9A3	Protein Sfn OS=Rattus norvegicus GN=Sfn PE=3 SV=1 - [G3V9A3_RAT]	19.282	19.35	3	2	4	8	2.06925e+07	248	27.7297	4.77979
G3V8L3	Lamin A, isoform CRA_b OS=Rattus norvegicus GN=Lmna PE=3 SV=1 - [G3V8L3_RAT]	18.5595	9.02	4	6	6	9	4.44129e+06	665	74.2667	6.97607
P62243	40S ribosomal protein S8 OS=Rattus norvegicus GN=Rps8 PE=1 SV=2 - [RS8_RAT]	18.5097	25.96	4	4	4	6	2.26577e+06	208	24.1902	10.3159
Q71DI1	Dermcidin OS=Rattus norvegicus PE=2 SV=1 - [Q71DI1_RAT]	18.0547	22.73	1	2	2	6	4.55045e+07	110	11.2768	6.53662
P62804	Histone H4 OS=Rattus norvegicus GN=Hist1h4b PE=1 SV=2 - [H4_RAT]	17.5247	32.04	1	4	4	9	6.8808e+07	103	11.3604	11.356
M0RBY5	Uncharacterized protein OS=Rattus norvegicus PE=3 SV=1 - [M0RBY5_RAT]	17.2226	18.38	9	4	5	7	1.38951e+07	272	29.865	7.84033
F1LRJ9	Uncharacterized protein (Fragment) OS=Rattus norvegicus GN=Selenbp1 PE=4 SV=1 - [F1LRJ9_RAT]	17.1907	14.01	2	4	4	6	1.91434e+07	471	52.3674	6.56592
P35213	14-3-3 protein beta/alpha OS=Rattus norvegicus GN=Ywhab PE=1 SV=3 - [1433B_RAT]	16.9608	20.73	1	2	4	6	2.22871e+07	246	28.0368	4.88135
P42123	L-lactate dehydrogenase B chain OS=Rattus norvegicus GN=Ldhb PE=1 SV=2 - [LDHB_RAT]	16.6897	20.66	3	7	8	9	1.65939e+07	334	36.5891	6.04932
F1M6I7	Proteasome subunit alpha type OS=Rattus norvegicus GN=Psma8 PE=3 SV=2 - [F1M6I7_RAT]	16.6051	18.8	4	3	3	6	2.52769e+06	250	27.8757	8.68994
O88989	Malate dehydrogenase, cytoplasmic OS=Rattus norvegicus GN=Mdh1 PE=1 SV=3 - [MDHC_RAT]	15.8665	11.38	1	4	4	6	7.00789e+06	334	36.46	6.58057
M0R5K9	Protein LOC100912024 (Fragment) OS=Rattus norvegicus GN=LOC100912024 PE=3 SV=1 - [M0R5K9_RAT]	15.6414	32.45	5	5	5	7	2.53399e+06	151	17.6438	11.1069
P10111	Peptidyl-prolyl cis-trans isomerase A OS=Rattus norvegicus GN=Ppia PE=1 SV=2 - [PPIA_RAT]	15.5086	30.49	3	3	3	6	3.91956e+06	164	17.8628	8.1626
G3V7Y3	ATP synthase subunit delta, mitochondrial OS=Rattus norvegicus GN=Atp5d PE=3 SV=1 - [G3V7Y3_RAT]	14.9474	13.69	2	2	2	5	2.51127e+07	168	17.5522	5.23682
Q0QF43	Malate dehydrogenase (Fragment) OS=Rattus norvegicus GN=Mdh2 PE=2 SV=1 - [Q0QF43_RAT]	14.9372	15.28	2	3	3	6	2.39008e+06	301	31.6726	7.63525
M0R9Q9	Cytosol aminopeptidase (Fragment) OS=Rattus norvegicus GN=Lap3 PE=3 SV=1 - [M0R9Q9_RAT]	14.605	10.06	2	4	4	8	1.12163e+07	487	52.5947	6.48096
P11980	Pyruvate kinase PKM OS=Rattus norvegicus GN=Pkm PE=1 SV=3 - [KPYM_RAT]	14.5586	11.68	5	2	5	7	1.89216e+07	531	57.7809	7.06396
Q6IFW7	Protein Krt28 OS=Rattus norvegicus GN=Krt28 PE=2 SV=1 - [Q6IFW7_RAT]	13.9038	7.83	2	2	4	8	9.42652e+08	383	41.2996	5.50342
Q5U300	Ubiquitin-like modifier-activating enzyme 1 OS=Rattus norvegicus GN=Uba1 PE=1 SV=1 - [UBA1_RAT]	13.7266	2.17	4	2	2	4	2.94778e+06	1058	117.713	5.56689
F1M6F6	Protein Asap2 (Fragment) OS=Rattus norvegicus GN=Asap2 PE=4 SV=2 - [F1M6F6_RAT]	13.305	0.87	3	1	1	6	2.60277e+09	922	102.694	6.68311
P45592	Cofilin-1 OS=Rattus norvegicus GN=Cfl1 PE=1 SV=3 - [COF1_RAT]	13.1382	15.06	2	2	2	5	2.48801e+06	166	18.5207	8.08936
P31044	Phosphatidylethanolamine-binding protein 1 OS=Rattus norvegicus GN=Pebp1 PE=1 SV=3 - [PEBP1_RAT]	13.0941	25.13	1	3	3	4	1.9188e+06	187	20.7884	5.79541
Q6LDS4	Superoxide dismutase [Cu-Zn] OS=Rattus norvegicus GN=Sod1 PE=2 SV=1 - [Q6LDS4_RAT]	13.0585	30.26	3	4	4	7	8.52888e+06	152	15.6997	6.354
Q0QEP3	ATP synthase subunit beta (Fragment) OS=Rattus norvegicus GN=Atp5b PE=2 SV=1 - [Q0QEP3_RAT]	12.9638	13.41	3	3	3	4	1.87291e+06	343	37.2282	5.10986
P85845	Fascin OS=Rattus norvegicus GN=Fscn1 PE=1 SV=2 - [FSCN1_RAT]	12.8605	8.11	1	2	2	3	4.07015e+06	493	54.4569	6.7417
M0R4D7	Protein LOC100910820 OS=Rattus norvegicus GN=LOC100910820 PE=3 SV=1 - [M0R4D7_RAT]	12.8055	5.38	1	1	2	4	3.29291e+06	483	51.6642	8.88037
O35987	NSFL1 cofactor p47 OS=Rattus norvegicus GN=Nsfl1c PE=1 SV=1 - [NSF1C_RAT]	12.4679	9.46	1	2	2	3	2.20949e+06	370	40.6554	5.14795
Q63945	Protein SET OS=Rattus norvegicus GN=Set PE=2 SV=2 - [SET_RAT]	12.1394	7.27	5	2	2	5	1.99206e+06	289	33.3857	4.32275
P01830	Thy-1 membrane glycoprotein OS=Rattus norvegicus GN=Thy1 PE=1 SV=1 - [THY1_RAT]	12.0401	17.39	2	3	3	9	5.38622e+07	161	18.1607	9.27588
Q6IMF1	Keratin, type II cytoskeletal 80 OS=Rattus norvegicus GN=Krt80 PE=3 SV=1 - [K2C80_RAT]	12.0059	6.86	1	3	3	4	4.76136e+06	452	50.5188	6.20166
A0A0A6YYD8	Uncharacterized protein (Fragment) OS=Rattus norvegicus PE=4 SV=1 - [A0A0A6YYD8_RAT]	11.8515	10.06	6	3	3	6	3.7749e+06	179	20.3446	6.80029
P62909	40S ribosomal protein S3 OS=Rattus norvegicus GN=Rps3 PE=1 SV=1 - [RS3_RAT]	11.818	20.16	2	5	5	6	3.60637e+06	243	26.6574	9.65674
P38983	40S ribosomal protein SA OS=Rattus norvegicus GN=Rpsa PE=1 SV=3 - [RSSA_RAT]	11.749	12.2	1	3	3	4	5.20624e+06	295	32.8034	4.86865
P81155	Voltage-dependent anion-selective channel protein 2 OS=Rattus norvegicus GN=Vdac2 PE=1 SV=2 - [VDAC2_RAT]	11.3662	16.27	2	4	4	6	2.63755e+06	295	31.7256	7.48877
A0A0A0MY09	Endoplasmin OS=Rattus norvegicus GN=Hsp90b1 PE=4 SV=1 - [A0A0A0MY09_RAT]	11.1836	3.98	2	2	3	4	5.64697e+06	804	92.8424	4.80518
Q6P3V8	Eukaryotic translation initiation factor 4A1 OS=Rattus norvegicus GN=Eif4a1 PE=2 SV=1 - [Q6P3V8_RAT]	10.6556	9.85	3	3	3	4	4.48574e+06	406	46.1246	5.47803
E9PSI7	Alpha-amylase OS=Rattus norvegicus GN=Amy2a3 PE=3 SV=2 - [E9PSI7_RAT]	10.6312	9.25	7	3	3	5	8.41816e+06	508	57.1298	7.79639
O35264	Platelet-activating factor acetylhydrolase IB subunit beta OS=Rattus norvegicus GN=Pafah1b2 PE=1 SV=1 - [PA1B2_RAT]	10.5616	12.23	1	2	2	4	1.80393e+06	229	25.5652	5.92236
G3V7M3	Protein Krt23 OS=Rattus norvegicus GN=Krt23 PE=3 SV=1 - [G3V7M3_RAT]	10.4928	6.87	2	1	4	5	5.20814e+08	422	48.0532	6.04932
P17220	Proteasome subunit alpha type-2 OS=Rattus norvegicus GN=Psma2 PE=1 SV=3 - [PSA2_RAT]	10.4325	17.09	2	2	2	3	1.20221e+06	234	25.9103	7.43018
B2RYX0	Naca protein OS=Rattus norvegicus GN=Naca PE=2 SV=1 - [B2RYX0_RAT]	10.0891	13.49	2	2	2	3	2.51263e+06	215	23.3697	4.56396
P0CG51	Polyubiquitin-B OS=Rattus norvegicus GN=Ubb PE=1 SV=1 - [UBB_RAT]	10.0352	44.59	11	3	3	5	2.94265e+07	305	34.3475	7.53271
X1WI37	Protein LOC100362640 (Fragment) OS=Rattus norvegicus GN=LOC100362640 PE=3 SV=1 - [X1WI37_RAT]	9.7908	15.27	3	4	4	4	4.91275e+06	262	29.448	10.1548
D3ZPC4	Neural cell adhesion molecule L1 OS=Rattus norvegicus GN=L1cam PE=4 SV=2 - [D3ZPC4_RAT]	9.57919	1.35	1	1	1	2	1.54511e+06	1255	140.305	5.78271
Q63081	Protein disulfide-isomerase A6 OS=Rattus norvegicus GN=Pdia6 PE=1 SV=2 - [PDIA6_RAT]	9.56153	7.05	1	2	2	3	1.70774e+06	440	48.1433	5.13525
M0RBW0	Protein Flg2 OS=Rattus norvegicus GN=Flg2 PE=4 SV=1 - [M0RBW0_RAT]	9.42765	6.56	1	1	1	3	5.51019e+06	259	29.9946	7.03467
M0R4B8	Pyruvate kinase OS=Rattus norvegicus PE=3 SV=1 - [M0R4B8_RAT]	9.29388	12.32	4	1	4	6	1.00978e+07	487	52.8544	7.82568
Q9EPH8	Polyadenylate-binding protein 1 OS=Rattus norvegicus GN=Pabpc1 PE=1 SV=1 - [PABP1_RAT]	9.05731	5.03	4	3	3	4	2.03047e+06	636	70.6559	9.49561
P00762	Anionic trypsin-1 OS=Rattus norvegicus GN=Prss1 PE=1 SV=1 - [TRY1_RAT]	9.03761	8.13	1	1	1	2	7.22439e+08	246	25.9427	4.89404
Q62950	Dihydropyrimidinase-related protein 1 OS=Rattus norvegicus GN=Crmp1 PE=1 SV=1 - [DPYL1_RAT]	8.78682	4.02	1	1	2	3	3.19777e+06	572	62.1566	7.12256
D3ZJ50	Plakophilin 3 (Predicted), isoform CRA_a OS=Rattus norvegicus GN=Pkp3 PE=4 SV=1 - [D3ZJ50_RAT]	8.68177	4.01	1	3	3	3	1.42063e+06	822	89.8421	9.51025
Q68FP1	Gelsolin OS=Rattus norvegicus GN=Gsn PE=1 SV=1 - [GELS_RAT]	8.57006	3.85	1	2	2	3	1.52429e+06	780	86.0141	6.0874
A1EC97	Dual specificity phosphatase 14 OS=Rattus norvegicus GN=Dusp14 PE=2 SV=1 - [A1EC97_RAT]	8.53438	17.68	2	2	2	3	8.51958e+06	198	22.2526	9.53955
D4ABT0	Guanine nucleotide-binding protein G(o) subunit alpha OS=Rattus norvegicus GN=Gnao1 PE=4 SV=2 - [D4ABT0_RAT]	8.4814	7.34	17	2	2	3	7.32935e+06	354	39.995	6.01123
F1M9V7	Protein Npepps OS=Rattus norvegicus GN=Npepps PE=4 SV=1 - [F1M9V7_RAT]	8.43633	2.39	2	2	2	3	1.1878e+06	920	103.279	5.77002
P35704	Peroxiredoxin-2 OS=Rattus norvegicus GN=Prdx2 PE=1 SV=3 - [PRDX2_RAT]	8.13457	13.13	1	3	3	4	2.27059e+07	198	21.7701	5.59229
P61765	Syntaxin-binding protein 1 OS=Rattus norvegicus GN=Stxbp1 PE=1 SV=1 - [STXB1_RAT]	8.09866	3.54	1	2	2	3	9.72064e+06	594	67.5259	6.96143
D4A5U3	Protein-glutamine gamma-glutamyltransferase E OS=Rattus norvegicus GN=Tgm3 PE=3 SV=1 - [TGM3_RAT]	8.04149	4.04	1	2	2	3	2.77086e+06	693	77.182	6.88818
G3V988	Keratin, type I cytoskeletal 39 OS=Rattus norvegicus GN=Krt39 PE=3 SV=1 - [G3V988_RAT]	7.7231	4.57	2	1	3	3	5.2198e+08	481	54.2888	5.35107
F1LQ63	Tenascin-R OS=Rattus norvegicus GN=Tnr PE=4 SV=2 - [F1LQ63_RAT]	7.59852	2.37	3	2	2	3	1.35952e+06	1266	139.342	4.89404
Q19LA7	Vesicle-associated membrane protein 2 (Fragment) OS=Rattus norvegicus PE=2 SV=1 - [Q19LA7_RAT]	7.55919	48.57	5	1	1	2	1.40257e+06	35	4.03711	9.31982
P63322	Ras-related protein Ral-A OS=Rattus norvegicus GN=Rala PE=1 SV=1 - [RALA_RAT]	7.49855	7.28	1	1	1	3	2.51029e+06	206	23.538	7.10791
Q3KRD8	Eukaryotic translation initiation factor 6 OS=Rattus norvegicus GN=Eif6 PE=2 SV=1 - [IF6_RAT]	7.48027	9.8	1	1	1	2	1.78663e+06	245	26.5542	4.7417
Q62952	Dihydropyrimidinase-related protein 3 OS=Rattus norvegicus GN=Dpysl3 PE=1 SV=2 - [DPYL3_RAT]	7.46434	5.09	1	2	2	4	2.52926e+06	570	61.928	6.49365
O35244	Peroxiredoxin-6 OS=Rattus norvegicus GN=Prdx6 PE=1 SV=3 - [PRDX6_RAT]	7.37979	5.36	1	1	1	3	4.17914e+06	224	24.803	5.93506
F7FLF2	Protein LOC100360057 (Fragment) OS=Rattus norvegicus GN=LOC100363800 PE=4 SV=1 - [F7FLF2_RAT]	7.37204	18.9	3	2	2	3	2.84483e+06	127	14.6487	9.18799
Q6S3A1	Plectin 4 OS=Rattus norvegicus PE=2 SV=1 - [Q6S3A1_RAT]	7.34764	1.39	14	4	5	5	1.06829e+07	4451	506.371	5.68115
B0BN81	40S ribosomal protein S5 OS=Rattus norvegicus GN=Rps5 PE=2 SV=1 - [B0BN81_RAT]	7.34259	13.73	2	2	2	2	2.01562e+06	204	22.8921	9.71533
G3V7J7	Eukaryotic translation initiation factor 5A2 (Predicted) OS=Rattus norvegicus GN=Eif5a2 PE=4 SV=1 - [G3V7J7_RAT]	7.20315	12.42	3	2	2	3	2.48801e+06	153	16.7822	5.57959
B2GV69	Hnrnpa2b1 protein (Fragment) OS=Rattus norvegicus GN=Hnrnpa2b1 PE=2 SV=1 - [B2GV69_RAT]	7.11328	8.43	5	1	1	3	1.82062e+06	178	18.3735	9.42236
G3V774	F-box only protein 2 OS=Rattus norvegicus GN=Fbxo2 PE=4 SV=1 - [G3V774_RAT]	7.07215	9.12	2	2	2	2	5.01846e+06	296	33.6519	4.33545
P24268	Cathepsin D OS=Rattus norvegicus GN=Ctsd PE=1 SV=1 - [CATD_RAT]	7.06097	4.42	2	1	1	2	1.12594e+07	407	44.6519	7.09326
P19804	Nucleoside diphosphate kinase B OS=Rattus norvegicus GN=Nme2 PE=1 SV=1 - [NDKB_RAT]	6.98184	23.03	4	3	3	4	7.57905e+06	152	17.2719	7.44482
P19944	60S acidic ribosomal protein P1 OS=Rattus norvegicus GN=Rplp1 PE=3 SV=1 - [RLA1_RAT]	6.92911	14.04	1	1	1	2	3.54637e+06	114	11.4907	4.32275
D3ZKA0	Protein Serpinb13 OS=Rattus norvegicus GN=Serpinb13 PE=3 SV=1 - [D3ZKA0_RAT]	6.92702	3.08	1	1	1	2	4.19388e+07	389	44.2215	5.92236
P62890	60S ribosomal protein L30 OS=Rattus norvegicus GN=Rpl30 PE=3 SV=2 - [RL30_RAT]	6.91103	33.91	1	3	3	4	3.32651e+06	115	12.7757	9.62744
Q03336	Regucalcin OS=Rattus norvegicus GN=Rgn PE=1 SV=3 - [RGN_RAT]	6.76812	9.03	1	2	2	2	2.40683e+06	299	33.3684	5.46533
Q91XL4	G-protein beta-2 subunit (Fragment) OS=Rattus norvegicus PE=2 SV=1 - [Q91XL4_RAT]	6.74159	5.33	3	1	1	3	2.51762e+06	225	24.4277	5.36377
P11598	Protein disulfide-isomerase A3 OS=Rattus norvegicus GN=Pdia3 PE=1 SV=2 - [PDIA3_RAT]	6.72536	6.34	1	3	3	3	3.67271e+06	505	56.5877	6.21436
P60901	Proteasome subunit alpha type-6 OS=Rattus norvegicus GN=Psma6 PE=1 SV=1 - [PSA6_RAT]	6.7062	13.01	1	3	3	3	2853994	246	27.3818	6.75635
P60881	Synaptosomal-associated protein 25 OS=Rattus norvegicus GN=Snap25 PE=1 SV=1 - [SNP25_RAT]	6.64856	18.45	1	3	3	3	1.10762e+06	206	23.3002	4.76709
Q9Z2L0	Voltage-dependent anion-selective channel protein 1 OS=Rattus norvegicus GN=Vdac1 PE=1 SV=4 - [VDAC1_RAT]	6.63594	8.48	2	2	2	3	1.78579e+06	283	30.7366	8.54346
M0R995	Uncharacterized protein (Fragment) OS=Rattus norvegicus PE=4 SV=1 - [M0R995_RAT]	6.61821	5.39	12	1	1	2	2.00411e+06	241	27.2091	10.2866
P62963	Profilin-1 OS=Rattus norvegicus GN=Pfn1 PE=1 SV=2 - [PROF1_RAT]	6.61115	18.57	1	2	2	2	3.84769e+06	140	14.9475	8.27979
D3ZFG5	Protein Pmp2 OS=Rattus norvegicus GN=Pmp2 PE=3 SV=1 - [D3ZFG5_RAT]	6.57875	9.85	1	1	1	2	9.09986e+07	132	14.9429	9.5835
F1LRV4	Heat shock 70 kDa protein 4 OS=Rattus norvegicus GN=Hspa4 PE=3 SV=1 - [F1LRV4_RAT]	6.35221	1.79	2	1	1	2	1.00012e+06	840	93.9671	5.21143
C9WPN2	DEAD (Asp-Glu-Ala-Asp) box polypeptide 3 Y-linked OS=Rattus norvegicus GN=Ddx3 PE=2 SV=1 - [C9WPN2_RAT]	6.3233	5.21	4	3	3	3	2.51242e+06	652	72.9609	7.10791
D3ZV50	Protein LOC100364509 OS=Rattus norvegicus GN=LOC100364509 PE=4 SV=1 - [D3ZV50_RAT]	6.28728	8.25	3	2	2	3	4.33951e+06	194	22.6335	10.3159
Q6P7A4	Prosaposin OS=Rattus norvegicus GN=Psap PE=2 SV=1 - [Q6P7A4_RAT]	6.22218	1.99	3	1	1	3	3.28876e+06	553	60.9995	5.24951
Q62813	Limbic system-associated membrane protein OS=Rattus norvegicus GN=Lsamp PE=1 SV=1 - [LSAMP_RAT]	6.18074	7.1	2	2	2	2	2.95756e+06	338	37.3012	6.68311
Q6P6G9	Hnrpa1 protein OS=Rattus norvegicus GN=Hnrnpa1 PE=2 SV=1 - [Q6P6G9_RAT]	6.01345	9.9	6	2	2	2	3.75117e+06	313	33.599	9.23193
M0RD40	Protein Sik3 OS=Rattus norvegicus GN=Sik3 PE=1 SV=1 - [M0RD40_RAT]	5.99711	1.17	1	1	1	2	5.1951e+07	1366	150.569	7.00537
G3V6X7	Proprotein convertase subtilisin/kexin type 1 inhibitor OS=Rattus norvegicus GN=Pcsk1n PE=4 SV=1 - [G3V6X7_RAT]	5.95933	8.46	2	2	2	3	5.08993e+06	260	27.4558	5.59229
P62161	Calmodulin OS=Rattus norvegicus GN=Calm1 PE=1 SV=2 - [CALM_RAT]	5.95793	22.15	4	3	3	4	3.41513e+06	149	16.8268	4.22119
F1M978	Inositol monophosphatase 1 OS=Rattus norvegicus GN=Impa1 PE=4 SV=1 - [F1M978_RAT]	5.90011	4.33	2	1	1	2		277	30.4754	5.2876
Q6IFT2	Type II keratin Kb40 (Fragment) OS=Rattus norvegicus GN=Krt78 PE=2 SV=1 - [Q6IFT2_RAT]	5.84908	2.46	3	1	1	2	1.23439e+07	488	54.2261	5.66846
Q5PPJ3	Claudin OS=Rattus norvegicus GN=Cldn9 PE=2 SV=1 - [Q5PPJ3_RAT]	5.81742	7.37	2	1	1	2	1.63661e+06	217	22.8821	7.06396
D3ZPR0	Chromosome segregation 1-like (S. cerevisiae) (Predicted) OS=Rattus norvegicus GN=Cse1l PE=4 SV=1 - [D3ZPR0_RAT]	5.70705	0.82	1	1	1	3	1.73235e+08	971	110.144	5.77002
P17132	Heterogeneous nuclear ribonucleoprotein C (Fragment) OS=Rattus norvegicus GN=Hnrnpc PE=2 SV=1 - [HNRPC_RAT]	5.62007	8.86	5	1	1	2	3.24837e+06	158	18.0082	9.65674
P01186	Vasopressin-neurophysin 2-copeptin OS=Rattus norvegicus GN=Avp PE=1 SV=1 - [NEU2_RAT]	5.00738	10.12	1	1	1	2	1.29449e+06	168	17.9104	6.41748
P53534	Glycogen phosphorylase, brain form (Fragment) OS=Rattus norvegicus GN=Pygb PE=1 SV=3 - [PYGB_RAT]	4.96153	2.39	7	2	2	3	3.48889e+06	838	96.1131	6.68311
A0A096MJI9	Sodium/potassium-transporting ATPase subunit beta-1 OS=Rattus norvegicus GN=Atp1b1 PE=4 SV=2 - [A0A096MJI9_RAT]	4.94817	17.48	2	2	2	2	4.84351e+06	143	16.5694	7.73779
Q5RKJ9	RAB10, member RAS oncogene family OS=Rattus norvegicus GN=Rab10 PE=2 SV=1 - [Q5RKJ9_RAT]	4.94566	11	34	2	2	2	2.78333e+06	200	22.5266	8.38232
Q6P6V0	Glucose-6-phosphate isomerase OS=Rattus norvegicus GN=Gpi PE=1 SV=1 - [G6PI_RAT]	4.82833	5.2	1	2	2	2	1.6566e+06	558	62.7871	7.76709
P06349	Histone H1t OS=Rattus norvegicus GN=Hist1h1t PE=1 SV=2 - [H1T_RAT]	4.82565	5.29	3	1	1	2	6.04314e+07	208	21.7122	11.7808
D3ZA32	Protein Gsdma OS=Rattus norvegicus GN=Gsdma PE=4 SV=1 - [D3ZA32_RAT]	4.81148	6.73	1	3	3	3	8.59687e+06	446	49.7829	5.41455
P13221	Aspartate aminotransferase, cytoplasmic OS=Rattus norvegicus GN=Got1 PE=1 SV=3 - [AATC_RAT]	4.70223	5.33	1	2	2	2	1.20181e+07	413	46.3995	7.21045
O08557	N(G),N(G)-dimethylarginine dimethylaminohydrolase 1 OS=Rattus norvegicus GN=Ddah1 PE=1 SV=3 - [DDAH1_RAT]	4.61673	3.51	1	1	1	2	2.88228e+06	285	31.4059	6.12549
D3ZK18	Uncharacterized protein (Fragment) OS=Rattus norvegicus PE=4 SV=2 - [D3ZK18_RAT]	4.61388	6.45	2	1	1	2	2.16119e+06	186	20.8333	9.51025
M0RD29	Uncharacterized protein (Fragment) OS=Rattus norvegicus PE=3 SV=1 - [M0RD29_RAT]	4.58406	3.63	2	1	1	2	3.35266e+06	303	32.7546	5.57959
Q6TXF7	LRRGT00042 OS=Rattus norvegicus PE=2 SV=1 - [Q6TXF7_RAT]	4.56288	4.07	1	1	1	2	8.59e+06	369	40.8562	7.28369
B0K023	Rpl7 protein (Fragment) OS=Rattus norvegicus GN=Rpl7 PE=2 SV=1 - [B0K023_RAT]	4.54462	13	7	3	3	3	2.62706e+06	223	26.1685	10.8579
G3V8C3	Vimentin OS=Rattus norvegicus GN=Vim PE=3 SV=1 - [G3V8C3_RAT]	4.46993	3.65	7	1	2	2	1.18212e+07	466	53.6681	5.12256
Q6W3B0	Desmoglein-4 OS=Rattus norvegicus GN=Dsg4 PE=1 SV=1 - [DSG4_RAT]	4.46689	2.21	1	2	2	2	6.14419e+06	1040	114.294	4.71631
P52296	Importin subunit beta-1 OS=Rattus norvegicus GN=Kpnb1 PE=1 SV=1 - [IMB1_RAT]	4.3729	1.71	2	1	1	1	1.19436e+06	875	97.062	4.76709
G3V7U4	Lamin-B1 OS=Rattus norvegicus GN=Lmnb1 PE=3 SV=1 - [G3V7U4_RAT]	4.37242	1.87	2	1	1	2	834114	587	66.6457	5.16064
M0R6Y8	Phosphoglycerate kinase OS=Rattus norvegicus GN=RGD1560402 PE=3 SV=1 - [M0R6Y8_RAT]	4.36082	10.89	4	3	3	3	5.28442e+06	395	41.9347	6.78564
D4AE10	Protein RGD1563613 OS=Rattus norvegicus GN=RGD1563613 PE=4 SV=1 - [D4AE10_RAT]	4.3173	7.26	4	1	1	2	6.78832e+06	124	13.6837	9.92041
D3ZJ08	Histone H3 OS=Rattus norvegicus GN=Hist2h3c2 PE=3 SV=1 - [D3ZJ08_RAT]	4.30085	13.24	9	2	2	2	5.95971e+07	136	15.3785	11.2681
Q4KLN8	E3 ubiquitin-protein ligase RNF8 OS=Rattus norvegicus GN=Rnf8 PE=2 SV=1 - [RNF8_RAT]	4.28606	1.44	1	1	1	2	70526006	487	55.5794	8.07471
G3V8G4	Brevican core protein OS=Rattus norvegicus GN=Bcan PE=4 SV=1 - [G3V8G4_RAT]	4.28434	0.91	2	1	1	2	3.19545e+06	883	95.9411	4.94482
Q09073	ADP/ATP translocase 2 OS=Rattus norvegicus GN=Slc25a5 PE=1 SV=3 - [ADT2_RAT]	4.24801	7.05	6	2	2	2	3.55877e+06	298	32.8801	9.72998
P02770	Serum albumin OS=Rattus norvegicus GN=Alb PE=1 SV=2 - [ALBU_RAT]	4.17348	3.45	1	2	2	2	4.89492e+07	608	68.6861	6.48096
Q1RP74	Protein LOC100911774 OS=Rattus norvegicus GN=LOC100911774 PE=2 SV=1 - [Q1RP74_RAT]	4.15543	6.56	2	1	1	1	3.59642e+06	244	27.2303	4.99561
D3ZQ45	Protein Dsg1 OS=Rattus norvegicus GN=Dsg1 PE=4 SV=1 - [D3ZQ45_RAT]	4.15176	2.08	3	2	2	2	6.53401e+06	914	100.735	4.83057
O88752	Epsilon 1 globin OS=Rattus norvegicus GN=Hbe1 PE=2 SV=1 - [O88752_RAT]	4.15051	6.8	3	1	1	2	7.7426e+06	147	16.0945	8.17725
F1LP05	ATP synthase subunit alpha OS=Rattus norvegicus GN=Atp5a1 PE=3 SV=1 - [F1LP05_RAT]	4.14687	4.16	2	1	2	2	2.33219e+06	553	59.7757	9.26123
D3ZXL0	Protein Slc26a10 OS=Rattus norvegicus GN=Slc26a10 PE=4 SV=2 - [D3ZXL0_RAT]	4.09186	1.17	1	1	1	2	2.59458e+09	684	73.8763	7.97217
P70564	Serpin B5 OS=Rattus norvegicus GN=Serpinb5 PE=2 SV=1 - [SPB5_RAT]	4.07024	5.07	2	2	2	3	4.53029e+06	375	42.0367	6.1001
Q812E9	Neuronal membrane glycoprotein M6-a OS=Rattus norvegicus GN=Gpm6a PE=1 SV=1 - [GPM6A_RAT]	4.05915	7.55	1	2	2	2	8.15734e+06	278	31.1744	5.2749
P18422	Proteasome subunit alpha type-3 OS=Rattus norvegicus GN=Psma3 PE=1 SV=3 - [PSA3_RAT]	4.01112	12.16	2	3	3	3	1.87918e+06	255	28.4011	5.43994
P50137	Transketolase OS=Rattus norvegicus GN=Tkt PE=1 SV=1 - [TKT_RAT]	3.96847	2.73	2	2	2	2	2.4216e+06	623	67.6006	7.48877
D3ZBN0	Histone H1.5 OS=Rattus norvegicus GN=Hist1h1b PE=3 SV=1 - [H15_RAT]	3.93248	5.41	1	1	1	2	11546080	222	22.6355	10.9604
A0A0A0MY51	Dynamin-1 OS=Rattus norvegicus GN=Dnm1 PE=4 SV=1 - [A0A0A0MY51_RAT]	3.92477	2.09	11	2	2	2	1.3984e+06	814	92.4274	6.93213
M0R544	Glucosidase, alpha, acid, isoform CRA_a OS=Rattus norvegicus GN=Gaa PE=3 SV=1 - [M0R544_RAT]	3.8615	1.89	2	1	1	1	2.0642e+06	953	106.136	5.68115
F1LVD0	Uncharacterized protein (Fragment) OS=Rattus norvegicus GN=LOC690134 PE=3 SV=2 - [F1LVD0_RAT]	3.8023	7.75	3	1	1	2	2.4113e+06	142	16.3607	10.5649
D4ABW9	Protein Trim29 OS=Rattus norvegicus GN=Trim29 PE=4 SV=1 - [D4ABW9_RAT]	3.79858	2.9	1	2	2	2	3.17848e+06	587	65.7315	7.13721
P50399	Rab GDP dissociation inhibitor beta OS=Rattus norvegicus GN=Gdi2 PE=1 SV=2 - [GDIB_RAT]	3.79631	8.31	1	1	3	3	489734	445	50.5047	6.25244
F1LN88	Aldehyde dehydrogenase, mitochondrial OS=Rattus norvegicus GN=Aldh2 PE=3 SV=2 - [F1LN88_RAT]	3.72871	2.7	2	1	1	1	962935	519	56.4807	7.32764
F1LQQ1	Malic enzyme (Fragment) OS=Rattus norvegicus GN=Me1 PE=3 SV=2 - [F1LQQ1_RAT]	3.70145	3.28	2	1	1	1		549	61.0735	5.92236
G3V9A5	Keratinocyte proline-rich protein OS=Rattus norvegicus GN=Kprp PE=4 SV=1 - [G3V9A5_RAT]	3.64867	1.43	2	1	1	2	1.32728e+07	699	76.3621	8.38232
F1LUM5	Protein Tubal3 OS=Rattus norvegicus GN=Tubal3 PE=3 SV=2 - [F1LUM5_RAT]	3.62973	6.28	1	1	2	2	2.36404e+06	382	42.8053	6.02393
P61265	Syntaxin-1B OS=Rattus norvegicus GN=Stx1b PE=1 SV=1 - [STX1B_RAT]	3.61812	4.86	1	1	1	1	1.2544e+06	288	33.2238	5.37646
O70371	Annexin (Fragment) OS=Rattus norvegicus PE=2 SV=1 - [O70371_RAT]	3.58883	6.95	3	2	2	2	1.81402e+06	302	33.9444	5.10986
P09034	Argininosuccinate synthase OS=Rattus norvegicus GN=Ass1 PE=2 SV=1 - [ASSY_RAT]	3.5815	5.58	1	2	2	2	1.5304e+06	412	46.4669	7.78174
M0R6L4	40S ribosomal protein S3a OS=Rattus norvegicus GN=LOC100365839 PE=3 SV=1 - [M0R6L4_RAT]	3.552	3.03	3	1	1	2	2.75376e+06	264	29.8887	9.72998
Q63413	Spliceosome RNA helicase Ddx39b OS=Rattus norvegicus GN=Ddx39b PE=1 SV=3 - [DX39B_RAT]	3.54966	3.27	1	1	1	1	1.26617e+06	428	49.004	5.66846
F1M2I5	Uncharacterized protein OS=Rattus norvegicus GN=Opcml PE=4 SV=2 - [F1M2I5_RAT]	3.50663	4.35	2	1	1	2	5.76473e+06	207	22.5393	5.64307
M0R4I9	Uncharacterized protein (Fragment) OS=Rattus norvegicus PE=4 SV=1 - [M0R4I9_RAT]	3.42188	7.49	2	1	1	1	3.06075e+06	187	21.2206	6.62451
D4ABK7	Heterogeneous nuclear ribonucleoprotein H3 (2H9) (Predicted), isoform CRA_c OS=Rattus norvegicus GN=Hnrnph3 PE=4 SV=1 - [D4ABK7_RAT]	3.38836	4.91	1	1	1	1	680688	346	36.8461	6.87354
Q5XI73	Rho GDP-dissociation inhibitor 1 OS=Rattus norvegicus GN=Arhgdia PE=1 SV=1 - [GDIR1_RAT]	3.28946	7.84	1	1	1	1	4.07559e+06	204	23.3928	5.19873
Q6AY84	Secernin-1 OS=Rattus norvegicus GN=Scrn1 PE=1 SV=1 - [SCRN1_RAT]	3.28356	3.86	1	1	1	1	1.08372e+06	414	46.3666	4.84326
Q3MIE4	Synaptic vesicle membrane protein VAT-1 homolog OS=Rattus norvegicus GN=Vat1 PE=1 SV=1 - [VAT1_RAT]	3.2254	3.71	1	1	1	2	1.33348e+06	404	43.091	6.62451
Q64715	Microtubule-associated protein OS=Rattus norvegicus GN=Map2 PE=2 SV=1 - [Q64715_RAT]	3.20954	0.66	4	1	1	1	496213	1825	198.446	4.84326
P40307	Proteasome subunit beta type-2 OS=Rattus norvegicus GN=Psmb2 PE=1 SV=1 - [PSB2_RAT]	3.19616	7.46	1	1	1	1	1.84124e+06	201	22.8977	7.44482
Q6AYU3	DnaJ homolog subfamily B member 6 OS=Rattus norvegicus GN=Dnajb6 PE=1 SV=1 - [DNJB6_RAT]	3.16129	3.64	1	1	1	1	1.07822e+06	357	38.8984	9.36377
P04762	Catalase OS=Rattus norvegicus GN=Cat PE=1 SV=3 - [CATA_RAT]	3.15595	2.28	1	1	1	1	4.03913e+06	527	59.7195	7.50342
D4ADH2	Protein Pcbp1 (Fragment) OS=Rattus norvegicus GN=Pcbp1 PE=4 SV=2 - [D4ADH2_RAT]	3.15211	4.12	5	1	1	1	3.64015e+06	267	27.9363	8.19189
Q9QX80	CArG-binding factor A OS=Rattus norvegicus GN=Hnrnpab PE=2 SV=1 - [Q9QX80_RAT]	3.08744	4.91	4	1	1	1	502974	285	30.8343	7.91357
Q9JKB7	Guanine deaminase OS=Rattus norvegicus GN=Gda PE=2 SV=1 - [Q9JKB7_RAT]	3.0428	3.08	2	1	1	1	2.29368e+06	454	50.8687	5.71924
Q5XIT8	Claudin OS=Rattus norvegicus GN=Cldn4 PE=2 SV=1 - [Q5XIT8_RAT]	2.97674	5.71	1	1	1	1	3.88841e+06	210	22.4174	8.47021
B5DEY0	Pls1 protein OS=Rattus norvegicus GN=Pls1 PE=2 SV=1 - [B5DEY0_RAT]	2.97483	2.59	4	1	1	1	1.12597e+06	463	51.618	6.46826
G3V9G4	ATP citrate lyase, isoform CRA_b OS=Rattus norvegicus GN=Acly PE=4 SV=1 - [G3V9G4_RAT]	2.97002	1.47	3	1	1	1		1091	119.637	7.44482
F1M0K6	Protein RGD1565566 (Fragment) OS=Rattus norvegicus GN=RGD1565566 PE=3 SV=1 - [F1M0K6_RAT]	2.95099	7.95	2	1	1	1	1.13607e+06	176	20.6358	10.4624
Q0HA14	Rae-like protein (Fragment) OS=Rattus norvegicus GN=Raet1e PE=2 SV=1 - [Q0HA14_RAT]	2.93779	6.44	4	1	1	1	8.70791e+08	202	21.9779	6.84424
F1MAS7	Protein Sdr9c7 OS=Rattus norvegicus GN=Sdr9c7 PE=3 SV=1 - [F1MAS7_RAT]	2.91715	3.83	1	1	1	1	2.93951e+06	313	35.0532	8.90967
Q5I0G4	Glycine--tRNA ligase (Fragment) OS=Rattus norvegicus GN=Gars PE=1 SV=1 - [SYG_RAT]	2.91258	2.04	2	1	1	1	1.10727e+06	637	71.9843	6.07471
D3ZZR8	Protein Krtap3-1 OS=Rattus norvegicus GN=Krtap3-1 PE=4 SV=1 - [D3ZZR8_RAT]	2.90533	17.35	2	1	1	1	9.50038e+06	98	10.2904	5.07178
D3Z8J0	Protein RGD1564425 OS=Rattus norvegicus GN=RGD1564425 PE=4 SV=1 - [D3Z8J0_RAT]	2.87489	7.8	3	1	1	1	1.75526e+06	205	23.0305	6.18896
D3ZE32	Protein Vat1l OS=Rattus norvegicus GN=Vat1l PE=4 SV=2 - [D3ZE32_RAT]	2.86949	2.88	1	1	1	1	2.09254e+06	416	45.651	5.0083
Q9JJ49	Titin (Fragment) OS=Rattus norvegicus PE=2 SV=1 - [Q9JJ49_RAT]	2.86109	8.96	1	1	1	1	3.14728e+07	201	22.3044	5.33838
D4A269	Uncharacterized protein OS=Rattus norvegicus PE=4 SV=1 - [D4A269_RAT]	2.85742	11.11	2	1	1	1	1.82393e+06	126	13.7672	7.59131
Q2I6B2	V-type proton ATPase subunit a OS=Rattus norvegicus GN=Atp6v0a1 PE=2 SV=1 - [Q2I6B2_RAT]	2.84904	1.2	5	1	1	1	794198	832	95.5228	6.7417
Q8VBU2	Protein NDRG2 OS=Rattus norvegicus GN=Ndrg2 PE=1 SV=1 - [NDRG2_RAT]	2.84834	3.77	1	1	1	1	4.96579e+06	371	40.7531	5.30029
M0R6E5	Protein LOC682408 (Fragment) OS=Rattus norvegicus GN=LOC682408 PE=4 SV=1 - [M0R6E5_RAT]	2.8179	2.4	1	1	1	1	1.40391e+07	499	48.902	8.71924
G3V741	Phosphate carrier protein, mitochondrial OS=Rattus norvegicus GN=Slc25a3 PE=3 SV=1 - [G3V741_RAT]	2.80837	3.37	3	1	1	1	1.61273e+06	356	39.5054	9.26123
Q5PPJ7	Psmd1 protein (Fragment) OS=Rattus norvegicus GN=Psmd1 PE=2 SV=1 - [Q5PPJ7_RAT]	2.80626	1.42	5	1	1	1	440114	846	93.2626	6.39209
Q9Z0J8	Neuronal growth regulator 1 OS=Rattus norvegicus GN=Negr1 PE=1 SV=1 - [NEGR1_RAT]	2.79879	3.74	1	1	1	1	3.28956e+06	348	37.8339	6.52197
P62716	Serine/threonine-protein phosphatase 2A catalytic subunit beta isoform OS=Rattus norvegicus GN=Ppp2cb PE=1 SV=1 - [PP2AB_RAT]	2.7891	3.56	2	1	1	1	622679	309	35.5523	5.42725
Q5XHY5	Threonine--tRNA ligase, cytoplasmic OS=Rattus norvegicus GN=Tars PE=2 SV=1 - [SYTC_RAT]	2.78848	1.73	1	1	1	1		695	80.5245	6.94678
G3V6P7	Myosin, heavy polypeptide 9, non-muscle OS=Rattus norvegicus GN=LOC100911597 PE=4 SV=1 - [G3V6P7_RAT]	2.77177	0.82	2	1	1	1	798078	1960	226.273	5.65576
D3ZT84	Alcohol dehydrogenase 6A (Class V) (Predicted) OS=Rattus norvegicus GN=Adh6a PE=3 SV=2 - [D3ZT84_RAT]	2.73169	4.18	1	1	1	1	5.00935e+06	335	35.68	7.10791
D3ZYG4	Protein LOC680370 OS=Rattus norvegicus GN=LOC680370 PE=4 SV=1 - [D3ZYG4_RAT]	2.69242	11.9	1	1	1	1		210	23.7737	10.1841
O35263	Platelet-activating factor acetylhydrolase IB subunit gamma OS=Rattus norvegicus GN=Pafah1b3 PE=2 SV=1 - [PA1B3_RAT]	2.67164	3.88	1	1	1	1	1.39044e+06	232	25.8473	6.93213
F1LSW7	60S ribosomal protein L14 OS=Rattus norvegicus GN=Rpl14 PE=4 SV=1 - [F1LSW7_RAT]	2.66694	5.61	4	1	1	1	894365	214	23.31	11.1069
Q7M767	Ubiquitin-conjugating enzyme E2 variant 2 OS=Rattus norvegicus GN=Ube2v2 PE=1 SV=3 - [UB2V2_RAT]	2.653	6.9	2	1	1	1	2.58753e+06	145	16.3422	8.08936
Q99PV2	Protein Stxbp3 OS=Rattus norvegicus GN=Stxbp3 PE=2 SV=1 - [Q99PV2_RAT]	2.64914	3.2	1	1	1	1	9.93919e+06	593	67.9769	8.01611
D3ZAK7	Protein Ibtk OS=Rattus norvegicus GN=Ibtk PE=4 SV=2 - [D3ZAK7_RAT]	2.62254	0.89	2	1	1	1	5.76084e+06	1344	150.029	7.78174
Q4KM60	Ribosomal protein (Fragment) OS=Rattus norvegicus GN=Rpl10a PE=2 SV=1 - [Q4KM60_RAT]	2.61571	6.31	3	1	1	1	1.79311e+06	206	23.5209	10.0669
Q63716	Peroxiredoxin-1 OS=Rattus norvegicus GN=Prdx1 PE=1 SV=1 - [PRDX1_RAT]	2.61357	14.57	1	3	3	3	4.63301e+06	199	22.0953	8.1333
B2GUZ5	F-actin-capping protein subunit alpha-1 OS=Rattus norvegicus GN=Capza1 PE=1 SV=1 - [CAZA1_RAT]	2.60626	3.5	2	1	1	1	3.41786e+06	286	32.8893	5.69385
F1LTZ6	Protein RGD1559921 (Fragment) OS=Rattus norvegicus GN=RGD1559921 PE=4 SV=1 - [F1LTZ6_RAT]	2.60354	8.04	4	1	1	1	2.72185e+06	112	12.3281	6.771
P12001	60S ribosomal protein L18 OS=Rattus norvegicus GN=Rpl18 PE=2 SV=2 - [RL18_RAT]	2.59315	9.57	3	2	2	2	3.56086e+06	188	21.6452	11.7808
A0JN25	Microtubule-associated protein OS=Rattus norvegicus GN=Mapt PE=2 SV=1 - [A0JN25_RAT]	2.58361	2.92	9	1	1	1	9.54393e+06	343	35.8743	9.43701
D3ZLL8	Protein LOC100909878 OS=Rattus norvegicus GN=Rps15al4 PE=3 SV=1 - [D3ZLL8_RAT]	2.58045	6.92	3	1	1	1	2.42977e+06	130	14.8449	10.1255
F1LUV9	Neural cell adhesion molecule 1 (Fragment) OS=Rattus norvegicus GN=Ncam1 PE=4 SV=2 - [F1LUV9_RAT]	2.5038	1.43	4	1	1	1	3.39502e+06	838	92.254	4.90674
P07171	Calbindin OS=Rattus norvegicus GN=Calb1 PE=1 SV=2 - [CALB1_RAT]	2.49954	4.21	2	1	1	1	4.04423e+06	261	29.9751	4.83057
P51635	Alcohol dehydrogenase [NADP(+)] OS=Rattus norvegicus GN=Akr1a1 PE=1 SV=2 - [AK1A1_RAT]	2.47256	4.62	1	1	1	1	1.09839e+06	325	36.4829	7.31299
M0RBP6	Uncharacterized protein OS=Rattus norvegicus PE=3 SV=1 - [M0RBP6_RAT]	2.46069	3.52	2	1	1	1		596	66.0415	5.90967
D3ZWR4	Copine VII (Predicted), isoform CRA_b OS=Rattus norvegicus GN=Cpne7 PE=4 SV=1 - [D3ZWR4_RAT]	2.45565	1.85	12	1	1	1	1.88306e+06	486	54.0848	5.03369
P21213	Histidine ammonia-lyase OS=Rattus norvegicus GN=Hal PE=1 SV=1 - [HUTH_RAT]	2.44592	2.74	1	2	2	2	2.56585e+06	657	72.2385	6.50732
M0R476	Leucine-rich repeat-containing protein 15 OS=Rattus norvegicus GN=Lrrc15 PE=4 SV=1 - [M0R476_RAT]	2.44338	1.21	2	1	1	2	1.09356e+07	578	64.0867	6.3667
D3ZXK9	Purine nucleoside phosphorylase (Fragment) OS=Rattus norvegicus GN=Pnp PE=4 SV=2 - [D3ZXK9_RAT]	2.40716	3.13	2	1	1	1	1.68827e+06	288	32.1441	7.82568
Q7TP86	Ab1-331 OS=Rattus norvegicus GN=LOC502176 PE=2 SV=1 - [Q7TP86_RAT]	2.39645	5.96	6	1	1	1	2.52641e+06	151	16.8657	9.48096
D3ZHB3	40S ribosomal protein S12 OS=Rattus norvegicus GN=LOC100360573 PE=3 SV=2 - [D3ZHB3_RAT]	2.3824	18.32	7	2	2	2	2.55211e+06	131	14.3764	7.21045
P85968	6-phosphogluconate dehydrogenase, decarboxylating OS=Rattus norvegicus GN=Pgd PE=1 SV=1 - [6PGD_RAT]	2.36736	2.28	3	1	1	1	1.21552e+06	483	53.202	7.02002
P55053	Fatty acid-binding protein, epidermal OS=Rattus norvegicus GN=Fabp5 PE=1 SV=3 - [FABP5_RAT]	2.35601	6.67	1	1	1	1	1.81059e+07	135	15.0495	7.18115
T1SRT4	Radixin isoform OS=Rattus norvegicus GN=Rdx PE=2 SV=1 - [T1SRT4_RAT]	2.35385	2.37	7	1	1	1	1.9361e+06	379	45.2547	8.95361
P85970	Actin-related protein 2/3 complex subunit 2 OS=Rattus norvegicus GN=Arpc2 PE=1 SV=1 - [ARPC2_RAT]	2.3145	6	1	2	2	2	875038	300	34.3695	7.35693
D3ZJZ8	Protein Capn12 OS=Rattus norvegicus GN=Capn12 PE=4 SV=1 - [D3ZJZ8_RAT]	2.28323	1.39	1	1	1	1	1.3234e+06	719	80.3262	6.31592
M0R5M7	Transcription factor BTF3 OS=Rattus norvegicus GN=RGD1563812 PE=3 SV=1 - [M0R5M7_RAT]	2.25988	11.73	2	1	1	2	1.68536e+06	162	17.6732	7.50342
Q7TP89	Peptidyl-prolyl cis-trans isomerase OS=Rattus norvegicus GN=Ppie PE=2 SV=1 - [Q7TP89_RAT]	2.25178	3.53	2	1	1	1	2.35924e+07	255	28.4381	5.69385
P63055	Purkinje cell protein 4 OS=Rattus norvegicus GN=Pcp4 PE=1 SV=2 - [PCP4_RAT]	2.24384	16.13	2	1	1	1	1.57e+06	62	6.80329	6.7124
P50878	60S ribosomal protein L4 OS=Rattus norvegicus GN=Rpl4 PE=1 SV=3 - [RL4_RAT]	2.23532	2.85	2	1	1	1	3.60878e+06	421	47.227	10.9165
D3ZPV8	Protein Ggct OS=Rattus norvegicus GN=Ggct PE=4 SV=1 - [D3ZPV8_RAT]	2.22786	5.85	1	1	1	1	1.09769e+07	188	21.2175	5.43994
D3ZTF6	Phosphatidylinositol 3-kinase, C2 domain containing, alpha polypeptide (Predicted), isoform CRA_a OS=Rattus norvegicus GN=Pik3c2a PE=4 SV=1 - [D3ZTF6_RAT]	2.22035	0.77	1	1	1	1	4.1261e+07	1687	190.793	8.01611
M0R662	Uncharacterized protein (Fragment) OS=Rattus norvegicus PE=4 SV=1 - [M0R662_RAT]	2.19321	7.63	7	1	1	1	4.40622e+06	131	14.8552	9.89111
P24090	Alpha-2-HS-glycoprotein OS=Rattus norvegicus GN=Ahsg PE=1 SV=2 - [FETUA_RAT]	2.19285	1.99	1	1	1	1	1.11148e+07	352	37.9582	6.50732
P12785	Fatty acid synthase OS=Rattus norvegicus GN=Fasn PE=1 SV=3 - [FAS_RAT]	2.17466	0.44	1	1	1	1	961011	2505	272.478	6.39209
P07150	Annexin A1 OS=Rattus norvegicus GN=Anxa1 PE=1 SV=2 - [ANXA1_RAT]	2.17144	3.18	1	1	1	1	1.21148e+06	346	38.8049	7.34229
F1M6N0	Protein LOC686143 OS=Rattus norvegicus GN=LOC686143 PE=4 SV=2 - [F1M6N0_RAT]	2.15573	2.81	1	1	1	1	1.23265e+07	285	29.4177	7.84033
F1M2K3	Small ubiquitin-related modifier (Fragment) OS=Rattus norvegicus PE=3 SV=1 - [F1M2K3_RAT]	2.1506	12.77	3	1	1	1	1.22541e+06	94	10.7484	6.55127
P63170	Dynein light chain 1, cytoplasmic OS=Rattus norvegicus GN=Dynll1 PE=1 SV=1 - [DYL1_RAT]	2.14315	20.22	2	2	2	2	6.73021e+06	89	10.3591	7.40088
D4A4Q3	Protein yippee-like OS=Rattus norvegicus GN=Ypel5 PE=3 SV=1 - [D4A4Q3_RAT]	2.11889	9.92	1	1	1	1	878545	121	13.8328	7.31299
M0R686	Protein Irgq OS=Rattus norvegicus GN=Irgq PE=4 SV=1 - [M0R686_RAT]	2.09896	1.89	1	1	1	1	3.90981e+06	582	59.0677	4.75439
D3Z8D7	Protein LOC100361854 OS=Rattus norvegicus GN=LOC100361854 PE=4 SV=1 - [D3Z8D7_RAT]	2.0805	7.83	2	1	1	1	2.7176e+06	115	12.9981	11.0044
M0R626	Uncharacterized protein (Fragment) OS=Rattus norvegicus PE=4 SV=1 - [M0R626_RAT]	2.06882	6.49	3	1	1	1	1.93946e+06	154	17.6488	8.30908
D3ZTK5	60S ribosomal protein L27 OS=Rattus norvegicus GN=RGD1563835 PE=3 SV=1 - [D3ZTK5_RAT]	2.05983	6.67	3	1	1	1	4.14519e+06	135	15.6325	10.2866
P34064	Proteasome subunit alpha type-5 OS=Rattus norvegicus GN=Psma5 PE=2 SV=1 - [PSA5_RAT]	2.05021	7.88	2	1	1	1	4.47582e+06	241	26.3742	4.85596
D4ABS2	Dynamin-1-like protein (Fragment) OS=Rattus norvegicus GN=Dnm1l PE=3 SV=2 - [D4ABS2_RAT]	2.04798	1.31	2	1	1	1		685	76.7304	7.88428
Q32Q05	Ubiquitin thioesterase OTU1 OS=Rattus norvegicus GN=Yod1 PE=2 SV=1 - [OTU1_RAT]	2.04002	4.37	1	1	1	2	2.43802e+06	343	37.3788	5.92236
Q4V8E7	Protein Tex21 OS=Rattus norvegicus GN=Tex21 PE=2 SV=1 - [Q4V8E7_RAT]	2.03627	3.44	1	1	1	1	3.36084e+06	524	60.3027	7.81104
Q6LDG5	Hypoxanthine-guanine phosporibosyltransferase (Fragment) OS=Rattus norvegicus GN=Hprt1 PE=2 SV=1 - [Q6LDG5_RAT]	2.03228	8.13	3	1	1	1	524855	160	17.8724	8.74854
P80254	D-dopachrome decarboxylase OS=Rattus norvegicus GN=Ddt PE=1 SV=3 - [DOPD_RAT]	2.02671	9.32	1	1	1	1	1.98719e+06	118	13.1248	6.53662
P35559	Insulin-degrading enzyme OS=Rattus norvegicus GN=Ide PE=1 SV=1 - [IDE_RAT]	2.02326	0.88	1	1	1	1	963169	1019	117.635	6.60986
B2RYG6	Ubiquitin thioesterase OTUB1 OS=Rattus norvegicus GN=Otub1 PE=1 SV=1 - [OTUB1_RAT]	2.0168	3.69	1	1	1	1	1.89764e+06	271	31.2504	4.94482
D3Z7Z9	Uncharacterized protein (Fragment) OS=Rattus norvegicus PE=4 SV=2 - [D3Z7Z9_RAT]	2.01057	10.26	10	1	1	2	2.77964e+06	156	17.9014	9.75928
P23928	Alpha-crystallin B chain OS=Rattus norvegicus GN=Cryab PE=1 SV=1 - [CRYAB_RAT]	2.005	10.86	1	2	2	2	6.20939e+06	175	20.0763	7.32764
M0RD35	Uncharacterized protein OS=Rattus norvegicus PE=3 SV=1 - [M0RD35_RAT]	2.001	5.59	4	1	1	1	4.5995e+06	161	17.4873	9.26123
Q00981	Ubiquitin carboxyl-terminal hydrolase isozyme L1 OS=Rattus norvegicus GN=Uchl1 PE=1 SV=2 - [UCHL1_RAT]	2.00064	8.07	1	2	2	2	5.23165e+06	223	24.8224	5.23682
D3ZJF8	Protein Fcgbp OS=Rattus norvegicus GN=Fcgbp PE=4 SV=2 - [D3ZJF8_RAT]	1.99788	0.35	1	1	1	1	9.20206e+08	2582	274.806	5.09717
M0RCJ9	Protein LOC100911027 OS=Rattus norvegicus GN=LOC100911027 PE=4 SV=1 - [M0RCJ9_RAT]	1.98124	7.05	2	1	1	1		156	16.7937	4.80518
Q8CGL8	Secretogranin II variant (Fragment) OS=Rattus norvegicus GN=Scg2 PE=2 SV=1 - [Q8CGL8_RAT]	1.97967	2.17	4	1	1	1	2.52049e+06	322	37.1012	4.57666
B0BMZ1	Protein RGD1305587 OS=Rattus norvegicus GN=RGD1305587 PE=2 SV=1 - [B0BMZ1_RAT]	1.9597	10.83	2	1	1	1		120	13.1769	11.4146
P23606	Protein-glutamine gamma-glutamyltransferase K OS=Rattus norvegicus GN=Tgm1 PE=2 SV=1 - [TGM1_RAT]	1.93734	2.55	1	2	2	2	1.348e+06	824	90.7129	6.46826
H7C5Y5	60S ribosomal protein L6 OS=Rattus norvegicus GN=Rpl6 PE=3 SV=1 - [H7C5Y5_RAT]	1.93703	2.69	4	1	1	1	3.90513e+06	297	33.6309	10.6968
D4A9I5	Interleukin 1 family, member 10 (Predicted) OS=Rattus norvegicus GN=Il1f10 PE=3 SV=1 - [D4A9I5_RAT]	1.92818	3.95	1	1	1	1	2.45628e+06	152	17.0704	5.13525
D3ZEF5	Protein LOC301861 OS=Rattus norvegicus GN=LOC301861 PE=3 SV=1 - [D3ZEF5_RAT]	1.92695	3.08	2	1	1	1		389	43.7793	6.16357
F1M3X5	Protein Mroh6 OS=Rattus norvegicus GN=Mroh6 PE=4 SV=2 - [F1M3X5_RAT]	1.91237	1.11	1	1	1	1	1.80526e+07	722	78.1321	8.63135
Q68FS2	COP9 signalosome complex subunit 4 OS=Rattus norvegicus GN=Cops4 PE=1 SV=1 - [CSN4_RAT]	1.90907	1.72	1	1	1	2	1553095734	406	46.2607	5.84619
Q4V8I6	Ribosomal protein L11 OS=Rattus norvegicus GN=Rpl11 PE=2 SV=1 - [Q4V8I6_RAT]	1.90324	5.39	2	1	1	1	1.22824e+06	167	19.0121	9.80322
P83732	60S ribosomal protein L24 OS=Rattus norvegicus GN=Rpl24 PE=2 SV=1 - [RL24_RAT]	1.90064	5.1	2	1	1	1	2.51236e+06	157	17.7679	11.2534
Q6UE39	Polypeptide N-acetylgalactosaminyltransferase 13 OS=Rattus norvegicus GN=Galnt13 PE=2 SV=1 - [GLT13_RAT]	1.89718	1.08	2	1	1	1	9.15868e+06	556	63.9071	6.82959
D3ZAV9	Uncharacterized protein OS=Rattus norvegicus PE=3 SV=1 - [D3ZAV9_RAT]	1.89307	4.23	2	1	1	1	2.55067e+06	213	24.0439	9.96436
F1M2F6	Pyruvate kinase (Fragment) OS=Rattus norvegicus PE=3 SV=2 - [F1M2F6_RAT]	1.88659	1.78	1	1	1	1	8.85115e+07	505	55.0645	7.40088
D3ZWB4	Protein Spata13 OS=Rattus norvegicus GN=Spata13 PE=4 SV=2 - [D3ZWB4_RAT]	1.88633	0.64	1	1	1	1	1.64251e+08	1247	137.929	7.75244
P19132	Ferritin heavy chain OS=Rattus norvegicus GN=Fth1 PE=1 SV=3 - [FRIH_RAT]	1.88125	3.85	7	1	1	1	1.1382e+06	182	21.1133	6.30322
Q5EB87	Zer1 protein (Fragment) OS=Rattus norvegicus GN=Zer1 PE=2 SV=1 - [Q5EB87_RAT]	1.86434	23.08	2	1	1	1	1.38367e+07	52	6.12208	8.00146
F1M7V4	Protein piccolo (Fragment) OS=Rattus norvegicus GN=Pclo PE=4 SV=2 - [F1M7V4_RAT]	1.85831	0.23	3	1	1	1	1.30636e+08	3885	426.078	5.52881
Q0ZFS8	Protein Srsf3 OS=Rattus norvegicus GN=LOC100910660 PE=2 SV=1 - [Q0ZFS8_RAT]	1.85592	5.49	1	1	1	1	3.27529e+06	164	19.3179	11.6489
P30919	N(4)-(Beta-N-acetylglucosaminyl)-L-asparaginase OS=Rattus norvegicus GN=Aga PE=1 SV=2 - [ASPG_RAT]	1.82596	3.48	1	1	1	1	1.07956e+06	345	37.1434	7.18115
Q9QYL8	Acyl-protein thioesterase 2 OS=Rattus norvegicus GN=Lypla2 PE=1 SV=1 - [LYPA2_RAT]	1.80201	3.46	1	1	1	1	2.14466e+06	231	24.7907	7.2251
D4A3S5	Protein Herc1 (Fragment) OS=Rattus norvegicus GN=Herc1 PE=4 SV=2 - [D4A3S5_RAT]	1.79137	0.34	1	1	1	1	5982956	3276	358.502	6.29053
D3ZIP1	Protein Kcnrg OS=Rattus norvegicus GN=Kcnrg PE=4 SV=1 - [D3ZIP1_RAT]	1.78989	3.36	1	1	1	1	4.82478e+06	268	30.0095	8.29443
P62828	GTP-binding nuclear protein Ran OS=Rattus norvegicus GN=Ran PE=1 SV=3 - [RAN_RAT]	1.78001	5.09	3	1	1	1	1.761e+06	216	24.4076	7.48877
D3ZQE7	Protein Jakmip2 OS=Rattus norvegicus GN=Jakmip2 PE=4 SV=2 - [D3ZQE7_RAT]	1.76167	1.05	1	1	1	1	1.24222e+07	857	100.184	7.66455
M0R9D5	Protein Ahnak OS=Rattus norvegicus GN=Ahnak PE=1 SV=1 - [M0R9D5_RAT]	1.75354	2.85	6	1	1	2	3.22835e+06	5363	571.304	6.22705
G3V7S0	Folate hydrolase OS=Rattus norvegicus GN=Folh1 PE=4 SV=1 - [G3V7S0_RAT]	1.74324	2.26	2	1	1	1	2.62877e+06	752	84.5729	7.66455
D4ACB8	Chaperonin subunit 8 (Theta) (Predicted), isoform CRA_a OS=Rattus norvegicus GN=Cct8 PE=3 SV=1 - [D4ACB8_RAT]	1.74258	2.55	1	1	1	1	1.29572e+06	548	59.5505	5.5415
P62747	Rho-related GTP-binding protein RhoB OS=Rattus norvegicus GN=Rhob PE=1 SV=1 - [RHOB_RAT]	1.7423	4.08	1	1	1	2	4.06688e+06	196	22.1091	5.23682
F1LQW3	Protein Sfpq (Fragment) OS=Rattus norvegicus GN=Sfpq PE=4 SV=1 - [F1LQW3_RAT]	1.7416	4.62	2	2	2	2	1.57628e+06	606	65.6544	8.80713
G3V7Q6	Proteasome subunit beta type OS=Rattus norvegicus GN=Psmb5 PE=3 SV=1 - [G3V7Q6_RAT]	1.73568	3.04	2	1	1	1	3.36974e+06	263	28.5412	7.02002
B5DFG5	Protein Sept6 OS=Rattus norvegicus GN=Sept6 PE=2 SV=1 - [B5DFG5_RAT]	1.73423	2.11	10	1	1	1	748072	427	48.7478	6.66846
M0RC45	Protein LOC683536 OS=Rattus norvegicus GN=LOC683536 PE=4 SV=1 - [M0RC45_RAT]	1.71606	7.28	3	1	1	1	1.42138e+06	151	16.9398	6.771
D3ZVL4	Protein RGD1564308 OS=Rattus norvegicus GN=RGD1564308 PE=4 SV=2 - [D3ZVL4_RAT]	1.71011	4.11	1	1	1	1	2.59195e+06	316	35.388	9.71533
Q5XI32	F-actin-capping protein subunit beta OS=Rattus norvegicus GN=Capzb PE=1 SV=1 - [CAPZB_RAT]	1.70846	8.82	1	2	2	2	1.96603e+06	272	30.6094	5.99854
D3ZHS5	Protein Cpa4 OS=Rattus norvegicus GN=Cpa4 PE=4 SV=1 - [D3ZHS5_RAT]	1.67988	1.9	1	1	1	1	6.8321e+06	421	47.3557	6.60986
Q4G031	Dhx57 protein (Fragment) OS=Rattus norvegicus GN=Dhx57 PE=2 SV=1 - [Q4G031_RAT]	1.66607	2.63	2	1	1	1	2.34648e+07	342	38.0599	8.76318
Q6IN37	GM2 ganglioside activator OS=Rattus norvegicus GN=Gm2a PE=2 SV=1 - [Q6IN37_RAT]	1.62852	3.52	2	1	1	1	3.3062e+06	199	21.4792	6.52197
P18421	Proteasome subunit beta type-1 OS=Rattus norvegicus GN=Psmb1 PE=1 SV=3 - [PSB1_RAT]	1.60988	3.75	2	1	1	1	2.76359e+06	240	26.4623	7.35693
P07824	Arginase-1 OS=Rattus norvegicus GN=Arg1 PE=1 SV=2 - [ARGI1_RAT]	0	3.41	1	1	1	1	8.50147e+06	323	34.9513	7.25439
P18418	Calreticulin OS=Rattus norvegicus GN=Calr PE=1 SV=1 - [CALR_RAT]	0	1.68	3	1	1	1	1.38208e+07	416	47.9658	4.48779
P26772	10 kDa heat shock protein, mitochondrial OS=Rattus norvegicus GN=Hspe1 PE=1 SV=3 - [CH10_RAT]	0	11.76	2	1	1	1	2.32442e+06	102	10.8949	8.92432
P97846	Contactin-associated protein 1 OS=Rattus norvegicus GN=Cntnap1 PE=1 SV=1 - [CNTP1_RAT]	0	1.38	1	1	1	1	2.5881e+07	1381	155.769	6.99072
Q68FR6	Elongation factor 1-gamma OS=Rattus norvegicus GN=Eef1g PE=1 SV=3 - [EF1G_RAT]	0	2.29	1	1	1	1	2.7789e+06	437	50.0292	6.7417
P0C0K7	Ephrin type-B receptor 6 OS=Rattus norvegicus GN=Ephb6 PE=3 SV=3 - [EPHB6_RAT]	0	0.79	1	1	1	1		1013	110.243	6.82959
P07483	Fatty acid-binding protein, heart OS=Rattus norvegicus GN=Fabp3 PE=1 SV=2 - [FABPH_RAT]	0	6.77	1	1	1	1	1.09617e+06	133	14.7656	6.32861
Q6TXF5	Leucine-rich repeat-containing protein 66 OS=Rattus norvegicus GN=Lrrc66 PE=2 SV=1 - [LRC66_RAT]	0	0.69	1	1	1	1	10219265	865	95.929	5.52881
P13832	Myosin regulatory light chain RLC-A OS=Rattus norvegicus GN=Rlc-a PE=2 SV=2 - [MRLCA_RAT]	0	5.81	1	1	1	1	1.0839e+06	172	19.8825	4.80518
Q6TRW4	Sister chromatid cohesion protein PDS5 homolog B OS=Rattus norvegicus GN=Pds5b PE=2 SV=2 - [PDS5B_RAT]	0	1.59	1	1	1	1	2.54096e+06	1447	164.355	8.52881
Q4KLH6	Centrosomal protein of 162 kDa OS=Rattus norvegicus GN=Cep162 PE=1 SV=2 - [CE162_RAT]	0	0.64	1	1	1	1	1.30636e+08	1403	160.903	5.73193
P62278	40S ribosomal protein S13 OS=Rattus norvegicus GN=Rps13 PE=1 SV=2 - [RS13_RAT]	0	9.93	2	1	1	2	3.30065e+06	151	17.2117	10.5356
Q63089	Solute carrier family 22 member 1 OS=Rattus norvegicus GN=Slc22a1 PE=1 SV=1 - [S22A1_RAT]	0	2.88	1	1	1	1	7.35333e+06	556	61.5006	6.11279
O88446	Solute carrier family 22 member 3 OS=Rattus norvegicus GN=Slc22a3 PE=2 SV=1 - [S22A3_RAT]	0	4.17	1	1	1	1		551	61.01	8.14795
Q9WVR3	Phosphatidylinositol 3,4,5-trisphosphate 5-phosphatase 2 OS=Rattus norvegicus GN=Inppl1 PE=1 SV=1 - [SHIP2_RAT]	0	0.64	1	1	1	1	3.30444e+06	1257	139.056	6.48096
P58775	Tropomyosin beta chain OS=Rattus norvegicus GN=Tpm2 PE=3 SV=1 - [TPM2_RAT]	0	3.17	1	1	1	1	341902	284	32.8166	4.70361
P61078	Ubiquitin-conjugating enzyme E2 D3 OS=Rattus norvegicus GN=Ube2d3 PE=2 SV=1 - [UB2D3_RAT]	0	7.48	1	1	1	1	1.9382e+06	147	16.6764	7.79639
P85972	Vinculin OS=Rattus norvegicus GN=Vcl PE=1 SV=1 - [VINC_RAT]	0	2.06	2	1	1	1	1.32064e+06	1066	116.542	6.0874
D3ZN69	Serine/threonine-protein phosphatase OS=Rattus norvegicus GN=Ppef2 PE=3 SV=1 - [D3ZN69_RAT]	0	1.33	1	1	1	1	5.7499e+06	754	86.4914	7.07861
F1LPQ8	SECIS binding protein 2, isoform CRA_a OS=Rattus norvegicus GN=Secisbp2 PE=4 SV=2 - [F1LPQ8_RAT]	0	0.83	2	1	1	1	2.93682e+08	846	93.2257	8.27979
D3ZKH4	Histone-lysine N-methyltransferase OS=Rattus norvegicus GN=Ash1l PE=4 SV=2 - [D3ZKH4_RAT]	0	0.51	1	1	1	1	2.67506e+08	2918	326.268	9.30518
M0RC73	Protein Naa16 OS=Rattus norvegicus GN=Naa16 PE=4 SV=1 - [M0RC73_RAT]	0	2.08	1	1	1	1	2.36704e+06	864	101.285	8.17725
D3ZIP8	Protein Endod1 OS=Rattus norvegicus GN=Endod1 PE=4 SV=1 - [D3ZIP8_RAT]	0	1.6	1	1	1	1	2.99368e+06	500	54.6834	6.45557
G3V7W5	Cadherin 20 OS=Rattus norvegicus GN=Cdh20 PE=4 SV=1 - [G3V7W5_RAT]	0	1.87	1	1	1	1	2.53969e+06	801	88.8577	4.71631
B4F7A3	Galectin OS=Rattus norvegicus GN=Lgalsl PE=2 SV=1 - [B4F7A3_RAT]	0	5.23	1	1	1	1	1.37258e+06	172	18.9436	5.35107
F1M5Z5	Anoctamin OS=Rattus norvegicus GN=Ano6 PE=3 SV=2 - [F1M5Z5_RAT]	0	1.13	1	1	1	1	5.8726e+06	799	92.1668	6.68311
G3V9W9	Protein Fat1 OS=Rattus norvegicus GN=Fat1 PE=4 SV=1 - [G3V9W9_RAT]	0	0.13	2	1	1	1	7.35683e+06	4589	505.765	5.0083
Q6P136	Hyou1 protein OS=Rattus norvegicus GN=Hyou1 PE=2 SV=1 - [Q6P136_RAT]	0	0.9	3	1	1	1	1.97538e+06	998	111.151	5.18604
G3V6S2	Aconitate hydratase OS=Rattus norvegicus GN=Aco1 PE=3 SV=1 - [G3V6S2_RAT]	0	0.79	2	1	1	1	5.71742e+06	889	98.1304	7.38623
B6DYQ3	Glutathione S-transferase mu 3 OS=Rattus norvegicus GN=Gstm4 PE=2 SV=1 - [B6DYQ3_RAT]	0	4.17	8	1	1	1	2.15531e+06	216	25.2338	5.93506
F1M956	Diacylglycerol kinase OS=Rattus norvegicus GN=Dgka PE=3 SV=2 - [F1M956_RAT]	0	1.1	2	1	1	1		726	81.5638	6.37939
F1LN75	Septin-9 (Fragment) OS=Rattus norvegicus GN=Sept9 PE=1 SV=2 - [F1LN75_RAT]	0	1.57	1	1	1	1	1.12099e+08	574	64.165	8.11865
F1M0U5	Protein Nbas OS=Rattus norvegicus GN=Nbas PE=4 SV=2 - [F1M0U5_RAT]	0	0.47	1	1	1	1	2.63347e+06	2357	265.634	5.85889
M0R9D9	Uncharacterized protein (Fragment) OS=Rattus norvegicus PE=4 SV=1 - [M0R9D9_RAT]	0	7.66	2	1	1	1		209	22.9773	7.75244
F1LYD4	Protein Ca10 OS=Rattus norvegicus GN=Car10 PE=4 SV=2 - [F1LYD4_RAT]	0	1.68	13	1	1	1	3.26162e+06	297	34.0471	8.08936
D3ZGJ2	Protein Espnl OS=Rattus norvegicus GN=Espnl PE=4 SV=2 - [D3ZGJ2_RAT]	0	1.3	1	1	1	1	2.13642e+07	999	108.319	5.87158
Q63422	Proton-dependent peptide transporter (Fragment) OS=Rattus norvegicus GN=Slc15a1 PE=2 SV=1 - [Q63422_RAT]	0	8.39	3	1	1	1	441855	453	49.8728	8.52881
F1M7M0	FYVE, RhoGEF and PH domain-containing protein 4 OS=Rattus norvegicus GN=Fgd4 PE=4 SV=2 - [F1M7M0_RAT]	0	1.96	2	1	1	1	2.67259e+06	766	86.3122	5.92236
Q498R0	TAF6 RNA polymerase II, TATA box binding protein (TBP)-associated factor OS=Rattus norvegicus GN=Taf6 PE=2 SV=1 - [Q498R0_RAT]	0	1.85	2	1	1	1	2.35412e+06	647	71.1564	8.35303
D4A365	Protein Zbtb40 OS=Rattus norvegicus GN=Zbtb40 PE=4 SV=2 - [D4A365_RAT]	0	1.35	1	1	1	1	2.79477e+06	1255	138.157	6.40479
D3ZZJ4	Protein Ttc21a OS=Rattus norvegicus GN=Ttc21a PE=4 SV=2 - [D3ZZJ4_RAT]	0	0.61	1	1	1	1	1.02647e+06	1314	148.618	6.78564
D3Z822	Protein Atr OS=Rattus norvegicus GN=Atr PE=4 SV=2 - [D3Z822_RAT]	0	0.72	1	1	1	1	3.40308e+06	2642	300.966	7.56201
D3ZBB8	Cytoplasmic dynein 2 heavy chain 1 OS=Rattus norvegicus GN=Dync2h1 PE=4 SV=2 - [D3ZBB8_RAT]	0	0.35	2	2	2	2	5.95059e+07	4303	491.022	6.72705
D3ZRJ7	Protein Lrrk1 OS=Rattus norvegicus GN=Lrrk1 PE=4 SV=2 - [D3ZRJ7_RAT]	0	0.3	1	1	1	1	4.12381e+06	2013	225.303	6.50732
F1M9D3	Protein S1pr3 OS=Rattus norvegicus GN=S1pr3 PE=3 SV=1 - [F1M9D3_RAT]	0	4.49	1	1	1	1	3.63658e+06	379	42.2663	9.53955
F1LY69	Protein Ift140 OS=Rattus norvegicus GN=Ift140 PE=4 SV=2 - [F1LY69_RAT]	0	1.16	1	1	1	1	1.69187e+06	1463	165.774	6.03662
F1M3B3	Protein Phip (Fragment) OS=Rattus norvegicus GN=Phip PE=4 SV=2 - [F1M3B3_RAT]	0	2.05	1	1	1	1	4.17793e+06	1758	199.254	8.80713
F1M8J2	Polyamine-modulated factor 1-binding protein 1 OS=Rattus norvegicus GN=Pmfbp1 PE=4 SV=2 - [F1M8J2_RAT]	0	0.62	2	1	1	1	3.75756e+08	971	113.493	6.25244
A0A096MJ40	Protein Hmcn1 (Fragment) OS=Rattus norvegicus GN=Hmcn1 PE=1 SV=1 - [A0A096MJ40_RAT]	0	0.36	2	1	1	1		4703	509.199	6.59521
