# Supplementary material for: Mysterious inhibitory cell regulator investigated and found likely to be secretogranin II related
Source: PeerJ. 2017 Oct 13;5:e3833. doi: 10.7717/peerj.3833 (PMC5642266; doi:10.7717/peerj.3833)
Supplement: Supplemental Information 17 — Test specifics 213. [file peerj-05-3833-s017.xlsx]

## Sheet: Sheet1
Accession	Description	A5: Area	B5: Area	Score A2	Coverage A2	# Peptides A2	# PSM A2	Score B2	Coverage B2	# Peptides B2	# PSM B2	# AAs	MW [kDa]	calc. pI
P85968	6-phosphogluconate dehydrogenase, decarboxylating OS=Rattus norvegicus GN=Pgd PE=1 SV=1 - [6PGD_RAT]	0	2.59458e+09					2.36736	2.28	1	1	483	53.202	7.02002	A: RIPA Control
Q09073	ADP/ATP translocase 2 OS=Rattus norvegicus GN=Slc25a5 PE=1 SV=3 - [ADT2_RAT]	0	1553095734					4.24801	7.05	2	2	298	32.8801	9.72998	B: RIPA
P51635	Alcohol dehydrogenase [NADP(+)] OS=Rattus norvegicus GN=Akr1a1 PE=1 SV=2 - [AK1A1_RAT]	0	8.70791e+08					2.47256	4.62	1	1	325	36.4829	7.31299
P85970	Actin-related protein 2/3 complex subunit 2 OS=Rattus norvegicus GN=Arpc2 PE=1 SV=1 - [ARPC2_RAT]	0	5.2198e+08					2.3145	6	2	2	300	34.3695	7.35693
P30919	N(4)-(Beta-N-acetylglucosaminyl)-L-asparaginase OS=Rattus norvegicus GN=Aga PE=1 SV=2 - [ASPG_RAT]	0	3.75756e+08					1.82596	3.48	1	1	345	37.1434	7.18115
P09034	Argininosuccinate synthase OS=Rattus norvegicus GN=Ass1 PE=2 SV=1 - [ASSY_RAT]	0	2.93682e+08					3.5815	5.58	2	2	412	46.4669	7.78174
P18418	Calreticulin OS=Rattus norvegicus GN=Calr PE=1 SV=1 - [CALR_RAT]	0	2.67506e+08					0	1.68	1	1	416	47.9658	4.48779
Q5XI32	F-actin-capping protein subunit beta OS=Rattus norvegicus GN=Capzb PE=1 SV=1 - [CAPZB_RAT]	0	1.73235e+08					1.70846	8.82	2	2	272	30.6094	5.99854
P26772	10 kDa heat shock protein, mitochondrial OS=Rattus norvegicus GN=Hspe1 PE=1 SV=3 - [CH10_RAT]	0	1.64251e+08					0	11.76	1	1	102	10.8949	8.92432
P97846	Contactin-associated protein 1 OS=Rattus norvegicus GN=Cntnap1 PE=1 SV=1 - [CNTP1_RAT]	0	1.30636e+08					0	1.38	1	1	1381	155.769	6.99072
P45592	Cofilin-1 OS=Rattus norvegicus GN=Cfl1 PE=1 SV=3 - [COF1_RAT]	0	1.30636e+08					13.1382	15.06	2	5	166	18.5207	8.08936
P23928	Alpha-crystallin B chain OS=Rattus norvegicus GN=Cryab PE=1 SV=1 - [CRYAB_RAT]	0	1.12099e+08					2.005	10.86	2	2	175	20.0763	7.32764
Q68FS2	COP9 signalosome complex subunit 4 OS=Rattus norvegicus GN=Cops4 PE=1 SV=1 - [CSN4_RAT]	0	9.09986e+07					1.90907	1.72	1	2	406	46.2607	5.84619
Q6AYU3	DnaJ homolog subfamily B member 6 OS=Rattus norvegicus GN=Dnajb6 PE=1 SV=1 - [DNJB6_RAT]	0	6.04314e+07					3.16129	3.64	1	1	357	38.8984	9.36377
Q62952	Dihydropyrimidinase-related protein 3 OS=Rattus norvegicus GN=Dpysl3 PE=1 SV=2 - [DPYL3_RAT]	0	5.95059e+07					7.46434	5.09	2	4	570	61.928	6.49365
Q6W3B0	Desmoglein-4 OS=Rattus norvegicus GN=Dsg4 PE=1 SV=1 - [DSG4_RAT]	0	4.1261e+07					4.46689	2.21	2	2	1040	114.294	4.71631
Q63413	Spliceosome RNA helicase Ddx39b OS=Rattus norvegicus GN=Ddx39b PE=1 SV=3 - [DX39B_RAT]	0	3.14728e+07					3.54966	3.27	1	1	428	49.004	5.66846
P63170	Dynein light chain 1, cytoplasmic OS=Rattus norvegicus GN=Dynll1 PE=1 SV=1 - [DYL1_RAT]	0	2.5881e+07					2.14315	20.22	2	2	89	10.3591	7.40088
Q68FR6	Elongation factor 1-gamma OS=Rattus norvegicus GN=Eef1g PE=1 SV=3 - [EF1G_RAT]	0	2.35924e+07					0	2.29	1	1	437	50.0292	6.7417
P05197	Elongation factor 2 OS=Rattus norvegicus GN=Eef2 PE=1 SV=4 - [EF2_RAT]	0	2.34648e+07					52.4217	18.18	14	18	858	95.2229	6.82959
P0C0K7	Ephrin type-B receptor 6 OS=Rattus norvegicus GN=Ephb6 PE=3 SV=3 - [EPHB6_RAT]	0	1.91434e+07					0	0.79	1	1	1013	110.243	6.82959
P07483	Fatty acid-binding protein, heart OS=Rattus norvegicus GN=Fabp3 PE=1 SV=2 - [FABPH_RAT]	0	1.4973e+07					0	6.77	1	1	133	14.7656	6.32861
P12785	Fatty acid synthase OS=Rattus norvegicus GN=Fasn PE=1 SV=3 - [FAS_RAT]	0	1.40391e+07					2.17466	0.44	1	1	2505	272.478	6.39209
P19132	Ferritin heavy chain OS=Rattus norvegicus GN=Fth1 PE=1 SV=3 - [FRIH_RAT]	0	1.38367e+07					1.88125	3.85	1	1	182	21.1133	6.30322
Q6P6V0	Glucose-6-phosphate isomerase OS=Rattus norvegicus GN=Gpi PE=1 SV=1 - [G6PI_RAT]	0	1.38208e+07					4.82833	5.2	2	2	558	62.7871	7.76709
P63245	Guanine nucleotide-binding protein subunit beta-2-like 1 OS=Rattus norvegicus GN=Gnb2l1 PE=1 SV=3 - [GBLP_RAT]	0	11546080					20.3211	19.87	5	8	317	35.0546	7.69385
P50399	Rab GDP dissociation inhibitor beta OS=Rattus norvegicus GN=Gdi2 PE=1 SV=2 - [GDIB_RAT]	0	1.12163e+07					3.79631	8.31	3	3	445	50.5047	6.25244
Q6UE39	Polypeptide N-acetylgalactosaminyltransferase 13 OS=Rattus norvegicus GN=Galnt13 PE=2 SV=1 - [GLT13_RAT]	0	1.09769e+07					1.89718	1.08	1	1	556	63.9071	6.82959
D3ZBN0	Histone H1.5 OS=Rattus norvegicus GN=Hist1h1b PE=3 SV=1 - [H15_RAT]	0	1.09356e+07					3.93248	5.41	1	2	222	22.6355	10.9604
P06349	Histone H1t OS=Rattus norvegicus GN=Hist1h1t PE=1 SV=2 - [H1T_RAT]	0	1.06829e+07					4.82565	5.29	1	2	208	21.7122	11.7808
P17132	Heterogeneous nuclear ribonucleoprotein C (Fragment) OS=Rattus norvegicus GN=Hnrnpc PE=2 SV=1 - [HNRPC_RAT]	0	10219265					5.62007	8.86	1	2	158	18.0082	9.65674
P35559	Insulin-degrading enzyme OS=Rattus norvegicus GN=Ide PE=1 SV=1 - [IDE_RAT]	0	9.93919e+06					2.02326	0.88	1	1	1019	117.635	6.60986
Q3KRD8	Eukaryotic translation initiation factor 6 OS=Rattus norvegicus GN=Eif6 PE=2 SV=1 - [IF6_RAT]	0	9.50038e+06					7.48027	9.8	1	2	245	26.5542	4.7417
Q6TXF5	Leucine-rich repeat-containing protein 66 OS=Rattus norvegicus GN=Lrrc66 PE=2 SV=1 - [LRC66_RAT]	0	9.15868e+06					0	0.69	1	1	865	95.929	5.52881
Q62813	Limbic system-associated membrane protein OS=Rattus norvegicus GN=Lsamp PE=1 SV=1 - [LSAMP_RAT]	0	8.51958e+06					6.18074	7.1	2	2	338	37.3012	6.68311
Q9QYL8	Acyl-protein thioesterase 2 OS=Rattus norvegicus GN=Lypla2 PE=1 SV=1 - [LYPA2_RAT]	0	7.35333e+06					1.80201	3.46	1	1	231	24.7907	7.2251
P13832	Myosin regulatory light chain RLC-A OS=Rattus norvegicus GN=Rlc-a PE=2 SV=2 - [MRLCA_RAT]	0	6.8321e+06					0	5.81	1	1	172	19.8825	4.80518
Q9Z0J8	Neuronal growth regulator 1 OS=Rattus norvegicus GN=Negr1 PE=1 SV=1 - [NEGR1_RAT]	0	6.73021e+06					2.79879	3.74	1	1	348	37.8339	6.52197
Q32Q05	Ubiquitin thioesterase OTU1 OS=Rattus norvegicus GN=Yod1 PE=2 SV=1 - [OTU1_RAT]	0	6.20939e+06					2.04002	4.37	1	2	343	37.3788	5.92236
B2RYG6	Ubiquitin thioesterase OTUB1 OS=Rattus norvegicus GN=Otub1 PE=1 SV=1 - [OTUB1_RAT]	0	6.14419e+06					2.0168	3.69	1	1	271	31.2504	4.94482
O35264	Platelet-activating factor acetylhydrolase IB subunit beta OS=Rattus norvegicus GN=Pafah1b2 PE=1 SV=1 - [PA1B2_RAT]	0	5982956					10.5616	12.23	2	4	229	25.5652	5.92236
O35263	Platelet-activating factor acetylhydrolase IB subunit gamma OS=Rattus norvegicus GN=Pafah1b3 PE=2 SV=1 - [PA1B3_RAT]	0	5.8726e+06					2.67164	3.88	1	1	232	25.8473	6.93213
Q9EPH8	Polyadenylate-binding protein 1 OS=Rattus norvegicus GN=Pabpc1 PE=1 SV=1 - [PABP1_RAT]	0	5.76473e+06					9.05731	5.03	3	4	636	70.6559	9.49561
Q6TRW4	Sister chromatid cohesion protein PDS5 homolog B OS=Rattus norvegicus GN=Pds5b PE=2 SV=2 - [PDS5B_RAT]	0	5.76084e+06					0	1.59	1	1	1447	164.355	8.52881
P62716	Serine/threonine-protein phosphatase 2A catalytic subunit beta isoform OS=Rattus norvegicus GN=Ppp2cb PE=1 SV=1 - [PP2AB_RAT]	0	5.7499e+06					2.7891	3.56	1	1	309	35.5523	5.42725
P10111	Peptidyl-prolyl cis-trans isomerase A OS=Rattus norvegicus GN=Ppia PE=1 SV=2 - [PPIA_RAT]	0	5.71742e+06					15.5086	30.49	3	6	164	17.8628	8.1626
P62963	Profilin-1 OS=Rattus norvegicus GN=Pfn1 PE=1 SV=2 - [PROF1_RAT]	0	5.51019e+06					6.61115	18.57	2	2	140	14.9475	8.27979
P17220	Proteasome subunit alpha type-2 OS=Rattus norvegicus GN=Psma2 PE=1 SV=3 - [PSA2_RAT]	0	5.23165e+06					10.4325	17.09	2	3	234	25.9103	7.43018
Q4KLH6	Centrosomal protein of 162 kDa OS=Rattus norvegicus GN=Cep162 PE=1 SV=2 - [CE162_RAT]	0	5.00935e+06					0	0.64	1	1	1403	160.903	5.73193
P63322	Ras-related protein Ral-A OS=Rattus norvegicus GN=Rala PE=1 SV=1 - [RALA_RAT]	0	4.91275e+06					7.49855	7.28	1	3	206	23.538	7.10791
P62828	GTP-binding nuclear protein Ran OS=Rattus norvegicus GN=Ran PE=1 SV=3 - [RAN_RAT]	0	4.82478e+06					1.78001	5.09	1	1	216	24.4076	7.48877
Q03336	Regucalcin OS=Rattus norvegicus GN=Rgn PE=1 SV=3 - [RGN_RAT]	0	4.5995e+06					6.76812	9.03	2	2	299	33.3684	5.46533
P62747	Rho-related GTP-binding protein RhoB OS=Rattus norvegicus GN=Rhob PE=1 SV=1 - [RHOB_RAT]	0	4.53029e+06					1.7423	4.08	1	2	196	22.1091	5.23682
P12001	60S ribosomal protein L18 OS=Rattus norvegicus GN=Rpl18 PE=2 SV=2 - [RL18_RAT]	0	4.48574e+06					2.59315	9.57	2	2	188	21.6452	11.7808
P83732	60S ribosomal protein L24 OS=Rattus norvegicus GN=Rpl24 PE=2 SV=1 - [RL24_RAT]	0	4.40622e+06					1.90064	5.1	1	1	157	17.7679	11.2534
P62890	60S ribosomal protein L30 OS=Rattus norvegicus GN=Rpl30 PE=3 SV=2 - [RL30_RAT]	0	4.33951e+06					6.91103	33.91	3	4	115	12.7757	9.62744
P50878	60S ribosomal protein L4 OS=Rattus norvegicus GN=Rpl4 PE=1 SV=3 - [RL4_RAT]	0	4.17793e+06					2.23532	2.85	1	1	421	47.227	10.9165
P19944	60S acidic ribosomal protein P1 OS=Rattus norvegicus GN=Rplp1 PE=3 SV=1 - [RLA1_RAT]	0	4.14519e+06					6.92911	14.04	1	2	114	11.4907	4.32275
P62278	40S ribosomal protein S13 OS=Rattus norvegicus GN=Rps13 PE=1 SV=2 - [RS13_RAT]	0	4.12381e+06					0	9.93	1	2	151	17.2117	10.5356
P62909	40S ribosomal protein S3 OS=Rattus norvegicus GN=Rps3 PE=1 SV=1 - [RS3_RAT]	0	4.06688e+06					11.818	20.16	5	6	243	26.6574	9.65674
P62243	40S ribosomal protein S8 OS=Rattus norvegicus GN=Rps8 PE=1 SV=2 - [RS8_RAT]	0	3.91956e+06					18.5097	25.96	4	6	208	24.1902	10.3159
Q63089	Solute carrier family 22 member 1 OS=Rattus norvegicus GN=Slc22a1 PE=1 SV=1 - [S22A1_RAT]	0	3.90981e+06					0	2.88	1	1	556	61.5006	6.11279
O88446	Solute carrier family 22 member 3 OS=Rattus norvegicus GN=Slc22a3 PE=2 SV=1 - [S22A3_RAT]	0	3.90513e+06					0	4.17	1	1	551	61.01	8.14795
Q9WVR3	Phosphatidylinositol 3,4,5-trisphosphate 5-phosphatase 2 OS=Rattus norvegicus GN=Inppl1 PE=1 SV=1 - [SHIP2_RAT]	0	3.88841e+06					0	0.64	1	1	1257	139.056	6.48096
P60881	Synaptosomal-associated protein 25 OS=Rattus norvegicus GN=Snap25 PE=1 SV=1 - [SNP25_RAT]	0	3.84769e+06					6.64856	18.45	3	3	206	23.3002	4.76709
P70564	Serpin B5 OS=Rattus norvegicus GN=Serpinb5 PE=2 SV=1 - [SPB5_RAT]	0	3.75117e+06					4.07024	5.07	2	3	375	42.0367	6.1001
P61265	Syntaxin-1B OS=Rattus norvegicus GN=Stx1b PE=1 SV=1 - [STX1B_RAT]	0	3.64015e+06					3.61812	4.86	1	1	288	33.2238	5.37646
Q5XHY5	Threonine--tRNA ligase, cytoplasmic OS=Rattus norvegicus GN=Tars PE=2 SV=1 - [SYTC_RAT]	0	3.63658e+06					2.78848	1.73	1	1	695	80.5245	6.94678
P50137	Transketolase OS=Rattus norvegicus GN=Tkt PE=1 SV=1 - [TKT_RAT]	0	3.60878e+06					3.96847	2.73	2	2	623	67.6006	7.48877
P58775	Tropomyosin beta chain OS=Rattus norvegicus GN=Tpm2 PE=3 SV=1 - [TPM2_RAT]	0	3.60637e+06					0	3.17	1	1	284	32.8166	4.70361
P61078	Ubiquitin-conjugating enzyme E2 D3 OS=Rattus norvegicus GN=Ube2d3 PE=2 SV=1 - [UB2D3_RAT]	0	3.59642e+06					0	7.48	1	1	147	16.6764	7.79639
Q7M767	Ubiquitin-conjugating enzyme E2 variant 2 OS=Rattus norvegicus GN=Ube2v2 PE=1 SV=3 - [UB2V2_RAT]	0	3.56086e+06					2.653	6.9	1	1	145	16.3422	8.08936
Q00981	Ubiquitin carboxyl-terminal hydrolase isozyme L1 OS=Rattus norvegicus GN=Uchl1 PE=1 SV=2 - [UCHL1_RAT]	0	3.55877e+06					2.00064	8.07	2	2	223	24.8224	5.23682
Q3MIE4	Synaptic vesicle membrane protein VAT-1 homolog OS=Rattus norvegicus GN=Vat1 PE=1 SV=1 - [VAT1_RAT]	0	3.54637e+06					3.2254	3.71	1	2	404	43.091	6.62451
P81155	Voltage-dependent anion-selective channel protein 2 OS=Rattus norvegicus GN=Vdac2 PE=1 SV=2 - [VDAC2_RAT]	0	3.40308e+06					11.3662	16.27	4	6	295	31.7256	7.48877
P85972	Vinculin OS=Rattus norvegicus GN=Vcl PE=1 SV=1 - [VINC_RAT]	0	3.36974e+06					0	2.06	1	1	1066	116.542	6.0874
M0R5M7	Transcription factor BTF3 OS=Rattus norvegicus GN=RGD1563812 PE=3 SV=1 - [M0R5M7_RAT]	0	3.36084e+06					2.25988	11.73	1	2	162	17.6732	7.50342
B0BN81	40S ribosomal protein S5 OS=Rattus norvegicus GN=Rps5 PE=2 SV=1 - [B0BN81_RAT]	0	3.32651e+06					7.34259	13.73	2	2	204	22.8921	9.71533
G3V741	Phosphate carrier protein, mitochondrial OS=Rattus norvegicus GN=Slc25a3 PE=3 SV=1 - [G3V741_RAT]	0	3.3062e+06					2.80837	3.37	1	1	356	39.5054	9.26123
F1LRJ9	Uncharacterized protein (Fragment) OS=Rattus norvegicus GN=Selenbp1 PE=4 SV=1 - [F1LRJ9_RAT]	0	3.30548e+06					17.1907	14.01	4	6	471	52.3674	6.56592
G3V7J7	Eukaryotic translation initiation factor 5A2 (Predicted) OS=Rattus norvegicus GN=Eif5a2 PE=4 SV=1 - [G3V7J7_RAT]	0	3.30444e+06					7.20315	12.42	2	3	153	16.7822	5.57959
Q1RP74	Protein LOC100911774 OS=Rattus norvegicus GN=LOC100911774 PE=2 SV=1 - [Q1RP74_RAT]	0	3.30065e+06					4.15543	6.56	1	1	244	27.2303	4.99561
D3ZN69	Serine/threonine-protein phosphatase OS=Rattus norvegicus GN=Ppef2 PE=3 SV=1 - [D3ZN69_RAT]	0	3.29291e+06					0	1.33	1	1	754	86.4914	7.07861
D4ABK7	Heterogeneous nuclear ribonucleoprotein H3 (2H9) (Predicted), isoform CRA_c OS=Rattus norvegicus GN=Hnrnph3 PE=4 SV=1 - [D4ABK7_RAT]	0	3.28956e+06					3.38836	4.91	1	1	346	36.8461	6.87354
F1LPQ8	SECIS binding protein 2, isoform CRA_a OS=Rattus norvegicus GN=Secisbp2 PE=4 SV=2 - [F1LPQ8_RAT]	0	3.28876e+06					0	0.83	1	1	846	93.2257	8.27979
D4ACB8	Chaperonin subunit 8 (Theta) (Predicted), isoform CRA_a OS=Rattus norvegicus GN=Cct8 PE=3 SV=1 - [D4ACB8_RAT]	0	3.27529e+06					1.74258	2.55	1	1	548	59.5505	5.5415
D3ZJ50	Plakophilin 3 (Predicted), isoform CRA_a OS=Rattus norvegicus GN=Pkp3 PE=4 SV=1 - [D3ZJ50_RAT]	0	3.26162e+06					8.68177	4.01	3	3	822	89.8421	9.51025
Q7TP86	Ab1-331 OS=Rattus norvegicus GN=LOC502176 PE=2 SV=1 - [Q7TP86_RAT]	0	3.24837e+06					2.39645	5.96	1	1	151	16.8657	9.48096
B5DEY0	Pls1 protein OS=Rattus norvegicus GN=Pls1 PE=2 SV=1 - [B5DEY0_RAT]	0	3.22835e+06					2.97483	2.59	1	1	463	51.618	6.46826
D3ZT84	Alcohol dehydrogenase 6A (Class V) (Predicted) OS=Rattus norvegicus GN=Adh6a PE=3 SV=2 - [D3ZT84_RAT]	0	3.17848e+06					2.73169	4.18	1	1	335	35.68	7.10791
Q5PPJ3	Claudin OS=Rattus norvegicus GN=Cldn9 PE=2 SV=1 - [Q5PPJ3_RAT]	0	3.06075e+06					5.81742	7.37	1	2	217	22.8821	7.06396
D3ZLL8	Protein LOC100909878 OS=Rattus norvegicus GN=Rps15al4 PE=3 SV=1 - [D3ZLL8_RAT]	0	2.99368e+06					2.58045	6.92	1	1	130	14.8449	10.1255
Q0ZFS8	Protein Srsf3 OS=Rattus norvegicus GN=LOC100910660 PE=2 SV=1 - [Q0ZFS8_RAT]	0	2.95756e+06					1.85592	5.49	1	1	164	19.3179	11.6489
D4A9I5	Interleukin 1 family, member 10 (Predicted) OS=Rattus norvegicus GN=Il1f10 PE=3 SV=1 - [D4A9I5_RAT]	0	2.84483e+06					1.92818	3.95	1	1	152	17.0704	5.13525
Q5XIT8	Claudin OS=Rattus norvegicus GN=Cldn4 PE=2 SV=1 - [Q5XIT8_RAT]	0	2.79477e+06					2.97674	5.71	1	1	210	22.4174	8.47021
Q2I6B2	V-type proton ATPase subunit a OS=Rattus norvegicus GN=Atp6v0a1 PE=2 SV=1 - [Q2I6B2_RAT]	0	2.77964e+06					2.84904	1.2	1	1	832	95.5228	6.7417
G3V988	Keratin, type I cytoskeletal 39 OS=Rattus norvegicus GN=Krt39 PE=3 SV=1 - [G3V988_RAT]	0	2.7789e+06					7.7231	4.57	3	3	481	54.2888	5.35107
D3ZKH4	Histone-lysine N-methyltransferase OS=Rattus norvegicus GN=Ash1l PE=4 SV=2 - [D3ZKH4_RAT]	0	2.75376e+06					0	0.51	1	1	2918	326.268	9.30518
D4ABW9	Protein Trim29 OS=Rattus norvegicus GN=Trim29 PE=4 SV=1 - [D4ABW9_RAT]	0	2.7176e+06					3.79858	2.9	2	2	587	65.7315	7.13721
M0RC73	Protein Naa16 OS=Rattus norvegicus GN=Naa16 PE=4 SV=1 - [M0RC73_RAT]	0	2.67259e+06					0	2.08	1	1	864	101.285	8.17725
Q4V8E7	Protein Tex21 OS=Rattus norvegicus GN=Tex21 PE=2 SV=1 - [Q4V8E7_RAT]	0	2.63755e+06					2.03627	3.44	1	1	524	60.3027	7.81104
Q6P3V8	Eukaryotic translation initiation factor 4A1 OS=Rattus norvegicus GN=Eif4a1 PE=2 SV=1 - [Q6P3V8_RAT]	0	2.63347e+06					10.6556	9.85	3	4	406	46.1246	5.47803
D3ZFG5	Protein Pmp2 OS=Rattus norvegicus GN=Pmp2 PE=3 SV=1 - [D3ZFG5_RAT]	0	2.62877e+06					6.57875	9.85	1	2	132	14.9429	9.5835
Q7TP89	Peptidyl-prolyl cis-trans isomerase OS=Rattus norvegicus GN=Ppie PE=2 SV=1 - [Q7TP89_RAT]	0	2.62706e+06					2.25178	3.53	1	1	255	28.4381	5.69385
D3ZIP8	Protein Endod1 OS=Rattus norvegicus GN=Endod1 PE=4 SV=1 - [D3ZIP8_RAT]	0	2.59195e+06					0	1.6	1	1	500	54.6834	6.45557
D3ZVL4	Protein RGD1564308 OS=Rattus norvegicus GN=RGD1564308 PE=4 SV=2 - [D3ZVL4_RAT]	0	2.58753e+06					1.71011	4.11	1	1	316	35.388	9.71533
D3ZHS5	Protein Cpa4 OS=Rattus norvegicus GN=Cpa4 PE=4 SV=1 - [D3ZHS5_RAT]	0	2.55211e+06					1.67988	1.9	1	1	421	47.3557	6.60986
M0R476	Leucine-rich repeat-containing protein 15 OS=Rattus norvegicus GN=Lrrc15 PE=4 SV=1 - [M0R476_RAT]	0	2.55067e+06					2.44338	1.21	1	2	578	64.0867	6.3667
Q99PV2	Protein Stxbp3 OS=Rattus norvegicus GN=Stxbp3 PE=2 SV=1 - [Q99PV2_RAT]	0	2.54096e+06					2.64914	3.2	1	1	593	67.9769	8.01611
Q9QX80	CArG-binding factor A OS=Rattus norvegicus GN=Hnrnpab PE=2 SV=1 - [Q9QX80_RAT]	0	2.53969e+06					3.08744	4.91	1	1	285	30.8343	7.91357
G3V7W5	Cadherin 20 OS=Rattus norvegicus GN=Cdh20 PE=4 SV=1 - [G3V7W5_RAT]	0	2.53399e+06					0	1.87	1	1	801	88.8577	4.71631
G3V7S0	Folate hydrolase OS=Rattus norvegicus GN=Folh1 PE=4 SV=1 - [G3V7S0_RAT]	0	2.52926e+06					1.74324	2.26	1	1	752	84.5729	7.66455
F1LN88	Aldehyde dehydrogenase, mitochondrial OS=Rattus norvegicus GN=Aldh2 PE=3 SV=2 - [F1LN88_RAT]	0	2.52641e+06					3.72871	2.7	1	1	519	56.4807	7.32764
D3ZPV8	Protein Ggct OS=Rattus norvegicus GN=Ggct PE=4 SV=1 - [D3ZPV8_RAT]	0	2.52049e+06					2.22786	5.85	1	1	188	21.2175	5.43994
G3V9G4	ATP citrate lyase, isoform CRA_b OS=Rattus norvegicus GN=Acly PE=4 SV=1 - [G3V9G4_RAT]	0	2.51242e+06					2.97002	1.47	1	1	1091	119.637	7.44482
D4A4Q3	Protein yippee-like OS=Rattus norvegicus GN=Ypel5 PE=3 SV=1 - [D4A4Q3_RAT]	0	2.51236e+06					2.11889	9.92	1	1	121	13.8328	7.31299
D3ZYG4	Protein LOC680370 OS=Rattus norvegicus GN=LOC680370 PE=4 SV=1 - [D3ZYG4_RAT]	0	2.51029e+06					2.69242	11.9	1	1	210	23.7737	10.1841
A1EC97	Dual specificity phosphatase 14 OS=Rattus norvegicus GN=Dusp14 PE=2 SV=1 - [A1EC97_RAT]	0	2.48801e+06					8.53438	17.68	2	3	198	22.2526	9.53955
D3ZTF6	Phosphatidylinositol 3-kinase, C2 domain containing, alpha polypeptide (Predicted), isoform CRA_a OS=Rattus norvegicus GN=Pik3c2a PE=4 SV=1 - [D3ZTF6_RAT]	0	2.48801e+06					2.22035	0.77	1	1	1687	190.793	8.01611
F1M5Z5	Anoctamin OS=Rattus norvegicus GN=Ano6 PE=3 SV=2 - [F1M5Z5_RAT]	0	2.45628e+06					0	1.13	1	1	799	92.1668	6.68311
Q6IN37	GM2 ganglioside activator OS=Rattus norvegicus GN=Gm2a PE=2 SV=1 - [Q6IN37_RAT]	0	2.43802e+06					1.62852	3.52	1	1	199	21.4792	6.52197
B0BMZ1	Protein RGD1305587 OS=Rattus norvegicus GN=RGD1305587 PE=2 SV=1 - [B0BMZ1_RAT]	0	2.42977e+06					1.9597	10.83	1	1	120	13.1769	11.4146
G3V7U4	Lamin-B1 OS=Rattus norvegicus GN=Lmnb1 PE=3 SV=1 - [G3V7U4_RAT]	0	2.4216e+06					4.37242	1.87	1	2	587	66.6457	5.16064
Q6S3A1	Plectin 4 OS=Rattus norvegicus PE=2 SV=1 - [Q6S3A1_RAT]	0	2.4113e+06					7.34764	1.39	5	5	4451	506.371	5.68115
Q6P136	Hyou1 protein OS=Rattus norvegicus GN=Hyou1 PE=2 SV=1 - [Q6P136_RAT]	0	2.40683e+06					0	0.9	1	1	998	111.151	5.18604
G3V6P7	Myosin, heavy polypeptide 9, non-muscle OS=Rattus norvegicus GN=LOC100911597 PE=4 SV=1 - [G3V6P7_RAT]	0	2.36704e+06					2.77177	0.82	1	1	1960	226.273	5.65576
B5DFG5	Protein Sept6 OS=Rattus norvegicus GN=Sept6 PE=2 SV=1 - [B5DFG5_RAT]	0	2.35412e+06					1.73423	2.11	1	1	427	48.7478	6.66846
D3ZPR0	Chromosome segregation 1-like (S. cerevisiae) (Predicted) OS=Rattus norvegicus GN=Cse1l PE=4 SV=1 - [D3ZPR0_RAT]	0	2.33219e+06					5.70705	0.82	1	3	971	110.144	5.77002
G3V6S2	Aconitate hydratase OS=Rattus norvegicus GN=Aco1 PE=3 SV=1 - [G3V6S2_RAT]	0	2.32442e+06					0	0.79	1	1	889	98.1304	7.38623
Q6P6G9	Hnrpa1 protein OS=Rattus norvegicus GN=Hnrnpa1 PE=2 SV=1 - [Q6P6G9_RAT]	0	2.26577e+06					6.01345	9.9	2	2	313	33.599	9.23193
Q4V8I6	Ribosomal protein L11 OS=Rattus norvegicus GN=Rpl11 PE=2 SV=1 - [Q4V8I6_RAT]	0	2.16119e+06					1.90324	5.39	1	1	167	19.0121	9.80322
Q4G031	Dhx57 protein (Fragment) OS=Rattus norvegicus GN=Dhx57 PE=2 SV=1 - [Q4G031_RAT]	0	2.15531e+06					1.66607	2.63	1	1	342	38.0599	8.76318
Q6P7A4	Prosaposin OS=Rattus norvegicus GN=Psap PE=2 SV=1 - [Q6P7A4_RAT]	0	2.14466e+06					6.22218	1.99	1	3	553	60.9995	5.24951
B6DYQ3	Glutathione S-transferase mu 3 OS=Rattus norvegicus GN=Gstm4 PE=2 SV=1 - [B6DYQ3_RAT]	0	2.13237e+06					0	4.17	1	1	216	25.2338	5.93506
D3ZK18	Uncharacterized protein (Fragment) OS=Rattus norvegicus PE=4 SV=2 - [D3ZK18_RAT]	0	2.03047e+06					4.61388	6.45	1	2	186	20.8333	9.51025
C9WPN2	DEAD (Asp-Glu-Ala-Asp) box polypeptide 3 Y-linked OS=Rattus norvegicus GN=Ddx3 PE=2 SV=1 - [C9WPN2_RAT]	0	2.01562e+06					6.3233	5.21	3	3	652	72.9609	7.10791
D3ZYW2	Heterogeneous nuclear ribonucleoprotein H OS=Rattus norvegicus GN=Hnrnph1 PE=4 SV=1 - [D3ZYW2_RAT]	0	2.00411e+06					24.8536	7.93	2	6	429	47.0454	6.34131
F1M956	Diacylglycerol kinase OS=Rattus norvegicus GN=Dgka PE=3 SV=2 - [F1M956_RAT]	0	1.97538e+06					0	1.1	1	1	726	81.5638	6.37939
F1LVD0	Uncharacterized protein (Fragment) OS=Rattus norvegicus GN=LOC690134 PE=3 SV=2 - [F1LVD0_RAT]	0	1.96603e+06					3.8023	7.75	1	2	142	16.3607	10.5649
F1LN75	Septin-9 (Fragment) OS=Rattus norvegicus GN=Sept9 PE=1 SV=2 - [F1LN75_RAT]	0	1.93946e+06					0	1.57	1	1	574	64.165	8.11865
F1M0U5	Protein Nbas OS=Rattus norvegicus GN=Nbas PE=4 SV=2 - [F1M0U5_RAT]	0	1.9382e+06					0	0.47	1	1	2357	265.634	5.85889
F1M2I5	Uncharacterized protein OS=Rattus norvegicus GN=Opcml PE=4 SV=2 - [F1M2I5_RAT]	0	1.9361e+06					3.50663	4.35	1	2	207	22.5393	5.64307
H7C5Y5	60S ribosomal protein L6 OS=Rattus norvegicus GN=Rpl6 PE=3 SV=1 - [H7C5Y5_RAT]	0	1.89764e+06					1.93703	2.69	1	1	297	33.6309	10.6968
M0RC45	Protein LOC683536 OS=Rattus norvegicus GN=LOC683536 PE=4 SV=1 - [M0RC45_RAT]	0	1.87291e+06					1.71606	7.28	1	1	151	16.9398	6.771
M0R9D5	Protein Ahnak OS=Rattus norvegicus GN=Ahnak PE=1 SV=1 - [M0R9D5_RAT]	0	1.82062e+06					1.75354	2.85	1	2	5363	571.304	6.22705
M0RCJ9	Protein LOC100911027 OS=Rattus norvegicus GN=LOC100911027 PE=4 SV=1 - [M0RCJ9_RAT]	0	1.81402e+06					1.98124	7.05	1	1	156	16.7937	4.80518
D3Z7Z9	Uncharacterized protein (Fragment) OS=Rattus norvegicus PE=4 SV=2 - [D3Z7Z9_RAT]	0	1.80393e+06					2.01057	10.26	1	2	156	17.9014	9.75928
M0R9D9	Uncharacterized protein (Fragment) OS=Rattus norvegicus PE=4 SV=1 - [M0R9D9_RAT]	0	1.79311e+06					0	7.66	1	1	209	22.9773	7.75244
D4A3S5	Protein Herc1 (Fragment) OS=Rattus norvegicus GN=Herc1 PE=4 SV=2 - [D4A3S5_RAT]	0	1.78663e+06					1.79137	0.34	1	1	3276	358.502	6.29053
F7FLF2	Protein LOC100360057 (Fragment) OS=Rattus norvegicus GN=LOC100363800 PE=4 SV=1 - [F7FLF2_RAT]	0	1.761e+06					7.37204	18.9	2	3	127	14.6487	9.18799
F1LYD4	Protein Ca10 OS=Rattus norvegicus GN=Car10 PE=4 SV=2 - [F1LYD4_RAT]	0	1.69187e+06					0	1.68	1	1	297	34.0471	8.08936
M0R6L4	40S ribosomal protein S3a OS=Rattus norvegicus GN=LOC100365839 PE=3 SV=1 - [M0R6L4_RAT]	0	1.68536e+06					3.552	3.03	1	2	264	29.8887	9.72998
M0R686	Protein Irgq OS=Rattus norvegicus GN=Irgq PE=4 SV=1 - [M0R686_RAT]	0	1.6566e+06					2.09896	1.89	1	1	582	59.0677	4.75439
Q63422	Proton-dependent peptide transporter (Fragment) OS=Rattus norvegicus GN=Slc15a1 PE=2 SV=1 - [Q63422_RAT]	0	1.63661e+06					0	8.39	1	1	453	49.8728	8.52881
D3ZXL0	Protein Slc26a10 OS=Rattus norvegicus GN=Slc26a10 PE=4 SV=2 - [D3ZXL0_RAT]	0	1.61273e+06					4.09186	1.17	1	2	684	73.8763	7.97217
F1M7M0	FYVE, RhoGEF and PH domain-containing protein 4 OS=Rattus norvegicus GN=Fgd4 PE=4 SV=2 - [F1M7M0_RAT]	0	1.57628e+06					0	1.96	1	1	766	86.3122	5.92236
M0R995	Uncharacterized protein (Fragment) OS=Rattus norvegicus PE=4 SV=1 - [M0R995_RAT]	0	1.5304e+06					6.61821	5.39	1	2	241	27.2091	10.2866
F1LP05	ATP synthase subunit alpha OS=Rattus norvegicus GN=Atp5a1 PE=3 SV=1 - [F1LP05_RAT]	0	1.42138e+06					4.14687	4.16	2	2	553	59.7757	9.26123
Q498R0	TAF6 RNA polymerase II, TATA box binding protein (TBP)-associated factor OS=Rattus norvegicus GN=Taf6 PE=2 SV=1 - [Q498R0_RAT]	0	1.42063e+06					0	1.85	1	1	647	71.1564	8.35303
M0RBW0	Protein Flg2 OS=Rattus norvegicus GN=Flg2 PE=4 SV=1 - [M0RBW0_RAT]	0	1.3984e+06					9.42765	6.56	1	3	259	29.9946	7.03467
D4A365	Protein Zbtb40 OS=Rattus norvegicus GN=Zbtb40 PE=4 SV=2 - [D4A365_RAT]	0	1.39044e+06					0	1.35	1	1	1255	138.157	6.40479
D3ZZJ4	Protein Ttc21a OS=Rattus norvegicus GN=Ttc21a PE=4 SV=2 - [D3ZZJ4_RAT]	0	1.33348e+06					0	0.61	1	1	1314	148.618	6.78564
D3Z822	Protein Atr OS=Rattus norvegicus GN=Atr PE=4 SV=2 - [D3Z822_RAT]	0	1.3234e+06					0	0.72	1	1	2642	300.966	7.56201
D3ZHB3	40S ribosomal protein S12 OS=Rattus norvegicus GN=LOC100360573 PE=3 SV=2 - [D3ZHB3_RAT]	0	1.32064e+06					2.3824	18.32	2	2	131	14.3764	7.21045
D3ZJZ8	Protein Capn12 OS=Rattus norvegicus GN=Capn12 PE=4 SV=1 - [D3ZJZ8_RAT]	0	1.29572e+06					2.28323	1.39	1	1	719	80.3262	6.31592
Q0HA14	Rae-like protein (Fragment) OS=Rattus norvegicus GN=Raet1e PE=2 SV=1 - [Q0HA14_RAT]	0	1.26617e+06					2.93779	6.44	1	1	202	21.9779	6.84424
Q6LDG5	Hypoxanthine-guanine phosporibosyltransferase (Fragment) OS=Rattus norvegicus GN=Hprt1 PE=2 SV=1 - [Q6LDG5_RAT]	0	1.2544e+06					2.03228	8.13	1	1	160	17.8724	8.74854
O70371	Annexin (Fragment) OS=Rattus norvegicus PE=2 SV=1 - [O70371_RAT]	0	1.22824e+06					3.58883	6.95	2	2	302	33.9444	5.10986
F1LQW3	Protein Sfpq (Fragment) OS=Rattus norvegicus GN=Sfpq PE=4 SV=1 - [F1LQW3_RAT]	0	1.22541e+06					1.7416	4.62	2	2	606	65.6544	8.80713
M0R662	Uncharacterized protein (Fragment) OS=Rattus norvegicus PE=4 SV=1 - [M0R662_RAT]	0	1.21552e+06					2.19321	7.63	1	1	131	14.8552	9.89111
F1M2K3	Small ubiquitin-related modifier (Fragment) OS=Rattus norvegicus PE=3 SV=1 - [F1M2K3_RAT]	0	1.20221e+06					2.1506	12.77	1	1	94	10.7484	6.55127
M0R9Q9	Cytosol aminopeptidase (Fragment) OS=Rattus norvegicus GN=Lap3 PE=3 SV=1 - [M0R9Q9_RAT]	0	1.1382e+06					14.605	10.06	4	8	487	52.5947	6.48096
F1LQQ1	Malic enzyme (Fragment) OS=Rattus norvegicus GN=Me1 PE=3 SV=2 - [F1LQQ1_RAT]	0	1.13607e+06					3.70145	3.28	1	1	549	61.0735	5.92236
D3ZBB8	Cytoplasmic dynein 2 heavy chain 1 OS=Rattus norvegicus GN=Dync2h1 PE=4 SV=2 - [D3ZBB8_RAT]	0	1.12597e+06					0	0.35	2	2	4303	491.022	6.72705
Q5PPJ7	Psmd1 protein (Fragment) OS=Rattus norvegicus GN=Psmd1 PE=2 SV=1 - [Q5PPJ7_RAT]	0	1.10762e+06					2.80626	1.42	1	1	846	93.2626	6.39209
F1M7V4	Protein piccolo (Fragment) OS=Rattus norvegicus GN=Pclo PE=4 SV=2 - [F1M7V4_RAT]	0	1.09839e+06					1.85831	0.23	1	1	3885	426.078	5.52881
G3V7Q6	Proteasome subunit beta type OS=Rattus norvegicus GN=Psmb5 PE=3 SV=1 - [G3V7Q6_RAT]	0	1.09617e+06					1.73568	3.04	1	1	263	28.5412	7.02002
D4ADH2	Protein Pcbp1 (Fragment) OS=Rattus norvegicus GN=Pcbp1 PE=4 SV=2 - [D4ADH2_RAT]	0	1.0839e+06					3.15211	4.12	1	1	267	27.9363	8.19189
D3ZAV9	Uncharacterized protein OS=Rattus norvegicus PE=3 SV=1 - [D3ZAV9_RAT]	0	1.07956e+06					1.89307	4.23	1	1	213	24.0439	9.96436
M0R4I9	Uncharacterized protein (Fragment) OS=Rattus norvegicus PE=4 SV=1 - [M0R4I9_RAT]	0	1.07822e+06					3.42188	7.49	1	1	187	21.2206	6.62451
B2GV69	Hnrnpa2b1 protein (Fragment) OS=Rattus norvegicus GN=Hnrnpa2b1 PE=2 SV=1 - [B2GV69_RAT]	0	1.02647e+06					7.11328	8.43	1	3	178	18.3735	9.42236
D3ZRJ7	Protein Lrrk1 OS=Rattus norvegicus GN=Lrrk1 PE=4 SV=2 - [D3ZRJ7_RAT]	0	963169					0	0.3	1	1	2013	225.303	6.50732
F1M9D3	Protein S1pr3 OS=Rattus norvegicus GN=S1pr3 PE=3 SV=1 - [F1M9D3_RAT]	0	962935					0	4.49	1	1	379	42.2663	9.53955
M0R4D7	Protein LOC100910820 OS=Rattus norvegicus GN=LOC100910820 PE=3 SV=1 - [M0R4D7_RAT]	0	961011					12.8055	5.38	2	4	483	51.6642	8.88037
M0RD35	Uncharacterized protein OS=Rattus norvegicus PE=3 SV=1 - [M0RD35_RAT]	0	894365					2.001	5.59	1	1	161	17.4873	9.26123
D3ZAK7	Protein Ibtk OS=Rattus norvegicus GN=Ibtk PE=4 SV=2 - [D3ZAK7_RAT]	0	878545					2.62254	0.89	1	1	1344	150.029	7.78174
Q8CGL8	Secretogranin II variant (Fragment) OS=Rattus norvegicus GN=Scg2 PE=2 SV=1 - [Q8CGL8_RAT]	0	875038					1.97967	2.17	1	1	322	37.1012	4.57666
D3ZZR8	Protein Krtap3-1 OS=Rattus norvegicus GN=Krtap3-1 PE=4 SV=1 - [D3ZZR8_RAT]	0	834114					2.90533	17.35	1	1	98	10.2904	5.07178
D3Z8D7	Protein LOC100361854 OS=Rattus norvegicus GN=LOC100361854 PE=4 SV=1 - [D3Z8D7_RAT]	0	798078					2.0805	7.83	1	1	115	12.9981	11.0044
D3ZEF5	Protein LOC301861 OS=Rattus norvegicus GN=LOC301861 PE=3 SV=1 - [D3ZEF5_RAT]	0	794198					1.92695	3.08	1	1	389	43.7793	6.16357
F1LY69	Protein Ift140 OS=Rattus norvegicus GN=Ift140 PE=4 SV=2 - [F1LY69_RAT]	0	748072					0	1.16	1	1	1463	165.774	6.03662
M0R5K9	Protein LOC100912024 (Fragment) OS=Rattus norvegicus GN=LOC100912024 PE=3 SV=1 - [M0R5K9_RAT]	0	680688					15.6414	32.45	5	7	151	17.6438	11.1069
F1LSW7	60S ribosomal protein L14 OS=Rattus norvegicus GN=Rpl14 PE=4 SV=1 - [F1LSW7_RAT]	0	622679					2.66694	5.61	1	1	214	23.31	11.1069
B0K023	Rpl7 protein (Fragment) OS=Rattus norvegicus GN=Rpl7 PE=2 SV=1 - [B0K023_RAT]	0	524855					4.54462	13	3	3	223	26.1685	10.8579
F1M3B3	Protein Phip (Fragment) OS=Rattus norvegicus GN=Phip PE=4 SV=2 - [F1M3B3_RAT]	0	502974					0	2.05	1	1	1758	199.254	8.80713
M0R6E5	Protein LOC682408 (Fragment) OS=Rattus norvegicus GN=LOC682408 PE=4 SV=1 - [M0R6E5_RAT]	0	489734					2.8179	2.4	1	1	499	48.902	8.71924
Q4KM60	Ribosomal protein (Fragment) OS=Rattus norvegicus GN=Rpl10a PE=2 SV=1 - [Q4KM60_RAT]	0	441855					2.61571	6.31	1	1	206	23.5209	10.0669
F1M0K6	Protein RGD1565566 (Fragment) OS=Rattus norvegicus GN=RGD1565566 PE=3 SV=1 - [F1M0K6_RAT]	0	440114					2.95099	7.95	1	1	176	20.6358	10.4624
D3ZWB4	Protein Spata13 OS=Rattus norvegicus GN=Spata13 PE=4 SV=2 - [D3ZWB4_RAT]	0	341902					1.88633	0.64	1	1	1247	137.929	7.75244
D3ZIP1	Protein Kcnrg OS=Rattus norvegicus GN=Kcnrg PE=4 SV=1 - [D3ZIP1_RAT]	0	0					1.78989	3.36	1	1	268	30.0095	8.29443
F1M8J2	Polyamine-modulated factor 1-binding protein 1 OS=Rattus norvegicus GN=Pmfbp1 PE=4 SV=2 - [F1M8J2_RAT]	0	0					0	0.62	1	1	971	113.493	6.25244
Q5EB87	Zer1 protein (Fragment) OS=Rattus norvegicus GN=Zer1 PE=2 SV=1 - [Q5EB87_RAT]	0	0					1.86434	23.08	1	1	52	6.12208	8.00146
D3ZTK5	60S ribosomal protein L27 OS=Rattus norvegicus GN=RGD1563835 PE=3 SV=1 - [D3ZTK5_RAT]	0	0					2.05983	6.67	1	1	135	15.6325	10.2866
D4ABS2	Dynamin-1-like protein (Fragment) OS=Rattus norvegicus GN=Dnm1l PE=3 SV=2 - [D4ABS2_RAT]	0	0					2.04798	1.31	1	1	685	76.7304	7.88428
Q0QEP3	ATP synthase subunit beta (Fragment) OS=Rattus norvegicus GN=Atp5b PE=2 SV=1 - [Q0QEP3_RAT]	0	0					12.9638	13.41	3	4	343	37.2282	5.10986
D3ZV50	Protein LOC100364509 OS=Rattus norvegicus GN=LOC100364509 PE=4 SV=1 - [D3ZV50_RAT]	0	0					6.28728	8.25	2	3	194	22.6335	10.3159
M0RBP6	Uncharacterized protein OS=Rattus norvegicus PE=3 SV=1 - [M0RBP6_RAT]	0	0					2.46069	3.52	1	1	596	66.0415	5.90967
M0R626	Uncharacterized protein (Fragment) OS=Rattus norvegicus PE=4 SV=1 - [M0R626_RAT]	0	0					2.06882	6.49	1	1	154	17.6488	8.30908
Q9JJ49	Titin (Fragment) OS=Rattus norvegicus PE=2 SV=1 - [Q9JJ49_RAT]	0	0					2.86109	8.96	1	1	201	22.3044	5.33838
T1SRT4	Radixin isoform OS=Rattus norvegicus GN=Rdx PE=2 SV=1 - [T1SRT4_RAT]	0	0					2.35385	2.37	1	1	379	45.2547	8.95361
A0A0A0MY51	Dynamin-1 OS=Rattus norvegicus GN=Dnm1 PE=4 SV=1 - [A0A0A0MY51_RAT]	0	0					3.92477	2.09	2	2	814	92.4274	6.93213
A0A096MJ40	Protein Hmcn1 (Fragment) OS=Rattus norvegicus GN=Hmcn1 PE=1 SV=1 - [A0A096MJ40_RAT]	0	0					0	0.36	1	1	4703	509.199	6.59521
X1WI37	Protein LOC100362640 (Fragment) OS=Rattus norvegicus GN=LOC100362640 PE=3 SV=1 - [X1WI37_RAT]	0	0					9.7908	15.27	4	4	262	29.448	10.1548
