# Supplementary material for: Mysterious inhibitory cell regulator investigated and found likely to be secretogranin II related
Source: PeerJ. 2017 Oct 13;5:e3833. doi: 10.7717/peerj.3833 (PMC5642266; doi:10.7717/peerj.3833)
Supplement: Supplemental Information 18 — Control total hits 438. [file peerj-05-3833-s018.xlsx]

## Sheet: Sheet1
Accession	Description	Score	Coverage	# Proteins	# Unique Peptides	# Peptides	# PSMs	Area	# AAs	MW [kDa]	calc. pI
Q4FZU2	Keratin, type II cytoskeletal 6A OS=Rattus norvegicus GN=Krt6a PE=1 SV=1 - [K2C6A_RAT]	317.64	19.38	3	2	14	109	3.13735e+09	552	59.2127	7.94287
Q6P6Q2	Keratin, type II cytoskeletal 5 OS=Rattus norvegicus GN=Krt5 PE=1 SV=1 - [K2C5_RAT]	252.896	32.29	4	11	24	96	1.89544e+09	576	61.7877	7.79639
F1M0B2	Uncharacterized protein (Fragment) OS=Rattus norvegicus GN=LOC683295 PE=4 SV=2 - [F1M0B2_RAT]	251.153	10.65	2	1	6	85	3.13735e+09	535	57.715	7.88428
P68370	Tubulin alpha-1A chain OS=Rattus norvegicus GN=Tuba1a PE=1 SV=1 - [TBA1A_RAT]	240.468	47.89	3	6	16	74	2.7337e+08	451	50.1036	5.05908
Q6IG05	Keratin, type II cytoskeletal 75 OS=Rattus norvegicus GN=Krt75 PE=3 SV=2 - [K2C75_RAT]	211.111	16.79	2	1	14	78	1.89544e+09	542	58.9906	8.07471
Q6IFW6	Keratin, type I cytoskeletal 10 OS=Rattus norvegicus GN=Krt10 PE=3 SV=1 - [K1C10_RAT]	209.174	21.86	8	11	15	88	2.73303e+09	526	56.4705	5.14795
P69897	Tubulin beta-5 chain OS=Rattus norvegicus GN=Tubb5 PE=1 SV=1 - [TBB5_RAT]	204.366	39.86	2	3	14	72	7.83304e+07	444	49.639	4.89404
P85108	Tubulin beta-2A chain OS=Rattus norvegicus GN=Tubb2a PE=1 SV=1 - [TBB2A_RAT]	198.478	37.08	2	1	13	69	8.60338e+07	445	49.875	4.89404
Q3KRE8	Tubulin beta-2B chain OS=Rattus norvegicus GN=Tubb2b PE=1 SV=1 - [TBB2B_RAT]	196.434	37.08	2	1	13	68	8.60338e+07	445	49.9209	4.89404
Q6IMF3	Keratin, type II cytoskeletal 1 OS=Rattus norvegicus GN=Krt1 PE=2 SV=1 - [K2C1_RAT]	194.896	9.92	1	6	10	73	4.26671e+09	625	64.7911	7.86963
Q6IFV1	Keratin, type I cytoskeletal 14 OS=Rattus norvegicus GN=Krt14 PE=2 SV=1 - [K1C14_RAT]	171.143	32.58	9	4	17	60	1.95002e+09	485	52.6509	5.16064
Q4QRB4	Tubulin beta-3 chain OS=Rattus norvegicus GN=Tubb3 PE=1 SV=1 - [TBB3_RAT]	156.631	34.67	2	3	12	52	7.17617e+07	450	50.3862	4.93213
F1LMV6	Protein Dsp OS=Rattus norvegicus GN=Dsp PE=1 SV=1 - [F1LMV6_RAT]	146.162	13.9	2	34	34	51	1.80221e+07	2877	332.187	6.82959
Q6IFU8	Keratin, type I cytoskeletal 17 OS=Rattus norvegicus GN=Krt17 PE=2 SV=1 - [K1C17_RAT]	144.69	36.95	8	5	20	56	3.73202e+09	433	48.0931	5.021
P07335	Creatine kinase B-type OS=Rattus norvegicus GN=Ckb PE=1 SV=2 - [KCRB_RAT]	143.707	32.81	1	10	10	38	3.72682e+07	381	42.6983	5.66846
Q5XIF6	Tubulin alpha-4A chain OS=Rattus norvegicus GN=Tuba4a PE=2 SV=1 - [TBA4A_RAT]	142.742	46.21	2	5	15	50	1.24833e+08	448	49.8924	5.05908
B4F7C2	Protein Tubb4a OS=Rattus norvegicus GN=Tubb4a PE=2 SV=1 - [B4F7C2_RAT]	138.988	30.41	2	1	11	52	7.01221e+07	444	49.5539	4.88135
V9GZ85	Actin, cytoplasmic 2 (Fragment) OS=Rattus norvegicus GN=LOC100361457 PE=3 SV=1 - [V9GZ85_RAT]	137.53	55.35	13	8	16	52	5.51353e+08	374	41.5927	5.70654
Q6IFU7	Keratin, type I cytoskeletal 42 OS=Rattus norvegicus GN=Krt42 PE=3 SV=1 - [K1C42_RAT]	132.041	22.35	7	4	14	45	1.61166e+09	452	50.1819	5.16064
Q6IG01	Keratin, type II cytoskeletal 1b OS=Rattus norvegicus GN=Krt77 PE=3 SV=1 - [K2C1B_RAT]	124.204	13.29	2	3	9	47	2.77726e+09	519	57.2196	5.64307
P47942	Dihydropyrimidinase-related protein 2 OS=Rattus norvegicus GN=Dpysl2 PE=1 SV=1 - [DPYL2_RAT]	123.355	44.58	1	15	17	41	4.01046e+07	572	62.2386	6.37939
Q6P0K8	Junction plakoglobin OS=Rattus norvegicus GN=Jup PE=1 SV=1 - [PLAK_RAT]	103.877	38.12	3	21	21	36	2.4951e+07	745	81.7488	6.13818
P11980	Pyruvate kinase PKM OS=Rattus norvegicus GN=Pkm PE=1 SV=3 - [KPYM_RAT]	86.8096	33.33	6	6	16	31	7.39331e+07	531	57.7809	7.06396
Q6IFU9	Protein Krt16 OS=Rattus norvegicus GN=Krt16 PE=2 SV=1 - [Q6IFU9_RAT]	81.9467	18.79	5	6	10	29	6.63556e+08	463	50.7457	5.12256
Q6IFV3	Keratin, type I cytoskeletal 15 OS=Rattus norvegicus GN=Krt15 PE=1 SV=1 - [K1C15_RAT]	81.3388	14.77	11	1	10	35	3.91703e+09	447	48.8401	4.85596
M0RCB1	Protein LOC102549957 OS=Rattus norvegicus GN=LOC102549957 PE=3 SV=1 - [M0RCB1_RAT]	76.4626	25.59	10	13	15	32	2.39996e+07	641	70.386	5.59229
P09117	Fructose-bisphosphate aldolase C OS=Rattus norvegicus GN=Aldoc PE=1 SV=3 - [ALDOC_RAT]	75.9996	35.81	4	10	11	27	1.63456e+07	363	39.2592	7.12256
P63102	14-3-3 protein zeta/delta OS=Rattus norvegicus GN=Ywhaz PE=1 SV=1 - [1433Z_RAT]	75.0925	42.86	1	7	9	24	2.25979e+07	245	27.7537	4.79248
M0R4B8	Pyruvate kinase OS=Rattus norvegicus PE=3 SV=1 - [M0R4B8_RAT]	67.1723	32.44	5	2	12	22	4.59716e+07	487	52.8544	7.82568
P68035	Actin, alpha cardiac muscle 1 OS=Rattus norvegicus GN=Actc1 PE=2 SV=1 - [ACTC_RAT]	63.88	32.63	7	2	10	28	2.34533e+08	377	41.9919	5.38916
Q6IFV4	Keratin, type I cytoskeletal 13 OS=Rattus norvegicus GN=Krt13 PE=3 SV=1 - [K1C13_RAT]	63.7308	14.84	12	2	10	31	2.15353e+09	438	47.6993	4.90674
P50398	Rab GDP dissociation inhibitor alpha OS=Rattus norvegicus GN=Gdi1 PE=1 SV=1 - [GDIA_RAT]	62.6116	30.43	2	8	10	19	1.40375e+07	447	50.5042	5.13525
P05065	Fructose-bisphosphate aldolase A OS=Rattus norvegicus GN=Aldoa PE=1 SV=2 - [ALDOA_RAT]	61.2561	38.74	4	11	12	23	3.78881e+07	364	39.3273	8.08936
P42123	L-lactate dehydrogenase B chain OS=Rattus norvegicus GN=Ldhb PE=1 SV=2 - [LDHB_RAT]	54.7239	22.75	3	5	7	18	2.61761e+07	334	36.5891	6.04932
P07323	Gamma-enolase OS=Rattus norvegicus GN=Eno2 PE=1 SV=2 - [ENOG_RAT]	54.0103	22.12	1	6	7	15	3.58122e+07	434	47.1109	5.16064
P62260	14-3-3 protein epsilon OS=Rattus norvegicus GN=Ywhae PE=1 SV=1 - [1433E_RAT]	50.57	36.08	1	6	8	16	2.49652e+07	255	29.1554	4.7417
Q10758	Keratin, type II cytoskeletal 8 OS=Rattus norvegicus GN=Krt8 PE=1 SV=3 - [K2C8_RAT]	50.2794	10.97	5	2	8	26	9.44781e+08	483	53.9853	5.99854
Q07936	Annexin A2 OS=Rattus norvegicus GN=Anxa2 PE=1 SV=2 - [ANXA2_RAT]	48.2956	26.25	1	8	8	15	2.43374e+07	339	38.6538	7.69385
Q6IG00	Keratin, type II cytoskeletal 4 OS=Rattus norvegicus GN=Krt4 PE=3 SV=1 - [K2C4_RAT]	48.0933	11.19	2	1	10	26	7.56507e+08	536	57.631	7.63525
P53534	Glycogen phosphorylase, brain form (Fragment) OS=Rattus norvegicus GN=Pygb PE=1 SV=3 - [PYGB_RAT]	44.9475	14.68	4	7	10	18	2.75157e+07	838	96.1131	6.68311
Q6IFZ5	Protein Krt76 OS=Rattus norvegicus GN=Krt76 PE=2 SV=1 - [Q6IFZ5_RAT]	44.9257	8.26	1	0	8	24	7.24669e+08	581	61.7205	8.38232
M0R5J4	Uncharacterized protein OS=Rattus norvegicus PE=3 SV=1 - [M0R5J4_RAT]	43.1892	24.88	8	2	8	13	3.67642e+07	434	47.0452	6.3667
P13221	Aspartate aminotransferase, cytoplasmic OS=Rattus norvegicus GN=Got1 PE=1 SV=3 - [AATC_RAT]	40.7053	22.03	2	8	8	13	4.69445e+07	413	46.3995	7.21045
P04642	L-lactate dehydrogenase A chain OS=Rattus norvegicus GN=Ldha PE=1 SV=1 - [LDHA_RAT]	39.7391	21.39	9	5	7	14	3.53748e+07	332	36.4273	8.26514
D3ZGY4	Glyceraldehyde-3-phosphate dehydrogenase OS=Rattus norvegicus GN=Gapdh-ps2 PE=3 SV=1 - [D3ZGY4_RAT]	38.4361	35.14	28	7	7	13	6.41114e+07	333	35.8001	7.76709
P48500	Triosephosphate isomerase OS=Rattus norvegicus GN=Tpi1 PE=1 SV=2 - [TPIS_RAT]	38.1364	52.61	4	9	9	13	7.41983e+06	249	26.8318	7.23975
Q6IG02	Keratin, type II cytoskeletal 2 epidermal OS=Rattus norvegicus GN=Krt2 PE=3 SV=1 - [K22E_RAT]	37.6229	10.07	2	3	9	17	7.50719e+08	685	69.0852	7.69385
P68255	14-3-3 protein theta OS=Rattus norvegicus GN=Ywhaq PE=1 SV=1 - [1433T_RAT]	36.9868	28.98	2	3	6	12	3.31761e+07	245	27.7608	4.77979
P19804	Nucleoside diphosphate kinase B OS=Rattus norvegicus GN=Nme2 PE=1 SV=1 - [NDKB_RAT]	36.7588	46.05	3	1	6	15	1.89337e+07	152	17.2719	7.44482
Q05982	Nucleoside diphosphate kinase A OS=Rattus norvegicus GN=Nme1 PE=1 SV=1 - [NDKA_RAT]	36.1985	46.05	3	1	6	15	1.89337e+07	152	17.1818	6.32861
U3R7A7	Keratin 71 OS=Rattus norvegicus GN=Krt71 PE=2 SV=1 - [U3R7A7_RAT]	34.2423	5.93	2	1	4	17	5.28374e+08	523	57.2858	6.60986
P82995	Heat shock protein HSP 90-alpha OS=Rattus norvegicus GN=Hsp90aa1 PE=1 SV=3 - [HS90A_RAT]	33.5529	14.73	10	4	10	13	3.51313e+07	733	84.7618	5.0083
P34058	Heat shock protein HSP 90-beta OS=Rattus norvegicus GN=Hsp90ab1 PE=1 SV=4 - [HS90B_RAT]	32.224	13.4	10	2	10	14	3.32087e+07	724	83.2291	5.03369
B1WBU9	Alpha-1,4 glucan phosphorylase OS=Rattus norvegicus GN=Pygm PE=2 SV=1 - [B1WBU9_RAT]	31.9702	8.67	4	4	7	12	1.15263e+07	842	97.2607	7.10791
M0RAU4	Uncharacterized protein (Fragment) OS=Rattus norvegicus PE=3 SV=1 - [M0RAU4_RAT]	31.7538	18.99	5	1	7	10	3.67642e+07	437	47.4853	6.46826
P10860	Glutamate dehydrogenase 1, mitochondrial OS=Rattus norvegicus GN=Glud1 PE=1 SV=2 - [DHE3_RAT]	31.6364	17.03	3	7	7	14	7.86973e+06	558	61.3773	8.00146
B2GV79	Pdxp protein OS=Rattus norvegicus GN=Pdxp PE=2 SV=1 - [B2GV79_RAT]	31.4972	23.97	3	5	5	10	4.38907e+06	292	31.404	5.5415
G3V712	Keratin complex 2, basic, gene 7, isoform CRA_a OS=Rattus norvegicus GN=Krt7 PE=3 SV=1 - [G3V712_RAT]	29.417	6.13	3	1	5	19	5.32157e+08	457	50.7751	5.87158
M0RBW0	Protein Flg2 OS=Rattus norvegicus GN=Flg2 PE=4 SV=1 - [M0RBW0_RAT]	28.6939	8.11	1	2	2	12	2.59196e+06	259	29.9946	7.03467
P61983	14-3-3 protein gamma OS=Rattus norvegicus GN=Ywhag PE=1 SV=2 - [1433G_RAT]	28.2827	20.24	1	2	5	10	3.5595e+07	247	28.2849	4.89404
F1M9V7	Protein Npepps OS=Rattus norvegicus GN=Npepps PE=4 SV=1 - [F1M9V7_RAT]	28.2488	11.3	3	9	9	12	6.88969e+06	920	103.279	5.77002
P46462	Transitional endoplasmic reticulum ATPase OS=Rattus norvegicus GN=Vcp PE=1 SV=3 - [TERA_RAT]	26.2583	11.54	1	8	8	10	7.04175e+06	806	89.2927	5.26221
O08651	D-3-phosphoglycerate dehydrogenase OS=Rattus norvegicus GN=Phgdh PE=1 SV=3 - [SERA_RAT]	25.3318	15.76	3	7	7	9	6.71982e+06	533	56.4572	6.7124
P68511	14-3-3 protein eta OS=Rattus norvegicus GN=Ywhah PE=1 SV=2 - [1433F_RAT]	25.1819	20.33	1	2	5	11	3.31761e+07	246	28.194	4.89404
P06761	78 kDa glucose-regulated protein OS=Rattus norvegicus GN=Hspa5 PE=1 SV=1 - [GRP78_RAT]	24.9102	10.86	1	4	6	8	5.13754e+06	654	72.3024	5.16064
P47858	ATP-dependent 6-phosphofructokinase, muscle type OS=Rattus norvegicus GN=Pfkm PE=2 SV=3 - [PFKAM_RAT]	24.0413	14.36	2	8	9	9	7.13756e+06	780	85.5057	8.00146
Q6P6V0	Glucose-6-phosphate isomerase OS=Rattus norvegicus GN=Gpi PE=1 SV=1 - [G6PI_RAT]	23.8844	11.29	1	6	6	9	1.51895e+07	558	62.7871	7.76709
Q9JKB7	Guanine deaminase OS=Rattus norvegicus GN=Gda PE=2 SV=1 - [Q9JKB7_RAT]	23.8628	18.72	2	9	9	10	1.21209e+07	454	50.8687	5.71924
P61765	Syntaxin-binding protein 1 OS=Rattus norvegicus GN=Stxbp1 PE=1 SV=1 - [STXB1_RAT]	23.7005	8.75	1	5	5	10	9.96164e+06	594	67.5259	6.96143
P17220	Proteasome subunit alpha type-2 OS=Rattus norvegicus GN=Psma2 PE=1 SV=3 - [PSA2_RAT]	23.4786	34.62	2	5	5	8	3.96149e+06	234	25.9103	7.43018
O35095	Neurochondrin OS=Rattus norvegicus GN=Ncdn PE=1 SV=2 - [NCDN_RAT]	23.2415	11.66	1	7	7	8	4.72639e+06	729	78.8727	5.61768
P08009	Glutathione S-transferase Yb-3 OS=Rattus norvegicus GN=Gstm3 PE=1 SV=2 - [GSTM4_RAT]	22.9865	24.77	8	4	4	7	3.61539e+06	218	25.664	7.32764
Q9JLJ3	4-trimethylaminobutyraldehyde dehydrogenase OS=Rattus norvegicus GN=Aldh9a1 PE=1 SV=1 - [AL9A1_RAT]	22.9333	16.4	1	7	7	9	8.73507e+06	494	53.618	6.91748
O55096	Dipeptidyl peptidase 3 OS=Rattus norvegicus GN=Dpp3 PE=1 SV=2 - [DPP3_RAT]	22.3203	4.34	1	2	2	5	1.29396e+06	738	82.9869	5.22412
F1M6F6	Protein Asap2 (Fragment) OS=Rattus norvegicus GN=Asap2 PE=4 SV=2 - [F1M6F6_RAT]	22.1589	0.87	3	1	1	10	4.49551e+09	922	102.694	6.68311
F1LMW7	Myristoylated alanine-rich C-kinase substrate OS=Rattus norvegicus GN=Marcks PE=4 SV=2 - [F1LMW7_RAT]	21.9626	17.86	2	2	2	6	2.08638e+06	308	29.8709	4.36084
Q5U300	Ubiquitin-like modifier-activating enzyme 1 OS=Rattus norvegicus GN=Uba1 PE=1 SV=1 - [UBA1_RAT]	21.7792	4.91	4	4	4	6	5.06903e+06	1058	117.713	5.56689
G3V9A3	Protein Sfn OS=Rattus norvegicus GN=Sfn PE=3 SV=1 - [G3V9A3_RAT]	21.5587	14.92	3	1	4	9	3.31761e+07	248	27.7297	4.77979
M0R757	Elongation factor 1-alpha OS=Rattus norvegicus GN=LOC100360413 PE=3 SV=1 - [M0R757_RAT]	20.9258	13.42	8	6	6	10	3.12956e+07	462	50.0761	9.01221
P35213	14-3-3 protein beta/alpha OS=Rattus norvegicus GN=Ywhab PE=1 SV=3 - [1433B_RAT]	20.6017	18.29	1	1	4	8	3.31761e+07	246	28.0368	4.88135
Q5I0G4	Glycine--tRNA ligase (Fragment) OS=Rattus norvegicus GN=Gars PE=1 SV=1 - [SYG_RAT]	20.5009	7.22	2	3	3	6	1.74104e+06	637	71.9843	6.07471
P60901	Proteasome subunit alpha type-6 OS=Rattus norvegicus GN=Psma6 PE=1 SV=1 - [PSA6_RAT]	20.1284	25.61	1	6	6	8	7.92276e+06	246	27.3818	6.75635
Q62952	Dihydropyrimidinase-related protein 3 OS=Rattus norvegicus GN=Dpysl3 PE=1 SV=2 - [DPYL3_RAT]	19.8055	12.81	1	4	5	6	4.23576e+06	570	61.928	6.49365
Q71SY3	Translin OS=Rattus norvegicus GN=Tsn PE=2 SV=1 - [Q71SY3_RAT]	18.2845	18.86	4	4	4	7	6.36234e+06	228	26.1547	6.44287
A0A096MJR9	Protein LOC100911610 (Fragment) OS=Rattus norvegicus GN=LOC100911610 PE=4 SV=1 - [A0A096MJR9_RAT]	18.167	10.69	4	3	3	6	5.68331e+06	477	52.1796	7.41553
D3ZXK9	Purine nucleoside phosphorylase (Fragment) OS=Rattus norvegicus GN=Pnp PE=4 SV=2 - [D3ZXK9_RAT]	18.1484	17.71	2	4	4	7	3.33363e+06	288	32.1441	7.82568
P0CG51	Polyubiquitin-B OS=Rattus norvegicus GN=Ubb PE=1 SV=1 - [UBB_RAT]	17.8435	72.13	13	6	6	8	5.96711e+07	305	34.3475	7.53271
O88989	Malate dehydrogenase, cytoplasmic OS=Rattus norvegicus GN=Mdh1 PE=1 SV=3 - [MDHC_RAT]	17.7596	14.07	1	5	5	7	1.11344e+07	334	36.46	6.58057
P31044	Phosphatidylethanolamine-binding protein 1 OS=Rattus norvegicus GN=Pebp1 PE=1 SV=3 - [PEBP1_RAT]	17.7447	25.13	1	3	3	5	1.01921e+07	187	20.7884	5.79541
P00762	Anionic trypsin-1 OS=Rattus norvegicus GN=Prss1 PE=1 SV=1 - [TRY1_RAT]	17.673	8.13	1	1	1	4	5.91093e+08	246	25.9427	4.89404
P07150	Annexin A1 OS=Rattus norvegicus GN=Anxa1 PE=1 SV=2 - [ANXA1_RAT]	17.5022	10.98	1	3	3	6	1.33485e+06	346	38.8049	7.34229
P35704	Peroxiredoxin-2 OS=Rattus norvegicus GN=Prdx2 PE=1 SV=3 - [PRDX2_RAT]	17.4375	18.18	1	3	3	6	2.25834e+07	198	21.7701	5.59229
P18422	Proteasome subunit alpha type-3 OS=Rattus norvegicus GN=Psma3 PE=1 SV=3 - [PSA3_RAT]	17.0117	21.57	2	5	5	9	5.7124e+06	255	28.4011	5.43994
Q62950	Dihydropyrimidinase-related protein 1 OS=Rattus norvegicus GN=Crmp1 PE=1 SV=1 - [DPYL1_RAT]	16.8992	12.76	1	4	6	7	1.28316e+07	572	62.1566	7.12256
P05197	Elongation factor 2 OS=Rattus norvegicus GN=Eef2 PE=1 SV=4 - [EF2_RAT]	16.8529	6.41	2	6	6	8	2.12007e+06	858	95.2229	6.82959
Q7TPB1	T-complex protein 1 subunit delta OS=Rattus norvegicus GN=Cct4 PE=1 SV=3 - [TCPD_RAT]	16.6356	9.28	1	4	4	6	3.40891e+06	539	58.0628	8.01611
Q6AY84	Secernin-1 OS=Rattus norvegicus GN=Scrn1 PE=1 SV=1 - [SCRN1_RAT]	16.5145	5.8	1	2	2	5	2.17775e+06	414	46.3666	4.84326
Q6IFW0	RCG32608 OS=Rattus norvegicus GN=Krt33b PE=2 SV=1 - [Q6IFW0_RAT]	16.3398	13.37	15	3	5	12	1.27941e+09	404	45.8062	4.81787
P70645	Bleomycin hydrolase OS=Rattus norvegicus GN=Blmh PE=1 SV=1 - [BLMH_RAT]	16.2154	8.15	3	4	4	7	7.9227e+06	454	52.2888	6.48096
P09606	Glutamine synthetase OS=Rattus norvegicus GN=Glul PE=1 SV=3 - [GLNA_RAT]	16.1727	14.21	1	4	4	6	9.16353e+06	373	42.2403	7.07861
D4ABT0	Guanine nucleotide-binding protein G(o) subunit alpha OS=Rattus norvegicus GN=Gnao1 PE=4 SV=2 - [D4ABT0_RAT]	16.1115	10.73	18	3	3	6	1.03576e+07	354	39.995	6.01123
O88767	Protein DJ-1 OS=Rattus norvegicus GN=Park7 PE=1 SV=1 - [PARK7_RAT]	15.9606	21.69	3	4	4	7	6.1819e+06	189	19.9614	6.771
O35567	Bifunctional purine biosynthesis protein PURH OS=Rattus norvegicus GN=Atic PE=1 SV=2 - [PUR9_RAT]	15.6659	9.63	1	4	4	6	1.7124e+06	592	64.1682	7.13721
P18421	Proteasome subunit beta type-1 OS=Rattus norvegicus GN=Psmb1 PE=1 SV=3 - [PSB1_RAT]	15.4802	17.5	2	4	4	7	1.27285e+07	240	26.4623	7.35693
Q6IFX1	Keratin, type I cytoskeletal 24 OS=Rattus norvegicus GN=Krt24 PE=3 SV=1 - [K1C24_RAT]	14.814	3.67	6	1	2	8	1.90667e+09	491	52.3472	5.0083
Q62703	Reticulocalbin-2 OS=Rattus norvegicus GN=Rcn2 PE=1 SV=2 - [RCN2_RAT]	14.6329	13.13	1	2	2	3	798081	320	37.4099	4.41162
Q71DI1	Dermcidin OS=Rattus norvegicus PE=2 SV=1 - [Q71DI1_RAT]	14.4151	35.45	1	3	3	5	3.31829e+07	110	11.2768	6.53662
M0R6Y8	Phosphoglycerate kinase OS=Rattus norvegicus GN=RGD1560402 PE=3 SV=1 - [M0R6Y8_RAT]	13.9909	20	5	6	6	8	8.83724e+06	395	41.9347	6.78564
Q5XIM9	T-complex protein 1 subunit beta OS=Rattus norvegicus GN=Cct2 PE=1 SV=3 - [TCPB_RAT]	13.7795	6.36	1	2	2	4	1.15022e+06	535	57.4221	6.45557
P62815	V-type proton ATPase subunit B, brain isoform OS=Rattus norvegicus GN=Atp6v1b2 PE=1 SV=1 - [VATB2_RAT]	13.769	9.59	1	4	4	6	2.21306e+06	511	56.5149	5.80811
G3V6D3	ATP synthase subunit beta OS=Rattus norvegicus GN=Atp5b PE=3 SV=1 - [G3V6D3_RAT]	13.6537	10.02	3	4	4	5	2.14354e+06	529	56.3095	5.2749
P02770	Serum albumin OS=Rattus norvegicus GN=Alb PE=1 SV=2 - [ALBU_RAT]	13.6496	4.93	1	3	3	6	2.42077e+07	608	68.6861	6.48096
D3ZVQ0	Ubiquitin carboxyl-terminal hydrolase OS=Rattus norvegicus GN=Usp5 PE=3 SV=1 - [D3ZVQ0_RAT]	13.5536	3.61	1	3	3	6	2.13524e+06	858	95.7183	5.0083
G3V7Y3	ATP synthase subunit delta, mitochondrial OS=Rattus norvegicus GN=Atp5d PE=3 SV=1 - [G3V7Y3_RAT]	13.4579	13.69	2	2	2	5	9.12641e+06	168	17.5522	5.23682
D3ZKA0	Protein Serpinb13 OS=Rattus norvegicus GN=Serpinb13 PE=3 SV=1 - [D3ZKA0_RAT]	13.1459	3.34	1	2	2	4	2.97664e+07	389	44.2215	5.92236
A0A0A0MXY5	ATP-dependent 6-phosphofructokinase, platelet type OS=Rattus norvegicus GN=Pfkp PE=4 SV=1 - [A0A0A0MXY5_RAT]	12.9749	5.47	2	4	4	5	4.71182e+06	786	85.3871	7.15186
F1M978	Inositol monophosphatase 1 OS=Rattus norvegicus GN=Impa1 PE=4 SV=1 - [F1M978_RAT]	12.8677	15.16	2	4	4	5	1.07252e+07	277	30.4754	5.2876
Q6LDP3	Rat glutathione S-transferase OS=Rattus norvegicus GN=Gstm1 PE=2 SV=1 - [Q6LDP3_RAT]	12.826	11.57	4	2	2	5	3.83647e+06	216	25.669	8.19189
P30835	ATP-dependent 6-phosphofructokinase, liver type OS=Rattus norvegicus GN=Pfkl PE=2 SV=3 - [PFKAL_RAT]	12.8192	6.03	2	3	4	6	2.10517e+06	780	85.2844	7.40088
P52296	Importin subunit beta-1 OS=Rattus norvegicus GN=Kpnb1 PE=1 SV=1 - [IMB1_RAT]	12.6959	1.71	2	1	1	3	791030	875	97.062	4.76709
G3V7Q6	Proteasome subunit beta type OS=Rattus norvegicus GN=Psmb5 PE=3 SV=1 - [G3V7Q6_RAT]	12.6073	18.25	2	4	4	5	6.40545e+06	263	28.5412	7.02002
F1LQQ1	Malic enzyme (Fragment) OS=Rattus norvegicus GN=Me1 PE=3 SV=2 - [F1LQQ1_RAT]	12.2837	3.28	2	1	1	3	1.91831e+06	549	61.0735	5.92236
M0RDM4	Histone H2A OS=Rattus norvegicus GN=LOC680322 PE=3 SV=1 - [M0RDM4_RAT]	12.205	21.88	19	2	2	4	6.71255e+06	128	14.0599	11.0337
Q6P9V6	Proteasome subunit alpha type OS=Rattus norvegicus GN=Psma5 PE=2 SV=1 - [Q6P9V6_RAT]	12.1617	24.9	2	4	4	5	7.696e+06	241	26.3942	4.79248
D3ZY51	Plakophilin 1 (Predicted) OS=Rattus norvegicus GN=Pkp1 PE=4 SV=2 - [D3ZY51_RAT]	12.1452	4.3	1	2	2	4	2.90292e+06	605	67.1746	8.70459
P23606	Protein-glutamine gamma-glutamyltransferase K OS=Rattus norvegicus GN=Tgm1 PE=2 SV=1 - [TGM1_RAT]	11.8143	5.95	1	4	4	4	5.32078e+06	824	90.7129	6.46826
Q91XL4	G-protein beta-2 subunit (Fragment) OS=Rattus norvegicus PE=2 SV=1 - [Q91XL4_RAT]	11.8109	12	11	1	3	6	1.19892e+07	225	24.4277	5.36377
Q9QYU4	Ketimine reductase mu-crystallin OS=Rattus norvegicus GN=Crym PE=1 SV=1 - [CRYM_RAT]	11.8062	10.54	2	2	2	4	2.97519e+06	313	33.5331	5.52881
B2GV73	Actin-related protein 2/3 complex subunit 3 OS=Rattus norvegicus GN=Arpc3 PE=2 SV=1 - [B2GV73_RAT]	11.8006	7.3	1	1	1	3	409630	178	20.5223	8.60205
Q4QQV4	Dead end homolog 1 (Zebrafish) OS=Rattus norvegicus GN=Hars PE=2 SV=1 - [Q4QQV4_RAT]	11.5892	5.91	2	3	3	4	2.85787e+06	508	57.3241	6.11279
F1LSQ6	Proteasome subunit alpha type OS=Rattus norvegicus GN=Psma7 PE=3 SV=1 - [F1LSQ6_RAT]	11.5205	13.39	4	3	3	4	7.44314e+06	254	28.3809	8.45557
P35559	Insulin-degrading enzyme OS=Rattus norvegicus GN=Ide PE=1 SV=1 - [IDE_RAT]	11.4094	4.22	1	4	4	5	2.18021e+06	1019	117.635	6.60986
Q91ZN1	Coronin-1A OS=Rattus norvegicus GN=Coro1a PE=1 SV=3 - [COR1A_RAT]	11.3136	5.64	1	2	2	4	2.88933e+06	461	51.033	6.48096
D3ZQQ5	Dynamin-1 OS=Rattus norvegicus GN=Dnm1 PE=3 SV=2 - [D3ZQQ5_RAT]	11.304	5.99	11	5	5	5	4.92291e+06	851	95.8002	6.7417
D3ZEN5	Peroxiredoxin-5, mitochondrial (Fragment) OS=Rattus norvegicus GN=Prdx5 PE=4 SV=2 - [D3ZEN5_RAT]	11.1943	18.63	2	2	2	3	1.39904e+06	161	16.9149	7.23975
M0RAQ6	Hexokinase-1 OS=Rattus norvegicus GN=Hk1 PE=3 SV=1 - [M0RAQ6_RAT]	11.1881	4.77	1	1	4	6	3.55344e+06	880	97.9557	6.87354
F1LRV4	Heat shock 70 kDa protein 4 OS=Rattus norvegicus GN=Hspa4 PE=3 SV=1 - [F1LRV4_RAT]	10.8093	3.33	2	2	2	3	1.36569e+06	840	93.9671	5.21143
P05708	Hexokinase-1 OS=Rattus norvegicus GN=Hk1 PE=1 SV=4 - [HXK1_RAT]	10.7468	4.68	1	1	4	6	2.72812e+06	918	102.342	6.7124
A0A0A0MY09	Endoplasmin OS=Rattus norvegicus GN=Hsp90b1 PE=4 SV=1 - [A0A0A0MY09_RAT]	10.5901	3.11	2	1	3	5	3.59103e+06	804	92.8424	4.80518
P62963	Profilin-1 OS=Rattus norvegicus GN=Pfn1 PE=1 SV=2 - [PROF1_RAT]	10.3914	21.43	1	2	2	3	1.93002e+06	140	14.9475	8.27979
Q6LDG5	Hypoxanthine-guanine phosporibosyltransferase (Fragment) OS=Rattus norvegicus GN=Hprt1 PE=2 SV=1 - [Q6LDG5_RAT]	10.3874	16.25	3	2	2	3	2.7046e+06	160	17.8724	8.74854
G3V7L8	ATPase, H+ transporting, V1 subunit E isoform 1, isoform CRA_a OS=Rattus norvegicus GN=Atp6v1e1 PE=3 SV=1 - [G3V7L8_RAT]	10.2151	10.18	4	3	3	4	1.4115e+06	226	26.1268	8.42627
F1MAS7	Protein Sdr9c7 OS=Rattus norvegicus GN=Sdr9c7 PE=3 SV=1 - [F1MAS7_RAT]	10.0897	9.9	2	3	3	4	2670587	313	35.0532	8.90967
P97536	Cullin-associated NEDD8-dissociated protein 1 OS=Rattus norvegicus GN=Cand1 PE=1 SV=1 - [CAND1_RAT]	10.0598	3.82	1	4	4	4	1.32815e+06	1230	136.275	5.78271
Q5XI34	Protein Ppp2r1a OS=Rattus norvegicus GN=Ppp2r1a PE=2 SV=1 - [Q5XI34_RAT]	10.048	9.85	3	4	4	5	2.04082e+06	589	65.2809	5.10986
P07824	Arginase-1 OS=Rattus norvegicus GN=Arg1 PE=1 SV=2 - [ARGI1_RAT]	10.02	9.29	1	3	3	5	1.65415e+07	323	34.9513	7.25439
P62804	Histone H4 OS=Rattus norvegicus GN=Hist1h4b PE=1 SV=2 - [H4_RAT]	9.99269	19.42	1	2	2	4	8.19435e+06	103	11.3604	11.356
P85845	Fascin OS=Rattus norvegicus GN=Fscn1 PE=1 SV=2 - [FSCN1_RAT]	9.97543	9.53	1	4	4	6	7.25174e+06	493	54.4569	6.7417
Q0QF43	Malate dehydrogenase (Fragment) OS=Rattus norvegicus GN=Mdh2 PE=2 SV=1 - [Q0QF43_RAT]	9.96061	14.29	2	3	3	3	1.49697e+06	301	31.6726	7.63525
E9PSI7	Alpha-amylase OS=Rattus norvegicus GN=Amy2a3 PE=3 SV=2 - [E9PSI7_RAT]	9.90331	9.25	7	3	3	6	8.28899e+06	508	57.1298	7.79639
P25113	Phosphoglycerate mutase 1 OS=Rattus norvegicus GN=Pgam1 PE=1 SV=4 - [PGAM1_RAT]	9.88534	13.39	1	2	2	4	1.72579e+06	254	28.8139	7.18115
Q3KRD8	Eukaryotic translation initiation factor 6 OS=Rattus norvegicus GN=Eif6 PE=2 SV=1 - [IF6_RAT]	9.81819	14.29	1	2	2	3	1.59532e+06	245	26.5542	4.7417
Q6P502	T-complex protein 1 subunit gamma OS=Rattus norvegicus GN=Cct3 PE=1 SV=1 - [TCPG_RAT]	9.60572	5.5	1	3	3	4	4.04868e+06	545	60.6084	6.63916
F8WG67	Acyl-CoA thioesterase 7, isoform CRA_a OS=Rattus norvegicus GN=Acot7 PE=4 SV=2 - [F8WG67_RAT]	9.54341	12.9	2	4	4	4	9.32398e+06	372	40.942	7.73779
Q6LDS4	Superoxide dismutase [Cu-Zn] OS=Rattus norvegicus GN=Sod1 PE=2 SV=1 - [Q6LDS4_RAT]	9.50094	22.37	3	3	3	5	4.45685e+06	152	15.6997	6.354
P80254	D-dopachrome decarboxylase OS=Rattus norvegicus GN=Ddt PE=1 SV=3 - [DOPD_RAT]	9.41887	32.2	1	3	3	4	9.16829e+06	118	13.1248	6.53662
M0RDJ4	Glia maturation factor beta OS=Rattus norvegicus GN=Gmfb PE=4 SV=1 - [M0RDJ4_RAT]	9.41825	16.2	2	2	2	3	931968	142	16.7395	5.43994
D3ZA32	Protein Gsdma OS=Rattus norvegicus GN=Gsdma PE=4 SV=1 - [D3ZA32_RAT]	9.41417	4.71	1	2	2	4	1.08497e+07	446	49.7829	5.41455
P50399	Rab GDP dissociation inhibitor beta OS=Rattus norvegicus GN=Gdi2 PE=1 SV=2 - [GDIB_RAT]	9.32002	10.79	1	2	4	6	1.13204e+07	445	50.5047	6.25244
P05370	Glucose-6-phosphate 1-dehydrogenase OS=Rattus norvegicus GN=G6pdx PE=1 SV=3 - [G6PD_RAT]	9.05508	4.27	1	2	2	4	1.92438e+06	515	59.3378	6.37939
Q6IRL3	Reticulon OS=Rattus norvegicus GN=Rtn4 PE=2 SV=1 - [Q6IRL3_RAT]	8.9754	3.33	4	1	1	3	389985	360	38.7983	4.75439
Q3MIE4	Synaptic vesicle membrane protein VAT-1 homolog OS=Rattus norvegicus GN=Vat1 PE=1 SV=1 - [VAT1_RAT]	8.79921	3.71	1	1	1	3	1.63175e+06	404	43.091	6.62451
Q1RP74	Protein LOC100911774 OS=Rattus norvegicus GN=LOC100911774 PE=2 SV=1 - [Q1RP74_RAT]	8.79334	6.56	2	1	1	2	5.34899e+06	244	27.2303	4.99561
Q63569	26S protease regulatory subunit 6A OS=Rattus norvegicus GN=Psmc3 PE=2 SV=1 - [PRS6A_RAT]	8.71228	7.06	2	2	2	3	404087	439	49.1294	5.23682
G3V8L3	Lamin A, isoform CRA_b OS=Rattus norvegicus GN=Lmna PE=3 SV=1 - [G3V8L3_RAT]	8.70624	9.02	4	6	6	6	3.02905e+06	665	74.2667	6.97607
G3V8C3	Vimentin OS=Rattus norvegicus GN=Vim PE=3 SV=1 - [G3V8C3_RAT]	8.68828	6.65	8	3	3	5	979487	466	53.6681	5.12256
G3V6X7	Proprotein convertase subtilisin/kexin type 1 inhibitor OS=Rattus norvegicus GN=Pcsk1n PE=4 SV=1 - [G3V6X7_RAT]	8.54278	4.62	2	1	1	3	3.41336e+06	260	27.4558	5.59229
P21213	Histidine ammonia-lyase OS=Rattus norvegicus GN=Hal PE=1 SV=1 - [HUTH_RAT]	8.42968	6.24	1	4	4	4	4.13001e+06	657	72.2385	6.50732
P02091	Hemoglobin subunit beta-1 OS=Rattus norvegicus GN=Hbb PE=1 SV=3 - [HBB1_RAT]	8.23815	12.93	9	2	2	6	1.81125e+07	147	15.9692	8.07471
B2RYG0	Coronin OS=Rattus norvegicus GN=Coro1c PE=2 SV=1 - [B2RYG0_RAT]	7.90481	4.79	2	1	1	2	1.08571e+06	334	37.3917	7.02002
B2RZ72	Actin related protein 2/3 complex, subunit 4 (Predicted), isoform CRA_a OS=Rattus norvegicus GN=Arpc4 PE=2 SV=1 - [B2RZ72_RAT]	7.87238	11.31	1	2	2	3	4.28562e+06	168	19.6543	8.42627
Q05962	ADP/ATP translocase 1 OS=Rattus norvegicus GN=Slc25a4 PE=1 SV=3 - [ADT1_RAT]	7.81488	4.03	6	1	1	3	1.46073e+06	298	32.9682	9.78857
Q63716	Peroxiredoxin-1 OS=Rattus norvegicus GN=Prdx1 PE=1 SV=1 - [PRDX1_RAT]	7.7709	14.57	2	3	3	3	1.13428e+07	199	22.0953	8.1333
P46413	Glutathione synthetase OS=Rattus norvegicus GN=Gss PE=1 SV=1 - [GSHB_RAT]	7.63551	3.59	1	1	1	2	1.29081e+06	474	52.3119	5.66846
O35987	NSFL1 cofactor p47 OS=Rattus norvegicus GN=Nsfl1c PE=1 SV=1 - [NSF1C_RAT]	7.62921	4.32	1	1	1	2	1.24412e+06	370	40.6554	5.14795
M0R4F4	Uncharacterized protein (Fragment) OS=Rattus norvegicus PE=3 SV=1 - [M0R4F4_RAT]	7.61907	7.84	1	1	1	3	1.37443e+06	268	29.0965	8.47021
P50137	Transketolase OS=Rattus norvegicus GN=Tkt PE=1 SV=1 - [TKT_RAT]	7.60592	4.98	2	2	2	2	1.31136e+06	623	67.6006	7.48877
Q4V8H5	Aspartyl aminopeptidase OS=Rattus norvegicus GN=Dnpep PE=2 SV=1 - [Q4V8H5_RAT]	7.50561	6.95	1	3	3	3	1.86862e+06	475	52.5219	7.25439
Q499Q4	Phosphoglucomutase 1 OS=Rattus norvegicus GN=Pgm1 PE=2 SV=2 - [Q499Q4_RAT]	7.36487	10.85	4	5	5	5	4.02503e+06	562	61.3516	6.56592
Q9R170	Branched-chain-amino-acid aminotransferase (Fragment) OS=Rattus norvegicus GN=Bcat1 PE=2 SV=1 - [Q9R170_RAT]	7.33422	3.87	3	1	1	2	894394	362	40.7959	7.41553
D4ACB8	Chaperonin subunit 8 (Theta) (Predicted), isoform CRA_a OS=Rattus norvegicus GN=Cct8 PE=3 SV=1 - [D4ACB8_RAT]	7.23435	6.39	1	3	3	5	2.58076e+06	548	59.5505	5.5415
F1LV89	Protein Rap1gap OS=Rattus norvegicus GN=Rap1gap PE=4 SV=2 - [F1LV89_RAT]	7.13614	2.34	1	1	1	2	547075	727	80.5669	6.15088
M0RC66	Adenylate kinase isoenzyme 1 (Fragment) OS=Rattus norvegicus GN=Ak1 PE=3 SV=1 - [M0RC66_RAT]	7.03723	12.95	2	2	2	3	1.29999e+06	193	21.2782	9.15869
F1M2D3	Uncharacterized protein OS=Rattus norvegicus GN=Vdac1 PE=4 SV=2 - [F1M2D3_RAT]	6.89724	8.16	3	2	2	3	962375	282	30.7135	8.26514
D4A5U3	Protein-glutamine gamma-glutamyltransferase E OS=Rattus norvegicus GN=Tgm3 PE=3 SV=1 - [TGM3_RAT]	6.79062	4.04	1	2	2	4	2.93192e+07	693	77.182	6.88818
Q62951	Dihydropyrimidinase-related protein 4 (Fragment) OS=Rattus norvegicus GN=Dpysl4 PE=1 SV=1 - [DPYL4_RAT]	6.76827	4.08	2	2	2	2	1.13207e+06	564	61.0471	6.771
M0RBP6	Uncharacterized protein OS=Rattus norvegicus PE=3 SV=1 - [M0RBP6_RAT]	6.74442	3.52	2	2	2	3	6.65858e+06	596	66.0415	5.90967
Q5I0E7	Transmembrane emp24 domain-containing protein 9 OS=Rattus norvegicus GN=Tmed9 PE=1 SV=1 - [TMED9_RAT]	6.70766	4.68	1	1	1	2	1.79513e+06	235	27.011	8.26514
P36972	Adenine phosphoribosyltransferase OS=Rattus norvegicus GN=Aprt PE=1 SV=1 - [APT_RAT]	6.66934	12.78	1	2	2	3	692755	180	19.5334	6.56592
P25809	Creatine kinase U-type, mitochondrial OS=Rattus norvegicus GN=Ckmt1 PE=1 SV=1 - [KCRU_RAT]	6.65199	7.66	8	3	3	3	3.34505e+06	418	46.9993	8.48486
P28073	Proteasome subunit beta type-6 OS=Rattus norvegicus GN=Psmb6 PE=1 SV=3 - [PSB6_RAT]	6.54213	13.03	1	3	3	3	7.19452e+06	238	25.2734	4.99561
G3V8T4	DNA damage-binding protein 1 OS=Rattus norvegicus GN=Ddb1 PE=4 SV=1 - [G3V8T4_RAT]	6.51007	2.89	2	2	2	2	1.97437e+06	1140	126.86	5.26221
O35244	Peroxiredoxin-6 OS=Rattus norvegicus GN=Prdx6 PE=1 SV=3 - [PRDX6_RAT]	6.43584	14.29	1	3	3	3	5.37657e+06	224	24.803	5.93506
P47728	Calretinin OS=Rattus norvegicus GN=Calb2 PE=1 SV=1 - [CALB2_RAT]	6.38671	7.75	2	2	2	3	3.60755e+06	271	31.3845	5.021
M0RD40	Protein Sik3 OS=Rattus norvegicus GN=Sik3 PE=1 SV=1 - [M0RD40_RAT]	6.33756	1.17	1	1	1	2	1.99553e+07	1366	150.569	7.00537
Q6AYK3	Inositol-3-phosphate synthase 1 OS=Rattus norvegicus GN=Isyna1 PE=3 SV=2 - [INO1_RAT]	6.23933	4.31	1	2	2	3	2.07362e+06	557	60.8451	6.03662
D4A269	Uncharacterized protein OS=Rattus norvegicus PE=4 SV=1 - [D4A269_RAT]	6.18793	11.11	2	1	1	2	3.66039e+06	126	13.7672	7.59131
Q566C7	Diphosphoinositol polyphosphate phosphohydrolase 1 OS=Rattus norvegicus GN=Nudt3 PE=1 SV=1 - [NUDT3_RAT]	6.10469	8.33	1	1	1	2	1.56235e+06	168	19.0836	6.34131
Q5RKI1	Eukaryotic initiation factor 4A-II OS=Rattus norvegicus GN=Eif4a2 PE=1 SV=1 - [IF4A2_RAT]	5.99782	9.58	2	3	3	3	3.48379e+06	407	46.3728	5.47803
Q66HA8	Heat shock protein 105 kDa OS=Rattus norvegicus GN=Hsph1 PE=2 SV=1 - [HS105_RAT]	5.86929	2.68	1	2	2	2	2.48839e+06	858	96.3574	5.5542
Q6GMN8	Actn1 protein OS=Rattus norvegicus GN=Actn1 PE=2 SV=1 - [Q6GMN8_RAT]	5.84763	2.93	10	2	2	2	793906	887	102.547	5.47803
Q00981	Ubiquitin carboxyl-terminal hydrolase isozyme L1 OS=Rattus norvegicus GN=Uchl1 PE=1 SV=2 - [UCHL1_RAT]	5.55078	11.66	1	3	3	3	9.72564e+06	223	24.8224	5.23682
M0RBK1	Phosphoribosyl pyrophosphate synthetase 1-like 1 (Predicted) OS=Rattus norvegicus GN=Prps1l1 PE=3 SV=1 - [M0RBK1_RAT]	5.53513	5.97	4	2	2	3	4.22807e+06	318	34.8299	6.53662
D3ZT27	Protein RGD1565819 OS=Rattus norvegicus GN=Zfp831 PE=1 SV=2 - [D3ZT27_RAT]	5.47347	1.29	1	1	1	2	1.02797e+06	1548	164.841	7.54736
Q5RKJ9	RAB10, member RAS oncogene family OS=Rattus norvegicus GN=Rab10 PE=2 SV=1 - [Q5RKJ9_RAT]	5.37087	11	34	2	2	2	3.60142e+06	200	22.5266	8.38232
O35264	Platelet-activating factor acetylhydrolase IB subunit beta OS=Rattus norvegicus GN=Pafah1b2 PE=1 SV=1 - [PA1B2_RAT]	5.36655	12.23	1	2	2	2	2.53064e+06	229	25.5652	5.92236
D3ZQ18	Protein Nccrp1 OS=Rattus norvegicus GN=Nccrp1 PE=4 SV=1 - [D3ZQ18_RAT]	5.32217	11	1	3	3	3	6.12786e+06	291	32.9838	6.53662
D3ZWE3	Premature ovarian failure 1B (Predicted) OS=Rattus norvegicus GN=Pof1b PE=4 SV=2 - [D3ZWE3_RAT]	5.27265	3.58	1	2	2	2	1.21733e+06	587	67.6174	6.27783
P01946	Hemoglobin subunit alpha-1/2 OS=Rattus norvegicus GN=Hba1 PE=1 SV=3 - [HBA_RAT]	5.21832	14.79	2	2	2	2	5.7549e+06	142	15.3188	7.97217
P63055	Purkinje cell protein 4 OS=Rattus norvegicus GN=Pcp4 PE=1 SV=2 - [PCP4_RAT]	5.21271	16.13	2	1	1	2	2.47558e+06	62	6.80329	6.7124
F1LUM5	Protein Tubal3 OS=Rattus norvegicus GN=Tubal3 PE=3 SV=2 - [F1LUM5_RAT]	5.19019	6.81	1	1	2	2	5.31814e+06	382	42.8053	6.02393
Q5FVH2	Phospholipase D3 OS=Rattus norvegicus GN=Pld3 PE=2 SV=1 - [PLD3_RAT]	5.18085	2.46	1	1	1	2	2.3641e+06	488	54.3644	6.52197
O08618	Phosphoribosyl pyrophosphate synthase-associated protein 2 OS=Rattus norvegicus GN=Prpsap2 PE=2 SV=1 - [KPRB_RAT]	5.15344	5.96	4	2	2	3	1.89151e+06	369	40.8403	7.1665
Q5GFD9	Protein IMPACT OS=Rattus norvegicus GN=Impact PE=2 SV=1 - [IMPCT_RAT]	5.12784	7.26	1	1	1	2	3.40608e+06	317	35.9722	5.16064
Q99MI7	NEDD8-activating enzyme E1 catalytic subunit OS=Rattus norvegicus GN=Uba3 PE=1 SV=1 - [UBA3_RAT]	5.1049	2.38	2	1	1	2	1.50777e+06	462	51.6903	5.45264
Q6IFT2	Type II keratin Kb40 (Fragment) OS=Rattus norvegicus GN=Krt78 PE=2 SV=1 - [Q6IFT2_RAT]	5.07126	2.46	3	1	1	2	2.28182e+07	488	54.2261	5.66846
P18484	AP-2 complex subunit alpha-2 OS=Rattus norvegicus GN=Ap2a2 PE=1 SV=3 - [AP2A2_RAT]	5.05605	2.03	3	2	2	2	1.24497e+06	938	103.979	6.93213
A0JN25	Microtubule-associated protein OS=Rattus norvegicus GN=Mapt PE=2 SV=1 - [A0JN25_RAT]	5.02615	2.92	9	1	1	2	6.12365e+06	343	35.8743	9.43701
Q9JHL4	Drebrin-like protein OS=Rattus norvegicus GN=Dbnl PE=1 SV=1 - [DBNL_RAT]	5.01958	2.52	1	1	1	2	939225	436	48.5825	4.91943
D4AA49	Protein Cntnap3 (Fragment) OS=Rattus norvegicus GN=Cntnap3 PE=4 SV=2 - [D4AA49_RAT]	4.8387	2.45	1	1	1	2	891242	1143	125.404	6.56592
Q8VBU2	Protein NDRG2 OS=Rattus norvegicus GN=Ndrg2 PE=1 SV=1 - [NDRG2_RAT]	4.62434	6.47	1	2	2	2	9.88416e+06	371	40.7531	5.30029
P54311	Guanine nucleotide-binding protein G(I)/G(S)/G(T) subunit beta-1 OS=Rattus norvegicus GN=Gnb1 PE=1 SV=4 - [GBB1_RAT]	4.56577	7.94	9	1	3	3	1.18471e+07	340	37.353	5.99854
B2RYG6	Ubiquitin thioesterase OTUB1 OS=Rattus norvegicus GN=Otub1 PE=1 SV=1 - [OTUB1_RAT]	4.47442	9.96	1	3	3	4	3.02253e+06	271	31.2504	4.94482
D3ZQ45	Protein Dsg1 OS=Rattus norvegicus GN=Dsg1 PE=4 SV=1 - [D3ZQ45_RAT]	4.45866	2.08	3	2	2	2	1.17388e+07	914	100.735	4.83057
Q4KLN8	E3 ubiquitin-protein ligase RNF8 OS=Rattus norvegicus GN=Rnf8 PE=2 SV=1 - [RNF8_RAT]	4.42044	1.44	1	1	1	2	1.1404e+08	487	55.5794	8.07471
Q05175	Brain acid soluble protein 1 OS=Rattus norvegicus GN=Basp1 PE=1 SV=2 - [BASP1_RAT]	4.40869	12.73	1	1	1	1	722373	220	21.7774	4.51318
P50475	Alanine--tRNA ligase, cytoplasmic OS=Rattus norvegicus GN=Aars PE=1 SV=3 - [SYAC_RAT]	4.37869	2.38	1	2	2	2	1.82295e+06	968	106.723	5.61768
P13676	Acylamino-acid-releasing enzyme OS=Rattus norvegicus GN=Apeh PE=1 SV=1 - [ACPH_RAT]	4.33325	2.87	2	2	2	2	1.67386e+06	732	81.3314	5.73193
P81155	Voltage-dependent anion-selective channel protein 2 OS=Rattus norvegicus GN=Vdac2 PE=1 SV=2 - [VDAC2_RAT]	4.32336	7.46	4	2	2	2	960549	295	31.7256	7.48877
Q5I0D5	Phospholysine phosphohistidine inorganic pyrophosphate phosphatase OS=Rattus norvegicus GN=Lhpp PE=2 SV=1 - [LHPP_RAT]	4.31898	2.96	1	1	1	2	4.82893e+06	270	29.1717	5.38916
Q6S3A1	Plectin 4 OS=Rattus norvegicus PE=2 SV=1 - [Q6S3A1_RAT]	4.30803	0.85	13	3	3	3	2.0405e+06	4451	506.371	5.68115
G3V6S2	Aconitate hydratase OS=Rattus norvegicus GN=Aco1 PE=3 SV=1 - [G3V6S2_RAT]	4.2684	1.91	2	1	1	1	621020	889	98.1304	7.38623
P34067	Proteasome subunit beta type-4 OS=Rattus norvegicus GN=Psmb4 PE=1 SV=2 - [PSB4_RAT]	4.25352	7.22	2	2	2	2	7.15695e+06	263	29.1784	6.91748
Q2KMM4	Arachidonate 12-lipoxygenase, 12R-type OS=Rattus norvegicus GN=Alox12b PE=1 SV=1 - [LX12B_RAT]	4.22033	2.43	1	1	1	1	5.31754e+06	701	80.6885	6.88818
D3ZPR0	Chromosome segregation 1-like (S. cerevisiae) (Predicted) OS=Rattus norvegicus GN=Cse1l PE=4 SV=1 - [D3ZPR0_RAT]	4.18311	0.82	1	1	1	2		971	110.144	5.77002
G3V9A5	Keratinocyte proline-rich protein OS=Rattus norvegicus GN=Kprp PE=4 SV=1 - [G3V9A5_RAT]	4.11588	1.43	2	1	1	2	1.77969e+07	699	76.3621	8.38232
C6L8E0	Drebrin E OS=Rattus norvegicus GN=Dbn1 PE=2 SV=1 - [C6L8E0_RAT]	4.10254	1.82	2	1	1	1	955357	661	72.5569	4.44971
Q08163	Adenylyl cyclase-associated protein 1 OS=Rattus norvegicus GN=Cap1 PE=1 SV=3 - [CAP1_RAT]	4.09452	5.91	1	2	2	2	1.23611e+06	474	51.5565	7.51807
F1M6N0	Protein LOC686143 OS=Rattus norvegicus GN=LOC686143 PE=4 SV=2 - [F1M6N0_RAT]	4.08125	2.81	1	1	1	3	2.02566e+07	285	29.4177	7.84033
P40307	Proteasome subunit beta type-2 OS=Rattus norvegicus GN=Psmb2 PE=1 SV=1 - [PSB2_RAT]	4.04251	7.46	1	1	1	1	2.91756e+06	201	22.8977	7.44482
Q5XI73	Rho GDP-dissociation inhibitor 1 OS=Rattus norvegicus GN=Arhgdia PE=1 SV=1 - [GDIR1_RAT]	4.0179	7.84	1	1	1	1	6.41117e+06	204	23.3928	5.19873
Q5XI32	F-actin-capping protein subunit beta OS=Rattus norvegicus GN=Capzb PE=1 SV=1 - [CAPZB_RAT]	3.98017	6.25	1	2	2	3	2.88935e+06	272	30.6094	5.99854
Q4FZY0	EF-hand domain-containing protein D2 OS=Rattus norvegicus GN=Efhd2 PE=1 SV=1 - [EFHD2_RAT]	3.96969	7.95	1	2	2	2	1.37717e+06	239	26.7425	5.07178
P24268	Cathepsin D OS=Rattus norvegicus GN=Ctsd PE=1 SV=1 - [CATD_RAT]	3.95821	4.42	2	1	1	1	1.31054e+07	407	44.6519	7.09326
D3ZZ65	Protein Casp14 OS=Rattus norvegicus GN=Casp14 PE=3 SV=1 - [D3ZZ65_RAT]	3.93812	3.25	1	1	1	2	1.03352e+07	246	28.2371	5.32568
P62494	Ras-related protein Rab-11A OS=Rattus norvegicus GN=Rab11a PE=1 SV=3 - [RB11A_RAT]	3.90556	4.63	2	1	1	2	1.62137e+06	216	24.3784	6.56592
Q5M7A7	CB1 cannabinoid receptor-interacting protein 1 OS=Rattus norvegicus GN=Cnrip1 PE=1 SV=1 - [CNRP1_RAT]	3.90018	9.76	1	1	1	1	3.99801e+06	164	18.6466	7.85498
Q64715	Microtubule-associated protein OS=Rattus norvegicus GN=Map2 PE=2 SV=1 - [Q64715_RAT]	3.89987	0.66	4	1	1	1	782117	1825	198.446	4.84326
G3V9D1	Phosphoinositide phospholipase C OS=Rattus norvegicus GN=Plcd1 PE=4 SV=1 - [G3V9D1_RAT]	3.88959	2.12	3	1	1	1	418489	756	85.8559	6.34131
F1M2F6	Pyruvate kinase (Fragment) OS=Rattus norvegicus PE=3 SV=2 - [F1M2F6_RAT]	3.82957	1.78	1	1	1	2	1.43219e+08	505	55.0645	7.40088
P68182	cAMP-dependent protein kinase catalytic subunit beta OS=Rattus norvegicus GN=Prkacb PE=1 SV=2 - [KAPCB_RAT]	3.75905	5.98	5	2	2	2	4.24997e+06	351	40.682	8.55811
Q6AYS7	Aminoacylase-1A OS=Rattus norvegicus GN=Acy1a PE=1 SV=1 - [ACY1A_RAT]	3.75067	6.37	2	2	2	2	1.50953e+06	408	45.7751	6.48096
D4A9K3	D-tyrosyl-tRNA(Tyr) deacylase OS=Rattus norvegicus GN=Dtd1 PE=3 SV=1 - [D4A9K3_RAT]	3.71387	8.62	2	1	1	1	4.01376e+06	174	19.6241	8.1626
P85971	6-phosphogluconolactonase OS=Rattus norvegicus GN=Pgls PE=1 SV=1 - [6PGL_RAT]	3.6697	6.23	2	1	1	1	1.77631e+06	257	27.2173	5.84619
P85968	6-phosphogluconate dehydrogenase, decarboxylating OS=Rattus norvegicus GN=Pgd PE=1 SV=1 - [6PGD_RAT]	3.65267	3.52	3	1	1	1	2.23611e+06	483	53.202	7.02002
P19132	Ferritin heavy chain OS=Rattus norvegicus GN=Fth1 PE=1 SV=3 - [FRIH_RAT]	3.61964	3.85	7	1	1	2	7.37651e+06	182	21.1133	6.30322
Q5RKI0	WD repeat-containing protein 1 OS=Rattus norvegicus GN=Wdr1 PE=1 SV=3 - [WDR1_RAT]	3.61531	2.97	1	2	2	2	8.97203e+06	606	66.1399	6.62451
O70196	Prolyl endopeptidase OS=Rattus norvegicus GN=Prep PE=1 SV=1 - [PPCE_RAT]	3.6113	2.39	1	1	1	1		710	80.6899	5.93506
P18420	Proteasome subunit alpha type-1 OS=Rattus norvegicus GN=Psma1 PE=1 SV=2 - [PSA1_RAT]	3.59429	6.46	1	2	2	2	8.59283e+06	263	29.4988	6.60986
Q9QYB9	Bile acid sensitive methotrexate carrier 2 OS=Rattus norvegicus GN=Slc19a1 PE=2 SV=1 - [Q9QYB9_RAT]	3.58005	2.13	6	1	1	2	2.26728e+06	329	37.8178	9.39307
D3ZME6	Uncharacterized protein (Fragment) OS=Rattus norvegicus GN=Syncrip PE=4 SV=2 - [D3ZME6_RAT]	3.53839	3.85	4	1	1	1	404815	338	38.257	9.05615
D3Z8J0	Protein RGD1564425 OS=Rattus norvegicus GN=RGD1564425 PE=4 SV=1 - [D3Z8J0_RAT]	3.53307	7.8	3	1	1	1	6.55598e+06	205	23.0305	6.18896
G3V8Q6	Protein kinase, cAMP-dependent, regulatory, type 2, alpha, isoform CRA_a OS=Rattus norvegicus GN=Prkar2a PE=4 SV=1 - [G3V8Q6_RAT]	3.51801	5.74	5	2	2	2	2.14661e+06	401	45.4517	4.93213
G3V7M3	Protein Krt23 OS=Rattus norvegicus GN=Krt23 PE=3 SV=1 - [G3V7M3_RAT]	3.50454	4.03	4	1	2	2	1.5984e+07	422	48.0532	6.04932
B0BNA5	Coactosin-like protein OS=Rattus norvegicus GN=Cotl1 PE=1 SV=1 - [COTL1_RAT]	3.45089	9.86	1	2	2	2	4.85491e+06	142	15.922	5.40186
Q5PPJ7	Psmd1 protein (Fragment) OS=Rattus norvegicus GN=Psmd1 PE=2 SV=1 - [Q5PPJ7_RAT]	3.44787	1.42	5	1	1	1	1.36936e+06	846	93.2626	6.39209
B2RYQ2	Serine/threonine-protein phosphatase 2A activator OS=Rattus norvegicus GN=Ppp2r4 PE=2 SV=1 - [B2RYQ2_RAT]	3.36017	4.02	1	1	1	1	2.00118e+06	323	36.5937	6.29053
F1LP82	Ras-related protein Rab-2A (Fragment) OS=Rattus norvegicus GN=Rab2a PE=3 SV=2 - [F1LP82_RAT]	3.30986	6.63	3	1	1	1	2.07953e+06	196	21.6828	6.53662
P11232	Thioredoxin OS=Rattus norvegicus GN=Txn PE=1 SV=2 - [THIO_RAT]	3.30735	12.38	1	1	1	1	4.54086e+06	105	11.6657	4.91943
B4F7A3	Galectin OS=Rattus norvegicus GN=Lgalsl PE=2 SV=1 - [B4F7A3_RAT]	3.2801	11.05	1	1	1	1		172	18.9436	5.35107
P45592	Cofilin-1 OS=Rattus norvegicus GN=Cfl1 PE=1 SV=3 - [COF1_RAT]	3.27014	8.43	1	1	1	1	9181868	166	18.5207	8.08936
D4A233	Poly A binding protein, cytoplasmic 2 (Predicted) OS=Rattus norvegicus GN=Pabpc2 PE=4 SV=1 - [D4A233_RAT]	3.22036	3.33	1	1	1	1	6.06054e+06	630	69.1267	8.89502
B2RYX0	Naca protein OS=Rattus norvegicus GN=Naca PE=2 SV=1 - [B2RYX0_RAT]	3.15472	6.51	2	1	1	1	2.37053e+06	215	23.3697	4.56396
Q64057	Alpha-aminoadipic semialdehyde dehydrogenase OS=Rattus norvegicus GN=Aldh7a1 PE=1 SV=2 - [AL7A1_RAT]	3.14324	2.6	1	1	1	1	1.86801e+06	539	58.7114	7.86963
Q6PEC4	S-phase kinase-associated protein 1 OS=Rattus norvegicus GN=Skp1 PE=2 SV=3 - [SKP1_RAT]	3.12832	7.36	1	1	1	1	925845	163	18.6603	4.53857
M0R544	Glucosidase, alpha, acid, isoform CRA_a OS=Rattus norvegicus GN=Gaa PE=3 SV=1 - [M0R544_RAT]	3.12549	1.89	2	1	1	1	1.50091e+06	953	106.136	5.68115
Q9EQS0	Transaldolase OS=Rattus norvegicus GN=Taldo1 PE=1 SV=2 - [TALDO_RAT]	3.07109	3.56	1	1	1	1	638410	337	37.4365	7.03467
P55260	Annexin A4 OS=Rattus norvegicus GN=Anxa4 PE=1 SV=3 - [ANXA4_RAT]	3.04196	5.02	2	1	1	1	228348	319	35.826	5.43994
G3V774	F-box only protein 2 OS=Rattus norvegicus GN=Fbxo2 PE=4 SV=1 - [G3V774_RAT]	3.00877	10.47	2	2	2	3	3.69663e+06	296	33.6519	4.33545
Q5XHY5	Threonine--tRNA ligase, cytoplasmic OS=Rattus norvegicus GN=Tars PE=2 SV=1 - [SYTC_RAT]	2.98851	1.73	1	1	1	1	1.48891e+06	695	80.5245	6.94678
F1LRS2	Protein Dock7 OS=Rattus norvegicus GN=Dock7 PE=4 SV=2 - [F1LRS2_RAT]	2.98441	0.76	1	1	1	2	2.83255e+07	2118	239.908	7.13721
A0A096MK73	Protein RGD1565395 OS=Rattus norvegicus GN=RGD1565395 PE=4 SV=1 - [A0A096MK73_RAT]	2.95546	10.32	2	1	1	1	4.70118e+06	126	14.6277	7.48877
B0BMX3	Protein S100a16 OS=Rattus norvegicus GN=S100a16 PE=2 SV=1 - [B0BMX3_RAT]	2.94998	8.94	1	1	1	1	1.38114e+06	123	14.2148	5.51611
Q6IMF1	Keratin, type II cytoskeletal 80 OS=Rattus norvegicus GN=Krt80 PE=3 SV=1 - [K2C80_RAT]	2.92864	2.88	1	1	1	1	1.78332e+06	452	50.5188	6.20166
A0A0A6YYD8	Uncharacterized protein (Fragment) OS=Rattus norvegicus PE=4 SV=1 - [A0A0A6YYD8_RAT]	2.88025	5.59	5	1	1	1	1.18879e+07	179	20.3446	6.80029
M0RCT6	Protein LOC100363427 (Fragment) OS=Rattus norvegicus GN=LOC100363427 PE=4 SV=1 - [M0RCT6_RAT]	2.87975	13.53	1	1	1	1	1.03889e+06	170	19.5727	4.66553
G3V733	Synapsin-2 OS=Rattus norvegicus GN=Syn2 PE=4 SV=2 - [G3V733_RAT]	2.87358	1.77	2	1	1	1	1.72421e+06	564	60.7894	8.06006
P00507	Aspartate aminotransferase, mitochondrial OS=Rattus norvegicus GN=Got2 PE=1 SV=2 - [AATM_RAT]	2.83998	2.79	1	1	1	1	2.18663e+06	430	47.2841	8.99756
P09527	Ras-related protein Rab-7a OS=Rattus norvegicus GN=Rab7a PE=1 SV=2 - [RAB7A_RAT]	2.83493	6.28	1	1	1	1	1.39294e+06	207	23.4889	6.69775
P04762	Catalase OS=Rattus norvegicus GN=Cat PE=1 SV=3 - [CATA_RAT]	2.82015	2.28	1	1	1	1	7.4909e+06	527	59.7195	7.50342
P24155	Thimet oligopeptidase OS=Rattus norvegicus GN=Thop1 PE=1 SV=4 - [THOP1_RAT]	2.81656	2.33	1	1	1	1	545654	687	78.3354	5.93506
Q3T1K5	F-actin-capping protein subunit alpha-2 OS=Rattus norvegicus GN=Capza2 PE=1 SV=1 - [CAZA2_RAT]	2.80147	6.29	2	2	2	2	4.07456e+06	286	32.9466	5.84619
M0R4D7	Protein LOC100910820 OS=Rattus norvegicus GN=LOC100910820 PE=3 SV=1 - [M0R4D7_RAT]	2.76683	3.11	3	1	1	1	352367	483	51.6642	8.88037
Q6AXS5	Plasminogen activator inhibitor 1 RNA-binding protein OS=Rattus norvegicus GN=Serbp1 PE=1 SV=2 - [PAIRB_RAT]	2.72106	3.93	1	1	1	1	250641	407	44.7273	8.54346
P51635	Alcohol dehydrogenase [NADP(+)] OS=Rattus norvegicus GN=Akr1a1 PE=1 SV=2 - [AK1A1_RAT]	2.71356	4.62	1	1	1	1	1.70123e+06	325	36.4829	7.31299
F1LTZ6	Protein RGD1559921 (Fragment) OS=Rattus norvegicus GN=RGD1559921 PE=4 SV=1 - [F1LTZ6_RAT]	2.70195	8.04	4	1	1	1	1.32077e+07	112	12.3281	6.771
Q5I0D7	Xaa-Pro dipeptidase OS=Rattus norvegicus GN=Pepd PE=2 SV=1 - [PEPD_RAT]	2.66696	3.46	1	2	2	2	3.92304e+06	492	54.7149	5.94775
B4F772	Heat shock 70 kDa protein 4L OS=Rattus norvegicus GN=Hspa4l PE=2 SV=1 - [B4F772_RAT]	2.63699	1.67	1	1	1	1	704929	838	94.1614	5.69385
B5DEP1	Pdcd6 protein OS=Rattus norvegicus GN=Pdcd6 PE=2 SV=1 - [B5DEP1_RAT]	2.60893	5.82	2	1	1	1	1.12723e+06	189	21.6867	5.64307
D4ADN6	Protein Fsd2 OS=Rattus norvegicus GN=Fsd2 PE=4 SV=2 - [D4ADN6_RAT]	2.59372	1.61	1	1	1	1	4.28398e+06	746	84.6439	4.94482
Q5BJY2	Cct6a protein (Fragment) OS=Rattus norvegicus GN=Cct6a PE=2 SV=1 - [Q5BJY2_RAT]	2.5706	4.92	3	1	1	1	1.74051e+06	244	26.2128	6.90283
D3ZWR4	Copine VII (Predicted), isoform CRA_b OS=Rattus norvegicus GN=Cpne7 PE=4 SV=1 - [D3ZWR4_RAT]	2.56634	1.85	12	1	1	1	2.30024e+06	486	54.0848	5.03369
Q62789	UDP-glucuronosyltransferase 2B7 OS=Rattus norvegicus GN=Ugt2b7 PE=2 SV=1 - [UD2B7_RAT]	2.55572	3.58	1	1	1	1	6.06054e+06	530	60.05	8.26514
P12785	Fatty acid synthase OS=Rattus norvegicus GN=Fasn PE=1 SV=3 - [FAS_RAT]	2.54817	0.8	1	2	2	2	1.67172e+06	2505	272.478	6.39209
D4A8D3	Ferritin OS=Rattus norvegicus GN=LOC100363177 PE=3 SV=1 - [D4A8D3_RAT]	2.53671	7.1	5	1	1	1	745046	183	20.7477	6.65381
Q6TXF7	LRRGT00042 OS=Rattus norvegicus PE=2 SV=1 - [Q6TXF7_RAT]	2.50293	4.07	1	1	1	1	8.09995e+06	369	40.8562	7.28369
P85970	Actin-related protein 2/3 complex subunit 2 OS=Rattus norvegicus GN=Arpc2 PE=1 SV=1 - [ARPC2_RAT]	2.49577	6	1	2	2	2	3.98999e+06	300	34.3695	7.35693
Q9JHW0	Proteasome subunit beta type-7 OS=Rattus norvegicus GN=Psmb7 PE=1 SV=1 - [PSB7_RAT]	2.49362	3.61	1	1	1	1	2.51086e+06	277	29.9083	7.97217
M0RC45	Protein LOC683536 OS=Rattus norvegicus GN=LOC683536 PE=4 SV=1 - [M0RC45_RAT]	2.49051	7.28	3	1	1	1	6.95198e+06	151	16.9398	6.771
M0RAV0	Uncharacterized protein (Fragment) OS=Rattus norvegicus PE=4 SV=1 - [M0RAV0_RAT]	2.48907	13.98	8	1	1	1	1.24758e+06	93	10.1229	7.12256
Q7M767	Ubiquitin-conjugating enzyme E2 variant 2 OS=Rattus norvegicus GN=Ube2v2 PE=1 SV=3 - [UB2V2_RAT]	2.4736	6.9	2	1	1	1	5.78301e+06	145	16.3422	8.08936
D4ABS5	Uncharacterized protein OS=Rattus norvegicus GN=Pithd1 PE=4 SV=1 - [D4ABS5_RAT]	2.46524	4.09	1	1	1	1	1.51221e+06	220	25.1914	6.27783
D3ZZ32	Prolyl endopeptidase-like OS=Rattus norvegicus GN=Prepl PE=4 SV=2 - [D3ZZ32_RAT]	2.46342	1.38	2	1	1	1	1.17501e+06	726	83.6081	6.72705
P10111	Peptidyl-prolyl cis-trans isomerase A OS=Rattus norvegicus GN=Ppia PE=1 SV=2 - [PPIA_RAT]	2.44782	21.34	2	3	3	4	4.61076e+06	164	17.8628	8.1626
P62944	AP-2 complex subunit beta OS=Rattus norvegicus GN=Ap2b1 PE=1 SV=1 - [AP2B1_RAT]	2.44207	1.28	4	1	1	1		937	104.486	5.37646
A1L108	Actin-related protein 2/3 complex subunit 5-like protein OS=Rattus norvegicus GN=Arpc5l PE=1 SV=2 - [ARP5L_RAT]	2.4306	7.84	2	1	1	1		153	16.9998	6.80029
P62716	Serine/threonine-protein phosphatase 2A catalytic subunit beta isoform OS=Rattus norvegicus GN=Ppp2cb PE=1 SV=1 - [PP2AB_RAT]	2.42513	3.56	2	1	1	1	3.44187e+06	309	35.5523	5.42725
D3ZC55	Heat shock 70kDa protein 12A (Predicted), isoform CRA_a OS=Rattus norvegicus GN=Hspa12a PE=4 SV=1 - [D3ZC55_RAT]	2.41548	1.63	1	1	1	1	2.73958e+06	675	74.7835	6.60986
Q6P7R0	Coronin OS=Rattus norvegicus GN=Coro1b PE=2 SV=1 - [Q6P7R0_RAT]	2.38823	3.78	3	1	1	2	1.12192e+06	291	32.2584	7.89893
F1LPA6	Peptidyl arginine deiminase, type II, isoform CRA_a OS=Rattus norvegicus GN=Padi2 PE=4 SV=2 - [F1LPA6_RAT]	2.3763	1.95	2	1	1	1	1.15294e+06	665	75.2091	5.42725
Q9ERF9	Actin-related protein 3 (Fragment) OS=Rattus norvegicus GN=Actr3 PE=2 SV=1 - [Q9ERF9_RAT]	2.36847	10.59	2	1	1	1	8.33506e+06	85	9.77903	9.24658
M0R6J5	Protein Nom1 (Fragment) OS=Rattus norvegicus GN=Nom1 PE=4 SV=1 - [M0R6J5_RAT]	2.35093	1.98	1	1	1	1	5.03829e+07	809	91.0222	8.93896
D3ZUQ1	Lipase OS=Rattus norvegicus GN=RGD1565682 PE=3 SV=1 - [D3ZUQ1_RAT]	2.3486	4.28	1	1	1	1	6.0926e+06	397	44.4126	6.03662
O35263	Platelet-activating factor acetylhydrolase IB subunit gamma OS=Rattus norvegicus GN=Pafah1b3 PE=2 SV=1 - [PA1B3_RAT]	2.34052	3.88	1	1	1	1	1.84816e+06	232	25.8473	6.93213
E9PSV5	Phosphoserine aminotransferase OS=Rattus norvegicus GN=Psat1 PE=3 SV=2 - [E9PSV5_RAT]	2.33495	2.43	3	1	1	1	1.52878e+06	370	40.4649	7.97217
P63245	Guanine nucleotide-binding protein subunit beta-2-like 1 OS=Rattus norvegicus GN=Gnb2l1 PE=1 SV=3 - [GBLP_RAT]	2.3339	3.15	1	1	1	1	1.24779e+06	317	35.0546	7.69385
D4ABS2	Dynamin-1-like protein (Fragment) OS=Rattus norvegicus GN=Dnm1l PE=3 SV=2 - [D4ABS2_RAT]	2.33007	1.31	2	1	1	1	1.03658e+06	685	76.7304	7.88428
Q32PW9	Psmc6 protein (Fragment) OS=Rattus norvegicus GN=Psmc6 PE=2 SV=1 - [Q32PW9_RAT]	2.30698	3.67	2	1	1	1	401267	381	43.2607	7.48877
D3ZGE2	Myeloperoxidase (Mapped) OS=Rattus norvegicus GN=Mpo PE=4 SV=1 - [D3ZGE2_RAT]	2.30329	2.18	2	1	1	1	1.77814e+06	458	51.8501	9.93506
F1LPS0	Synaptojanin-1 OS=Rattus norvegicus GN=Synj1 PE=4 SV=2 - [F1LPS0_RAT]	2.2676	0.76	4	1	1	1	1.95408e+06	1308	144.265	7.53271
Q07984	Translocon-associated protein subunit delta OS=Rattus norvegicus GN=Ssr4 PE=2 SV=1 - [SSRD_RAT]	2.26235	6.36	1	1	1	1	804249	173	18.9675	5.78271
P35465	Serine/threonine-protein kinase PAK 1 OS=Rattus norvegicus GN=Pak1 PE=1 SV=3 - [PAK1_RAT]	2.26226	2.21	1	1	1	1	1.45517e+06	544	60.5397	5.85889
P15205	Microtubule-associated protein 1B OS=Rattus norvegicus GN=Map1b PE=1 SV=2 - [MAP1B_RAT]	2.2374	0.41	4	1	1	1	3.22339e+06	2459	269.334	4.80518
Q5U318	Astrocytic phosphoprotein PEA-15 OS=Rattus norvegicus GN=Pea15 PE=1 SV=1 - [PEA15_RAT]	2.23523	7.69	1	1	1	1	2.19942e+06	130	15.0308	5.021
M0RE01	Protein LOC100911107 (Fragment) OS=Rattus norvegicus GN=LOC100911107 PE=3 SV=1 - [M0RE01_RAT]	2.21829	3.1	5	1	1	1	1.52812e+06	323	36.8758	6.34131
B2GUW7	Rnase4 protein OS=Rattus norvegicus GN=LOC501979 PE=2 SV=1 - [B2GUW7_RAT]	2.19979	10.53	2	1	1	1	895560	114	12.6987	6.17627
Q9EPB1	Dipeptidyl peptidase 2 OS=Rattus norvegicus GN=Dpp7 PE=1 SV=1 - [DPP2_RAT]	2.19576	2	1	1	1	1	1.80561e+06	500	55.079	5.04639
O88618	Formimidoyltransferase-cyclodeaminase OS=Rattus norvegicus GN=Ftcd PE=1 SV=4 - [FTCD_RAT]	2.19161	5.73	1	1	1	1		541	58.8765	6.0874
Q5XFW3	Ugp2 protein (Fragment) OS=Rattus norvegicus GN=Ugp2 PE=2 SV=1 - [Q5XFW3_RAT]	2.18367	3.07	2	1	1	1	1.6652e+06	293	32.475	6.31592
O54783	Choline/ethanolamine kinase OS=Rattus norvegicus GN=Chkb PE=1 SV=3 - [CHKB_RAT]	2.14845	3.55	1	1	1	1	1.12115e+06	394	45.0714	5.32568
G3V7E3	Granzyme A OS=Rattus norvegicus GN=Gzma PE=3 SV=1 - [G3V7E3_RAT]	2.14319	7.28	2	1	1	1	2.29106e+06	261	28.4759	8.99756
D3ZXL0	Protein Slc26a10 OS=Rattus norvegicus GN=Slc26a10 PE=4 SV=2 - [D3ZXL0_RAT]	2.13994	1.17	1	1	1	1	4.05105e+08	684	73.8763	7.97217
P55053	Fatty acid-binding protein, epidermal OS=Rattus norvegicus GN=Fabp5 PE=1 SV=3 - [FABP5_RAT]	2.13533	6.67	1	1	1	1	3.46598e+07	135	15.0495	7.18115
P09951	Synapsin-1 OS=Rattus norvegicus GN=Syn1 PE=1 SV=3 - [SYN1_RAT]	2.13419	1.42	1	1	1	1	1.54771e+06	704	73.9426	9.80322
G3V9S9	Protein Sec24d OS=Rattus norvegicus GN=Sec24d PE=2 SV=2 - [G3V9S9_RAT]	2.12374	4.52	1	1	1	1		708	79.6125	6.94678
P21670	Proteasome subunit alpha type-4 OS=Rattus norvegicus GN=Psma4 PE=1 SV=1 - [PSA4_RAT]	2.1148	3.45	2	1	1	1	1.80656e+07	261	29.4792	7.72314
Q99MI5	Protein LOC100912604 OS=Rattus norvegicus GN=LOC100912604 PE=2 SV=1 - [Q99MI5_RAT]	2.10448	3.31	1	1	1	1	2.12025e+06	302	33.9748	5.64307
D4A390	Like-glycosyltransferase (Predicted), isoform CRA_a OS=Rattus norvegicus GN=Large PE=4 SV=1 - [D4A390_RAT]	2.08457	5.45	1	1	1	1	7.82065e+06	385	43.6554	7.76709
Q4G022	Arsenical pump-driving ATPase (Fragment) OS=Rattus norvegicus GN=Asna1 PE=2 SV=1 - [Q4G022_RAT]	2.07645	3.04	2	1	1	1	752528	329	36.9227	5.13525
O08557	N(G),N(G)-dimethylarginine dimethylaminohydrolase 1 OS=Rattus norvegicus GN=Ddah1 PE=1 SV=3 - [DDAH1_RAT]	2.06968	7.02	1	2	2	2	3.32053e+06	285	31.4059	6.12549
Q4FZT9	26S proteasome non-ATPase regulatory subunit 2 OS=Rattus norvegicus GN=Psmd2 PE=2 SV=1 - [PSMD2_RAT]	2.06396	1.65	1	1	1	1	1.21598e+06	908	100.124	5.19873
D3ZJF8	Protein Fcgbp OS=Rattus norvegicus GN=Fcgbp PE=4 SV=2 - [D3ZJF8_RAT]	2.05127	0.35	1	1	1	2	1.74909e+09	2582	274.806	5.09717
P10760	Adenosylhomocysteinase OS=Rattus norvegicus GN=Ahcy PE=1 SV=3 - [SAHH_RAT]	2.03881	1.85	2	1	1	1	6.20699e+06	432	47.5072	6.53662
D3ZWS9	Protein Kb23 OS=Rattus norvegicus GN=Kb23 PE=3 SV=2 - [D3ZWS9_RAT]	2.03752	1.64	12	1	1	1	5.40093e+06	427	47.8476	5.38916
O88422	Polypeptide N-acetylgalactosaminyltransferase 5 OS=Rattus norvegicus GN=Galnt5 PE=2 SV=1 - [GALT5_RAT]	2.034	1.94	1	1	1	1		930	105.053	9.11475
G3V6V1	Aminopeptidase B OS=Rattus norvegicus GN=Rnpep PE=4 SV=1 - [G3V6V1_RAT]	2.02932	1.85	3	1	1	1	1.07369e+06	650	72.6423	5.59229
M0R4R1	Protein LOC685718 OS=Rattus norvegicus GN=LOC685718 PE=4 SV=1 - [M0R4R1_RAT]	2.02682	7.56	3	1	1	1	1.02711e+06	172	19.6737	4.83057
F1LVC6	Glutathione S-transferase OS=Rattus norvegicus GN=LOC100365881 PE=3 SV=2 - [F1LVC6_RAT]	2.01747	4.05	2	1	1	1	1.31609e+06	222	25.3193	6.93213
Q9R1K3	P2X purinoceptor OS=Rattus norvegicus GN=P2rx3 PE=2 SV=1 - [Q9R1K3_RAT]	2.01491	2.14	3	1	1	1	4.15742e+07	373	41.7101	8.22119
P24090	Alpha-2-HS-glycoprotein OS=Rattus norvegicus GN=Ahsg PE=1 SV=2 - [FETUA_RAT]	2.00811	1.99	1	1	1	1	4.43674e+06	352	37.9582	6.50732
Q68FQ0	T-complex protein 1 subunit epsilon OS=Rattus norvegicus GN=Cct5 PE=1 SV=1 - [TCPE_RAT]	2.0068	1.48	1	1	1	1	2.64699e+06	541	59.4988	5.71924
P63329	Serine/threonine-protein phosphatase 2B catalytic subunit alpha isoform OS=Rattus norvegicus GN=Ppp3ca PE=1 SV=1 - [PP2BA_RAT]	1.99372	3.45	3	2	2	2	8.23367e+06	521	58.6063	5.85889
D4A5Z6	Protein Ccdc34 OS=Rattus norvegicus GN=Ccdc34 PE=4 SV=1 - [D4A5Z6_RAT]	1.98051	5.14	1	1	1	1	5.23794e+06	311	35.6831	6.97607
D3ZN38	Protein Stard5 OS=Rattus norvegicus GN=Stard5 PE=4 SV=1 - [D3ZN38_RAT]	1.97542	7.51	1	1	1	1		213	23.9398	6.52197
G3V8E9	Kallikrein 8 (Neuropsin/ovasin) OS=Rattus norvegicus GN=Klk8 PE=3 SV=1 - [G3V8E9_RAT]	1.97	3.46	2	1	1	1	1.36775e+06	260	28.4771	8.25049
Q6P7Q4	Lactoylglutathione lyase OS=Rattus norvegicus GN=Glo1 PE=1 SV=3 - [LGUL_RAT]	1.96928	4.89	1	1	1	1	1.20441e+06	184	20.8063	5.31299
F1M7X9	Relaxin receptor 1 OS=Rattus norvegicus GN=Rxfp1 PE=4 SV=1 - [F1M7X9_RAT]	1.94858	1.45	2	1	1	1	2.33537e+06	758	87.1285	8.22119
B2RYM5	Lys-63-specific deubiquitinase BRCC36 OS=Rattus norvegicus GN=Brcc3 PE=2 SV=1 - [BRCC3_RAT]	1.93881	3.44	1	1	1	1	5.24307e+08	291	32.9947	6.26514
O70371	Annexin (Fragment) OS=Rattus norvegicus PE=2 SV=1 - [O70371_RAT]	1.93397	2.98	3	1	1	1	1.65265e+06	302	33.9444	5.10986
D4A0C3	Protein Hid1 OS=Rattus norvegicus GN=Hid1 PE=4 SV=1 - [D4A0C3_RAT]	1.91058	1.02	1	1	1	1	3.8957e+06	788	88.6984	5.93506
G3V8G4	Brevican core protein OS=Rattus norvegicus GN=Bcan PE=4 SV=1 - [G3V8G4_RAT]	1.90478	0.91	2	1	1	1	2857236	883	95.9411	4.94482
D3ZLQ9	Protein Sh3tc1 OS=Rattus norvegicus GN=Sh3tc1 PE=4 SV=1 - [D3ZLQ9_RAT]	1.90077	0.82	1	1	1	1	494162	1345	149.074	5.96045
G3V6B2	Serine (Or cysteine) peptidase inhibitor, clade B (Ovalbumin), member 10 OS=Rattus norvegicus GN=Serpinb10 PE=3 SV=1 - [G3V6B2_RAT]	1.88462	3.27	2	1	1	1	6.03413e+06	397	45.2857	6.55127
D3ZAV9	Uncharacterized protein OS=Rattus norvegicus PE=3 SV=1 - [D3ZAV9_RAT]	1.88149	4.23	2	1	1	1	898264	213	24.0439	9.96436
Q5XI77	Annexin OS=Rattus norvegicus GN=Anxa11 PE=2 SV=1 - [Q5XI77_RAT]	1.86487	1.99	1	1	1	1	632526	503	54.1258	7.6499
Q9EQ22	C-kit receptor (Fragment) OS=Rattus norvegicus PE=2 SV=1 - [Q9EQ22_RAT]	1.8619	2.48	20	1	1	1	3.94836e+06	323	36.4542	6.78564
Q5PQR5	U3 small nucleolar ribonucleoprotein protein IMP4 OS=Rattus norvegicus GN=Imp4 PE=2 SV=1 - [IMP4_RAT]	1.84489	3.44	2	1	1	1	1.00202e+07	291	33.6355	9.31982
F1LQI5	E3 ubiquitin-protein ligase UBR4 OS=Rattus norvegicus GN=Ubr4 PE=1 SV=1 - [F1LQI5_RAT]	1.84225	0.15	2	1	1	1	2.2854e+06	5194	573.442	6.04932
Q5U2V0	GATA binding protein 5 OS=Rattus norvegicus GN=Gata5 PE=2 SV=1 - [Q5U2V0_RAT]	1.82021	3.96	4	1	1	1		404	42.0716	8.57275
B3EY82	Lipocalin 8 OS=Rattus norvegicus GN=Lcn8 PE=2 SV=1 - [B3EY82_RAT]	1.81827	3.43	1	1	1	1	6.2387e+06	175	19.9892	6.34131
P37805	Transgelin-3 OS=Rattus norvegicus GN=Tagln3 PE=1 SV=2 - [TAGL3_RAT]	1.81093	4.02	1	1	1	1	5881842	199	22.4862	7.32764
D4A6C9	Protein Tom1l2 OS=Rattus norvegicus GN=Tom1l2 PE=4 SV=1 - [D4A6C9_RAT]	1.80799	2.46	1	1	1	1	827722	284	30.6531	4.71631
P17425	Hydroxymethylglutaryl-CoA synthase, cytoplasmic OS=Rattus norvegicus GN=Hmgcs1 PE=1 SV=1 - [HMCS1_RAT]	1.79016	1.73	1	1	1	1	6.2313e+06	520	57.3974	5.88428
D3ZHS5	Protein Cpa4 OS=Rattus norvegicus GN=Cpa4 PE=4 SV=1 - [D3ZHS5_RAT]	1.78862	1.9	1	1	1	1	1.13873e+07	421	47.3557	6.60986
Q6IRJ7	Annexin OS=Rattus norvegicus GN=Anxa7 PE=2 SV=1 - [Q6IRJ7_RAT]	1.78416	2.38	2	1	1	1	6.04281e+07	463	49.9873	6.17627
D3ZRN5	Protein Trove2 OS=Rattus norvegicus GN=Trove2 PE=4 SV=1 - [D3ZRN5_RAT]	1.77342	2.04	1	1	1	1	1.43343e+06	538	60.004	8.06006
D3ZNU5	Protein Agbl3 OS=Rattus norvegicus GN=Agbl3 PE=4 SV=2 - [D3ZNU5_RAT]	1.76984	0.7	2	1	1	1	1.80379e+06	1002	115.989	9.01221
Q64599	Hemiferrin OS=Rattus norvegicus GN=LOC286987 PE=2 SV=1 - [Q64599_RAT]	1.7459	4.17	1	1	1	2	6.58799e+06	216	24.0755	7.66455
D4AB17	Protein LOC100912917 OS=Rattus norvegicus GN=LOC100912917 PE=4 SV=2 - [D4AB17_RAT]	1.74492	1.1	1	1	1	1	681651	1273	136.966	5.69385
Q9NQR8	NADH dehydrogenase [ubiquinone] 1 alpha subcomplex assembly factor 4 OS=Rattus norvegicus GN=Ndufaf4 PE=1 SV=1 - [NDUF4_RAT]	1.72774	4.02	1	1	1	1	9.90337e+07	174	20.1457	8.99756
Q07009	Calpain-2 catalytic subunit OS=Rattus norvegicus GN=Capn2 PE=1 SV=3 - [CAN2_RAT]	1.72711	1.14	1	1	1	1	4.46613e+06	700	79.8688	4.95752
Q10836	Thyrotropin-releasing hormone-degrading ectoenzyme OS=Rattus norvegicus GN=Trhde PE=1 SV=1 - [TRHDE_RAT]	1.70663	0.98	2	1	1	1	1.59342e+06	1025	117.213	6.96143
Q5XI38	Lymphocyte cytosolic protein 1 OS=Rattus norvegicus GN=Lcp1 PE=2 SV=1 - [Q5XI38_RAT]	1.70299	1.59	1	1	1	2	830334	627	70.0777	5.2876
Q5XI72	Eukaryotic translation initiation factor 4H OS=Rattus norvegicus GN=Eif4h PE=1 SV=1 - [IF4H_RAT]	1.66651	5.24	1	1	1	1	1.27835e+06	248	27.3074	7.2251
Q76KC5	CAMP-specific cyclic nucleotide phosphodiesterase PDE8 OS=Rattus norvegicus GN=Pde8b PE=2 SV=1 - [Q76KC5_RAT]	1.6548	0.79	1	1	1	1	8.71483e+07	761	86.1461	6.69775
G3V6U6	Protein Zfp212 OS=Rattus norvegicus GN=Zfp212 PE=4 SV=1 - [G3V6U6_RAT]	1.60179	1.83	2	1	1	1		492	55.3316	8.03076
Q02356	AMP deaminase 2 OS=Rattus norvegicus GN=Ampd2 PE=2 SV=2 - [AMPD2_RAT]	0	1.58	1	1	1	1	884162	824	94.7269	6.50732
Q63622	Disks large homolog 2 OS=Rattus norvegicus GN=Dlg2 PE=1 SV=1 - [DLG2_RAT]	0	1.17	1	1	1	1	7.86551e+06	852	94.8753	6.23975
P02688	Myelin basic protein OS=Rattus norvegicus GN=Mbp PE=1 SV=3 - [MBP_RAT]	0	5.13	3	1	1	1	1.57027e+06	195	21.489	11.2388
Q4QR85	Methylosome protein 50 OS=Rattus norvegicus GN=Wdr77 PE=1 SV=1 - [MEP50_RAT]	0	2.05	3	1	1	1	696006	342	37.0521	5.2749
Q65Z15	Oncostatin-M OS=Rattus norvegicus GN=Osm PE=2 SV=1 - [ONCM_RAT]	0	2.93	1	1	1	1		239	27.0891	10.7993
P11598	Protein disulfide-isomerase A3 OS=Rattus norvegicus GN=Pdia3 PE=1 SV=2 - [PDIA3_RAT]	0	2.18	1	1	1	1	1.54539e+06	505	56.5877	6.21436
P20646	Prostatic acid phosphatase OS=Rattus norvegicus GN=Acpp PE=1 SV=1 - [PPAP_RAT]	0	3.94	1	1	1	1	1.33225e+06	381	43.8222	6.68311
Q5FVJ0	Protein RUFY3 OS=Rattus norvegicus GN=Rufy3 PE=1 SV=1 - [RUFY3_RAT]	0	2.35	1	1	1	2	3.0857e+06	469	52.8732	5.49072
P70564	Serpin B5 OS=Rattus norvegicus GN=Serpinb5 PE=2 SV=1 - [SPB5_RAT]	0	4.53	2	1	1	2	1.38445e+06	375	42.0367	6.1001
Q62634	Vesicular glutamate transporter 1 OS=Rattus norvegicus GN=Slc17a7 PE=1 SV=1 - [VGLU1_RAT]	0	5.18	4	1	1	1	4.4552e+06	560	61.6253	7.34229
D4A2G9	Protein RGD1565297 OS=Rattus norvegicus GN=Ranbp1 PE=4 SV=1 - [D4A2G9_RAT]	0	3.45	1	1	1	1	3.55939e+06	203	23.5817	5.22412
D3ZDK7	Protein Pgp OS=Rattus norvegicus GN=Pgp PE=4 SV=1 - [D3ZDK7_RAT]	0	4.05	1	1	1	1	1.6093e+06	321	34.5787	5.35107
F1LPQ8	SECIS binding protein 2, isoform CRA_a OS=Rattus norvegicus GN=Secisbp2 PE=4 SV=2 - [F1LPQ8_RAT]	0	0.83	2	1	1	1	2.64903e+08	846	93.2257	8.27979
D3ZLI2	Protein Iqcf1 OS=Rattus norvegicus GN=Iqcf1 PE=4 SV=1 - [D3ZLI2_RAT]	0	2.75	1	1	1	1	1.71867e+07	182	21.5822	8.67529
G3V9J7	Rab GTPase-binding effector protein 1 OS=Rattus norvegicus GN=Rabep1 PE=4 SV=1 - [G3V9J7_RAT]	0	0.7	2	1	1	1	3.5392e+07	862	99.3234	4.98291
Q8R3Z7	EH-domain containing 4 OS=Rattus norvegicus GN=Ehd4 PE=2 SV=1 - [Q8R3Z7_RAT]	0	0.92	2	1	1	1	2.3594e+06	541	61.4285	6.75635
D3Z8G9	Protein Cnfn OS=Rattus norvegicus GN=Cnfn PE=4 SV=1 - [D3Z8G9_RAT]	0	17.74	1	1	1	1	655823	124	13.8622	6.48096
Q0VGK5	Protein Tasp1 OS=Rattus norvegicus GN=Tasp1 PE=2 SV=1 - [Q0VGK5_RAT]	0	1.9	1	1	1	1	3.01777e+06	420	44.3342	7.57666
D3ZGU6	Mitogen activated protein kinase kinase kinase 4 (Predicted) OS=Rattus norvegicus GN=Map3k4 PE=4 SV=1 - [D3ZGU6_RAT]	0	0.79	1	1	1	1	3.06248e+06	1387	157.2	6.65381
D4A4U2	Bardet-Biedl syndrome 1 homolog (Human) (Predicted), isoform CRA_a OS=Rattus norvegicus GN=Bbs1 PE=4 SV=1 - [D4A4U2_RAT]	0	3.54	1	1	1	1	1598482	594	65.4006	8.55811
D4AA06	Histone-lysine N-methyltransferase OS=Rattus norvegicus GN=Nsd1 PE=4 SV=1 - [D4AA06_RAT]	0	0.84	1	1	1	1	1.38991e+08	2381	262.332	8.60205
D4A213	Protein Scara5 OS=Rattus norvegicus GN=Scara5 PE=4 SV=2 - [D4A213_RAT]	0	4.27	1	1	1	1	800362	492	53.759	6.72705
A1L1K5	Coiled-coil domain containing 21 OS=Rattus norvegicus GN=Cep85 PE=2 SV=1 - [A1L1K5_RAT]	0	1.8	1	1	1	1		666	74.0323	7.13721
B0BNI3	Orai2 protein OS=Rattus norvegicus GN=Orai2 PE=2 SV=1 - [B0BNI3_RAT]	0	8.4	2	1	1	2		250	28.1808	7.94287
M0R981	Protein Mkl2 (Fragment) OS=Rattus norvegicus GN=Mkl2 PE=4 SV=1 - [M0R981_RAT]	0	0.9	1	1	1	1	2.2023e+06	665	71.7131	9.29053
F1LUA2	Translocating chain-associated membrane protein OS=Rattus norvegicus GN=LOC100361830 PE=3 SV=2 - [F1LUA2_RAT]	0	1.89	1	1	1	1	1.01134e+06	370	43.122	9.40771
D3ZGJ2	Protein Espnl OS=Rattus norvegicus GN=Espnl PE=4 SV=2 - [D3ZGJ2_RAT]	0	1.3	1	1	1	1	7.7499e+06	999	108.319	5.87158
D4A3U3	Protein Ttc18 OS=Rattus norvegicus GN=Cfap70 PE=4 SV=2 - [D4A3U3_RAT]	0	0.64	3	1	1	1	3.11801e+08	1097	123.062	5.63037
D4A5H3	Uncharacterized protein OS=Rattus norvegicus PE=4 SV=1 - [D4A5H3_RAT]	0	5.37	4	1	1	1	1.48712e+06	149	16.8168	4.28467
M0RDC5	Acyl-CoA-binding protein (Fragment) OS=Rattus norvegicus GN=Dbi PE=4 SV=1 - [M0RDC5_RAT]	0	20.93	3	1	1	2	2.40295e+06	86	9.8601	8.82178
E9PTK9	Protein Ankhd1 OS=Rattus norvegicus GN=Ankhd1 PE=4 SV=2 - [E9PTK9_RAT]	0	0.59	1	1	1	1	7.45933e+06	2523	267.241	5.94775
F1M8X1	Protein Gal3st2 OS=Rattus norvegicus GN=Gal3st2 PE=4 SV=2 - [F1M8X1_RAT]	0	3.05	1	1	1	1	1.81159e+07	394	46.6089	8.88037
M0RAL8	Protein Itsn2 OS=Rattus norvegicus GN=Itsn2 PE=4 SV=1 - [M0RAL8_RAT]	0	0.36	2	1	1	1	5.04153e+06	1658	188.791	8.35303
D4AE81	Protein Plekhg1 OS=Rattus norvegicus GN=Plekhg1 PE=4 SV=1 - [D4AE81_RAT]	0	1.16	1	1	1	1	2.14182e+06	1380	155.022	6.13818
F1LXD6	Protein Pitpnm2 (Fragment) OS=Rattus norvegicus GN=Pitpnm2 PE=4 SV=1 - [F1LXD6_RAT]	0	0.72	1	1	1	1	864235	1257	139.507	7.81104
Q63720	SIRR-1 OS=Rattus norvegicus PE=2 SV=1 - [Q63720_RAT]	0	1.95	4	1	2	2	1.29457e+08	410	44.6962	6.55127
D3ZKB6	Protein RGD1562948 OS=Rattus norvegicus GN=RGD1562948 PE=3 SV=2 - [D3ZKB6_RAT]	0	1.76	5	1	1	1	2.54252e+06	341	35.7992	7.04932
D3ZIP1	Protein Kcnrg OS=Rattus norvegicus GN=Kcnrg PE=4 SV=1 - [D3ZIP1_RAT]	0	3.36	1	1	1	1	7.83666e+06	268	30.0095	8.29443
Q0QER8	Isocitrate dehydrogenase 1 (Fragment) OS=Rattus norvegicus GN=Idh1 PE=2 SV=1 - [Q0QER8_RAT]	0	2.38	3	1	1	1	5.25753e+06	378	42.6283	6.37939
A0A096MJA0	RCG44919, isoform CRA_b OS=Rattus norvegicus GN=Tcp1 PE=4 SV=1 - [A0A096MJA0_RAT]	0	4.99	2	2	2	2	2.11447e+06	401	43.8901	7.72314
W4VSR4	Nidogen-2 OS=Rattus norvegicus GN=Nid2 PE=4 SV=1 - [W4VSR4_RAT]	0	0.57	2	1	1	1		1395	152.724	5.43994
A0A096P6L5	Septin-9 OS=Rattus norvegicus GN=Sept9 PE=4 SV=1 - [A0A096P6L5_RAT]	0	1.88	2	1	1	1	57236096	480	54.0806	6.62451
