# Supplementary material for: Mysterious inhibitory cell regulator investigated and found likely to be secretogranin II related
Source: PeerJ. 2017 Oct 13;5:e3833. doi: 10.7717/peerj.3833 (PMC5642266; doi:10.7717/peerj.3833)
Supplement: Supplemental Information 19 — Test total hits 454. [file peerj-05-3833-s019.xlsx]

## Sheet: Sheet1
Accession	Description	Score	Coverage	# Proteins	# Unique Peptides	# Peptides	# PSMs	Area	# AAs	MW [kDa]	calc. pI
F1LMV6	Protein Dsp OS=Rattus norvegicus GN=Dsp PE=1 SV=1 - [F1LMV6_RAT]	386.249	24.37	7	67	67	134	8.41861e+07	2877	332.187	6.82959
Q4FZU2	Keratin, type II cytoskeletal 6A OS=Rattus norvegicus GN=Krt6a PE=1 SV=1 - [K2C6A_RAT]	342.405	20.47	3	2	16	126	5.49344e+09	552	59.2127	7.94287
Q6P6Q2	Keratin, type II cytoskeletal 5 OS=Rattus norvegicus GN=Krt5 PE=1 SV=1 - [K2C5_RAT]	298.025	35.07	6	12	26	119	4.60588e+09	576	61.7877	7.79639
Q6IG05	Keratin, type II cytoskeletal 75 OS=Rattus norvegicus GN=Krt75 PE=3 SV=2 - [K2C75_RAT]	276.378	16.79	4	2	15	105	4.5175e+09	542	58.9906	8.07471
Q6IFU8	Keratin, type I cytoskeletal 17 OS=Rattus norvegicus GN=Krt17 PE=2 SV=1 - [K1C17_RAT]	276.006	48.96	8	8	26	106	6.77926e+09	433	48.0931	5.021
P68370	Tubulin alpha-1A chain OS=Rattus norvegicus GN=Tuba1a PE=1 SV=1 - [TBA1A_RAT]	246.076	47.23	3	6	15	75	2.98154e+08	451	50.1036	5.05908
Q6IFV1	Keratin, type I cytoskeletal 14 OS=Rattus norvegicus GN=Krt14 PE=2 SV=1 - [K1C14_RAT]	244.408	39.38	10	5	20	86	3.94561e+09	485	52.6509	5.16064
Q6IFU7	Keratin, type I cytoskeletal 42 OS=Rattus norvegicus GN=Krt42 PE=3 SV=1 - [K1C42_RAT]	242.32	26.11	10	4	16	86	3.98909e+09	452	50.1819	5.16064
G3V908	Protein Kb15 OS=Rattus norvegicus GN=Kb15 PE=2 SV=2 - [G3V908_RAT]	232.084	17.67	7	1	13	87	4.457e+09	532	57.5738	7.94287
F1M0B2	Uncharacterized protein (Fragment) OS=Rattus norvegicus GN=LOC683295 PE=4 SV=2 - [F1M0B2_RAT]	226.67	10.65	2	1	6	79	5.49344e+09	535	57.715	7.88428
P69897	Tubulin beta-5 chain OS=Rattus norvegicus GN=Tubb5 PE=1 SV=1 - [TBB5_RAT]	219.689	41.67	2	3	15	77	9.49587e+07	444	49.639	4.89404
Q6P0K8	Junction plakoglobin OS=Rattus norvegicus GN=Jup PE=1 SV=1 - [PLAK_RAT]	210.669	53.96	4	31	31	71	9.78984e+07	745	81.7488	6.13818
Q6IMF3	Keratin, type II cytoskeletal 1 OS=Rattus norvegicus GN=Krt1 PE=2 SV=1 - [K2C1_RAT]	206.014	9.92	1	6	10	75	6.61083e+09	625	64.7911	7.86963
Q6IFW6	Keratin, type I cytoskeletal 10 OS=Rattus norvegicus GN=Krt10 PE=3 SV=1 - [K1C10_RAT]	197.272	21.86	9	11	15	85	3.92403e+09	526	56.4705	5.14795
Q3KRE8	Tubulin beta-2B chain OS=Rattus norvegicus GN=Tubb2b PE=1 SV=1 - [TBB2B_RAT]	195.089	38.88	2	1	14	67	9.49587e+07	445	49.9209	4.89404
P85108	Tubulin beta-2A chain OS=Rattus norvegicus GN=Tubb2a PE=1 SV=1 - [TBB2A_RAT]	194	38.88	2	1	14	67	9.49587e+07	445	49.875	4.89404
G3V7C6	RCG45400 OS=Rattus norvegicus GN=Tubb4b PE=3 SV=1 - [G3V7C6_RAT]	184.865	41.57	3	1	15	63	7.57954e+07	445	49.799	4.89404
P07335	Creatine kinase B-type OS=Rattus norvegicus GN=Ckb PE=1 SV=2 - [KCRB_RAT]	169.103	32.02	1	10	10	45	4.96502e+07	381	42.6983	5.66846
Q5XIF6	Tubulin alpha-4A chain OS=Rattus norvegicus GN=Tuba4a PE=2 SV=1 - [TBA4A_RAT]	168.187	45.54	2	5	14	55	1.45241e+08	448	49.8924	5.05908
Q6IFU9	Protein Krt16 OS=Rattus norvegicus GN=Krt16 PE=2 SV=1 - [Q6IFU9_RAT]	160.888	24.84	5	8	14	56	2.57584e+09	463	50.7457	5.12256
Q4QRB4	Tubulin beta-3 chain OS=Rattus norvegicus GN=Tubb3 PE=1 SV=1 - [TBB3_RAT]	154.466	32	1	3	11	49	7.86308e+07	450	50.3862	4.93213
V9GZ85	Actin, cytoplasmic 2 (Fragment) OS=Rattus norvegicus GN=LOC100361457 PE=3 SV=1 - [V9GZ85_RAT]	151.75	63.1	12	9	17	50	7.33446e+08	374	41.5927	5.70654
Q63279	Keratin, type I cytoskeletal 19 OS=Rattus norvegicus GN=Krt19 PE=1 SV=2 - [K1C19_RAT]	145.917	17.62	10	1	11	61	6.77926e+09	403	44.6086	5.31299
Q6IG01	Keratin, type II cytoskeletal 1b OS=Rattus norvegicus GN=Krt77 PE=3 SV=1 - [K2C1B_RAT]	141.908	13.29	2	3	9	51	5.05886e+09	519	57.2196	5.64307
B4F7C2	Protein Tubb4a OS=Rattus norvegicus GN=Tubb4a PE=2 SV=1 - [B4F7C2_RAT]	141.874	34.46	1	1	12	51	5.38357e+07	444	49.5539	4.88135
P47942	Dihydropyrimidinase-related protein 2 OS=Rattus norvegicus GN=Dpysl2 PE=1 SV=1 - [DPYL2_RAT]	115.97	44.58	1	15	17	40	4.36849e+07	572	62.2386	6.37939
Q6IFV3	Keratin, type I cytoskeletal 15 OS=Rattus norvegicus GN=Krt15 PE=1 SV=1 - [K1C15_RAT]	112.303	12.75	11	0	9	47	6.77926e+09	447	48.8401	4.85596
Q6IFV4	Keratin, type I cytoskeletal 13 OS=Rattus norvegicus GN=Krt13 PE=3 SV=1 - [K1C13_RAT]	90.3799	10.73	16	1	8	40	3.61139e+09	438	47.6993	4.90674
P11980	Pyruvate kinase PKM OS=Rattus norvegicus GN=Pkm PE=1 SV=3 - [KPYM_RAT]	82.0597	40.3	6	5	18	32	8.51467e+07	531	57.7809	7.06396
M0R4B8	Pyruvate kinase OS=Rattus norvegicus PE=3 SV=1 - [M0R4B8_RAT]	79.6216	39.84	5	2	15	29	5.55864e+07	487	52.8544	7.82568
P63018	Heat shock cognate 71 kDa protein OS=Rattus norvegicus GN=Hspa8 PE=1 SV=1 - [HSP7C_RAT]	62.8738	18.42	10	10	12	25	3.10125e+07	646	70.8272	5.51611
Q10758	Keratin, type II cytoskeletal 8 OS=Rattus norvegicus GN=Krt8 PE=1 SV=3 - [K2C8_RAT]	62.6919	14.7	5	2	9	31	2.23312e+09	483	53.9853	5.99854
Q07936	Annexin A2 OS=Rattus norvegicus GN=Anxa2 PE=1 SV=2 - [ANXA2_RAT]	61.5201	31.86	1	10	10	20	4.32357e+07	339	38.6538	7.69385
P09117	Fructose-bisphosphate aldolase C OS=Rattus norvegicus GN=Aldoc PE=1 SV=3 - [ALDOC_RAT]	61.4184	32.23	4	9	10	19	1.92676e+07	363	39.2592	7.12256
P68035	Actin, alpha cardiac muscle 1 OS=Rattus norvegicus GN=Actc1 PE=2 SV=1 - [ACTC_RAT]	61.3844	27.06	7	1	9	24	2.2551e+08	377	41.9919	5.38916
P05065	Fructose-bisphosphate aldolase A OS=Rattus norvegicus GN=Aldoa PE=1 SV=2 - [ALDOA_RAT]	61.3289	38.46	4	10	11	22	4.05991e+07	364	39.3273	8.08936
P63102	14-3-3 protein zeta/delta OS=Rattus norvegicus GN=Ywhaz PE=1 SV=1 - [1433Z_RAT]	58.0831	37.96	1	5	7	16	2.90925e+07	245	27.7537	4.79248
Q6IG04	Keratin, type II cytoskeletal 72 OS=Rattus norvegicus GN=Krt72 PE=3 SV=2 - [K2C72_RAT]	55.4613	8.08	1	1	6	27	1.81716e+09	520	56.8159	7.35693
P13221	Aspartate aminotransferase, cytoplasmic OS=Rattus norvegicus GN=Got1 PE=1 SV=3 - [AATC_RAT]	55.4147	24.94	1	9	9	19	6.99231e+07	413	46.3995	7.21045
P07323	Gamma-enolase OS=Rattus norvegicus GN=Eno2 PE=1 SV=2 - [ENOG_RAT]	55.152	31.8	1	8	9	17	5.6153e+07	434	47.1109	5.16064
Q6IFZ5	Protein Krt76 OS=Rattus norvegicus GN=Krt76 PE=2 SV=1 - [Q6IFZ5_RAT]	53.3939	8.26	3	1	8	30	2.58258e+09	581	61.7205	8.38232
P53534	Glycogen phosphorylase, brain form (Fragment) OS=Rattus norvegicus GN=Pygb PE=1 SV=3 - [PYGB_RAT]	51.2497	17.18	5	8	13	20	3.43759e+07	838	96.1131	6.68311
Q6IG02	Keratin, type II cytoskeletal 2 epidermal OS=Rattus norvegicus GN=Krt2 PE=3 SV=1 - [K22E_RAT]	51.175	10.07	4	4	9	24	1.71023e+09	685	69.0852	7.69385
P62260	14-3-3 protein epsilon OS=Rattus norvegicus GN=Ywhae PE=1 SV=1 - [1433E_RAT]	50.1887	39.22	1	7	9	18	2.59156e+07	255	29.1554	4.7417
D3ZGY4	Glyceraldehyde-3-phosphate dehydrogenase OS=Rattus norvegicus GN=Gapdh-ps2 PE=3 SV=1 - [D3ZGY4_RAT]	50.1524	35.14	28	7	7	17	7.06271e+07	333	35.8001	7.76709
M0R5J4	Uncharacterized protein OS=Rattus norvegicus PE=3 SV=1 - [M0R5J4_RAT]	48.609	24.88	9	7	8	14	3.89896e+07	434	47.0452	6.3667
Q9JKB7	Guanine deaminase OS=Rattus norvegicus GN=Gda PE=2 SV=1 - [Q9JKB7_RAT]	45.766	26.65	2	12	12	18	1.68496e+07	454	50.8687	5.71924
B2GV79	Pdxp protein OS=Rattus norvegicus GN=Pdxp PE=2 SV=1 - [B2GV79_RAT]	43.8057	27.05	3	6	6	15	8.29631e+06	292	31.404	5.5415
P48500	Triosephosphate isomerase OS=Rattus norvegicus GN=Tpi1 PE=1 SV=2 - [TPIS_RAT]	42.7752	51.81	4	8	8	14	1.05621e+07	249	26.8318	7.23975
P50398	Rab GDP dissociation inhibitor alpha OS=Rattus norvegicus GN=Gdi1 PE=1 SV=1 - [GDIA_RAT]	40.3649	22.37	2	6	7	12	7.49894e+06	447	50.5042	5.13525
G3V712	Keratin complex 2, basic, gene 7, isoform CRA_a OS=Rattus norvegicus GN=Krt7 PE=3 SV=1 - [G3V712_RAT]	40.0604	6.13	3	1	5	22	1.52166e+09	457	50.7751	5.87158
P06761	78 kDa glucose-regulated protein OS=Rattus norvegicus GN=Hspa5 PE=1 SV=1 - [GRP78_RAT]	39.7592	13.91	1	5	7	12	9.03492e+06	654	72.3024	5.16064
P82995	Heat shock protein HSP 90-alpha OS=Rattus norvegicus GN=Hsp90aa1 PE=1 SV=3 - [HS90A_RAT]	37.5923	16.37	10	5	11	15	4.21796e+07	733	84.7618	5.0083
D3ZY51	Plakophilin 1 (Predicted) OS=Rattus norvegicus GN=Pkp1 PE=4 SV=2 - [D3ZY51_RAT]	36.4281	21.49	2	10	10	15	1.62493e+07	605	67.1746	8.70459
P46462	Transitional endoplasmic reticulum ATPase OS=Rattus norvegicus GN=Vcp PE=1 SV=3 - [TERA_RAT]	31.9267	14.76	1	10	10	14	8.47289e+06	806	89.2927	5.26221
Q9QYU4	Ketimine reductase mu-crystallin OS=Rattus norvegicus GN=Crym PE=1 SV=1 - [CRYM_RAT]	31.47	16.93	2	5	5	11	1.11336e+07	313	33.5331	5.52881
P05197	Elongation factor 2 OS=Rattus norvegicus GN=Eef2 PE=1 SV=4 - [EF2_RAT]	31.4066	12.82	2	9	9	12	4.74636e+06	858	95.2229	6.82959
P34058	Heat shock protein HSP 90-beta OS=Rattus norvegicus GN=Hsp90ab1 PE=1 SV=4 - [HS90B_RAT]	31.12	14.36	10	4	10	13	3.93578e+07	724	83.2291	5.03369
Q62952	Dihydropyrimidinase-related protein 3 OS=Rattus norvegicus GN=Dpysl3 PE=1 SV=2 - [DPYL3_RAT]	29.2742	13.33	1	4	5	9	5.36156e+06	570	61.928	6.49365
P68255	14-3-3 protein theta OS=Rattus norvegicus GN=Ywhaq PE=1 SV=1 - [1433T_RAT]	28.711	28.98	2	3	6	9	4.32414e+07	245	27.7608	4.77979
F1M9V7	Protein Npepps OS=Rattus norvegicus GN=Npepps PE=4 SV=1 - [F1M9V7_RAT]	28.6879	11.2	3	10	10	12	7.25815e+06	920	103.279	5.77002
M0R757	Elongation factor 1-alpha OS=Rattus norvegicus GN=LOC100360413 PE=3 SV=1 - [M0R757_RAT]	28.5445	14.72	8	7	7	12	5.41475e+07	462	50.0761	9.01221
O35095	Neurochondrin OS=Rattus norvegicus GN=Ncdn PE=1 SV=2 - [NCDN_RAT]	28.3902	11.39	1	7	7	10	5.38363e+06	729	78.8727	5.61768
Q6AY84	Secernin-1 OS=Rattus norvegicus GN=Scrn1 PE=1 SV=1 - [SCRN1_RAT]	28.3075	12.32	1	3	3	9	5.96662e+06	414	46.3666	4.84326
P61983	14-3-3 protein gamma OS=Rattus norvegicus GN=Ywhag PE=1 SV=2 - [1433G_RAT]	27.443	20.24	1	2	5	10	4.47951e+07	247	28.2849	4.89404
P42123	L-lactate dehydrogenase B chain OS=Rattus norvegicus GN=Ldhb PE=1 SV=2 - [LDHB_RAT]	26.8688	25.45	3	6	8	10	4.0166e+07	334	36.5891	6.04932
F1M6F6	Protein Asap2 (Fragment) OS=Rattus norvegicus GN=Asap2 PE=4 SV=2 - [F1M6F6_RAT]	26.598	0.87	3	1	1	12	8.3591e+09	922	102.694	6.68311
P04642	L-lactate dehydrogenase A chain OS=Rattus norvegicus GN=Ldha PE=1 SV=1 - [LDHA_RAT]	25.4311	21.08	9	5	7	10	4.30596e+07	332	36.4273	8.26514
P35213	14-3-3 protein beta/alpha OS=Rattus norvegicus GN=Ywhab PE=1 SV=3 - [1433B_RAT]	25.395	18.29	1	1	4	8	4.32414e+07	246	28.0368	4.88135
P19804	Nucleoside diphosphate kinase B OS=Rattus norvegicus GN=Nme2 PE=1 SV=1 - [NDKB_RAT]	24.7749	40.79	4	5	5	12	1.96847e+07	152	17.2719	7.44482
O55096	Dipeptidyl peptidase 3 OS=Rattus norvegicus GN=Dpp3 PE=1 SV=2 - [DPP3_RAT]	24.7522	6.1	1	2	2	6	2.53215e+06	738	82.9869	5.22412
P61765	Syntaxin-binding protein 1 OS=Rattus norvegicus GN=Stxbp1 PE=1 SV=1 - [STXB1_RAT]	24.6423	8.25	1	5	5	9	1.28524e+07	594	67.5259	6.96143
P47858	ATP-dependent 6-phosphofructokinase, muscle type OS=Rattus norvegicus GN=Pfkm PE=2 SV=3 - [PFKAM_RAT]	24.3895	9.62	2	6	7	9	7.46004e+06	780	85.5057	8.00146
B1WBU9	Alpha-1,4 glucan phosphorylase OS=Rattus norvegicus GN=Pygm PE=2 SV=1 - [B1WBU9_RAT]	24.3315	11.64	5	5	10	11	2.13571e+07	842	97.2607	7.10791
P17220	Proteasome subunit alpha type-2 OS=Rattus norvegicus GN=Psma2 PE=1 SV=3 - [PSA2_RAT]	24.2933	36.75	2	5	5	8	3.78426e+06	234	25.9103	7.43018
G3V6D3	ATP synthase subunit beta OS=Rattus norvegicus GN=Atp5b PE=3 SV=1 - [G3V6D3_RAT]	24.1022	12.29	3	5	5	9	5.30493e+06	529	56.3095	5.2749
Q5U300	Ubiquitin-like modifier-activating enzyme 1 OS=Rattus norvegicus GN=Uba1 PE=1 SV=1 - [UBA1_RAT]	23.9752	7.94	4	6	6	8	6.6522e+06	1058	117.713	5.56689
P10860	Glutamate dehydrogenase 1, mitochondrial OS=Rattus norvegicus GN=Glud1 PE=1 SV=2 - [DHE3_RAT]	23.9233	14.16	3	6	6	9	6.04282e+06	558	61.3773	8.00146
Q62950	Dihydropyrimidinase-related protein 1 OS=Rattus norvegicus GN=Crmp1 PE=1 SV=1 - [DPYL1_RAT]	22.8194	6.82	1	1	3	6	1.18551e+07	572	62.1566	7.12256
P08009	Glutathione S-transferase Yb-3 OS=Rattus norvegicus GN=Gstm3 PE=1 SV=2 - [GSTM4_RAT]	21.105	19.27	11	2	4	9	1.329e+07	218	25.664	7.32764
O88989	Malate dehydrogenase, cytoplasmic OS=Rattus norvegicus GN=Mdh1 PE=1 SV=3 - [MDHC_RAT]	20.8744	14.07	1	5	5	8	1.59407e+07	334	36.46	6.58057
P70645	Bleomycin hydrolase OS=Rattus norvegicus GN=Blmh PE=1 SV=1 - [BLMH_RAT]	20.5291	8.15	3	4	4	9	7.02761e+06	454	52.2888	6.48096
P60901	Proteasome subunit alpha type-6 OS=Rattus norvegicus GN=Psma6 PE=1 SV=1 - [PSA6_RAT]	20.247	21.54	1	4	4	8	9.61842e+06	246	27.3818	6.75635
Q5I0G4	Glycine--tRNA ligase (Fragment) OS=Rattus norvegicus GN=Gars PE=1 SV=1 - [SYG_RAT]	20.0168	8.95	2	4	4	7	5.88262e+06	637	71.9843	6.07471
F1LMW7	Myristoylated alanine-rich C-kinase substrate OS=Rattus norvegicus GN=Marcks PE=4 SV=2 - [F1LMW7_RAT]	19.9956	17.86	2	2	2	6	4.20834e+06	308	29.8709	4.36084
P68511	14-3-3 protein eta OS=Rattus norvegicus GN=Ywhah PE=1 SV=2 - [1433F_RAT]	19.3911	20.33	1	2	5	8	4.32414e+07	246	28.194	4.89404
P35704	Peroxiredoxin-2 OS=Rattus norvegicus GN=Prdx2 PE=1 SV=3 - [PRDX2_RAT]	19.289	21.72	1	4	4	7	5.27241e+07	198	21.7701	5.59229
Q71DI1	Dermcidin OS=Rattus norvegicus PE=2 SV=1 - [Q71DI1_RAT]	18.1583	35.45	1	3	3	6	4.40301e+07	110	11.2768	6.53662
D4ABT0	Guanine nucleotide-binding protein G(o) subunit alpha OS=Rattus norvegicus GN=Gnao1 PE=4 SV=2 - [D4ABT0_RAT]	17.902	15.25	18	5	5	8	1.36072e+07	354	39.995	6.01123
F1LRV4	Heat shock 70 kDa protein 4 OS=Rattus norvegicus GN=Hspa4 PE=3 SV=1 - [F1LRV4_RAT]	17.8701	6.31	2	4	4	6	2.37929e+06	840	93.9671	5.21143
Q6IFW7	Protein Krt28 OS=Rattus norvegicus GN=Krt28 PE=2 SV=1 - [Q6IFW7_RAT]	17.5292	4.96	7	1	2	10	3.3577e+09	383	41.2996	5.50342
G3V7Q6	Proteasome subunit beta type OS=Rattus norvegicus GN=Psmb5 PE=3 SV=1 - [G3V7Q6_RAT]	17.125	18.63	2	5	5	6	7.84827e+06	263	28.5412	7.02002
P50399	Rab GDP dissociation inhibitor beta OS=Rattus norvegicus GN=Gdi2 PE=1 SV=2 - [GDIB_RAT]	16.9608	12.36	1	3	4	6	2.7677e+06	445	50.5047	6.25244
P30835	ATP-dependent 6-phosphofructokinase, liver type OS=Rattus norvegicus GN=Pfkl PE=2 SV=3 - [PFKAL_RAT]	16.9035	6.03	2	3	4	7	2.5714e+06	780	85.2844	7.40088
Q71SY3	Translin OS=Rattus norvegicus GN=Tsn PE=2 SV=1 - [Q71SY3_RAT]	16.9031	23.25	4	5	5	7	7.07057e+06	228	26.1547	6.44287
P21213	Histidine ammonia-lyase OS=Rattus norvegicus GN=Hal PE=1 SV=1 - [HUTH_RAT]	16.671	11.42	1	6	6	7	6.22123e+06	657	72.2385	6.50732
F1M978	Inositol monophosphatase 1 OS=Rattus norvegicus GN=Impa1 PE=4 SV=1 - [F1M978_RAT]	16.4086	15.16	2	4	4	6	1.59407e+07	277	30.4754	5.2876
P80254	D-dopachrome decarboxylase OS=Rattus norvegicus GN=Ddt PE=1 SV=3 - [DOPD_RAT]	16.3805	58.47	1	5	5	7	2.06976e+07	118	13.1248	6.53662
Q9JLJ3	4-trimethylaminobutyraldehyde dehydrogenase OS=Rattus norvegicus GN=Aldh9a1 PE=1 SV=1 - [AL9A1_RAT]	16.3754	9.31	1	4	4	6	9.20496e+06	494	53.618	6.91748
P31044	Phosphatidylethanolamine-binding protein 1 OS=Rattus norvegicus GN=Pebp1 PE=1 SV=3 - [PEBP1_RAT]	15.9988	25.13	1	3	3	4	1.20005e+07	187	20.7884	5.79541
P07150	Annexin A1 OS=Rattus norvegicus GN=Anxa1 PE=1 SV=2 - [ANXA1_RAT]	15.9332	14.16	1	4	4	5	3.03175e+06	346	38.8049	7.34229
P0CG51	Polyubiquitin-B OS=Rattus norvegicus GN=Ubb PE=1 SV=1 - [UBB_RAT]	15.6485	56.39	12	4	4	6	4.63782e+07	305	34.3475	7.53271
F1LQQ1	Malic enzyme (Fragment) OS=Rattus norvegicus GN=Me1 PE=3 SV=2 - [F1LQQ1_RAT]	15.5404	3.28	2	1	1	4	2.66893e+06	549	61.0735	5.92236
G3V9A3	Protein Sfn OS=Rattus norvegicus GN=Sfn PE=3 SV=1 - [G3V9A3_RAT]	15.4243	14.92	3	1	4	7	4.32414e+07	248	27.7297	4.77979
Q7TPB1	T-complex protein 1 subunit delta OS=Rattus norvegicus GN=Cct4 PE=1 SV=3 - [TCPD_RAT]	13.5231	10.39	1	4	4	5	2.28106e+06	539	58.0628	8.01611
F1LSQ6	Proteasome subunit alpha type OS=Rattus norvegicus GN=Psma7 PE=3 SV=1 - [F1LSQ6_RAT]	13.4355	22.05	4	4	4	6	8.57734e+06	254	28.3809	8.45557
P16617	Phosphoglycerate kinase 1 OS=Rattus norvegicus GN=Pgk1 PE=1 SV=2 - [PGK1_RAT]	13.1081	17.51	4	6	6	9	6.58781e+06	417	44.51	7.89893
P02688	Myelin basic protein OS=Rattus norvegicus GN=Mbp PE=1 SV=3 - [MBP_RAT]	12.9848	14.36	3	3	3	6	2.51676e+07	195	21.489	11.2388
A0A0A0MY51	Dynamin-1 OS=Rattus norvegicus GN=Dnm1 PE=4 SV=1 - [A0A0A0MY51_RAT]	12.9593	8.23	12	7	7	8	5.09034e+06	814	92.4274	6.93213
D4ACB8	Chaperonin subunit 8 (Theta) (Predicted), isoform CRA_a OS=Rattus norvegicus GN=Cct8 PE=3 SV=1 - [D4ACB8_RAT]	12.9033	6.2	1	3	3	6	2.61714e+06	548	59.5505	5.5415
P62815	V-type proton ATPase subunit B, brain isoform OS=Rattus norvegicus GN=Atp6v1b2 PE=1 SV=1 - [VATB2_RAT]	12.7647	5.09	1	2	2	4	1.83784e+06	511	56.5149	5.80811
Q91ZN1	Coronin-1A OS=Rattus norvegicus GN=Coro1a PE=1 SV=3 - [COR1A_RAT]	12.6066	5.64	1	2	2	4	4.02039e+06	461	51.033	6.48096
P05370	Glucose-6-phosphate 1-dehydrogenase OS=Rattus norvegicus GN=G6pdx PE=1 SV=3 - [G6PD_RAT]	12.5741	7.96	1	4	4	6	3.28669e+06	515	59.3378	6.37939
P23606	Protein-glutamine gamma-glutamyltransferase K OS=Rattus norvegicus GN=Tgm1 PE=2 SV=1 - [TGM1_RAT]	12.5304	4.25	1	3	3	5	7.13805e+06	824	90.7129	6.46826
F1LVT6	Protein Senp1 (Fragment) OS=Rattus norvegicus GN=Senp1 PE=4 SV=1 - [F1LVT6_RAT]	12.3476	3.28	1	1	1	4	1.0167e+07	640	72.2113	8.20654
P09606	Glutamine synthetase OS=Rattus norvegicus GN=Glul PE=1 SV=3 - [GLNA_RAT]	12.3033	12.06	1	3	3	4	4.74567e+06	373	42.2403	7.07861
P52296	Importin subunit beta-1 OS=Rattus norvegicus GN=Kpnb1 PE=1 SV=1 - [IMB1_RAT]	12.1213	1.71	2	1	1	3	1.69508e+06	875	97.062	4.76709
Q05175	Brain acid soluble protein 1 OS=Rattus norvegicus GN=Basp1 PE=1 SV=2 - [BASP1_RAT]	12.0512	27.27	1	2	2	3	3.52928e+06	220	21.7774	4.51318
P85845	Fascin OS=Rattus norvegicus GN=Fscn1 PE=1 SV=2 - [FSCN1_RAT]	11.9459	11.97	1	5	5	7	9.04428e+06	493	54.4569	6.7417
P05708	Hexokinase-1 OS=Rattus norvegicus GN=Hk1 PE=1 SV=4 - [HXK1_RAT]	11.9141	4.58	2	4	4	6	4.30248e+06	918	102.342	6.7124
D3ZQ45	Protein Dsg1 OS=Rattus norvegicus GN=Dsg1 PE=4 SV=1 - [D3ZQ45_RAT]	11.9119	4.16	3	4	4	6	2.25006e+07	914	100.735	4.83057
O08651	D-3-phosphoglycerate dehydrogenase OS=Rattus norvegicus GN=Phgdh PE=1 SV=3 - [SERA_RAT]	11.7811	10.13	3	5	5	5	9.84313e+06	533	56.4572	6.7124
P00762	Anionic trypsin-1 OS=Rattus norvegicus GN=Prss1 PE=1 SV=1 - [TRY1_RAT]	11.65	8.13	1	1	1	3	5.385e+08	246	25.9427	4.89404
Q6P502	T-complex protein 1 subunit gamma OS=Rattus norvegicus GN=Cct3 PE=1 SV=1 - [TCPG_RAT]	11.3748	7.89	2	4	4	5	6.07133e+06	545	60.6084	6.63916
P45592	Cofilin-1 OS=Rattus norvegicus GN=Cfl1 PE=1 SV=3 - [COF1_RAT]	11.3301	15.06	2	2	2	4	3.4687e+06	166	18.5207	8.08936
Q6LDP3	Rat glutathione S-transferase OS=Rattus norvegicus GN=Gstm1 PE=2 SV=1 - [Q6LDP3_RAT]	11.3144	14.81	7	1	3	5	1.05577e+07	216	25.669	8.19189
Q63716	Peroxiredoxin-1 OS=Rattus norvegicus GN=Prdx1 PE=1 SV=1 - [PRDX1_RAT]	11.1829	23.62	2	5	5	5	2.07133e+07	199	22.0953	8.1333
D4ABS2	Dynamin-1-like protein (Fragment) OS=Rattus norvegicus GN=Dnm1l PE=3 SV=2 - [D4ABS2_RAT]	11.1749	6.72	2	3	3	4	1.41231e+06	685	76.7304	7.88428
Q6P6V0	Glucose-6-phosphate isomerase OS=Rattus norvegicus GN=Gpi PE=1 SV=1 - [G6PI_RAT]	11.1686	9.68	1	5	5	8	1.52679e+07	558	62.7871	7.76709
D3ZEN5	Peroxiredoxin-5, mitochondrial (Fragment) OS=Rattus norvegicus GN=Prdx5 PE=4 SV=2 - [D3ZEN5_RAT]	10.9549	29.19	2	3	3	4	1.67495e+06	161	16.9149	7.23975
Q05546	Tenascin-R OS=Rattus norvegicus GN=Tnr PE=1 SV=1 - [TENR_RAT]	10.8795	2.8	3	3	3	4	2.73274e+06	1356	149.277	4.91943
Q3KRD8	Eukaryotic translation initiation factor 6 OS=Rattus norvegicus GN=Eif6 PE=2 SV=1 - [IF6_RAT]	10.8754	14.29	1	2	2	3	2.1008e+06	245	26.5542	4.7417
P04762	Catalase OS=Rattus norvegicus GN=Cat PE=1 SV=3 - [CATA_RAT]	10.8437	8.35	1	3	3	4	5.48904e+06	527	59.7195	7.50342
D3ZAR3	Protein LOC102550890 OS=Rattus norvegicus GN=LOC100361349 PE=4 SV=2 - [D3ZAR3_RAT]	10.585	38.27	5	2	2	4	2.08669e+07	81	8.84902	8.14795
B2RYG6	Ubiquitin thioesterase OTUB1 OS=Rattus norvegicus GN=Otub1 PE=1 SV=1 - [OTUB1_RAT]	10.4196	12.55	1	3	3	4	4.0602e+06	271	31.2504	4.94482
Q6IMF1	Keratin, type II cytoskeletal 80 OS=Rattus norvegicus GN=Krt80 PE=3 SV=1 - [K2C80_RAT]	10.3796	6.64	1	3	3	4	1.31489e+07	452	50.5188	6.20166
F8WG67	Acyl-CoA thioesterase 7, isoform CRA_a OS=Rattus norvegicus GN=Acot7 PE=4 SV=2 - [F8WG67_RAT]	10.3124	12.9	2	4	4	4	1.26357e+07	372	40.942	7.73779
D4A133	Protein Atp6v1a OS=Rattus norvegicus GN=Atp6v1a PE=3 SV=1 - [D4A133_RAT]	10.1501	4.7	2	2	2	4	1.80365e+07	617	68.2216	5.57959
D3ZWE3	Premature ovarian failure 1B (Predicted) OS=Rattus norvegicus GN=Pof1b PE=4 SV=2 - [D3ZWE3_RAT]	10.1013	8.18	1	4	4	4	3.0825e+06	587	67.6174	6.27783
M0RDJ4	Glia maturation factor beta OS=Rattus norvegicus GN=Gmfb PE=4 SV=1 - [M0RDJ4_RAT]	10.0344	16.2	2	1	1	3	2.68388e+06	142	16.7395	5.43994
G3V6S2	Aconitate hydratase OS=Rattus norvegicus GN=Aco1 PE=3 SV=1 - [G3V6S2_RAT]	9.9244	3.49	2	2	2	3	1.24747e+06	889	98.1304	7.38623
P50137	Transketolase OS=Rattus norvegicus GN=Tkt PE=1 SV=1 - [TKT_RAT]	9.81562	5.3	3	2	2	3	1.55941e+06	623	67.6006	7.48877
P02091	Hemoglobin subunit beta-1 OS=Rattus norvegicus GN=Hbb PE=1 SV=3 - [HBB1_RAT]	9.73095	12.93	9	2	2	4	1.16516e+07	147	15.9692	8.07471
Q62703	Reticulocalbin-2 OS=Rattus norvegicus GN=Rcn2 PE=1 SV=2 - [RCN2_RAT]	9.72999	13.13	1	2	2	2	1.99611e+06	320	37.4099	4.41162
A0A096MJR9	Protein LOC100911610 (Fragment) OS=Rattus norvegicus GN=LOC100911610 PE=4 SV=1 - [A0A096MJR9_RAT]	9.59677	8.18	4	2	2	3	4.60025e+06	477	52.1796	7.41553
B2RYG0	Coronin OS=Rattus norvegicus GN=Coro1c PE=2 SV=1 - [B2RYG0_RAT]	9.51112	8.08	2	2	2	3	2.75972e+06	334	37.3917	7.02002
E9PSI7	Alpha-amylase OS=Rattus norvegicus GN=Amy2a3 PE=3 SV=2 - [E9PSI7_RAT]	9.24171	6.1	7	2	2	4	1.22102e+07	508	57.1298	7.79639
P13676	Acylamino-acid-releasing enzyme OS=Rattus norvegicus GN=Apeh PE=1 SV=1 - [ACPH_RAT]	9.20858	6.83	2	4	4	4	3.01051e+06	732	81.3314	5.73193
P54311	Guanine nucleotide-binding protein G(I)/G(S)/G(T) subunit beta-1 OS=Rattus norvegicus GN=Gnb1 PE=1 SV=4 - [GBB1_RAT]	8.99558	7.35	2	2	2	5	8.09848e+06	340	37.353	5.99854
Q63942	GTP-binding protein Rab-3D OS=Rattus norvegicus GN=Rab3d PE=1 SV=2 - [RAB3D_RAT]	8.71527	22.37	32	3	4	4	9.60503e+06	219	24.2748	4.91943
Q8VBU2	Protein NDRG2 OS=Rattus norvegicus GN=Ndrg2 PE=1 SV=1 - [NDRG2_RAT]	8.68272	3.77	1	1	1	3	1.90035e+07	371	40.7531	5.30029
P18422	Proteasome subunit alpha type-3 OS=Rattus norvegicus GN=Psma3 PE=1 SV=3 - [PSA3_RAT]	8.62087	17.65	2	4	4	5	5.63594e+06	255	28.4011	5.43994
B2RYQ2	Serine/threonine-protein phosphatase 2A activator OS=Rattus norvegicus GN=Ppp2r4 PE=2 SV=1 - [B2RYQ2_RAT]	8.55167	7.12	1	2	2	3	1.9574e+06	323	36.5937	6.29053
P35559	Insulin-degrading enzyme OS=Rattus norvegicus GN=Ide PE=1 SV=1 - [IDE_RAT]	8.08535	3.73	1	4	4	4	2.92472e+06	1019	117.635	6.60986
A0A0A0MXY5	ATP-dependent 6-phosphofructokinase, platelet type OS=Rattus norvegicus GN=Pfkp PE=4 SV=1 - [A0A0A0MXY5_RAT]	8.03384	4.33	2	3	3	4	3.04828e+06	786	85.3871	7.15186
Q9R170	Branched-chain-amino-acid aminotransferase (Fragment) OS=Rattus norvegicus GN=Bcat1 PE=2 SV=1 - [Q9R170_RAT]	7.9918	3.87	3	1	1	2	1.96068e+06	362	40.7959	7.41553
P07824	Arginase-1 OS=Rattus norvegicus GN=Arg1 PE=1 SV=2 - [ARGI1_RAT]	7.84302	5.88	1	2	2	4	1.24798e+07	323	34.9513	7.25439
Q4V8H5	Aspartyl aminopeptidase OS=Rattus norvegicus GN=Dnpep PE=2 SV=1 - [Q4V8H5_RAT]	7.75549	4.63	1	2	2	3	3.38294e+06	475	52.5219	7.25439
M0RDM4	Histone H2A OS=Rattus norvegicus GN=LOC680322 PE=3 SV=1 - [M0RDM4_RAT]	7.74223	27.34	20	3	3	3	8.43898e+06	128	14.0599	11.0337
A0A0A6YYD8	Uncharacterized protein (Fragment) OS=Rattus norvegicus PE=4 SV=1 - [A0A0A6YYD8_RAT]	7.71588	10.06	6	2	2	3	5.84506e+06	179	20.3446	6.80029
Q5GFD9	Protein IMPACT OS=Rattus norvegicus GN=Impact PE=2 SV=1 - [IMPCT_RAT]	7.4674	11.04	1	3	3	4	2.34368e+06	317	35.9722	5.16064
B4F7A3	Galectin OS=Rattus norvegicus GN=Lgalsl PE=2 SV=1 - [B4F7A3_RAT]	7.33061	17.44	1	2	2	3	1.76144e+06	172	18.9436	5.35107
P85971	6-phosphogluconolactonase OS=Rattus norvegicus GN=Pgls PE=1 SV=1 - [6PGL_RAT]	7.31895	6.23	2	1	1	2	2.94408e+06	257	27.2173	5.84619
D3ZKA0	Protein Serpinb13 OS=Rattus norvegicus GN=Serpinb13 PE=3 SV=1 - [D3ZKA0_RAT]	7.19233	3.08	1	1	1	2	3.63975e+07	389	44.2215	5.92236
D3ZXK9	Purine nucleoside phosphorylase (Fragment) OS=Rattus norvegicus GN=Pnp PE=4 SV=2 - [D3ZXK9_RAT]	6.94402	10.07	2	3	3	3	3.99564e+06	288	32.1441	7.82568
P62963	Profilin-1 OS=Rattus norvegicus GN=Pfn1 PE=1 SV=2 - [PROF1_RAT]	6.94073	21.43	1	2	2	2	1.78478e+06	140	14.9475	8.27979
P97536	Cullin-associated NEDD8-dissociated protein 1 OS=Rattus norvegicus GN=Cand1 PE=1 SV=1 - [CAND1_RAT]	6.84297	3.33	1	4	4	4	2.28714e+06	1230	136.275	5.78271
G3V774	F-box only protein 2 OS=Rattus norvegicus GN=Fbxo2 PE=4 SV=1 - [G3V774_RAT]	6.84003	10.47	2	2	2	3	6.2567e+06	296	33.6519	4.33545
O35244	Peroxiredoxin-6 OS=Rattus norvegicus GN=Prdx6 PE=1 SV=3 - [PRDX6_RAT]	6.81945	14.29	1	3	3	3	6.99314e+06	224	24.803	5.93506
A2RUW1	Toll-interacting protein OS=Rattus norvegicus GN=Tollip PE=2 SV=1 - [TOLIP_RAT]	6.8169	10.95	1	2	2	2	1.71635e+06	274	30.2949	5.17334
Q499Q4	Phosphoglucomutase 1 OS=Rattus norvegicus GN=Pgm1 PE=2 SV=2 - [Q499Q4_RAT]	6.7423	5.69	4	3	3	3	3.97767e+06	562	61.3516	6.56592
Q6GMN8	Actn1 protein OS=Rattus norvegicus GN=Actn1 PE=2 SV=1 - [Q6GMN8_RAT]	6.65739	2.48	6	2	2	2	1.95485e+06	887	102.547	5.47803
M0R8T2	10-formyltetrahydrofolate dehydrogenase OS=Rattus norvegicus GN=Aldh1l1 PE=1 SV=1 - [M0R8T2_RAT]	6.64627	2.33	2	2	2	3	2.60978e+06	902	98.4831	5.5415
P85970	Actin-related protein 2/3 complex subunit 2 OS=Rattus norvegicus GN=Arpc2 PE=1 SV=1 - [ARPC2_RAT]	6.61093	10.33	1	3	3	3	3.84237e+06	300	34.3695	7.35693
P47728	Calretinin OS=Rattus norvegicus GN=Calb2 PE=1 SV=1 - [CALB2_RAT]	6.56505	10.7	2	3	3	3	4.67316e+06	271	31.3845	5.021
P02770	Serum albumin OS=Rattus norvegicus GN=Alb PE=1 SV=2 - [ALBU_RAT]	6.5449	7.57	1	4	4	5	1.43303e+07	608	68.6861	6.48096
P55053	Fatty acid-binding protein, epidermal OS=Rattus norvegicus GN=Fabp5 PE=1 SV=3 - [FABP5_RAT]	6.46072	7.41	1	2	2	3	3.25643e+07	135	15.0495	7.18115
P21670	Proteasome subunit alpha type-4 OS=Rattus norvegicus GN=Psma4 PE=1 SV=1 - [PSA4_RAT]	6.43812	7.28	2	2	2	3	1.74447e+07	261	29.4792	7.72314
D3Z8J0	Protein RGD1564425 OS=Rattus norvegicus GN=RGD1564425 PE=4 SV=1 - [D3Z8J0_RAT]	6.32649	7.8	3	1	1	2	6.51081e+06	205	23.0305	6.18896
D3ZA32	Protein Gsdma OS=Rattus norvegicus GN=Gsdma PE=4 SV=1 - [D3ZA32_RAT]	6.30024	4.71	1	2	2	3	9.18449e+06	446	49.7829	5.41455
M0RD40	Protein Sik3 OS=Rattus norvegicus GN=Sik3 PE=1 SV=1 - [M0RD40_RAT]	6.24378	1.17	1	1	1	2	5.39955e+07	1366	150.569	7.00537
G3V7L8	ATPase, H+ transporting, V1 subunit E isoform 1, isoform CRA_a OS=Rattus norvegicus GN=Atp6v1e1 PE=3 SV=1 - [G3V7L8_RAT]	6.23365	10.18	3	3	3	3	1.60579e+06	226	26.1268	8.42627
Q64715	Microtubule-associated protein OS=Rattus norvegicus GN=Map2 PE=2 SV=1 - [Q64715_RAT]	6.17888	1.48	4	2	2	2	1.26708e+06	1825	198.446	4.84326
P62804	Histone H4 OS=Rattus norvegicus GN=Hist1h4b PE=1 SV=2 - [H4_RAT]	6.17499	31.07	1	3	3	3	5.7354e+06	103	11.3604	11.356
P46413	Glutathione synthetase OS=Rattus norvegicus GN=Gss PE=1 SV=1 - [GSHB_RAT]	6.09526	5.49	1	2	2	2	5.48569e+06	474	52.3119	5.66846
Q19LA7	Vesicle-associated membrane protein 2 (Fragment) OS=Rattus norvegicus PE=2 SV=1 - [Q19LA7_RAT]	6.09181	48.57	5	1	1	2	1.18107e+06	35	4.03711	9.31982
F1LV89	Protein Rap1gap OS=Rattus norvegicus GN=Rap1gap PE=4 SV=2 - [F1LV89_RAT]	5.98149	2.34	1	1	1	2	857327	727	80.5669	6.15088
P06687	Sodium/potassium-transporting ATPase subunit alpha-3 OS=Rattus norvegicus GN=Atp1a3 PE=1 SV=2 - [AT1A3_RAT]	5.89783	3.06	3	2	2	2	1.47799e+06	1013	111.62	5.41455
D3ZJF8	Protein Fcgbp OS=Rattus norvegicus GN=Fcgbp PE=4 SV=2 - [D3ZJF8_RAT]	5.89694	0.35	1	1	1	3	4.37273e+09	2582	274.806	5.09717
P00507	Aspartate aminotransferase, mitochondrial OS=Rattus norvegicus GN=Got2 PE=1 SV=2 - [AATM_RAT]	5.8398	6.05	1	2	2	2	2.10885e+06	430	47.2841	8.99756
O88767	Protein DJ-1 OS=Rattus norvegicus GN=Park7 PE=1 SV=1 - [PARK7_RAT]	5.80809	15.87	3	3	3	3	4.85283e+06	189	19.9614	6.771
P68182	cAMP-dependent protein kinase catalytic subunit beta OS=Rattus norvegicus GN=Prkacb PE=1 SV=2 - [KAPCB_RAT]	5.75989	5.98	5	2	2	2	5.57448e+06	351	40.682	8.55811
Q5FVH2	Phospholipase D3 OS=Rattus norvegicus GN=Pld3 PE=2 SV=1 - [PLD3_RAT]	5.68285	2.46	1	1	1	2	1.79269e+06	488	54.3644	6.52197
G3V7Y3	ATP synthase subunit delta, mitochondrial OS=Rattus norvegicus GN=Atp5d PE=3 SV=1 - [G3V7Y3_RAT]	5.67475	13.69	2	2	2	2	2.59192e+07	168	17.5522	5.23682
P25113	Phosphoglycerate mutase 1 OS=Rattus norvegicus GN=Pgam1 PE=1 SV=4 - [PGAM1_RAT]	5.6717	13.39	1	2	2	2	2.38561e+06	254	28.8139	7.18115
Q6S3A1	Plectin 4 OS=Rattus norvegicus PE=2 SV=1 - [Q6S3A1_RAT]	5.65872	0.85	13	3	3	4	1.80196e+06	4451	506.371	5.68115
P40307	Proteasome subunit beta type-2 OS=Rattus norvegicus GN=Psmb2 PE=1 SV=1 - [PSB2_RAT]	5.64518	11.44	1	2	2	2	7.91138e+06	201	22.8977	7.44482
Q5RKJ9	RAB10, member RAS oncogene family OS=Rattus norvegicus GN=Rab10 PE=2 SV=1 - [Q5RKJ9_RAT]	5.57861	11	25	1	2	2	5.27821e+06	200	22.5266	8.38232
P62716	Serine/threonine-protein phosphatase 2A catalytic subunit beta isoform OS=Rattus norvegicus GN=Ppp2cb PE=1 SV=1 - [PP2AB_RAT]	5.57719	3.56	2	1	1	2	3.15306e+06	309	35.5523	5.42725
Q9JHL4	Drebrin-like protein OS=Rattus norvegicus GN=Dbnl PE=1 SV=1 - [DBNL_RAT]	5.40593	2.52	1	1	1	2	2.02533e+06	436	48.5825	4.91943
F1MAS7	Protein Sdr9c7 OS=Rattus norvegicus GN=Sdr9c7 PE=3 SV=1 - [F1MAS7_RAT]	5.35815	7.35	2	2	2	2	3.0284e+06	313	35.0532	8.90967
D3ZVQ0	Ubiquitin carboxyl-terminal hydrolase OS=Rattus norvegicus GN=Usp5 PE=3 SV=1 - [D3ZVQ0_RAT]	5.3288	3.61	1	3	3	3	1.78648e+06	858	95.7183	5.0083
Q62789	UDP-glucuronosyltransferase 2B7 OS=Rattus norvegicus GN=Ugt2b7 PE=2 SV=1 - [UD2B7_RAT]	5.32217	3.58	1	1	1	2	3.22344e+07	530	60.05	8.26514
F1LTZ6	Protein RGD1559921 (Fragment) OS=Rattus norvegicus GN=RGD1559921 PE=4 SV=1 - [F1LTZ6_RAT]	5.30211	8.04	4	1	1	2	1.50045e+07	112	12.3281	6.771
D3ZT27	Protein RGD1565819 OS=Rattus norvegicus GN=Zfp831 PE=1 SV=2 - [D3ZT27_RAT]	5.27833	1.29	1	1	1	2	4.62476e+06	1548	164.841	7.54736
Q0QF43	Malate dehydrogenase (Fragment) OS=Rattus norvegicus GN=Mdh2 PE=2 SV=1 - [Q0QF43_RAT]	5.27556	7.97	2	2	2	2	1.79187e+06	301	31.6726	7.63525
D4ABS5	Uncharacterized protein OS=Rattus norvegicus GN=Pithd1 PE=4 SV=1 - [D4ABS5_RAT]	5.25443	4.09	1	1	1	2	2.14017e+06	220	25.1914	6.27783
Q64057	Alpha-aminoadipic semialdehyde dehydrogenase OS=Rattus norvegicus GN=Aldh7a1 PE=1 SV=2 - [AL7A1_RAT]	5.20514	2.6	1	1	1	2	1.36472e+06	539	58.7114	7.86963
F1LUM5	Protein Tubal3 OS=Rattus norvegicus GN=Tubal3 PE=3 SV=2 - [F1LUM5_RAT]	5.17175	6.28	1	1	2	2	9.03599e+06	382	42.8053	6.02393
Q3MIE4	Synaptic vesicle membrane protein VAT-1 homolog OS=Rattus norvegicus GN=Vat1 PE=1 SV=1 - [VAT1_RAT]	5.11927	3.71	1	1	1	2	2.35651e+06	404	43.091	6.62451
B2RYN0	Pgm3 protein OS=Rattus norvegicus GN=Pgm3 PE=2 SV=1 - [B2RYN0_RAT]	5.10859	4.8	2	2	2	2	2.62769e+06	542	59.6473	6.23975
B2RZ72	Actin related protein 2/3 complex, subunit 4 (Predicted), isoform CRA_a OS=Rattus norvegicus GN=Arpc4 PE=2 SV=1 - [B2RZ72_RAT]	5.07979	11.31	1	2	2	2	4.84323e+06	168	19.6543	8.42627
A0JN25	Microtubule-associated protein OS=Rattus norvegicus GN=Mapt PE=2 SV=1 - [A0JN25_RAT]	5.05889	2.92	9	1	1	2	5.41836e+06	343	35.8743	9.43701
Q91XL4	G-protein beta-2 subunit (Fragment) OS=Rattus norvegicus PE=2 SV=1 - [Q91XL4_RAT]	5.05742	5.33	3	1	1	2	7.89893e+06	225	24.4277	5.36377
D3ZQ18	Protein Nccrp1 OS=Rattus norvegicus GN=Nccrp1 PE=4 SV=1 - [D3ZQ18_RAT]	4.93643	7.22	1	2	2	2	7.22453e+06	291	32.9838	6.53662
O35264	Platelet-activating factor acetylhydrolase IB subunit beta OS=Rattus norvegicus GN=Pafah1b2 PE=1 SV=1 - [PA1B2_RAT]	4.92607	12.23	1	2	2	2	2.54364e+06	229	25.5652	5.92236
B2RYX0	Naca protein OS=Rattus norvegicus GN=Naca PE=2 SV=1 - [B2RYX0_RAT]	4.8223	6.51	2	1	1	2	2.77725e+06	215	23.3697	4.56396
M0RBW0	Protein Flg2 OS=Rattus norvegicus GN=Flg2 PE=4 SV=1 - [M0RBW0_RAT]	4.8205	8.11	1	2	2	4	2.20372e+06	259	29.9946	7.03467
Q1RP74	Protein LOC100911774 OS=Rattus norvegicus GN=LOC100911774 PE=2 SV=1 - [Q1RP74_RAT]	4.78889	6.56	2	1	1	1	4.15457e+06	244	27.2303	4.99561
P55051	Fatty acid-binding protein, brain OS=Rattus norvegicus GN=Fabp7 PE=1 SV=2 - [FABP7_RAT]	4.72803	20.45	1	2	2	3	1.60612e+07	132	14.8544	5.63037
P36972	Adenine phosphoribosyltransferase OS=Rattus norvegicus GN=Aprt PE=1 SV=1 - [APT_RAT]	4.72547	12.78	1	2	2	2	1.57006e+06	180	19.5334	6.56592
P62161	Calmodulin OS=Rattus norvegicus GN=Calm1 PE=1 SV=2 - [CALM_RAT]	4.67573	16.78	2	2	2	2	1.07472e+07	149	16.8268	4.22119
Q5XI34	Protein Ppp2r1a OS=Rattus norvegicus GN=Ppp2r1a PE=2 SV=1 - [Q5XI34_RAT]	4.64985	6.79	2	3	3	4	6.40442e+06	589	65.2809	5.10986
O54783	Choline/ethanolamine kinase OS=Rattus norvegicus GN=Chkb PE=1 SV=3 - [CHKB_RAT]	4.61109	5.58	1	2	2	3	1.51161e+06	394	45.0714	5.32568
P09527	Ras-related protein Rab-7a OS=Rattus norvegicus GN=Rab7a PE=1 SV=2 - [RAB7A_RAT]	4.54119	10.14	1	2	2	2	1.34302e+06	207	23.4889	6.69775
D3ZC55	Heat shock 70kDa protein 12A (Predicted), isoform CRA_a OS=Rattus norvegicus GN=Hspa12a PE=4 SV=1 - [D3ZC55_RAT]	4.53462	3.85	1	2	2	2	3.59046e+06	675	74.7835	6.60986
G3V9A5	Keratinocyte proline-rich protein OS=Rattus norvegicus GN=Kprp PE=4 SV=1 - [G3V9A5_RAT]	4.50707	1.43	2	1	1	2	4.88038e+07	699	76.3621	8.38232
Q4KLN8	E3 ubiquitin-protein ligase RNF8 OS=Rattus norvegicus GN=Rnf8 PE=2 SV=1 - [RNF8_RAT]	4.5013	1.44	1	1	1	2	9.26543e+07	487	55.5794	8.07471
P34064	Proteasome subunit alpha type-5 OS=Rattus norvegicus GN=Psma5 PE=2 SV=1 - [PSA5_RAT]	4.39975	12.03	2	2	2	4	1.46674e+07	241	26.3742	4.85596
Q6TXF7	LRRGT00042 OS=Rattus norvegicus PE=2 SV=1 - [Q6TXF7_RAT]	4.34644	4.07	1	1	1	2	1.23264e+07	369	40.8562	7.28369
P18421	Proteasome subunit beta type-1 OS=Rattus norvegicus GN=Psmb1 PE=1 SV=3 - [PSB1_RAT]	4.341	7.92	2	2	2	3	1.39775e+07	240	26.4623	7.35693
Q4QQV4	Dead end homolog 1 (Zebrafish) OS=Rattus norvegicus GN=Hars PE=2 SV=1 - [Q4QQV4_RAT]	4.32879	5.31	2	3	3	3	3.87065e+06	508	57.3241	6.11279
Q6AYK3	Inositol-3-phosphate synthase 1 OS=Rattus norvegicus GN=Isyna1 PE=3 SV=2 - [INO1_RAT]	4.30761	4.31	1	2	2	2	2.71413e+06	557	60.8451	6.03662
M0RBK1	Phosphoribosyl pyrophosphate synthetase 1-like 1 (Predicted) OS=Rattus norvegicus GN=Prps1l1 PE=3 SV=1 - [M0RBK1_RAT]	4.26364	5.97	4	2	2	2	5.12782e+06	318	34.8299	6.53662
P35465	Serine/threonine-protein kinase PAK 1 OS=Rattus norvegicus GN=Pak1 PE=1 SV=3 - [PAK1_RAT]	4.24329	2.21	1	1	1	2	2.2689e+06	544	60.5397	5.85889
P34926	Microtubule-associated protein 1A OS=Rattus norvegicus GN=Map1a PE=1 SV=1 - [MAP1A_RAT]	4.24095	0.76	4	2	2	2	3.02333e+06	2774	299.348	4.94482
P28073	Proteasome subunit beta type-6 OS=Rattus norvegicus GN=Psmb6 PE=1 SV=3 - [PSB6_RAT]	4.22242	8.4	1	2	2	2	1.12102e+07	238	25.2734	4.99561
A0JPJ3	Arsb protein (Fragment) OS=Rattus norvegicus GN=Arsb PE=2 SV=1 - [A0JPJ3_RAT]	4.20781	2.1	2	1	1	2	929006	523	57.749	8.57275
P63170	Dynein light chain 1, cytoplasmic OS=Rattus norvegicus GN=Dynll1 PE=1 SV=1 - [DYL1_RAT]	4.18215	24.72	2	2	2	2	1.98331e+06	89	10.3591	7.40088
P25809	Creatine kinase U-type, mitochondrial OS=Rattus norvegicus GN=Ckmt1 PE=1 SV=1 - [KCRU_RAT]	4.13122	2.39	2	1	1	2	2.62122e+06	418	46.9993	8.48486
Q62951	Dihydropyrimidinase-related protein 4 (Fragment) OS=Rattus norvegicus GN=Dpysl4 PE=1 SV=1 - [DPYL4_RAT]	4.12324	2.84	2	1	1	1	1.14452e+06	564	61.0471	6.771
G3V8G2	Proteasome (Prosome, macropain) 26S subunit, non-ATPase, 5 (Predicted), isoform CRA_a OS=Rattus norvegicus GN=Psmd5 PE=4 SV=1 - [G3V8G2_RAT]	4.11721	4.37	2	2	2	2	1.22527e+06	504	55.8179	5.2749
Q00981	Ubiquitin carboxyl-terminal hydrolase isozyme L1 OS=Rattus norvegicus GN=Uchl1 PE=1 SV=2 - [UCHL1_RAT]	4.07958	8.07	1	2	2	2	1.13969e+07	223	24.8224	5.23682
D3ZME6	Uncharacterized protein (Fragment) OS=Rattus norvegicus GN=Syncrip PE=4 SV=2 - [D3ZME6_RAT]	4.07207	3.85	4	1	1	1	640698	338	38.257	9.05615
Q5XI32	F-actin-capping protein subunit beta OS=Rattus norvegicus GN=Capzb PE=1 SV=1 - [CAPZB_RAT]	4.06504	8.82	1	2	2	2	3.07105e+06	272	30.6094	5.99854
Q63570	26S protease regulatory subunit 6B OS=Rattus norvegicus GN=Psmc4 PE=1 SV=1 - [PRS6B_RAT]	4.05328	2.15	1	1	1	2	1.65887e+06	418	47.3786	5.21143
M0R741	Protein LOC683536 OS=Rattus norvegicus GN=LOC683536 PE=3 SV=1 - [M0R741_RAT]	4.03728	11.84	5	2	2	2	6.86609e+06	152	17.0948	5.2876
Q63569	26S protease regulatory subunit 6A OS=Rattus norvegicus GN=Psmc3 PE=2 SV=1 - [PRS6A_RAT]	3.98408	3.87	2	2	2	2	2.16923e+06	439	49.1294	5.23682
Q4V7D1	Signal sequence receptor, alpha OS=Rattus norvegicus GN=Ssr1 PE=2 SV=1 - [Q4V7D1_RAT]	3.97162	5.23	2	1	1	1	314795	287	32.1872	4.43701
P63086	Mitogen-activated protein kinase 1 OS=Rattus norvegicus GN=Mapk1 PE=1 SV=3 - [MK01_RAT]	3.93149	7.26	8	3	3	3	4.91018e+06	358	41.2492	6.97607
Q5M7A7	CB1 cannabinoid receptor-interacting protein 1 OS=Rattus norvegicus GN=Cnrip1 PE=1 SV=1 - [CNRP1_RAT]	3.92636	9.76	1	1	1	1	6.39197e+06	164	18.6466	7.85498
P51635	Alcohol dehydrogenase [NADP(+)] OS=Rattus norvegicus GN=Akr1a1 PE=1 SV=2 - [AK1A1_RAT]	3.8666	5.85	1	1	1	1	3.79298e+06	325	36.4829	7.31299
P37805	Transgelin-3 OS=Rattus norvegicus GN=Tagln3 PE=1 SV=2 - [TAGL3_RAT]	3.86053	11.06	1	2	2	2	3.91606e+06	199	22.4862	7.32764
F1M6N0	Protein LOC686143 OS=Rattus norvegicus GN=LOC686143 PE=4 SV=2 - [F1M6N0_RAT]	3.84471	10.53	1	2	2	3	1.76594e+07	285	29.4177	7.84033
P63329	Serine/threonine-protein phosphatase 2B catalytic subunit alpha isoform OS=Rattus norvegicus GN=Ppp3ca PE=1 SV=1 - [PP2BA_RAT]	3.82759	1.54	1	1	1	2	9.94223e+06	521	58.6063	5.85889
P63088	Serine/threonine-protein phosphatase PP1-gamma catalytic subunit OS=Rattus norvegicus GN=Ppp1cc PE=1 SV=1 - [PP1G_RAT]	3.81052	5.26	4	1	1	1	377561	323	36.9597	6.53662
P24268	Cathepsin D OS=Rattus norvegicus GN=Ctsd PE=1 SV=1 - [CATD_RAT]	3.78074	4.42	2	1	1	1	1.05681e+07	407	44.6519	7.09326
O35987	NSFL1 cofactor p47 OS=Rattus norvegicus GN=Nsfl1c PE=1 SV=1 - [NSF1C_RAT]	3.74219	4.32	1	1	1	1	1.94309e+06	370	40.6554	5.14795
M0R544	Glucosidase, alpha, acid, isoform CRA_a OS=Rattus norvegicus GN=Gaa PE=3 SV=1 - [M0R544_RAT]	3.721	1.89	2	1	1	1	3.45472e+06	953	106.136	5.68115
P11598	Protein disulfide-isomerase A3 OS=Rattus norvegicus GN=Pdia3 PE=1 SV=2 - [PDIA3_RAT]	3.70692	3.96	1	2	2	2	1.85829e+06	505	56.5877	6.21436
Q5PPJ7	Psmd1 protein (Fragment) OS=Rattus norvegicus GN=Psmd1 PE=2 SV=1 - [Q5PPJ7_RAT]	3.69299	1.42	5	1	1	1	1.61216e+06	846	93.2626	6.39209
Q5XI73	Rho GDP-dissociation inhibitor 1 OS=Rattus norvegicus GN=Arhgdia PE=1 SV=1 - [GDIR1_RAT]	3.64059	7.84	1	1	1	1	9.09011e+06	204	23.3928	5.19873
Q3MHS9	Chaperonin containing Tcp1, subunit 6A (Zeta 1) OS=Rattus norvegicus GN=Cct6a PE=2 SV=1 - [Q3MHS9_RAT]	3.63162	3.95	3	2	2	2	1.54046e+06	531	57.9807	7.07861
D4A269	Uncharacterized protein OS=Rattus norvegicus PE=4 SV=1 - [D4A269_RAT]	3.6313	11.11	2	1	1	1	4.38727e+06	126	13.7672	7.59131
P85968	6-phosphogluconate dehydrogenase, decarboxylating OS=Rattus norvegicus GN=Pgd PE=1 SV=1 - [6PGD_RAT]	3.62507	3.52	3	1	1	1	2.27313e+06	483	53.202	7.02002
Q68FQ0	T-complex protein 1 subunit epsilon OS=Rattus norvegicus GN=Cct5 PE=1 SV=1 - [TCPE_RAT]	3.60694	3.33	1	2	2	2	2.60094e+06	541	59.4988	5.71924
B0BNA5	Coactosin-like protein OS=Rattus norvegicus GN=Cotl1 PE=1 SV=1 - [COTL1_RAT]	3.60236	9.86	1	2	2	2	5.90243e+06	142	15.922	5.40186
P63245	Guanine nucleotide-binding protein subunit beta-2-like 1 OS=Rattus norvegicus GN=Gnb2l1 PE=1 SV=3 - [GBLP_RAT]	3.58546	6.62	1	2	2	2	1.90671e+06	317	35.0546	7.69385
Q5I0E7	Transmembrane emp24 domain-containing protein 9 OS=Rattus norvegicus GN=Tmed9 PE=1 SV=1 - [TMED9_RAT]	3.53163	4.68	1	1	1	1	1.75452e+06	235	27.011	8.26514
Q99NI1	Nucleoside diphosphate kinase OS=Rattus norvegicus GN=Nme3 PE=2 SV=1 - [Q99NI1_RAT]	3.51738	10.06	1	1	1	1	1.49022e+06	169	19.0769	6.34131
D4A3U3	Protein Ttc18 OS=Rattus norvegicus GN=Cfap70 PE=4 SV=2 - [D4A3U3_RAT]	3.5102	0.64	3	1	1	2	1.66416e+09	1097	123.062	5.63037
F1LP82	Ras-related protein Rab-2A (Fragment) OS=Rattus norvegicus GN=Rab2a PE=3 SV=2 - [F1LP82_RAT]	3.38652	6.63	3	1	1	1	3.21653e+06	196	21.6828	6.53662
B2GV73	Actin-related protein 2/3 complex subunit 3 OS=Rattus norvegicus GN=Arpc3 PE=2 SV=1 - [B2GV73_RAT]	3.35969	7.3	1	1	1	1	550652	178	20.5223	8.60205
Q00715	Histone H2B type 1 OS=Rattus norvegicus PE=1 SV=2 - [H2B1_RAT]	3.34575	12	10	1	1	1	1.87327e+06	125	13.9816	10.3599
Q4KLH2	Phosphopantothenoylcysteine synthetase OS=Rattus norvegicus GN=Ppcs PE=2 SV=1 - [Q4KLH2_RAT]	3.29566	4.41	2	1	1	2		204	21.7873	8.88037
Q6IFT2	Type II keratin Kb40 (Fragment) OS=Rattus norvegicus GN=Krt78 PE=2 SV=1 - [Q6IFT2_RAT]	3.28827	2.46	3	1	1	1	3.39531e+07	488	54.2261	5.66846
B2RZ71	Inhibitor of growth protein OS=Rattus norvegicus GN=Ing5 PE=2 SV=1 - [B2RZ71_RAT]	3.27749	8.33	2	2	2	2	4.57583e+06	240	27.8097	7.63525
Q6LDG5	Hypoxanthine-guanine phosporibosyltransferase (Fragment) OS=Rattus norvegicus GN=Hprt1 PE=2 SV=1 - [Q6LDG5_RAT]	3.26168	8.13	3	1	1	1	4.74997e+06	160	17.8724	8.74854
Q5RKI1	Eukaryotic initiation factor 4A-II OS=Rattus norvegicus GN=Eif4a2 PE=1 SV=1 - [IF4A2_RAT]	3.10449	6.14	2	2	2	2	6.06237e+06	407	46.3728	5.47803
D4A5U3	Protein-glutamine gamma-glutamyltransferase E OS=Rattus norvegicus GN=Tgm3 PE=3 SV=1 - [TGM3_RAT]	3.08474	1.88	1	1	1	2	4.72381e+07	693	77.182	6.88818
Q63081	Protein disulfide-isomerase A6 OS=Rattus norvegicus GN=Pdia6 PE=1 SV=2 - [PDIA6_RAT]	3.0114	3.18	1	1	1	1	635646	440	48.1433	5.13525
P11232	Thioredoxin OS=Rattus norvegicus GN=Txn PE=1 SV=2 - [THIO_RAT]	3.00128	12.38	1	1	1	1	4.9821e+06	105	11.6657	4.91943
A0A096MK73	Protein RGD1565395 OS=Rattus norvegicus GN=RGD1565395 PE=4 SV=1 - [A0A096MK73_RAT]	2.99589	10.32	2	1	1	1	6.62097e+06	126	14.6277	7.48877
Q9QYW2	Cysteine sulfinate decarboxylase (Fragment) OS=Rattus norvegicus GN=CSD PE=4 SV=1 - [Q9QYW2_RAT]	2.99279	12.96	4	1	1	1		108	12.1624	5.87158
M0R4F4	Uncharacterized protein (Fragment) OS=Rattus norvegicus PE=3 SV=1 - [M0R4F4_RAT]	2.91085	7.84	1	1	1	1	4.50202e+06	268	29.0965	8.47021
P10111	Peptidyl-prolyl cis-trans isomerase A OS=Rattus norvegicus GN=Ppia PE=1 SV=2 - [PPIA_RAT]	2.86511	14.02	2	2	2	2	7.5452e+06	164	17.8628	8.1626
F1LPA6	Peptidyl arginine deiminase, type II, isoform CRA_a OS=Rattus norvegicus GN=Padi2 PE=4 SV=2 - [F1LPA6_RAT]	2.84317	1.95	2	1	1	1	2.36025e+06	665	75.2091	5.42725
O70196	Prolyl endopeptidase OS=Rattus norvegicus GN=Prep PE=1 SV=1 - [PPCE_RAT]	2.84312	1.83	1	1	1	1	1.61148e+06	710	80.6899	5.93506
G3V6X7	Proprotein convertase subtilisin/kexin type 1 inhibitor OS=Rattus norvegicus GN=Pcsk1n PE=4 SV=1 - [G3V6X7_RAT]	2.83274	4.62	2	1	1	1	7.08075e+06	260	27.4558	5.59229
Q0HA14	Rae-like protein (Fragment) OS=Rattus norvegicus GN=Raet1e PE=2 SV=1 - [Q0HA14_RAT]	2.83015	6.44	4	1	1	1	1.71741e+09	202	21.9779	6.84424
Q566C7	Diphosphoinositol polyphosphate phosphohydrolase 1 OS=Rattus norvegicus GN=Nudt3 PE=1 SV=1 - [NUDT3_RAT]	2.82871	8.33	1	1	1	1	2.10937e+07	168	19.0836	6.34131
A0A096P6M7	Protein LOC102554637 OS=Rattus norvegicus GN=LOC102554637 PE=4 SV=1 - [A0A096P6M7_RAT]	2.82806	8.13	2	1	1	1		246	26.2759	5.08447
B0BN63	LOC681996 protein OS=Rattus norvegicus GN=Ahsa1 PE=2 SV=1 - [B0BN63_RAT]	2.82786	6.51	1	1	1	2	1.46631e+06	338	38.0802	5.52881
Q02356	AMP deaminase 2 OS=Rattus norvegicus GN=Ampd2 PE=2 SV=2 - [AMPD2_RAT]	2.78587	2.18	1	1	1	1	1.02835e+06	824	94.7269	6.50732
Q5XIM9	T-complex protein 1 subunit beta OS=Rattus norvegicus GN=Cct2 PE=1 SV=3 - [TCPB_RAT]	2.77776	2.24	1	1	1	1	2.69101e+06	535	57.4221	6.45557
D3ZWR4	Copine VII (Predicted), isoform CRA_b OS=Rattus norvegicus GN=Cpne7 PE=4 SV=1 - [D3ZWR4_RAT]	2.77085	1.85	12	1	1	1	3.20932e+06	486	54.0848	5.03369
P29066	Beta-arrestin-1 OS=Rattus norvegicus GN=Arrb1 PE=1 SV=1 - [ARRB1_RAT]	2.76122	2.63	1	1	1	1	698447	418	46.9902	6.27783
Q7M767	Ubiquitin-conjugating enzyme E2 variant 2 OS=Rattus norvegicus GN=Ube2v2 PE=1 SV=3 - [UB2V2_RAT]	2.76097	6.9	2	1	1	1	8318620	145	16.3422	8.08936
F1LRS2	Protein Dock7 OS=Rattus norvegicus GN=Dock7 PE=4 SV=2 - [F1LRS2_RAT]	2.74777	0.76	1	1	1	1	1.21612e+07	2118	239.908	7.13721
Q06FK3	Sulfotransferase (Fragment) OS=Rattus norvegicus GN=Sult4a1 PE=2 SV=1 - [Q06FK3_RAT]	2.74139	10.09	2	1	1	1	422210	109	12.6462	6.91748
G3V8T4	DNA damage-binding protein 1 OS=Rattus norvegicus GN=Ddb1 PE=4 SV=1 - [G3V8T4_RAT]	2.71155	4.04	2	4	4	4	3.65869e+06	1140	126.86	5.26221
M0R5G3	Uncharacterized protein (Fragment) OS=Rattus norvegicus PE=4 SV=1 - [M0R5G3_RAT]	2.68161	5.45	1	1	1	1	9.48186e+07	165	19.3074	9.33447
F1M1M4	Protein Dst (Fragment) OS=Rattus norvegicus GN=Dst PE=4 SV=1 - [F1M1M4_RAT]	2.67608	0.54	5	1	1	1	6.30652e+06	2603	299.994	6.40479
D4A213	Protein Scara5 OS=Rattus norvegicus GN=Scara5 PE=4 SV=2 - [D4A213_RAT]	2.64307	4.27	1	1	1	1	2.56069e+06	492	53.759	6.72705
Q9EPB1	Dipeptidyl peptidase 2 OS=Rattus norvegicus GN=Dpp7 PE=1 SV=1 - [DPP2_RAT]	2.58634	2	1	1	1	1	2.18994e+06	500	55.079	5.04639
D3ZPV8	Protein Ggct OS=Rattus norvegicus GN=Ggct PE=4 SV=1 - [D3ZPV8_RAT]	2.57503	5.85	1	1	1	1	1.52983e+07	188	21.2175	5.43994
D3ZT40	Glyceraldehyde-3-phosphate dehydrogenase (Fragment) OS=Rattus norvegicus PE=3 SV=2 - [D3ZT40_RAT]	2.53398	4.66	1	1	1	1	1.32596e+06	322	35.072	9.1001
F1M062	Protein Larp1 (Fragment) OS=Rattus norvegicus GN=Larp1 PE=4 SV=2 - [F1M062_RAT]	2.52756	2.3	1	1	1	1	1.49552e+07	956	109.179	8.92432
Q793F9	Vacuolar protein sorting-associated protein 4A OS=Rattus norvegicus GN=Vps4a PE=2 SV=1 - [VPS4A_RAT]	2.52692	3.89	2	1	1	1	2.16336e+07	437	48.8761	7.79639
P63100	Calcineurin subunit B type 1 OS=Rattus norvegicus GN=Ppp3r1 PE=1 SV=2 - [CANB1_RAT]	2.51251	10	1	1	1	1		170	19.2876	4.80518
B2GUZ5	F-actin-capping protein subunit alpha-1 OS=Rattus norvegicus GN=Capza1 PE=1 SV=1 - [CAZA1_RAT]	2.50292	3.5	2	1	1	1	5.09863e+06	286	32.8893	5.69385
Q99PV2	Protein Stxbp3 OS=Rattus norvegicus GN=Stxbp3 PE=2 SV=1 - [Q99PV2_RAT]	2.50123	3.2	1	1	1	1	1.10429e+07	593	67.9769	8.01611
D4AAG8	Protein Smchd1 OS=Rattus norvegicus GN=Smchd1 PE=4 SV=1 - [D4AAG8_RAT]	2.49139	0.7	1	1	1	1	8969820	2006	225.902	7.34229
M0RAV0	Uncharacterized protein (Fragment) OS=Rattus norvegicus PE=4 SV=1 - [M0RAV0_RAT]	2.48551	13.98	8	1	1	1	1.82202e+06	93	10.1229	7.12256
Q6LDS4	Superoxide dismutase [Cu-Zn] OS=Rattus norvegicus GN=Sod1 PE=2 SV=1 - [Q6LDS4_RAT]	2.47386	23.03	3	3	3	3	7.27379e+06	152	15.6997	6.354
D3ZXL0	Protein Slc26a10 OS=Rattus norvegicus GN=Slc26a10 PE=4 SV=2 - [D3ZXL0_RAT]	2.47135	1.17	1	1	1	1	2.2257e+09	684	73.8763	7.97217
F1LPV1	Ectonucleoside triphosphate diphosphohydrolase 8 OS=Rattus norvegicus GN=Entpd8 PE=3 SV=2 - [F1LPV1_RAT]	2.45177	2.43	2	1	1	1		494	54.3255	6.22705
Q6AZ40	Prpsap2 protein OS=Rattus norvegicus GN=Prpsap2 PE=2 SV=1 - [Q6AZ40_RAT]	2.44936	4.95	4	1	1	1		283	31.2724	6.93213
D3ZZ32	Prolyl endopeptidase-like OS=Rattus norvegicus GN=Prepl PE=4 SV=2 - [D3ZZ32_RAT]	2.44205	1.38	2	1	1	1	1.35907e+06	726	83.6081	6.72705
Q5XHY5	Threonine--tRNA ligase, cytoplasmic OS=Rattus norvegicus GN=Tars PE=2 SV=1 - [SYTC_RAT]	2.43766	1.73	1	1	1	1	1.45007e+06	695	80.5245	6.94678
O88975	N-ethylmaleimide sensitive factor NSF (Fragment) OS=Rattus norvegicus GN=Nsf PE=2 SV=1 - [O88975_RAT]	2.39481	5.62	3	1	1	1	1.36825e+06	178	19.6003	6.04932
F1M1J2	Uncharacterized protein (Fragment) OS=Rattus norvegicus GN=Neb PE=4 SV=2 - [F1M1J2_RAT]	2.39478	0.5	2	1	1	1	3.78795e+06	3009	348.454	9.1001
M0RC66	Adenylate kinase isoenzyme 1 (Fragment) OS=Rattus norvegicus GN=Ak1 PE=3 SV=1 - [M0RC66_RAT]	2.38714	6.22	2	1	1	1	1.29907e+06	193	21.2782	9.15869
Q4FZT2	Protein phosphatase methylesterase 1 OS=Rattus norvegicus GN=Ppme1 PE=1 SV=2 - [PPME1_RAT]	2.37662	2.33	2	1	1	1	1.5207e+06	386	42.2892	5.97314
D4AA63	Protein Ubqln2 OS=Rattus norvegicus GN=Ubqln2 PE=4 SV=1 - [D4AA63_RAT]	2.36417	2.51	1	1	1	1	4.92665e+06	638	67.2175	5.22412
D3ZGJ2	Protein Espnl OS=Rattus norvegicus GN=Espnl PE=4 SV=2 - [D3ZGJ2_RAT]	2.3613	1.3	1	1	1	2	1.03027e+07	999	108.319	5.87158
G3V733	Synapsin-2 OS=Rattus norvegicus GN=Syn2 PE=4 SV=2 - [G3V733_RAT]	2.35142	1.77	2	1	1	1	1.807e+06	564	60.7894	8.06006
P63055	Purkinje cell protein 4 OS=Rattus norvegicus GN=Pcp4 PE=1 SV=2 - [PCP4_RAT]	2.34012	16.13	2	1	1	1	2.92588e+06	62	6.80329	6.7124
P24155	Thimet oligopeptidase OS=Rattus norvegicus GN=Thop1 PE=1 SV=4 - [THOP1_RAT]	2.33086	2.33	1	1	1	1	696217	687	78.3354	5.93506
G3V9W9	Protein Fat1 OS=Rattus norvegicus GN=Fat1 PE=4 SV=1 - [G3V9W9_RAT]	2.32354	0.44	2	1	1	1		4589	505.765	5.0083
Q4V8G6	Methyltransferase-like 3 OS=Rattus norvegicus GN=Mettl3 PE=2 SV=1 - [Q4V8G6_RAT]	2.30993	1.38	1	1	1	1	2813058158	580	64.6447	6.53662
Q9ERF9	Actin-related protein 3 (Fragment) OS=Rattus norvegicus GN=Actr3 PE=2 SV=1 - [Q9ERF9_RAT]	2.30417	10.59	2	1	1	1	1.09565e+07	85	9.77903	9.24658
P12785	Fatty acid synthase OS=Rattus norvegicus GN=Fasn PE=1 SV=3 - [FAS_RAT]	2.29832	0.36	1	1	1	1	2.24612e+06	2505	272.478	6.39209
Q99MI7	NEDD8-activating enzyme E1 catalytic subunit OS=Rattus norvegicus GN=Uba3 PE=1 SV=1 - [UBA3_RAT]	2.2963	2.38	2	1	1	1	676886	462	51.6903	5.45264
M0RCP0	Protein LOC100910255 (Fragment) OS=Rattus norvegicus GN=LOC100910255 PE=4 SV=1 - [M0RCP0_RAT]	2.29429	1.17	5	1	1	1	1.38853e+07	1623	178.743	4.24658
P50475	Alanine--tRNA ligase, cytoplasmic OS=Rattus norvegicus GN=Aars PE=1 SV=3 - [SYAC_RAT]	2.28424	1.14	1	1	1	1	2.26522e+06	968	106.723	5.61768
Q6P7R0	Coronin OS=Rattus norvegicus GN=Coro1b PE=2 SV=1 - [Q6P7R0_RAT]	2.28353	3.78	3	1	1	1	2.24246e+06	291	32.2584	7.89893
Q5I0D7	Xaa-Pro dipeptidase OS=Rattus norvegicus GN=Pepd PE=2 SV=1 - [PEPD_RAT]	2.27718	3.46	1	2	2	2	4.86442e+06	492	54.7149	5.94775
Q5I0D5	Phospholysine phosphohistidine inorganic pyrophosphate phosphatase OS=Rattus norvegicus GN=Lhpp PE=2 SV=1 - [LHPP_RAT]	2.26954	2.96	1	1	1	1	7.00787e+06	270	29.1717	5.38916
M0R7W5	Protein LOC100363449 OS=Rattus norvegicus GN=LOC100363449 PE=4 SV=1 - [M0R7W5_RAT]	2.26926	4.64	1	1	1	1	7.56079e+08	237	26.9597	6.52197
O35263	Platelet-activating factor acetylhydrolase IB subunit gamma OS=Rattus norvegicus GN=Pafah1b3 PE=2 SV=1 - [PA1B3_RAT]	2.26492	3.88	1	1	1	1	1.69593e+06	232	25.8473	6.93213
D4A1I6	Protein Pla2g4b OS=Rattus norvegicus GN=Pla2g4b PE=4 SV=1 - [D4A1I6_RAT]	2.24715	1.01	1	1	1	1	2798952173	791	89.4982	6.44287
D4A390	Like-glycosyltransferase (Predicted), isoform CRA_a OS=Rattus norvegicus GN=Large PE=4 SV=1 - [D4A390_RAT]	2.21873	5.45	1	1	1	1		385	43.6554	7.76709
P01946	Hemoglobin subunit alpha-1/2 OS=Rattus norvegicus GN=Hba1 PE=1 SV=3 - [HBA_RAT]	2.19542	6.34	2	1	1	1	5.74197e+06	142	15.3188	7.97217
F1M2F6	Pyruvate kinase (Fragment) OS=Rattus norvegicus PE=3 SV=2 - [F1M2F6_RAT]	2.18537	1.78	1	1	1	1	1.56913e+08	505	55.0645	7.40088
D3ZWS9	Protein Kb23 OS=Rattus norvegicus GN=Kb23 PE=3 SV=2 - [D3ZWS9_RAT]	2.18249	1.64	12	1	1	1	5.01166e+06	427	47.8476	5.38916
B2GUW7	Rnase4 protein OS=Rattus norvegicus GN=LOC501979 PE=2 SV=1 - [B2GUW7_RAT]	2.17432	10.53	2	1	1	1	893987	114	12.6987	6.17627
P38983	40S ribosomal protein SA OS=Rattus norvegicus GN=Rpsa PE=1 SV=3 - [RSSA_RAT]	2.15489	2.71	1	1	1	1	2.00633e+06	295	32.8034	4.86865
D3ZG17	Membrane metallo-endopeptidase-like 1 OS=Rattus norvegicus GN=Mmel1 PE=4 SV=1 - [D3ZG17_RAT]	2.14734	1.73	2	1	1	1	3.27221e+07	753	86.5897	6.41748
Q99MI5	Protein LOC100912604 OS=Rattus norvegicus GN=LOC100912604 PE=2 SV=1 - [Q99MI5_RAT]	2.13227	3.31	1	1	1	1	3.18691e+06	302	33.9748	5.64307
D4A5Z6	Protein Ccdc34 OS=Rattus norvegicus GN=Ccdc34 PE=4 SV=1 - [D4A5Z6_RAT]	2.11615	5.14	1	1	1	1	9.48657e+06	311	35.6831	6.97607
P34067	Proteasome subunit beta type-4 OS=Rattus norvegicus GN=Psmb4 PE=1 SV=2 - [PSB4_RAT]	2.11521	3.8	2	1	1	1	1.32767e+07	263	29.1784	6.91748
D4ADL2	Protein LOC102547754 OS=Rattus norvegicus GN=LOC102547754 PE=3 SV=2 - [D4ADL2_RAT]	2.11146	3.92	5	1	1	1	3.21445e+06	255	29.6421	4.48779
D4AC23	Protein Cct7 OS=Rattus norvegicus GN=Cct7 PE=3 SV=1 - [D4AC23_RAT]	2.0955	1.47	1	1	1	1	1.76833e+06	544	59.6202	8.00146
B0BNB8	Calml4 protein OS=Rattus norvegicus GN=Calml4 PE=2 SV=1 - [B0BNB8_RAT]	2.09356	7.84	1	1	1	1		153	17.7171	7.95752
D3ZVL4	Protein RGD1564308 OS=Rattus norvegicus GN=RGD1564308 PE=4 SV=2 - [D3ZVL4_RAT]	2.08762	4.11	1	1	1	1	3.04485e+06	316	35.388	9.71533
Q9JHW0	Proteasome subunit beta type-7 OS=Rattus norvegicus GN=Psmb7 PE=1 SV=1 - [PSB7_RAT]	2.07535	3.61	1	1	1	1	4.04031e+06	277	29.9083	7.97217
P24090	Alpha-2-HS-glycoprotein OS=Rattus norvegicus GN=Ahsg PE=1 SV=2 - [FETUA_RAT]	2.07424	1.99	1	1	1	1	5.61875e+06	352	37.9582	6.50732
Q5XID7	Armadillo repeat-containing X-linked protein 3 OS=Rattus norvegicus GN=Armcx3 PE=2 SV=1 - [ARMX3_RAT]	2.07195	4.75	1	1	1	1	2.05399e+06	379	42.5259	8.36768
Q5U318	Astrocytic phosphoprotein PEA-15 OS=Rattus norvegicus GN=Pea15 PE=1 SV=1 - [PEA15_RAT]	2.06665	7.69	1	1	1	1	3.73468e+06	130	15.0308	5.021
P70482	Lamin C2 (Fragment) OS=Rattus norvegicus GN=C2.1 PE=2 SV=1 - [P70482_RAT]	2.05409	2.39	3	1	1	1	928903	461	52.4728	6.63916
R9PXV7	Protein phosphatase 1 regulatory subunit 7 (Fragment) OS=Rattus norvegicus GN=Ppp1r7 PE=4 SV=1 - [R9PXV7_RAT]	2.04869	4.19	2	1	1	1	1.73558e+06	215	24.8724	7.40088
F1M154	Protein Ccdc154 (Fragment) OS=Rattus norvegicus GN=Ccdc154 PE=4 SV=2 - [F1M154_RAT]	2.04339	1.36	1	1	1	1	2.61974e+06	663	75.6881	5.51611
D3ZIP1	Protein Kcnrg OS=Rattus norvegicus GN=Kcnrg PE=4 SV=1 - [D3ZIP1_RAT]	2.03872	3.36	1	1	1	1	1.13694e+07	268	30.0095	8.29443
F1LMZ8	26S proteasome non-ATPase regulatory subunit 11 OS=Rattus norvegicus GN=Psmd11 PE=3 SV=2 - [PSD11_RAT]	2.0301	2.84	3	1	1	1	783587	422	47.434	6.48096
D3ZGE2	Myeloperoxidase (Mapped) OS=Rattus norvegicus GN=Mpo PE=4 SV=1 - [D3ZGE2_RAT]	2.00234	2.18	2	1	1	1	1.58481e+06	458	51.8501	9.93506
G3V913	Heat shock 27kDa protein 1 OS=Rattus norvegicus GN=Hspb1 PE=3 SV=1 - [G3V913_RAT]	1.98892	4.85	2	1	1	1	7.79595e+06	206	22.7935	6.21436
D3ZPS5	Protein S100a14 OS=Rattus norvegicus GN=S100a14 PE=4 SV=2 - [D3ZPS5_RAT]	1.96906	13.46	1	1	1	1	1.58967e+07	52	5.84688	4.77979
Q3S2I2	Kinase-deficient WNK1 variant protein (Fragment) OS=Rattus norvegicus GN=Wnk1 PE=2 SV=1 - [Q3S2I2_RAT]	1.96066	6.88	5	1	1	1	1421118	160	18.4572	4.85596
D4A3N4	Adenylate cyclase 1 (Predicted) OS=Rattus norvegicus GN=Adcy1 PE=3 SV=2 - [D4A3N4_RAT]	1.95701	0.83	1	1	1	1	1.55607e+06	967	108.191	8.44092
G3V755	Cornifin-A OS=Rattus norvegicus GN=Sprr1a PE=4 SV=1 - [G3V755_RAT]	1.94743	31.58	2	1	1	1	1.09484e+08	152	16.7211	7.43018
P10760	Adenosylhomocysteinase OS=Rattus norvegicus GN=Ahcy PE=1 SV=3 - [SAHH_RAT]	1.94717	1.85	2	1	1	1	8.11408e+06	432	47.5072	6.53662
Q0QER8	Isocitrate dehydrogenase 1 (Fragment) OS=Rattus norvegicus GN=Idh1 PE=2 SV=1 - [Q0QER8_RAT]	1.92792	2.38	3	1	1	1	4.3404e+06	378	42.6283	6.37939
D3ZPR0	Chromosome segregation 1-like (S. cerevisiae) (Predicted) OS=Rattus norvegicus GN=Cse1l PE=4 SV=1 - [D3ZPR0_RAT]	1.92701	0.82	1	1	1	1	1.2299e+07	971	110.144	5.77002
D4A5W5	Protein Recql4 OS=Rattus norvegicus GN=Recql4 PE=4 SV=1 - [D4A5W5_RAT]	1.92589	0.66	1	1	1	1	3.19772e+06	1216	134.591	8.52881
D3ZEP2	Norrie disease homolog (Human) (Predicted), isoform CRA_a OS=Rattus norvegicus GN=LOC100909913 PE=4 SV=1 - [D3ZEP2_RAT]	1.92097	10.69	1	1	1	1		131	14.69	8.70459
O08837	Cell division cycle 5-like protein OS=Rattus norvegicus GN=Cdc5l PE=1 SV=2 - [CDC5L_RAT]	1.91776	1.12	1	1	1	1	1.68218e+06	802	92.1606	8.01611
G3V8E9	Kallikrein 8 (Neuropsin/ovasin) OS=Rattus norvegicus GN=Klk8 PE=3 SV=1 - [G3V8E9_RAT]	1.90336	3.46	2	1	1	1	1.57477e+06	260	28.4771	8.25049
E9PSV5	Phosphoserine aminotransferase OS=Rattus norvegicus GN=Psat1 PE=3 SV=2 - [E9PSV5_RAT]	1.90156	2.43	3	1	1	1	2.60056e+06	370	40.4649	7.97217
D4AB17	Protein LOC100912917 OS=Rattus norvegicus GN=LOC100912917 PE=4 SV=2 - [D4AB17_RAT]	1.89206	0.86	1	1	1	1	6.53201e+06	1273	136.966	5.69385
G3V7L6	26S protease regulatory subunit 7 OS=Rattus norvegicus GN=Psmc2 PE=3 SV=1 - [G3V7L6_RAT]	1.86655	2.54	2	1	1	1	1.13551e+06	433	48.6031	5.94775
P19132	Ferritin heavy chain OS=Rattus norvegicus GN=Fth1 PE=1 SV=3 - [FRIH_RAT]	1.85055	3.85	7	1	1	1	8.69877e+06	182	21.1133	6.30322
B0K017	ADP-ribosylhydrolase like 2 OS=Rattus norvegicus GN=Adprhl2 PE=2 SV=1 - [B0K017_RAT]	1.83271	3.24	1	1	1	1	770972	370	39.3503	4.95752
F1M5Z5	Anoctamin OS=Rattus norvegicus GN=Ano6 PE=3 SV=2 - [F1M5Z5_RAT]	1.82522	1.13	1	1	1	1	4.25266e+07	799	92.1668	6.68311
D3ZAV9	Uncharacterized protein OS=Rattus norvegicus PE=3 SV=1 - [D3ZAV9_RAT]	1.81778	2.82	2	1	1	1	3.77888e+06	213	24.0439	9.96436
Q04940	Neurogranin OS=Rattus norvegicus GN=Nrgn PE=1 SV=1 - [NEUG_RAT]	1.81142	7.69	2	1	1	1	9.73398e+06	78	7.49151	7.04932
R9PXT9	cAMP-dependent protein kinase type II-beta regulatory subunit (Fragment) OS=Rattus norvegicus GN=Prkar2b PE=4 SV=1 - [R9PXT9_RAT]	1.81017	11.04	5	4	4	4	2.14915e+06	308	34.5203	5.12256
Q6IRJ7	Annexin OS=Rattus norvegicus GN=Anxa7 PE=2 SV=1 - [Q6IRJ7_RAT]	1.79246	2.38	2	1	1	1	7.52232e+07	463	49.9873	6.17627
D3ZGY3	Protein LOC100909453 OS=Rattus norvegicus GN=Vom2r58 PE=4 SV=1 - [D3ZGY3_RAT]	1.76818	0.82	2	1	1	1	1.18278e+07	857	97.9723	6.771
Q9QYB9	Bile acid sensitive methotrexate carrier 2 OS=Rattus norvegicus GN=Slc19a1 PE=2 SV=1 - [Q9QYB9_RAT]	1.76563	2.13	6	1	1	1	4.85316e+06	329	37.8178	9.39307
G3V8G4	Brevican core protein OS=Rattus norvegicus GN=Bcan PE=4 SV=1 - [G3V8G4_RAT]	1.75761	0.91	2	1	1	1	4.6829e+06	883	95.9411	4.94482
Q4FZT9	26S proteasome non-ATPase regulatory subunit 2 OS=Rattus norvegicus GN=Psmd2 PE=2 SV=1 - [PSMD2_RAT]	1.75667	0.77	1	1	1	1	870881	908	100.124	5.19873
Q63720	SIRR-1 OS=Rattus norvegicus PE=2 SV=1 - [Q63720_RAT]	1.75124	1.95	4	1	2	2	8.55242e+08	410	44.6962	6.55127
Q64638	UDP-glucuronosyltransferase 1-5 OS=Rattus norvegicus GN=Ugt1a5 PE=2 SV=1 - [UD15_RAT]	1.73679	1.51	3	1	1	1	1.58453e+07	531	59.954	8.68994
E9PTI2	Lysozyme OS=Rattus norvegicus GN=Lyz2 PE=3 SV=2 - [E9PTI2_RAT]	1.71274	5.98	7	1	1	1	1.99877e+07	117	13.0828	6.84424
Q8CGL8	Secretogranin II variant (Fragment) OS=Rattus norvegicus GN=Scg2 PE=2 SV=1 - [Q8CGL8_RAT]	1.70927	2.17	4	1	1	1	3.08882e+06	322	37.1012	4.57666
Q07009	Calpain-2 catalytic subunit OS=Rattus norvegicus GN=Capn2 PE=1 SV=3 - [CAN2_RAT]	1.69169	1.14	1	1	1	2	6.26265e+06	700	79.8688	4.95752
D3ZHR6	Protein Cyth4 OS=Rattus norvegicus GN=Cyth4 PE=4 SV=1 - [D3ZHR6_RAT]	1.67433	2.16	1	1	1	1	9.70793e+07	371	42.5064	8.57275
O54975	Xaa-Pro aminopeptidase 1 OS=Rattus norvegicus GN=Xpnpep1 PE=1 SV=1 - [XPP1_RAT]	1.67363	1.44	1	1	1	1	721324	623	69.6131	5.60498
Q6AXU4	E3 ubiquitin-protein ligase RNF181 OS=Rattus norvegicus GN=Rnf181 PE=1 SV=1 - [RN181_RAT]	1.66301	4.85	1	1	1	1	4.0141e+08	165	19.2753	6.04932
G3V8C3	Vimentin OS=Rattus norvegicus GN=Vim PE=3 SV=1 - [G3V8C3_RAT]	1.64413	1.93	4	1	1	1	1.68079e+06	466	53.6681	5.12256
D3ZEM9	Nitric oxide synthase OS=Rattus norvegicus GN=Nos1 PE=3 SV=2 - [D3ZEM9_RAT]	1.63531	0.53	4	1	1	1	4.00298e+07	1324	148.355	7.37158
F1M7D0	Protein Pcdhb2 (Fragment) OS=Rattus norvegicus GN=Pcdhb2 PE=4 SV=1 - [F1M7D0_RAT]	1.63343	1.5	1	1	1	1	526621	798	87.5169	4.83057
D4A3R6	Protein Zmym2 OS=Rattus norvegicus GN=Zmym2 PE=1 SV=2 - [D4A3R6_RAT]	1.62036	0.65	1	1	1	1	1.17525e+07	1382	155.266	6.7417
Q76KC5	CAMP-specific cyclic nucleotide phosphodiesterase PDE8 OS=Rattus norvegicus GN=Pde8b PE=2 SV=1 - [Q76KC5_RAT]	1.61175	0.79	1	1	1	1	1.02053e+08	761	86.1461	6.69775
D3ZQE7	Protein Jakmip2 OS=Rattus norvegicus GN=Jakmip2 PE=4 SV=2 - [D3ZQE7_RAT]	1.60855	1.05	1	1	1	1	3.27713e+07	857	100.184	7.66455
P11348	Dihydropteridine reductase OS=Rattus norvegicus GN=Qdpr PE=1 SV=1 - [DHPR_RAT]	0	2.9	1	1	1	1	5.29833e+06	241	25.5359	7.81104
Q5FVM7	DnaJ homolog subfamily C member 16 OS=Rattus norvegicus GN=Dnajc16 PE=2 SV=1 - [DJC16_RAT]	0	2.08	1	1	1	1	3288948	771	88.8137	7.28369
Q7TQ20	DnaJ homolog subfamily C member 2 OS=Rattus norvegicus GN=Dnajc2 PE=2 SV=1 - [DNJC2_RAT]	0	1.93	1	1	1	1	9.60967e+06	621	71.7245	8.79248
Q4FZY0	EF-hand domain-containing protein D2 OS=Rattus norvegicus GN=Efhd2 PE=1 SV=1 - [EFHD2_RAT]	0	2.93	1	1	1	1	945738	239	26.7425	5.07178
P31424	Metabotropic glutamate receptor 5 OS=Rattus norvegicus GN=Grm5 PE=1 SV=2 - [GRM5_RAT]	0	1.41	1	1	1	1		1203	131.8	7.78174
Q6GT70	CD74 antigen (Invariant polypeptide of major histocompatibility complex, class II antigen-associated), isoform CRA_c OS=Rattus norvegicus GN=Cd74 PE=2 SV=1 - [Q6GT70_RAT]	0	4.63	2	1	1	1		216	24.4874	9.08545
Q6AYF4	Integrin beta-6 OS=Rattus norvegicus GN=Itgb6 PE=2 SV=1 - [ITB6_RAT]	0	3.05	1	1	1	1		787	85.9021	5.33838
Q568Z9	Phytanoyl-CoA hydroxylase-interacting protein OS=Rattus norvegicus GN=Phyhip PE=2 SV=1 - [PHYIP_RAT]	0	1.82	1	1	1	1	1.95894e+06	330	37.5305	7.00537
P18420	Proteasome subunit alpha type-1 OS=Rattus norvegicus GN=Psma1 PE=1 SV=2 - [PSA1_RAT]	0	3.42	1	1	1	1	2.65464e+06	263	29.4988	6.60986
P70564	Serpin B5 OS=Rattus norvegicus GN=Serpinb5 PE=2 SV=1 - [SPB5_RAT]	0	4.53	2	1	1	2	2.09599e+06	375	42.0367	6.1001
P09951	Synapsin-1 OS=Rattus norvegicus GN=Syn1 PE=1 SV=3 - [SYN1_RAT]	0	1.42	1	1	1	1	1.63394e+06	704	73.9426	9.80322
P85972	Vinculin OS=Rattus norvegicus GN=Vcl PE=1 SV=1 - [VINC_RAT]	0	2.06	2	1	1	1	841778	1066	116.542	6.0874
Q5RKI0	WD repeat-containing protein 1 OS=Rattus norvegicus GN=Wdr1 PE=1 SV=3 - [WDR1_RAT]	0	1.32	1	1	1	1	17998513	606	66.1399	6.62451
D4A2G9	Protein RGD1565297 OS=Rattus norvegicus GN=Ranbp1 PE=4 SV=1 - [D4A2G9_RAT]	0	3.45	1	1	1	1	4.14292e+06	203	23.5817	5.22412
B2RYC8	Interleukin-1 receptor-associated kinase 3 OS=Rattus norvegicus GN=Irak3 PE=2 SV=1 - [B2RYC8_RAT]	0	2.3	1	1	1	1		610	68.9328	6.97607
G3V647	Protein RGD1566085 OS=Rattus norvegicus GN=Pdxk PE=4 SV=1 - [G3V647_RAT]	0	8.65	3	2	2	2	4.03379e+06	312	34.8326	6.80029
Q6YDN8	BWK-1 OS=Rattus norvegicus GN=Gid8 PE=2 SV=1 - [Q6YDN8_RAT]	0	10.53	1	1	1	1		228	26.7617	4.97021
D3ZVK3	Protein LOC365444 OS=Rattus norvegicus GN=Trmt6 PE=4 SV=1 - [D3ZVK3_RAT]	0	3.43	1	1	1	1		495	55.2442	7.91357
G3V6Q9	BMP/retinoic acid-inducible neural-specific protein 1 OS=Rattus norvegicus GN=Brinp1 PE=4 SV=1 - [G3V6Q9_RAT]	0	1.71	2	1	1	1	2.71565e+06	760	88.5653	8.90967
D3Z854	Protein Tti1 OS=Rattus norvegicus GN=Tti1 PE=4 SV=1 - [D3Z854_RAT]	0	0.46	1	1	1	1	1.73225e+06	1088	121.034	6.25244
D3ZHS5	Protein Cpa4 OS=Rattus norvegicus GN=Cpa4 PE=4 SV=1 - [D3ZHS5_RAT]	0	1.9	1	1	1	1	1.02386e+07	421	47.3557	6.60986
Q5PPJ1	Intraflagellar transport 122 homolog (Chlamydomonas) OS=Rattus norvegicus GN=Ift122 PE=2 SV=1 - [Q5PPJ1_RAT]	0	0.95	1	1	1	1	3.09683e+06	739	83.5282	7.7085
D3ZZI6	Desmocollin 3 (Predicted) OS=Rattus norvegicus GN=Dsc3 PE=4 SV=1 - [D3ZZI6_RAT]	0	1.44	1	1	1	1	2.53559e+06	900	100.657	5.24951
G3V9H0	RAS p21 protein activator 1, isoform CRA_c OS=Rattus norvegicus GN=Rasa1 PE=4 SV=1 - [G3V9H0_RAT]	0	1.35	2	1	1	1	7.60487e+06	1038	115.383	6.59521
D3ZAN3	Alpha glucosidase 2 alpha neutral subunit (Predicted) OS=Rattus norvegicus GN=Ganab PE=3 SV=1 - [D3ZAN3_RAT]	0	1.13	1	1	1	1		797	90.5149	6.20166
Q2V6E2	GATS (Fragment) OS=Rattus norvegicus GN=Gatsl2 PE=2 SV=1 - [Q2V6E2_RAT]	0	38.64	2	1	1	2	1.73809e+06	44	4.91461	7.25439
B1WCA2	Tetratricopeptide repeat domain 25 OS=Rattus norvegicus GN=Ttc25 PE=2 SV=1 - [B1WCA2_RAT]	0	1.86	2	1	1	1	1.15016e+07	645	73.9894	5.47803
D4ADZ1	Protein Arhgef17 OS=Rattus norvegicus GN=Arhgef17 PE=4 SV=2 - [D4ADZ1_RAT]	0	0.39	1	1	1	1	5.07448e+06	2058	221.98	6.29053
M0RC63	Leucine-rich repeat transmembrane neuronal protein 2 (Fragment) OS=Rattus norvegicus GN=Lrrtm2 PE=4 SV=1 - [M0RC63_RAT]	0	1.56	2	1	1	1	1.9125e+06	514	58.6348	8.00146
E9PTQ3	Protein Adam28 OS=Rattus norvegicus GN=Adam28 PE=4 SV=1 - [E9PTQ3_RAT]	0	1.67	1	1	1	1	2.42599e+06	718	80.7212	6.59521
F1MAF8	Protein Atg2b OS=Rattus norvegicus GN=Atg2b PE=4 SV=1 - [F1MAF8_RAT]	0	1.35	1	2	2	2	7068473	2075	231.321	5.87158
D3ZB51	Protein Igsf9b OS=Rattus norvegicus GN=Igsf9b PE=4 SV=1 - [D3ZB51_RAT]	0	0.6	1	1	1	1	4.26621e+06	1328	144.987	6.69775
D3ZZJ4	Protein Ttc21a OS=Rattus norvegicus GN=Ttc21a PE=4 SV=2 - [D3ZZJ4_RAT]	0	1.29	1	1	1	1	4.09678e+06	1314	148.618	6.78564
F1MA61	Nuclear receptor coactivator 2 OS=Rattus norvegicus GN=Ncoa2 PE=4 SV=2 - [F1MA61_RAT]	0	0.61	2	1	1	1	2.41535e+07	1465	159.146	6.82959
D3Z822	Protein Atr OS=Rattus norvegicus GN=Atr PE=4 SV=2 - [D3Z822_RAT]	0	0.72	1	1	1	1	7.45262e+06	2642	300.966	7.56201
F1M957	von Willebrand factor (Fragment) OS=Rattus norvegicus GN=Vwf PE=4 SV=2 - [F1M957_RAT]	0	0.49	2	1	1	1	5.59898e+06	2051	225.357	5.84619
B5DEP1	Pdcd6 protein OS=Rattus norvegicus GN=Pdcd6 PE=2 SV=1 - [B5DEP1_RAT]	0	5.82	2	1	1	2	1.72892e+06	189	21.6867	5.64307
D4A8D3	Ferritin OS=Rattus norvegicus GN=LOC100363177 PE=3 SV=1 - [D4A8D3_RAT]	0	8.74	7	1	1	1	428236	183	20.7477	6.65381
D3ZBB8	Cytoplasmic dynein 2 heavy chain 1 OS=Rattus norvegicus GN=Dync2h1 PE=4 SV=2 - [D3ZBB8_RAT]	0	0.16	2	1	1	1		4303	491.022	6.72705
D3ZXT2	Protein Stag2 OS=Rattus norvegicus GN=Stag2 PE=4 SV=1 - [D3ZXT2_RAT]	0	1.71	1	1	1	1		1231	141.216	5.40186
D4A885	Protein Abca13 OS=Rattus norvegicus GN=Abca13 PE=4 SV=2 - [D4A885_RAT]	0	0.17	1	1	1	1		3539	401.638	6.50732
D4AAK5	Protein Ripk4 OS=Rattus norvegicus GN=Ripk4 PE=3 SV=1 - [D4AAK5_RAT]	0	1.15	1	1	1	1	9.72736e+06	786	86.6017	7.06396
P97552	Laminin gamma1 (Fragment) OS=Rattus norvegicus GN=Lamc1 PE=2 SV=1 - [P97552_RAT]	0	1.99	2	1	1	1	6.81082e+06	351	38.8297	4.98291
Q64599	Hemiferrin OS=Rattus norvegicus GN=LOC286987 PE=2 SV=1 - [Q64599_RAT]	0	4.17	1	1	1	2	5.28443e+06	216	24.0755	7.66455
F1LUA8	Protein RGD1564651 OS=Rattus norvegicus GN=RGD1564651 PE=4 SV=2 - [F1LUA8_RAT]	0	4.36	1	1	1	1	8.96954e+06	298	33.5945	8.88037
A0A096MJV9	Phosphorylase b kinase regulatory subunit alpha, skeletal muscle isoform OS=Rattus norvegicus GN=Phka1 PE=4 SV=1 - [A0A096MJV9_RAT]	0	0.59	4	1	1	1	2.17789e+07	1182	132.39	5.51611
W4VSR4	Nidogen-2 OS=Rattus norvegicus GN=Nid2 PE=4 SV=1 - [W4VSR4_RAT]	0	0.57	2	1	1	1		1395	152.724	5.43994
A0A096P6L5	Septin-9 OS=Rattus norvegicus GN=Sept9 PE=4 SV=1 - [A0A096P6L5_RAT]	0	1.88	2	1	1	1	1.00379e+08	480	54.0806	6.62451
